# Supplementary material for: Verification of Three-Phase Dependency Analysis Bayesian Network Learning Method for Maize Carotenoid Gene Mining
Source: Biomed Res Int. 2017 Jul 30;2017:1813494. doi: 10.1155/2017/1813494 (PMC5554554; doi:10.1155/2017/1813494)
Supplement: Supplementary file 1 — The experiment data 1 of 109 nodes, the experiment data 2 of 109 nodes, and so on are shown here. [file 1813494.f1.zip]

Archive with 15 entries (14 files):
- Supplementary material/
- Supplementary material/9 Kinds of methods-Interval.csv
- Supplementary material/9 Kinds of methods-Quantile.csv
- Supplementary material/Gene100_1.csv
- Supplementary material/Gene100_10.csv
- Supplementary material/Gene100_2.csv
- Supplementary material/Gene100_3.csv
- Supplementary material/Gene100_4.csv
- Supplementary material/Gene100_5.csv
- Supplementary material/Gene100_6.csv
- Supplementary material/Gene100_7.csv
- Supplementary material/Gene100_8.csv
- Supplementary material/Gene100_9.csv
- Supplementary material/TPDA-Interval.csv
- Supplementary material/TPDA-Quantile.csv
