# Supplementary material for: Verification of Three-Phase Dependency Analysis Bayesian Network Learning Method for Maize Carotenoid Gene Mining
Source: Biomed Res Int. 2017 Jul 30;2017:1813494. doi: 10.1155/2017/1813494 (PMC5554554; doi:10.1155/2017/1813494)
Supplement: Supplementary file 1 — The experiment data 1 of 109 nodes, the experiment data 2 of 109 nodes, and so on are shown here. [file 1813494.f1.zip › Supplementary material/9 Kinds of methods-Interval.csv]

Methods	Discretization methods	Discretization value	Input	All the edge number	Time(s)	Number of edges about 5 component traits	Number of edges between 4 genes and 5 component traits	Ratio of other 100 genes	Ratio of 4 genes	Edges between 4 genes and 5 component
gs	interval	6	D:\RST\Gene100_1.csv	14	0.68200016	2	0	p`= 0.02	P = 0	NULL
gs	interval	6	D:\RST\Gene100_2.csv	6	0.558000088	2	0	p`= 0.02	P = 0	NULL
gs	interval	6	D:\RST\Gene100_3.csv	10	0.638000011	2	0	p`= 0.02	P = 0	NULL
gs	interval	6	D:\RST\Gene100_4.csv	14	0.613999844	2	0	p`= 0.02	P = 0	NULL
gs	interval	6	D:\RST\Gene100_5.csv	14	0.568000078	2	0	p`= 0.02	P = 0	NULL
gs	interval	6	D:\RST\Gene100_6.csv	8	0.592000008	2	0	p`= 0.02	P = 0	NULL
gs	interval	6	D:\RST\Gene100_7.csv	12	0.628999949	2	0	p`= 0.02	P = 0	NULL
gs	interval	6	D:\RST\Gene100_8.csv	12	0.562999964	2	0	p`= 0.02	P = 0	NULL
gs	interval	6	D:\RST\Gene100_9.csv	10	0.587000132	2	0	p`= 0.02	P = 0	NULL
gs	interval	6	D:\RST\Gene100_10.csv	10	0.562000036	2	0	p`= 0.02	P = 0	NULL
gs	interval	5	D:\RST\Gene100_1.csv	26	0.712999821	4	0	p`= 0.04	P = 0	NULL
gs	interval	5	D:\RST\Gene100_2.csv	24	0.65199995	4	0	p`= 0.04	P = 0	NULL
gs	interval	5	D:\RST\Gene100_3.csv	22	0.68200016	4	0	p`= 0.04	P = 0	NULL
gs	interval	5	D:\RST\Gene100_4.csv	26	0.736000061	4	0	p`= 0.04	P = 0	NULL
gs	interval	5	D:\RST\Gene100_5.csv	16	0.661999941	4	0	p`= 0.04	P = 0	NULL
gs	interval	5	D:\RST\Gene100_6.csv	22	0.669999838	4	0	p`= 0.04	P = 0	NULL
gs	interval	5	D:\RST\Gene100_7.csv	24	0.674000025	4	0	p`= 0.04	P = 0	NULL
gs	interval	5	D:\RST\Gene100_8.csv	28	0.684999943	4	0	p`= 0.04	P = 0	NULL
gs	interval	5	D:\RST\Gene100_9.csv	18	0.709000111	4	0	p`= 0.04	P = 0	NULL
gs	interval	5	D:\RST\Gene100_10.csv	24	0.740999937	4	0	p`= 0.04	P = 0	NULL
gs	interval	4	D:\RST\Gene100_1.csv	22	0.664000034	8	0	p`= 0.08	P = 0	NULL
gs	interval	4	D:\RST\Gene100_2.csv	26	0.664000034	8	0	p`= 0.08	P = 0	NULL
gs	interval	4	D:\RST\Gene100_3.csv	20	0.620000124	8	0	p`= 0.08	P = 0	NULL
gs	interval	4	D:\RST\Gene100_4.csv	26	0.631000042	8	0	p`= 0.08	P = 0	NULL
gs	interval	4	D:\RST\Gene100_5.csv	18	0.631000042	8	0	p`= 0.08	P = 0	NULL
gs	interval	4	D:\RST\Gene100_6.csv	20	0.639999866	8	0	p`= 0.08	P = 0	NULL
gs	interval	4	D:\RST\Gene100_7.csv	20	0.634000063	8	0	p`= 0.08	P = 0	NULL
gs	interval	4	D:\RST\Gene100_8.csv	22	0.654999971	8	0	p`= 0.08	P = 0	NULL
gs	interval	4	D:\RST\Gene100_9.csv	26	0.63499999	8	0	p`= 0.08	P = 0	NULL
gs	interval	4	D:\RST\Gene100_10.csv	30	0.63499999	8	0	p`= 0.08	P = 0	NULL
gs	interval	3	D:\RST\Gene100_1.csv	39	0.732000113	5	0	p`= 0.05	P = 0	NULL
gs	interval	3	D:\RST\Gene100_2.csv	40	0.733999968	8	0	p`= 0.08	P = 0	NULL
gs	interval	3	D:\RST\Gene100_3.csv	35	0.73300004	5	0	p`= 0.05	P = 0	NULL
gs	interval	3	D:\RST\Gene100_4.csv	29	0.704999924	5	0	p`= 0.05	P = 0	NULL
gs	interval	3	D:\RST\Gene100_5.csv	23	0.726999998	5	0	p`= 0.05	P = 0	NULL
gs	interval	3	D:\RST\Gene100_6.csv	39	0.720000029	5	0	p`= 0.05	P = 0	NULL
gs	interval	3	D:\RST\Gene100_7.csv	37	0.722000122	5	0	p`= 0.05	P = 0	NULL
gs	interval	3	D:\RST\Gene100_8.csv	37	0.752000093	5	0	p`= 0.05	P = 0	NULL
gs	interval	3	D:\RST\Gene100_9.csv	39	0.717999935	5	0	p`= 0.05	P = 0	NULL
gs	interval	3	D:\RST\Gene100_10.csv	39	0.735000134	5	0	p`= 0.05	P = 0	NULL
gs	interval	2	D:\RST\Gene100_1.csv	52	1.371000051	15	8	p`= 0.07	P = 2	[LUT,GRMZM2G012966] [ZEA,GRMZM2G152135] [ZEA,GRMZM2G300348] [BC,GRMZM2G012966] [GRMZM2G012966,LUT] [GRMZM2G152135,ZEA] [GRMZM2G152135,BC] [GRMZM2G300348,ZEA]
gs	interval	2	D:\RST\Gene100_2.csv	54	1.313000202	12	4	p`= 0.08	P = 1	[ZEA,GRMZM2G152135] [GRMZM2G012966,BC] [GRMZM2G152135,ZEA] [GRMZM2G152135,BC]
gs	interval	2	D:\RST\Gene100_3.csv	56	1.279000044	13	8	p`= 0.05	P = 2	[ZEA,GRMZM2G152135] [ZEA,GRMZM2G300348] [BC,GRMZM2G012966] [GRMZM2G012966,LUT] [GRMZM2G012966,BC] [GRMZM2G152135,ZEA] [GRMZM2G152135,BC] [GRMZM2G300348,ZEA]
gs	interval	2	D:\RST\Gene100_4.csv	47	1.412999868	9	3	p`= 0.06	P = 0.75	[LUT,GRMZM2G012966] [BC,GRMZM2G012966] [GRMZM2G152135,BC]
gs	interval	2	D:\RST\Gene100_5.csv	68	1.254999876	16	8	p`= 0.08	P = 2	[LUT,GRMZM2G012966] [ZEA,GRMZM2G300348] [AC,GRMZM2G152135] [BC,GRMZM2G012966] [GRMZM2G012966,LUT] [GRMZM2G012966,BC] [GRMZM2G152135,AC] [GRMZM2G300348,ZEA]
gs	interval	2	D:\RST\Gene100_6.csv	53	1.321000099	13	8	p`= 0.05	P = 2	[LUT,GRMZM2G012966] [ZEA,GRMZM2G152135] [ZEA,GRMZM2G300348] [BC,GRMZM2G012966] [GRMZM2G012966,LUT] [GRMZM2G152135,ZEA] [GRMZM2G152135,BC] [GRMZM2G300348,ZEA]
gs	interval	2	D:\RST\Gene100_7.csv	61	1.318000078	12	6	p`= 0.06	P = 1.5	[ZEA,GRMZM2G152135] [ZEA,GRMZM2G300348] [BC,GRMZM2G152135] [GRMZM2G012966,LUT] [GRMZM2G012966,BC] [GRMZM2G152135,ZEA]
gs	interval	2	D:\RST\Gene100_8.csv	63	1.365999937	10	4	p`= 0.06	P = 1	[ZEA,GRMZM2G152135] [BC,GRMZM2G012966] [GRMZM2G152135,ZEA] [GRMZM2G152135,BC]
gs	interval	2	D:\RST\Gene100_9.csv	50	1.336999893	11	6	p`= 0.05	P = 1.5	[LUT,GRMZM2G012966] [ZEA,GRMZM2G152135] [BC,GRMZM2G012966] [GRMZM2G012966,LUT] [GRMZM2G152135,ZEA] [GRMZM2G152135,BC]
gs	interval	2	D:\RST\Gene100_10.csv	68	1.348999977	14	6	p`= 0.08	P = 1.5	[LUT,GRMZM2G012966] [ZEA,GRMZM2G152135] [BC,GRMZM2G012966] [GRMZM2G012966,LUT] [GRMZM2G012966,BC] [GRMZM2G152135,ZEA]
hc	interval	6	D:\RST\Gene100_1.csv	15	0.207999945	1	0	p`= 0.01	P = 0	NULL
hc	interval	6	D:\RST\Gene100_2.csv	12	0.164999962	1	0	p`= 0.01	P = 0	NULL
hc	interval	6	D:\RST\Gene100_3.csv	10	0.162999868	1	0	p`= 0.01	P = 0	NULL
hc	interval	6	D:\RST\Gene100_4.csv	6	0.15899992	1	0	p`= 0.01	P = 0	NULL
hc	interval	6	D:\RST\Gene100_5.csv	10	0.174999952	1	0	p`= 0.01	P = 0	NULL
hc	interval	6	D:\RST\Gene100_6.csv	8	0.145999908	1	0	p`= 0.01	P = 0	NULL
hc	interval	6	D:\RST\Gene100_7.csv	6	0.16899991	1	0	p`= 0.01	P = 0	NULL
hc	interval	6	D:\RST\Gene100_8.csv	9	0.15899992	1	0	p`= 0.01	P = 0	NULL
hc	interval	6	D:\RST\Gene100_9.csv	10	0.16899991	1	0	p`= 0.01	P = 0	NULL
hc	interval	6	D:\RST\Gene100_10.csv	12	0.154000044	1	0	p`= 0.01	P = 0	NULL
hc	interval	5	D:\RST\Gene100_1.csv	29	0.228999853	2	0	p`= 0.02	P = 0	NULL
hc	interval	5	D:\RST\Gene100_2.csv	33	0.220000029	2	0	p`= 0.02	P = 0	NULL
hc	interval	5	D:\RST\Gene100_3.csv	19	0.16899991	2	0	p`= 0.02	P = 0	NULL
hc	interval	5	D:\RST\Gene100_4.csv	26	0.203000069	2	0	p`= 0.02	P = 0	NULL
hc	interval	5	D:\RST\Gene100_5.csv	27	0.208999872	2	0	p`= 0.02	P = 0	NULL
hc	interval	5	D:\RST\Gene100_6.csv	21	0.18900013	2	0	p`= 0.02	P = 0	NULL
hc	interval	5	D:\RST\Gene100_7.csv	22	0.184000015	2	0	p`= 0.02	P = 0	NULL
hc	interval	5	D:\RST\Gene100_8.csv	23	0.259000063	2	0	p`= 0.02	P = 0	NULL
hc	interval	5	D:\RST\Gene100_9.csv	28	0.196000099	2	0	p`= 0.02	P = 0	NULL
hc	interval	5	D:\RST\Gene100_10.csv	30	0.222999811	2	0	p`= 0.02	P = 0	NULL
hc	interval	4	D:\RST\Gene100_1.csv	51	0.259000063	3	0	p`= 0.03	P = 0	NULL
hc	interval	4	D:\RST\Gene100_2.csv	51	0.25	3	0	p`= 0.03	P = 0	NULL
hc	interval	4	D:\RST\Gene100_3.csv	43	0.253000021	3	0	p`= 0.03	P = 0	NULL
hc	interval	4	D:\RST\Gene100_4.csv	58	0.256000042	3	0	p`= 0.03	P = 0	NULL
hc	interval	4	D:\RST\Gene100_5.csv	56	0.25	3	0	p`= 0.03	P = 0	NULL
hc	interval	4	D:\RST\Gene100_6.csv	50	0.235999823	3	0	p`= 0.03	P = 0	NULL
hc	interval	4	D:\RST\Gene100_7.csv	62	0.27699995	3	0	p`= 0.03	P = 0	NULL
hc	interval	4	D:\RST\Gene100_8.csv	51	0.25	3	0	p`= 0.03	P = 0	NULL
hc	interval	4	D:\RST\Gene100_9.csv	50	0.271000147	3	0	p`= 0.03	P = 0	NULL
hc	interval	4	D:\RST\Gene100_10.csv	54	0.266000032	3	0	p`= 0.03	P = 0	NULL
hc	interval	3	D:\RST\Gene100_1.csv	88	0.325000048	6	1	p`= 0.05	P = 0.25	[LUT,GRMZM2G300348]
hc	interval	3	D:\RST\Gene100_2.csv	91	0.41899991	5	1	p`= 0.04	P = 0.25	[LUT,GRMZM2G300348]
hc	interval	3	D:\RST\Gene100_3.csv	86	0.30700016	7	1	p`= 0.06	P = 0.25	[LUT,GRMZM2G300348]
hc	interval	3	D:\RST\Gene100_4.csv	88	0.32400012	5	1	p`= 0.04	P = 0.25	[LUT,GRMZM2G300348]
hc	interval	3	D:\RST\Gene100_5.csv	93	0.336000204	6	1	p`= 0.05	P = 0.25	[LUT,GRMZM2G300348]
hc	interval	3	D:\RST\Gene100_6.csv	92	0.319000006	5	1	p`= 0.04	P = 0.25	[LUT,GRMZM2G300348]
hc	interval	3	D:\RST\Gene100_7.csv	91	0.323999882	5	1	p`= 0.04	P = 0.25	[LUT,GRMZM2G300348]
hc	interval	3	D:\RST\Gene100_8.csv	94	0.351000071	6	1	p`= 0.05	P = 0.25	[LUT,GRMZM2G300348]
hc	interval	3	D:\RST\Gene100_9.csv	85	0.299000025	5	1	p`= 0.04	P = 0.25	[LUT,GRMZM2G300348]
hc	interval	3	D:\RST\Gene100_10.csv	88	0.351999998	6	1	p`= 0.05	P = 0.25	[LUT,GRMZM2G300348]
hc	interval	2	D:\RST\Gene100_1.csv	195	0.582000017	22	4	p`= 0.18	P = 1	[LUT,GRMZM2G012966] [GRMZM2G152135,BC] [BC,GRMZM2G012966] [GRMZM2G152135,ZEA]
hc	interval	2	D:\RST\Gene100_2.csv	192	0.601999998	11	3	p`= 0.08	P = 0.75	[GRMZM2G012966,LUT] [GRMZM2G152135,BC] [BC,GRMZM2G012966]
hc	interval	2	D:\RST\Gene100_3.csv	183	0.575000048	15	3	p`= 0.12	P = 0.75	[GRMZM2G152135,BC] [BC,GRMZM2G012966] [GRMZM2G012966,LUT]
hc	interval	2	D:\RST\Gene100_4.csv	188	0.605000019	13	4	p`= 0.09	P = 1	[LUT,GRMZM2G012966] [GRMZM2G152135,BC] [BC,GRMZM2G012966] [GRMZM2G152135,ZEA]
hc	interval	2	D:\RST\Gene100_5.csv	196	0.609000206	17	4	p`= 0.13	P = 1	[LUT,GRMZM2G012966] [GRMZM2G152135,BC] [BC,GRMZM2G012966] [GRMZM2G300348,ZEA]
hc	interval	2	D:\RST\Gene100_6.csv	191	0.570999861	10	2	p`= 0.08	P = 0.5	[LUT,GRMZM2G012966] [GRMZM2G152135,BC]
hc	interval	2	D:\RST\Gene100_7.csv	191	0.605999947	18	4	p`= 0.14	P = 1	[LUT,GRMZM2G012966] [GRMZM2G152135,BC] [BC,GRMZM2G012966] [ZEA,GRMZM2G152135]
hc	interval	2	D:\RST\Gene100_8.csv	191	0.625	17	3	p`= 0.14	P = 0.75	[GRMZM2G012966,LUT] [BC,GRMZM2G012966] [GRMZM2G152135,BC]
hc	interval	2	D:\RST\Gene100_9.csv	191	0.601999998	15	4	p`= 0.11	P = 1	[LUT,GRMZM2G012966] [GRMZM2G152135,BC] [BC,GRMZM2G012966] [ZEA,GRMZM2G300348]
hc	interval	2	D:\RST\Gene100_10.csv	195	0.629999876	14	4	p`= 0.1	P = 1	[LUT,GRMZM2G012966] [GRMZM2G152135,BC] [ZEA,GRMZM2G300348] [GRMZM2G152135,ZEA]
iamb	interval	6	D:\RST\Gene100_1.csv	50	1.305999994	4	0	p`= 0.04	P = 0	NULL
iamb	interval	6	D:\RST\Gene100_2.csv	58	0.311000109	4	0	p`= 0.04	P = 0	NULL
iamb	interval	6	D:\RST\Gene100_3.csv	52	1.116999865	4	0	p`= 0.04	P = 0	NULL
iamb	interval	6	D:\RST\Gene100_4.csv	64	0.421000004	4	0	p`= 0.04	P = 0	NULL
iamb	interval	6	D:\RST\Gene100_5.csv	56	1.245000124	4	0	p`= 0.04	P = 0	NULL
iamb	interval	6	D:\RST\Gene100_6.csv	64	0.31099987	4	0	p`= 0.04	P = 0	NULL
iamb	interval	6	D:\RST\Gene100_7.csv	54	0.42200017	4	0	p`= 0.04	P = 0	NULL
iamb	interval	6	D:\RST\Gene100_8.csv	66	0.338999987	4	0	p`= 0.04	P = 0	NULL
iamb	interval	6	D:\RST\Gene100_9.csv	60	0.10408	4	0	p`= 0.04	P = 0	NULL
iamb	interval	6	D:\RST\Gene100_10.csv	46	0.534999847	4	0	p`= 0.04	P = 0	NULL
iamb	interval	5	D:\RST\Gene100_1.csv	44	1.090999842	4	0	p`= 0.04	P = 0	NULL
iamb	interval	5	D:\RST\Gene100_2.csv	54	0.492999792	4	0	p`= 0.04	P = 0	NULL
iamb	interval	5	D:\RST\Gene100_3.csv	50	0.11777	4	0	p`= 0.04	P = 0	NULL
iamb	interval	5	D:\RST\Gene100_4.csv	66	0.332000017	4	0	p`= 0.04	P = 0	NULL
iamb	interval	5	D:\RST\Gene100_5.csv	58	0.415999889	4	0	p`= 0.04	P = 0	NULL
iamb	interval	5	D:\RST\Gene100_6.csv	62	0.312000036	4	0	p`= 0.04	P = 0	NULL
iamb	interval	5	D:\RST\Gene100_7.csv	60	3.643000126	4	0	p`= 0.04	P = 0	NULL
iamb	interval	5	D:\RST\Gene100_8.csv	56	2.072999954	4	0	p`= 0.04	P = 0	NULL
iamb	interval	5	D:\RST\Gene100_9.csv	44	0.15539	4	0	p`= 0.04	P = 0	NULL
iamb	interval	5	D:\RST\Gene100_10.csv	48	0.338999987	4	0	p`= 0.04	P = 0	NULL
iamb	interval	4	D:\RST\Gene100_1.csv	78	1.662999868	10	2	p`= 0.08	P = 0.5	[BC,GRMZM2G152135] [GRMZM2G152135,BC]
iamb	interval	4	D:\RST\Gene100_2.csv	110	0.421000004	10	2	p`= 0.08	P = 0.5	[BC,GRMZM2G152135] [GRMZM2G152135,BC]
iamb	interval	4	D:\RST\Gene100_3.csv	86	0.28658	8	0	p`= 0.08	P = 0	NULL
iamb	interval	4	D:\RST\Gene100_4.csv	104	0.445000172	10	2	p`= 0.08	P = 0.5	[BC,GRMZM2G152135] [GRMZM2G152135,BC]
iamb	interval	4	D:\RST\Gene100_5.csv	102	0.392999887	10	2	p`= 0.08	P = 0.5	[BC,GRMZM2G152135] [GRMZM2G152135,BC]
iamb	interval	4	D:\RST\Gene100_6.csv	110	0.359000206	10	2	p`= 0.08	P = 0.5	[BC,GRMZM2G152135] [GRMZM2G152135,BC]
iamb	interval	4	D:\RST\Gene100_7.csv	104	0.354999781	8	0	p`= 0.08	P = 0	NULL
iamb	interval	4	D:\RST\Gene100_8.csv	90	0.444999933	9	1	p`= 0.08	P = 0.25	[BC,GRMZM2G152135]
iamb	interval	4	D:\RST\Gene100_9.csv	86	0.5	10	2	p`= 0.08	P = 0.5	[BC,GRMZM2G152135] [GRMZM2G152135,BC]
iamb	interval	4	D:\RST\Gene100_10.csv	92	0.641000032	8	2	p`= 0.06	P = 0.5	[BC,GRMZM2G152135] [GRMZM2G152135,BC]
iamb	interval	3	D:\RST\Gene100_1.csv	106	0.410000086	6	0	p`= 0.06	P = 0	NULL
iamb	interval	3	D:\RST\Gene100_2.csv	110	0.426000118	10	0	p`= 0.1	P = 0	NULL
iamb	interval	3	D:\RST\Gene100_3.csv	103	0.572000027	12	0	p`= 0.12	P = 0	NULL
iamb	interval	3	D:\RST\Gene100_4.csv	110	0.361999989	8	0	p`= 0.08	P = 0	NULL
iamb	interval	3	D:\RST\Gene100_5.csv	122	0.400000095	8	0	p`= 0.08	P = 0	NULL
iamb	interval	3	D:\RST\Gene100_6.csv	96	0.373000145	6	0	p`= 0.06	P = 0	NULL
iamb	interval	3	D:\RST\Gene100_7.csv	116	0.369999886	10	2	p`= 0.08	P = 0.5	[LUT,GRMZM2G300348] [GRMZM2G300348,LUT]
iamb	interval	3	D:\RST\Gene100_8.csv	113	0.355999947	8	0	p`= 0.08	P = 0	NULL
iamb	interval	3	D:\RST\Gene100_9.csv	107	0.428000212	6	0	p`= 0.06	P = 0	NULL
iamb	interval	3	D:\RST\Gene100_10.csv	90	0.459000111	8	0	p`= 0.08	P = 0	NULL
iamb	interval	2	D:\RST\Gene100_1.csv	137	0.726999998	20	4	p`= 0.16	P = 1	[ZEA,GRMZM2G152135] [BC,GRMZM2G012966] [GRMZM2G012966,BC] [GRMZM2G152135,ZEA]
iamb	interval	2	D:\RST\Gene100_2.csv	133	0.761000156	8	2	p`= 0.06	P = 0.5	[GRMZM2G012966,BC] [GRMZM2G152135,BC]
iamb	interval	2	D:\RST\Gene100_3.csv	123	0.744000196	11	3	p`= 0.08	P = 0.75	[GRMZM2G012966,BC] [GRMZM2G152135,BC] [GRMZM2G300348,ZEA]
iamb	interval	2	D:\RST\Gene100_4.csv	143	0.762000084	12	4	p`= 0.08	P = 1	[BC,GRMZM2G012966] [GRMZM2G012966,LUT] [GRMZM2G152135,ZEA] [GRMZM2G152135,BC]
iamb	interval	2	D:\RST\Gene100_5.csv	129	0.747999907	9	3	p`= 0.06	P = 0.75	[ZEA,GRMZM2G300348] [BC,GRMZM2G152135] [GRMZM2G012966,BC]
iamb	interval	2	D:\RST\Gene100_6.csv	126	0.83100009	7	2	p`= 0.05	P = 0.5	[ZEA,GRMZM2G300348] [GRMZM2G012966,Bcry]
iamb	interval	2	D:\RST\Gene100_7.csv	108	0.772000074	8	3	p`= 0.05	P = 0.75	[LUT,GRMZM2G012966] [BC,GRMZM2G012966] [GRMZM2G152135,BC]
iamb	interval	2	D:\RST\Gene100_8.csv	134	0.99000001	8	1	p`= 0.07	P = 0.25	[GRMZM2G152135,BC]
iamb	interval	2	D:\RST\Gene100_9.csv	120	0.767000198	12	6	p`= 0.06	P = 1.5	[LUT,GRMZM2G012966] [ZEA,GRMZM2G300348] [BC,GRMZM2G012966] [GRMZM2G012966,LUT] [GRMZM2G152135,BC] [GRMZM2G300348,ZEA]
iamb	interval	2	D:\RST\Gene100_10.csv	135	0.844000101	11	6	p`= 0.05	P = 1.5	[LUT,GRMZM2G012966] [ZEA,GRMZM2G152135] [BC,GRMZM2G012966] [GRMZM2G012966,LUT] [GRMZM2G152135,ZEA] [GRMZM2G152135,BC]
mmpc	interval	6	D:\RST\Gene100_1.csv	58	0.463999987	6	2	p`= 0.04	P = 0.5	[BC,GRMZM2G012966] [GRMZM2G012966,BC]
mmpc	interval	6	D:\RST\Gene100_2.csv	70	0.468999863	4	2	p`= 0.02	P = 0.5	[BC,GRMZM2G012966] [GRMZM2G012966,BC]
mmpc	interval	6	D:\RST\Gene100_3.csv	62	0.46600008	6	2	p`= 0.04	P = 0.5	[BC,GRMZM2G012966] [GRMZM2G012966,BC]
mmpc	interval	6	D:\RST\Gene100_4.csv	66	0.458000183	6	2	p`= 0.04	P = 0.5	[BC,GRMZM2G012966] [GRMZM2G012966,BC]
mmpc	interval	6	D:\RST\Gene100_5.csv	62	0.465000153	4	2	p`= 0.02	P = 0.5	[BC,GRMZM2G012966] [GRMZM2G012966,BC]
mmpc	interval	6	D:\RST\Gene100_6.csv	76	0.458999872	4	2	p`= 0.02	P = 0.5	[BC,GRMZM2G012966] [GRMZM2G012966,BC]
mmpc	interval	6	D:\RST\Gene100_7.csv	66	0.453999996	4	2	p`= 0.02	P = 0.5	[BC,GRMZM2G012966] [GRMZM2G012966,BC]
mmpc	interval	6	D:\RST\Gene100_8.csv	58	0.450000048	6	2	p`= 0.04	P = 0.5	[BC,GRMZM2G012966] [GRMZM2G012966,BC]
mmpc	interval	6	D:\RST\Gene100_9.csv	64	0.447999954	6	2	p`= 0.04	P = 0.5	[BC,GRMZM2G012966] [GRMZM2G012966,BC]
mmpc	interval	6	D:\RST\Gene100_10.csv	68	0.459000111	4	2	p`= 0.02	P = 0.5	[BC,GRMZM2G012966] [GRMZM2G012966,BC]
mmpc	interval	5	D:\RST\Gene100_1.csv	40	0.460000038	4	0	p`= 0.04	P = 0	NULL
mmpc	interval	5	D:\RST\Gene100_2.csv	70	0.45600009	4	0	p`= 0.04	P = 0	NULL
mmpc	interval	5	D:\RST\Gene100_3.csv	52	0.460999966	4	0	p`= 0.04	P = 0	NULL
mmpc	interval	5	D:\RST\Gene100_4.csv	64	0.461999893	4	0	p`= 0.04	P = 0	NULL
mmpc	interval	5	D:\RST\Gene100_5.csv	66	0.480999947	4	0	p`= 0.04	P = 0	NULL
mmpc	interval	5	D:\RST\Gene100_6.csv	58	0.467000008	4	0	p`= 0.04	P = 0	NULL
mmpc	interval	5	D:\RST\Gene100_7.csv	62	0.451999903	4	0	p`= 0.04	P = 0	NULL
mmpc	interval	5	D:\RST\Gene100_8.csv	60	0.473999977	4	0	p`= 0.04	P = 0	NULL
mmpc	interval	5	D:\RST\Gene100_9.csv	52	0.444000006	4	0	p`= 0.04	P = 0	NULL
mmpc	interval	5	D:\RST\Gene100_10.csv	52	0.474999905	4	0	p`= 0.04	P = 0	NULL
mmpc	interval	4	D:\RST\Gene100_1.csv	78	0.486999989	10	2	p`= 0.08	P = 0.5	[BC,GRMZM2G152135] [GRMZM2G152135,BC]
mmpc	interval	4	D:\RST\Gene100_2.csv	88	0.480000019	10	2	p`= 0.08	P = 0.5	[BC,GRMZM2G152135] [GRMZM2G152135,BC]
mmpc	interval	4	D:\RST\Gene100_3.csv	98	0.477999926	10	2	p`= 0.08	P = 0.5	[BC,GRMZM2G152135] [GRMZM2G152135,BC]
mmpc	interval	4	D:\RST\Gene100_4.csv	108	0.476999998	10	2	p`= 0.08	P = 0.5	[BC,GRMZM2G152135] [GRMZM2G152135,BC]
mmpc	interval	4	D:\RST\Gene100_5.csv	76	0.478000164	10	2	p`= 0.08	P = 0.5	[BC,GRMZM2G152135] [GRMZM2G152135,BC]
mmpc	interval	4	D:\RST\Gene100_6.csv	86	0.479999781	10	2	p`= 0.08	P = 0.5	[BC,GRMZM2G152135] [GRMZM2G152135,BC]
mmpc	interval	4	D:\RST\Gene100_7.csv	84	0.579999924	10	2	p`= 0.08	P = 0.5	[BC,GRMZM2G152135] [GRMZM2G152135,BC]
mmpc	interval	4	D:\RST\Gene100_8.csv	100	0.503999949	10	2	p`= 0.08	P = 0.5	[BC,GRMZM2G152135] [GRMZM2G152135,BC]
mmpc	interval	4	D:\RST\Gene100_9.csv	94	0.473999977	10	2	p`= 0.08	P = 0.5	[BC,GRMZM2G152135] [GRMZM2G152135,BC]
mmpc	interval	4	D:\RST\Gene100_10.csv	104	0.509000063	10	2	p`= 0.08	P = 0.5	[BC,GRMZM2G152135] [GRMZM2G152135,BC]
mmpc	interval	3	D:\RST\Gene100_1.csv	88	0.519000053	10	2	p`= 0.08	P = 0.5	[BC,GRMZM2G012966] [GRMZM2G012966,BC]
mmpc	interval	3	D:\RST\Gene100_2.csv	102	0.502000093	10	2	p`= 0.08	P = 0.5	[BC,GRMZM2G012966] [GRMZM2G012966,BC]
mmpc	interval	3	D:\RST\Gene100_3.csv	92	0.549999952	10	2	p`= 0.08	P = 0.5	[BC,GRMZM2G012966] [GRMZM2G012966,BC]
mmpc	interval	3	D:\RST\Gene100_4.csv	124	0.546999931	12	2	p`= 0.1	P = 0.5	[BC,GRMZM2G012966] [GRMZM2G012966,BC]
mmpc	interval	3	D:\RST\Gene100_5.csv	96	0.491999865	10	2	p`= 0.08	P = 0.5	[BC,GRMZM2G012966] [GRMZM2G012966,BC]
mmpc	interval	3	D:\RST\Gene100_6.csv	112	0.505000114	8	0	p`= 0.08	P = 0	NULL
mmpc	interval	3	D:\RST\Gene100_7.csv	96	0.509000063	12	2	p`= 0.1	P = 0.5	[BC,GRMZM2G012966] [GRMZM2G012966,BC]
mmpc	interval	3	D:\RST\Gene100_8.csv	86	0.523000002	8	0	p`= 0.08	P = 0	NULL
mmpc	interval	3	D:\RST\Gene100_9.csv	86	0.496999979	8	0	p`= 0.08	P = 0	NULL
mmpc	interval	3	D:\RST\Gene100_10.csv	94	0.532999992	14	2	p`= 0.12	P = 0.5	[BC,GRMZM2G012966] [GRMZM2G012966,BC]
mmpc	interval	2	D:\RST\Gene100_1.csv	186	0.559999943	22	8	p`= 0.14	P = 2	[LUT,GRMZM2G012966] [ZEA,GRMZM2G300348] [ZEA,GRMZM2G152135] [BC,GRMZM2G012966] [GRMZM2G012966,BC] [GRMZM2G012966,LUT] [GRMZM2G152135,ZEA] [GRMZM2G300348,ZEA]
mmpc	interval	2	D:\RST\Gene100_2.csv	176	0.552999973	10	4	p`= 0.06	P = 1	[LUT,GRMZM2G012966] [BC,GRMZM2G012966] [GRMZM2G012966,BC] [GRMZM2G012966,LUT]
mmpc	interval	2	D:\RST\Gene100_3.csv	192	0.559999943	20	8	p`= 0.12	P = 2	[LUT,GRMZM2G012966] [ZEA,GRMZM2G300348] [ZEA,GRMZM2G152135] [BC,GRMZM2G012966] [GRMZM2G012966,BC] [GRMZM2G012966,LUT] [GRMZM2G152135,ZEA] [GRMZM2G300348,ZEA]
mmpc	interval	2	D:\RST\Gene100_4.csv	178	0.554000139	14	6	p`= 0.08	P = 1.5	[LUT,GRMZM2G012966] [ZEA,GRMZM2G300348] [BC,GRMZM2G012966] [GRMZM2G012966,BC] [GRMZM2G012966,LUT] [GRMZM2G300348,ZEA]
mmpc	interval	2	D:\RST\Gene100_5.csv	160	0.542999983	14	6	p`= 0.08	P = 1.5	[LUT,GRMZM2G012966] [ZEA,GRMZM2G300348] [BC,GRMZM2G012966] [GRMZM2G012966,BC] [GRMZM2G012966,LUT] [GRMZM2G300348,ZEA]
mmpc	interval	2	D:\RST\Gene100_6.csv	174	0.535000086	10	4	p`= 0.06	P = 1	[LUT,GRMZM2G012966] [BC,GRMZM2G012966] [GRMZM2G012966,BC] [GRMZM2G012966,LUT]
mmpc	interval	2	D:\RST\Gene100_7.csv	146	0.561000109	16	6	p`= 0.1	P = 1.5	[LUT,GRMZM2G012966] [ZEA,GRMZM2G300348] [BC,GRMZM2G012966] [GRMZM2G012966,BC] [GRMZM2G012966,LUT] [GRMZM2G300348,ZEA]
mmpc	interval	2	D:\RST\Gene100_8.csv	178	0.569000006	18	6	p`= 0.12	P = 1.5	[ZEA,GRMZM2G300348] [ZEA,GRMZM2G152135] [BC,GRMZM2G012966] [GRMZM2G012966,BC] [GRMZM2G152135,ZEA] [GRMZM2G300348,ZEA]
mmpc	interval	2	D:\RST\Gene100_9.csv	176	0.555000067	24	10	p`= 0.14	P = 2.5	[LUT,GRMZM2G012966] [ZEA,GRMZM2G300348] [ZEA,GRMZM2G152135] [BC,GRMZM2G152135] [BC,GRMZM2G012966] [GRMZM2G012966,BC] [GRMZM2G012966,LUT] [GRMZM2G152135,BC] [GRMZM2G152135,ZEA] [GRMZM2G300348,ZEA]
mmpc	interval	2	D:\RST\Gene100_10.csv	166	0.64199996	14	6	p`= 0.08	P = 1.5	[LUT,GRMZM2G012966] [ZEA,GRMZM2G300348] [BC,GRMZM2G012966] [GRMZM2G012966,BC] [GRMZM2G012966,LUT] [GRMZM2G300348,ZEA]
rsmax2	interval	6	D:\RST\Gene100_1.csv	3	0.625999928	0	0	p`= 0	P = 0	NULL
rsmax2	interval	6	D:\RST\Gene100_2.csv	1	0.572999954	0	0	p`= 0	P = 0	NULL
rsmax2	interval	6	D:\RST\Gene100_3.csv	3	0.58100009	0	0	p`= 0	P = 0	NULL
rsmax2	interval	6	D:\RST\Gene100_4.csv	1	0.612999916	0	0	p`= 0	P = 0	NULL
rsmax2	interval	6	D:\RST\Gene100_5.csv	2	0.605000019	0	0	p`= 0	P = 0	NULL
rsmax2	interval	6	D:\RST\Gene100_6.csv	1	0.592000008	0	0	p`= 0	P = 0	NULL
rsmax2	interval	6	D:\RST\Gene100_7.csv	1	0.583999872	0	0	p`= 0	P = 0	NULL
rsmax2	interval	6	D:\RST\Gene100_8.csv	4	0.585999966	0	0	p`= 0	P = 0	NULL
rsmax2	interval	6	D:\RST\Gene100_9.csv	3	0.578999996	0	0	p`= 0	P = 0	NULL
rsmax2	interval	6	D:\RST\Gene100_10.csv	2	0.56099987	0	0	p`= 0	P = 0	NULL
rsmax2	interval	5	D:\RST\Gene100_1.csv	2	0.67599988	1	0	p`= 0.01	P = 0	NULL
rsmax2	interval	5	D:\RST\Gene100_2.csv	5	0.691999912	1	0	p`= 0.01	P = 0	NULL
rsmax2	interval	5	D:\RST\Gene100_3.csv	2	0.676000118	1	0	p`= 0.01	P = 0	NULL
rsmax2	interval	5	D:\RST\Gene100_4.csv	5	0.704999924	1	0	p`= 0.01	P = 0	NULL
rsmax2	interval	5	D:\RST\Gene100_5.csv	4	0.683000088	1	0	p`= 0.01	P = 0	NULL
rsmax2	interval	5	D:\RST\Gene100_6.csv	3	0.734999895	1	0	p`= 0.01	P = 0	NULL
rsmax2	interval	5	D:\RST\Gene100_7.csv	3	0.667999983	1	0	p`= 0.01	P = 0	NULL
rsmax2	interval	5	D:\RST\Gene100_8.csv	2	0.711999893	1	0	p`= 0.01	P = 0	NULL
rsmax2	interval	5	D:\RST\Gene100_9.csv	3	0.670000076	1	0	p`= 0.01	P = 0	NULL
rsmax2	interval	5	D:\RST\Gene100_10.csv	3	0.71600008	1	0	p`= 0.01	P = 0	NULL
rsmax2	interval	4	D:\RST\Gene100_1.csv	4	0.701999903	3	0	p`= 0.03	P = 0	NULL
rsmax2	interval	4	D:\RST\Gene100_2.csv	7	0.664000034	3	0	p`= 0.03	P = 0	NULL
rsmax2	interval	4	D:\RST\Gene100_3.csv	3	0.64199996	3	0	p`= 0.03	P = 0	NULL
rsmax2	interval	4	D:\RST\Gene100_4.csv	7	0.652999878	3	0	p`= 0.03	P = 0	NULL
rsmax2	interval	4	D:\RST\Gene100_5.csv	5	0.651000023	3	0	p`= 0.03	P = 0	NULL
rsmax2	interval	4	D:\RST\Gene100_6.csv	4	0.644000053	3	0	p`= 0.03	P = 0	NULL
rsmax2	interval	4	D:\RST\Gene100_7.csv	4	0.626999855	3	0	p`= 0.03	P = 0	NULL
rsmax2	interval	4	D:\RST\Gene100_8.csv	4	0.709000111	3	0	p`= 0.03	P = 0	NULL
rsmax2	interval	4	D:\RST\Gene100_9.csv	5	0.633000135	3	0	p`= 0.03	P = 0	NULL
rsmax2	interval	4	D:\RST\Gene100_10.csv	4	0.669000149	3	0	p`= 0.03	P = 0	NULL
rsmax2	interval	3	D:\RST\Gene100_1.csv	12	0.73300004	4	0	p`= 0.04	P = 0	NULL
rsmax2	interval	3	D:\RST\Gene100_2.csv	12	0.745000124	4	0	p`= 0.04	P = 0	NULL
rsmax2	interval	3	D:\RST\Gene100_3.csv	14	0.746999979	4	0	p`= 0.04	P = 0	NULL
rsmax2	interval	3	D:\RST\Gene100_4.csv	10	0.71600008	4	0	p`= 0.04	P = 0	NULL
rsmax2	interval	3	D:\RST\Gene100_5.csv	9	0.723999977	4	0	p`= 0.04	P = 0	NULL
rsmax2	interval	3	D:\RST\Gene100_6.csv	17	0.733999968	4	0	p`= 0.04	P = 0	NULL
rsmax2	interval	3	D:\RST\Gene100_7.csv	16	0.744999886	4	0	p`= 0.04	P = 0	NULL
rsmax2	interval	3	D:\RST\Gene100_8.csv	15	0.820999861	4	0	p`= 0.04	P = 0	NULL
rsmax2	interval	3	D:\RST\Gene100_9.csv	15	0.753999949	4	0	p`= 0.04	P = 0	NULL
rsmax2	interval	3	D:\RST\Gene100_10.csv	12	0.773000002	4	0	p`= 0.04	P = 0	NULL
rsmax2	interval	2	D:\RST\Gene100_1.csv	25	1.303000212	10	5	p`= 0.05	P = 1.25	[LUT,GRMZM2G012966] [GRMZM2G152135,BC] [BC,GRMZM2G012966] [ZEA,GRMZM2G152135] [ZEA,GRMZM2G300348]
rsmax2	interval	2	D:\RST\Gene100_2.csv	31	1.333999872	7	3	p`= 0.04	P = 0.75	[BC,GRMZM2G012966] [GRMZM2G152135,BC] [ZEA,GRMZM2G152135]
rsmax2	interval	2	D:\RST\Gene100_3.csv	27	1.320999861	8	4	p`= 0.04	P = 1	[LUT,GRMZM2G012966] [GRMZM2G152135,BC] [BC,GRMZM2G012966] [GRMZM2G152135,ZEA]
rsmax2	interval	2	D:\RST\Gene100_4.csv	23	1.473999977	7	3	p`= 0.04	P = 0.75	[LUT,GRMZM2G012966] [GRMZM2G152135,BC] [BC,GRMZM2G012966]
rsmax2	interval	2	D:\RST\Gene100_5.csv	32	1.289000034	8	4	p`= 0.04	P = 1	[LUT,GRMZM2G012966] [BC,GRMZM2G012966] [AC,GRMZM2G152135] [ZEA,GRMZM2G300348]
rsmax2	interval	2	D:\RST\Gene100_6.csv	29	1.332000017	9	5	p`= 0.04	P = 1.25	[LUT,GRMZM2G012966] [GRMZM2G152135,BC] [BC,GRMZM2G012966] [ZEA,GRMZM2G152135] [ZEA,GRMZM2G300348]
rsmax2	interval	2	D:\RST\Gene100_7.csv	31	1.363999844	10	5	p`= 0.05	P = 1.25	[LUT,GRMZM2G012966] [GRMZM2G152135,BC] [BC,GRMZM2G012966] [ZEA,GRMZM2G152135] [ZEA,GRMZM2G300348]
rsmax2	interval	2	D:\RST\Gene100_8.csv	32	1.301000118	8	3	p`= 0.05	P = 0.75	[BC,GRMZM2G012966] [GRMZM2G152135,BC] [ZEA,GRMZM2G152135]
rsmax2	interval	2	D:\RST\Gene100_9.csv	24	1.372999907	8	4	p`= 0.04	P = 1	[LUT,GRMZM2G012966] [GRMZM2G152135,BC] [BC,GRMZM2G012966] [ZEA,GRMZM2G152135]
rsmax2	interval	2	D:\RST\Gene100_10.csv	33	1.395999908	7	3	p`= 0.04	P = 0.75	[LUT,GRMZM2G012966] [BC,GRMZM2G012966] [ZEA,GRMZM2G152135]
tabu	interval	6	D:\RST\Gene100_1.csv	15	0.224999905	1	0	p`= 0.01	P = 0	NULL
tabu	interval	6	D:\RST\Gene100_2.csv	12	0.201999903	1	0	p`= 0.01	P = 0	NULL
tabu	interval	6	D:\RST\Gene100_3.csv	10	0.273999929	1	0	p`= 0.01	P = 0	NULL
tabu	interval	6	D:\RST\Gene100_4.csv	6	0.184999943	1	0	p`= 0.01	P = 0	NULL
tabu	interval	6	D:\RST\Gene100_5.csv	10	0.201999903	1	0	p`= 0.01	P = 0	NULL
tabu	interval	6	D:\RST\Gene100_6.csv	8	0.18900013	1	0	p`= 0.01	P = 0	NULL
tabu	interval	6	D:\RST\Gene100_7.csv	6	0.196000099	1	0	p`= 0.01	P = 0	NULL
tabu	interval	6	D:\RST\Gene100_8.csv	10	0.245000124	1	0	p`= 0.01	P = 0	NULL
tabu	interval	6	D:\RST\Gene100_9.csv	10	0.20299983	1	0	p`= 0.01	P = 0	NULL
tabu	interval	6	D:\RST\Gene100_10.csv	12	0.199999809	1	0	p`= 0.01	P = 0	NULL
tabu	interval	5	D:\RST\Gene100_1.csv	29	0.247999907	2	0	p`= 0.02	P = 0	NULL
tabu	interval	5	D:\RST\Gene100_2.csv	33	0.264999866	2	0	p`= 0.02	P = 0	NULL
tabu	interval	5	D:\RST\Gene100_3.csv	19	0.281999826	2	0	p`= 0.02	P = 0	NULL
tabu	interval	5	D:\RST\Gene100_4.csv	26	0.248000145	2	0	p`= 0.02	P = 0	NULL
tabu	interval	5	D:\RST\Gene100_5.csv	27	0.246000051	2	0	p`= 0.02	P = 0	NULL
tabu	interval	5	D:\RST\Gene100_6.csv	21	0.211999893	2	0	p`= 0.02	P = 0	NULL
tabu	interval	5	D:\RST\Gene100_7.csv	22	0.218999863	2	0	p`= 0.02	P = 0	NULL
tabu	interval	5	D:\RST\Gene100_8.csv	23	0.233999968	2	0	p`= 0.02	P = 0	NULL
tabu	interval	5	D:\RST\Gene100_9.csv	28	0.231999874	2	0	p`= 0.02	P = 0	NULL
tabu	interval	5	D:\RST\Gene100_10.csv	30	0.273000002	2	0	p`= 0.02	P = 0	NULL
tabu	interval	4	D:\RST\Gene100_1.csv	53	0.348999977	3	0	p`= 0.03	P = 0	NULL
tabu	interval	4	D:\RST\Gene100_2.csv	51	0.291999817	3	0	p`= 0.03	P = 0	NULL
tabu	interval	4	D:\RST\Gene100_3.csv	43	0.268999815	3	0	p`= 0.03	P = 0	NULL
tabu	interval	4	D:\RST\Gene100_4.csv	58	0.315000057	3	0	p`= 0.03	P = 0	NULL
tabu	interval	4	D:\RST\Gene100_5.csv	57	0.322999954	3	0	p`= 0.03	P = 0	NULL
tabu	interval	4	D:\RST\Gene100_6.csv	50	0.287999868	3	0	p`= 0.03	P = 0	NULL
tabu	interval	4	D:\RST\Gene100_7.csv	64	0.353000164	3	0	p`= 0.03	P = 0	NULL
tabu	interval	4	D:\RST\Gene100_8.csv	52	0.345999956	3	0	p`= 0.03	P = 0	NULL
tabu	interval	4	D:\RST\Gene100_9.csv	50	0.282999992	3	0	p`= 0.03	P = 0	NULL
tabu	interval	4	D:\RST\Gene100_10.csv	54	0.309000015	3	0	p`= 0.03	P = 0	NULL
tabu	interval	3	D:\RST\Gene100_1.csv	89	0.380000114	7	1	p`= 0.06	P = 0.25	[LUT,GRMZM2G300348]
tabu	interval	3	D:\RST\Gene100_2.csv	91	0.374000072	5	1	p`= 0.04	P = 0.25	[LUT,GRMZM2G300348]
tabu	interval	3	D:\RST\Gene100_3.csv	87	0.382000208	8	1	p`= 0.07	P = 0.25	[LUT,GRMZM2G300348]
tabu	interval	3	D:\RST\Gene100_4.csv	89	0.413999796	5	1	p`= 0.04	P = 0.25	[LUT,GRMZM2G300348]
tabu	interval	3	D:\RST\Gene100_5.csv	95	0.463000059	7	1	p`= 0.06	P = 0.25	[LUT,GRMZM2G300348]
tabu	interval	3	D:\RST\Gene100_6.csv	93	0.411000013	6	1	p`= 0.05	P = 0.25	[LUT,GRMZM2G300348]
tabu	interval	3	D:\RST\Gene100_7.csv	93	0.447000027	6	1	p`= 0.05	P = 0.25	[LUT,GRMZM2G300348]
tabu	interval	3	D:\RST\Gene100_8.csv	95	0.411999941	6	1	p`= 0.05	P = 0.25	[LUT,GRMZM2G300348]
tabu	interval	3	D:\RST\Gene100_9.csv	85	0.352999926	5	1	p`= 0.04	P = 0.25	[LUT,GRMZM2G300348]
tabu	interval	3	D:\RST\Gene100_10.csv	91	0.453999996	6	1	p`= 0.05	P = 0.25	[LUT,GRMZM2G300348]
tabu	interval	2	D:\RST\Gene100_1.csv	197	0.711999893	22	4	p`= 0.18	P = 1	[LUT,GRMZM2G012966] [GRMZM2G152135,BC] [BC,GRMZM2G012966] [GRMZM2G152135,ZEA]
tabu	interval	2	D:\RST\Gene100_2.csv	193	0.765999794	11	3	p`= 0.08	P = 0.75	[GRMZM2G012966,LUT] [GRMZM2G152135,BC] [BC,GRMZM2G012966]
tabu	interval	2	D:\RST\Gene100_3.csv	186	0.733999968	15	3	p`= 0.12	P = 0.75	[GRMZM2G152135,BC] [BC,GRMZM2G012966] [GRMZM2G012966,LUT]
tabu	interval	2	D:\RST\Gene100_4.csv	189	0.664000034	13	4	p`= 0.09	P = 1	[GRMZM2G152135,BC] [BC,GRMZM2G012966] [GRMZM2G152135,ZEA] [GRMZM2G012966,LUT]
tabu	interval	2	D:\RST\Gene100_5.csv	197	0.736999989	17	4	p`= 0.13	P = 1	[LUT,GRMZM2G012966] [GRMZM2G152135,BC] [BC,GRMZM2G012966] [GRMZM2G300348,ZEA]
tabu	interval	2	D:\RST\Gene100_6.csv	193	0.683000088	10	2	p`= 0.08	P = 0.5	[LUT,GRMZM2G012966] [GRMZM2G152135,BC]
tabu	interval	2	D:\RST\Gene100_7.csv	191	0.772000074	18	4	p`= 0.14	P = 1	[LUT,GRMZM2G012966] [GRMZM2G152135,BC] [BC,GRMZM2G012966] [GRMZM2G152135,ZEA]
tabu	interval	2	D:\RST\Gene100_8.csv	194	0.784000158	17	3	p`= 0.14	P = 0.75	[GRMZM2G012966,LUT] [BC,GRMZM2G012966] [GRMZM2G152135,BC]
tabu	interval	2	D:\RST\Gene100_9.csv	192	0.686000109	15	4	p`= 0.11	P = 1	[LUT,GRMZM2G012966] [GRMZM2G152135,BC] [BC,GRMZM2G012966] [ZEA,GRMZM2G300348]
tabu	interval	2	D:\RST\Gene100_10.csv	196	0.763999939	14	4	p`= 0.1	P = 1	[LUT,GRMZM2G012966] [GRMZM2G152135,BC] [ZEA,GRMZM2G300348] [GRMZM2G152135,ZEA]
fastiamb	interval	6	D:\RST\Gene100_1.csv	92	0.368999958	4	0	p`= 0.04	P = 0	NULL
fastiamb	interval	6	D:\RST\Gene100_2.csv	86	0.2900002	4	0	p`= 0.04	P = 0	NULL
fastiamb	interval	6	D:\RST\Gene100_3.csv	80	0.49000001	4	0	p`= 0.04	P = 0	NULL
fastiamb	interval	6	D:\RST\Gene100_4.csv	96	0.381000042	4	0	p`= 0.04	P = 0	NULL
fastiamb	interval	6	D:\RST\Gene100_5.csv	86	1.035000086	4	0	p`= 0.04	P = 0	NULL
fastiamb	interval	6	D:\RST\Gene100_6.csv	80	0.254999876	4	0	p`= 0.04	P = 0	NULL
fastiamb	interval	6	D:\RST\Gene100_7.csv	88	0.413000107	4	0	p`= 0.04	P = 0	NULL
fastiamb	interval	6	D:\RST\Gene100_8.csv	98	0.333000183	4	0	p`= 0.04	P = 0	NULL
fastiamb	interval	6	D:\RST\Gene100_9.csv	100	0.88269999	4	0	p`= 0.04	P = 0	NULL
fastiamb	interval	6	D:\RST\Gene100_10.csv	90	0.477999926	4	0	p`= 0.04	P = 0	NULL
fastiamb	interval	5	D:\RST\Gene100_1.csv	90	0.323999882	4	0	p`= 0.04	P = 0	NULL
fastiamb	interval	5	D:\RST\Gene100_2.csv	80	0.236999989	4	0	p`= 0.04	P = 0	NULL
fastiamb	interval	5	D:\RST\Gene100_3.csv	88	1.953000069	4	0	p`= 0.04	P = 0	NULL
fastiamb	interval	5	D:\RST\Gene100_4.csv	86	0.240999937	4	0	p`= 0.04	P = 0	NULL
fastiamb	interval	5	D:\RST\Gene100_5.csv	90	0.285000086	4	0	p`= 0.04	P = 0	NULL
fastiamb	interval	5	D:\RST\Gene100_6.csv	94	0.227999926	4	0	p`= 0.04	P = 0	NULL
fastiamb	interval	5	D:\RST\Gene100_7.csv	94	1.996000051	4	0	p`= 0.04	P = 0	NULL
fastiamb	interval	5	D:\RST\Gene100_8.csv	96	0.320999861	4	0	p`= 0.04	P = 0	NULL
fastiamb	interval	5	D:\RST\Gene100_9.csv	104	0.648999929	4	0	p`= 0.04	P = 0	NULL
fastiamb	interval	5	D:\RST\Gene100_10.csv	94	0.291000128	4	0	p`= 0.04	P = 0	NULL
fastiamb	interval	4	D:\RST\Gene100_1.csv	81	0.221999884	4	0	p`= 0.04	P = 0	NULL
fastiamb	interval	4	D:\RST\Gene100_2.csv	106	0.236999989	4	0	p`= 0.04	P = 0	NULL
fastiamb	interval	4	D:\RST\Gene100_3.csv	86	0.424999952	4	0	p`= 0.04	P = 0	NULL
fastiamb	interval	4	D:\RST\Gene100_4.csv	90	0.234999895	4	0	p`= 0.04	P = 0	NULL
fastiamb	interval	4	D:\RST\Gene100_5.csv	88	0.225000143	4	0	p`= 0.04	P = 0	NULL
fastiamb	interval	4	D:\RST\Gene100_6.csv	74	0.221999884	4	0	p`= 0.04	P = 0	NULL
fastiamb	interval	4	D:\RST\Gene100_7.csv	94	0.21600008	4	0	p`= 0.04	P = 0	NULL
fastiamb	interval	4	D:\RST\Gene100_8.csv	84	0.243999958	4	0	p`= 0.04	P = 0	NULL
fastiamb	interval	4	D:\RST\Gene100_9.csv	85	0.231999874	4	0	p`= 0.04	P = 0	NULL
fastiamb	interval	4	D:\RST\Gene100_10.csv	84	0.276000023	4	0	p`= 0.04	P = 0	NULL
fastiamb	interval	3	D:\RST\Gene100_1.csv	130	0.366999865	6	2	p`= 0.04	P = 0.5	[LUT,GRMZM2G300348] [GRMZM2G300348,LUT]
fastiamb	interval	3	D:\RST\Gene100_2.csv	125	0.292999983	4	1	p`= 0.03	P = 0.25	[GRMZM2G300348,LUT]
fastiamb	interval	3	D:\RST\Gene100_3.csv	136	0.471999884	6	0	p`= 0.06	P = 0	NULL
fastiamb	interval	3	D:\RST\Gene100_4.csv	127	0.26699996	7	2	p`= 0.05	P = 0.5	[LUT,GRMZM2G300348] [GRMZM2G300348,LUT]
fastiamb	interval	3	D:\RST\Gene100_5.csv	133	0.259000063	6	2	p`= 0.04	P = 0.5	[LUT,GRMZM2G300348] [GRMZM2G300348,LUT]
fastiamb	interval	3	D:\RST\Gene100_6.csv	128	0.272000074	6	2	p`= 0.04	P = 0.5	[LUT,GRMZM2G300348] [GRMZM2G300348,LUT]
fastiamb	interval	3	D:\RST\Gene100_7.csv	151	0.320000172	8	2	p`= 0.06	P = 0.5	[LUT,GRMZM2G300348] [GRMZM2G300348,LUT]
fastiamb	interval	3	D:\RST\Gene100_8.csv	98	0.303999901	6	2	p`= 0.04	P = 0.5	[LUT,GRMZM2G300348] [GRMZM2G300348,LUT]
fastiamb	interval	3	D:\RST\Gene100_9.csv	100	1.108999968	4	1	p`= 0.03	P = 0.25	[GRMZM2G300348,LUT]
fastiamb	interval	3	D:\RST\Gene100_10.csv	109	0.314999819	6	2	p`= 0.04	P = 0.5	[LUT,GRMZM2G300348] [GRMZM2G300348,LUT]
fastiamb	interval	2	D:\RST\Gene100_1.csv	138	0.426000118	13	4	p`= 0.09	P = 1	[ZEA,GRMZM2G152135] [ZEA,GRMZM2G300348] [GRMZM2G012966,LUT] [GRMZM2G152135,BC]
fastiamb	interval	2	D:\RST\Gene100_2.csv	156	0.444000006	8	3	p`= 0.05	P = 0.75	[LUT,GRMZM2G012966] [BC,GRMZM2G012966] [GRMZM2G152135,BC]
fastiamb	interval	2	D:\RST\Gene100_3.csv	141	0.428999901	11	4	p`= 0.07	P = 1	[LUT,GRMZM2G012966] [ZEA,GRMZM2G152135] [BC,GRMZM2G012966] [GRMZM2G152135,BC]
fastiamb	interval	2	D:\RST\Gene100_4.csv	158	0.414000034	13	4	p`= 0.09	P = 1	[ZEA,GRMZM2G152135] [ZEA,GRMZM2G300348] [GRMZM2G012966,LUT] [GRMZM2G012966,BC]
fastiamb	interval	2	D:\RST\Gene100_5.csv	140	0.450000048	10	3	p`= 0.07	P = 0.75	[LUT,GRMZM2G012966] [BC,GRMZM2G012966] [GRMZM2G152135,BC]
fastiamb	interval	2	D:\RST\Gene100_6.csv	136	0.414000034	8	3	p`= 0.05	P = 0.75	[LUT,GRMZM2G012966] [BC,GRMZM2G012966] [GRMZM2G152135,ZEA]
fastiamb	interval	2	D:\RST\Gene100_7.csv	146	0.424999952	9	4	p`= 0.05	P = 1	[LUT,GRMZM2G012966] [ZEA,GRMZM2G300348] [BC,GRMZM2G012966] [GRMZM2G152135,BC]
fastiamb	interval	2	D:\RST\Gene100_8.csv	140	0.398000002	9	3	p`= 0.06	P = 0.75	[ZEA,GRMZM2G152135] [GRMZM2G012966,LUT] [GRMZM2G300348,ZEA]
fastiamb	interval	2	D:\RST\Gene100_9.csv	157	0.509000063	15	7	p`= 0.08	P = 1.75	[LUT,GRMZM2G012966] [ZEA,GRMZM2G152135] [ZEA,GRMZM2G300348] [BC,GRMZM2G012966] [GRMZM2G152135,ZEA] [GRMZM2G152135,BC] [GRMZM2G300348,ZEA]
fastiamb	interval	2	D:\RST\Gene100_10.csv	162	0.83100009	10	5	p`= 0.05	P = 1.25	[LUT,GRMZM2G012966] [ZEA,GRMZM2G300348] [BC,GRMZM2G012966] [GRMZM2G152135,ZEA] [GRMZM2G152135,BC]
interiamb	interval	6	D:\RST\Gene100_1.csv	90	1.235999823	4	0	p`= 0.04	P = 0	NULL
interiamb	interval	6	D:\RST\Gene100_2.csv	82	0.319999933	4	0	p`= 0.04	P = 0	NULL
interiamb	interval	6	D:\RST\Gene100_3.csv	80	1.167999983	4	0	p`= 0.04	P = 0	NULL
interiamb	interval	6	D:\RST\Gene100_4.csv	96	0.43200016	4	0	p`= 0.04	P = 0	NULL
interiamb	interval	6	D:\RST\Gene100_5.csv	84	1.121999979	4	0	p`= 0.04	P = 0	NULL
interiamb	interval	6	D:\RST\Gene100_6.csv	80	0.303999901	4	0	p`= 0.04	P = 0	NULL
interiamb	interval	6	D:\RST\Gene100_7.csv	82	0.394000053	4	0	p`= 0.04	P = 0	NULL
interiamb	interval	6	D:\RST\Gene100_8.csv	96	0.325999975	4	0	p`= 0.04	P = 0	NULL
interiamb	interval	6	D:\RST\Gene100_9.csv	94	0.932099986	4	0	p`= 0.04	P = 0	NULL
interiamb	interval	6	D:\RST\Gene100_10.csv	86	0.542999983	4	0	p`= 0.04	P = 0	NULL
interiamb	interval	5	D:\RST\Gene100_1.csv	84	1.076999903	4	0	p`= 0.04	P = 0	NULL
interiamb	interval	5	D:\RST\Gene100_2.csv	90	0.512000084	4	0	p`= 0.04	P = 0	NULL
interiamb	interval	5	D:\RST\Gene100_3.csv	92	0.147049999	4	0	p`= 0.04	P = 0	NULL
interiamb	interval	5	D:\RST\Gene100_4.csv	98	0.328999996	4	0	p`= 0.04	P = 0	NULL
interiamb	interval	5	D:\RST\Gene100_5.csv	92	0.389999866	4	0	p`= 0.04	P = 0	NULL
interiamb	interval	5	D:\RST\Gene100_6.csv	88	0.299999952	4	0	p`= 0.04	P = 0	NULL
interiamb	interval	5	D:\RST\Gene100_7.csv	94	3.50999999	4	0	p`= 0.04	P = 0	NULL
interiamb	interval	5	D:\RST\Gene100_8.csv	104	2.025000095	4	0	p`= 0.04	P = 0	NULL
interiamb	interval	5	D:\RST\Gene100_9.csv	96	0.165550001	4	0	p`= 0.04	P = 0	NULL
interiamb	interval	5	D:\RST\Gene100_10.csv	90	0.339999914	4	0	p`= 0.04	P = 0	NULL
interiamb	interval	4	D:\RST\Gene100_1.csv	98	1.471999884	10	2	p`= 0.08	P = 0.5	[BC,GRMZM2G152135] [GRMZM2G152135,BC]
interiamb	interval	4	D:\RST\Gene100_2.csv	146	0.486999989	10	2	p`= 0.08	P = 0.5	[BC,GRMZM2G152135] [GRMZM2G152135,BC]
interiamb	interval	4	D:\RST\Gene100_3.csv	119	0.275280001	8	0	p`= 0.08	P = 0	NULL
interiamb	interval	4	D:\RST\Gene100_4.csv	147	0.467999935	10	2	p`= 0.08	P = 0.5	[BC,GRMZM2G152135] [GRMZM2G152135,BC]
interiamb	interval	4	D:\RST\Gene100_5.csv	136	0.409000158	10	2	p`= 0.08	P = 0.5	[BC,GRMZM2G152135] [GRMZM2G152135,BC]
interiamb	interval	4	D:\RST\Gene100_6.csv	124	0.380000114	10	2	p`= 0.08	P = 0.5	[BC,GRMZM2G152135] [GRMZM2G152135,BC]
interiamb	interval	4	D:\RST\Gene100_7.csv	130	0.374000072	8	0	p`= 0.08	P = 0	NULL
interiamb	interval	4	D:\RST\Gene100_8.csv	136	0.496000051	10	2	p`= 0.08	P = 0.5	[BC,GRMZM2G152135] [GRMZM2G152135,BC]
interiamb	interval	4	D:\RST\Gene100_9.csv	127	0.69900012	10	2	p`= 0.08	P = 0.5	[BC,GRMZM2G152135] [GRMZM2G152135,BC]
interiamb	interval	4	D:\RST\Gene100_10.csv	128	0.648999929	8	2	p`= 0.06	P = 0.5	[BC,GRMZM2G152135] [GRMZM2G152135,BC]
interiamb	interval	3	D:\RST\Gene100_1.csv	133	0.499000072	5	0	p`= 0.05	P = 0	NULL
interiamb	interval	3	D:\RST\Gene100_2.csv	107	0.467999935	7	0	p`= 0.07	P = 0	NULL
interiamb	interval	3	D:\RST\Gene100_3.csv	111	0.614000082	10	0	p`= 0.1	P = 0	NULL
interiamb	interval	3	D:\RST\Gene100_4.csv	104	0.381000042	8	0	p`= 0.08	P = 0	NULL
interiamb	interval	3	D:\RST\Gene100_5.csv	105	0.397000074	6	0	p`= 0.06	P = 0	NULL
interiamb	interval	3	D:\RST\Gene100_6.csv	114	0.394999981	6	0	p`= 0.06	P = 0	NULL
interiamb	interval	3	D:\RST\Gene100_7.csv	112	0.401000023	10	2	p`= 0.08	P = 0.5	[LUT,GRMZM2G300348] [GRMZM2G300348,LUT]
interiamb	interval	3	D:\RST\Gene100_8.csv	99	0.388000011	6	0	p`= 0.06	P = 0	NULL
interiamb	interval	3	D:\RST\Gene100_9.csv	118	0.464999914	7	0	p`= 0.07	P = 0	NULL
interiamb	interval	3	D:\RST\Gene100_10.csv	131	0.476999998	8	0	p`= 0.08	P = 0	NULL
interiamb	interval	2	D:\RST\Gene100_1.csv	128	0.799000025	13	4	p`= 0.09	P = 1	[ZEA,GRMZM2G152135] [AC,GRMZM2G012966] [BC,GRMZM2G012966] [GRMZM2G012966,AC]
interiamb	interval	2	D:\RST\Gene100_2.csv	154	0.914999962	8	2	p`= 0.06	P = 0.5	[GRMZM2G012966,BC] [GRMZM2G152135,BC]
interiamb	interval	2	D:\RST\Gene100_3.csv	127	0.868999958	11	3	p`= 0.08	P = 0.75	[GRMZM2G012966,BC] [GRMZM2G152135,BC] [GRMZM2G300348,ZEA]
interiamb	interval	2	D:\RST\Gene100_4.csv	136	0.822000027	11	5	p`= 0.06	P = 1.25	[ZEA,GRMZM2G300348] [BC,GRMZM2G012966] [GRMZM2G012966,LUT] [GRMZM2G012966,BC] [GRMZM2G152135,BC]
interiamb	interval	2	D:\RST\Gene100_5.csv	134	0.822000027	10	4	p`= 0.06	P = 1	[ZEA,GRMZM2G152135] [BC,GRMZM2G152135] [GRMZM2G012966,BC] [GRMZM2G152135,ZEA]
interiamb	interval	2	D:\RST\Gene100_6.csv	140	0.834000111	8	2	p`= 0.06	P = 0.5	[ZEA,GRMZM2G300348] [GRMZM2G300348,ZEA]
interiamb	interval	2	D:\RST\Gene100_7.csv	142	0.825999975	10	5	p`= 0.05	P = 1.25	[LUT,GRMZM2G012966] [BC,GRMZM2G012966] [GRMZM2G012966,LUT] [GRMZM2G152135,ZEA] [GRMZM2G152135,BC]
interiamb	interval	2	D:\RST\Gene100_8.csv	134	0.817000151	7	1	p`= 0.06	P = 0.25	[ZEA,GRMZM2G300348]
interiamb	interval	2	D:\RST\Gene100_9.csv	149	0.798000097	11	5	p`= 0.06	P = 1.25	[LUT,GRMZM2G012966] [ZEA,GRMZM2G300348] [BC,GRMZM2G012966] [BC,GRMZM2G152135] [GRMZM2G012966,LUT]
interiamb	interval	2	D:\RST\Gene100_10.csv	139	0.896999836	9	4	p`= 0.05	P = 1	[LUT,GRMZM2G012966] [BC,GRMZM2G012966] [GRMZM2G012966,LUT] [GRMZM2G152135,ZEA]
mmhc	interval	6	D:\RST\Gene100_1.csv	3	0.493999958	0	0	p`= 0	P = 0	NULL
mmhc	interval	6	D:\RST\Gene100_2.csv	1	0.510999918	0	0	p`= 0	P = 0	NULL
mmhc	interval	6	D:\RST\Gene100_3.csv	1	0.53399992	0	0	p`= 0	P = 0	NULL
mmhc	interval	6	D:\RST\Gene100_4.csv	2	0.479000092	0	0	p`= 0	P = 0	NULL
mmhc	interval	6	D:\RST\Gene100_5.csv	3	0.461999893	0	0	p`= 0	P = 0	NULL
mmhc	interval	6	D:\RST\Gene100_6.csv	1	0.480999947	0	0	p`= 0	P = 0	NULL
mmhc	interval	6	D:\RST\Gene100_7.csv	0	0.50994134	0	0	p`= 0	P = 0	NULL
mmhc	interval	6	D:\RST\Gene100_8.csv	2	0.460000038	0	0	p`= 0	P = 0	NULL
mmhc	interval	6	D:\RST\Gene100_9.csv	1	0.476000071	0	0	p`= 0	P = 0	NULL
mmhc	interval	6	D:\RST\Gene100_10.csv	3	0.483999968	0	0	p`= 0	P = 0	NULL
mmhc	interval	5	D:\RST\Gene100_1.csv	3	0.476999998	1	0	p`= 0.01	P = 0	NULL
mmhc	interval	5	D:\RST\Gene100_2.csv	9	0.479000092	1	0	p`= 0.01	P = 0	NULL
mmhc	interval	5	D:\RST\Gene100_3.csv	3	0.49000001	1	0	p`= 0.01	P = 0	NULL
mmhc	interval	5	D:\RST\Gene100_4.csv	9	0.490999937	1	0	p`= 0.01	P = 0	NULL
mmhc	interval	5	D:\RST\Gene100_5.csv	6	0.488000154	1	0	p`= 0.01	P = 0	NULL
mmhc	interval	5	D:\RST\Gene100_6.csv	6	0.479999781	1	0	p`= 0.01	P = 0	NULL
mmhc	interval	5	D:\RST\Gene100_7.csv	4	0.473999977	1	0	p`= 0.01	P = 0	NULL
mmhc	interval	5	D:\RST\Gene100_8.csv	4	0.487999916	1	0	p`= 0.01	P = 0	NULL
mmhc	interval	5	D:\RST\Gene100_9.csv	5	0.473999977	1	0	p`= 0.01	P = 0	NULL
mmhc	interval	5	D:\RST\Gene100_10.csv	5	0.501000166	1	0	p`= 0.01	P = 0	NULL
mmhc	interval	4	D:\RST\Gene100_1.csv	10	0.498999834	3	0	p`= 0.03	P = 0	NULL
mmhc	interval	4	D:\RST\Gene100_2.csv	15	0.507000208	3	0	p`= 0.03	P = 0	NULL
mmhc	interval	4	D:\RST\Gene100_3.csv	7	0.491000175	3	0	p`= 0.03	P = 0	NULL
mmhc	interval	4	D:\RST\Gene100_4.csv	15	0.553999901	3	0	p`= 0.03	P = 0	NULL
mmhc	interval	4	D:\RST\Gene100_5.csv	7	0.49000001	3	0	p`= 0.03	P = 0	NULL
mmhc	interval	4	D:\RST\Gene100_6.csv	10	0.500999928	3	0	p`= 0.03	P = 0	NULL
mmhc	interval	4	D:\RST\Gene100_7.csv	7	0.50999999	3	0	p`= 0.03	P = 0	NULL
mmhc	interval	4	D:\RST\Gene100_8.csv	9	0.527999878	3	0	p`= 0.03	P = 0	NULL
mmhc	interval	4	D:\RST\Gene100_9.csv	14	0.510999918	3	0	p`= 0.03	P = 0	NULL
mmhc	interval	4	D:\RST\Gene100_10.csv	7	0.513999939	3	0	p`= 0.03	P = 0	NULL
mmhc	interval	3	D:\RST\Gene100_1.csv	23	0.565000057	4	0	p`= 0.04	P = 0	NULL
mmhc	interval	3	D:\RST\Gene100_2.csv	31	0.536000013	4	0	p`= 0.04	P = 0	NULL
mmhc	interval	3	D:\RST\Gene100_3.csv	24	0.538000107	4	0	p`= 0.04	P = 0	NULL
mmhc	interval	3	D:\RST\Gene100_4.csv	38	0.554999828	4	0	p`= 0.04	P = 0	NULL
mmhc	interval	3	D:\RST\Gene100_5.csv	30	0.519999981	4	0	p`= 0.04	P = 0	NULL
mmhc	interval	3	D:\RST\Gene100_6.csv	28	0.526000023	4	0	p`= 0.04	P = 0	NULL
mmhc	interval	3	D:\RST\Gene100_7.csv	34	0.541000128	4	0	p`= 0.04	P = 0	NULL
mmhc	interval	3	D:\RST\Gene100_8.csv	27	0.555999994	4	0	p`= 0.04	P = 0	NULL
mmhc	interval	3	D:\RST\Gene100_9.csv	24	0.525000095	4	0	p`= 0.04	P = 0	NULL
mmhc	interval	3	D:\RST\Gene100_10.csv	24	0.563999891	4	0	p`= 0.04	P = 0	NULL
mmhc	interval	2	D:\RST\Gene100_1.csv	89	0.611000061	11	4	p`= 0.07	P = 1	[BC,GRMZM2G012966] [GRMZM2G012966,LUT] [GRMZM2G152135,ZEA] [ZEA,GRMZM2G300348]
mmhc	interval	2	D:\RST\Gene100_2.csv	83	0.595999956	5	2	p`= 0.03	P = 0.5	[BC,GRMZM2G012966] [GRMZM2G012966,LUT]
mmhc	interval	2	D:\RST\Gene100_3.csv	92	0.621000051	10	4	p`= 0.06	P = 1	[BC,GRMZM2G012966] [GRMZM2G012966,LUT] [ZEA,GRMZM2G152135] [ZEA,GRMZM2G300348]
mmhc	interval	2	D:\RST\Gene100_4.csv	85	0.611000061	7	3	p`= 0.04	P = 0.75	[BC,GRMZM2G012966] [GRMZM2G012966,LUT] [ZEA,GRMZM2G300348]
mmhc	interval	2	D:\RST\Gene100_5.csv	79	0.600999832	7	3	p`= 0.04	P = 0.75	[BC,GRMZM2G012966] [GRMZM2G012966,LUT] [ZEA,GRMZM2G300348]
mmhc	interval	2	D:\RST\Gene100_6.csv	82	0.620000124	5	2	p`= 0.03	P = 0.5	[BC,GRMZM2G012966] [GRMZM2G012966,LUT]
mmhc	interval	2	D:\RST\Gene100_7.csv	71	0.626000166	7	3	p`= 0.04	P = 0.75	[BC,GRMZM2G012966] [GRMZM2G012966,LUT] [ZEA,GRMZM2G300348]
mmhc	interval	2	D:\RST\Gene100_8.csv	87	0.625999928	9	3	p`= 0.06	P = 0.75	[BC,GRMZM2G012966] [GRMZM2G152135,ZEA] [ZEA,GRMZM2G300348]
mmhc	interval	2	D:\RST\Gene100_9.csv	84	0.601000071	12	5	p`= 0.07	P = 1.25	[GRMZM2G152135,BC] [BC,GRMZM2G012966] [GRMZM2G012966,LUT] [ZEA,GRMZM2G152135] [ZEA,GRMZM2G300348]
mmhc	interval	2	D:\RST\Gene100_10.csv	80	0.644000053	7	3	p`= 0.04	P = 0.75	[BC,GRMZM2G012966] [GRMZM2G012966,LUT] [ZEA,GRMZM2G300348]
