# Supplementary material for: Verification of Three-Phase Dependency Analysis Bayesian Network Learning Method for Maize Carotenoid Gene Mining
Source: Biomed Res Int. 2017 Jul 30;2017:1813494. doi: 10.1155/2017/1813494 (PMC5554554; doi:10.1155/2017/1813494)
Supplement: Supplementary file 1 — The experiment data 1 of 109 nodes, the experiment data 2 of 109 nodes, and so on are shown here. [file 1813494.f1.zip › Supplementary material/9 Kinds of methods-Quantile.csv]

Methods	Discretization methods	Discretization value	Input	All the edge number	Time(s)	Number of edges about 5 component traits	Number of edges between 4 genes and 5 component traits	Ratio of other 100 genes	Ratio of 4 genes	Edges between 4 genes and 5 component
gs	quantile	5	D:\RST\Gene100_1.csv	8	0.822999954	6	0	p`= 0.06	P = 0	NULL
gs	quantile	5	D:\RST\Gene100_2.csv	12	0.819999933	6	0	p`= 0.06	P = 0	NULL
gs	quantile	5	D:\RST\Gene100_3.csv	6	0.782000065	6	0	p`= 0.06	P = 0	NULL
gs	quantile	5	D:\RST\Gene100_4.csv	10	0.818000078	6	0	p`= 0.06	P = 0	NULL
gs	quantile	5	D:\RST\Gene100_5.csv	10	0.745999813	6	0	p`= 0.06	P = 0	NULL
gs	quantile	5	D:\RST\Gene100_6.csv	10	0.787999868	6	0	p`= 0.06	P = 0	NULL
gs	quantile	5	D:\RST\Gene100_7.csv	6	0.746000051	6	0	p`= 0.06	P = 0	NULL
gs	quantile	5	D:\RST\Gene100_8.csv	8	0.802000046	6	0	p`= 0.06	P = 0	NULL
gs	quantile	5	D:\RST\Gene100_9.csv	12	0.802000046	6	0	p`= 0.06	P = 0	NULL
gs	quantile	5	D:\RST\Gene100_10.csv	10	0.778000116	6	0	p`= 0.06	P = 0	NULL
gs	quantile	4	D:\RST\Gene100_1.csv	8	1.06099987	6	1	p`= 0.05	P = 0.25	[GRMZM2G152135,BC]
gs	quantile	4	D:\RST\Gene100_2.csv	8	1.126999855	6	1	p`= 0.05	P = 0.25	[GRMZM2G152135,BC]
gs	quantile	4	D:\RST\Gene100_3.csv	8	1.072999954	6	1	p`= 0.05	P = 0.25	[GRMZM2G152135,BC]
gs	quantile	4	D:\RST\Gene100_4.csv	10	1.069000006	6	1	p`= 0.05	P = 0.25	[GRMZM2G152135,BC]
gs	quantile	4	D:\RST\Gene100_5.csv	8	1.052000046	6	1	p`= 0.05	P = 0.25	[GRMZM2G152135,BC]
gs	quantile	4	D:\RST\Gene100_6.csv	8	0.99000001	6	1	p`= 0.05	P = 0.25	[GRMZM2G152135,BC]
gs	quantile	4	D:\RST\Gene100_7.csv	10	1.036000013	6	1	p`= 0.05	P = 0.25	[GRMZM2G152135,BC]
gs	quantile	4	D:\RST\Gene100_8.csv	10	1.051999807	6	1	p`= 0.05	P = 0.25	[GRMZM2G152135,BC]
gs	quantile	4	D:\RST\Gene100_9.csv	14	1.04700017	6	1	p`= 0.05	P = 0.25	[GRMZM2G152135,BC]
gs	quantile	4	D:\RST\Gene100_10.csv	8	1.263000011	6	1	p`= 0.05	P = 0.25	[GRMZM2G152135,BC]
gs	quantile	3	D:\RST\Gene100_1.csv	15	1.101000071	9	3	p`= 0.06	P = 0.75	[BC,GRMZM2G012966] [GRMZM2G012966,AC] [GRMZM2G012966,BC]
gs	quantile	3	D:\RST\Gene100_2.csv	22	1.117000103	9	1	p`= 0.08	P = 0.25	[AC,GRMZM2G012966]
gs	quantile	3	D:\RST\Gene100_3.csv	26	1.113999844	10	2	p`= 0.08	P = 0.5	[BC,GRMZM2G012966] [GRMZM2G012966,BC]
gs	quantile	3	D:\RST\Gene100_4.csv	17	1.147000074	8	2	p`= 0.06	P = 0.5	[AC,GRMZM2G012966] [GRMZM2G012966,BC]
gs	quantile	3	D:\RST\Gene100_5.csv	22	1.161999941	10	2	p`= 0.08	P = 0.5	[BC,GRMZM2G012966] [GRMZM2G012966,BC]
gs	quantile	3	D:\RST\Gene100_6.csv	22	1.121000051	12	3	p`= 0.09	P = 0.75	[BC,GRMZM2G012966] [GRMZM2G012966,AC] [GRMZM2G012966,BC]
gs	quantile	3	D:\RST\Gene100_7.csv	18	1.150000095	8	1	p`= 0.07	P = 0.25	[GRMZM2G012966,BC]
gs	quantile	3	D:\RST\Gene100_8.csv	26	1.092000008	10	0	p`= 0.1	P = 0	NULL
gs	quantile	3	D:\RST\Gene100_9.csv	22	1.134000063	12	4	p`= 0.08	P = 1	[AC,GRMZM2G012966] [BC,GRMZM2G012966] [GRMZM2G012966,AC] [GRMZM2G012966,BC]
gs	quantile	3	D:\RST\Gene100_10.csv	18	1.113000154	10	2	p`= 0.08	P = 0.5	[BC,GRMZM2G012966] [GRMZM2G012966,BC]
gs	quantile	2	D:\RST\Gene100_1.csv	67	1.464999914	13	6	p`= 0.07	P = 1.5	[LUT,GRMZM2G012966] [ZEA,GRMZM2G152135] [BC,GRMZM2G012966] [GRMZM2G012966,LUT] [GRMZM2G152135,ZEA] [GRMZM2G152135,BC]
gs	quantile	2	D:\RST\Gene100_2.csv	44	1.428999901	9	4	p`= 0.05	P = 1	[ZEA,GRMZM2G152135] [GRMZM2G012966,BC] [GRMZM2G152135,ZEA] [GRMZM2G152135,BC]
gs	quantile	2	D:\RST\Gene100_3.csv	55	1.24000001	11	5	p`= 0.06	P = 1.25	[LUT,GRMZM2G012966] [ZEA,GRMZM2G152135] [BC,GRMZM2G012966] [GRMZM2G152135,ZEA] [GRMZM2G152135,BC]
gs	quantile	2	D:\RST\Gene100_4.csv	50	1.43200016	14	4	p`= 0.1	P = 1	[LUT,GRMZM2G012966] [BC,GRMZM2G012966] [GRMZM2G012966,LUT] [GRMZM2G012966,BC]
gs	quantile	2	D:\RST\Gene100_5.csv	58	1.351999998	14	6	p`= 0.08	P = 1.5	[LUT,GRMZM2G012966] [AC,GRMZM2G152135] [BC,GRMZM2G012966] [GRMZM2G012966,LUT] [GRMZM2G012966,BC] [GRMZM2G152135,AC]
gs	quantile	2	D:\RST\Gene100_6.csv	56	1.356999874	13	7	p`= 0.06	P = 1.75	[LUT,GRMZM2G012966] [ZEA,GRMZM2G152135] [AC,GRMZM2G152135] [BC,GRMZM2G012966] [GRMZM2G152135,ZEA] [GRMZM2G152135,AC] [GRMZM2G152135,BC]
gs	quantile	2	D:\RST\Gene100_7.csv	53	1.376000166	10	5	p`= 0.05	P = 1.25	[ZEA,GRMZM2G152135] [BC,GRMZM2G152135] [GRMZM2G012966,LUT] [GRMZM2G012966,BC] [GRMZM2G152135,ZEA]
gs	quantile	2	D:\RST\Gene100_8.csv	54	1.80099988	11	5	p`= 0.06	P = 1.25	[LUT,GRMZM2G012966] [ZEA,GRMZM2G152135] [BC,GRMZM2G012966] [GRMZM2G152135,ZEA] [GRMZM2G152135,BC]
gs	quantile	2	D:\RST\Gene100_9.csv	60	1.644999981	10	4	p`= 0.06	P = 1	[Bcry,GRMZM2G012966] [GRMZM2G012966,LUT] [GRMZM2G012966,Bcry] [GRMZM2G152135,BC]
gs	quantile	2	D:\RST\Gene100_10.csv	60	1.52699995	11	4	p`= 0.07	P = 1	[ZEA,GRMZM2G152135] [GRMZM2G012966,BC] [GRMZM2G152135,ZEA] [GRMZM2G152135,BC]
hc	quantile	5	D:\RST\Gene100_1.csv	28	0.22300005	2	0	p`= 0.02	P = 0	NULL
hc	quantile	5	D:\RST\Gene100_2.csv	34	0.242000103	2	0	p`= 0.02	P = 0	NULL
hc	quantile	5	D:\RST\Gene100_3.csv	18	0.188999891	2	0	p`= 0.02	P = 0	NULL
hc	quantile	5	D:\RST\Gene100_4.csv	26	0.203999996	2	0	p`= 0.02	P = 0	NULL
hc	quantile	5	D:\RST\Gene100_5.csv	31	0.207999945	2	0	p`= 0.02	P = 0	NULL
hc	quantile	5	D:\RST\Gene100_6.csv	25	0.198999882	2	0	p`= 0.02	P = 0	NULL
hc	quantile	5	D:\RST\Gene100_7.csv	27	0.200999975	2	0	p`= 0.02	P = 0	NULL
hc	quantile	5	D:\RST\Gene100_8.csv	23	0.198999882	2	0	p`= 0.02	P = 0	NULL
hc	quantile	5	D:\RST\Gene100_9.csv	28	0.187000036	2	0	p`= 0.02	P = 0	NULL
hc	quantile	5	D:\RST\Gene100_10.csv	31	0.212000132	2	0	p`= 0.02	P = 0	NULL
hc	quantile	4	D:\RST\Gene100_1.csv	52	0.249000072	3	0	p`= 0.03	P = 0	NULL
hc	quantile	4	D:\RST\Gene100_2.csv	49	0.242999792	3	0	p`= 0.03	P = 0	NULL
hc	quantile	4	D:\RST\Gene100_3.csv	44	0.229000092	3	0	p`= 0.03	P = 0	NULL
hc	quantile	4	D:\RST\Gene100_4.csv	59	0.269999981	3	0	p`= 0.03	P = 0	NULL
hc	quantile	4	D:\RST\Gene100_5.csv	54	0.250999928	3	0	p`= 0.03	P = 0	NULL
hc	quantile	4	D:\RST\Gene100_6.csv	58	0.256999969	3	0	p`= 0.03	P = 0	NULL
hc	quantile	4	D:\RST\Gene100_7.csv	54	0.24000001	4	0	p`= 0.04	P = 0	NULL
hc	quantile	4	D:\RST\Gene100_8.csv	53	0.263000011	4	0	p`= 0.04	P = 0	NULL
hc	quantile	4	D:\RST\Gene100_9.csv	58	0.249000072	3	0	p`= 0.03	P = 0	NULL
hc	quantile	4	D:\RST\Gene100_10.csv	58	0.26699996	3	0	p`= 0.03	P = 0	NULL
hc	quantile	3	D:\RST\Gene100_1.csv	85	0.302000046	8	1	p`= 0.07	P = 0.25	[BC,GRMZM2G012966]
hc	quantile	3	D:\RST\Gene100_2.csv	93	0.328999996	5	0	p`= 0.05	P = 0	NULL
hc	quantile	3	D:\RST\Gene100_3.csv	84	0.312000036	7	0	p`= 0.07	P = 0	NULL
hc	quantile	3	D:\RST\Gene100_4.csv	89	0.332000017	6	0	p`= 0.06	P = 0	NULL
hc	quantile	3	D:\RST\Gene100_5.csv	89	0.31099987	8	1	p`= 0.07	P = 0.25	[BC,GRMZM2G012966]
hc	quantile	3	D:\RST\Gene100_6.csv	89	0.313999891	5	0	p`= 0.05	P = 0	NULL
hc	quantile	3	D:\RST\Gene100_7.csv	88	0.319999933	6	1	p`= 0.05	P = 0.25	[BC,GRMZM2G012966]
hc	quantile	3	D:\RST\Gene100_8.csv	89	0.337000132	8	1	p`= 0.07	P = 0.25	[BC,GRMZM2G012966]
hc	quantile	3	D:\RST\Gene100_9.csv	88	0.315999985	8	1	p`= 0.07	P = 0.25	[BC,GRMZM2G012966]
hc	quantile	3	D:\RST\Gene100_10.csv	90	0.332999945	5	1	p`= 0.04	P = 0.25	[BC,GRMZM2G012966]
hc	quantile	2	D:\RST\Gene100_1.csv	194	0.584000111	19	4	p`= 0.15	P = 1	[LUT,GRMZM2G012966] [GRMZM2G152135,BC] [BC,GRMZM2G012966] [GRMZM2G152135,ZEA]
hc	quantile	2	D:\RST\Gene100_2.csv	188	0.57799983	10	3	p`= 0.07	P = 0.75	[GRMZM2G012966,LUT] [GRMZM2G152135,BC] [BC,GRMZM2G012966]
hc	quantile	2	D:\RST\Gene100_3.csv	190	0.602999926	14	2	p`= 0.12	P = 0.5	[LUT,GRMZM2G012966] [GRMZM2G152135,BC]
hc	quantile	2	D:\RST\Gene100_4.csv	189	0.611999989	10	2	p`= 0.08	P = 0.5	[LUT,GRMZM2G012966] [BC,GRMZM2G012966]
hc	quantile	2	D:\RST\Gene100_5.csv	193	0.59100008	16	5	p`= 0.11	P = 1.25	[LUT,GRMZM2G012966] [GRMZM2G152135,BC] [BC,GRMZM2G012966] [BC,GRMZM2G300348] [ZEA,GRMZM2G152135]
hc	quantile	2	D:\RST\Gene100_6.csv	185	0.619999886	10	3	p`= 0.07	P = 0.75	[LUT,GRMZM2G012966] [GRMZM2G152135,BC] [LUT,GRMZM2G300348]
hc	quantile	2	D:\RST\Gene100_7.csv	186	0.559999943	16	2	p`= 0.14	P = 0.5	[LUT,GRMZM2G012966] [BC,GRMZM2G012966]
hc	quantile	2	D:\RST\Gene100_8.csv	190	0.666000128	14	3	p`= 0.11	P = 0.75	[GRMZM2G012966,LUT] [GRMZM2G152135,BC] [BC,GRMZM2G012966]
hc	quantile	2	D:\RST\Gene100_9.csv	183	0.642999887	16	3	p`= 0.13	P = 0.75	[LUT,GRMZM2G012966] [GRMZM2G152135,BC] [BC,GRMZM2G012966]
hc	quantile	2	D:\RST\Gene100_10.csv	193	0.671999931	15	2	p`= 0.13	P = 0.5	[LUT,GRMZM2G012966] [GRMZM2G152135,BC]
iamb	quantile	5	D:\RST\Gene100_1.csv	90	1.032000065	6	0	p`= 0.06	P = 0	NULL
iamb	quantile	5	D:\RST\Gene100_2.csv	104	0.625	7	1	p`= 0.06	P = 0.25	[BC,GRMZM2G012966]
iamb	quantile	5	D:\RST\Gene100_3.csv	94	0.664000034	8	2	p`= 0.06	P = 0.5	[BC,GRMZM2G012966] [GRMZM2G012966,BC]
iamb	quantile	5	D:\RST\Gene100_4.csv	102	0.14559	8	2	p`= 0.06	P = 0.5	[BC,GRMZM2G012966] [GRMZM2G012966,BC]
iamb	quantile	5	D:\RST\Gene100_5.csv	100	0.674000025	10	2	p`= 0.08	P = 0.5	[BC,GRMZM2G012966] [GRMZM2G012966,BC]
iamb	quantile	5	D:\RST\Gene100_6.csv	96	0.83100009	8	2	p`= 0.06	P = 0.5	[BC,GRMZM2G012966] [GRMZM2G012966,BC]
iamb	quantile	5	D:\RST\Gene100_7.csv	98	2.214999914	12	2	p`= 0.1	P = 0.5	[BC,GRMZM2G012966] [GRMZM2G012966,BC]
iamb	quantile	5	D:\RST\Gene100_8.csv	102	0.71600008	8	2	p`= 0.06	P = 0.5	[BC,GRMZM2G012966] [GRMZM2G012966,BC]
iamb	quantile	5	D:\RST\Gene100_9.csv	100	1.179633335	10	2	p`= 0.08	P = 0.5	[BC,GRMZM2G012966] [GRMZM2G012966,BC]
iamb	quantile	5	D:\RST\Gene100_10.csv	94	0.787000179	8	2	p`= 0.06	P = 0.5	[BC,GRMZM2G012966] [GRMZM2G012966,BC]
iamb	quantile	4	D:\RST\Gene100_1.csv	110	1.356000185	6	1	p`= 0.05	P = 0.25	[GRMZM2G152135,BC]
iamb	quantile	4	D:\RST\Gene100_2.csv	116	1.019999981	6	1	p`= 0.05	P = 0.25	[GRMZM2G152135,BC]
iamb	quantile	4	D:\RST\Gene100_3.csv	114	0.992000103	8	1	p`= 0.07	P = 0.25	[GRMZM2G152135,BC]
iamb	quantile	4	D:\RST\Gene100_4.csv	114	1.13499999	8	1	p`= 0.07	P = 0.25	[GRMZM2G152135,BC]
iamb	quantile	4	D:\RST\Gene100_5.csv	122	0.871000051	6	1	p`= 0.05	P = 0.25	[GRMZM2G152135,BC]
iamb	quantile	4	D:\RST\Gene100_6.csv	111	0.809999943	8	3	p`= 0.05	P = 0.75	[LUT,GRMZM2G012966] [GRMZM2G012966,LUT] [GRMZM2G152135,BC]
iamb	quantile	4	D:\RST\Gene100_7.csv	102	0.799000025	8	2	p`= 0.06	P = 0.5	[BC,GRMZM2G152135] [GRMZM2G152135,BC]
iamb	quantile	4	D:\RST\Gene100_8.csv	125	0.869999886	6	1	p`= 0.05	P = 0.25	[GRMZM2G152135,BC]
iamb	quantile	4	D:\RST\Gene100_9.csv	110	1.33100009	6	1	p`= 0.05	P = 0.25	[GRMZM2G152135,BC]
iamb	quantile	4	D:\RST\Gene100_10.csv	103	1.463000059	8	1	p`= 0.07	P = 0.25	[GRMZM2G152135,BC]
iamb	quantile	3	D:\RST\Gene100_1.csv	125	1.128000021	11	1	p`= 0.1	P = 0.25	[GRMZM2G012966,AC]
iamb	quantile	3	D:\RST\Gene100_2.csv	109	3.916000128	7	0	p`= 0.07	P = 0	NULL
iamb	quantile	3	D:\RST\Gene100_3.csv	120	1.130499983	10	0	p`= 0.1	P = 0	NULL
iamb	quantile	3	D:\RST\Gene100_4.csv	121	1.597000122	6	0	p`= 0.06	P = 0	NULL
iamb	quantile	3	D:\RST\Gene100_5.csv	114	0.743000031	11	0	p`= 0.11	P = 0	NULL
iamb	quantile	3	D:\RST\Gene100_6.csv	127	0.830999851	14	0	p`= 0.14	P = 0	NULL
iamb	quantile	3	D:\RST\Gene100_7.csv	120	1.08100009	10	0	p`= 0.1	P = 0	NULL
iamb	quantile	3	D:\RST\Gene100_8.csv	118	1.023999929	7	0	p`= 0.07	P = 0	NULL
iamb	quantile	3	D:\RST\Gene100_9.csv	124	1.03399992	14	0	p`= 0.14	P = 0	NULL
iamb	quantile	3	D:\RST\Gene100_10.csv	112	1.085999966	8	0	p`= 0.08	P = 0	NULL
iamb	quantile	2	D:\RST\Gene100_1.csv	129	0.701000214	16	4	p`= 0.12	P = 1	[ZEA,GRMZM2G152135] [BC,GRMZM2G012966] [GRMZM2G012966,BC] [GRMZM2G152135,ZEA]
iamb	quantile	2	D:\RST\Gene100_2.csv	111	0.871000051	7	2	p`= 0.05	P = 0.5	[ZEA,GRMZM2G152135] [GRMZM2G012966,BC]
iamb	quantile	2	D:\RST\Gene100_3.csv	110	0.790999889	10	2	p`= 0.08	P = 0.5	[BC,GRMZM2G152135] [GRMZM2G012966,BC]
iamb	quantile	2	D:\RST\Gene100_4.csv	120	0.802999973	13	5	p`= 0.08	P = 1.25	[LUT,GRMZM2G012966] [ZEA,GRMZM2G152135] [BC,GRMZM2G012966] [GRMZM2G012966,LUT] [GRMZM2G152135,BC]
iamb	quantile	2	D:\RST\Gene100_5.csv	118	0.77699995	8	2	p`= 0.06	P = 0.5	[BC,GRMZM2G152135] [GRMZM2G012966,BC]
iamb	quantile	2	D:\RST\Gene100_6.csv	116	0.778999805	8	2	p`= 0.06	P = 0.5	[GRMZM2G012966,BC] [GRMZM2G152135,BC]
iamb	quantile	2	D:\RST\Gene100_7.csv	130	0.763000011	8	4	p`= 0.04	P = 1	[LUT,GRMZM2G012966] [BC,GRMZM2G012966] [GRMZM2G012966,LUT] [GRMZM2G152135,BC]
iamb	quantile	2	D:\RST\Gene100_8.csv	119	0.888999939	7	1	p`= 0.06	P = 0.25	[GRMZM2G152135,BC]
iamb	quantile	2	D:\RST\Gene100_9.csv	132	0.871999979	20	1	p`= 0.19	P = 0.25	[LUT,GRMZM2G012966]
iamb	quantile	2	D:\RST\Gene100_10.csv	140	0.893000126	14	4	p`= 0.1	P = 1	[ZEA,GRMZM2G152135] [GRMZM2G012966,BC] [GRMZM2G152135,ZEA] [GRMZM2G152135,BC]
mmpc	quantile	5	D:\RST\Gene100_1.csv	128	0.559999943	14	2	p`= 0.12	P = 0.5	[BC,GRMZM2G012966] [GRMZM2G012966,BC]
mmpc	quantile	5	D:\RST\Gene100_2.csv	132	0.584000111	12	2	p`= 0.1	P = 0.5	[BC,GRMZM2G012966] [GRMZM2G012966,BC]
mmpc	quantile	5	D:\RST\Gene100_3.csv	134	0.59100008	14	2	p`= 0.12	P = 0.5	[BC,GRMZM2G012966] [GRMZM2G012966,BC]
mmpc	quantile	5	D:\RST\Gene100_4.csv	140	0.562999964	10	2	p`= 0.08	P = 0.5	[BC,GRMZM2G012966] [GRMZM2G012966,BC]
mmpc	quantile	5	D:\RST\Gene100_5.csv	138	0.557999849	10	2	p`= 0.08	P = 0.5	[BC,GRMZM2G012966] [GRMZM2G012966,BC]
mmpc	quantile	5	D:\RST\Gene100_6.csv	132	0.549000025	14	2	p`= 0.12	P = 0.5	[BC,GRMZM2G012966] [GRMZM2G012966,BC]
mmpc	quantile	5	D:\RST\Gene100_7.csv	146	0.587999821	14	2	p`= 0.12	P = 0.5	[BC,GRMZM2G012966] [GRMZM2G012966,BC]
mmpc	quantile	5	D:\RST\Gene100_8.csv	118	0.585999966	12	2	p`= 0.1	P = 0.5	[BC,GRMZM2G012966] [GRMZM2G012966,BC]
mmpc	quantile	5	D:\RST\Gene100_9.csv	132	0.601000071	12	2	p`= 0.1	P = 0.5	[BC,GRMZM2G012966] [GRMZM2G012966,BC]
mmpc	quantile	5	D:\RST\Gene100_10.csv	126	0.569000006	14	2	p`= 0.12	P = 0.5	[BC,GRMZM2G012966] [GRMZM2G012966,BC]
mmpc	quantile	4	D:\RST\Gene100_1.csv	132	0.595999956	12	4	p`= 0.08	P = 1	[ZEA,GRMZM2G300348] [BC,GRMZM2G012966] [GRMZM2G012966,BC] [GRMZM2G300348,ZEA]
mmpc	quantile	4	D:\RST\Gene100_2.csv	134	0.57799983	14	6	p`= 0.08	P = 1.5	[ZEA,GRMZM2G300348] [AC,GRMZM2G152135] [BC,GRMZM2G012966] [GRMZM2G012966,BC] [GRMZM2G152135,AC] [GRMZM2G300348,ZEA]
mmpc	quantile	4	D:\RST\Gene100_3.csv	124	0.537000179	12	6	p`= 0.06	P = 1.5	[ZEA,GRMZM2G300348] [AC,GRMZM2G152135] [BC,GRMZM2G012966] [GRMZM2G012966,BC] [GRMZM2G152135,AC] [GRMZM2G300348,ZEA]
mmpc	quantile	4	D:\RST\Gene100_4.csv	160	0.575999975	14	6	p`= 0.08	P = 1.5	[LUT,GRMZM2G012966] [ZEA,GRMZM2G300348] [BC,GRMZM2G012966] [GRMZM2G012966,BC] [GRMZM2G012966,LUT] [GRMZM2G300348,ZEA]
mmpc	quantile	4	D:\RST\Gene100_5.csv	132	0.549999952	16	8	p`= 0.08	P = 2	[LUT,GRMZM2G012966] [ZEA,GRMZM2G300348] [AC,GRMZM2G152135] [BC,GRMZM2G012966] [GRMZM2G012966,BC] [GRMZM2G012966,LUT] [GRMZM2G152135,AC] [GRMZM2G300348,ZEA]
mmpc	quantile	4	D:\RST\Gene100_6.csv	162	0.617999792	14	6	p`= 0.08	P = 1.5	[ZEA,GRMZM2G300348] [ZEA,GRMZM2G012966] [AC,GRMZM2G152135] [GRMZM2G012966,ZEA] [GRMZM2G152135,AC] [GRMZM2G300348,ZEA]
mmpc	quantile	4	D:\RST\Gene100_7.csv	128	0.551000118	12	6	p`= 0.06	P = 1.5	[LUT,GRMZM2G012966] [ZEA,GRMZM2G300348] [BC,GRMZM2G012966] [GRMZM2G012966,BC] [GRMZM2G012966,LUT] [GRMZM2G300348,ZEA]
mmpc	quantile	4	D:\RST\Gene100_8.csv	152	0.638000011	14	4	p`= 0.1	P = 1	[ZEA,GRMZM2G300348] [BC,GRMZM2G012966] [GRMZM2G012966,BC] [GRMZM2G300348,ZEA]
mmpc	quantile	4	D:\RST\Gene100_9.csv	124	0.532999992	10	2	p`= 0.08	P = 0.5	[BC,GRMZM2G012966] [GRMZM2G012966,BC]
mmpc	quantile	4	D:\RST\Gene100_10.csv	118	0.578999996	14	6	p`= 0.08	P = 1.5	[ZEA,GRMZM2G300348] [AC,GRMZM2G152135] [BC,GRMZM2G012966] [GRMZM2G012966,BC] [GRMZM2G152135,AC] [GRMZM2G300348,ZEA]
mmpc	quantile	3	D:\RST\Gene100_1.csv	118	0.523000002	12	2	p`= 0.1	P = 0.5	[BC,GRMZM2G012966] [GRMZM2G012966,BC]
mmpc	quantile	3	D:\RST\Gene100_2.csv	132	0.573000193	14	2	p`= 0.12	P = 0.5	[BC,GRMZM2G012966] [GRMZM2G012966,BC]
mmpc	quantile	3	D:\RST\Gene100_3.csv	130	0.520999908	12	2	p`= 0.1	P = 0.5	[BC,GRMZM2G012966] [GRMZM2G012966,BC]
mmpc	quantile	3	D:\RST\Gene100_4.csv	126	0.546000004	12	2	p`= 0.1	P = 0.5	[BC,GRMZM2G012966] [GRMZM2G012966,BC]
mmpc	quantile	3	D:\RST\Gene100_5.csv	164	0.516000032	12	2	p`= 0.1	P = 0.5	[BC,GRMZM2G012966] [GRMZM2G012966,BC]
mmpc	quantile	3	D:\RST\Gene100_6.csv	128	0.532000065	12	2	p`= 0.1	P = 0.5	[BC,GRMZM2G012966] [GRMZM2G012966,BC]
mmpc	quantile	3	D:\RST\Gene100_7.csv	136	0.519999981	16	2	p`= 0.14	P = 0.5	[BC,GRMZM2G012966] [GRMZM2G012966,BC]
mmpc	quantile	3	D:\RST\Gene100_8.csv	116	0.553999901	14	2	p`= 0.12	P = 0.5	[BC,GRMZM2G012966] [GRMZM2G012966,BC]
mmpc	quantile	3	D:\RST\Gene100_9.csv	118	0.504999876	12	2	p`= 0.1	P = 0.5	[BC,GRMZM2G012966] [GRMZM2G012966,BC]
mmpc	quantile	3	D:\RST\Gene100_10.csv	116	0.54399991	12	2	p`= 0.1	P = 0.5	[BC,GRMZM2G012966] [GRMZM2G012966,BC]
mmpc	quantile	2	D:\RST\Gene100_1.csv	186	0.522000074	20	6	p`= 0.14	P = 1.5	[LUT,GRMZM2G012966] [ZEA,GRMZM2G152135] [BC,GRMZM2G012966] [GRMZM2G012966,BC] [GRMZM2G012966,LUT] [GRMZM2G152135,ZEA]
mmpc	quantile	2	D:\RST\Gene100_2.csv	186	0.535000086	12	6	p`= 0.06	P = 1.5	[LUT,GRMZM2G012966] [ZEA,GRMZM2G152135] [BC,GRMZM2G012966] [GRMZM2G012966,BC] [GRMZM2G012966,LUT] [GRMZM2G152135,ZEA]
mmpc	quantile	2	D:\RST\Gene100_3.csv	172	0.52699995	16	4	p`= 0.12	P = 1	[LUT,GRMZM2G012966] [BC,GRMZM2G012966] [GRMZM2G012966,BC] [GRMZM2G012966,LUT]
mmpc	quantile	2	D:\RST\Gene100_4.csv	180	0.549000025	12	4	p`= 0.08	P = 1	[LUT,GRMZM2G012966] [BC,GRMZM2G012966] [GRMZM2G012966,BC] [GRMZM2G012966,LUT]
mmpc	quantile	2	D:\RST\Gene100_5.csv	156	0.56400013	12	4	p`= 0.08	P = 1	[LUT,GRMZM2G012966] [BC,GRMZM2G012966] [GRMZM2G012966,BC] [GRMZM2G012966,LUT]
mmpc	quantile	2	D:\RST\Gene100_6.csv	192	0.513000011	10	4	p`= 0.06	P = 1	[LUT,GRMZM2G012966] [BC,GRMZM2G012966] [GRMZM2G012966,BC] [GRMZM2G012966,LUT]
mmpc	quantile	2	D:\RST\Gene100_7.csv	168	0.570000172	14	4	p`= 0.1	P = 1	[LUT,GRMZM2G012966] [BC,GRMZM2G012966] [GRMZM2G012966,BC] [GRMZM2G012966,LUT]
mmpc	quantile	2	D:\RST\Gene100_8.csv	172	0.592999935	14	2	p`= 0.12	P = 0.5	[BC,GRMZM2G012966] [GRMZM2G012966,BC]
mmpc	quantile	2	D:\RST\Gene100_9.csv	166	0.594000101	18	4	p`= 0.14	P = 1	[LUT,GRMZM2G012966] [BC,GRMZM2G012966] [GRMZM2G012966,BC] [GRMZM2G012966,LUT]
mmpc	quantile	2	D:\RST\Gene100_10.csv	196	0.664000034	14	6	p`= 0.08	P = 1.5	[LUT,GRMZM2G012966] [ZEA,GRMZM2G152135] [BC,GRMZM2G012966] [GRMZM2G012966,BC] [GRMZM2G012966,LUT] [GRMZM2G152135,ZEA]
rsmax2	quantile	5	D:\RST\Gene100_1.csv	2	0.786000013	1	0	p`= 0.01	P = 0	NULL
rsmax2	quantile	5	D:\RST\Gene100_2.csv	3	0.824999809	1	0	p`= 0.01	P = 0	NULL
rsmax2	quantile	5	D:\RST\Gene100_3.csv	1	0.761000156	1	0	p`= 0.01	P = 0	NULL
rsmax2	quantile	5	D:\RST\Gene100_4.csv	2	0.773999929	1	0	p`= 0.01	P = 0	NULL
rsmax2	quantile	5	D:\RST\Gene100_5.csv	2	0.765000105	1	0	p`= 0.01	P = 0	NULL
rsmax2	quantile	5	D:\RST\Gene100_6.csv	2	0.766000032	1	0	p`= 0.01	P = 0	NULL
rsmax2	quantile	5	D:\RST\Gene100_7.csv	1	0.740999937	1	0	p`= 0.01	P = 0	NULL
rsmax2	quantile	5	D:\RST\Gene100_8.csv	2	0.812000036	1	0	p`= 0.01	P = 0	NULL
rsmax2	quantile	5	D:\RST\Gene100_9.csv	2	0.789000034	1	0	p`= 0.01	P = 0	NULL
rsmax2	quantile	5	D:\RST\Gene100_10.csv	2	0.799000025	1	0	p`= 0.01	P = 0	NULL
rsmax2	quantile	4	D:\RST\Gene100_1.csv	3	1.099999905	3	0	p`= 0.03	P = 0	NULL
rsmax2	quantile	4	D:\RST\Gene100_2.csv	3	1.065999985	3	0	p`= 0.03	P = 0	NULL
rsmax2	quantile	4	D:\RST\Gene100_3.csv	3	1.078000069	3	0	p`= 0.03	P = 0	NULL
rsmax2	quantile	4	D:\RST\Gene100_4.csv	3	1.087000132	3	0	p`= 0.03	P = 0	NULL
rsmax2	quantile	4	D:\RST\Gene100_5.csv	3	1.129999876	3	0	p`= 0.03	P = 0	NULL
rsmax2	quantile	4	D:\RST\Gene100_6.csv	3	1.024999857	3	0	p`= 0.03	P = 0	NULL
rsmax2	quantile	4	D:\RST\Gene100_7.csv	3	1.0400002	3	0	p`= 0.03	P = 0	NULL
rsmax2	quantile	4	D:\RST\Gene100_8.csv	3	1.063999891	3	0	p`= 0.03	P = 0	NULL
rsmax2	quantile	4	D:\RST\Gene100_9.csv	3	1.049000025	3	0	p`= 0.03	P = 0	NULL
rsmax2	quantile	4	D:\RST\Gene100_10.csv	3	1.062000036	3	0	p`= 0.03	P = 0	NULL
rsmax2	quantile	3	D:\RST\Gene100_1.csv	6	1.121000051	5	1	p`= 0.04	P = 0.25	[BC,GRMZM2G012966]
rsmax2	quantile	3	D:\RST\Gene100_2.csv	4	1.13499999	4	0	p`= 0.04	P = 0	NULL
rsmax2	quantile	3	D:\RST\Gene100_3.csv	8	1.136000156	5	1	p`= 0.04	P = 0.25	[BC,GRMZM2G012966]
rsmax2	quantile	3	D:\RST\Gene100_4.csv	5	1.154000044	5	1	p`= 0.04	P = 0.25	[BC,GRMZM2G012966]
rsmax2	quantile	3	D:\RST\Gene100_5.csv	8	1.118000031	5	1	p`= 0.04	P = 0.25	[BC,GRMZM2G012966]
rsmax2	quantile	3	D:\RST\Gene100_6.csv	7	1.135999918	5	1	p`= 0.04	P = 0.25	[BC,GRMZM2G012966]
rsmax2	quantile	3	D:\RST\Gene100_7.csv	8	1.085999966	5	1	p`= 0.04	P = 0.25	[BC,GRMZM2G012966]
rsmax2	quantile	3	D:\RST\Gene100_8.csv	8	1.152000189	4	0	p`= 0.04	P = 0	NULL
rsmax2	quantile	3	D:\RST\Gene100_9.csv	6	1.076999903	5	1	p`= 0.04	P = 0.25	[BC,GRMZM2G012966]
rsmax2	quantile	3	D:\RST\Gene100_10.csv	8	1.132999897	5	1	p`= 0.04	P = 0.25	[BC,GRMZM2G012966]
rsmax2	quantile	2	D:\RST\Gene100_1.csv	29	1.404000044	9	4	p`= 0.05	P = 1	[LUT,GRMZM2G012966] [GRMZM2G152135,BC] [BC,GRMZM2G012966] [ZEA,GRMZM2G152135]
rsmax2	quantile	2	D:\RST\Gene100_2.csv	26	1.458000183	6	3	p`= 0.03	P = 0.75	[BC,GRMZM2G012966] [GRMZM2G152135,BC] [ZEA,GRMZM2G152135]
rsmax2	quantile	2	D:\RST\Gene100_3.csv	28	1.31400013	8	4	p`= 0.04	P = 1	[LUT,GRMZM2G012966] [GRMZM2G152135,BC] [BC,GRMZM2G012966] [ZEA,GRMZM2G152135]
rsmax2	quantile	2	D:\RST\Gene100_4.csv	24	1.476999998	7	2	p`= 0.05	P = 0.5	[LUT,GRMZM2G012966] [BC,GRMZM2G012966]
rsmax2	quantile	2	D:\RST\Gene100_5.csv	25	1.391000032	7	3	p`= 0.04	P = 0.75	[LUT,GRMZM2G012966] [BC,GRMZM2G012966] [AC,GRMZM2G152135]
rsmax2	quantile	2	D:\RST\Gene100_6.csv	29	1.322999954	8	4	p`= 0.04	P = 1	[LUT,GRMZM2G012966] [GRMZM2G152135,BC] [BC,GRMZM2G012966] [ZEA,GRMZM2G152135]
rsmax2	quantile	2	D:\RST\Gene100_7.csv	23	1.463000059	9	4	p`= 0.05	P = 1	[LUT,GRMZM2G012966] [GRMZM2G152135,BC] [BC,GRMZM2G012966] [ZEA,GRMZM2G152135]
rsmax2	quantile	2	D:\RST\Gene100_8.csv	28	1.584000111	8	4	p`= 0.04	P = 1	[LUT,GRMZM2G012966] [GRMZM2G152135,BC] [BC,GRMZM2G012966] [ZEA,GRMZM2G152135]
rsmax2	quantile	2	D:\RST\Gene100_9.csv	26	1.569000006	8	3	p`= 0.05	P = 0.75	[LUT,GRMZM2G012966] [GRMZM2G152135,BC] [Bcry,GRMZM2G012966]
rsmax2	quantile	2	D:\RST\Gene100_10.csv	28	1.649999857	8	3	p`= 0.05	P = 0.75	[BC,GRMZM2G012966] [GRMZM2G152135,BC] [ZEA,GRMZM2G152135]
tabu	quantile	5	D:\RST\Gene100_1.csv	30	0.309999943	2	0	p`= 0.02	P = 0	NULL
tabu	quantile	5	D:\RST\Gene100_2.csv	34	0.289000034	2	0	p`= 0.02	P = 0	NULL
tabu	quantile	5	D:\RST\Gene100_3.csv	18	0.213999987	2	0	p`= 0.02	P = 0	NULL
tabu	quantile	5	D:\RST\Gene100_4.csv	26	0.246999979	2	0	p`= 0.02	P = 0	NULL
tabu	quantile	5	D:\RST\Gene100_5.csv	31	0.254999876	2	0	p`= 0.02	P = 0	NULL
tabu	quantile	5	D:\RST\Gene100_6.csv	25	0.220999956	2	0	p`= 0.02	P = 0	NULL
tabu	quantile	5	D:\RST\Gene100_7.csv	27	0.244999886	2	0	p`= 0.02	P = 0	NULL
tabu	quantile	5	D:\RST\Gene100_8.csv	24	0.25	2	0	p`= 0.02	P = 0	NULL
tabu	quantile	5	D:\RST\Gene100_9.csv	28	0.260999918	2	0	p`= 0.02	P = 0	NULL
tabu	quantile	5	D:\RST\Gene100_10.csv	31	0.263000011	2	0	p`= 0.02	P = 0	NULL
tabu	quantile	4	D:\RST\Gene100_1.csv	52	0.309000015	3	0	p`= 0.03	P = 0	NULL
tabu	quantile	4	D:\RST\Gene100_2.csv	51	0.318000078	3	0	p`= 0.03	P = 0	NULL
tabu	quantile	4	D:\RST\Gene100_3.csv	44	0.267999887	3	0	p`= 0.03	P = 0	NULL
tabu	quantile	4	D:\RST\Gene100_4.csv	60	0.329999924	4	0	p`= 0.04	P = 0	NULL
tabu	quantile	4	D:\RST\Gene100_5.csv	55	0.311999798	3	0	p`= 0.03	P = 0	NULL
tabu	quantile	4	D:\RST\Gene100_6.csv	59	0.325999975	3	0	p`= 0.03	P = 0	NULL
tabu	quantile	4	D:\RST\Gene100_7.csv	57	0.345999956	4	0	p`= 0.04	P = 0	NULL
tabu	quantile	4	D:\RST\Gene100_8.csv	54	0.337999821	4	0	p`= 0.04	P = 0	NULL
tabu	quantile	4	D:\RST\Gene100_9.csv	58	0.299000025	3	0	p`= 0.03	P = 0	NULL
tabu	quantile	4	D:\RST\Gene100_10.csv	61	0.400000095	4	0	p`= 0.04	P = 0	NULL
tabu	quantile	3	D:\RST\Gene100_1.csv	85	0.361999989	8	1	p`= 0.07	P = 0.25	[BC,GRMZM2G012966]
tabu	quantile	3	D:\RST\Gene100_2.csv	94	0.391000032	5	0	p`= 0.05	P = 0	NULL
tabu	quantile	3	D:\RST\Gene100_3.csv	85	0.388000011	8	1	p`= 0.07	P = 0.25	[GRMZM2G012966,BC]
tabu	quantile	3	D:\RST\Gene100_4.csv	91	0.402999878	7	0	p`= 0.07	P = 0	NULL
tabu	quantile	3	D:\RST\Gene100_5.csv	91	0.434000015	9	1	p`= 0.08	P = 0.25	[BC,GRMZM2G012966]
tabu	quantile	3	D:\RST\Gene100_6.csv	89	0.374000072	5	0	p`= 0.05	P = 0	NULL
tabu	quantile	3	D:\RST\Gene100_7.csv	89	0.398000002	7	1	p`= 0.06	P = 0.25	[BC,GRMZM2G012966]
tabu	quantile	3	D:\RST\Gene100_8.csv	90	0.423000097	8	1	p`= 0.07	P = 0.25	[GRMZM2G012966,BC]
tabu	quantile	3	D:\RST\Gene100_9.csv	88	0.393999815	8	1	p`= 0.07	P = 0.25	[BC,GRMZM2G012966]
tabu	quantile	3	D:\RST\Gene100_10.csv	91	0.416000128	6	1	p`= 0.05	P = 0.25	[BC,GRMZM2G012966]
tabu	quantile	2	D:\RST\Gene100_1.csv	194	0.674999952	19	4	p`= 0.15	P = 1	[LUT,GRMZM2G012966] [GRMZM2G152135,BC] [BC,GRMZM2G012966] [GRMZM2G152135,ZEA]
tabu	quantile	2	D:\RST\Gene100_2.csv	189	0.697000027	10	3	p`= 0.07	P = 0.75	[GRMZM2G012966,LUT] [GRMZM2G152135,BC] [BC,GRMZM2G012966]
tabu	quantile	2	D:\RST\Gene100_3.csv	190	0.707999945	14	2	p`= 0.12	P = 0.5	[LUT,GRMZM2G012966] [GRMZM2G152135,BC]
tabu	quantile	2	D:\RST\Gene100_4.csv	190	0.715000153	11	2	p`= 0.09	P = 0.5	[BC,GRMZM2G012966] [LUT,GRMZM2G012966]
tabu	quantile	2	D:\RST\Gene100_5.csv	194	0.73300004	16	5	p`= 0.11	P = 1.25	[LUT,GRMZM2G012966] [GRMZM2G152135,BC] [BC,GRMZM2G012966] [BC,GRMZM2G300348] [GRMZM2G152135,ZEA]
tabu	quantile	2	D:\RST\Gene100_6.csv	185	0.667000055	10	3	p`= 0.07	P = 0.75	[LUT,GRMZM2G012966] [GRMZM2G152135,BC] [LUT,GRMZM2G300348]
tabu	quantile	2	D:\RST\Gene100_7.csv	188	0.848999977	18	3	p`= 0.15	P = 0.75	[GRMZM2G152135,Bcry] [LUT,GRMZM2G012966] [BC,GRMZM2G012966]
tabu	quantile	2	D:\RST\Gene100_8.csv	190	0.788000107	14	3	p`= 0.11	P = 0.75	[GRMZM2G012966,LUT] [GRMZM2G152135,BC] [BC,GRMZM2G012966]
tabu	quantile	2	D:\RST\Gene100_9.csv	184	0.736000061	16	3	p`= 0.13	P = 0.75	[LUT,GRMZM2G012966] [GRMZM2G152135,BC] [BC,GRMZM2G012966]
tabu	quantile	2	D:\RST\Gene100_10.csv	195	0.825000048	15	2	p`= 0.13	P = 0.5	[LUT,GRMZM2G012966] [GRMZM2G152135,BC]
fastiamb	quantile	5	D:\RST\Gene100_1.csv	65	0.445000172	4	0	p`= 0.04	P = 0	NULL
fastiamb	quantile	5	D:\RST\Gene100_2.csv	77	0.256999969	4	0	p`= 0.04	P = 0	NULL
fastiamb	quantile	5	D:\RST\Gene100_3.csv	68	0.277999878	4	0	p`= 0.04	P = 0	NULL
fastiamb	quantile	5	D:\RST\Gene100_4.csv	74	0.249000072	4	0	p`= 0.04	P = 0	NULL
fastiamb	quantile	5	D:\RST\Gene100_5.csv	77	0.257999897	4	0	p`= 0.04	P = 0	NULL
fastiamb	quantile	5	D:\RST\Gene100_6.csv	73	0.263999939	4	0	p`= 0.04	P = 0	NULL
fastiamb	quantile	5	D:\RST\Gene100_7.csv	74	0.254999876	4	0	p`= 0.04	P = 0	NULL
fastiamb	quantile	5	D:\RST\Gene100_8.csv	92	0.254999876	4	0	p`= 0.04	P = 0	NULL
fastiamb	quantile	5	D:\RST\Gene100_9.csv	84	0.657999992	4	0	p`= 0.04	P = 0	NULL
fastiamb	quantile	5	D:\RST\Gene100_10.csv	70	0.264999866	4	0	p`= 0.04	P = 0	NULL
fastiamb	quantile	4	D:\RST\Gene100_1.csv	75	0.269000053	4	0	p`= 0.04	P = 0	NULL
fastiamb	quantile	4	D:\RST\Gene100_2.csv	76	0.236000061	4	0	p`= 0.04	P = 0	NULL
fastiamb	quantile	4	D:\RST\Gene100_3.csv	71	0.226999998	4	0	p`= 0.04	P = 0	NULL
fastiamb	quantile	4	D:\RST\Gene100_4.csv	90	0.235000134	4	0	p`= 0.04	P = 0	NULL
fastiamb	quantile	4	D:\RST\Gene100_5.csv	72	0.21600008	4	0	p`= 0.04	P = 0	NULL
fastiamb	quantile	4	D:\RST\Gene100_6.csv	70	0.223999977	4	0	p`= 0.04	P = 0	NULL
fastiamb	quantile	4	D:\RST\Gene100_7.csv	70	0.212999821	4	0	p`= 0.04	P = 0	NULL
fastiamb	quantile	4	D:\RST\Gene100_8.csv	75	0.243000031	4	0	p`= 0.04	P = 0	NULL
fastiamb	quantile	4	D:\RST\Gene100_9.csv	88	0.31400013	4	0	p`= 0.04	P = 0	NULL
fastiamb	quantile	4	D:\RST\Gene100_10.csv	63	0.302000046	4	0	p`= 0.04	P = 0	NULL
fastiamb	quantile	3	D:\RST\Gene100_1.csv	121	0.721999884	10	0	p`= 0.1	P = 0	NULL
fastiamb	quantile	3	D:\RST\Gene100_2.csv	100	0.304999828	8	0	p`= 0.08	P = 0	NULL
fastiamb	quantile	3	D:\RST\Gene100_3.csv	112	0.365999937	10	0	p`= 0.1	P = 0	NULL
fastiamb	quantile	3	D:\RST\Gene100_4.csv	112	0.304999828	10	0	p`= 0.1	P = 0	NULL
fastiamb	quantile	3	D:\RST\Gene100_5.csv	117	0.294999838	8	0	p`= 0.08	P = 0	NULL
fastiamb	quantile	3	D:\RST\Gene100_6.csv	120	0.279999971	10	0	p`= 0.1	P = 0	NULL
fastiamb	quantile	3	D:\RST\Gene100_7.csv	114	0.296999931	10	0	p`= 0.1	P = 0	NULL
fastiamb	quantile	3	D:\RST\Gene100_8.csv	109	0.303999901	8	0	p`= 0.08	P = 0	NULL
fastiamb	quantile	3	D:\RST\Gene100_9.csv	112	0.416000128	8	0	p`= 0.08	P = 0	NULL
fastiamb	quantile	3	D:\RST\Gene100_10.csv	110	0.549000025	10	0	p`= 0.1	P = 0	NULL
fastiamb	quantile	2	D:\RST\Gene100_1.csv	148	0.402999878	16	4	p`= 0.12	P = 1	[ZEA,GRMZM2G152135] [GRMZM2G012966,LUT] [GRMZM2G152135,ZEA] [GRMZM2G152135,BC]
fastiamb	quantile	2	D:\RST\Gene100_2.csv	151	0.424000025	9	2	p`= 0.07	P = 0.5	[LUT,GRMZM2G012966] [BC,GRMZM2G012966]
fastiamb	quantile	2	D:\RST\Gene100_3.csv	141	0.410000086	9	2	p`= 0.07	P = 0.5	[GRMZM2G012966,LUT] [GRMZM2G152135,BC]
fastiamb	quantile	2	D:\RST\Gene100_4.csv	128	0.398000002	10	5	p`= 0.05	P = 1.25	[LUT,GRMZM2G012966] [ZEA,GRMZM2G152135] [BC,GRMZM2G012966] [GRMZM2G152135,ZEA] [GRMZM2G152135,BC]
fastiamb	quantile	2	D:\RST\Gene100_5.csv	128	0.454999924	10	2	p`= 0.08	P = 0.5	[LUT,GRMZM2G012966] [BC,GRMZM2G012966]
fastiamb	quantile	2	D:\RST\Gene100_6.csv	134	0.399000168	9	3	p`= 0.06	P = 0.75	[LUT,GRMZM2G012966] [GRMZM2G012966,LUT] [GRMZM2G152135,BC]
fastiamb	quantile	2	D:\RST\Gene100_7.csv	129	0.40199995	10	3	p`= 0.07	P = 0.75	[LUT,GRMZM2G012966] [BC,GRMZM2G012966] [GRMZM2G152135,BC]
fastiamb	quantile	2	D:\RST\Gene100_8.csv	142	0.481999874	8	2	p`= 0.06	P = 0.5	[BC,GRMZM2G152135] [GRMZM2G012966,LUT]
fastiamb	quantile	2	D:\RST\Gene100_9.csv	149	0.444999933	10	3	p`= 0.07	P = 0.75	[GRMZM2G012966,LUT] [GRMZM2G152135,ZEA] [GRMZM2G152135,BC]
fastiamb	quantile	2	D:\RST\Gene100_10.csv	140	0.489000082	13	4	p`= 0.09	P = 1	[LUT,GRMZM2G012966] [BC,GRMZM2G012966] [GRMZM2G152135,ZEA] [GRMZM2G152135,BC]
interiamb	quantile	5	D:\RST\Gene100_1.csv	91	0.980000019	6	0	p`= 0.06	P = 0	NULL
interiamb	quantile	5	D:\RST\Gene100_2.csv	118	0.645999908	7	1	p`= 0.06	P = 0.25	[BC,GRMZM2G012966]
interiamb	quantile	5	D:\RST\Gene100_3.csv	119	0.69299984	8	2	p`= 0.06	P = 0.5	[BC,GRMZM2G012966] [GRMZM2G012966,BC]
interiamb	quantile	5	D:\RST\Gene100_4.csv	106	1.238499999	10	2	p`= 0.08	P = 0.5	[BC,GRMZM2G012966] [GRMZM2G012966,BC]
interiamb	quantile	5	D:\RST\Gene100_5.csv	115	0.669000149	12	2	p`= 0.1	P = 0.5	[BC,GRMZM2G012966] [GRMZM2G012966,BC]
interiamb	quantile	5	D:\RST\Gene100_6.csv	99	0.799000025	8	2	p`= 0.06	P = 0.5	[BC,GRMZM2G012966] [GRMZM2G012966,BC]
interiamb	quantile	5	D:\RST\Gene100_7.csv	103	2.055000067	12	2	p`= 0.1	P = 0.5	[BC,GRMZM2G012966] [GRMZM2G012966,BC]
interiamb	quantile	5	D:\RST\Gene100_8.csv	128	0.710999966	9	2	p`= 0.07	P = 0.5	[BC,GRMZM2G012966] [GRMZM2G012966,BC]
interiamb	quantile	5	D:\RST\Gene100_9.csv	117	1.112816668	6	1	p`= 0.05	P = 0.25	[GRMZM2G012966,BC]
interiamb	quantile	5	D:\RST\Gene100_10.csv	99	0.796000004	8	2	p`= 0.06	P = 0.5	[BC,GRMZM2G012966] [GRMZM2G012966,BC]
interiamb	quantile	4	D:\RST\Gene100_1.csv	110	1.205000162	6	1	p`= 0.05	P = 0.25	[GRMZM2G152135,BC]
interiamb	quantile	4	D:\RST\Gene100_2.csv	108	1.040999889	6	1	p`= 0.05	P = 0.25	[GRMZM2G152135,BC]
interiamb	quantile	4	D:\RST\Gene100_3.csv	121	0.917000055	8	1	p`= 0.07	P = 0.25	[GRMZM2G152135,BC]
interiamb	quantile	4	D:\RST\Gene100_4.csv	128	1.069999933	8	1	p`= 0.07	P = 0.25	[GRMZM2G152135,BC]
interiamb	quantile	4	D:\RST\Gene100_5.csv	117	0.801000118	6	1	p`= 0.05	P = 0.25	[BC,GRMZM2G152135]
interiamb	quantile	4	D:\RST\Gene100_6.csv	116	0.894999981	9	3	p`= 0.06	P = 0.75	[LUT,GRMZM2G012966] [GRMZM2G012966,LUT] [GRMZM2G152135,BC]
interiamb	quantile	4	D:\RST\Gene100_7.csv	95	0.827000141	6	0	p`= 0.06	P = 0	NULL
interiamb	quantile	4	D:\RST\Gene100_8.csv	125	0.899000168	6	1	p`= 0.05	P = 0.25	[GRMZM2G152135,BC]
interiamb	quantile	4	D:\RST\Gene100_9.csv	104	1.232000113	6	1	p`= 0.05	P = 0.25	[GRMZM2G152135,BC]
interiamb	quantile	4	D:\RST\Gene100_10.csv	101	3.220999956	10	1	p`= 0.09	P = 0.25	[GRMZM2G152135,BC]
interiamb	quantile	3	D:\RST\Gene100_1.csv	125	3.687999964	10	1	p`= 0.09	P = 0.25	[GRMZM2G012966,AC]
interiamb	quantile	3	D:\RST\Gene100_2.csv	109	3.872000217	8	0	p`= 0.08	P = 0	NULL
interiamb	quantile	3	D:\RST\Gene100_3.csv	116	3.769999981	10	0	p`= 0.1	P = 0	NULL
interiamb	quantile	3	D:\RST\Gene100_4.csv	109	1.657999992	7	0	p`= 0.07	P = 0	NULL
interiamb	quantile	3	D:\RST\Gene100_5.csv	94	0.842000008	7	0	p`= 0.07	P = 0	NULL
interiamb	quantile	3	D:\RST\Gene100_6.csv	140	0.812999964	12	0	p`= 0.12	P = 0	NULL
interiamb	quantile	3	D:\RST\Gene100_7.csv	126	1.707000017	10	0	p`= 0.1	P = 0	NULL
interiamb	quantile	3	D:\RST\Gene100_8.csv	113	0.903999805	9	0	p`= 0.09	P = 0	NULL
interiamb	quantile	3	D:\RST\Gene100_9.csv	120	1.046999931	8	0	p`= 0.08	P = 0	NULL
interiamb	quantile	3	D:\RST\Gene100_10.csv	104	1.142999887	8	0	p`= 0.08	P = 0	NULL
interiamb	quantile	2	D:\RST\Gene100_1.csv	129	0.838999987	9	3	p`= 0.06	P = 0.75	[BC,GRMZM2G012966] [GRMZM2G152135,ZEA] [GRMZM2G152135,BC]
interiamb	quantile	2	D:\RST\Gene100_2.csv	133	0.921000004	8	3	p`= 0.05	P = 0.75	[GRMZM2G012966,BC] [GRMZM2G152135,ZEA] [GRMZM2G152135,BC]
interiamb	quantile	2	D:\RST\Gene100_3.csv	125	1.012000084	9	1	p`= 0.08	P = 0.25	[GRMZM2G012966,BC]
interiamb	quantile	2	D:\RST\Gene100_4.csv	118	0.814999819	8	2	p`= 0.06	P = 0.5	[GRMZM2G012966,LUT] [GRMZM2G012966,BC]
interiamb	quantile	2	D:\RST\Gene100_5.csv	135	0.875999928	10	2	p`= 0.08	P = 0.5	[GRMZM2G012966,BC] [GRMZM2G152135,BC]
interiamb	quantile	2	D:\RST\Gene100_6.csv	130	0.892999887	7	2	p`= 0.05	P = 0.5	[ZEA,GRMZM2G152135] [GRMZM2G012966,BC]
interiamb	quantile	2	D:\RST\Gene100_7.csv	136	0.99000001	8	3	p`= 0.05	P = 0.75	[LUT,GRMZM2G012966] [BC,GRMZM2G012966] [GRMZM2G152135,BC]
interiamb	quantile	2	D:\RST\Gene100_8.csv	142	0.9599998	9	3	p`= 0.06	P = 0.75	[LUT,GRMZM2G012966] [BC,GRMZM2G012966] [GRMZM2G012966,BC]
interiamb	quantile	2	D:\RST\Gene100_9.csv	141	0.947000027	13	2	p`= 0.11	P = 0.5	[LUT,GRMZM2G012966] [ZEA,GRMZM2G152135]
interiamb	quantile	2	D:\RST\Gene100_10.csv	143	0.993999958	12	3	p`= 0.09	P = 0.75	[GRMZM2G012966,BC] [GRMZM2G152135,ZEA] [GRMZM2G152135,BC]
mmhc	quantile	5	D:\RST\Gene100_1.csv	4	0.575000048	1	0	p`= 0.01	P = 0	NULL
mmhc	quantile	5	D:\RST\Gene100_2.csv	2	0.611999989	1	0	p`= 0.01	P = 0	NULL
mmhc	quantile	5	D:\RST\Gene100_3.csv	2	0.570999861	1	0	p`= 0.01	P = 0	NULL
mmhc	quantile	5	D:\RST\Gene100_4.csv	3	0.571000099	1	0	p`= 0.01	P = 0	NULL
mmhc	quantile	5	D:\RST\Gene100_5.csv	5	0.582000017	1	0	p`= 0.01	P = 0	NULL
mmhc	quantile	5	D:\RST\Gene100_6.csv	5	0.572999954	1	0	p`= 0.01	P = 0	NULL
mmhc	quantile	5	D:\RST\Gene100_7.csv	2	0.605000019	1	0	p`= 0.01	P = 0	NULL
mmhc	quantile	5	D:\RST\Gene100_8.csv	1	0.600999832	1	0	p`= 0.01	P = 0	NULL
mmhc	quantile	5	D:\RST\Gene100_9.csv	4	0.598999977	1	0	p`= 0.01	P = 0	NULL
mmhc	quantile	5	D:\RST\Gene100_10.csv	3	0.588000059	1	0	p`= 0.01	P = 0	NULL
mmhc	quantile	4	D:\RST\Gene100_1.csv	17	0.582000017	3	0	p`= 0.03	P = 0	NULL
mmhc	quantile	4	D:\RST\Gene100_2.csv	17	0.59100008	3	0	p`= 0.03	P = 0	NULL
mmhc	quantile	4	D:\RST\Gene100_3.csv	12	0.594000101	3	0	p`= 0.03	P = 0	NULL
mmhc	quantile	4	D:\RST\Gene100_4.csv	18	0.605000019	3	0	p`= 0.03	P = 0	NULL
mmhc	quantile	4	D:\RST\Gene100_5.csv	15	0.549999952	3	0	p`= 0.03	P = 0	NULL
mmhc	quantile	4	D:\RST\Gene100_6.csv	19	0.57400012	3	0	p`= 0.03	P = 0	NULL
mmhc	quantile	4	D:\RST\Gene100_7.csv	16	0.569999933	3	0	p`= 0.03	P = 0	NULL
mmhc	quantile	4	D:\RST\Gene100_8.csv	18	0.602999926	3	0	p`= 0.03	P = 0	NULL
mmhc	quantile	4	D:\RST\Gene100_9.csv	17	0.569000006	3	0	p`= 0.03	P = 0	NULL
mmhc	quantile	4	D:\RST\Gene100_10.csv	12	0.588000059	3	0	p`= 0.03	P = 0	NULL
mmhc	quantile	3	D:\RST\Gene100_1.csv	41	0.609000206	5	1	p`= 0.04	P = 0.25	[BC,GRMZM2G012966]
mmhc	quantile	3	D:\RST\Gene100_2.csv	44	0.605999947	5	1	p`= 0.04	P = 0.25	[BC,GRMZM2G012966]
mmhc	quantile	3	D:\RST\Gene100_3.csv	43	0.552000046	5	1	p`= 0.04	P = 0.25	[BC,GRMZM2G012966]
mmhc	quantile	3	D:\RST\Gene100_4.csv	42	0.589999914	5	1	p`= 0.04	P = 0.25	[BC,GRMZM2G012966]
mmhc	quantile	3	D:\RST\Gene100_5.csv	53	0.56799984	5	1	p`= 0.04	P = 0.25	[BC,GRMZM2G012966]
mmhc	quantile	3	D:\RST\Gene100_6.csv	43	0.578999996	5	1	p`= 0.04	P = 0.25	[BC,GRMZM2G012966]
mmhc	quantile	3	D:\RST\Gene100_7.csv	42	0.562000036	5	1	p`= 0.04	P = 0.25	[BC,GRMZM2G012966]
mmhc	quantile	3	D:\RST\Gene100_8.csv	36	0.620000124	6	1	p`= 0.05	P = 0.25	[BC,GRMZM2G012966]
mmhc	quantile	3	D:\RST\Gene100_9.csv	38	0.558000088	5	1	p`= 0.04	P = 0.25	[BC,GRMZM2G012966]
mmhc	quantile	3	D:\RST\Gene100_10.csv	39	0.579999924	5	1	p`= 0.04	P = 0.25	[BC,GRMZM2G012966]
mmhc	quantile	2	D:\RST\Gene100_1.csv	88	0.599000216	9	3	p`= 0.06	P = 0.75	[BC,GRMZM2G012966] [GRMZM2G012966,LUT] [ZEA,GRMZM2G152135]
mmhc	quantile	2	D:\RST\Gene100_2.csv	91	0.590000153	6	3	p`= 0.03	P = 0.75	[GRMZM2G012966,LUT] [BC,GRMZM2G012966] [GRMZM2G152135,ZEA]
mmhc	quantile	2	D:\RST\Gene100_3.csv	83	0.582999945	8	2	p`= 0.06	P = 0.5	[BC,GRMZM2G012966] [GRMZM2G012966,LUT]
mmhc	quantile	2	D:\RST\Gene100_4.csv	89	0.60800004	6	2	p`= 0.04	P = 0.5	[BC,GRMZM2G012966] [GRMZM2G012966,LUT]
mmhc	quantile	2	D:\RST\Gene100_5.csv	76	0.593999863	6	2	p`= 0.04	P = 0.5	[BC,GRMZM2G012966] [GRMZM2G012966,LUT]
mmhc	quantile	2	D:\RST\Gene100_6.csv	91	0.597999811	5	2	p`= 0.03	P = 0.5	[GRMZM2G012966,LUT] [BC,GRMZM2G012966]
mmhc	quantile	2	D:\RST\Gene100_7.csv	79	1.055999994	7	2	p`= 0.05	P = 0.5	[BC,GRMZM2G012966] [GRMZM2G012966,LUT]
mmhc	quantile	2	D:\RST\Gene100_8.csv	83	0.684000015	7	1	p`= 0.06	P = 0.25	[BC,GRMZM2G012966]
mmhc	quantile	2	D:\RST\Gene100_9.csv	79	0.638000011	9	2	p`= 0.07	P = 0.5	[BC,GRMZM2G012966] [GRMZM2G012966,LUT]
mmhc	quantile	2	D:\RST\Gene100_10.csv	95	0.70600009	7	3	p`= 0.04	P = 0.75	[ZEA,GRMZM2G152135] [GRMZM2G012966,LUT] [BC,GRMZM2G012966]
