# Supplementary material for: Verification of Three-Phase Dependency Analysis Bayesian Network Learning Method for Maize Carotenoid Gene Mining
Source: Biomed Res Int. 2017 Jul 30;2017:1813494. doi: 10.1155/2017/1813494 (PMC5554554; doi:10.1155/2017/1813494)
Supplement: Supplementary file 1 — The experiment data 1 of 109 nodes, the experiment data 2 of 109 nodes, and so on are shown here. [file 1813494.f1.zip › Supplementary material/Gene100_1.csv]

V1	V2	V3	V4	V5	V6	V7	V8	V9	V10	V11	V12	V13	V14	V15	V16	V17	V18	V19	V20	V21	V22	V23	V24	V25	V26	V27	V28	V29	V30	V31	V32	V33	V34	V35	V36	V37	V38	V39	V40	V41	V42	V43	V44	V45	V46	V47	V48	V49	V50
GRMZM2G144742	0.057930049	1.757666049	-1.211918765	-0.230202032	-0.265322712	-0.044289159	0.704730028	-0.133217035	-1.697120332	2.345104662	1.021399468	2.468001988	0.539308633	-0.619896262	-0.872103029	-1.117953259	0.603470624	0.446977502	0.823319923	1.501786817	1.105318189	-2.468001988	-0.523619123	-1.270787244	1.092857156	-1.616536998	0.531447525	0.563095926	0.037471962	0.976525035	1.130769373	0.195363108	0.230202032	-0.237202109	0.417065588	1.568142731	-0.785662535	-1.351202935	0.181496015	1.48107362	-1.403975696	-0.010217413	0.628171949	-0.477294855	-0.43197323	-1.368372038	0.892205847	-0.704730028	0.372878156
GRMZM2G164909	-0.119484771	0.539308633	0.181496015	-0.244213829	-0.265322712	-0.603470624	0.696025208	-1.460977052	0.636490883	-0.279460686	0.619896262	-0.153863466	1.523165155	0.91267586	-0.417065588	0.140092436	-0.933535639	-0.133217035	0.057930049	0.628171949	0.563095926	0.037471962	0.547203211	0.704730028	1.422465003	-1.591873889	-0.539308633	0.954809756	-0.300773842	1.068431117	0.209267873	-0.83291742	0.358313528	-0.09208509	-0.126347925	-1.032943298	0.160759774	2.104600628	-2.645701413	-0.998710851	0.678771572	-0.439462999	1.044626445	0.923055543	-0.160759774	0.823319923	1.318010897	0.300773842	0.439462999
GRMZM2G123355	1.117953259	0.09208509	0.539308633	-0.611662814	0.272384894	-0.823319923	0.776421761	-1.825439172	2.171527717	-1.48107362	0.653262666	0.696025208	0.998710851	0.372878156	1.286210621	1.301946185	-0.500322766	-0.587206217	-0.343824517	0.365586148	-0.804348643	-0.126347925	-1.156974916	0.852346618	-1.368372038	-1.501786817	-1.270787244	0.563095926	-1.33442315	-0.051108415	-1.523165155	-1.056453949	-0.6448541	0.555132042	1.385954264	-0.439462999	0.523619123	-0.216235289	-1.197842699	1.591873889	0.987557182	-0.852346618	2.468001988	0.380190046	1.460977052	-0.51582268	-0.251237576	-0.133217035	1.044626445
GRMZM2G140116	1.568142731	0.484942137	0.358313528	0.902393588	0.611662814	-1.156974916	-0.713488578	-0.933535639	-1.021399468	1.117953259	1.170380633	-0.508057465	1.441453795	-0.146974467	-0.852346618	0.307908216	-0.477294855	-0.704730028	0.085246759	0.35105981	-1.523165155	-0.372878156	2.045954276	-0.237202109	0.661717677	0.508057465	0.365586148	0.098927729	0.300773842	1.197842699	0.794970891	1.318010897	1.460977052	0.555132042	0.531447525	-1.441453795	0.017029548	0.372878156	-1.270787244	0.258273739	-0.153863466	0.43197323	0.998710851	-1.591873889	0.167663737	0.195363108	-0.571095686	0.272384894	0.892205847
GRMZM2G573732	0.776421761	-0.571095686	-0.45451733	0.636490883	-0.380190046	0.587206217	-0.098927729	0.365586148	-2.645701413	0.976525035	-0.998710851	0.7490877	-0.230202032	-0.43197323	-0.713488578	-0.670220259	0.35105981	1.211918765	-1.697120332	0.892205847	0.343824517	0.6448541	-1.501786817	0.258273739	0.446977502	0.286550499	0.45451733	-1.946202375	-0.555132042	-0.776421761	-0.057930049	0.307908216	-0.322224522	-0.794970891	-0.293654744	1.545263217	0.439462999	-0.678771572	0.160759774	-0.484942137	-0.424507616	-0.539308633	-1.568142731	-0.872103029	1.156974916	-0.307908216	-0.492617885	-0.731172307	-0.587206217
GRMZM2G372928	1.197842699	-0.424507616	0.202310601	0.167663737	-0.09208509	1.862731867	0.402250065	-0.279460686	-2.645701413	0.603470624	0.43197323	1.523165155	0.653262666	-0.653262666	-0.140092436	0.119484771	0.954809756	1.642224543	-0.987557182	2.045954276	-0.35105981	0.83291742	-1.545263217	2.345104662	-0.523619123	0.409646587	-0.195363108	-1.385954264	0.387522319	0.051108415	0.74010031	0.365586148	-0.078412413	-1.318010897	0.776421761	0.923055543	-0.329407333	-0.696025208	0.722302208	0.823319923	-0.105775004	0.265322712	-2.468001988	-1.48107362	1.545263217	-0.563095926	-0.531447525	0.563095926	-0.010217413
GRMZM2G157219	-1.117953259	1.441453795	1.318010897	0.023842473	-0.862182757	-0.603470624	0.619896262	-1.669043821	1.032943298	-0.794970891	-1.616536998	0.722302208	0.823319923	-0.279460686	-0.965610478	-0.322224522	-0.563095926	-0.010217413	0.078412413	0.51582268	0.140092436	-1.270787244	-0.892205847	-1.184000049	1.33442315	-0.767246816	-0.057930049	0.892205847	1.143773961	1.270787244	0.380190046	0.064754379	0.555132042	-2.645701413	-0.098927729	0.160759774	-0.91267586	1.068431117	0.402250065	0.258273739	-2.171527717	0.057930049	0.279460686	-0.785662535	-0.078412413	1.021399468	0.587206217	-0.446977502	1.368372038
GRMZM2G493903	-0.523619123	-1.790524917	0.670220259	-0.862182757	0.387522319	-0.071581727	-0.329407333	0.731172307	-0.387522319	1.790524917	0.174575701	-0.842592259	0.160759774	0.862182757	-1.318010897	-0.272384894	0.767246816	0.976525035	0.653262666	-0.91267586	1.092857156	-0.003405752	-0.500322766	-1.226239142	1.130769373	-0.258273739	-0.209267873	0.394875486	0.902393588	1.021399468	0.216235289	0.258273739	0.696025208	1.009990169	0.523619123	1.032943298	-0.713488578	-2.045954276	-1.825439172	0.417065588	0.402250065	-1.056453949	2.468001988	2.645701413	0.944119285	-1.902810954	0.051108415	-1.385954264	-2.468001988
GRMZM2G099529	0.098927729	0.085246759	0.174575701	-1.056453949	-0.944119285	0.394875486	-0.35105981	-1.255660378	-2.998020796	-0.064754379	-1.697120332	1.523165155	-0.071581727	-0.842592259	-1.591873889	-1.197842699	0.571095686	-0.293654744	-0.237202109	1.032943298	-0.380190046	-1.009990169	0.484942137	0.023842473	1.757666049	-1.184000049	0.003405752	-0.678771572	1.156974916	0.776421761	0.813797671	0.51582268	1.240815502	-0.954809756	-1.226239142	0.078412413	-0.998710851	2.645701413	0.146974467	0.531447525	-1.545263217	0.409646587	-0.202310601	-0.804348643	-0.477294855	1.197842699	-0.017029548	-0.670220259	0.230202032
GRMZM2G064750	0.017029548	-0.307908216	0.477294855	0.167663737	0.74010031	-0.279460686	-0.842592259	0.085246759	-0.417065588	-0.153863466	0.315058297	-0.6448541	1.170380633	-0.017029548	-2.645701413	1.697120332	1.318010897	1.368372038	-2.468001988	-0.037471962	0.555132042	0.785662535	-0.500322766	-0.83291742	-2.345104662	1.270787244	-0.167663737	-0.595318735	-0.315058297	-0.670220259	-0.010217413	-0.776421761	0.181496015	0.944119285	0.293654744	-0.286550499	-0.265322712	0.696025208	-2.249880663	-0.571095686	-0.579132162	-2.171527717	-2.104600628	-0.003405752	-0.51582268	-0.653262666	-0.439462999	1.460977052	0.731172307
GRMZM2G310453	-1.568142731	2.171527717	0.571095686	0.336607179	0.91267586	-0.653262666	1.068431117	-0.153863466	-1.385954264	-1.669043821	-0.661717677	2.249880663	1.255660378	-0.307908216	-0.933535639	0.696025208	0.813797671	1.368372038	1.032943298	1.117953259	-0.43197323	0.852346618	-0.539308633	-0.424507616	0.446977502	0.539308633	-0.380190046	-0.611662814	-0.579132162	1.226239142	0.188425032	-0.35105981	0.636490883	-0.057930049	0.251237576	0.872103029	-0.823319923	-0.167663737	0.279460686	-0.394875486	-1.143773961	1.240815502	0.272384894	-0.017029548	0.098927729	1.993601218	-0.230202032	-1.130769373	-0.365586148
GRMZM2G008425	1.616536998	0.804348643	-1.669043821	-0.119484771	0.987557182	-0.037471962	-1.021399468	-0.794970891	-2.998020796	-0.044289159	-0.862182757	2.998020796	1.009990169	-0.293654744	0.003405752	0.051108415	1.501786817	0.628171949	-0.678771572	0.823319923	-0.372878156	0.174575701	-1.757666049	0.098927729	-0.776421761	-1.117953259	-0.133217035	-0.852346618	-1.286210621	-0.45451733	0.852346618	0.579132162	-0.571095686	-1.301946185	0.119484771	0.329407333	-0.265322712	-0.500322766	-0.74010031	0.365586148	-0.933535639	0.678771572	-2.345104662	-1.545263217	0.160759774	1.48107362	-0.813797671	-0.508057465	0.35105981
GRMZM2G001116	0.872103029	-0.74010031	-0.202310601	-1.021399468	1.009990169	1.501786817	-0.365586148	-0.322224522	-1.368372038	-0.813797671	-0.611662814	-0.315058297	-0.892205847	-0.181496015	-0.722302208	-0.387522319	0.365586148	0.167663737	-0.603470624	1.385954264	-0.731172307	-0.987557182	-1.351202935	0.446977502	0.030656506	0.037471962	0.91267586	-1.825439172	0.160759774	-0.462083086	-1.790524917	0.603470624	0.195363108	-1.385954264	0.372878156	1.197842699	0.380190046	0.315058297	-0.43197323	0.112627241	0.670220259	0.105775004	0.965610478	0.785662535	1.368372038	-0.195363108	-0.140092436	-0.804348643	1.211918765
GRMZM2G493395	1.993601218	-0.030656506	0.202310601	-1.032943298	1.351202935	-0.146974467	0.209267873	1.197842699	2.998020796	2.468001988	0.09208509	0.230202032	0.140092436	-1.501786817	0.823319923	-1.056453949	0.223213218	0.965610478	-1.616536998	0.83291742	-0.758136008	0.017029548	-0.293654744	0.237202109	-0.628171949	0.322224522	-0.636490883	-0.133217035	0.174575701	0.365586148	-1.270787244	-1.318010897	0.085246759	-1.48107362	0.678771572	-0.619896262	0.037471962	-0.105775004	-0.140092436	1.068431117	-1.757666049	-0.484942137	0.030656506	-1.130769373	1.697120332	0.402250065	-1.568142731	-0.394875486	0.976525035
GRMZM2G334741	-0.954809756	1.301946185	0.902393588	0.286550499	-2.998020796	-0.595318735	0.45451733	-2.645701413	1.170380633	-2.468001988	-0.017029548	-0.6448541	2.645701413	-0.571095686	0.365586148	-0.071581727	0.343824517	1.092857156	-2.345104662	-0.653262666	0.500322766	-0.794970891	1.009990169	-0.563095926	-2.249880663	0.237202109	-0.862182757	1.642224543	-2.171527717	1.669043821	-2.104600628	-0.387522319	0.776421761	0.216235289	-0.167663737	-2.045954276	0.571095686	1.056453949	0.611662814	1.080563549	-0.611662814	-1.993601218	0.731172307	-1.946202375	-0.670220259	0.265322712	0.587206217	0.258273739	-0.91267586
GRMZM2G035223	-0.51582268	1.368372038	-0.923055543	0.45451733	-0.628171949	-0.965610478	-1.009990169	0.372878156	-2.998020796	1.286210621	1.616536998	0.872103029	1.032943298	0.842592259	-0.133217035	0.09208509	1.902810954	-0.852346618	1.697120332	-0.167663737	0.987557182	-0.153863466	-0.842592259	0.064754379	0.687372812	0.439462999	-0.954809756	0.539308633	0.595318735	-1.523165155	0.74010031	0.758136008	0.322224522	2.645701413	0.223213218	0.181496015	-0.258273739	-1.056453949	-0.595318735	-1.211918765	0.587206217	-0.653262666	-0.365586148	-0.307908216	0.293654744	-0.402250065	-0.619896262	-0.439462999	-0.523619123
GRMZM2G387731	-2.998020796	0.852346618	-0.244213829	-0.731172307	1.862731867	-0.587206217	-0.044289159	0.037471962	-2.645701413	-2.468001988	-0.251237576	1.697120332	-0.976525035	0.731172307	-1.270787244	-2.345104662	0.563095926	0.492617885	-1.092857156	-0.595318735	0.358313528	-0.619896262	-0.417065588	-0.387522319	0.446977502	-0.6448541	-0.279460686	0.133217035	0.409646587	0.051108415	1.270787244	-0.776421761	1.825439172	-0.628171949	-0.057930049	2.045954276	-0.35105981	-0.91267586	1.616536998	-0.611662814	-1.056453949	-2.171527717	2.171527717	0.785662535	0.998710851	-0.372878156	-0.258273739	0.813797671	1.021399468
GRMZM2G078252	-0.372878156	0.944119285	0.098927729	0.244213829	-0.539308633	-0.813797671	0.105775004	-1.068431117	-2.998020796	1.092857156	-0.365586148	2.468001988	0.409646587	-1.255660378	0.051108415	-0.842592259	0.611662814	0.174575701	0.523619123	0.195363108	0.064754379	-0.174575701	-1.056453949	0.91267586	0.188425032	-0.223213218	-0.387522319	-0.322224522	0.7490877	-1.368372038	0.044289159	-0.902393588	0.237202109	-0.758136008	0.126347925	1.385954264	-0.017029548	1.460977052	0.842592259	2.171527717	0.923055543	-0.160759774	-0.500322766	-0.195363108	-0.010217413	0.619896262	0.380190046	0.933535639	-0.181496015
GRMZM2G060324	0.112627241	0.064754379	-0.174575701	1.032943298	1.301946185	0.83291742	0.892205847	-0.140092436	-1.143773961	-0.09208509	-0.112627241	-0.230202032	1.757666049	1.117953259	-0.74010031	-0.758136008	2.045954276	1.056453949	-0.244213829	-1.946202375	-0.687372812	-0.678771572	-0.402250065	0.91267586	1.385954264	-0.272384894	-0.105775004	0.153863466	-0.051108415	2.345104662	1.105318189	1.009990169	0.372878156	-1.441453795	0.523619123	0.343824517	-0.286550499	-0.804348643	-0.923055543	-0.976525035	0.842592259	-0.579132162	-2.998020796	-0.35105981	-1.255660378	-1.642224543	-1.184000049	-1.056453949	0.678771572
GRMZM2G376957	0.944119285	-1.156974916	0.329407333	0.484942137	1.032943298	1.226239142	0.91267586	-1.902810954	2.998020796	-1.591873889	0.105775004	-2.045954276	0.181496015	1.068431117	-0.998710851	0.071581727	0.722302208	0.380190046	-0.83291742	-1.286210621	-1.422465003	-0.272384894	0.731172307	-0.307908216	0.603470624	-1.068431117	-0.539308633	0.237202109	-0.202310601	-1.240815502	-2.104600628	0.140092436	-0.923055543	-1.117953259	0.767246816	-1.441453795	-0.704730028	-0.628171949	-0.126347925	1.184000049	-0.862182757	-0.387522319	1.616536998	0.704730028	1.351202935	0.174575701	0.209267873	0.078412413	0.661717677
GRMZM2G113325	0.402250065	-0.105775004	-0.696025208	-0.439462999	0.619896262	0.09208509	-0.251237576	0.477294855	-2.468001988	-0.579132162	-1.669043821	0.892205847	-0.35105981	-0.508057465	-0.998710851	-1.117953259	0.409646587	0.146974467	-0.91267586	-0.017029548	-0.409646587	-0.202310601	-1.092857156	-0.619896262	-0.140092436	-1.642224543	-1.056453949	-1.044626445	-0.424507616	1.862731867	2.998020796	0.209267873	0.531447525	-0.758136008	-1.902810954	2.645701413	-1.48107362	-1.170380633	-1.032943298	0.358313528	-0.722302208	0.071581727	0.174575701	-0.223213218	0.713488578	1.993601218	-1.130769373	0.195363108	-0.044289159
GRMZM2G364068	1.501786817	2.171527717	1.255660378	1.032943298	1.056453949	0.071581727	0.272384894	-0.595318735	-2.998020796	1.591873889	0.571095686	1.385954264	0.160759774	-0.603470624	0.424507616	0.030656506	-0.202310601	-0.998710851	-0.852346618	0.003405752	-1.902810954	-0.424507616	-0.636490883	0.098927729	-0.126347925	-0.696025208	-0.45451733	0.188425032	-0.902393588	0.477294855	-0.265322712	-0.329407333	0.216235289	0.523619123	0.315058297	-0.944119285	-0.804348643	1.790524917	-1.523165155	1.044626445	-1.385954264	-0.933535639	1.301946185	1.240815502	-0.064754379	0.758136008	0.023842473	0.619896262	0.181496015
GRMZM2G050917	1.068431117	-2.998020796	1.197842699	1.318010897	1.902810954	1.48107362	2.104600628	-0.085246759	0.417065588	-2.468001988	0.010217413	1.591873889	1.226239142	0.862182757	-2.249880663	-2.171527717	-2.104600628	1.286210621	-2.045954276	-1.993601218	0.83291742	0.722302208	-1.946202375	-1.902810954	0.315058297	-1.862731867	-1.790524917	-1.757666049	-1.726602201	-1.697120332	-0.023842473	-1.642224543	-1.616536998	0.45451733	1.501786817	-1.568142731	0.394875486	0.105775004	0.563095926	-1.523165155	-1.501786817	1.080563549	0.307908216	0.462083086	0.776421761	1.545263217	1.092857156	-1.48107362	1.825439172
GRMZM2G041724	1.080563549	-0.365586148	0.057930049	1.825439172	0.258273739	-0.571095686	-0.167663737	-0.188425032	-0.902393588	-2.998020796	-0.933535639	0.571095686	1.441453795	-0.044289159	-0.842592259	0.112627241	-0.579132162	-0.209267873	-0.500322766	0.372878156	-0.133217035	-1.255660378	1.568142731	0.223213218	-1.130769373	-1.092857156	0.394875486	1.301946185	-0.037471962	1.170380633	-2.468001988	0.767246816	0.823319923	-0.696025208	0.329407333	-0.35105981	-0.279460686	-0.216235289	0.696025208	0.579132162	-1.170380633	0.35105981	0.43197323	-0.539308633	0.776421761	0.563095926	0.085246759	-0.251237576	-2.171527717
GRMZM2G051522	-0.862182757	0.462083086	-1.568142731	0.051108415	-1.591873889	-1.862731867	1.790524917	-1.825439172	1.460977052	0.085246759	-0.954809756	0.402250065	0.555132042	-0.119484771	-2.468001988	0.265322712	-1.441453795	-1.403975696	-0.244213829	-1.697120332	-2.249880663	-0.767246816	-0.628171949	-0.45451733	1.068431117	-0.329407333	-0.696025208	2.998020796	0.661717677	1.946202375	0.037471962	0.394875486	1.862731867	-2.171527717	0.862182757	-1.422465003	-1.946202375	0.424507616	2.171527717	0.571095686	-0.74010031	0.417065588	1.240815502	1.902810954	2.045954276	0.842592259	0.336607179	2.249880663	0.785662535
GRMZM2G131467	0.794970891	-0.174575701	0.636490883	0.722302208	-0.119484771	-1.117953259	1.044626445	-0.030656506	-2.998020796	1.902810954	-0.500322766	0.258273739	0.372878156	0.563095926	-0.272384894	0.670220259	-0.636490883	0.071581727	-0.823319923	0.329407333	-0.146974467	1.318010897	-0.017029548	0.661717677	1.545263217	-0.998710851	-1.568142731	-0.902393588	-0.758136008	0.119484771	-0.315058297	-0.661717677	1.301946185	-0.987557182	-1.105318189	1.523165155	0.678771572	1.156974916	-0.696025208	-0.35105981	-0.202310601	-0.852346618	1.669043821	1.33442315	0.409646587	0.293654744	-0.010217413	-0.872103029	-0.112627241
GRMZM2G109526	0.687372812	-1.105318189	-0.09208509	-0.882109877	0.619896262	-0.6448541	0.954809756	-0.628171949	-1.460977052	0.051108415	-0.696025208	1.240815502	-0.315058297	0.105775004	-0.571095686	0.078412413	2.045954276	-0.579132162	0.064754379	-0.343824517	-1.117953259	-0.7490877	2.998020796	-0.933535639	1.422465003	0.424507616	0.83291742	-0.469675385	0.307908216	0.202310601	0.394875486	0.230202032	0.713488578	1.032943298	-0.523619123	0.785662535	1.351202935	1.403975696	0.112627241	-0.237202109	-1.902810954	-0.372878156	0.030656506	-1.170380633	0.539308633	0.010217413	-0.51582268	-0.195363108	0.071581727
GRMZM2G080129	-1.032943298	-0.484942137	-0.272384894	-0.424507616	0.336607179	0.785662535	0.6448541	-0.776421761	-2.998020796	1.286210621	-0.628171949	0.023842473	-1.044626445	1.032943298	-0.439462999	0.105775004	0.902393588	0.402250065	0.758136008	-0.174575701	-0.813797671	-1.021399468	-1.902810954	-1.270787244	-0.704730028	-0.35105981	0.45451733	-0.140092436	0.670220259	1.143773961	0.91267586	2.345104662	1.403975696	2.249880663	0.508057465	1.351202935	1.545263217	-0.74010031	-0.823319923	0.424507616	0.492617885	-0.965610478	1.368372038	0.555132042	-0.531447525	0.174575701	0.003405752	-0.696025208	1.226239142
GRMZM2G029685	-1.255660378	0.892205847	-0.387522319	-1.441453795	0.555132042	-1.270787244	-1.156974916	0.071581727	1.591873889	1.021399468	0.424507616	0.477294855	-0.51582268	-0.500322766	0.579132162	0.251237576	-0.336607179	-0.051108415	1.757666049	1.092857156	-0.023842473	-1.642224543	-0.696025208	0.43197323	0.933535639	0.571095686	-0.265322712	0.140092436	-0.258273739	0.300773842	0.003405752	-0.140092436	-0.484942137	-0.209267873	-1.385954264	0.882109877	0.678771572	1.032943298	-0.293654744	-0.731172307	-0.794970891	-0.563095926	0.603470624	0.010217413	-0.153863466	1.726602201	-1.068431117	-0.872103029	-1.056453949
GRMZM2G404056	1.591873889	0.057930049	1.862731867	-0.653262666	-0.119484771	0.105775004	0.272384894	-0.872103029	-1.825439172	-0.078412413	-0.230202032	0.704730028	-0.071581727	-0.146974467	-0.492617885	-0.469675385	0.439462999	0.051108415	-0.387522319	0.628171949	1.757666049	0.279460686	0.722302208	1.032943298	1.669043821	-0.417065588	0.547203211	0.508057465	0.987557182	-0.293654744	0.492617885	-0.251237576	0.611662814	-0.023842473	1.056453949	1.368372038	0.300773842	1.523165155	0.794970891	0.365586148	-0.258273739	-0.611662814	-1.523165155	-1.301946185	-0.195363108	0.731172307	0.842592259	-0.394875486	0.209267873
GRMZM2G064547	1.545263217	2.249880663	-0.057930049	-0.380190046	0.078412413	-0.823319923	-0.872103029	-1.591873889	-1.616536998	0.670220259	0.508057465	0.402250065	1.184000049	-1.825439172	0.636490883	-0.531447525	0.153863466	-0.272384894	-0.336607179	-0.439462999	-1.790524917	-0.181496015	-0.174575701	0.064754379	0.188425032	-0.882109877	1.460977052	2.171527717	1.616536998	0.758136008	1.080563549	-0.611662814	2.998020796	-1.726602201	-0.098927729	-0.813797671	-0.998710851	-0.09208509	0.603470624	1.726602201	-0.555132042	0.83291742	-0.146974467	0.272384894	2.345104662	0.944119285	-1.105318189	-0.329407333	0.230202032
GRMZM2G092910	0.126347925	0.35105981	1.184000049	1.422465003	0.010217413	-1.184000049	0.372878156	-2.045954276	2.998020796	0.365586148	-0.579132162	1.385954264	0.531447525	-1.105318189	-0.071581727	-1.044626445	-0.731172307	-0.424507616	1.255660378	-0.794970891	-1.068431117	-1.790524917	-0.098927729	-0.315058297	1.757666049	-1.255660378	-0.230202032	2.249880663	0.872103029	0.998710851	0.555132042	-0.030656506	0.469675385	-0.713488578	-0.446977502	-0.417065588	-0.286550499	1.117953259	-0.547203211	0.923055543	-0.91267586	-1.441453795	0.402250065	0.023842473	0.071581727	0.216235289	-0.976525035	-0.402250065	0.852346618
GRMZM2G457534	1.240815502	-0.140092436	-0.112627241	0.329407333	0.146974467	1.056453949	0.628171949	-0.336607179	-2.249880663	-0.160759774	-1.270787244	0.758136008	0.003405752	-0.372878156	-0.539308633	-0.272384894	0.670220259	1.318010897	0.098927729	0.892205847	-1.226239142	0.603470624	-2.045954276	0.804348643	-0.670220259	-1.021399468	0.010217413	-0.35105981	1.368372038	-0.044289159	1.825439172	0.6448541	0.064754379	-0.146974467	0.842592259	1.591873889	0.508057465	-1.156974916	-0.023842473	0.112627241	-0.216235289	-0.244213829	-1.385954264	-1.501786817	0.492617885	0.547203211	-0.852346618	0.037471962	-0.767246816
GRMZM2G059887	1.568142731	0.852346618	0.174575701	1.130769373	0.071581727	-0.286550499	1.197842699	-0.892205847	2.998020796	0.044289159	0.785662535	-0.181496015	-0.237202109	1.726602201	0.587206217	0.595318735	0.842592259	-1.48107362	0.678771572	-0.619896262	-1.993601218	-1.021399468	1.902810954	0.579132162	-0.209267873	-1.351202935	-0.078412413	1.117953259	0.704730028	0.037471962	-1.286210621	0.286550499	0.758136008	0.064754379	-0.251237576	0.628171949	-0.272384894	-1.197842699	-0.842592259	0.998710851	-0.713488578	-1.523165155	-0.6448541	1.080563549	-0.767246816	0.140092436	-0.085246759	-0.882109877	-0.758136008
GRMZM2G176085	0.794970891	-0.785662535	0.439462999	-2.998020796	0.539308633	-0.098927729	0.965610478	-0.998710851	0.74010031	-0.424507616	0.571095686	-0.603470624	0.872103029	-1.032943298	-1.286210621	1.170380633	0.057930049	1.270787244	0.126347925	0.119484771	-0.439462999	-0.484942137	0.258273739	1.092857156	0.823319923	-0.251237576	-0.74010031	1.790524917	0.223213218	1.642224543	-2.345104662	-0.446977502	-0.037471962	-0.167663737	-1.021399468	-0.195363108	0.098927729	-1.156974916	0.563095926	-0.358313528	-1.255660378	1.368372038	-2.249880663	-0.078412413	-0.237202109	1.616536998	-0.823319923	0.696025208	-0.085246759
GRMZM5G850640	1.211918765	-0.45451733	-1.825439172	0.944119285	-0.380190046	0.492617885	2.468001988	-2.045954276	-1.545263217	0.500322766	0.722302208	0.842592259	-0.051108415	-0.628171949	-0.188425032	0.195363108	1.48107362	0.767246816	0.462083086	-0.146974467	0.078412413	0.037471962	-1.385954264	-0.279460686	-0.954809756	0.523619123	-0.43197323	-1.197842699	-1.301946185	-0.653262666	-0.265322712	0.251237576	0.258273739	0.365586148	-2.249880663	-0.91267586	-0.394875486	1.143773961	-1.48107362	-0.230202032	0.882109877	-0.030656506	-1.616536998	-0.126347925	1.757666049	0.09208509	-0.933535639	-0.6448541	0.661717677
GRMZM2G021129	0.315058297	0.500322766	-0.336607179	1.117953259	0.387522319	-1.642224543	0.237202109	-0.767246816	-0.531447525	0.713488578	0.794970891	1.385954264	0.446977502	-0.394875486	-0.078412413	0.492617885	-0.265322712	0.223213218	-1.197842699	0.265322712	-1.790524917	-1.211918765	0.167663737	-0.209267873	0.146974467	-0.976525035	-0.678771572	0.785662535	-0.45451733	1.422465003	-0.484942137	-1.33442315	-0.071581727	-1.368372038	-0.146974467	0.279460686	-0.7490877	1.156974916	0.216235289	0.6448541	-0.469675385	-0.83291742	1.726602201	2.249880663	1.318010897	1.130769373	-0.842592259	0.409646587	0.862182757
GRMZM2G043338	0.439462999	2.045954276	1.726602201	0.767246816	0.230202032	0.965610478	-0.547203211	-0.661717677	1.056453949	0.372878156	0.051108415	0.758136008	-0.358313528	1.993601218	1.368372038	0.523619123	-0.402250065	1.318010897	0.500322766	0.085246759	0.402250065	0.023842473	-0.105775004	1.460977052	0.329407333	-1.021399468	0.181496015	0.813797671	0.167663737	-1.009990169	-0.531447525	-0.409646587	-1.642224543	1.143773961	1.403975696	-0.628171949	-1.197842699	0.563095926	0.636490883	0.43197323	-1.211918765	-1.591873889	-1.170380633	-2.104600628	-1.48107362	-0.653262666	-1.286210621	-1.946202375	-0.023842473
GRMZM2G430807	-0.998710851	-0.098927729	1.184000049	2.104600628	-0.064754379	-0.794970891	0.358313528	-1.318010897	-0.279460686	-0.954809756	1.130769373	-1.184000049	0.670220259	-2.998020796	0.45451733	-0.51582268	-0.636490883	-0.45451733	0.492617885	0.678771572	1.068431117	0.174575701	1.197842699	-1.441453795	1.460977052	0.804348643	-0.987557182	0.595318735	-0.687372812	0.603470624	0.057930049	0.230202032	0.251237576	-0.105775004	-0.492617885	-0.902393588	0.6448541	-1.021399468	0.469675385	0.286550499	-0.603470624	-0.628171949	-0.133217035	0.064754379	-0.424507616	0.244213829	0.336607179	-0.336607179	0.372878156
GRMZM2G028885	-0.394875486	0.902393588	1.044626445	1.184000049	0.017029548	1.697120332	0.74010031	0.713488578	-2.645701413	1.351202935	-0.446977502	-0.74010031	0.188425032	0.563095926	-2.468001988	-0.387522319	-0.767246816	-2.345104662	0.315058297	1.197842699	0.603470624	-0.555132042	-1.184000049	-0.085246759	0.678771572	1.056453949	-0.195363108	-0.882109877	-2.249880663	-0.057930049	-0.409646587	-0.167663737	0.057930049	-2.104600628	-0.251237576	2.645701413	-0.713488578	0.286550499	-0.571095686	1.021399468	1.48107362	0.531447525	-2.045954276	-0.439462999	0.153863466	0.813797671	-0.286550499	0.195363108	-0.315058297
GRMZM2G166089	1.156974916	-0.098927729	-0.462083086	1.726602201	0.687372812	0.300773842	0.174575701	-0.892205847	-2.998020796	0.484942137	-0.446977502	1.902810954	2.045954276	-1.318010897	-0.776421761	-0.35105981	0.83291742	0.272384894	-0.954809756	0.74010031	-0.722302208	-0.279460686	-2.104600628	0.933535639	0.469675385	-0.539308633	-0.477294855	-1.48107362	-0.174575701	-0.358313528	1.130769373	0.731172307	0.492617885	-1.33442315	1.862731867	0.923055543	0.7490877	-0.933535639	0.017029548	1.032943298	-0.188425032	0.078412413	-1.032943298	-0.619896262	0.722302208	1.211918765	-0.842592259	-0.300773842	-0.409646587
GRMZM2G700806	-0.174575701	1.143773961	-0.126347925	0.258273739	0.882109877	-0.944119285	0.83291742	-0.251237576	-1.184000049	-1.33442315	0.696025208	1.946202375	1.523165155	0.944119285	0.446977502	0.358313528	1.545263217	0.933535639	1.240815502	-0.209267873	-2.345104662	-0.767246816	0.174575701	0.223213218	0.140092436	-0.933535639	-0.6448541	-0.902393588	0.265322712	1.726602201	1.318010897	-1.368372038	0.387522319	-0.279460686	0.286550499	0.251237576	-1.130769373	-0.531447525	0.484942137	0.146974467	-0.882109877	1.184000049	2.104600628	0.661717677	0.523619123	0.758136008	-0.653262666	1.270787244	0.112627241
GRMZM2G370715	2.171527717	-1.255660378	-0.372878156	-0.017029548	1.240815502	2.249880663	-0.547203211	-0.484942137	-2.468001988	0.51582268	0.153863466	1.825439172	-0.293654744	-0.071581727	0.933535639	0.678771572	1.105318189	0.439462999	-1.270787244	0.387522319	0.91267586	0.722302208	-1.591873889	1.568142731	-0.636490883	0.057930049	1.130769373	-1.669043821	0.862182757	-0.944119285	-0.216235289	1.697120332	-0.237202109	-0.329407333	0.661717677	0.071581727	1.117953259	-1.545263217	-0.731172307	0.785662535	-0.417065588	-0.579132162	-0.83291742	-1.240815502	0.272384894	-0.603470624	-1.385954264	-1.044626445	-0.998710851
GRMZM2G424491	1.270787244	0.167663737	0.272384894	1.130769373	1.946202375	1.351202935	-0.813797671	0.343824517	-0.230202032	1.591873889	0.209267873	1.862731867	-1.156974916	-0.307908216	1.080563549	1.105318189	1.170380633	0.293654744	1.403975696	0.933535639	-1.240815502	-0.417065588	-0.085246759	1.068431117	0.223213218	-0.571095686	0.51582268	1.422465003	1.032943298	-0.882109877	0.954809756	1.009990169	1.790524917	-2.249880663	1.044626445	1.368372038	0.133217035	-1.422465003	-2.468001988	0.852346618	-0.842592259	-1.825439172	0.713488578	-0.477294855	0.417065588	-0.051108415	-0.6448541	-1.523165155	-1.318010897
GRMZM2G109480	1.48107362	1.902810954	0.380190046	0.078412413	0.112627241	0.670220259	0.539308633	-1.48107362	-0.713488578	-0.579132162	-0.83291742	-0.424507616	0.531447525	1.301946185	-1.368372038	-0.547203211	1.044626445	-0.098927729	0.882109877	-0.944119285	-0.636490883	-0.492617885	0.696025208	0.126347925	1.993601218	-0.119484771	0.300773842	1.021399468	0.492617885	0.085246759	2.171527717	1.385954264	2.249880663	0.057930049	1.568142731	-0.146974467	0.279460686	1.080563549	-1.697120332	0.258273739	0.119484771	-0.619896262	-0.251237576	-0.987557182	-1.130769373	-0.954809756	0.976525035	0.722302208	-0.037471962
GRMZM2G081668	-0.758136008	0.587206217	-2.998020796	0.402250065	0.098927729	-2.645701413	-2.468001988	-0.010217413	0.365586148	-0.43197323	-0.51582268	0.776421761	0.462083086	0.678771572	-2.249880663	-0.83291742	-0.776421761	-0.387522319	1.946202375	0.954809756	-0.167663737	0.51582268	-0.017029548	-0.619896262	0.329407333	1.591873889	-2.104600628	-2.045954276	-1.993601218	0.380190046	0.251237576	0.279460686	-1.946202375	-1.902810954	0.105775004	1.255660378	0.619896262	1.545263217	1.092857156	-1.862731867	-1.825439172	1.240815502	0.998710851	0.74010031	0.823319923	1.068431117	-0.531447525	-0.209267873	-0.237202109
GRMZM5G868757	0.322224522	-0.813797671	-0.500322766	0.477294855	0.140092436	0.547203211	0.523619123	-1.301946185	-2.998020796	0.202310601	-2.045954276	-0.017029548	1.902810954	-0.587206217	-1.044626445	-0.965610478	0.446977502	0.862182757	-0.531447525	1.301946185	-0.315058297	-1.032943298	-1.825439172	-0.146974467	0.244213829	-0.892205847	-0.852346618	-0.6448541	-0.140092436	0.611662814	0.987557182	-0.112627241	-0.057930049	-0.571095686	0.223213218	-0.105775004	0.7490877	-1.080563549	-0.010217413	1.385954264	-0.462083086	-0.071581727	0.722302208	-0.085246759	0.852346618	1.156974916	-0.477294855	0.387522319	0.539308633
AC208110.2_FG006	2.171527717	-0.611662814	-0.307908216	1.48107362	0.244213829	1.286210621	-0.153863466	-0.571095686	-1.790524917	1.902810954	0.286550499	1.422465003	-0.358313528	0.813797671	1.501786817	1.240815502	1.368372038	1.032943298	-0.713488578	0.343824517	-1.092857156	-0.258273739	-1.48107362	0.571095686	0.696025208	0.555132042	1.105318189	-0.244213829	0.794970891	-0.146974467	0.704730028	2.998020796	1.351202935	-0.587206217	2.468001988	-0.439462999	1.825439172	-0.003405752	-1.642224543	-1.301946185	-0.579132162	-1.318010897	-1.197842699	-1.523165155	0.531447525	-1.993601218	-0.35105981	0.216235289	-0.563095926
GRMZM2G126481	-2.998020796	1.068431117	-2.645701413	0.43197323	1.156974916	0.336607179	-2.468001988	-2.345104662	0.057930049	-2.171527717	1.021399468	-0.315058297	-2.104600628	-0.237202109	-1.993601218	-0.244213829	-1.946202375	-1.902810954	-1.862731867	0.446977502	1.385954264	1.790524917	0.322224522	-0.365586148	0.696025208	0.678771572	0.595318735	-1.825439172	-1.790524917	-1.757666049	-0.167663737	0.078412413	-0.258273739	-1.669043821	0.174575701	0.402250065	-1.642224543	1.568142731	-1.616536998	-1.591873889	0.387522319	0.794970891	-1.568142731	-1.545263217	-0.329407333	-0.057930049	-1.523165155	0.230202032	0.010217413
GRMZM2G055545	-2.998020796	0.064754379	1.270787244	0.722302208	0.202310601	0.91267586	0.758136008	-0.265322712	-2.645701413	-2.468001988	0.902393588	-2.345104662	-2.249880663	-0.140092436	-2.104600628	-0.167663737	-0.244213829	-2.045954276	1.105318189	0.315058297	0.010217413	0.842592259	-0.223213218	-1.946202375	0.587206217	-1.902810954	0.687372812	0.767246816	-1.862731867	2.045954276	-0.126347925	-1.790524917	-0.209267873	-1.669043821	-0.279460686	-1.642224543	0.329407333	-0.230202032	-1.591873889	0.439462999	0.409646587	0.731172307	0.508057465	1.501786817	-1.568142731	0.823319923	-0.071581727	-1.545263217	1.286210621
GRMZM2G037193	0.085246759	0.619896262	0.804348643	-1.441453795	0.251237576	-2.104600628	1.726602201	-0.965610478	0.892205847	-1.240815502	-0.83291742	0.446977502	1.460977052	-1.591873889	-0.531447525	-0.508057465	-1.697120332	-0.813797671	1.032943298	0.380190046	-0.74010031	-0.595318735	-0.365586148	-0.265322712	1.403975696	-1.790524917	-1.368372038	1.318010897	0.003405752	0.571095686	0.35105981	-1.726602201	-1.270787244	-2.171527717	1.501786817	0.6448541	0.547203211	-0.842592259	1.523165155	1.441453795	-0.6448541	1.616536998	1.825439172	0.336607179	2.998020796	1.056453949	-0.804348643	0.209267873	-0.153863466
AC204292.4_FG002	0.279460686	-1.056453949	-0.902393588	0.508057465	-0.492617885	-1.021399468	-1.105318189	-0.258273739	-0.823319923	-0.09208509	0.078412413	-0.380190046	0.882109877	-1.211918765	-0.35105981	0.085246759	1.032943298	-0.181496015	-2.468001988	-0.555132042	-0.758136008	0.329407333	0.933535639	0.424507616	0.098927729	0.696025208	-0.315058297	0.387522319	-0.293654744	0.064754379	0.965610478	0.611662814	1.044626445	-0.882109877	-0.944119285	-0.336607179	1.862731867	1.105318189	-0.722302208	0.372878156	-1.117953259	-0.126347925	-1.501786817	-1.080563549	0.174575701	0.987557182	-1.197842699	-1.270787244	1.726602201
GRMZM2G405581	-0.372878156	0.6448541	0.409646587	-0.358313528	-0.380190046	-0.794970891	1.368372038	-0.160759774	2.998020796	0.380190046	0.279460686	-0.74010031	-0.174575701	0.160759774	0.286550499	0.202310601	0.064754379	-1.105318189	1.080563549	-1.351202935	-1.460977052	-1.48107362	0.872103029	-0.882109877	0.91267586	-0.508057465	-0.731172307	1.946202375	0.579132162	0.523619123	-1.441453795	0.209267873	-0.462083086	-0.017029548	-1.170380633	0.531447525	0.051108415	0.954809756	-0.998710851	1.697120332	-0.45451733	-0.43197323	-0.315058297	0.017029548	0.372878156	-0.112627241	-0.862182757	-1.902810954	0.126347925
GRMZM2G127035	-1.170380633	1.403975696	-0.508057465	0.678771572	1.117953259	-0.439462999	1.351202935	-1.422465003	1.946202375	-1.092857156	-0.085246759	1.523165155	1.105318189	-0.181496015	-0.696025208	-0.279460686	-0.902393588	0.09208509	1.170380633	-0.112627241	-0.195363108	-0.595318735	0.51582268	-1.351202935	-2.998020796	0.842592259	-0.484942137	-0.336607179	-0.862182757	0.933535639	0.813797671	1.143773961	-0.523619123	-0.722302208	-1.460977052	-0.394875486	-0.380190046	1.197842699	-1.184000049	0.767246816	-0.74010031	0.611662814	0.785662535	1.825439172	1.501786817	1.862731867	-0.417065588	-0.987557182	1.422465003
GRMZM2G078164	1.226239142	0.167663737	-0.051108415	-0.195363108	1.545263217	-0.237202109	0.300773842	-2.998020796	2.998020796	0.45451733	0.153863466	1.318010897	1.697120332	-0.872103029	0.140092436	0.265322712	-0.044289159	-0.531447525	1.616536998	0.758136008	-0.571095686	-0.258273739	0.372878156	-0.030656506	0.539308633	-0.202310601	0.402250065	1.460977052	1.591873889	0.823319923	0.587206217	0.030656506	0.547203211	-0.223213218	0.687372812	0.044289159	-0.286550499	1.255660378	0.862182757	1.130769373	-0.402250065	-1.33442315	0.195363108	-0.767246816	0.882109877	-1.170380633	-0.462083086	-0.758136008	0.998710851
GRMZM2G397684	-0.508057465	0.35105981	0.358313528	-0.563095926	-0.653262666	-0.272384894	-0.329407333	0.731172307	1.226239142	-0.555132042	0.539308633	0.687372812	1.032943298	-0.785662535	-1.044626445	-1.211918765	-0.017029548	0.230202032	-1.946202375	-0.188425032	0.380190046	-2.249880663	-0.603470624	-0.216235289	1.726602201	0.307908216	1.669043821	0.571095686	0.286550499	-1.368372038	-0.279460686	-0.071581727	-0.823319923	-0.181496015	0.595318735	-0.237202109	0.484942137	0.902393588	1.501786817	0.044289159	-0.944119285	-0.09208509	1.697120332	-0.064754379	0.653262666	0.45451733	0.74010031	0.424507616	0.017029548
GRMZM2G177792	1.501786817	0.804348643	0.45451733	0.030656506	-0.500322766	0.105775004	-0.153863466	0.202310601	-0.244213829	-0.842592259	-0.160759774	0.603470624	-0.508057465	-0.336607179	1.403975696	-0.424507616	0.628171949	-0.293654744	-0.372878156	-0.571095686	1.669043821	1.385954264	-0.872103029	1.156974916	0.842592259	1.523165155	-1.441453795	-0.933535639	0.547203211	-0.023842473	-0.579132162	-0.987557182	-1.044626445	0.944119285	-0.380190046	-0.258273739	0.044289159	0.35105981	0.023842473	-1.351202935	-1.642224543	-1.255660378	0.174575701	0.343824517	0.987557182	-2.104600628	-1.318010897	0.484942137	0.696025208
GRMZM2G026892	-0.872103029	-1.021399468	-1.143773961	-0.181496015	1.105318189	-0.933535639	-0.209267873	-1.993601218	-2.104600628	-0.167663737	-1.068431117	0.105775004	0.731172307	-1.545263217	-1.48107362	-2.045954276	-0.140092436	-0.462083086	0.987557182	-0.315058297	-0.417065588	-0.322224522	-1.568142731	-1.009990169	0.508057465	-0.484942137	-1.170380633	-1.460977052	1.068431117	1.170380633	1.351202935	0.307908216	1.318010897	-0.286550499	0.394875486	0.998710851	-0.823319923	-0.923055543	-0.133217035	0.098927729	-0.272384894	0.119484771	0.424507616	-0.424507616	-0.112627241	1.591873889	-0.531447525	-0.174575701	-0.571095686
AC196475.3_FG004	1.117953259	0.619896262	0.767246816	-0.51582268	-0.003405752	-1.403975696	0.571095686	-0.140092436	0.882109877	-0.722302208	0.146974467	0.140092436	1.403975696	-1.825439172	0.174575701	-0.852346618	-1.501786817	-0.237202109	-0.776421761	0.365586148	-0.167663737	-1.301946185	-0.146974467	0.380190046	0.696025208	-0.731172307	-1.240815502	-0.417065588	-0.307908216	0.902393588	-1.021399468	-0.794970891	0.933535639	-2.249880663	0.446977502	-0.653262666	0.603470624	0.862182757	0.7490877	0.372878156	-0.954809756	0.842592259	-0.358313528	-0.160759774	0.563095926	1.616536998	-1.726602201	-1.33442315	-0.704730028
GRMZM2G072682	0.696025208	1.825439172	0.74010031	-0.023842473	1.156974916	-0.146974467	-1.032943298	-2.104600628	-2.998020796	0.776421761	-0.469675385	0.402250065	0.051108415	-0.902393588	-0.7490877	-0.872103029	0.037471962	-1.068431117	1.368372038	0.571095686	-2.345104662	-0.74010031	-1.197842699	0.003405752	-0.237202109	0.010217413	-0.661717677	0.45451733	-1.143773961	1.226239142	1.170380633	0.531447525	0.439462999	0.484942137	0.181496015	-1.170380633	0.064754379	0.944119285	1.032943298	1.642224543	0.508057465	-0.619896262	-0.976525035	-0.417065588	-1.044626445	1.862731867	-0.322224522	0.804348643	0.965610478
GRMZM2G042933	0.595318735	-0.119484771	1.056453949	-0.315058297	-0.758136008	0.823319923	0.424507616	0.209267873	2.171527717	1.422465003	-0.508057465	1.068431117	1.211918765	0.126347925	1.130769373	-0.439462999	0.83291742	0.508057465	0.954809756	0.785662535	1.092857156	0.687372812	1.642224543	0.188425032	0.477294855	-0.126347925	-0.603470624	0.030656506	-0.776421761	0.43197323	-0.43197323	0.105775004	-0.923055543	-1.351202935	1.170380633	1.441453795	0.315058297	0.223213218	1.270787244	0.571095686	-0.417065588	0.563095926	-1.568142731	0.195363108	0.387522319	1.33442315	-1.240815502	0.146974467	-0.133217035
GRMZM2G010056	0.424507616	0.300773842	-1.197842699	1.523165155	-0.823319923	1.226239142	-0.508057465	-1.351202935	-1.255660378	-0.91267586	-0.358313528	0.998710851	0.91267586	1.825439172	-0.661717677	0.500322766	1.441453795	0.402250065	-0.439462999	0.188425032	1.117953259	-0.044289159	-1.862731867	0.023842473	-0.133217035	1.130769373	-0.160759774	-2.171527717	-0.098927729	0.322224522	-0.767246816	-0.146974467	-0.153863466	2.645701413	-0.387522319	-0.174575701	-0.902393588	-1.240815502	0.484942137	-0.555132042	-0.484942137	-0.424507616	-0.45451733	-1.226239142	0.469675385	0.258273739	0.653262666	0.119484771	0.017029548
GRMZM2G069092	2.045954276	1.080563549	1.143773961	-0.394875486	0.704730028	0.804348643	0.153863466	-1.697120332	-0.167663737	0.223213218	0.842592259	1.902810954	0.300773842	0.508057465	0.595318735	-1.021399468	0.216235289	0.358313528	-0.484942137	-0.424507616	-0.965610478	-0.923055543	-0.417065588	-0.531447525	0.531447525	-0.852346618	0.555132042	0.998710851	1.616536998	0.661717677	1.240815502	1.501786817	1.460977052	-2.045954276	0.653262666	-0.202310601	-1.33442315	1.156974916	0.976525035	2.171527717	-0.446977502	0.409646587	0.776421761	-1.156974916	0.279460686	0.523619123	0.882109877	-0.230202032	-0.078412413
GRMZM2G082087	0.286550499	0.813797671	0.563095926	0.098927729	1.441453795	-1.255660378	-0.167663737	-0.892205847	2.104600628	0.842592259	0.279460686	1.545263217	2.171527717	-1.523165155	-0.223213218	0.265322712	-1.403975696	-1.385954264	-0.315058297	-0.372878156	-2.645701413	-1.422465003	1.616536998	0.322224522	0.409646587	-0.882109877	-0.105775004	1.385954264	1.130769373	1.726602201	-0.500322766	0.071581727	0.547203211	-2.468001988	0.037471962	-0.998710851	-0.965610478	-0.343824517	0.954809756	0.923055543	-1.501786817	0.767246816	1.021399468	0.424507616	1.460977052	1.993601218	-1.143773961	-1.286210621	0.500322766
GRMZM2G058013	1.422465003	-0.477294855	-0.315058297	-0.293654744	0.446977502	-0.813797671	0.064754379	-1.056453949	-2.104600628	1.068431117	0.628171949	0.293654744	0.394875486	-0.785662535	0.272384894	0.687372812	0.003405752	-0.146974467	-0.462083086	0.343824517	-1.501786817	-0.380190046	-0.329407333	0.477294855	1.318010897	0.804348643	1.545263217	0.508057465	1.009990169	1.170380633	1.105318189	1.460977052	1.044626445	-1.993601218	0.244213829	-0.160759774	1.48107362	1.032943298	0.057930049	-0.51582268	-0.555132042	-0.119484771	1.993601218	-0.409646587	0.619896262	1.211918765	0.923055543	0.595318735	0.531447525
GRMZM2G060481	0.670220259	1.156974916	0.469675385	0.010217413	-0.358313528	-2.998020796	-2.645701413	1.726602201	-2.345104662	0.258273739	-0.35105981	0.976525035	-0.223213218	-2.171527717	-2.104600628	-2.045954276	0.91267586	0.842592259	-1.993601218	0.45451733	1.441453795	-1.946202375	0.023842473	0.446977502	0.813797671	-1.902810954	-1.862731867	-0.126347925	-1.825439172	-0.251237576	0.044289159	-1.757666049	-1.697120332	-0.237202109	-1.669043821	-1.642224543	0.687372812	-1.616536998	-1.591873889	-1.568142731	0.181496015	0.51582268	-1.545263217	0.09208509	-1.523165155	0.794970891	-0.230202032	0.272384894	-1.501786817
GRMZM2G472945	1.197842699	0.322224522	1.170380633	1.368372038	0.181496015	1.080563549	0.112627241	-1.044626445	1.993601218	0.195363108	0.409646587	-0.523619123	-0.329407333	0.852346618	-0.531447525	1.240815502	1.591873889	-0.595318735	0.265322712	-0.153863466	-1.143773961	-0.112627241	0.293654744	0.678771572	0.731172307	0.09208509	-0.195363108	0.579132162	0.547203211	0.758136008	1.021399468	1.501786817	0.872103029	-1.368372038	1.009990169	0.933535639	-0.767246816	-0.064754379	-2.045954276	2.045954276	-0.446977502	-1.286210621	-1.021399468	-0.380190046	-0.174575701	-0.146974467	-0.044289159	-1.184000049	-0.336607179
GRMZM2G337330	-1.044626445	-0.140092436	-0.216235289	-0.174575701	-0.09208509	-1.642224543	0.439462999	-2.645701413	1.790524917	-0.078412413	0.987557182	-0.244213829	1.726602201	-0.731172307	-0.402250065	0.174575701	-1.009990169	-0.329407333	-0.322224522	-1.068431117	-0.923055543	-0.813797671	-0.7490877	-0.085246759	0.160759774	-0.146974467	-0.462083086	1.501786817	0.044289159	1.591873889	-0.343824517	-0.722302208	1.092857156	-1.351202935	0.713488578	-1.056453949	-1.697120332	1.642224543	0.954809756	0.83291742	-0.713488578	0.307908216	1.862731867	2.045954276	1.993601218	0.882109877	-0.636490883	1.068431117	-0.653262666
GRMZM2G144853	-0.057930049	1.044626445	0.188425032	0.670220259	-0.146974467	-0.044289159	0.696025208	-1.523165155	2.998020796	-0.83291742	-0.500322766	-0.619896262	-0.636490883	-0.272384894	-0.230202032	0.223213218	-2.045954276	-1.946202375	1.501786817	-0.023842473	0.237202109	-0.987557182	1.726602201	-0.358313528	-0.696025208	0.003405752	-0.064754379	0.944119285	0.358313528	-0.954809756	-1.009990169	-1.211918765	-0.813797671	-0.91267586	0.35105981	-0.492617885	-1.697120332	1.286210621	1.270787244	1.403975696	0.571095686	-1.568142731	-0.365586148	0.579132162	-1.226239142	-0.105775004	1.523165155	-0.776421761	1.156974916
GRMZM2G422750	1.143773961	0.105775004	1.669043821	-0.74010031	1.170380633	0.998710851	0.051108415	-1.545263217	2.645701413	0.619896262	0.882109877	-0.133217035	0.071581727	0.044289159	1.226239142	1.032943298	0.976525035	-0.003405752	1.255660378	-0.571095686	0.372878156	1.080563549	0.446977502	0.237202109	-0.409646587	0.43197323	1.286210621	1.825439172	1.862731867	1.523165155	0.944119285	0.628171949	0.892205847	-0.167663737	-1.825439172	-0.636490883	-1.501786817	0.523619123	-2.998020796	0.394875486	-1.197842699	-2.171527717	0.09208509	-0.628171949	-0.329407333	-0.336607179	-0.071581727	-1.48107362	-0.603470624
GRMZM2G170602	1.032943298	0.387522319	0.813797671	0.954809756	0.722302208	1.33442315	1.726602201	0.085246759	1.523165155	2.171527717	-1.240815502	0.611662814	0.758136008	0.209267873	-0.244213829	-0.037471962	1.642224543	0.713488578	0.279460686	-0.010217413	-1.862731867	-0.279460686	-0.571095686	-0.965610478	-0.91267586	-0.678771572	0.010217413	0.785662535	1.286210621	1.105318189	-0.343824517	-0.112627241	-1.170380633	-1.726602201	-1.080563549	-0.722302208	1.368372038	-2.998020796	1.460977052	0.35105981	1.48107362	0.380190046	0.216235289	-0.731172307	-0.160759774	0.619896262	0.595318735	0.140092436	-1.616536998
GRMZM2G157825	1.105318189	-1.286210621	0.300773842	-0.595318735	0.307908216	-0.653262666	-0.329407333	-0.358313528	2.345104662	-1.056453949	0.140092436	-0.45451733	0.071581727	-0.670220259	0.010217413	0.380190046	0.160759774	0.539308633	0.112627241	-0.085246759	-0.315058297	-0.477294855	1.170380633	-0.153863466	-0.112627241	-0.43197323	-0.251237576	-1.33442315	-0.944119285	1.080563549	-0.523619123	-0.181496015	0.023842473	0.244213829	-0.174575701	0.804348643	0.133217035	-2.249880663	-0.003405752	0.358313528	-0.678771572	-1.422465003	0.322224522	-0.539308633	-0.492617885	-0.882109877	-1.385954264	0.469675385	0.044289159
GRMZM2G126957	-2.249880663	0.078412413	1.441453795	-1.642224543	-0.813797671	0.813797671	0.417065588	-0.085246759	-1.591873889	-0.300773842	-1.825439172	-0.329407333	-0.944119285	0.322224522	0.195363108	-1.757666049	0.713488578	2.249880663	1.385954264	0.687372812	-1.255660378	-1.351202935	-1.009990169	0.731172307	0.758136008	-1.197842699	-0.293654744	0.358313528	-0.45451733	-0.713488578	-0.628171949	-0.7490877	-0.216235289	-0.611662814	-1.184000049	-1.568142731	-1.368372038	0.279460686	-0.044289159	0.933535639	-0.119484771	-0.140092436	-0.954809756	-1.270787244	-0.965610478	-0.030656506	-0.244213829	0.044289159	-0.469675385
GRMZM2G104955	0.181496015	0.387522319	-0.387522319	0.336607179	0.085246759	0.579132162	0.119484771	1.545263217	-2.998020796	2.171527717	-0.91267586	1.726602201	1.318010897	-0.823319923	-0.944119285	-0.244213829	-0.563095926	0.064754379	0.704730028	-0.153863466	1.862731867	1.301946185	-2.171527717	0.112627241	-0.462083086	-1.422465003	-0.892205847	-1.080563549	0.35105981	-0.579132162	1.044626445	0.195363108	-0.882109877	-0.343824517	1.130769373	0.731172307	0.882109877	0.555132042	0.315058297	0.071581727	0.010217413	0.237202109	-1.757666049	-2.345104662	0.7490877	0.394875486	-1.501786817	0.571095686	-0.329407333
GRMZM2G138053	-0.492617885	0.636490883	-0.286550499	0.678771572	0.508057465	-0.842592259	0.174575701	-0.531447525	-1.197842699	0.91267586	0.500322766	0.030656506	0.462083086	0.74010031	-0.555132042	0.329407333	-0.477294855	-1.092857156	2.345104662	-0.078412413	-1.757666049	-1.143773961	0.7490877	-0.023842473	-1.591873889	-0.43197323	-2.645701413	0.044289159	-1.790524917	-0.244213829	0.105775004	1.240815502	-0.462083086	-1.385954264	-0.202310601	0.010217413	-0.882109877	-0.105775004	-0.365586148	0.628171949	-0.611662814	0.133217035	1.993601218	1.032943298	-0.044289159	1.368372038	-0.322224522	-0.237202109	0.336607179
GRMZM2G046288	0.882109877	-1.032943298	-0.380190046	0.372878156	2.345104662	0.329407333	1.385954264	0.902393588	-2.345104662	2.645701413	0.776421761	0.722302208	1.156974916	-0.307908216	0.237202109	0.670220259	0.862182757	0.394875486	0.071581727	1.105318189	-1.226239142	-1.197842699	-1.790524917	1.211918765	0.322224522	0.469675385	1.117953259	0.892205847	-1.105318189	0.804348643	1.460977052	1.946202375	-0.167663737	-0.704730028	-0.402250065	1.825439172	0.003405752	-0.258273739	-0.731172307	0.300773842	-1.117953259	-0.758136008	0.258273739	1.130769373	-0.547203211	0.133217035	0.439462999	0.731172307	0.146974467
GRMZM2G379179	1.130769373	1.170380633	0.758136008	-0.223213218	0.794970891	-1.211918765	0.251237576	-2.249880663	2.645701413	1.351202935	0.098927729	1.862731867	1.460977052	-0.767246816	1.068431117	0.003405752	-0.687372812	-0.387522319	-0.174575701	-0.43197323	-0.112627241	-2.045954276	-0.044289159	-0.119484771	1.156974916	0.372878156	-0.322224522	0.6448541	-0.251237576	0.387522319	-1.790524917	-0.037471962	-0.653262666	-0.071581727	0.439462999	-1.441453795	0.307908216	0.216235289	-1.825439172	0.119484771	-2.998020796	-0.722302208	0.933535639	0.987557182	1.032943298	1.616536998	-1.616536998	-0.83291742	0.477294855
GRMZM2G317386	0.037471962	1.368372038	0.112627241	-0.237202109	-0.43197323	-1.255660378	0.965610478	-0.767246816	1.143773961	-0.439462999	-0.329407333	1.902810954	1.240815502	-0.872103029	0.902393588	-0.153863466	0.098927729	-0.477294855	-0.944119285	0.678771572	0.892205847	-0.804348643	0.603470624	0.394875486	1.117953259	-0.987557182	0.051108415	1.825439172	-1.044626445	1.068431117	-2.998020796	-2.645701413	-0.358313528	-2.345104662	-1.616536998	0.119484771	0.500322766	0.767246816	1.790524917	0.188425032	-2.249880663	-0.365586148	-0.265322712	-1.403975696	-0.636490883	0.023842473	-1.170380633	-0.112627241	1.056453949
GRMZM5G819140	0.286550499	1.286210621	0.852346618	0.653262666	-0.813797671	-0.167663737	-2.998020796	0.167663737	-2.468001988	1.211918765	0.976525035	0.944119285	-0.017029548	-0.785662535	-0.195363108	-0.329407333	-0.174575701	-2.249880663	0.704730028	0.387522319	1.032943298	0.251237576	1.021399468	-0.153863466	0.547203211	1.318010897	-0.209267873	0.140092436	-0.223213218	0.146974467	0.010217413	0.293654744	0.329407333	-2.045954276	0.153863466	1.460977052	0.098927729	2.345104662	-1.993601218	0.713488578	0.882109877	-0.722302208	-1.946202375	0.030656506	-0.051108415	-0.43197323	-1.902810954	-1.862731867	-0.037471962
AC194965.4_FG004	-0.372878156	-1.946202375	0.603470624	0.462083086	-0.7490877	-0.51582268	0.017029548	1.757666049	-0.539308633	0.329407333	-1.642224543	0.954809756	0.823319923	-0.776421761	1.993601218	-1.080563549	-0.105775004	0.380190046	-2.998020796	0.071581727	0.279460686	-0.45451733	0.35105981	0.315058297	1.568142731	0.051108415	-0.965610478	1.170380633	0.500322766	-0.358313528	-0.195363108	-0.251237576	1.044626445	-0.571095686	0.167663737	-0.300773842	-1.286210621	-1.825439172	-0.365586148	0.923055543	-1.545263217	-1.301946185	0.484942137	-1.143773961	-0.237202109	0.387522319	-0.944119285	-0.704730028	-0.140092436
GRMZM2G105233	-1.068431117	-1.092857156	-0.547203211	-0.126347925	1.184000049	0.571095686	-0.785662535	0.862182757	-2.998020796	-0.394875486	-0.424507616	-2.645701413	1.545263217	1.460977052	0.547203211	0.587206217	1.669043821	0.508057465	-0.531447525	-0.882109877	-0.661717677	-2.345104662	-1.351202935	-0.954809756	0.023842473	-0.188425032	-0.687372812	0.057930049	-0.35105981	-0.085246759	-0.477294855	-1.48107362	-1.422465003	-1.286210621	-0.446977502	-0.976525035	0.555132042	0.174575701	-1.197842699	-0.09208509	1.021399468	1.117953259	2.104600628	1.697120332	1.156974916	2.345104662	-0.140092436	0.446977502	1.616536998
GRMZM2G019446	0.531447525	0.153863466	0.872103029	0.508057465	1.092857156	-0.74010031	0.7490877	0.188425032	-0.037471962	0.315058297	-0.492617885	0.842592259	1.270787244	-0.258273739	-0.804348643	-0.500322766	-0.293654744	-0.044289159	-0.902393588	-1.286210621	-0.064754379	0.619896262	1.056453949	1.351202935	0.462083086	-0.051108415	0.492617885	0.976525035	-0.892205847	0.987557182	-0.628171949	-1.021399468	0.358313528	-0.057930049	0.661717677	0.216235289	0.010217413	2.998020796	-2.104600628	1.616536998	0.098927729	0.167663737	0.539308633	0.343824517	0.587206217	-1.226239142	-0.852346618	1.197842699	0.51582268
GRMZM2G510387	0.010217413	-0.51582268	0.387522319	-0.085246759	-1.068431117	-1.056453949	-0.892205847	1.184000049	-0.91267586	0.251237576	1.545263217	0.469675385	-0.7490877	-0.965610478	0.230202032	0.670220259	-0.842592259	-1.33442315	0.731172307	0.547203211	0.078412413	0.35105981	2.249880663	-1.501786817	-0.300773842	0.167663737	-0.017029548	1.616536998	-1.211918765	1.009990169	0.902393588	0.794970891	0.595318735	-0.387522319	-0.223213218	0.195363108	-0.174575701	1.993601218	1.286210621	0.017029548	-0.661717677	-0.023842473	-0.195363108	-1.044626445	0.216235289	-1.170380633	-0.380190046	0.813797671	0.555132042
GRMZM2G099317	-0.35105981	-0.758136008	-0.402250065	1.301946185	0.7490877	0.862182757	0.653262666	-0.767246816	-0.687372812	0.380190046	0.237202109	-0.119484771	-0.409646587	0.315058297	-1.211918765	0.713488578	0.023842473	-0.057930049	2.998020796	-0.195363108	-0.462083086	0.587206217	-0.439462999	-0.628171949	0.696025208	-0.307908216	-0.862182757	-0.619896262	-0.380190046	-1.156974916	-0.365586148	-1.021399468	-0.300773842	-1.946202375	0.446977502	-0.315058297	-1.368372038	-0.010217413	-1.240815502	0.167663737	-0.51582268	-0.051108415	0.112627241	-0.181496015	0.010217413	0.539308633	0.83291742	-0.153863466	0.628171949
GRMZM2G305582	0.813797671	0.098927729	0.258273739	0.237202109	0.35105981	-0.722302208	0.965610478	-0.731172307	1.523165155	0.852346618	1.143773961	1.669043821	0.603470624	0.017029548	0.923055543	0.636490883	-0.571095686	-1.669043821	0.300773842	-0.547203211	-0.862182757	-1.021399468	1.33442315	0.587206217	0.43197323	-0.329407333	-0.417065588	1.460977052	-0.315058297	0.555132042	-0.35105981	0.508057465	0.307908216	-0.628171949	0.078412413	-0.636490883	-0.976525035	0.687372812	-1.385954264	1.130769373	-2.249880663	-0.174575701	0.394875486	0.286550499	-0.343824517	0.862182757	-1.184000049	0.044289159	0.619896262
AC185226.4_FG001	2.171527717	-0.539308633	-0.469675385	1.33442315	0.852346618	0.409646587	-0.45451733	0.387522319	-2.998020796	1.170380633	0.119484771	0.174575701	0.492617885	-0.661717677	0.195363108	0.758136008	0.636490883	0.902393588	-1.568142731	0.45451733	-0.83291742	1.545263217	-1.825439172	0.661717677	0.272384894	0.446977502	1.240815502	-1.460977052	-0.492617885	-0.188425032	0.037471962	0.813797671	0.394875486	-0.944119285	0.823319923	1.318010897	1.460977052	-0.965610478	0.462083086	-0.010217413	1.403975696	-0.35105981	-0.813797671	-0.852346618	-0.071581727	-0.037471962	-0.804348643	-0.446977502	-0.987557182
GRMZM2G118437	-0.336607179	-0.571095686	-2.998020796	-0.098927729	-2.645701413	0.195363108	-0.547203211	0.307908216	-2.345104662	-2.249880663	-0.017029548	2.171527717	-0.477294855	0.051108415	0.842592259	0.35105981	0.611662814	0.555132042	1.757666049	-0.133217035	-2.171527717	-0.563095926	0.477294855	-0.523619123	-2.104600628	-2.045954276	-0.619896262	0.358313528	-0.387522319	-0.160759774	-0.209267873	0.174575701	-0.315058297	-0.636490883	0.74010031	0.687372812	-0.105775004	-1.825439172	0.279460686	2.645701413	0.394875486	0.315058297	0.085246759	1.422465003	1.790524917	1.156974916	0.696025208	1.642224543	0.563095926
GRMZM2G113232	1.757666049	-0.322224522	-0.539308633	0.365586148	0.892205847	1.368372038	0.279460686	-0.078412413	-2.645701413	1.441453795	-0.7490877	1.726602201	0.722302208	-0.500322766	-0.469675385	-0.587206217	1.211918765	0.976525035	-1.33442315	0.023842473	0.439462999	1.130769373	-1.862731867	0.813797671	0.508057465	-0.119484771	0.500322766	-1.993601218	-0.619896262	-0.794970891	0.343824517	0.119484771	-0.555132042	-1.130769373	1.092857156	1.460977052	0.678771572	-1.021399468	0.188425032	0.315058297	-0.713488578	-0.636490883	-1.318010897	-1.068431117	2.345104662	-0.202310601	-1.080563549	-0.563095926	-0.579132162
GRMZM2G373928	-1.568142731	1.170380633	0.078412413	-0.813797671	-0.603470624	-1.591873889	-0.286550499	-1.697120332	2.171527717	-0.965610478	0.380190046	0.923055543	1.642224543	-1.616536998	-0.611662814	-0.265322712	-0.758136008	-0.409646587	0.776421761	0.017029548	-0.547203211	-1.351202935	1.092857156	-0.872103029	-0.439462999	-0.852346618	-0.91267586	0.500322766	0.91267586	1.056453949	0.051108415	-0.237202109	0.140092436	-1.862731867	-0.794970891	-1.240815502	-0.571095686	1.501786817	0.954809756	0.202310601	-1.301946185	1.523165155	1.902810954	0.696025208	-0.202310601	2.104600628	-0.315058297	-1.368372038	-0.251237576
GRMZM2G169699	0.380190046	0.43197323	-0.83291742	-0.872103029	2.171527717	1.441453795	0.547203211	-0.965610478	-1.092857156	0.017029548	-0.446977502	0.140092436	0.133217035	0.722302208	-0.823319923	0.216235289	0.704730028	-0.315058297	0.882109877	0.731172307	-0.776421761	2.645701413	0.112627241	-0.35105981	1.143773961	1.301946185	-0.202310601	-1.946202375	-0.279460686	-0.112627241	0.119484771	0.153863466	0.09208509	-1.669043821	1.642224543	0.83291742	-0.230202032	0.595318735	1.170380633	0.329407333	-0.424507616	-0.044289159	-2.171527717	-0.209267873	-0.030656506	1.403975696	-0.603470624	-1.862731867	0.023842473
GRMZM2G064193	-0.272384894	1.211918765	0.322224522	-1.301946185	0.064754379	-0.813797671	1.255660378	-0.085246759	2.171527717	-0.619896262	0.35105981	0.051108415	1.226239142	-1.669043821	-1.286210621	-0.223213218	-0.611662814	-0.446977502	1.009990169	-0.119484771	-1.143773961	0.098927729	0.555132042	-0.547203211	0.126347925	-1.226239142	-0.387522319	-0.595318735	0.146974467	-0.037471962	-1.825439172	-0.167663737	0.402250065	-1.946202375	0.628171949	-1.068431117	-0.380190046	1.523165155	1.616536998	0.45451733	-1.862731867	1.825439172	1.790524917	-0.713488578	1.021399468	1.902810954	-2.998020796	-0.469675385	0.343824517
GRMZM2G014902	1.862731867	1.197842699	0.933535639	0.105775004	0.462083086	0.636490883	0.579132162	-0.611662814	-2.171527717	0.174575701	1.211918765	0.722302208	0.678771572	0.43197323	0.237202109	0.923055543	0.119484771	0.547203211	-0.563095926	0.372878156	0.037471962	-0.037471962	-0.661717677	0.758136008	1.790524917	-1.068431117	-0.003405752	-1.902810954	-0.174575701	-0.469675385	-0.7490877	-0.023842473	0.402250065	-0.785662535	2.249880663	0.167663737	-0.300773842	1.068431117	1.616536998	1.021399468	1.255660378	1.170380633	-1.170380633	-1.105318189	0.300773842	1.286210621	1.460977052	-0.965610478	-1.092857156
GRMZM2G418232	0.987557182	0.329407333	0.670220259	1.044626445	0.842592259	0.023842473	-0.595318735	-0.547203211	-2.345104662	-0.258273739	0.365586148	-0.555132042	0.500322766	-0.892205847	-1.143773961	-0.636490883	0.265322712	0.358313528	-1.697120332	1.441453795	0.555132042	1.33442315	-2.045954276	-0.336607179	0.105775004	0.892205847	0.044289159	-1.044626445	-0.531447525	0.813797671	1.591873889	1.697120332	-0.862182757	-1.385954264	1.368372038	0.251237576	0.167663737	0.394875486	-0.785662535	-0.343824517	-0.293654744	-1.009990169	-0.902393588	-0.044289159	0.223213218	0.146974467	-1.318010897	-0.767246816	-1.056453949
GRMZM2G134687	-2.998020796	1.862731867	1.757666049	-2.645701413	1.170380633	1.184000049	0.017029548	1.080563549	-2.345104662	0.83291742	1.130769373	0.146974467	-2.249880663	0.670220259	-2.045954276	-1.993601218	-0.023842473	0.279460686	1.032943298	0.987557182	1.368372038	-1.862731867	-1.825439172	0.902393588	0.731172307	-1.790524917	0.153863466	2.171527717	0.237202109	-1.697120332	-1.669043821	0.74010031	1.286210621	0.112627241	-1.616536998	2.045954276	-1.591873889	0.329407333	-1.545263217	0.244213829	-1.523165155	1.117953259	0.687372812	-1.501786817	-1.48107362	1.021399468	0.469675385	-1.460977052	0.704730028
GRMZM5G835418	0.804348643	-0.017029548	-0.09208509	-0.446977502	0.188425032	0.653262666	-1.197842699	-0.394875486	-2.998020796	0.237202109	0.071581727	0.587206217	-0.244213829	-0.402250065	-0.670220259	-0.322224522	0.539308633	1.184000049	2.345104662	-0.51582268	0.010217413	0.500322766	-0.085246759	-0.030656506	-0.484942137	-0.852346618	0.477294855	0.307908216	-0.862182757	-1.080563549	0.286550499	0.758136008	0.439462999	-0.758136008	-0.209267873	-0.251237576	1.422465003	-0.653262666	-1.33442315	-0.563095926	-0.237202109	-0.358313528	1.669043821	1.240815502	-0.216235289	0.74010031	-1.056453949	-2.468001988	-0.279460686
GRMZM2G343856	-0.230202032	-2.998020796	0.030656506	-0.237202109	-2.645701413	0.153863466	0.687372812	-0.300773842	-2.249880663	-2.171527717	-2.104600628	-0.037471962	-2.045954276	-0.603470624	-0.767246816	-0.611662814	0.051108415	0.272384894	-1.902810954	0.462083086	0.987557182	-0.244213829	-0.223213218	-0.365586148	-1.825439172	-0.872103029	1.318010897	-0.45451733	0.439462999	0.823319923	1.240815502	0.587206217	0.678771572	-1.726602201	-0.064754379	0.372878156	-0.776421761	-0.409646587	0.45451733	1.697120332	0.571095686	-0.160759774	-0.343824517	-1.697120332	0.653262666	0.477294855	-1.669043821	0.322224522	-0.181496015
GRMZM5G874903	0.923055543	1.226239142	0.670220259	1.318010897	-1.156974916	-0.862182757	0.484942137	0.307908216	-1.946202375	2.045954276	-0.704730028	2.468001988	1.068431117	-1.33442315	0.424507616	-0.417065588	-0.670220259	0.83291742	-2.468001988	0.477294855	1.301946185	-1.068431117	0.329407333	-0.064754379	-1.368372038	-0.767246816	0.209267873	-0.237202109	0.010217413	0.731172307	0.358313528	0.954809756	1.545263217	0.74010031	0.882109877	0.767246816	-0.653262666	-0.628171949	0.523619123	1.422465003	0.842592259	0.492617885	-1.726602201	-1.441453795	-0.794970891	-0.265322712	-1.226239142	1.946202375	-1.056453949
GRMZM2G580536	0.704730028	-2.998020796	0.251237576	0.023842473	0.722302208	0.603470624	1.170380633	0.037471962	-2.468001988	0.030656506	1.757666049	1.009990169	-0.424507616	1.368372038	0.713488578	-0.51582268	2.249880663	1.226239142	-2.345104662	-2.249880663	-2.171527717	0.105775004	-0.587206217	-0.492617885	-2.104600628	-0.619896262	1.422465003	-1.993601218	0.098927729	-1.946202375	1.825439172	0.286550499	-0.555132042	-0.09208509	-0.160759774	-1.902810954	1.669043821	-0.188425032	0.372878156	0.146974467	1.616536998	0.279460686	-1.862731867	-1.825439172	-1.790524917	1.351202935	-0.439462999	-0.469675385	-0.462083086
GRMZM2G437445	0.188425032	0.965610478	1.726602201	0.74010031	-1.156974916	0.785662535	1.545263217	0.91267586	-1.726602201	-0.492617885	-0.085246759	1.240815502	-0.358313528	-0.469675385	-0.387522319	-0.343824517	2.645701413	0.336607179	1.130769373	0.446977502	0.017029548	-0.987557182	0.523619123	0.902393588	-0.892205847	0.563095926	-0.439462999	-0.508057465	-0.300773842	0.579132162	0.862182757	-0.133217035	-0.372878156	-0.842592259	0.484942137	0.500322766	-1.902810954	0.202310601	0.003405752	0.670220259	-0.477294855	0.794970891	-0.140092436	-0.112627241	-0.272384894	1.403975696	0.547203211	-1.403975696	0.678771572
GRMZM2G105469	-0.112627241	2.249880663	1.757666049	0.731172307	1.523165155	-2.998020796	-0.064754379	-0.293654744	2.645701413	-0.258273739	-2.468001988	1.825439172	-0.387522319	-2.249880663	-0.579132162	0.595318735	0.670220259	1.021399468	-0.358313528	0.902393588	0.804348643	0.09208509	-0.105775004	0.167663737	1.117953259	0.188425032	-0.09208509	1.642224543	1.368372038	2.171527717	0.965610478	-2.104600628	0.484942137	-1.993601218	0.539308633	0.862182757	0.030656506	-0.140092436	-1.946202375	1.197842699	0.713488578	-1.902810954	-1.862731867	1.568142731	-0.272384894	-1.825439172	-0.628171949	0.380190046	0.202310601
[truncated: 248 more columns]
