# Supplementary material for: Verification of Three-Phase Dependency Analysis Bayesian Network Learning Method for Maize Carotenoid Gene Mining
Source: Biomed Res Int. 2017 Jul 30;2017:1813494. doi: 10.1155/2017/1813494 (PMC5554554; doi:10.1155/2017/1813494)
Supplement: Supplementary file 1 — The experiment data 1 of 109 nodes, the experiment data 2 of 109 nodes, and so on are shown here. [file 1813494.f1.zip › Supplementary material/Gene100_2.csv]

V1	V2	V3	V4	V5	V6	V7	V8	V9	V10	V11	V12	V13	V14	V15	V16	V17	V18	V19	V20	V21	V22	V23	V24	V25	V26	V27	V28	V29	V30	V31	V32	V33	V34	V35	V36	V37	V38	V39	V40	V41	V42	V43	V44	V45	V46	V47	V48	V49	V50
GRMZM2G701180	1.946202375	-0.329407333	-0.758136008	0.636490883	-1.009990169	-0.687372812	-0.785662535	-0.146974467	-1.523165155	-0.587206217	-0.696025208	-0.078412413	-1.385954264	-0.119484771	1.240815502	-0.372878156	-0.547203211	-0.823319923	-1.642224543	-0.051108415	-1.211918765	0.571095686	-0.954809756	1.105318189	0.661717677	1.368372038	-2.249880663	-0.133217035	0.83291742	1.545263217	1.170380633	-2.645701413	-0.209267873	1.009990169	-0.188425032	-0.098927729	2.468001988	-2.171527717	-1.403975696	0.462083086	0.35105981	-0.300773842	0.380190046	0.804348643	0.813797671	0.439462999	-1.591873889	-0.237202109	-1.143773961
GRMZM2G170276	0.776421761	0.064754379	0.105775004	0.653262666	0.687372812	-1.130769373	-0.037471962	-1.33442315	-1.523165155	0.469675385	0.202310601	-0.484942137	-0.003405752	0.057930049	-0.424507616	-0.933535639	-0.51582268	-0.892205847	1.226239142	0.45451733	-0.085246759	-0.902393588	-0.372878156	0.547203211	0.902393588	2.045954276	0.160759774	1.080563549	-0.167663737	1.669043821	0.933535639	1.105318189	0.987557182	-0.595318735	-0.965610478	-0.078412413	-0.563095926	0.044289159	-1.48107362	0.293654744	-0.195363108	-0.823319923	1.902810954	1.156974916	-0.112627241	0.74010031	-0.531447525	-1.862731867	1.021399468
GRMZM2G022318	1.790524917	0.078412413	-0.343824517	-0.293654744	-0.105775004	1.757666049	0.731172307	0.126347925	0.987557182	0.251237576	-0.484942137	1.441453795	0.954809756	-0.555132042	-0.628171949	0.140092436	2.468001988	0.484942137	0.823319923	-1.092857156	0.965610478	0.944119285	0.852346618	-0.160759774	-0.462083086	0.758136008	-0.216235289	-0.587206217	0.279460686	0.037471962	0.336607179	1.697120332	-0.322224522	0.842592259	-0.43197323	-0.6448541	1.032943298	0.051108415	-2.104600628	-0.244213829	-2.249880663	0.258273739	0.044289159	-1.368372038	-0.804348643	-1.143773961	-2.645701413	-0.74010031	-1.255660378
GRMZM2G042231	0.315058297	-0.892205847	-1.270787244	0.439462999	0.83291742	0.057930049	-0.678771572	-0.462083086	-2.998020796	1.092857156	-0.030656506	1.351202935	-0.329407333	-0.611662814	-1.351202935	-0.202310601	1.669043821	1.255660378	-0.181496015	0.402250065	1.301946185	0.987557182	-2.345104662	-0.35105981	-0.188425032	-0.365586148	-0.424507616	-0.944119285	-0.767246816	0.329407333	-0.439462999	0.804348643	0.078412413	1.021399468	0.286550499	0.358313528	1.117953259	-1.501786817	0.064754379	0.365586148	-0.998710851	-1.184000049	1.591873889	1.697120332	0.539308633	-0.954809756	-1.669043821	0.322224522	-1.286210621
GRMZM2G043435	0.133217035	-0.6448541	0.678771572	-0.237202109	0.216235289	0.944119285	0.722302208	-0.722302208	-2.645701413	0.619896262	-0.209267873	-0.230202032	1.255660378	0.417065588	-1.021399468	-0.628171949	-0.010217413	0.477294855	-1.368372038	0.531447525	-0.133217035	0.508057465	-2.104600628	0.380190046	1.021399468	-0.071581727	-0.469675385	-1.48107362	-0.882109877	-1.032943298	0.322224522	0.446977502	-0.293654744	-0.35105981	1.301946185	1.211918765	-0.767246816	-0.944119285	2.249880663	0.579132162	0.237202109	0.484942137	-1.403975696	-1.170380633	1.862731867	-0.030656506	-0.603470624	0.003405752	-1.385954264
GRMZM2G056916	1.616536998	-0.167663737	-0.195363108	0.195363108	0.286550499	1.270787244	0.051108415	-1.226239142	-2.998020796	0.462083086	-0.704730028	-0.7490877	-1.021399468	0.7490877	-0.785662535	-1.368372038	1.642224543	0.402250065	1.105318189	-0.078412413	-0.636490883	0.315058297	-0.653262666	-0.329407333	-0.140092436	-0.244213829	0.372878156	-0.523619123	1.170380633	0.244213829	1.902810954	1.044626445	1.068431117	0.852346618	0.409646587	0.6448541	-1.092857156	0.119484771	-1.902810954	0.329407333	-0.731172307	-0.91267586	-1.068431117	-1.697120332	-0.071581727	-0.492617885	-0.722302208	-0.687372812	0.892205847
GRMZM2G157263	1.862731867	-0.105775004	1.301946185	-0.43197323	0.7490877	0.477294855	-0.492617885	-0.380190046	0.140092436	-0.758136008	0.611662814	0.794970891	1.757666049	-0.523619123	-1.156974916	0.587206217	0.83291742	-0.539308633	1.240815502	0.804348643	0.181496015	0.933535639	0.044289159	1.790524917	-1.403975696	0.307908216	-0.571095686	0.6448541	0.902393588	0.892205847	0.842592259	-0.251237576	0.09208509	-0.704730028	0.126347925	0.202310601	-1.616536998	-0.112627241	-0.010217413	0.064754379	-1.170380633	-1.351202935	-1.993601218	-2.249880663	-1.825439172	0.030656506	-1.368372038	-1.862731867	-0.670220259
GRMZM5G804181	-0.387522319	0.484942137	-0.372878156	0.670220259	0.078412413	0.892205847	0.539308633	-0.933535639	-0.852346618	1.080563549	-0.286550499	-2.998020796	1.790524917	0.555132042	-0.315058297	-0.547203211	0.976525035	0.500322766	0.322224522	1.351202935	2.045954276	0.195363108	0.003405752	0.35105981	-1.368372038	-0.174575701	0.531447525	0.653262666	1.270787244	-0.307908216	-0.202310601	-0.804348643	0.064754379	-0.83291742	-2.468001988	0.7490877	-1.48107362	0.071581727	1.211918765	-0.279460686	0.6448541	1.009990169	0.223213218	-0.237202109	-0.140092436	0.265322712	-0.785662535	-0.098927729	0.462083086
GRMZM2G003379	-0.862182757	-0.286550499	-0.813797671	0.653262666	-0.758136008	-0.146974467	1.669043821	0.030656506	-1.240815502	-0.322224522	-0.531447525	0.74010031	-0.098927729	0.713488578	-1.368372038	0.051108415	-0.976525035	0.45451733	0.462083086	0.579132162	0.731172307	-0.343824517	-1.351202935	-0.842592259	1.156974916	-1.211918765	-0.380190046	2.645701413	0.933535639	1.790524917	2.249880663	-0.167663737	1.33442315	-0.272384894	0.044289159	-0.462083086	0.563095926	1.368372038	1.385954264	0.587206217	0.531447525	1.545263217	-2.171527717	-1.862731867	-1.523165155	0.852346618	1.021399468	-1.33442315	0.998710851
GRMZM2G351330	-0.882109877	1.616536998	1.009990169	-2.998020796	-0.230202032	-2.645701413	0.409646587	-2.468001988	-0.508057465	-2.345104662	-2.249880663	0.965610478	1.156974916	-2.104600628	-2.045954276	-0.842592259	-1.021399468	1.286210621	-1.993601218	0.628171949	-0.315058297	-1.946202375	1.032943298	-0.017029548	2.249880663	0.112627241	-1.902810954	2.645701413	0.51582268	0.439462999	-0.023842473	0.687372812	1.642224543	-1.862731867	-0.402250065	0.767246816	-0.112627241	2.045954276	1.726602201	0.133217035	-0.555132042	0.279460686	0.603470624	0.336607179	-0.500322766	-0.477294855	1.441453795	-0.823319923	1.368372038
GRMZM2G095698	0.372878156	-0.202310601	-0.636490883	-0.944119285	1.351202935	1.044626445	0.477294855	-1.422465003	2.998020796	-1.211918765	-1.726602201	0.044289159	0.571095686	-1.545263217	-0.74010031	-1.697120332	0.003405752	0.307908216	-0.057930049	0.258273739	0.965610478	-0.098927729	-0.258273739	-0.954809756	1.068431117	0.188425032	-0.244213829	0.469675385	-0.329407333	-0.539308633	-0.882109877	-0.976525035	1.825439172	-1.616536998	-0.307908216	0.133217035	0.105775004	-0.713488578	0.09208509	-0.216235289	-0.862182757	-0.823319923	0.823319923	0.358313528	1.009990169	-0.394875486	0.251237576	-0.195363108	0.174575701
GRMZM5G843237	0.307908216	-0.037471962	0.439462999	0.078412413	-0.010217413	0.160759774	-2.998020796	-2.645701413	-2.249880663	-2.171527717	-0.133217035	-2.104600628	-0.140092436	-0.174575701	0.976525035	-1.993601218	0.587206217	0.329407333	-1.946202375	-1.902810954	2.171527717	1.240815502	0.315058297	-1.790524917	0.500322766	1.902810954	-0.098927729	-1.726602201	-1.697120332	0.044289159	-1.669043821	-0.064754379	0.209267873	-1.591873889	1.385954264	0.776421761	0.555132042	1.368372038	0.202310601	0.112627241	-1.545263217	0.030656506	-1.523165155	0.279460686	0.469675385	-1.501786817	-1.48107362	0.010217413	0.696025208
GRMZM2G080139	0.923055543	-0.902393588	0.279460686	0.146974467	0.91267586	1.501786817	0.531447525	-0.188425032	-2.998020796	1.669043821	-0.446977502	1.441453795	-0.571095686	-0.265322712	-0.628171949	-0.146974467	1.642224543	1.184000049	-1.105318189	0.044289159	0.394875486	0.216235289	-1.862731867	0.230202032	-0.547203211	0.181496015	0.51582268	-1.441453795	-0.251237576	-0.417065588	1.068431117	1.757666049	-0.105775004	-1.669043821	0.315058297	1.616536998	0.872103029	-1.092857156	-0.794970891	1.021399468	-0.933535639	-0.439462999	-1.591873889	-1.726602201	0.587206217	-0.307908216	-0.74010031	-0.595318735	-0.336607179
GRMZM2G024482	0.852346618	0.300773842	-0.842592259	-0.293654744	0.462083086	0.998710851	0.358313528	-0.872103029	0.862182757	0.387522319	0.293654744	-0.272384894	0.523619123	1.545263217	-1.032943298	-1.545263217	1.757666049	0.251237576	0.023842473	-0.523619123	-2.645701413	-0.776421761	0.731172307	-0.372878156	-0.146974467	-0.704730028	0.279460686	0.944119285	0.776421761	-0.202310601	1.591873889	1.117953259	1.068431117	0.181496015	0.051108415	0.343824517	-0.731172307	0.322224522	-1.255660378	1.318010897	0.098927729	-0.209267873	0.153863466	-0.678771572	-0.126347925	0.477294855	1.240815502	0.547203211	-0.380190046
GRMZM2G095043	1.170380633	-0.794970891	-0.023842473	-0.064754379	0.670220259	0.112627241	0.477294855	0.023842473	-2.468001988	0.126347925	-0.74010031	0.508057465	-0.571095686	0.160759774	-0.286550499	0.678771572	0.83291742	0.954809756	-1.568142731	0.439462999	-1.697120332	0.852346618	-2.104600628	-0.230202032	0.251237576	-0.258273739	0.343824517	-1.616536998	-0.842592259	1.642224543	2.345104662	1.48107362	0.91267586	-0.954809756	-0.767246816	1.117953259	1.902810954	-0.017029548	-0.813797671	-0.579132162	-1.044626445	-0.776421761	-0.003405752	-0.83291742	-0.085246759	0.322224522	-0.223213218	-0.202310601	0.611662814
GRMZM2G001033	-0.223213218	0.508057465	0.188425032	-1.009990169	0.35105981	0.153863466	0.704730028	-0.293654744	-2.998020796	-0.804348643	-1.946202375	0.071581727	2.998020796	-0.329407333	-1.697120332	-1.501786817	0.7490877	0.722302208	-0.244213829	0.892205847	0.003405752	0.265322712	-1.642224543	-0.954809756	1.669043821	-1.255660378	-0.394875486	-0.078412413	0.587206217	1.33442315	1.48107362	-0.09208509	0.167663737	-1.403975696	0.380190046	0.804348643	0.409646587	-0.195363108	1.790524917	0.842592259	-1.184000049	0.307908216	0.336607179	0.286550499	1.092857156	0.358313528	-0.933535639	-0.336607179	-0.611662814
GRMZM2G127661	-2.998020796	0.523619123	-2.645701413	0.462083086	-2.468001988	-2.345104662	-2.249880663	-0.023842473	-2.104600628	-2.045954276	0.105775004	1.080563549	-1.993601218	-1.902810954	1.143773961	1.032943298	0.286550499	-1.862731867	-1.825439172	-1.790524917	-1.726602201	-1.697120332	-1.669043821	-1.642224543	0.670220259	0.51582268	0.944119285	-1.568142731	-1.545263217	1.009990169	1.351202935	-1.501786817	0.531447525	1.862731867	0.402250065	-1.460977052	1.368372038	-1.441453795	-1.422465003	-1.403975696	1.616536998	-1.385954264	-1.368372038	-1.351202935	-1.33442315	0.492617885	-1.318010897	1.757666049	0.071581727
GRMZM2G147849	1.068431117	0.767246816	0.976525035	1.301946185	0.343824517	0.119484771	0.293654744	1.862731867	0.230202032	1.170380633	-0.987557182	0.539308633	-0.181496015	-0.105775004	-0.579132162	-0.09208509	0.140092436	0.987557182	1.669043821	-1.056453949	1.092857156	0.446977502	0.531447525	0.030656506	1.790524917	0.112627241	-1.403975696	0.595318735	0.09208509	-0.462083086	-0.160759774	-1.117953259	-0.539308633	-2.468001988	0.237202109	0.037471962	-1.825439172	0.35105981	-0.265322712	0.571095686	-1.286210621	-1.105318189	-1.48107362	-1.441453795	1.105318189	0.500322766	-0.998710851	0.315058297	0.424507616
GRMZM2G139828	-0.670220259	0.133217035	0.758136008	0.6448541	0.112627241	0.555132042	0.923055543	-0.446977502	0.492617885	-0.547203211	-0.394875486	-0.329407333	-1.385954264	1.056453949	-0.492617885	0.462083086	1.993601218	0.322224522	0.037471962	0.265322712	-0.628171949	-0.174575701	-0.085246759	-0.882109877	-0.45451733	-0.687372812	0.653262666	0.286550499	0.933535639	2.249880663	2.468001988	0.965610478	1.068431117	-1.170380633	0.223213218	0.823319923	0.230202032	0.670220259	0.085246759	-0.409646587	-1.697120332	-1.757666049	-1.669043821	-0.531447525	-0.767246816	1.143773961	-1.48107362	-0.071581727	-0.813797671
GRMZM2G045404	0.237202109	1.197842699	0.265322712	0.300773842	1.460977052	0.611662814	1.270787244	-1.946202375	-0.713488578	1.130769373	0.587206217	1.211918765	0.365586148	-0.293654744	-0.307908216	-0.823319923	0.531447525	-0.209267873	1.545263217	-1.403975696	-0.976525035	-1.318010897	0.223213218	-0.244213829	-0.216235289	0.492617885	-0.237202109	0.017029548	-0.731172307	-1.117953259	-0.687372812	-0.862182757	0.057930049	0.446977502	-0.153863466	0.862182757	0.91267586	-0.336607179	0.105775004	-0.417065588	-0.387522319	0.181496015	-0.555132042	-2.345104662	0.902393588	0.023842473	0.636490883	-0.126347925	0.387522319
GRMZM2G436448	0.160759774	1.545263217	0.43197323	0.223213218	0.587206217	0.402250065	0.628171949	-2.998020796	-2.345104662	-0.057930049	-0.293654744	1.902810954	-2.249880663	-2.171527717	-0.244213829	-2.104600628	0.462083086	1.170380633	-2.045954276	0.954809756	1.197842699	-0.017029548	-0.133217035	0.758136008	0.523619123	-0.030656506	0.202310601	1.422465003	0.409646587	2.645701413	1.33442315	0.83291742	1.825439172	-0.322224522	0.508057465	-1.862731867	-1.825439172	-0.064754379	1.301946185	1.255660378	-1.790524917	1.044626445	-1.757666049	-1.726602201	-1.697120332	1.697120332	0.678771572	0.731172307	1.460977052
GRMZM2G053500	0.402250065	1.056453949	0.017029548	-0.071581727	-0.539308633	1.757666049	1.211918765	0.343824517	-2.645701413	1.33442315	-0.933535639	0.670220259	2.249880663	0.133217035	-1.270787244	-1.080563549	1.032943298	1.790524917	-1.993601218	1.255660378	0.279460686	0.202310601	-1.757666049	-0.003405752	0.794970891	-0.153863466	0.595318735	-1.255660378	0.43197323	0.188425032	-0.251237576	0.628171949	-0.202310601	-1.697120332	0.603470624	1.642224543	0.237202109	-0.140092436	0.83291742	1.318010897	-0.998710851	0.944119285	-0.670220259	-0.51582268	0.653262666	0.619896262	-0.976525035	0.078412413	-0.43197323
GRMZM2G107721	0.508057465	0.237202109	-0.51582268	0.336607179	-0.167663737	-0.307908216	-0.43197323	-0.933535639	2.998020796	-0.523619123	-1.117953259	-1.403975696	0.057930049	-0.758136008	-0.037471962	-0.195363108	0.704730028	-1.056453949	0.758136008	-0.492617885	-1.184000049	-1.301946185	0.678771572	-0.358313528	-2.249880663	-0.343824517	0.628171949	0.409646587	1.255660378	0.439462999	-0.842592259	1.197842699	0.923055543	-1.422465003	-0.508057465	0.133217035	-0.265322712	0.071581727	-1.255660378	0.785662535	-0.767246816	-0.017029548	1.368372038	-1.568142731	-0.272384894	0.823319923	-1.902810954	-0.09208509	0.944119285
GRMZM2G120016	-0.293654744	0.804348643	-0.636490883	-0.387522319	-0.098927729	-0.017029548	0.402250065	-2.998020796	2.104600628	0.91267586	0.813797671	0.286550499	-0.439462999	0.587206217	-0.126347925	0.628171949	1.501786817	-2.345104662	-0.417065588	0.174575701	-2.171527717	2.045954276	-0.713488578	0.571095686	0.017029548	-0.140092436	0.010217413	1.226239142	-2.104600628	1.993601218	0.446977502	1.33442315	-0.704730028	0.244213829	-0.244213829	-0.722302208	0.387522319	1.240815502	0.965610478	0.188425032	-0.603470624	-0.044289159	-0.579132162	1.021399468	0.160759774	-0.424507616	-0.181496015	-1.993601218	1.211918765
AF546187.1_FG007	-0.230202032	0.181496015	0.265322712	-0.300773842	0.343824517	-0.45451733	-0.477294855	-0.603470624	-0.998710851	0.587206217	0.112627241	-0.380190046	0.286550499	0.279460686	-0.078412413	0.6448541	-0.209267873	0.167663737	-0.223213218	0.687372812	1.669043821	0.619896262	-1.021399468	-0.265322712	-1.726602201	0.500322766	0.003405752	-0.329407333	-0.933535639	-0.547203211	-0.202310601	-1.068431117	-1.523165155	1.902810954	0.611662814	0.071581727	-0.237202109	0.064754379	1.460977052	-0.417065588	1.726602201	0.998710851	-0.484942137	0.216235289	0.636490883	-1.056453949	-0.678771572	2.045954276	0.085246759
GRMZM2G456512	2.104600628	-1.197842699	-0.251237576	0.195363108	1.441453795	2.345104662	-0.579132162	-0.7490877	0.272384894	-0.462083086	0.003405752	0.329407333	-0.954809756	0.446977502	-0.758136008	0.044289159	1.825439172	0.023842473	0.322224522	0.057930049	-0.098927729	0.804348643	-0.944119285	0.402250065	-0.146974467	0.998710851	-0.417065588	-0.336607179	2.249880663	-1.092857156	-0.380190046	0.202310601	0.265322712	-1.385954264	1.156974916	0.813797671	-0.965610478	-0.785662535	-1.068431117	0.976525035	0.010217413	-0.862182757	-2.645701413	-0.83291742	0.380190046	-0.628171949	-1.862731867	0.258273739	-0.105775004
GRMZM2G079185	0.071581727	1.068431117	1.726602201	-0.492617885	1.790524917	-0.336607179	0.085246759	-0.6448541	2.998020796	-0.023842473	1.862731867	1.009990169	1.056453949	0.563095926	0.687372812	-2.645701413	1.301946185	0.098927729	0.902393588	-0.35105981	-2.468001988	0.265322712	-0.230202032	1.591873889	2.345104662	0.230202032	-0.167663737	1.318010897	0.223213218	-0.872103029	-2.345104662	-0.365586148	0.181496015	0.462083086	0.954809756	-2.171527717	-0.160759774	-1.211918765	-0.424507616	0.998710851	-1.301946185	-0.265322712	1.368372038	0.307908216	0.628171949	-0.776421761	-1.092857156	-0.902393588	0.492617885
GRMZM2G337792	1.501786817	0.105775004	1.616536998	0.804348643	1.092857156	1.790524917	1.523165155	-1.286210621	0.409646587	0.595318735	-0.446977502	0.603470624	0.933535639	2.171527717	1.105318189	-0.523619123	2.249880663	1.351202935	1.669043821	-0.439462999	-2.345104662	-0.230202032	-0.244213829	1.117953259	0.508057465	-0.976525035	-0.83291742	-0.6448541	-0.531447525	-0.329407333	0.037471962	0.35105981	2.345104662	-1.403975696	-0.051108415	0.484942137	1.130769373	-0.555132042	-0.35105981	0.767246816	-2.468001988	-0.45451733	0.202310601	-0.112627241	0.153863466	0.555132042	0.112627241	1.441453795	-0.713488578
GRMZM2G017603	-0.872103029	-0.09208509	0.307908216	-0.188425032	-0.153863466	-0.078412413	0.804348643	-0.057930049	-2.998020796	1.33442315	-1.270787244	1.270787244	1.726602201	-1.226239142	-0.813797671	-1.351202935	-0.35105981	0.758136008	0.51582268	-0.619896262	-1.523165155	-1.032943298	-1.993601218	-1.105318189	0.315058297	-1.669043821	-0.767246816	0.439462999	-0.424507616	0.998710851	1.501786817	-0.003405752	0.230202032	0.237202109	-1.697120332	1.143773961	-0.678771572	-0.030656506	0.767246816	0.417065588	-1.197842699	1.301946185	-1.862731867	-1.757666049	1.255660378	1.946202375	-0.547203211	0.030656506	-0.244213829
GRMZM2G163247	0.146974467	1.184000049	-0.343824517	-0.6448541	0.237202109	-0.43197323	-0.188425032	-1.403975696	-1.902810954	-0.286550499	0.188425032	1.080563549	-0.731172307	-0.531447525	-0.571095686	0.051108415	-0.619896262	-0.424507616	1.697120332	0.933535639	-0.477294855	-0.892205847	1.460977052	-1.105318189	0.571095686	-0.358313528	-1.270787244	-0.83291742	-0.462083086	1.642224543	1.726602201	1.385954264	-1.021399468	0.140092436	0.998710851	-0.322224522	0.417065588	0.785662535	-1.545263217	-0.842592259	0.547203211	0.336607179	0.74010031	0.251237576	0.595318735	-1.170380633	0.329407333	-1.825439172	-1.591873889
GRMZM2G048928	-1.301946185	0.051108415	-0.030656506	0.279460686	-0.51582268	-1.226239142	0.619896262	-1.270787244	-2.998020796	0.976525035	-0.862182757	1.726602201	0.758136008	-1.044626445	-1.080563549	-0.563095926	-0.45451733	0.098927729	1.211918765	0.91267586	0.223213218	-1.993601218	-0.767246816	-0.933535639	1.080563549	-0.477294855	-0.251237576	0.293654744	-0.195363108	0.653262666	0.35105981	0.372878156	0.365586148	-1.862731867	-0.230202032	-0.74010031	-0.293654744	-0.547203211	0.842592259	1.156974916	-0.785662535	-0.365586148	0.83291742	0.037471962	1.460977052	0.563095926	-0.704730028	-0.315058297	0.023842473
GRMZM2G125170	-0.636490883	0.174575701	1.301946185	0.587206217	-0.976525035	0.030656506	0.965610478	-0.767246816	-2.249880663	-0.272384894	-1.226239142	0.785662535	0.603470624	-0.713488578	-0.523619123	-0.722302208	0.336607179	0.439462999	-1.946202375	-0.678771572	0.45451733	0.244213829	-0.51582268	0.402250065	2.645701413	1.351202935	0.74010031	1.117953259	-0.300773842	0.394875486	-1.825439172	0.230202032	-1.790524917	0.293654744	0.09208509	-0.902393588	-0.394875486	1.523165155	0.813797671	0.508057465	-1.591873889	0.202310601	-0.74010031	-0.954809756	0.91267586	-0.409646587	-0.202310601	0.098927729	1.545263217
GRMZM2G334857	1.669043821	-0.372878156	-0.563095926	-0.133217035	0.258273739	1.591873889	-0.258273739	-0.882109877	-2.645701413	-0.315058297	-0.286550499	0.071581727	-0.628171949	0.237202109	-0.587206217	0.078412413	1.568142731	0.146974467	-1.501786817	0.539308633	-0.758136008	1.197842699	-2.171527717	0.670220259	1.184000049	-0.057930049	1.021399468	-1.790524917	-0.424507616	0.823319923	1.902810954	1.790524917	-0.112627241	-0.687372812	1.056453949	1.143773961	-0.044289159	0.051108415	-1.021399468	0.402250065	-0.477294855	0.279460686	-2.345104662	-0.902393588	0.954809756	-0.167663737	-1.092857156	0.209267873	-0.119484771
GRMZM2G069455	1.757666049	-1.286210621	-0.687372812	0.547203211	0.230202032	-0.300773842	0.279460686	-0.531447525	-2.645701413	0.365586148	2.171527717	1.568142731	0.105775004	-1.117953259	0.315058297	1.403975696	0.336607179	-0.35105981	-1.33442315	-0.492617885	-0.954809756	0.051108415	-2.171527717	-0.119484771	-0.358313528	0.409646587	-0.343824517	-0.508057465	-1.068431117	0.223213218	0.539308633	1.862731867	-0.010217413	0.209267873	-0.380190046	0.872103029	0.661717677	-0.105775004	0.603470624	0.35105981	-0.202310601	0.251237576	0.579132162	1.032943298	0.329407333	0.91267586	-2.104600628	-0.279460686	-0.794970891
GRMZM2G082484	0.731172307	-0.202310601	0.216235289	0.365586148	-1.044626445	-0.030656506	1.021399468	0.417065588	-2.045954276	-0.704730028	1.697120332	0.174575701	1.726602201	0.704730028	-0.265322712	-0.003405752	0.279460686	-0.595318735	0.579132162	-1.545263217	-1.48107362	0.112627241	-1.591873889	0.882109877	2.045954276	-1.368372038	-1.790524917	-0.492617885	-2.249880663	0.237202109	1.092857156	-0.394875486	-0.315058297	-0.6448541	1.441453795	1.068431117	0.51582268	0.43197323	0.722302208	-0.188425032	-2.171527717	0.713488578	0.892205847	0.813797671	1.862731867	1.669043821	0.571095686	-0.064754379	0.251237576
GRMZM2G149543	-0.336607179	1.591873889	0.293654744	-0.531447525	0.119484771	0.492617885	0.954809756	-2.645701413	-2.998020796	0.300773842	-1.286210621	0.603470624	0.965610478	0.923055543	-1.460977052	-0.409646587	-0.611662814	-1.385954264	1.33442315	-0.140092436	0.329407333	0.409646587	-0.595318735	-0.300773842	1.226239142	-1.726602201	-0.965610478	0.678771572	0.09208509	0.223213218	1.240815502	-0.244213829	1.117953259	1.255660378	0.140092436	-0.230202032	-0.862182757	1.946202375	1.080563549	0.358313528	-0.51582268	0.380190046	0.902393588	0.852346618	0.064754379	-0.209267873	2.104600628	0.188425032	0.133217035
GRMZM2G071010	-0.071581727	0.329407333	-0.365586148	0.794970891	-0.722302208	-1.032943298	0.439462999	-0.181496015	-2.171527717	-0.402250065	-0.300773842	0.307908216	-0.167663737	0.35105981	0.071581727	0.417065588	-1.105318189	-0.976525035	2.249880663	0.571095686	-2.045954276	-1.156974916	1.170380633	-0.704730028	0.044289159	-1.385954264	-1.170380633	1.130769373	-1.092857156	1.021399468	2.045954276	0.731172307	-0.030656506	-0.09208509	-0.678771572	-0.146974467	0.492617885	-0.394875486	-0.315058297	0.842592259	-0.279460686	-0.823319923	1.385954264	-1.501786817	-2.249880663	0.976525035	0.167663737	-0.51582268	0.195363108
GRMZM2G441906	-0.892205847	1.351202935	0.051108415	-0.126347925	-0.372878156	-1.790524917	0.571095686	-0.933535639	2.045954276	0.010217413	-0.336607179	-1.946202375	0.105775004	-1.197842699	1.117953259	0.017029548	0.023842473	0.167663737	-1.385954264	0.003405752	-1.156974916	-1.240815502	1.33442315	0.315058297	0.279460686	-0.237202109	1.021399468	2.998020796	1.790524917	1.993601218	0.933535639	1.130769373	2.249880663	-0.804348643	-0.424507616	-0.230202032	-0.492617885	1.032943298	0.6448541	0.722302208	-1.368372038	-1.568142731	1.501786817	0.636490883	0.678771572	0.83291742	-0.603470624	-0.119484771	1.862731867
GRMZM2G341918	0.51582268	1.368372038	-1.021399468	-0.003405752	0.119484771	1.591873889	-0.188425032	-0.579132162	-1.211918765	1.197842699	0.112627241	2.104600628	2.249880663	0.670220259	-0.402250065	0.571095686	1.184000049	1.501786817	-0.500322766	0.003405752	1.240815502	-0.6448541	-1.270787244	1.946202375	0.987557182	-0.661717677	0.146974467	-1.422465003	0.133217035	-0.872103029	0.531447525	-0.174575701	-0.307908216	-0.862182757	0.424507616	0.653262666	-0.272384894	-1.545263217	1.351202935	2.171527717	0.813797671	-0.071581727	-2.998020796	-2.645701413	-0.372878156	1.460977052	-0.279460686	0.160759774	-0.696025208
GRMZM2G139462	-0.195363108	0.571095686	0.477294855	0.45451733	0.767246816	0.902393588	-0.051108415	0.037471962	-1.993601218	2.045954276	-0.611662814	1.460977052	0.424507616	1.993601218	0.758136008	0.804348643	0.500322766	-0.071581727	1.143773961	-0.661717677	1.068431117	0.785662535	-0.998710851	-0.417065588	1.226239142	-0.394875486	0.174575701	0.167663737	0.603470624	-0.424507616	0.358313528	0.469675385	1.790524917	0.272384894	0.492617885	-1.021399468	0.023842473	1.368372038	-1.441453795	0.731172307	-2.645701413	-1.642224543	0.872103029	-1.170380633	1.568142731	-0.713488578	-0.842592259	0.071581727	0.119484771
GRMZM2G481604	-0.653262666	-0.531447525	-0.571095686	-0.595318735	-0.794970891	1.240815502	-0.322224522	1.523165155	0.023842473	-1.591873889	-2.998020796	-2.645701413	-0.678771572	0.140092436	-0.611662814	-1.441453795	-0.882109877	-1.009990169	0.477294855	-0.83291742	-1.270787244	-0.523619123	0.531447525	-1.056453949	-0.315058297	0.923055543	-0.954809756	-0.09208509	-0.462083086	-0.696025208	-1.068431117	0.251237576	0.469675385	-1.33442315	-0.258273739	-0.098927729	-0.044289159	0.380190046	-0.687372812	-0.265322712	1.351202935	-1.385954264	-2.468001988	-1.301946185	0.286550499	1.009990169	-1.669043821	-0.74010031	0.057930049
GRMZM2G070716	0.372878156	-0.987557182	0.892205847	0.587206217	0.293654744	-1.523165155	-0.492617885	0.758136008	0.085246759	2.345104662	1.523165155	-0.358313528	-0.293654744	-1.568142731	-0.687372812	0.017029548	-1.156974916	-0.923055543	0.010217413	0.057930049	-1.33442315	-1.240815502	2.249880663	-0.74010031	1.056453949	0.078412413	0.508057465	2.045954276	1.255660378	1.501786817	0.933535639	0.687372812	1.33442315	0.492617885	1.156974916	-0.45451733	0.251237576	0.678771572	-1.642224543	0.037471962	-0.315058297	-1.270787244	1.240815502	0.823319923	0.098927729	-0.010217413	-0.823319923	-0.202310601	0.051108415
GRMZM2G041724	1.080563549	-0.365586148	0.057930049	1.825439172	0.258273739	-0.571095686	-0.167663737	-0.188425032	-0.902393588	-2.998020796	-0.933535639	0.571095686	1.441453795	-0.044289159	-0.842592259	0.112627241	-0.579132162	-0.209267873	-0.500322766	0.372878156	-0.133217035	-1.255660378	1.568142731	0.223213218	-1.130769373	-1.092857156	0.394875486	1.301946185	-0.037471962	1.170380633	-2.468001988	0.767246816	0.823319923	-0.696025208	0.329407333	-0.35105981	-0.279460686	-0.216235289	0.696025208	0.579132162	-1.170380633	0.35105981	0.43197323	-0.539308633	0.776421761	0.563095926	0.085246759	-0.251237576	-2.171527717
GRMZM2G009785	0.902393588	0.160759774	-0.188425032	-0.343824517	0.462083086	0.628171949	-0.307908216	-0.315058297	-2.645701413	0.7490877	-0.852346618	0.300773842	-1.642224543	1.286210621	0.181496015	-0.7490877	0.813797671	0.409646587	0.140092436	0.579132162	-1.240815502	-0.35105981	-0.767246816	-0.976525035	0.023842473	0.133217035	0.882109877	-0.372878156	1.726602201	-0.587206217	0.872103029	-0.484942137	1.33442315	1.156974916	0.595318735	0.619896262	-0.722302208	0.365586148	-1.946202375	0.230202032	-1.301946185	-1.105318189	-0.539308633	-0.477294855	-0.661717677	-0.078412413	1.021399468	0.037471962	-0.126347925
GRMZM2G137211	1.255660378	-0.030656506	0.804348643	-0.523619123	0.484942137	0.785662535	0.862182757	-0.153863466	-2.468001988	-0.7490877	-1.130769373	-0.237202109	1.105318189	-0.216235289	1.068431117	0.579132162	2.045954276	0.998710851	0.343824517	0.216235289	-0.902393588	2.249880663	-1.697120332	0.402250065	0.603470624	-0.579132162	-0.976525035	-1.48107362	1.184000049	-0.500322766	0.336607179	1.197842699	0.230202032	-1.211918765	0.409646587	1.501786817	0.140092436	-0.044289159	1.286210621	0.923055543	-0.767246816	-1.240815502	-2.104600628	-1.318010897	1.211918765	-0.307908216	-0.160759774	1.270787244	-1.368372038
GRMZM2G087192	0.167663737	0.758136008	0.74010031	0.998710851	0.6448541	0.661717677	0.587206217	2.045954276	-1.286210621	-1.403975696	-0.051108415	-1.211918765	1.726602201	1.092857156	1.523165155	-1.422465003	0.595318735	0.146974467	1.286210621	-1.523165155	0.237202109	-0.477294855	0.51582268	-0.300773842	-0.555132042	-0.181496015	-0.417065588	-1.184000049	0.153863466	0.563095926	-0.064754379	-0.402250065	-0.539308633	-0.244213829	-0.387522319	-0.119484771	0.862182757	-0.813797671	0.085246759	0.329407333	-0.670220259	1.255660378	-0.611662814	-1.068431117	0.628171949	0.098927729	-1.080563549	0.678771572	0.402250065
GRMZM5G818431	1.270787244	0.153863466	0.300773842	-0.944119285	-0.45451733	0.140092436	0.531447525	-0.7490877	2.645701413	-0.767246816	-0.010217413	2.468001988	1.184000049	-0.394875486	0.696025208	0.424507616	-0.030656506	0.286550499	1.33442315	0.987557182	-1.197842699	0.611662814	0.539308633	-0.279460686	-0.523619123	-0.954809756	-1.080563549	-0.965610478	-0.402250065	-0.776421761	-1.993601218	-1.422465003	-1.270787244	-1.255660378	0.336607179	-1.301946185	-0.636490883	-0.315058297	1.032943298	0.230202032	-1.351202935	0.372878156	1.156974916	-0.547203211	0.251237576	1.790524917	-2.249880663	-0.862182757	0.571095686
GRMZM2G134162	-0.872103029	-0.842592259	0.7490877	-1.862731867	-0.7490877	-1.501786817	0.358313528	0.51582268	0.678771572	-0.402250065	-0.628171949	2.249880663	2.104600628	-0.439462999	-1.385954264	1.092857156	0.119484771	-0.51582268	0.500322766	-0.394875486	-1.056453949	-2.045954276	0.307908216	1.862731867	1.318010897	-0.758136008	1.902810954	0.579132162	1.545263217	0.402250065	-0.595318735	-0.804348643	0.555132042	-1.170380633	-1.092857156	-0.998710851	-1.568142731	-1.130769373	0.661717677	0.343824517	-1.270787244	-0.265322712	0.017029548	-1.351202935	0.293654744	-0.010217413	-0.358313528	0.394875486	0.547203211
GRMZM2G088196	1.902810954	1.226239142	-0.731172307	0.998710851	1.270787244	-0.153863466	-1.33442315	-0.078412413	-2.998020796	1.460977052	0.230202032	1.130769373	1.48107362	-1.170380633	0.322224522	0.030656506	1.068431117	1.545263217	0.098927729	-0.09208509	-2.045954276	0.595318735	-1.385954264	0.842592259	0.293654744	-1.403975696	0.133217035	0.085246759	0.965610478	-0.244213829	0.402250065	0.372878156	0.6448541	-0.91267586	0.358313528	1.143773961	-0.174575701	-0.098927729	-0.160759774	2.171527717	0.619896262	0.251237576	-1.422465003	0.064754379	0.279460686	0.670220259	-1.545263217	-0.713488578	-0.017029548
GRMZM2G316789	0.380190046	0.251237576	0.195363108	-0.258273739	-1.068431117	-0.43197323	1.226239142	0.293654744	2.645701413	-1.286210621	-0.595318735	-0.358313528	1.33442315	0.91267586	0.119484771	0.230202032	1.056453949	0.098927729	-2.998020796	0.409646587	-2.645701413	-1.092857156	-0.365586148	0.523619123	-2.468001988	-0.484942137	0.030656506	0.45451733	0.83291742	0.051108415	-2.345104662	-0.202310601	-0.636490883	0.933535639	-0.307908216	-1.545263217	-0.446977502	-0.044289159	-0.882109877	0.678771572	-1.056453949	-1.143773961	-2.249880663	1.044626445	1.032943298	-0.794970891	-1.021399468	-1.156974916	0.462083086
GRMZM2G145879	0.133217035	-0.380190046	-0.202310601	-0.462083086	-0.531447525	0.500322766	-0.251237576	-0.954809756	-2.468001988	-0.603470624	0.098927729	-1.33442315	-0.071581727	-0.872103029	-1.226239142	0.603470624	0.265322712	-0.45451733	1.240815502	0.547203211	-0.731172307	-1.318010897	-1.240815502	0.230202032	0.146974467	-0.579132162	-1.184000049	-0.188425032	0.336607179	-0.523619123	-0.133217035	0.160759774	1.156974916	-1.568142731	-0.160759774	0.611662814	0.293654744	0.579132162	-0.417065588	1.403975696	-0.563095926	-0.74010031	-0.09208509	-1.993601218	0.244213829	1.946202375	-0.882109877	-0.670220259	-0.153863466
GRMZM2G443655	0.587206217	-0.358313528	-1.068431117	0.35105981	-1.523165155	0.767246816	0.862182757	0.492617885	-2.645701413	-0.611662814	1.422465003	-0.023842473	-0.563095926	1.318010897	-1.441453795	1.523165155	1.33442315	-0.998710851	2.998020796	-0.446977502	0.872103029	-1.642224543	0.315058297	0.446977502	0.785662535	0.469675385	-2.249880663	0.523619123	-0.636490883	-0.057930049	-0.010217413	-1.825439172	-0.174575701	-1.902810954	-0.944119285	-0.409646587	-0.571095686	1.568142731	0.167663737	1.032943298	-0.181496015	-0.678771572	-0.83291742	-0.531447525	-1.301946185	0.91267586	-0.508057465	1.021399468	-0.126347925
GRMZM2G056606	-2.645701413	-1.422465003	-0.078412413	-0.307908216	0.265322712	-1.642224543	-1.591873889	-0.417065588	-0.071581727	0.872103029	0.469675385	0.167663737	0.713488578	-1.226239142	-0.195363108	0.402250065	-0.611662814	-1.385954264	0.078412413	-0.044289159	-0.862182757	-0.713488578	1.460977052	-0.636490883	0.209267873	-0.223213218	1.255660378	-1.441453795	0.387522319	1.825439172	0.307908216	1.422465003	1.318010897	0.813797671	0.051108415	-0.251237576	0.603470624	-0.954809756	-0.146974467	0.174575701	-0.91267586	-0.279460686	2.171527717	2.249880663	1.170380633	-0.119484771	0.105775004	-1.902810954	0.365586148
GRMZM2G031958	-0.244213829	-0.064754379	0.882109877	-0.842592259	1.184000049	0.133217035	2.998020796	0.872103029	1.545263217	0.670220259	0.126347925	-2.998020796	0.119484771	2.249880663	-0.078412413	-0.462083086	1.403975696	-0.523619123	-2.345104662	0.202310601	0.804348643	-0.785662535	-0.372878156	-0.731172307	0.244213829	-0.794970891	-2.171527717	1.33442315	-2.104600628	-0.286550499	-2.045954276	0.380190046	0.230202032	-1.993601218	-0.484942137	0.7490877	0.45451733	0.678771572	-0.611662814	-0.571095686	-0.300773842	1.616536998	-1.946202375	-0.872103029	1.270787244	0.417065588	-1.902810954	1.460977052	0.587206217
GRMZM2G159210	-0.195363108	0.653262666	0.322224522	0.003405752	-0.181496015	0.085246759	1.441453795	0.83291742	2.645701413	0.307908216	-2.645701413	-2.468001988	-2.345104662	0.587206217	-2.171527717	-0.160759774	0.508057465	-2.104600628	0.842592259	-0.037471962	-0.010217413	-2.045954276	1.616536998	0.195363108	1.48107362	0.133217035	-1.993601218	0.758136008	0.603470624	0.223213218	-1.946202375	-1.862731867	1.993601218	-1.757666049	-1.726602201	-1.697120332	-1.669043821	-1.642224543	-1.616536998	0.619896262	-1.591873889	-1.568142731	-1.545263217	-0.044289159	1.669043821	-0.030656506	-1.523165155	-1.501786817	1.092857156
GRMZM2G314125	-0.35105981	0.477294855	1.697120332	-0.933535639	-0.794970891	0.484942137	0.030656506	-1.080563549	-1.441453795	-1.616536998	-1.351202935	-0.944119285	-0.119484771	0.696025208	-0.469675385	0.174575701	0.424507616	0.933535639	-0.713488578	0.882109877	-0.619896262	-1.33442315	-0.195363108	-1.056453949	-0.030656506	-0.057930049	1.591873889	0.417065588	0.265322712	0.998710851	-1.642224543	1.068431117	1.143773961	0.571095686	0.83291742	0.017029548	0.402250065	-1.184000049	-0.365586148	0.010217413	-0.767246816	0.713488578	-0.547203211	-0.322224522	1.092857156	0.051108415	-0.998710851	-1.170380633	0.409646587
GRMZM2G367650	-0.322224522	0.579132162	0.731172307	-2.249880663	0.462083086	0.140092436	1.946202375	0.010217413	1.523165155	-0.300773842	0.336607179	-1.286210621	1.669043821	0.842592259	1.385954264	-0.336607179	0.523619123	-0.595318735	-0.670220259	-0.477294855	-0.43197323	-0.030656506	0.424507616	-0.704730028	-1.825439172	1.255660378	-2.645701413	0.785662535	-0.188425032	0.188425032	-1.862731867	0.35105981	0.153863466	-1.068431117	-0.492617885	-1.523165155	0.83291742	0.7490877	1.568142731	-0.181496015	0.003405752	0.167663737	1.862731867	-0.057930049	-0.678771572	-0.998710851	-1.056453949	-2.104600628	-0.785662535
GRMZM5G816552	-0.181496015	0.188425032	1.156974916	-0.244213829	1.318010897	1.568142731	1.460977052	-0.251237576	-1.368372038	2.345104662	-0.595318735	-0.105775004	0.571095686	1.385954264	-1.105318189	0.272384894	1.790524917	1.032943298	1.368372038	1.523165155	-2.345104662	0.051108415	0.071581727	0.758136008	0.508057465	-1.642224543	0.813797671	-0.954809756	0.563095926	0.174575701	1.009990169	0.704730028	1.184000049	-1.591873889	1.143773961	2.171527717	-0.293654744	0.976525035	0.251237576	-0.998710851	-0.09208509	-0.563095926	-0.003405752	-0.126347925	-0.402250065	-0.91267586	-0.279460686	-1.270787244	0.153863466
GRMZM2G436659	-2.998020796	-2.645701413	0.794970891	0.776421761	1.669043821	0.051108415	1.946202375	-0.126347925	-2.345104662	0.424507616	0.365586148	0.579132162	1.270787244	0.469675385	0.611662814	-0.064754379	1.642224543	0.965610478	-2.104600628	0.74010031	-2.045954276	-1.993601218	-1.946202375	0.954809756	-1.902810954	1.351202935	-0.010217413	-1.825439172	1.422465003	0.195363108	-1.790524917	-1.757666049	0.140092436	-1.669043821	2.104600628	1.403975696	-1.642224543	-1.616536998	-1.591873889	1.318010897	0.030656506	0.872103029	-1.568142731	0.531447525	0.722302208	1.902810954	-1.545263217	-1.523165155	2.171527717
GRMZM2G377887	1.403975696	0.439462999	-0.619896262	1.993601218	0.722302208	0.492617885	0.293654744	-1.441453795	-2.998020796	-0.119484771	-1.270787244	0.902393588	-1.080563549	-1.255660378	0.133217035	-0.767246816	0.286550499	1.270787244	-0.611662814	0.611662814	-0.174575701	-0.785662535	-2.468001988	-0.365586148	0.272384894	-0.202310601	0.057930049	-0.923055543	-0.842592259	-0.687372812	-0.153863466	0.153863466	-0.343824517	0.882109877	0.603470624	1.156974916	-0.044289159	-1.286210621	-0.872103029	-0.555132042	-1.545263217	0.315058297	-1.117953259	0.365586148	0.785662535	0.6448541	-1.591873889	0.251237576	-0.563095926
GRMZM2G076771	0.258273739	0.563095926	0.051108415	0.402250065	-0.555132042	-2.998020796	-0.547203211	-0.619896262	-0.051108415	0.804348643	0.286550499	0.954809756	0.279460686	-2.345104662	0.181496015	-0.174575701	-2.249880663	0.603470624	-2.171527717	1.117953259	-2.104600628	-2.045954276	0.882109877	-1.993601218	0.595318735	-0.611662814	-0.387522319	-1.946202375	-0.160759774	-0.119484771	0.469675385	0.017029548	-0.315058297	0.119484771	-1.862731867	-1.825439172	-0.380190046	0.923055543	-0.230202032	1.48107362	-0.167663737	1.368372038	-1.790524917	0.322224522	0.343824517	1.33442315	0.272384894	1.143773961	1.009990169
GRMZM2G413275	1.545263217	0.265322712	-2.998020796	0.547203211	-2.645701413	-2.468001988	1.669043821	0.74010031	-2.249880663	0.174575701	0.417065588	0.794970891	-2.171527717	-2.045954276	-1.993601218	-1.946202375	1.33442315	0.731172307	-1.902810954	-1.862731867	-1.757666049	-1.726602201	1.021399468	-1.697120332	-1.669043821	-1.642224543	0.146974467	2.104600628	-1.591873889	-1.568142731	-1.545263217	0.500322766	0.023842473	0.105775004	-1.501786817	-1.48107362	2.171527717	0.010217413	0.595318735	-1.441453795	0.202310601	1.642224543	-1.422465003	0.7490877	1.460977052	-1.403975696	-1.385954264	-1.368372038	-1.351202935
GRMZM2G076826	1.211918765	-0.181496015	-0.767246816	-0.279460686	0.105775004	0.842592259	0.731172307	0.998710851	-0.892205847	-0.030656506	0.539308633	2.645701413	1.197842699	1.460977052	0.300773842	-0.315058297	-1.117953259	-1.726602201	0.713488578	0.636490883	1.591873889	-0.010217413	0.446977502	0.74010031	1.568142731	0.394875486	0.484942137	-0.611662814	-1.130769373	-0.140092436	0.146974467	0.017029548	-1.184000049	-0.188425032	-1.368372038	-0.74010031	-0.133217035	-0.160759774	-1.143773961	0.181496015	-1.460977052	-0.167663737	-0.6448541	-1.156974916	-0.492617885	1.270787244	0.508057465	-0.813797671	0.010217413
GRMZM2G088413	-0.823319923	0.636490883	-0.188425032	0.216235289	1.501786817	1.009990169	1.351202935	-0.09208509	0.500322766	-0.687372812	1.523165155	1.105318189	-0.987557182	0.794970891	-0.037471962	0.265322712	1.790524917	1.143773961	-0.785662535	-0.6448541	-0.462083086	0.484942137	-1.301946185	0.508057465	0.153863466	-0.813797671	1.403975696	1.068431117	1.032943298	-0.7490877	-2.645701413	0.322224522	-0.202310601	-0.508057465	0.446977502	1.825439172	0.343824517	-0.286550499	0.571095686	-0.628171949	-0.484942137	-0.661717677	-0.636490883	-2.468001988	-0.307908216	-1.523165155	-1.616536998	1.368372038	0.587206217
GRMZM2G018962	-0.571095686	0.105775004	0.704730028	-0.45451733	-0.133217035	-0.286550499	0.785662535	-1.757666049	-2.645701413	0.078412413	-1.441453795	-0.776421761	0.336607179	-0.500322766	-1.697120332	-1.501786817	0.595318735	0.776421761	0.794970891	1.790524917	-0.439462999	-0.862182757	-1.591873889	-1.056453949	-0.767246816	-0.731172307	-0.402250065	0.293654744	-0.315058297	0.987557182	1.523165155	0.017029548	0.484942137	0.322224522	-0.300773842	0.696025208	1.068431117	-0.237202109	-1.184000049	0.003405752	-0.563095926	-0.372878156	0.508057465	-0.892205847	0.424507616	1.616536998	-0.611662814	0.051108415	1.545263217
GRMZM2G179638	0.279460686	0.237202109	-1.143773961	-1.068431117	0.670220259	0.823319923	0.251237576	-0.202310601	-2.104600628	0.286550499	-0.244213829	0.794970891	-0.731172307	0.037471962	-0.484942137	-0.45451733	2.045954276	0.776421761	-0.51582268	0.767246816	-0.563095926	-0.7490877	-2.468001988	1.33442315	1.441453795	0.343824517	0.119484771	-0.998710851	0.563095926	-0.446977502	0.785662535	-0.365586148	-0.140092436	-0.119484771	1.170380633	0.852346618	0.862182757	-0.174575701	-1.726602201	1.143773961	-0.064754379	-1.616536998	0.071581727	-0.216235289	0.09208509	-0.209267873	0.223213218	0.010217413	0.587206217
GRMZM5G816135	-2.998020796	-2.645701413	-2.468001988	1.523165155	-2.345104662	-2.249880663	0.477294855	0.43197323	-2.045954276	0.6448541	2.104600628	2.645701413	0.424507616	0.813797671	-1.902810954	2.045954276	1.48107362	0.902393588	-1.862731867	0.251237576	-1.790524917	-1.757666049	-1.726602201	0.105775004	1.669043821	-1.697120332	0.446977502	-1.669043821	0.329407333	-1.642224543	-1.616536998	-1.568142731	-1.523165155	-1.48107362	-1.460977052	0.469675385	-1.441453795	-1.403975696	-0.140092436	0.696025208	-1.385954264	0.892205847	-1.368372038	-1.351202935	-1.33442315	0.272384894	-0.037471962	0.380190046	0.119484771
GRMZM2G393433	0.167663737	-0.358313528	0.085246759	0.661717677	-0.188425032	-2.998020796	-0.293654744	-0.43197323	1.33442315	-2.468001988	0.174575701	-0.555132042	-0.446977502	-0.670220259	0.539308633	0.619896262	0.051108415	-0.462083086	-0.409646587	0.595318735	-0.372878156	0.758136008	1.044626445	-0.954809756	0.112627241	-0.380190046	-0.595318735	0.409646587	-2.345104662	-2.249880663	0.119484771	-2.104600628	-0.508057465	-0.902393588	-0.731172307	-1.946202375	1.211918765	1.301946185	-1.902810954	0.998710851	0.882109877	0.098927729	0.767246816	0.872103029	0.687372812	1.697120332	-1.862731867	0.078412413	-0.105775004
GRMZM2G078324	-0.439462999	1.545263217	-0.085246759	0.636490883	-0.010217413	-1.009990169	2.045954276	-0.862182757	2.645701413	0.51582268	0.272384894	0.439462999	-0.35105981	-0.030656506	-0.83291742	-0.251237576	-1.211918765	-2.998020796	0.181496015	-1.642224543	-2.468001988	-2.345104662	1.130769373	-1.068431117	1.616536998	0.74010031	-1.591873889	0.477294855	0.322224522	0.071581727	-0.804348643	-0.417065588	0.462083086	-0.500322766	-1.368372038	-0.446977502	-0.653262666	1.021399468	-2.249880663	0.523619123	-1.318010897	0.45451733	-0.112627241	-0.09208509	0.547203211	-0.45451733	-1.669043821	-0.315058297	-0.181496015
GRMZM2G113056	1.441453795	-1.170380633	-0.547203211	0.484942137	0.579132162	0.358313528	0.167663737	-0.223213218	-2.645701413	0.933535639	-0.555132042	-0.202310601	0.722302208	-0.7490877	-0.976525035	0.078412413	2.104600628	1.318010897	-1.197842699	1.143773961	-0.579132162	1.48107362	-1.993601218	0.619896262	-1.056453949	-0.105775004	0.251237576	-1.616536998	-0.804348643	0.539308633	1.568142731	0.944119285	0.603470624	-1.422465003	-0.146974467	1.184000049	0.713488578	-0.209267873	-0.539308633	0.446977502	-0.010217413	-0.322224522	-1.255660378	-0.43197323	0.230202032	0.6448541	-0.892205847	-0.767246816	-0.823319923
GRMZM2G145041	1.170380633	1.501786817	1.117953259	-1.105318189	0.731172307	0.251237576	-0.230202032	-1.545263217	-1.523165155	0.188425032	1.080563549	-0.286550499	0.547203211	1.669043821	0.037471962	0.653262666	-0.6448541	0.174575701	1.385954264	0.923055543	0.670220259	0.044289159	0.555132042	0.965610478	2.104600628	-0.619896262	-0.037471962	0.722302208	0.126347925	-0.852346618	-0.030656506	0.265322712	0.704730028	-0.119484771	1.301946185	-1.021399468	-1.993601218	2.645701413	1.368372038	1.993601218	0.842592259	-0.678771572	0.030656506	-0.146974467	-1.368372038	0.293654744	2.345104662	-0.872103029	-1.642224543
GRMZM2G148281	-0.83291742	-0.394875486	1.286210621	-0.670220259	0.713488578	0.09208509	0.661717677	0.852346618	2.998020796	0.722302208	-1.255660378	1.143773961	2.345104662	-0.892205847	-0.902393588	0.923055543	0.272384894	0.174575701	0.758136008	-1.523165155	-0.051108415	-0.09208509	-0.43197323	1.117953259	-0.976525035	0.882109877	-0.064754379	1.48107362	0.492617885	1.351202935	0.523619123	-0.181496015	1.056453949	-2.468001988	-0.003405752	-0.91267586	-0.126347925	-0.446977502	0.35105981	-0.603470624	-2.645701413	-0.539308633	-0.329407333	-0.579132162	0.477294855	1.255660378	-0.987557182	-1.301946185	-0.51582268
GRMZM2G467134	-0.804348643	-0.555132042	0.279460686	0.892205847	1.501786817	-1.240815502	-0.51582268	-0.661717677	-0.823319923	-0.044289159	0.571095686	-0.216235289	0.477294855	0.030656506	0.687372812	0.017029548	0.322224522	-0.380190046	1.757666049	0.286550499	-1.993601218	-1.211918765	-0.469675385	-1.726602201	0.74010031	0.387522319	-0.687372812	0.813797671	-0.037471962	1.056453949	0.230202032	-0.307908216	0.223213218	0.508057465	-1.009990169	0.343824517	-0.251237576	0.181496015	1.170380633	-1.056453949	-1.441453795	0.167663737	-0.023842473	-0.731172307	-0.595318735	1.993601218	-0.146974467	1.021399468	-1.092857156
GRMZM2G415215	2.045954276	-0.439462999	-0.51582268	0.987557182	1.068431117	1.009990169	-0.500322766	0.017029548	-2.645701413	0.469675385	0.140092436	1.301946185	-0.365586148	-0.051108415	-0.45451733	0.619896262	1.33442315	0.758136008	-1.143773961	1.642224543	0.119484771	1.226239142	-1.993601218	0.83291742	0.244213829	0.358313528	0.74010031	-1.946202375	1.143773961	-0.237202109	0.372878156	1.993601218	0.842592259	-1.021399468	0.998710851	0.477294855	0.636490883	-1.044626445	-0.085246759	-0.272384894	0.500322766	-0.872103029	-1.441453795	-1.032943298	0.105775004	-0.315058297	-0.670220259	-0.484942137	-0.74010031
GRMZM2G056036	0.265322712	0.085246759	-1.301946185	1.318010897	0.439462999	-0.003405752	-0.160759774	0.322224522	-2.998020796	0.987557182	0.181496015	1.862731867	0.044289159	-1.318010897	-0.872103029	-1.130769373	-0.105775004	-0.587206217	-1.117953259	-0.119484771	-0.74010031	-0.126347925	-1.946202375	0.51582268	-0.057930049	-0.628171949	-0.484942137	-0.862182757	-0.722302208	0.842592259	1.545263217	0.003405752	1.226239142	-0.531447525	-0.523619123	1.591873889	0.862182757	-0.45451733	0.91267586	0.258273739	0.064754379	-0.051108415	0.09208509	0.126347925	0.329407333	0.722302208	-0.731172307	0.785662535	-0.417065588
AC235543.1_FG002	-0.823319923	0.112627241	0.923055543	-0.424507616	0.188425032	-0.563095926	0.315058297	0.6448541	-0.230202032	-2.345104662	-0.417065588	1.117953259	1.642224543	-0.785662535	-0.987557182	-0.794970891	-2.998020796	0.462083086	-0.343824517	-0.611662814	-0.954809756	-0.776421761	0.794970891	-0.462083086	0.358313528	-0.813797671	0.446977502	0.976525035	1.862731867	1.184000049	1.902810954	-0.704730028	0.7490877	-1.130769373	-0.030656506	0.307908216	-0.758136008	0.409646587	1.460977052	1.009990169	-1.255660378	1.286210621	0.823319923	-0.933535639	0.216235289	-1.441453795	-0.085246759	0.713488578	0.195363108
GRMZM2G353734	0.767246816	0.758136008	0.336607179	-0.010217413	0.133217035	1.255660378	1.460977052	-0.603470624	2.998020796	-1.080563549	0.09208509	1.545263217	-0.531447525	0.167663737	-0.547203211	-0.587206217	0.696025208	1.286210621	0.563095926	0.209267873	-0.174575701	-0.579132162	-0.402250065	1.032943298	-0.636490883	0.085246759	0.776421761	0.237202109	-1.156974916	-1.032943298	-2.998020796	0.43197323	-0.51582268	-0.017029548	-0.462083086	0.579132162	-0.670220259	1.130769373	-1.48107362	0.813797671	0.45451733	-0.300773842	-2.645701413	-2.468001988	-1.757666049	-0.794970891	-0.987557182	0.661717677	0.713488578
GRMZM2G020054	0.071581727	-0.484942137	-1.156974916	-0.272384894	-0.336607179	-1.240815502	0.140092436	-1.902810954	2.468001988	-1.523165155	-1.862731867	0.965610478	-0.492617885	-0.713488578	0.051108415	-0.307908216	-0.74010031	-1.143773961	-0.146974467	0.030656506	-1.757666049	-2.645701413	0.636490883	0.003405752	-0.286550499	-0.057930049	-0.661717677	0.595318735	0.195363108	-0.023842473	-0.987557182	-0.195363108	-0.010217413	0.237202109	-1.092857156	-0.251237576	0.628171949	-0.696025208	-0.202310601	1.068431117	-0.83291742	-0.230202032	2.249880663	2.645701413	1.568142731	-0.439462999	0.09208509	0.098927729	-0.153863466
GRMZM2G064608	-1.385954264	-0.523619123	-0.343824517	-1.032943298	-1.130769373	-0.085246759	0.439462999	-1.240815502	0.133217035	-0.394875486	-1.568142731	-1.068431117	0.722302208	0.579132162	-1.825439172	-2.045954276	0.417065588	0.6448541	1.056453949	-0.555132042	-0.965610478	-1.184000049	0.563095926	-1.946202375	0.336607179	-1.422465003	-0.696025208	1.080563549	0.017029548	1.286210621	0.126347925	-0.258273739	0.223213218	0.258273739	-1.226239142	-0.030656506	0.892205847	-0.167663737	0.469675385	0.380190046	-1.255660378	-0.636490883	1.460977052	0.547203211	0.216235289	0.91267586	-0.365586148	1.105318189	0.037471962
GRMZM2G024958	1.240815502	0.195363108	-0.862182757	2.645701413	1.368372038	0.611662814	0.653262666	-0.500322766	0.112627241	-0.998710851	0.365586148	-0.09208509	-0.842592259	-0.776421761	-0.365586148	-1.545263217	-0.402250065	0.424507616	-1.156974916	1.286210621	-0.322224522	-0.74010031	-0.954809756	0.315058297	0.279460686	0.09208509	1.790524917	1.044626445	0.343824517	-0.785662535	0.380190046	-0.731172307	-0.508057465	0.358313528	0.402250065	-0.336607179	0.882109877	-0.619896262	-1.697120332	-0.023842473	-0.017029548	-0.571095686	-0.202310601	-0.071581727	0.579132162	1.156974916	0.064754379	-0.003405752	0.619896262
GRMZM2G152888	1.523165155	-0.153863466	0.462083086	1.240815502	0.174575701	-0.258273739	1.286210621	0.492617885	-2.998020796	0.872103029	-1.080563549	1.170380633	1.790524917	0.322224522	-0.523619123	0.057930049	0.785662535	0.531447525	-0.547203211	-0.126347925	0.804348643	0.365586148	-1.757666049	0.188425032	0.794970891	-0.7490877	-1.825439172	-0.387522319	-0.343824517	1.545263217	1.946202375	0.051108415	0.758136008	-0.785662535	-0.279460686	1.368372038	0.852346618	0.6448541	0.998710851	-0.446977502	-1.211918765	-0.394875486	-0.133217035	-1.385954264	0.611662814	0.704730028	-1.568142731	0.244213829	0.484942137
GRMZM2G033199	0.336607179	0.678771572	-0.852346618	0.078412413	-0.023842473	-0.653262666	-0.380190046	-0.409646587	0.842592259	-0.037471962	0.230202032	0.794970891	0.7490877	-0.670220259	-1.422465003	-1.669043821	-0.181496015	-0.209267873	0.387522319	-0.010217413	-1.211918765	-1.403975696	-0.892205847	-0.105775004	-0.678771572	-0.365586148	-0.230202032	1.318010897	1.240815502	1.545263217	1.385954264	0.394875486	0.882109877	-1.48107362	-1.080563549	-0.237202109	0.45451733	1.301946185	-0.003405752	0.74010031	-0.933535639	0.417065588	-1.523165155	-1.368372038	-1.156974916	1.286210621	-0.133217035	0.587206217	0.286550499
GRMZM2G394410	-0.852346618	1.044626445	0.987557182	-1.156974916	-0.188425032	-0.661717677	0.555132042	-0.372878156	-2.468001988	0.09208509	-1.130769373	0.258273739	2.998020796	-0.343824517	-1.862731867	-0.336607179	-0.030656506	-0.628171949	-0.174575701	-0.531447525	-1.301946185	-0.216235289	-0.523619123	-1.422465003	2.104600628	-0.91267586	-0.813797671	0.619896262	1.105318189	2.045954276	1.286210621	-0.237202109	1.616536998	-1.545263217	0.251237576	0.508057465	-0.071581727	0.902393588	1.825439172	0.286550499	-2.104600628	0.933535639	0.998710851	-0.365586148	1.993601218	0.944119285	0.140092436	0.119484771	0.167663737
GRMZM2G399338	0.595318735	-0.244213829	-2.998020796	0.892205847	0.872103029	-0.329407333	-0.462083086	-0.842592259	-2.645701413	1.501786817	-0.372878156	-0.595318735	0.329407333	-0.531447525	-0.195363108	-0.09208509	0.439462999	-0.872103029	-2.468001988	1.044626445	0.017029548	1.33442315	-2.345104662	-0.167663737	0.105775004	0.678771572	-1.056453949	0.767246816	-2.171527717	0.322224522	-0.402250065	0.188425032	0.563095926	0.51582268	-0.619896262	1.48107362	-0.35105981	0.523619123	-0.804348643	0.670220259	1.441453795	0.237202109	0.446977502	0.293654744	0.153863466	-0.944119285	0.469675385	-0.713488578	-0.91267586
GRMZM2G015912	-0.902393588	0.085246759	0.923055543	0.758136008	-0.329407333	-0.933535639	0.653262666	0.181496015	-1.056453949	0.804348643	-0.813797671	0.547203211	1.790524917	1.021399468	0.6448541	0.286550499	-0.402250065	0.933535639	-0.998710851	0.587206217	0.265322712	0.636490883	-0.439462999	0.105775004	0.91267586	-0.469675385	-0.265322712	0.223213218	-0.202310601	-0.83291742	-2.645701413	-0.216235289	0.713488578	-0.133217035	-0.085246759	-0.446977502	0.098927729	-0.030656506	-1.130769373	-0.167663737	-0.477294855	0.83291742	0.017029548	-1.044626445	-0.293654744	0.998710851	0.902393588	2.345104662	0.678771572
GRMZM2G027958	0.587206217	0.237202109	-0.09208509	-0.064754379	0.687372812	-0.315058297	1.946202375	-1.197842699	2.998020796	1.068431117	-0.508057465	2.045954276	0.794970891	-0.030656506	0.216235289	0.965610478	0.037471962	0.105775004	1.523165155	-0.678771572	0.322224522	-0.785662535	0.954809756	-0.6448541	-0.862182757	0.098927729	-0.804348643	-0.140092436	0.258273739	1.130769373	-1.226239142	-1.240815502	-1.143773961	-1.301946185	-0.223213218	-0.998710851	-0.387522319	0.003405752	0.307908216	0.064754379	-0.923055543	1.143773961	1.211918765	0.678771572	1.403975696	-0.872103029	-0.017029548	-1.33442315	1.545263217
GRMZM2G324705	0.336607179	0.279460686	0.174575701	0.944119285	0.670220259	1.422465003	-1.33442315	-0.804348643	2.998020796	-0.902393588	0.365586148	-0.595318735	-0.336607179	0.933535639	-0.244213829	-0.619896262	-0.539308633	1.591873889	0.030656506	0.628171949	-1.757666049	-0.126347925	1.351202935	-0.43197323	0.343824517	-1.993601218	-0.555132042	1.184000049	0.74010031	0.611662814	1.757666049	0.265322712	-1.130769373	-0.477294855	0.322224522	-0.279460686	-0.237202109	0.272384894	-1.790524917	0.722302208	-0.181496015	-1.385954264	-0.322224522	-0.35105981	0.687372812	0.244213829	-0.394875486	0.555132042	-0.112627241
GRMZM2G015735	0.343824517	0.003405752	0.202310601	-0.146974467	0.45451733	0.91267586	-0.126347925	-0.696025208	-1.825439172	-0.140092436	-1.092857156	1.351202935	0.424507616	-0.500322766	-1.080563549	-0.882109877	1.021399468	0.794970891	-1.862731867	0.628171949	-0.358313528	-0.057930049	-1.286210621	0.146974467	-0.216235289	-1.105318189	-0.153863466	-0.785662535	1.184000049	-0.446977502	0.322224522	1.056453949	-0.085246759	-1.501786817	-0.003405752	0.976525035	-0.380190046	0.098927729	-0.965610478	1.697120332	-1.523165155	1.130769373	-1.545263217	-0.628171949	0.153863466	0.776421761	-0.731172307	0.195363108	0.661717677
GRMZM2G141925	-0.595318735	-0.315058297	-1.044626445	0.35105981	-0.09208509	-0.45451733	0.251237576	1.441453795	2.645701413	0.6448541	1.301946185	0.365586148	0.862182757	-1.48107362	0.933535639	1.501786817	-0.998710851	-0.976525035	2.045954276	-0.126347925	-0.882109877	-0.987557182	0.555132042	0.037471962	-0.230202032	0.731172307	-0.944119285	0.804348643	-1.697120332	-0.500322766	-1.385954264	-0.424507616	-0.670220259	-1.170380633	-0.258273739	0.119484771	0.174575701	0.265322712	-1.009990169	0.661717677	0.223213218	-0.322224522	-0.300773842	0.293654744	0.595318735	-0.336607179	-1.422465003	-0.030656506	-0.372878156
GRMZM2G039878	-0.140092436	0.439462999	-2.998020796	-2.645701413	-2.468001988	-2.345104662	0.160759774	-0.195363108	1.403975696	0.933535639	-2.104600628	1.170380633	1.351202935	-0.380190046	-0.223213218	-2.045954276	1.156974916	1.697120332	-1.993601218	0.469675385	-0.230202032	-1.902810954	-0.409646587	-0.358313528	1.460977052	0.322224522	-1.862731867	0.209267873	1.226239142	0.064754379	-1.825439172	0.547203211	-0.133217035	-0.563095926	-1.790524917	-1.757666049	-1.726602201	0.823319923	0.329407333	0.051108415	-0.508057465	0.044289159	0.595318735	-0.064754379	0.965610478	1.009990169	0.085246759	-1.697120332	0.954809756
GRMZM2G132162	-1.568142731	0.230202032	0.372878156	1.130769373	-0.998710851	-1.021399468	1.441453795	-1.862731867	-1.642224543	-1.156974916	-2.045954276	1.226239142	1.616536998	0.636490883	-2.171527717	-0.563095926	-0.611662814	-0.965610478	1.301946185	0.439462999	0.133217035	-2.249880663	1.403975696	0.293654744	1.757666049	-0.409646587	-0.678771572	0.785662535	0.003405752	0.216235289	1.211918765	1.240815502	1.385954264	0.057930049	-0.372878156	0.43197323	0.223213218	-0.300773842	0.987557182	1.862731867	-0.439462999	0.409646587	-0.237202109	-0.365586148	0.539308633	1.48107362	-0.085246759	-0.112627241	0.923055543
GRMZM2G339091	-0.181496015	0.329407333	0.181496015	0.417065588	0.687372812	-0.300773842	-0.776421761	-0.380190046	1.642224543	-0.670220259	-0.272384894	-0.636490883	0.813797671	0.653262666	0.6448541	-1.351202935	1.105318189	1.184000049	-0.023842473	-0.126347925	0.661717677	-0.687372812	-0.547203211	1.286210621	-0.439462999	-0.813797671	-0.696025208	1.068431117	0.146974467	0.636490883	0.133217035	0.307908216	-1.156974916	-1.422465003	-0.003405752	-0.085246759	0.785662535	0.265322712	-1.226239142	-0.571095686	-0.678771572	0.424507616	0.174575701	-0.45451733	-0.037471962	-0.336607179	-0.619896262	0.030656506	-1.385954264
GRMZM2G036905	0.010217413	-1.48107362	-1.642224543	0.071581727	0.030656506	-1.669043821	-1.902810954	-0.523619123	-1.009990169	-0.160759774	1.48107362	0.587206217	-1.286210621	-1.825439172	-1.385954264	1.568142731	0.678771572	-1.862731867	1.130769373	1.351202935	-1.117953259	-1.021399468	-0.424507616	-0.286550499	1.318010897	0.140092436	0.188425032	0.696025208	-0.078412413	1.009990169	0.358313528	0.611662814	0.563095926	0.603470624	0.469675385	-0.6448541	-0.571095686	-0.500322766	0.402250065	0.35105981	0.380190046	-0.670220259	1.993601218	0.954809756	0.417065588	0.133217035	-0.933535639	-0.119484771	0.776421761
GRMZM2G145360	0.892205847	-0.852346618	-0.030656506	0.372878156	0.555132042	2.998020796	-0.842592259	0.017029548	-2.645701413	1.226239142	0.300773842	1.156974916	0.195363108	-0.402250065	-0.628171949	0.322224522	0.704730028	0.6448541	-0.722302208	0.216235289	0.713488578	2.045954276	-1.726602201	1.351202935	-1.021399468	-0.358313528	0.611662814	-1.351202935	1.021399468	-0.51582268	1.130769373	-0.010217413	-0.343824517	-0.933535639	-0.119484771	0.687372812	0.387522319	-0.965610478	-0.571095686	0.976525035	-0.603470624	0.167663737	-1.825439172	-1.669043821	0.251237576	-0.017029548	-1.105318189	-0.687372812	-1.117953259
GRMZM2G007103	0.531447525	-0.477294855	-0.531447525	1.211918765	0.976525035	-1.184000049	0.45451733	-0.91267586	-2.645701413	0.469675385	0.223213218	1.184000049	0.188425032	0.563095926	0.862182757	0.09208509	-0.279460686	-1.021399468	0.380190046	-0.394875486	-1.240815502	-0.146974467	0.713488578	0.112627241	-0.547203211	-0.539308633	-0.902393588	0.336607179	-0.35105981	1.368372038	-0.010217413	0.160759774	1.642224543	0.987557182	-0.017029548	1.009990169	0.944119285	0.758136008	-0.661717677	0.140092436	-0.998710851	0.286550499	0.923055543	0.785662535	-0.469675385	0.704730028	0.731172307	1.351202935	0.852346618
GRMZM2G125263	-1.286210621	-0.044289159	0.603470624	-0.35105981	0.43197323	0.153863466	0.661717677	-0.202310601	-0.216235289	0.078412413	1.48107362	-2.998020796	1.211918765	0.188425032	-0.696025208	-0.704730028	0.785662535	1.117953259	0.933535639	0.258273739	-1.068431117	0.976525035	-1.270787244	-0.785662535	-0.976525035	-2.645701413	0.619896262	-0.91267586	-0.272384894	-2.468001988	-0.329407333	1.385954264	1.825439172	0.365586148	-0.823319923	0.402250065	2.645701413	-1.301946185	-0.265322712	-0.619896262	0.380190046	0.731172307	-2.345104662	-0.83291742	0.902393588	1.130769373	-0.343824517	0.140092436	0.531447525
GRMZM2G515226	1.143773961	0.678771572	-2.998020796	0.358313528	0.704730028	-2.645701413	1.255660378	-0.758136008	-2.468001988	0.83291742	0.195363108	1.044626445	0.944119285	-0.687372812	0.140092436	1.056453949	1.790524917	1.946202375	-0.105775004	0.43197323	0.611662814	0.804348643	2.104600628	0.153863466	-2.249880663	1.021399468	0.105775004	-0.51582268	-2.104600628	0.044289159	-0.678771572	-0.258273739	-0.43197323	1.460977052	-0.402250065	-0.439462999	0.758136008	0.619896262	-0.188425032	2.345104662	-0.500322766	0.923055543	-0.785662535	1.385954264	-0.146974467	2.998020796	1.240815502	1.825439172	0.315058297
GRMZM2G010551	0.852346618	0.636490883	-0.539308633	0.209267873	-0.286550499	0.603470624	1.130769373	-1.044626445	-0.794970891	0.300773842	-0.91267586	0.126347925	0.439462999	0.785662535	-0.813797671	0.010217413	1.197842699	0.446977502	-0.563095926	-0.661717677	0.174575701	0.563095926	-1.862731867	-0.071581727	-0.704730028	-0.653262666	-1.117953259	-1.143773961	-0.167663737	-0.862182757	-0.202310601	-0.944119285	0.044289159	-0.064754379	0.071581727	1.33442315	-1.33442315	0.722302208	1.441453795	0.380190046	0.078412413	0.336607179	0.587206217	-2.045954276	-0.098927729	0.43197323	-0.902393588	-2.171527717	-0.687372812
GRMZM2G035592	0.45451733	-1.790524917	-0.417065588	0.417065588	0.387522319	-0.209267873	-1.044626445	-0.315058297	0.402250065	0.852346618	0.944119285	1.105318189	-1.255660378	0.343824517	0.133217035	-0.892205847	1.056453949	-0.230202032	-1.591873889	1.33442315	-2.645701413	-1.993601218	0.126347925	0.258273739	-0.531447525	-0.813797671	0.653262666	-1.862731867	-0.126347925	1.385954264	1.044626445	-0.523619123	1.143773961	-1.697120332	-0.402250065	-0.044289159	0.244213829	-0.098927729	-0.619896262	-0.300773842	-1.032943298	0.804348643	-0.794970891	0.813797671	0.539308633	1.616536998	-0.394875486	1.523165155	1.021399468
GRMZM2G004908	1.117953259	-0.653262666	-0.188425032	0.776421761	0.343824517	1.993601218	-0.322224522	0.237202109	-2.345104662	0.987557182	-0.315058297	0.133217035	-0.064754379	-0.678771572	0.037471962	-0.071581727	0.563095926	0.804348643	-1.825439172	1.270787244	0.140092436	0.872103029	-1.301946185	0.852346618	0.071581727	0.696025208	1.318010897	-1.460977052	-0.51582268	-0.804348643	-0.83291742	1.226239142	-0.531447525	-1.117953259	0.595318735	1.616536998	1.902810954	-0.611662814	-0.713488578	0.372878156	0.195363108	-0.539308633	-1.697120332	-1.757666049	1.368372038	-0.372878156	-0.91267586	-0.661717677	-0.358313528
[truncated: 248 more columns]
