# Supplementary material for: Verification of Three-Phase Dependency Analysis Bayesian Network Learning Method for Maize Carotenoid Gene Mining
Source: Biomed Res Int. 2017 Jul 30;2017:1813494. doi: 10.1155/2017/1813494 (PMC5554554; doi:10.1155/2017/1813494)
Supplement: Supplementary file 1 — The experiment data 1 of 109 nodes, the experiment data 2 of 109 nodes, and so on are shown here. [file 1813494.f1.zip › Supplementary material/Gene100_3.csv]

V1	V2	V3	V4	V5	V6	V7	V8	V9	V10	V11	V12	V13	V14	V15	V16	V17	V18	V19	V20	V21	V22	V23	V24	V25	V26	V27	V28	V29	V30	V31	V32	V33	V34	V35	V36	V37	V38	V39	V40	V41	V42	V43	V44	V45	V46	V47	V48	V49	V50
GRMZM2G134341	0.678771572	-0.523619123	1.48107362	-0.74010031	-1.068431117	-0.539308633	0.394875486	-1.993601218	2.998020796	-0.394875486	-0.477294855	0.636490883	2.249880663	-1.226239142	-1.021399468	-1.009990169	-0.713488578	-0.140092436	1.226239142	-0.469675385	-0.987557182	-1.184000049	0.653262666	-0.098927729	1.862731867	-0.611662814	-1.568142731	1.946202375	0.051108415	-0.387522319	-0.105775004	-1.460977052	0.409646587	-0.976525035	-0.051108415	0.417065588	0.307908216	1.009990169	0.767246816	0.563095926	-0.785662535	0.862182757	0.74010031	-0.508057465	0.469675385	-0.003405752	-0.174575701	0.343824517	-0.417065588
GRMZM2G148074	-0.439462999	0.91267586	0.258273739	0.336607179	0.307908216	-0.237202109	0.628171949	-1.385954264	2.345104662	-0.704730028	-1.33442315	1.080563549	2.171527717	-0.372878156	-0.343824517	0.380190046	-0.628171949	-0.462083086	1.697120332	0.670220259	-0.380190046	-1.48107362	0.272384894	-0.387522319	1.021399468	0.571095686	1.441453795	1.286210621	1.33442315	0.195363108	-2.345104662	-0.571095686	0.636490883	-1.523165155	0.300773842	-0.6448541	-1.056453949	0.758136008	-0.329407333	0.804348643	-0.923055543	-1.757666049	1.105318189	-0.044289159	1.48107362	0.923055543	-0.804348643	-0.064754379	0.43197323
GRMZM2G006452	2.249880663	-0.74010031	-0.387522319	0.523619123	1.009990169	1.056453949	0.244213829	-0.670220259	-2.645701413	0.372878156	-0.35105981	0.469675385	-0.731172307	0.358313528	-0.209267873	0.402250065	1.616536998	0.696025208	-2.104600628	1.286210621	0.051108415	2.171527717	-2.345104662	1.143773961	1.642224543	0.417065588	-0.023842473	-1.993601218	0.223213218	0.315058297	-0.003405752	1.568142731	-0.587206217	-0.508057465	1.170380633	0.74010031	1.48107362	-0.531447525	0.153863466	-0.160759774	-0.09208509	-1.197842699	-0.477294855	-0.329407333	-0.078412413	-0.223213218	-0.862182757	-0.126347925	-0.258273739
GRMZM2G447795	-0.492617885	0.539308633	0.902393588	1.385954264	0.230202032	0.188425032	-0.315058297	-1.568142731	1.422465003	1.669043821	-0.394875486	2.171527717	2.998020796	0.661717677	0.322224522	-0.998710851	-0.603470624	0.944119285	-2.045954276	0.167663737	0.237202109	0.619896262	0.023842473	1.403975696	1.032943298	-1.105318189	-0.037471962	1.523165155	0.315058297	1.642224543	-0.209267873	-0.35105981	1.117953259	1.105318189	-0.174575701	-0.965610478	-0.307908216	1.044626445	0.767246816	1.48107362	-1.197842699	-0.555132042	0.279460686	0.484942137	0.387522319	-0.813797671	0.160759774	1.080563549	0.722302208
GRMZM2G144367	-2.468001988	0.477294855	-1.105318189	0.998710851	-1.044626445	-1.790524917	-0.251237576	0.902393588	-2.998020796	-0.105775004	-0.619896262	0.300773842	0.329407333	0.547203211	0.571095686	-0.678771572	-1.825439172	-0.523619123	0.555132042	0.563095926	0.469675385	-2.045954276	0.071581727	-0.933535639	-1.902810954	-1.318010897	-0.987557182	1.669043821	-1.48107362	1.33442315	1.170380633	-0.603470624	-0.064754379	0.767246816	-1.301946185	-0.417065588	-0.35105981	-0.044289159	0.057930049	0.105775004	-0.286550499	-0.195363108	0.954809756	0.687372812	-0.315058297	-0.272384894	-0.336607179	0.758136008	0.500322766
GRMZM2G499981	0.923055543	0.293654744	0.216235289	0.767246816	1.021399468	0.539308633	-0.462083086	-0.329407333	-0.188425032	1.726602201	1.351202935	2.104600628	0.563095926	-1.117953259	1.568142731	0.195363108	0.823319923	0.523619123	-0.09208509	0.902393588	0.587206217	0.439462999	-1.669043821	1.790524917	0.322224522	-1.501786817	-1.255660378	0.965610478	0.862182757	-0.057930049	0.636490883	-0.51582268	-0.237202109	1.545263217	0.804348643	0.343824517	1.117953259	-0.7490877	0.619896262	0.954809756	-0.976525035	-1.385954264	-1.301946185	-0.852346618	-0.523619123	-0.307908216	-1.616536998	-0.508057465	-0.872103029
GRMZM5G858317	1.616536998	-0.365586148	-0.636490883	0.83291742	1.156974916	0.358313528	-0.484942137	-1.642224543	-2.249880663	0.862182757	0.394875486	1.318010897	-0.188425032	-1.009990169	-0.078412413	0.230202032	0.998710851	0.523619123	0.603470624	0.09208509	-1.117953259	-1.240815502	-1.862731867	1.48107362	1.130769373	-0.272384894	0.678771572	-0.43197323	0.563095926	-1.403975696	-1.993601218	1.568142731	-0.547203211	-0.492617885	1.33442315	-0.112627241	0.023842473	-1.568142731	0.462083086	-0.595318735	-0.813797671	-0.216235289	0.329407333	-0.653262666	0.823319923	0.372878156	-1.211918765	0.153863466	0.003405752
GRMZM2G002142	2.045954276	1.170380633	1.862731867	0.987557182	-2.998020796	-2.645701413	-2.468001988	-0.258273739	1.143773961	-2.249880663	-2.171527717	0.105775004	2.645701413	0.661717677	0.892205847	0.030656506	0.6448541	0.731172307	-2.104600628	0.862182757	1.568142731	0.35105981	1.255660378	0.446977502	-2.045954276	0.409646587	-0.315058297	0.244213829	0.365586148	0.954809756	0.336607179	0.181496015	0.372878156	0.902393588	1.385954264	-0.017029548	0.523619123	-0.037471962	1.757666049	0.153863466	0.133217035	1.642224543	-1.946202375	-1.902810954	-1.862731867	1.545263217	-1.825439172	0.057930049	0.195363108
GRMZM5G846811	1.616536998	1.032943298	0.731172307	0.003405752	-0.394875486	1.226239142	0.571095686	-0.153863466	-2.249880663	0.140092436	-0.998710851	0.653262666	-0.010217413	-0.146974467	-0.279460686	-0.417065588	-0.078412413	0.933535639	-0.358313528	1.669043821	-0.293654744	-0.112627241	-0.380190046	0.119484771	1.726602201	0.500322766	-0.976525035	-0.272384894	0.329407333	-0.030656506	0.74010031	0.064754379	-0.500322766	-1.286210621	0.174575701	0.882109877	-1.385954264	1.33442315	-1.318010897	-0.439462999	-1.825439172	-0.882109877	1.270787244	0.051108415	0.704730028	0.279460686	0.902393588	-0.696025208	1.422465003
GRMZM2G302323	1.226239142	-1.056453949	-1.080563549	0.439462999	0.223213218	1.197842699	0.842592259	0.380190046	-2.104600628	0.892205847	-0.153863466	2.045954276	0.804348643	-0.484942137	-0.628171949	-0.965610478	1.460977052	0.628171949	-0.322224522	1.790524917	0.944119285	1.669043821	-2.468001988	0.402250065	0.731172307	-1.009990169	-0.813797671	-1.422465003	0.244213829	-0.394875486	1.255660378	0.965610478	-0.017029548	-0.133217035	-0.105775004	1.240815502	1.056453949	-1.092857156	-0.35105981	-0.45451733	-0.74010031	-0.661717677	-1.790524917	-0.687372812	0.83291742	-0.365586148	-1.170380633	0.126347925	0.202310601
GRMZM2G019500	-1.568142731	0.484942137	0.380190046	-1.351202935	-1.385954264	-0.523619123	-0.085246759	0.146974467	-1.697120332	-2.104600628	-2.345104662	-1.591873889	0.713488578	-0.713488578	-2.045954276	-1.105318189	-0.804348643	-0.43197323	-0.91267586	0.492617885	0.500322766	-0.35105981	-1.441453795	-0.813797671	-0.119484771	0.387522319	0.230202032	-1.184000049	2.045954276	-0.098927729	0.09208509	-0.216235289	0.611662814	-0.424507616	-0.776421761	0.424507616	1.092857156	-0.195363108	1.790524917	0.731172307	-0.687372812	-0.265322712	0.892205847	-1.211918765	0.813797671	1.270787244	1.143773961	0.064754379	0.307908216
AC198937.4_FG003	0.998710851	1.441453795	0.51582268	0.687372812	-2.998020796	-2.645701413	-2.468001988	-2.345104662	-2.249880663	0.987557182	0.767246816	0.954809756	2.998020796	1.184000049	0.244213829	-2.171527717	0.74010031	-2.104600628	-2.045954276	1.197842699	-1.993601218	-1.946202375	-1.902810954	0.35105981	-1.862731867	0.7490877	-1.790524917	0.892205847	-1.757666049	1.117953259	0.842592259	-1.726602201	0.322224522	1.33442315	-1.697120332	-1.669043821	-1.642224543	2.045954276	2.468001988	0.794970891	-1.591873889	0.563095926	-1.568142731	-1.545263217	1.790524917	0.462083086	-0.010217413	0.372878156	0.146974467
GRMZM2G136486	1.032943298	-0.279460686	-0.085246759	0.555132042	1.270787244	0.223213218	0.358313528	0.661717677	-1.286210621	1.697120332	1.726602201	-0.223213218	2.998020796	0.071581727	1.226239142	0.300773842	-0.372878156	1.318010897	0.085246759	0.43197323	-0.696025208	0.579132162	1.092857156	-0.670220259	0.372878156	0.209267873	0.678771572	1.33442315	0.279460686	1.902810954	0.010217413	-0.804348643	0.670220259	-2.645701413	-0.037471962	-0.300773842	0.776421761	0.892205847	1.211918765	1.184000049	0.153863466	0.293654744	0.387522319	-0.813797671	-0.380190046	-0.492617885	-0.336607179	0.244213829	0.508057465
GRMZM2G010468	0.023842473	1.286210621	-0.112627241	-0.696025208	-0.776421761	-0.547203211	-0.023842473	0.244213829	0.653262666	1.240815502	-0.74010031	0.446977502	0.767246816	0.603470624	-0.531447525	-0.188425032	0.508057465	0.167663737	-0.329407333	-0.954809756	1.422465003	0.085246759	0.078412413	-0.409646587	-0.595318735	-1.697120332	0.987557182	0.230202032	2.171527717	0.965610478	-0.071581727	0.223213218	1.523165155	0.010217413	-0.030656506	-0.492617885	-0.51582268	1.009990169	1.862731867	0.862182757	-0.628171949	2.345104662	0.307908216	-1.156974916	-0.636490883	-0.336607179	0.954809756	0.044289159	1.021399468
GRMZM2G096051	-0.523619123	-1.056453949	-0.174575701	-0.7490877	-0.188425032	-0.112627241	0.112627241	-1.032943298	-2.998020796	0.954809756	-0.500322766	-0.43197323	-0.223213218	0.037471962	-0.91267586	-0.258273739	0.057930049	0.244213829	0.794970891	0.293654744	-1.044626445	-0.044289159	-1.286210621	0.119484771	0.105775004	-0.153863466	-0.307908216	-0.842592259	-0.6448541	0.230202032	0.547203211	0.492617885	0.336607179	1.422465003	-0.380190046	1.726602201	1.642224543	-0.387522319	-1.48107362	0.402250065	-0.343824517	-0.133217035	0.329407333	-0.804348643	0.051108415	0.713488578	0.09208509	-0.998710851	0.767246816
AC196171.6_FG002	-0.343824517	0.954809756	0.804348643	-2.998020796	-0.329407333	-2.645701413	0.071581727	-0.45451733	-0.508057465	-2.468001988	-0.216235289	0.329407333	2.171527717	-2.249880663	-2.171527717	0.336607179	-2.104600628	0.628171949	-2.045954276	0.174575701	1.021399468	-0.372878156	-1.993601218	0.358313528	-1.946202375	-1.902810954	-1.862731867	2.645701413	0.785662535	0.842592259	0.35105981	-0.477294855	2.998020796	-1.790524917	1.862731867	0.862182757	1.385954264	0.539308633	0.462083086	-0.017029548	-1.757666049	2.045954276	0.794970891	0.146974467	1.993601218	1.545263217	0.579132162	1.825439172	1.197842699
GRMZM2G096812	-0.307908216	0.037471962	-0.023842473	-0.661717677	-1.170380633	-0.336607179	0.872103029	-1.226239142	0.611662814	-1.301946185	-0.43197323	-2.998020796	1.226239142	0.619896262	-0.35105981	-0.794970891	0.409646587	-0.037471962	-2.645701413	-0.523619123	1.616536998	1.403975696	0.43197323	0.329407333	0.057930049	-0.7490877	-0.358313528	0.237202109	1.48107362	0.492617885	1.156974916	0.998710851	0.813797671	1.726602201	0.258273739	0.892205847	0.758136008	-2.468001988	-0.892205847	0.923055543	-0.424507616	-0.595318735	-0.105775004	1.545263217	0.195363108	-0.713488578	-2.345104662	1.351202935	0.653262666
GRMZM2G123987	-0.133217035	0.133217035	-0.279460686	1.757666049	1.240815502	-0.230202032	0.794970891	-1.117953259	-2.998020796	2.104600628	0.365586148	1.790524917	-0.563095926	0.813797671	0.216235289	0.823319923	0.244213829	0.078412413	1.825439172	0.265322712	-1.211918765	0.785662535	-1.946202375	0.51582268	-1.441453795	-1.460977052	0.279460686	0.085246759	-0.862182757	-0.892205847	-0.181496015	-0.380190046	-0.439462999	1.105318189	-0.417065588	1.523165155	0.202310601	-0.508057465	-0.003405752	0.174575701	1.211918765	-0.555132042	-0.603470624	-0.83291742	-0.661717677	-0.251237576	-0.492617885	0.293654744	0.35105981
GRMZM2G100084	0.892205847	0.181496015	1.48107362	-0.322224522	-0.842592259	0.944119285	0.09208509	-0.776421761	-1.056453949	-0.587206217	-1.068431117	-0.469675385	-1.009990169	0.112627241	-1.460977052	-0.892205847	0.603470624	-0.181496015	0.439462999	0.933535639	-1.591873889	-0.603470624	-0.329407333	-0.272384894	1.351202935	-0.003405752	0.902393588	-0.336607179	-0.017029548	0.051108415	0.477294855	1.545263217	0.998710851	-1.318010897	-0.112627241	0.216235289	0.140092436	0.307908216	-0.140092436	0.91267586	-1.726602201	-0.579132162	-0.758136008	-1.130769373	0.153863466	-0.372878156	-0.555132042	-0.484942137	2.998020796
GRMZM2G446426	-0.987557182	-1.669043821	-1.790524917	-0.965610478	0.140092436	-1.270787244	-1.143773961	0.044289159	-1.021399468	-1.080563549	0.230202032	-0.181496015	1.993601218	-1.501786817	-0.661717677	-0.085246759	-1.351202935	-1.044626445	0.776421761	0.653262666	-1.441453795	-2.345104662	-0.976525035	-0.785662535	2.045954276	-2.045954276	-0.670220259	0.272384894	-2.998020796	0.823319923	0.555132042	0.195363108	0.126347925	-0.619896262	-0.579132162	0.051108415	1.143773961	-1.301946185	1.422465003	-0.119484771	-0.678771572	-0.037471962	1.48107362	0.713488578	0.722302208	0.477294855	0.492617885	0.251237576	-0.258273739
GRMZM2G151726	-0.064754379	0.933535639	0.484942137	0.265322712	0.417065588	-0.776421761	1.068431117	-1.351202935	2.249880663	-0.704730028	-1.318010897	1.044626445	1.460977052	-1.422465003	-0.902393588	-2.249880663	0.051108415	0.852346618	-0.794970891	-1.211918765	-0.279460686	-0.862182757	0.563095926	0.023842473	1.902810954	-0.731172307	-0.713488578	2.171527717	0.462083086	0.987557182	0.976525035	-0.209267873	0.140092436	-1.009990169	0.523619123	-1.184000049	-1.591873889	1.33442315	0.944119285	1.591873889	-1.726602201	0.251237576	1.48107362	0.258273739	0.119484771	1.130769373	0.365586148	1.616536998	0.83291742
GRMZM2G154442	1.105318189	0.188425032	0.394875486	0.023842473	0.43197323	1.184000049	0.804348643	-0.611662814	-0.251237576	-0.343824517	2.104600628	2.998020796	0.603470624	0.160759774	-0.785662535	-0.133217035	0.902393588	1.009990169	0.153863466	0.126347925	0.587206217	0.731172307	1.545263217	1.143773961	0.329407333	1.669043821	-0.619896262	0.872103029	1.616536998	0.758136008	1.460977052	0.209267873	0.91267586	0.892205847	-0.365586148	0.987557182	-0.758136008	0.174575701	-0.372878156	0.051108415	0.661717677	-2.998020796	-2.645701413	-0.696025208	-0.731172307	1.403975696	1.156974916	-0.402250065	1.642224543
GRMZM2G170262	0.862182757	-0.244213829	-0.307908216	0.91267586	0.133217035	-0.872103029	0.785662535	-1.301946185	2.645701413	1.056453949	0.696025208	1.270787244	1.790524917	0.167663737	0.023842473	-0.167663737	-0.153863466	0.713488578	-1.021399468	-0.653262666	0.7490877	-1.697120332	0.882109877	-0.030656506	0.6448541	-0.402250065	-0.336607179	1.032943298	-0.862182757	1.669043821	-0.687372812	0.286550499	1.143773961	0.394875486	-0.998710851	0.202310601	-0.563095926	0.965610478	-0.804348643	0.343824517	-1.422465003	-1.117953259	0.251237576	0.402250065	-0.315058297	0.45451733	-0.661717677	-0.258273739	0.636490883
GRMZM2G538535	1.368372038	2.345104662	1.184000049	0.380190046	-1.092857156	1.591873889	-1.211918765	0.064754379	-0.678771572	0.628171949	-1.184000049	0.010217413	2.998020796	-0.380190046	1.170380633	-1.170380633	1.669043821	1.862731867	-0.902393588	0.872103029	0.492617885	0.160759774	0.343824517	1.403975696	1.080563549	0.531447525	0.112627241	0.74010031	-0.057930049	0.998710851	0.202310601	0.547203211	0.976525035	-0.286550499	0.579132162	1.460977052	-0.230202032	-0.181496015	0.882109877	1.726602201	-0.508057465	-0.776421761	-0.628171949	-1.568142731	-0.933535639	-0.439462999	-1.501786817	-2.045954276	-0.976525035
GRMZM2G056079	1.270787244	-0.188425032	0.628171949	0.300773842	-1.726602201	0.619896262	0.954809756	-0.402250065	-1.501786817	0.216235289	-0.603470624	1.523165155	0.653262666	-0.003405752	-0.571095686	0.722302208	0.74010031	1.170380633	0.146974467	1.318010897	-1.757666049	-0.713488578	-0.813797671	0.579132162	1.068431117	-0.852346618	0.484942137	-1.946202375	-0.477294855	-0.74010031	-1.591873889	-0.944119285	-0.687372812	-1.105318189	-1.156974916	1.825439172	-0.409646587	-0.424507616	1.33442315	1.105318189	1.902810954	-0.523619123	0.794970891	1.286210621	0.636490883	-0.167663737	0.35105981	-0.628171949	-0.704730028
GRMZM2G469873	0.307908216	0.446977502	-0.133217035	0.595318735	0.687372812	0.842592259	0.531447525	-0.794970891	-2.998020796	1.48107362	-0.010217413	1.385954264	1.993601218	-0.439462999	-0.892205847	0.380190046	-0.202310601	-1.993601218	0.244213829	-0.555132042	-1.790524917	-0.160759774	-0.678771572	0.722302208	-0.358313528	-0.882109877	-1.009990169	-0.758136008	-0.329407333	-1.351202935	0.251237576	0.329407333	-0.670220259	-0.195363108	-0.126347925	-0.45451733	-0.153863466	-0.119484771	0.230202032	0.188425032	0.037471962	0.023842473	-2.104600628	-0.531447525	0.579132162	0.539308633	-1.184000049	-0.417065588	-0.804348643
GRMZM2G098078	0.933535639	-0.202310601	0.010217413	1.056453949	0.322224522	0.74010031	0.119484771	0.6448541	-2.171527717	0.195363108	-0.670220259	1.009990169	0.794970891	-0.300773842	-0.902393588	-0.244213829	0.023842473	1.441453795	-1.48107362	1.790524917	-0.45451733	-0.051108415	-1.825439172	0.167663737	0.661717677	-0.387522319	0.462083086	-1.568142731	-0.044289159	0.044289159	0.704730028	-0.628171949	-0.35105981	-1.117953259	0.923055543	1.032943298	0.365586148	0.003405752	-0.322224522	-0.603470624	0.358313528	-0.126347925	-1.286210621	-1.501786817	0.230202032	0.619896262	0.83291742	-0.547203211	-0.279460686
GRMZM2G039383	2.645701413	-2.998020796	1.130769373	0.133217035	0.611662814	1.170380633	-2.645701413	-2.468001988	1.757666049	-2.249880663	1.318010897	0.112627241	0.661717677	0.064754379	-2.045954276	-1.993601218	1.009990169	-1.946202375	-1.902810954	1.862731867	-1.862731867	-1.825439172	0.160759774	2.998020796	-1.790524917	1.385954264	0.555132042	-1.757666049	0.713488578	-1.726602201	-1.697120332	-1.669043821	-1.616536998	0.944119285	0.358313528	0.439462999	-1.545263217	1.032943298	-1.501786817	-1.48107362	-1.460977052	-1.441453795	1.270787244	-1.422465003	-1.403975696	-1.385954264	0.09208509	0.202310601	1.441453795
GRMZM2G090435	-2.998020796	1.790524917	2.104600628	1.068431117	0.244213829	-2.645701413	-0.439462999	-2.468001988	-2.249880663	-0.258273739	-0.336607179	1.156974916	0.555132042	-2.104600628	-0.286550499	0.071581727	-0.188425032	-2.045954276	1.523165155	-1.993601218	-1.946202375	-1.902810954	0.216235289	0.085246759	-1.862731867	-1.825439172	0.902393588	2.645701413	-1.757666049	0.813797671	-1.726602201	-0.477294855	0.230202032	-1.642224543	-0.484942137	-1.616536998	-1.591873889	-1.568142731	-1.545263217	1.117953259	-1.523165155	0.119484771	-1.501786817	0.446977502	1.501786817	0.687372812	0.43197323	0.300773842	0.409646587
GRMZM2G032315	0.439462999	0.216235289	0.105775004	0.394875486	0.146974467	-1.105318189	0.74010031	-1.255660378	1.946202375	1.441453795	1.591873889	0.531447525	1.170380633	0.785662535	-0.010217413	0.687372812	-0.085246759	-0.83291742	0.251237576	-1.068431117	-0.713488578	-0.722302208	1.460977052	-1.056453949	0.776421761	-0.51582268	0.023842473	1.48107362	-0.098927729	1.032943298	0.112627241	0.037471962	0.329407333	0.882109877	0.279460686	-0.439462999	0.209267873	0.098927729	-0.017029548	-1.368372038	-2.345104662	-1.130769373	1.616536998	1.301946185	-0.216235289	-0.160759774	0.322224522	0.017029548	-0.424507616
GRMZM2G170016	-0.43197323	-0.933535639	-0.315058297	1.105318189	0.258273739	-1.385954264	-0.244213829	0.365586148	-0.852346618	1.270787244	0.380190046	-2.998020796	-0.965610478	-0.477294855	-0.547203211	-0.098927729	-0.010217413	0.322224522	1.130769373	-1.197842699	0.862182757	1.032943298	-0.531447525	-1.368372038	0.687372812	-0.133217035	-2.645701413	-2.468001988	-1.021399468	1.226239142	-1.226239142	-0.202310601	-1.009990169	-0.83291742	-1.240815502	-0.794970891	-0.394875486	1.642224543	0.126347925	0.409646587	-0.402250065	1.318010897	-0.044289159	-0.45451733	0.628171949	0.555132042	0.965610478	0.469675385	0.293654744
GRMZM2G161988	-0.587206217	0.872103029	-0.044289159	-0.6448541	-0.523619123	-0.030656506	0.380190046	-1.211918765	-2.468001988	-0.579132162	0.244213829	0.508057465	2.345104662	0.954809756	-1.130769373	-0.315058297	0.571095686	0.078412413	-0.09208509	0.776421761	-1.460977052	0.146974467	-0.902393588	0.424507616	-1.501786817	-0.322224522	-1.862731867	0.547203211	-0.265322712	1.697120332	1.403975696	-0.251237576	1.862731867	-1.545263217	-0.35105981	-0.508057465	-0.794970891	0.023842473	0.555132042	0.43197323	0.611662814	-0.595318735	1.993601218	0.003405752	1.460977052	-0.862182757	1.240815502	0.365586148	1.032943298
GRMZM2G088443	0.653262666	-1.351202935	0.146974467	0.037471962	1.240815502	-0.133217035	0.976525035	-0.83291742	0.636490883	1.318010897	1.501786817	1.545263217	2.998020796	-0.6448541	-0.954809756	0.098927729	0.133217035	0.51582268	0.758136008	0.687372812	-0.892205847	0.670220259	0.258273739	0.216235289	0.051108415	-0.258273739	-0.670220259	-1.032943298	-0.508057465	0.469675385	-0.91267586	-0.933535639	0.272384894	-1.669043821	0.365586148	0.882109877	0.547203211	0.492617885	0.500322766	-0.085246759	-1.757666049	1.184000049	-1.197842699	1.068431117	0.776421761	0.579132162	-0.037471962	-0.965610478	-0.804348643
GRMZM2G006429	0.965610478	-0.293654744	-0.057930049	0.785662535	-0.713488578	-0.933535639	0.272384894	-1.642224543	-2.645701413	-0.223213218	0.153863466	0.758136008	1.33442315	0.767246816	-0.704730028	0.372878156	-0.329407333	-0.402250065	0.051108415	-0.74010031	-1.757666049	-0.380190046	-1.790524917	0.098927729	0.133217035	-0.944119285	-1.021399468	-0.188425032	-0.678771572	1.270787244	0.7490877	0.469675385	0.195363108	0.731172307	0.678771572	1.105318189	1.301946185	0.064754379	0.181496015	1.130769373	-1.48107362	-1.422465003	0.279460686	0.722302208	1.368372038	0.74010031	0.555132042	0.409646587	0.105775004
GRMZM2G171507	-1.226239142	0.965610478	0.987557182	0.112627241	-0.713488578	1.286210621	-1.33442315	0.037471962	-2.645701413	0.126347925	-0.902393588	1.092857156	0.539308633	-0.402250065	-0.862182757	0.010217413	1.117953259	1.318010897	-1.211918765	0.244213829	0.09208509	-2.468001988	-1.270787244	0.030656506	0.209267873	0.531447525	-0.209267873	0.563095926	0.687372812	0.902393588	1.044626445	0.380190046	1.211918765	-1.460977052	1.068431117	0.492617885	-2.345104662	-2.249880663	-0.307908216	0.336607179	1.080563549	-0.133217035	0.315058297	-2.171527717	-0.872103029	1.422465003	-0.704730028	-0.603470624	1.009990169
GRMZM2G157536	1.862731867	0.611662814	1.501786817	-0.09208509	-0.251237576	0.202310601	-0.336607179	0.230202032	2.468001988	-0.531447525	0.010217413	-1.301946185	2.998020796	-0.944119285	1.105318189	-0.329407333	0.713488578	-0.882109877	-1.946202375	-1.48107362	-0.037471962	0.439462999	-0.767246816	1.48107362	-0.051108415	0.776421761	-0.365586148	-0.085246759	0.595318735	-0.469675385	-2.249880663	-0.057930049	-0.902393588	-0.358313528	-0.202310601	-1.105318189	-1.021399468	-0.998710851	-1.211918765	0.030656506	-1.240815502	-2.045954276	-0.044289159	-0.446977502	1.009990169	-0.417065588	-1.117953259	-0.571095686	-1.156974916
GRMZM2G173770	0.91267586	0.153863466	-0.954809756	-0.195363108	1.117953259	1.757666049	-0.112627241	0.785662535	-1.825439172	-0.380190046	-1.021399468	-0.424507616	-0.7490877	-0.209267873	0.619896262	-0.636490883	0.181496015	1.211918765	-1.156974916	2.468001988	1.156974916	0.030656506	-1.403975696	0.43197323	-0.188425032	1.240815502	0.636490883	-1.993601218	-0.394875486	-0.167663737	0.315058297	0.563095926	0.160759774	-0.944119285	0.126347925	1.697120332	1.368372038	-0.687372812	-1.143773961	0.051108415	0.202310601	-0.587206217	-1.757666049	-0.852346618	1.286210621	-0.293654744	-0.678771572	-0.003405752	0.09208509
GRMZM2G130953	0.872103029	1.946202375	1.211918765	-0.619896262	1.255660378	1.130769373	0.539308633	0.555132042	1.591873889	0.636490883	-0.153863466	0.195363108	2.998020796	0.358313528	-2.249880663	-0.987557182	1.545263217	0.987557182	-0.944119285	2.104600628	1.385954264	-0.653262666	0.661717677	-0.098927729	0.484942137	-0.417065588	-0.286550499	0.933535639	0.133217035	0.174575701	-0.713488578	0.823319923	0.611662814	0.167663737	0.146974467	-0.365586148	-1.862731867	-0.279460686	0.307908216	-0.030656506	-0.998710851	-1.351202935	-0.579132162	-0.133217035	-0.842592259	1.422465003	-0.872103029	-1.226239142	1.044626445
GRMZM2G003002	0.804348643	0.140092436	1.993601218	-0.531447525	-1.240815502	1.726602201	0.933535639	-0.687372812	0.785662535	0.037471962	-0.563095926	-0.085246759	1.197842699	0.09208509	0.976525035	0.098927729	0.265322712	0.057930049	-1.422465003	-1.441453795	1.156974916	-0.619896262	0.394875486	1.130769373	1.697120332	0.153863466	-0.286550499	1.143773961	1.255660378	-0.571095686	-1.460977052	0.523619123	-0.477294855	-0.579132162	1.032943298	-1.143773961	-0.181496015	2.171527717	-0.43197323	0.579132162	-2.249880663	-0.126347925	-0.023842473	-0.804348643	-0.785662535	0.133217035	-0.09208509	-0.547203211	-0.003405752
GRMZM2G132810	1.591873889	-0.785662535	-1.255660378	0.687372812	1.170380633	1.270787244	-0.329407333	0.119484771	-2.998020796	2.045954276	-0.547203211	0.563095926	-0.842592259	-0.670220259	-0.508057465	-0.307908216	1.946202375	0.484942137	-1.170380633	-0.037471962	0.91267586	0.417065588	-1.825439172	0.531447525	-0.343824517	-0.051108415	0.153863466	-1.862731867	-0.731172307	-1.33442315	-1.197842699	-0.244213829	-0.722302208	0.785662535	0.112627241	0.892205847	0.923055543	-0.563095926	-0.140092436	0.45451733	0.023842473	-0.892205847	-0.794970891	-1.286210621	-1.092857156	-0.636490883	-1.211918765	0.230202032	-0.010217413
GRMZM2G441089	-0.030656506	0.492617885	1.862731867	0.579132162	-0.153863466	0.146974467	0.6448541	-0.547203211	-1.568142731	-0.965610478	0.119484771	1.351202935	-0.237202109	-1.422465003	-0.307908216	-1.33442315	-0.402250065	-0.758136008	1.946202375	1.255660378	-1.130769373	-1.501786817	-0.976525035	-1.946202375	1.757666049	1.032943298	-0.133217035	-0.279460686	-1.403975696	1.993601218	-0.146974467	2.998020796	0.051108415	-0.244213829	-0.057930049	0.409646587	0.216235289	0.272384894	-2.249880663	0.43197323	-0.098927729	0.987557182	-0.595318735	-1.545263217	-0.636490883	0.555132042	0.251237576	-0.251237576	1.044626445
GRMZM2G403475	-0.030656506	1.021399468	0.636490883	0.823319923	-2.998020796	0.119484771	-0.023842473	-0.813797671	0.628171949	-2.645701413	1.523165155	0.687372812	1.156974916	0.078412413	-0.098927729	-2.468001988	2.045954276	0.696025208	-2.345104662	-0.492617885	-2.249880663	-0.603470624	0.539308633	1.946202375	1.009990169	-0.160759774	0.767246816	0.469675385	-2.171527717	-0.195363108	-2.104600628	0.965610478	-0.112627241	0.286550499	0.251237576	-0.579132162	-0.484942137	-0.402250065	0.010217413	-1.993601218	-0.661717677	-0.539308633	-1.946202375	-0.315058297	-0.140092436	-0.119484771	-1.902810954	-0.343824517	-1.862731867
GRMZM2G166032	0.523619123	-0.051108415	0.216235289	0.322224522	-0.91267586	-0.687372812	-0.469675385	-0.954809756	-2.045954276	-0.112627241	-0.987557182	0.409646587	-0.394875486	-0.862182757	0.064754379	0.057930049	-0.595318735	-1.902810954	0.882109877	-1.009990169	-1.080563549	-0.678771572	-0.484942137	0.713488578	-0.508057465	-1.993601218	-1.240815502	1.056453949	0.265322712	-0.417065588	0.272384894	0.153863466	0.003405752	-0.713488578	-0.563095926	0.258273739	0.998710851	-1.286210621	0.539308633	0.195363108	1.523165155	1.441453795	0.74010031	0.852346618	1.032943298	0.555132042	0.500322766	0.83291742	-0.446977502
GRMZM2G100286	2.104600628	-1.368372038	-0.539308633	1.009990169	1.48107362	0.336607179	-0.852346618	-0.500322766	-2.345104662	1.197842699	-0.731172307	1.591873889	0.126347925	-0.998710851	-1.080563549	0.216235289	1.825439172	1.368372038	-1.286210621	0.661717677	-0.209267873	0.813797671	-2.104600628	1.240815502	-0.380190046	-0.044289159	0.167663737	-1.523165155	0.017029548	-0.023842473	1.501786817	1.642224543	0.372878156	-0.078412413	0.439462999	-0.944119285	1.790524917	-0.687372812	-0.439462999	0.044289159	-0.722302208	-1.211918765	-1.697120332	0.037471962	0.160759774	0.424507616	-1.143773961	-0.244213829	-0.105775004
GRMZM2G701511	0.439462999	0.230202032	1.156974916	-2.998020796	0.446977502	-2.645701413	0.804348643	0.902393588	0.944119285	-0.078412413	0.030656506	-0.098927729	1.211918765	-0.329407333	0.547203211	0.555132042	-2.249880663	1.056453949	0.265322712	0.923055543	0.477294855	0.500322766	-2.171527717	-0.315058297	-2.104600628	1.318010897	0.713488578	1.642224543	0.862182757	1.270787244	1.143773961	1.351202935	1.422465003	0.469675385	0.462083086	1.226239142	1.790524917	0.628171949	-1.993601218	1.080563549	-1.946202375	-1.902810954	-1.862731867	-1.825439172	-0.119484771	0.45451733	-1.790524917	0.064754379	-0.307908216
GRMZM2G069389	0.119484771	0.804348643	0.336607179	-0.322224522	2.645701413	1.156974916	0.619896262	-0.146974467	2.998020796	0.202310601	0.133217035	0.51582268	0.387522319	0.6448541	-0.446977502	1.318010897	1.568142731	1.143773961	0.944119285	0.126347925	-0.365586148	0.923055543	-0.767246816	1.351202935	0.933535639	0.636490883	-1.156974916	-0.587206217	1.092857156	0.372878156	0.7490877	0.731172307	1.501786817	-0.872103029	1.422465003	0.531447525	-1.616536998	0.500322766	-0.776421761	0.892205847	-0.83291742	-0.892205847	-1.726602201	0.140092436	-0.902393588	-1.170380633	-0.713488578	-0.6448541	0.670220259
GRMZM2G444543	0.628171949	-0.402250065	-1.301946185	0.09208509	-0.539308633	1.105318189	0.174575701	0.230202032	-2.998020796	0.954809756	-0.767246816	0.365586148	-0.051108415	-0.872103029	-0.83291742	-1.255660378	2.468001988	1.143773961	-1.591873889	1.642224543	-0.696025208	-0.563095926	-1.825439172	0.181496015	0.336607179	-0.579132162	0.687372812	-0.209267873	0.902393588	-0.636490883	-0.365586148	-0.293654744	0.372878156	-0.409646587	0.153863466	0.223213218	1.385954264	-1.385954264	-0.188425032	-0.758136008	-0.167663737	-0.611662814	2.998020796	0.882109877	1.092857156	-0.892205847	0.126347925	0.446977502	-0.678771572
GRMZM2G076657	-0.998710851	0.181496015	1.48107362	-0.523619123	-0.244213829	1.993601218	0.563095926	0.272384894	-2.645701413	-0.380190046	-0.767246816	2.645701413	2.468001988	0.202310601	-1.460977052	0.153863466	1.255660378	0.83291742	-1.441453795	0.998710851	0.336607179	0.265322712	-1.697120332	-0.43197323	0.804348643	-0.329407333	0.030656506	-0.160759774	-0.195363108	0.587206217	0.923055543	1.156974916	0.872103029	-0.987557182	-0.872103029	0.380190046	0.611662814	-0.944119285	0.555132042	0.343824517	-1.757666049	-0.45451733	-0.976525035	-1.501786817	0.037471962	1.368372038	-1.33442315	-0.492617885	-0.057930049
GRMZM2G383735	0.153863466	-0.492617885	-0.587206217	0.523619123	0.944119285	1.403975696	0.160759774	-0.882109877	0.439462999	-0.181496015	-0.300773842	-2.645701413	-0.307908216	0.696025208	-0.223213218	0.174575701	2.998020796	2.645701413	1.270787244	1.757666049	0.508057465	-0.872103029	-0.469675385	0.872103029	1.184000049	0.892205847	0.105775004	0.794970891	2.045954276	0.603470624	1.790524917	1.301946185	0.293654744	1.669043821	0.547203211	1.197842699	-0.237202109	-2.171527717	-0.500322766	-0.078412413	-2.104600628	-0.35105981	2.249880663	0.071581727	-0.653262666	-2.045954276	0.030656506	-1.993601218	-1.946202375
GRMZM2G358667	0.731172307	-0.35105981	0.126347925	-0.010217413	-2.998020796	0.195363108	-0.140092436	0.272384894	-2.645701413	0.45451733	-0.500322766	-0.446977502	-0.279460686	-0.563095926	-0.417065588	-2.468001988	0.216235289	-0.372878156	0.181496015	0.071581727	0.785662535	0.813797671	-2.345104662	0.636490883	0.902393588	-0.611662814	-0.258273739	-0.402250065	-2.249880663	-0.508057465	-2.171527717	-0.380190046	0.105775004	1.385954264	-1.946202375	-1.902810954	1.032943298	0.251237576	-0.603470624	0.358313528	0.571095686	-0.523619123	-1.862731867	-0.057930049	-1.825439172	-1.790524917	-1.757666049	0.446977502	1.523165155
GRMZM2G004377	1.156974916	1.790524917	0.071581727	-0.872103029	-0.209267873	-0.603470624	-0.010217413	0.223213218	-1.825439172	1.255660378	-1.501786817	1.993601218	0.965610478	-0.91267586	-0.776421761	-0.902393588	-0.469675385	-0.044289159	-1.068431117	0.882109877	-0.251237576	-0.882109877	-0.539308633	-0.823319923	1.301946185	-0.51582268	-0.322224522	1.105318189	0.944119285	2.468001988	-0.293654744	0.439462999	1.032943298	-0.767246816	0.329407333	0.83291742	-1.184000049	0.167663737	0.258273739	1.184000049	-2.104600628	-0.508057465	-1.757666049	-2.171527717	0.954809756	0.010217413	0.74010031	1.130769373	1.068431117
GRMZM2G439860	1.669043821	-1.021399468	-0.202310601	0.112627241	0.852346618	0.45451733	0.571095686	-0.387522319	1.197842699	-0.409646587	-1.301946185	0.167663737	-0.571095686	1.156974916	0.195363108	-0.037471962	1.105318189	-0.579132162	0.030656506	2.171527717	0.83291742	-1.197842699	-0.842592259	0.409646587	1.616536998	0.508057465	-0.83291742	1.318010897	1.117953259	-0.603470624	-2.998020796	0.547203211	0.380190046	-0.195363108	-0.731172307	-0.687372812	-0.636490883	-0.998710851	-0.892205847	0.882109877	-0.336607179	0.037471962	-1.156974916	-1.117953259	-0.508057465	-0.105775004	-2.468001988	-0.279460686	0.976525035
GRMZM5G888502	0.571095686	0.603470624	-0.051108415	1.726602201	-2.998020796	-0.439462999	0.862182757	-0.531447525	0.439462999	0.722302208	1.255660378	0.923055543	0.842592259	-0.160759774	0.713488578	1.946202375	-0.722302208	0.017029548	1.197842699	0.023842473	-2.468001988	-0.105775004	0.409646587	0.010217413	0.286550499	1.403975696	0.030656506	-0.508057465	-2.345104662	-2.249880663	-0.636490883	-0.409646587	0.051108415	0.402250065	1.862731867	-0.670220259	0.595318735	-2.104600628	0.987557182	0.91267586	-0.484942137	0.462083086	-2.045954276	-1.993601218	-0.078412413	0.758136008	0.539308633	1.501786817	-0.611662814
GRMZM2G011588	-0.923055543	0.619896262	0.944119285	-0.477294855	-0.678771572	-0.078412413	0.237202109	-0.696025208	-2.998020796	-0.230202032	-1.255660378	2.645701413	2.345104662	-0.500322766	-1.642224543	-0.251237576	0.539308633	-0.167663737	-0.45451733	0.722302208	1.351202935	-0.244213829	-0.508057465	-0.484942137	0.424507616	-0.188425032	-0.237202109	-0.43197323	-0.223213218	-0.767246816	0.133217035	0.017029548	0.492617885	-1.056453949	-0.35105981	0.595318735	-0.343824517	-0.358313528	1.422465003	0.842592259	-0.902393588	1.790524917	-1.669043821	-1.591873889	0.286550499	1.255660378	-0.965610478	-0.195363108	0.336607179
GRMZM2G045241	-0.595318735	0.83291742	-1.143773961	1.270787244	0.237202109	-0.804348643	0.892205847	-0.6448541	-2.645701413	0.670220259	-1.523165155	1.170380633	2.171527717	-1.170380633	-1.757666049	-0.446977502	-0.322224522	0.713488578	-0.813797671	0.272384894	0.785662535	0.153863466	-2.171527717	-1.117953259	0.216235289	-0.91267586	-0.678771572	0.933535639	0.965610478	1.790524917	1.240815502	-0.83291742	1.545263217	-0.272384894	-0.202310601	1.032943298	-0.181496015	1.117953259	1.156974916	0.571095686	0.09208509	0.6448541	1.48107362	0.329407333	0.146974467	1.255660378	1.286210621	1.211918765	1.460977052
GRMZM2G085236	1.902810954	-0.167663737	0.484942137	-0.563095926	0.439462999	0.51582268	-0.037471962	1.184000049	-1.351202935	0.167663737	-1.156974916	0.244213829	-0.293654744	-0.181496015	1.385954264	-1.056453949	1.130769373	1.170380633	-0.670220259	-0.653262666	-1.616536998	-0.202310601	0.628171949	0.336607179	1.545263217	-0.902393588	-0.539308633	-0.146974467	0.45451733	0.595318735	0.43197323	0.713488578	0.216235289	-2.249880663	0.571095686	-0.003405752	0.343824517	-1.591873889	-1.726602201	-0.188425032	-0.998710851	-0.209267873	-0.244213829	0.202310601	2.998020796	-0.555132042	-2.998020796	-1.240815502	-0.279460686
GRMZM2G057475	2.045954276	0.126347925	0.813797671	0.09208509	1.460977052	1.669043821	0.713488578	-1.021399468	0.785662535	1.068431117	0.417065588	1.790524917	1.351202935	0.153863466	0.336607179	0.469675385	1.170380633	1.33442315	0.998710851	0.322224522	-0.365586148	0.265322712	-0.767246816	1.697120332	-0.098927729	-0.258273739	-0.230202032	0.133217035	1.568142731	-1.301946185	-0.167663737	0.146974467	0.237202109	-1.092857156	-0.882109877	0.003405752	-0.279460686	0.071581727	-0.023842473	1.117953259	-1.170380633	-0.51582268	-1.270787244	-1.255660378	-0.417065588	0.653262666	-0.785662535	-1.351202935	-0.424507616
GRMZM2G172829	-0.547203211	-0.09208509	-0.293654744	0.409646587	-1.351202935	-0.43197323	0.767246816	-0.976525035	-2.998020796	0.987557182	-0.74010031	1.184000049	-0.394875486	-1.044626445	-0.424507616	-1.092857156	-0.500322766	0.794970891	-0.902393588	0.862182757	1.351202935	-0.140092436	-1.993601218	-0.531447525	0.976525035	0.223213218	0.892205847	-0.636490883	-0.35105981	0.523619123	-0.823319923	0.653262666	1.032943298	-1.255660378	0.09208509	-0.687372812	0.030656506	1.726602201	0.722302208	1.080563549	-0.126347925	0.209267873	1.226239142	0.258273739	-0.492617885	0.439462999	-0.678771572	0.469675385	0.146974467
GRMZM2G112377	-2.998020796	0.216235289	0.188425032	-0.126347925	-2.645701413	-2.468001988	-0.300773842	-0.044289159	1.591873889	-2.249880663	-2.171527717	1.009990169	1.056453949	-0.244213829	-2.045954276	1.184000049	-1.993601218	0.279460686	-1.946202375	-1.902810954	-1.825439172	-1.790524917	1.156974916	-1.757666049	0.265322712	1.568142731	1.460977052	0.696025208	1.642224543	0.91267586	0.044289159	0.758136008	0.823319923	-1.697120332	0.842592259	1.143773961	-1.669043821	2.645701413	-0.315058297	2.171527717	-1.642224543	-1.616536998	-1.591873889	0.628171949	-1.568142731	-0.153863466	0.126347925	0.085246759	-1.545263217
GRMZM2G443776	1.568142731	-1.068431117	0.500322766	-0.030656506	0.251237576	-2.998020796	0.010217413	0.030656506	-0.477294855	-0.492617885	-0.279460686	-0.329407333	-0.722302208	-1.270787244	1.226239142	-0.892205847	0.372878156	-0.051108415	0.223213218	-0.687372812	0.237202109	-1.197842699	0.216235289	-0.010217413	-0.387522319	-0.7490877	0.146974467	1.545263217	0.133217035	0.603470624	0.394875486	0.713488578	0.823319923	-2.468001988	-1.156974916	0.785662535	0.098927729	1.068431117	0.704730028	0.872103029	-0.300773842	-0.133217035	-2.345104662	-0.563095926	0.188425032	0.965610478	-1.226239142	-0.230202032	-0.153863466
GRMZM2G178537	0.954809756	-0.500322766	-0.181496015	0.944119285	0.965610478	0.329407333	-0.336607179	0.462083086	-2.645701413	2.998020796	0.661717677	2.645701413	0.785662535	-1.044626445	-1.143773961	-0.477294855	-0.209267873	0.322224522	-1.080563549	0.678771572	0.45451733	0.976525035	-1.318010897	0.272384894	-0.372878156	-0.892205847	-0.670220259	-1.523165155	0.998710851	0.35105981	-0.322224522	-0.223213218	0.251237576	-0.265322712	0.402250065	1.403975696	-0.696025208	-0.153863466	1.33442315	-0.329407333	0.508057465	-0.531447525	-2.998020796	-1.616536998	0.704730028	0.595318735	-1.286210621	0.394875486	0.539308633
GRMZM2G164649	2.171527717	-0.085246759	0.293654744	-0.661717677	1.460977052	1.080563549	-0.687372812	1.669043821	-2.345104662	2.998020796	0.174575701	1.862731867	0.003405752	-0.037471962	1.616536998	1.130769373	0.469675385	0.409646587	0.531447525	1.143773961	1.48107362	-0.484942137	-2.249880663	0.265322712	0.071581727	0.244213829	-0.336607179	0.696025208	-0.365586148	-1.385954264	-0.477294855	-0.030656506	-0.51582268	-1.616536998	1.211918765	0.146974467	0.595318735	-0.902393588	-0.160759774	1.568142731	-0.167663737	-0.842592259	-0.272384894	-1.946202375	0.105775004	-0.181496015	0.424507616	-1.211918765	-0.813797671
GRMZM2G128986	0.539308633	-0.010217413	-0.539308633	0.722302208	0.611662814	-0.307908216	-0.209267873	0.563095926	2.645701413	-0.628171949	0.595318735	-0.563095926	-0.670220259	0.424507616	0.713488578	-0.343824517	0.188425032	-0.044289159	0.477294855	-1.902810954	-1.211918765	-0.358313528	1.117953259	0.071581727	-0.595318735	0.112627241	-0.492617885	0.547203211	-1.044626445	-0.202310601	-0.365586148	-0.523619123	0.051108415	-1.523165155	-0.424507616	-0.023842473	-1.946202375	0.307908216	1.523165155	-0.35105981	-0.119484771	1.403975696	1.286210621	0.469675385	0.923055543	-0.272384894	0.43197323	-0.293654744	-0.188425032
GRMZM2G082318	-0.767246816	-0.251237576	1.286210621	0.037471962	-0.45451733	0.237202109	-0.687372812	-0.976525035	-0.954809756	0.209267873	-2.171527717	-0.462083086	2.104600628	-0.653262666	-1.301946185	-1.790524917	1.240815502	-0.098927729	-0.343824517	-0.188425032	0.704730028	1.270787244	1.044626445	-0.571095686	0.146974467	-0.852346618	-0.6448541	0.842592259	1.33442315	-1.351202935	-0.823319923	0.202310601	-0.484942137	-1.211918765	0.085246759	-0.531447525	-0.804348643	-0.402250065	1.021399468	1.184000049	-1.48107362	0.636490883	-1.616536998	-2.468001988	2.249880663	0.531447525	0.547203211	0.523619123	0.417065588
GRMZM2G003692	1.130769373	0.195363108	-0.823319923	1.009990169	0.987557182	0.216235289	-0.603470624	-0.446977502	-2.998020796	0.462083086	1.170380633	2.998020796	1.460977052	-0.293654744	0.365586148	0.74010031	0.43197323	-0.085246759	1.318010897	-0.167663737	-1.422465003	0.279460686	-1.902810954	0.477294855	0.146974467	-1.080563549	0.181496015	-0.477294855	0.230202032	1.403975696	1.902810954	-0.160759774	0.603470624	-1.197842699	0.09208509	0.794970891	-0.237202109	-0.43197323	0.587206217	0.923055543	-1.318010897	-0.653262666	-0.071581727	-0.892205847	-0.51582268	1.523165155	-0.722302208	-0.380190046	-0.272384894
GRMZM2G074761	0.181496015	2.104600628	-2.998020796	0.126347925	0.195363108	1.184000049	-0.064754379	-2.645701413	2.998020796	0.133217035	-2.345104662	0.892205847	0.628171949	-0.030656506	-2.249880663	-2.171527717	0.307908216	0.223213218	1.697120332	0.51582268	0.785662535	-0.265322712	0.902393588	0.402250065	-2.045954276	0.492617885	0.112627241	-1.993601218	2.468001988	0.446977502	-1.946202375	-1.902810954	1.403975696	-1.825439172	-0.160759774	-1.790524917	-1.757666049	0.35105981	1.825439172	0.6448541	0.160759774	0.030656506	-1.697120332	0.286550499	-0.223213218	-1.669043821	1.568142731	0.409646587	1.056453949
GRMZM2G030744	0.293654744	-0.785662535	0.051108415	-0.965610478	0.902393588	0.223213218	0.653262666	0.003405752	0.195363108	-0.017029548	-0.023842473	1.068431117	1.757666049	-0.174575701	-1.301946185	-1.757666049	-0.133217035	-0.160759774	1.092857156	-0.358313528	-0.678771572	-0.758136008	0.017029548	-0.030656506	0.153863466	0.555132042	0.160759774	-0.804348643	0.842592259	-1.545263217	-0.469675385	0.571095686	1.33442315	-0.944119285	-0.343824517	-0.91267586	-0.446977502	0.83291742	-0.713488578	-0.098927729	-0.078412413	2.045954276	-1.726602201	-2.998020796	0.181496015	0.704730028	-1.523165155	-0.531447525	0.678771572
GRMZM2G043119	-0.477294855	0.83291742	-0.776421761	-0.307908216	0.160759774	0.409646587	0.126347925	-0.003405752	1.422465003	0.687372812	-1.790524917	-2.171527717	0.279460686	0.336607179	-0.862182757	0.380190046	-0.174575701	-1.080563549	1.240815502	0.09208509	-1.697120332	-0.531447525	0.469675385	-0.842592259	0.563095926	-0.91267586	-0.446977502	0.300773842	0.112627241	0.902393588	0.636490883	0.071581727	0.43197323	0.944119285	-0.237202109	0.704730028	1.009990169	0.293654744	1.117953259	1.460977052	-0.153863466	-0.872103029	0.852346618	0.030656506	0.146974467	2.104600628	0.085246759	-1.523165155	0.462083086
GRMZM2G119168	0.216235289	1.642224543	-0.044289159	-1.368372038	-0.244213829	-0.619896262	0.923055543	-1.441453795	2.468001988	-0.195363108	-1.318010897	0.044289159	2.998020796	-0.037471962	-0.704730028	-0.6448541	-0.030656506	0.230202032	-0.976525035	-0.293654744	-0.409646587	-0.83291742	-0.823319923	-0.872103029	0.842592259	-0.098927729	-0.003405752	1.545263217	0.322224522	0.794970891	-2.104600628	0.209267873	0.636490883	-1.021399468	0.439462999	-0.071581727	-1.105318189	1.068431117	0.91267586	0.603470624	-1.616536998	-0.017029548	0.539308633	0.119484771	0.882109877	-0.402250065	-1.501786817	-0.126347925	0.372878156
GRMZM2G055567	-0.713488578	-0.439462999	-0.547203211	-1.351202935	0.230202032	0.307908216	0.892205847	-0.722302208	-1.669043821	1.591873889	-0.872103029	0.315058297	-0.508057465	-0.579132162	-1.697120332	-0.209267873	0.105775004	1.403975696	-2.468001988	0.758136008	0.300773842	-1.902810954	-1.825439172	-1.385954264	1.697120332	-1.240815502	-0.696025208	1.032943298	0.872103029	0.976525035	1.117953259	0.098927729	1.156974916	-0.462083086	1.009990169	0.43197323	0.7490877	0.882109877	0.343824517	-0.595318735	0.439462999	-0.603470624	1.226239142	1.130769373	0.469675385	-0.140092436	-0.661717677	0.696025208	-0.804348643
GRMZM2G328795	-1.021399468	-0.446977502	-0.823319923	0.279460686	0.358313528	0.030656506	0.872103029	-0.547203211	-0.74010031	0.704730028	1.130769373	2.104600628	1.993601218	-0.365586148	-1.441453795	-0.804348643	0.343824517	-0.776421761	-1.902810954	-0.944119285	0.365586148	0.500322766	0.387522319	1.422465003	0.852346618	0.462083086	-1.156974916	-0.731172307	0.315058297	-0.636490883	-0.244213829	-0.146974467	-0.188425032	-0.722302208	-0.469675385	1.143773961	-0.6448541	-0.336607179	-1.117953259	1.021399468	-0.044289159	0.119484771	-2.998020796	0.202310601	0.037471962	-0.587206217	-0.852346618	-0.492617885	-0.030656506
GRMZM2G043893	1.032943298	1.197842699	0.74010031	0.587206217	-1.825439172	-0.146974467	0.571095686	-0.758136008	1.726602201	-1.545263217	-0.315058297	1.286210621	0.417065588	-0.587206217	0.794970891	-1.301946185	1.669043821	0.713488578	-0.244213829	1.403975696	0.965610478	-0.105775004	0.595318735	1.422465003	-0.731172307	0.628171949	-0.300773842	-0.603470624	1.240815502	2.171527717	0.358313528	0.492617885	-1.697120332	-1.568142731	-0.767246816	-0.713488578	-0.523619123	-0.023842473	-0.670220259	0.037471962	-1.790524917	-0.223213218	-0.823319923	-0.611662814	-0.057930049	-0.944119285	-2.345104662	-0.469675385	-0.923055543
GRMZM2G042107	-0.6448541	0.439462999	0.976525035	0.409646587	0.343824517	-0.804348643	0.45451733	-0.83291742	1.545263217	-1.568142731	-2.468001988	-0.687372812	1.669043821	-0.539308633	-0.944119285	0.336607179	-0.7490877	0.653262666	0.244213829	0.954809756	-1.726602201	-2.104600628	0.372878156	-1.385954264	0.119484771	-0.43197323	-0.531447525	1.523165155	-0.636490883	0.813797671	0.279460686	-0.230202032	0.105775004	-1.616536998	-0.365586148	0.286550499	-1.080563549	0.153863466	0.188425032	1.902810954	-0.555132042	2.345104662	0.571095686	1.825439172	2.171527717	-0.523619123	-1.068431117	0.462083086	-0.619896262
GRMZM2G165778	0.813797671	-0.329407333	-0.862182757	0.023842473	0.722302208	1.441453795	1.726602201	1.056453949	-2.345104662	-0.112627241	0.017029548	0.83291742	-0.603470624	0.293654744	-0.785662535	-0.619896262	1.697120332	0.74010031	-1.642224543	2.045954276	-0.653262666	-0.167663737	-1.422465003	0.563095926	0.713488578	0.417065588	-0.057930049	-1.545263217	-0.202310601	-0.636490883	0.91267586	0.785662535	-0.547203211	-1.286210621	-0.579132162	2.645701413	0.237202109	0.010217413	-0.713488578	0.892205847	-1.105318189	-0.563095926	1.825439172	0.696025208	0.758136008	0.358313528	-0.315058297	-1.255660378	0.153863466
GRMZM2G475059	1.211918765	-0.776421761	-0.023842473	0.696025208	1.301946185	-0.105775004	0.687372812	0.523619123	2.345104662	1.009990169	-0.852346618	1.441453795	-0.140092436	-0.336607179	-1.226239142	-1.862731867	0.462083086	-0.146974467	-1.255660378	-0.010217413	0.372878156	-0.057930049	0.842592259	0.611662814	1.092857156	0.704730028	-0.044289159	2.249880663	-0.500322766	-0.085246759	-0.307908216	-0.223213218	-0.167663737	0.776421761	-0.064754379	-0.133217035	-0.767246816	1.385954264	-1.170380633	1.726602201	-2.045954276	-0.804348643	1.080563549	1.130769373	1.669043821	1.021399468	0.402250065	0.315058297	1.902810954
GRMZM2G112210	1.642224543	-0.722302208	-1.286210621	0.265322712	-0.469675385	0.51582268	-0.587206217	2.468001988	-0.492617885	-1.48107362	0.539308633	-0.7490877	-0.477294855	-0.017029548	-0.653262666	-1.403975696	1.211918765	-0.670220259	0.167663737	0.852346618	-2.645701413	-0.595318735	0.202310601	-0.731172307	0.272384894	-0.057930049	-0.09208509	-0.91267586	0.223213218	-0.758136008	-0.272384894	-1.318010897	-1.170380633	2.249880663	0.603470624	0.595318735	-0.794970891	-0.923055543	-2.345104662	1.697120332	0.35105981	-0.209267873	-0.628171949	-0.872103029	-0.51582268	-0.286550499	-0.611662814	1.080563549	1.501786817
GRMZM2G042047	-0.555132042	0.628171949	0.315058297	-0.003405752	0.279460686	-0.571095686	0.35105981	-1.726602201	2.045954276	-0.230202032	-0.315058297	1.946202375	2.345104662	-1.056453949	-0.767246816	-0.954809756	-0.731172307	-0.462083086	0.484942137	-0.394875486	-1.697120332	-1.669043821	0.976525035	-0.484942137	1.080563549	-1.757666049	-1.130769373	1.993601218	0.83291742	1.117953259	0.358313528	-0.105775004	0.43197323	-1.351202935	-0.160759774	-0.417065588	-0.813797671	1.616536998	0.954809756	1.021399468	-1.790524917	0.51582268	1.862731867	1.211918765	0.965610478	0.713488578	0.188425032	-0.017029548	0.216235289
GRMZM2G128658	0.678771572	-0.286550499	0.279460686	-0.722302208	-1.790524917	0.767246816	0.965610478	1.184000049	0.003405752	-1.545263217	-1.616536998	-0.402250065	-0.670220259	0.687372812	-0.057930049	-0.167663737	0.508057465	-0.209267873	-1.669043821	0.140092436	-2.345104662	-0.923055543	-0.804348643	-1.143773961	0.188425032	-1.170380633	-0.628171949	0.731172307	-0.098927729	-0.785662535	0.563095926	0.45451733	-0.010217413	-1.044626445	0.315058297	-0.35105981	0.823319923	-0.547203211	-1.568142731	-0.539308633	0.539308633	0.322224522	-0.085246759	-0.372878156	0.293654744	0.892205847	-0.83291742	0.882109877	1.226239142
GRMZM2G053397	1.240815502	-0.653262666	0.209267873	0.976525035	0.923055543	1.197842699	0.587206217	-1.255660378	-1.697120332	-1.170380633	-0.085246759	-0.965610478	-1.726602201	0.892205847	-0.794970891	-1.757666049	0.469675385	0.628171949	-0.153863466	1.068431117	-0.293654744	0.265322712	-1.351202935	0.446977502	0.202310601	0.83291742	-0.469675385	-0.842592259	-0.51582268	-1.105318189	0.064754379	-0.258273739	-0.636490883	-0.722302208	0.112627241	0.731172307	-1.044626445	0.279460686	-2.468001988	1.862731867	-0.167663737	-1.156974916	-1.368372038	-0.892205847	-0.160759774	0.508057465	-0.044289159	-0.547203211	-0.037471962
GRMZM2G048403	2.998020796	-0.017029548	1.143773961	1.156974916	1.170380633	-0.785662535	-0.237202109	-0.794970891	0.343824517	1.385954264	1.197842699	1.403975696	0.804348643	0.51582268	1.48107362	0.531447525	0.83291742	1.318010897	0.43197323	-1.117953259	-1.021399468	1.009990169	-1.441453795	1.092857156	0.758136008	0.923055543	0.098927729	-0.402250065	-1.286210621	-0.372878156	-1.422465003	-0.057930049	-1.270787244	1.441453795	0.508057465	0.071581727	0.998710851	-0.119484771	-0.010217413	1.044626445	-0.140092436	0.329407333	0.030656506	-1.902810954	0.112627241	-0.469675385	-1.403975696	-0.209267873	-0.804348643
GRMZM2G097395	1.021399468	0.017029548	0.051108415	-0.424507616	-0.003405752	-0.687372812	0.167663737	-0.293654744	-2.045954276	-0.45451733	0.146974467	0.823319923	-0.531447525	-0.167663737	-0.140092436	1.591873889	-0.882109877	-0.343824517	-0.258273739	0.126347925	-2.249880663	-0.731172307	1.385954264	0.140092436	-0.126347925	-2.104600628	-0.661717677	0.085246759	1.825439172	0.098927729	0.492617885	0.862182757	0.976525035	-0.987557182	-0.653262666	0.587206217	-0.74010031	-0.944119285	-2.171527717	0.477294855	-1.669043821	-0.954809756	-0.722302208	-0.508057465	0.45451733	0.307908216	-0.603470624	0.105775004	0.965610478
GRMZM2G377761	1.545263217	-0.813797671	-0.670220259	1.130769373	0.7490877	1.993601218	-0.230202032	0.258273739	-2.468001988	0.892205847	-0.380190046	0.794970891	-0.112627241	-0.587206217	0.372878156	0.523619123	0.902393588	0.133217035	-2.249880663	-0.017029548	-0.209267873	1.009990169	-1.351202935	-0.244213829	-0.387522319	-0.767246816	0.417065588	-1.501786817	1.021399468	-0.492617885	0.265322712	1.117953259	0.731172307	-0.794970891	0.078412413	1.184000049	1.48107362	-0.417065588	-1.117953259	1.669043821	0.017029548	0.237202109	-1.286210621	-1.143773961	-0.258273739	0.965610478	-0.7490877	-0.976525035	-0.119484771
GRMZM2G129288	-1.032943298	0.661717677	-0.244213829	-0.713488578	0.146974467	0.636490883	0.91267586	-0.030656506	2.249880663	-0.653262666	-0.547203211	-0.402250065	0.300773842	0.315058297	0.133217035	-0.119484771	-0.417065588	0.902393588	-2.345104662	0.804348643	-0.91267586	0.216235289	0.722302208	-1.156974916	2.104600628	-0.146974467	-0.174575701	1.642224543	0.523619123	0.954809756	0.372878156	-0.424507616	-0.579132162	-1.460977052	0.731172307	0.45451733	-0.265322712	1.068431117	0.687372812	1.385954264	-0.678771572	0.653262666	-0.462083086	-0.785662535	0.892205847	0.696025208	-0.794970891	-1.33442315	-0.852346618
GRMZM2G155329	1.441453795	-0.098927729	0.6448541	0.611662814	1.642224543	-0.882109877	-0.579132162	-1.642224543	2.998020796	0.587206217	1.460977052	0.380190046	1.385954264	-0.653262666	0.387522319	0.872103029	0.998710851	0.539308633	1.523165155	0.105775004	-0.713488578	0.402250065	1.669043821	-0.167663737	-0.037471962	0.188425032	0.713488578	-0.223213218	1.726602201	1.021399468	-1.501786817	0.91267586	0.619896262	-0.307908216	-0.402250065	-1.757666049	-0.174575701	1.993601218	0.343824517	0.462083086	-1.368372038	0.336607179	-0.237202109	0.09208509	-0.804348643	1.009990169	-1.197842699	-1.790524917	1.092857156
GRMZM2G046529	1.757666049	1.009990169	0.223213218	-1.044626445	-0.794970891	-1.068431117	-0.181496015	0.6448541	1.301946185	0.882109877	-1.385954264	-0.595318735	1.946202375	0.523619123	-0.112627241	-0.687372812	-0.767246816	0.126347925	0.258273739	-0.892205847	0.579132162	0.508057465	0.358313528	0.91267586	-0.51582268	0.372878156	0.976525035	0.394875486	0.279460686	0.687372812	0.365586148	-0.523619123	0.619896262	-0.272384894	0.933535639	-2.468001988	1.726602201	0.003405752	0.300773842	0.140092436	-1.009990169	-0.965610478	-0.35105981	-0.293654744	-0.188425032	-0.251237576	-0.628171949	-0.74010031	0.195363108
GRMZM2G004180	2.998020796	0.500322766	0.965610478	-0.181496015	0.417065588	1.669043821	0.017029548	-0.696025208	1.757666049	-0.611662814	0.776421761	0.469675385	1.080563549	1.301946185	-0.704730028	-1.757666049	2.468001988	-0.446977502	0.394875486	-0.417065588	-0.902393588	-0.023842473	0.462083086	2.249880663	-0.563095926	0.300773842	0.74010031	0.365586148	-1.130769373	-0.91267586	-1.184000049	-0.523619123	-0.119484771	-0.722302208	-0.508057465	-0.112627241	-1.993601218	-0.329407333	-0.678771572	0.358313528	-1.368372038	-0.571095686	-1.068431117	-0.804348643	-0.852346618	-0.071581727	0.003405752	1.044626445	0.126347925
GRMZM2G103945	-0.071581727	-0.044289159	2.249880663	0.051108415	0.704730028	-0.181496015	1.009990169	-1.270787244	0.237202109	-0.279460686	0.372878156	1.726602201	2.645701413	-1.757666049	-0.965610478	-0.017029548	-0.902393588	0.965610478	0.987557182	-0.571095686	0.523619123	0.579132162	-0.153863466	0.446977502	0.531447525	0.064754379	-0.587206217	0.687372812	-0.74010031	0.571095686	-0.6448541	0.017029548	0.098927729	-0.188425032	-0.776421761	-1.080563549	-0.976525035	0.140092436	-0.500322766	-0.563095926	-2.998020796	-0.336607179	0.785662535	0.508057465	-0.372878156	0.174575701	-1.946202375	-0.595318735	1.501786817
GRMZM2G367638	-0.35105981	-0.7490877	1.117953259	-0.195363108	0.555132042	-0.794970891	1.642224543	1.946202375	2.468001988	-2.998020796	1.170380633	-0.300773842	-0.105775004	0.976525035	-2.645701413	-0.057930049	-1.009990169	-0.74010031	0.030656506	-1.143773961	-0.547203211	0.372878156	-0.446977502	0.071581727	0.731172307	1.197842699	-0.785662535	1.068431117	-2.468001988	-0.023842473	-0.500322766	-0.823319923	0.322224522	0.785662535	0.307908216	-0.322224522	-2.345104662	0.133217035	-0.223213218	-0.531447525	0.051108415	1.301946185	-2.249880663	-2.171527717	-0.380190046	-0.237202109	-0.678771572	0.160759774	-1.255660378
AC213463.3_FG009	0.7490877	-0.563095926	1.591873889	0.365586148	-0.300773842	0.286550499	1.993601218	0.547203211	2.468001988	-0.230202032	0.112627241	0.119484771	-0.852346618	-1.368372038	-0.653262666	-0.678771572	-0.307908216	-0.265322712	-1.255660378	-0.45451733	-0.611662814	-2.045954276	0.258273739	-0.417065588	0.126347925	1.056453949	-0.195363108	0.687372812	0.140092436	-0.160759774	0.923055543	0.057930049	-1.226239142	-2.468001988	0.424507616	0.051108415	0.195363108	0.329407333	1.211918765	0.944119285	-1.092857156	-0.987557182	-0.687372812	-1.385954264	-0.402250065	0.628171949	-2.171527717	-0.954809756	1.862731867
GRMZM2G014356	1.862731867	-2.998020796	-0.492617885	-0.216235289	0.696025208	0.209267873	-0.258273739	-0.35105981	2.468001988	-0.085246759	0.098927729	0.987557182	-1.697120332	-0.078412413	-0.307908216	-0.023842473	0.595318735	0.017029548	-0.636490883	1.156974916	-0.758136008	-0.555132042	0.265322712	-0.394875486	0.279460686	-0.6448541	-0.329407333	0.500322766	0.547203211	-1.143773961	0.678771572	0.767246816	0.153863466	1.056453949	-0.933535639	1.301946185	0.003405752	-1.184000049	-1.056453949	0.804348643	-0.126347925	-0.954809756	-2.645701413	-0.892205847	-0.265322712	0.126347925	-0.174575701	0.571095686	0.539308633
GRMZM2G111225	0.611662814	1.032943298	-1.286210621	0.7490877	1.48107362	1.117953259	0.563095926	0.492617885	-0.133217035	-1.862731867	0.508057465	0.767246816	0.713488578	1.501786817	-1.757666049	-2.998020796	0.244213829	-1.33442315	0.923055543	-1.226239142	-0.439462999	0.223213218	1.697120332	-0.071581727	0.09208509	0.146974467	-0.409646587	0.064754379	1.156974916	-0.223213218	0.424507616	-0.372878156	0.372878156	-2.345104662	-2.171527717	-0.965610478	-0.030656506	1.286210621	0.023842473	-0.767246816	-0.653262666	-1.056453949	0.785662535	0.358313528	0.670220259	0.279460686	0.965610478	0.044289159	0.804348643
GRMZM2G086876	0.133217035	0.539308633	0.571095686	-0.794970891	0.223213218	-0.071581727	-0.45451733	-1.032943298	1.642224543	0.071581727	-0.976525035	1.460977052	1.993601218	-1.270787244	-1.184000049	-0.83291742	0.51582268	0.882109877	-1.33442315	-0.085246759	0.902393588	-0.722302208	-0.078412413	-0.35105981	0.387522319	-0.508057465	-0.402250065	0.944119285	0.872103029	0.45451733	-0.030656506	-1.080563549	-0.469675385	-1.669043821	0.965610478	-0.140092436	0.085246759	-1.568142731	0.195363108	-0.202310601	-1.726602201	-0.852346618	-0.619896262	-0.336607179	1.862731867	-0.462083086	-0.477294855	0.531447525	0.188425032
GRMZM2G165173	0.462083086	-0.181496015	0.776421761	-0.112627241	1.642224543	-0.146974467	-0.017029548	-2.998020796	-2.468001988	-0.469675385	-0.678771572	0.965610478	-0.098927729	-0.372878156	-0.619896262	0.45451733	0.188425032	-0.023842473	-0.987557182	-0.293654744	0.852346618	-0.409646587	-1.117953259	0.785662535	-2.249880663	0.286550499	-1.368372038	-0.902393588	-2.171527717	-1.385954264	-2.104600628	-0.153863466	0.611662814	1.044626445	0.272384894	0.446977502	1.545263217	0.279460686	0.105775004	0.09208509	-0.402250065	0.902393588	-0.003405752	0.587206217	-0.776421761	-0.35105981	0.862182757	0.293654744	-1.286210621
GRMZM2G121840	0.307908216	-1.044626445	0.003405752	1.301946185	1.368372038	-1.946202375	-1.117953259	-1.143773961	-1.790524917	-1.197842699	0.272384894	2.171527717	-1.226239142	0.343824517	-0.293654744	0.010217413	-0.146974467	-0.153863466	2.998020796	-0.892205847	0.057930049	-0.315058297	0.51582268	-0.167663737	-0.678771572	-1.255660378	-2.468001988	1.021399468	-1.545263217	0.776421761	0.704730028	-0.531447525	0.174575701	0.767246816	-0.209267873	-1.591873889	-0.998710851	1.068431117	0.547203211	0.417065588	-0.628171949	0.336607179	-0.462083086	-0.265322712	-1.156974916	0.902393588	-0.687372812	0.258273739	0.209267873
GRMZM2G163711	-2.998020796	-2.645701413	-2.468001988	-2.345104662	-2.249880663	2.249880663	-2.171527717	0.595318735	0.767246816	-2.045954276	-1.993601218	1.211918765	0.286550499	-1.902810954	-1.862731867	-1.825439172	0.619896262	-1.790524917	2.998020796	1.197842699	0.439462999	-1.757666049	0.085246759	-1.726602201	-1.697120332	0.628171949	-1.642224543	-1.616536998	-1.591873889	-1.568142731	1.351202935	-1.523165155	0.098927729	-1.501786817	-1.48107362	0.954809756	0.424507616	-1.460977052	0.017029548	0.555132042	0.91267586	-1.441453795	-1.422465003	-1.403975696	-1.385954264	0.823319923	1.460977052	-1.368372038	0.223213218
GRMZM2G340048	-0.133217035	0.713488578	-0.469675385	-0.842592259	-0.804348643	1.080563549	1.33442315	-0.272384894	-1.143773961	-0.322224522	-1.545263217	0.017029548	1.568142731	0.492617885	-0.057930049	-0.852346618	0.181496015	0.244213829	0.237202109	-2.645701413	0.300773842	-0.251237576	0.409646587	0.380190046	0.057930049	-0.140092436	0.153863466	1.092857156	-0.010217413	1.318010897	0.098927729	0.394875486	1.068431117	-0.209267873	-0.477294855	-0.595318735	0.424507616	-0.882109877	0.563095926	-0.105775004	-1.021399468	-1.044626445	-0.653262666	-1.726602201	-0.071581727	1.056453949	1.240815502	-0.439462999	2.645701413
GRMZM2G373738	-0.394875486	0.74010031	-0.965610478	-0.619896262	1.568142731	1.211918765	0.112627241	-0.380190046	-0.085246759	0.469675385	-0.307908216	0.603470624	0.272384894	-0.365586148	0.030656506	-0.603470624	1.105318189	0.998710851	-0.251237576	1.825439172	1.226239142	1.318010897	0.051108415	0.813797671	-0.653262666	-2.645701413	0.279460686	0.670220259	-0.133217035	0.126347925	1.009990169	-0.424507616	1.642224543	-2.468001988	-1.351202935	0.713488578	-0.987557182	-2.345104662	-0.944119285	0.767246816	2.171527717	1.080563549	1.143773961	0.965610478	-0.531447525	-0.140092436	-2.249880663	0.153863466	0.776421761
GRMZM2G095164	-0.010217413	0.119484771	0.160759774	1.523165155	1.056453949	-0.872103029	0.965610478	-0.661717677	1.946202375	0.83291742	-1.790524917	1.143773961	-0.064754379	-0.954809756	0.098927729	0.023842473	1.422465003	2.045954276	1.441453795	-1.642224543	-0.547203211	0.852346618	0.872103029	0.678771572	-1.460977052	-0.492617885	-0.336607179	-0.45451733	0.767246816	0.322224522	-0.35105981	0.017029548	1.33442315	0.202310601	-0.051108415	0.595318735	0.336607179	-0.315058297	0.051108415	0.140092436	-0.892205847	-0.023842473	-1.825439172	-0.6448541	-0.687372812	0.500322766	-1.255660378	-0.098927729	-0.409646587
GRMZM2G152732	-1.501786817	0.661717677	0.209267873	-0.842592259	-1.092857156	0.603470624	-0.133217035	-0.923055543	-2.645701413	-0.085246759	-1.616536998	-0.167663737	-0.462083086	0.387522319	-1.790524917	-1.545263217	0.064754379	-0.365586148	0.872103029	-0.446977502	1.117953259	-0.619896262	-2.171527717	-0.146974467	0.587206217	-0.35105981	-0.044289159	-0.010217413	0.842592259	-0.003405752	1.211918765	-0.195363108	0.555132042	0.500322766	0.126347925	0.758136008	-0.315058297	-0.174575701	1.403975696	-0.767246816	-0.892205847	-0.83291742	-0.023842473	-1.441453795	-0.976525035	-0.140092436	0.160759774	-0.372878156	1.757666049
GRMZM2G065896	-0.160759774	1.993601218	-0.713488578	0.209267873	0.619896262	-0.704730028	0.670220259	0.272384894	-1.946202375	1.523165155	0.078412413	0.776421761	0.923055543	0.044289159	-0.619896262	-0.09208509	-0.358313528	-0.678771572	-2.345104662	0.976525035	-0.933535639	0.595318735	-1.032943298	0.380190046	-1.726602201	-0.794970891	-0.126347925	-0.167663737	-1.056453949	0.965610478	0.010217413	0.394875486	0.195363108	-0.882109877	-0.307908216	1.080563549	-0.409646587	0.09208509	2.104600628	0.83291742	-0.587206217	-0.380190046	1.697120332	1.591873889	-0.687372812	0.484942137	-0.539308633	0.417065588	-0.508057465
[truncated: 248 more columns]
