# Supplementary material for: Verification of Three-Phase Dependency Analysis Bayesian Network Learning Method for Maize Carotenoid Gene Mining
Source: Biomed Res Int. 2017 Jul 30;2017:1813494. doi: 10.1155/2017/1813494 (PMC5554554; doi:10.1155/2017/1813494)
Supplement: Supplementary file 1 — The experiment data 1 of 109 nodes, the experiment data 2 of 109 nodes, and so on are shown here. [file 1813494.f1.zip › Supplementary material/Gene100_4.csv]

V1	V2	V3	V4	V5	V6	V7	V8	V9	V10	V11	V12	V13	V14	V15	V16	V17	V18	V19	V20	V21	V22	V23	V24	V25	V26	V27	V28	V29	V30	V31	V32	V33	V34	V35	V36	V37	V38	V39	V40	V41	V42	V43	V44	V45	V46	V47	V48	V49	V50
GRMZM5G882427	0.813797671	0.619896262	0.804348643	-1.403975696	-1.170380633	-0.653262666	0.611662814	0.492617885	1.545263217	0.064754379	0.112627241	-0.976525035	1.591873889	-0.044289159	1.301946185	-0.43197323	0.167663737	0.030656506	0.051108415	-0.704730028	-1.568142731	-1.105318189	0.023842473	-0.037471962	-1.021399468	0.661717677	0.462083086	-0.785662535	0.195363108	-1.009990169	-1.862731867	-1.351202935	-0.387522319	-0.998710851	-0.862182757	-0.372878156	0.237202109	2.045954276	0.987557182	1.318010897	-1.080563549	1.080563549	1.403975696	-0.439462999	0.358313528	-0.794970891	1.790524917	1.48107362	0.823319923
GRMZM2G366681	1.056453949	1.226239142	0.83291742	-0.446977502	-0.477294855	-0.611662814	0.439462999	0.279460686	0.477294855	0.813797671	0.023842473	0.329407333	1.993601218	0.523619123	-0.628171949	-1.318010897	0.251237576	0.696025208	0.713488578	-0.758136008	-0.09208509	-1.501786817	-0.74010031	1.009990169	0.037471962	-0.329407333	-0.003405752	0.579132162	0.140092436	0.071581727	-0.704730028	0.462083086	0.188425032	0.078412413	-0.998710851	0.804348643	-0.713488578	-1.825439172	1.460977052	1.032943298	-1.726602201	0.195363108	0.687372812	0.010217413	0.862182757	0.181496015	-0.954809756	0.987557182	-0.661717677
GRMZM2G114751	1.642224543	0.030656506	1.697120332	0.223213218	2.104600628	-0.678771572	0.842592259	0.071581727	2.998020796	0.105775004	-0.037471962	-1.523165155	2.645701413	-0.35105981	0.078412413	-0.531447525	0.010217413	0.044289159	1.568142731	-0.547203211	-2.645701413	0.209267873	1.501786817	1.726602201	-0.286550499	0.35105981	0.265322712	-0.010217413	-0.003405752	1.368372038	-0.153863466	1.286210621	0.336607179	-0.307908216	1.460977052	-0.767246816	1.156974916	1.130769373	1.318010897	1.862731867	-0.343824517	-0.477294855	-0.446977502	-1.044626445	-0.653262666	-0.387522319	-0.813797671	-0.83291742	-0.409646587
GRMZM2G322953	2.249880663	1.351202935	1.044626445	0.678771572	-0.037471962	0.484942137	-0.153863466	0.43197323	-1.616536998	-0.446977502	1.117953259	1.009990169	-0.823319923	1.270787244	0.424507616	0.45451733	0.140092436	-0.387522319	0.409646587	1.669043821	2.345104662	-0.181496015	0.547203211	1.790524917	0.085246759	0.842592259	0.329407333	0.462083086	0.394875486	-1.092857156	-0.842592259	-0.776421761	-0.804348643	0.181496015	0.531447525	1.460977052	-0.119484771	0.882109877	0.258273739	-0.126347925	-1.368372038	-0.09208509	-1.697120332	-1.669043821	0.071581727	-0.133217035	-0.105775004	0.146974467	0.804348643
GRMZM2G578572	0.343824517	-0.265322712	0.209267873	0.09208509	-0.140092436	1.790524917	-0.195363108	-0.417065588	-2.645701413	-0.119484771	-1.068431117	-0.477294855	-0.300773842	-0.51582268	-0.987557182	-0.258273739	0.670220259	1.642224543	-1.170380633	1.385954264	-1.130769373	0.153863466	-1.993601218	0.051108415	-0.112627241	-0.439462999	0.696025208	-1.270787244	-0.35105981	-0.387522319	0.804348643	1.056453949	-0.462083086	-1.226239142	0.202310601	1.184000049	0.300773842	-0.153863466	-0.670220259	0.394875486	0.223213218	-0.882109877	-0.902393588	-0.794970891	0.523619123	0.661717677	0.265322712	-0.804348643	0.174575701
GRMZM2G583644	-0.098927729	0.071581727	0.112627241	-2.998020796	1.422465003	0.51582268	-0.078412413	-2.645701413	-2.249880663	0.230202032	0.872103029	0.209267873	-2.171527717	0.358313528	-2.104600628	0.394875486	0.539308633	0.579132162	1.080563549	2.645701413	-1.993601218	1.255660378	-1.946202375	-1.902810954	0.813797671	0.923055543	0.417065588	-1.825439172	0.678771572	0.722302208	2.345104662	1.993601218	-0.085246759	-1.790524917	-1.757666049	1.669043821	0.105775004	0.611662814	-1.697120332	0.424507616	-1.669043821	-1.642224543	-1.616536998	0.387522319	-1.591873889	-1.568142731	-0.017029548	-1.545263217	0.842592259
GRMZM5G812289	1.009990169	0.446977502	0.336607179	2.045954276	1.669043821	1.790524917	-2.998020796	-2.645701413	-2.249880663	1.460977052	0.944119285	2.645701413	0.133217035	-2.104600628	0.265322712	1.044626445	-2.045954276	0.424507616	-1.993601218	0.661717677	-1.862731867	1.184000049	-1.825439172	2.171527717	1.545263217	-1.790524917	-1.726602201	-1.697120332	-1.669043821	-1.642224543	-1.616536998	0.409646587	0.017029548	-1.523165155	-1.501786817	0.003405752	0.696025208	-1.48107362	-1.460977052	0.823319923	-1.441453795	0.098927729	-1.422465003	-1.403975696	0.195363108	-1.385954264	-1.368372038	0.595318735	0.078412413
GRMZM2G166759	0.394875486	-0.051108415	-0.223213218	-0.628171949	0.085246759	-0.51582268	0.336607179	-1.422465003	-2.998020796	-0.265322712	-0.83291742	0.933535639	1.825439172	-0.636490883	-0.872103029	-0.678771572	-0.126347925	0.785662535	-1.545263217	0.45451733	-1.33442315	-0.862182757	0.571095686	-0.722302208	0.500322766	0.017029548	-0.057930049	0.611662814	-0.251237576	1.501786817	0.892205847	0.619896262	0.713488578	-2.345104662	0.758136008	-0.484942137	0.051108415	0.057930049	0.83291742	1.117953259	-1.441453795	0.91267586	2.045954276	1.591873889	0.653262666	0.804348643	-0.174575701	0.126347925	0.329407333
GRMZM2G104538	1.021399468	-0.619896262	-0.965610478	0.307908216	-0.286550499	-0.704730028	0.051108415	-0.119484771	1.240815502	1.226239142	1.669043821	1.616536998	-1.068431117	0.372878156	0.251237576	0.678771572	-1.385954264	-2.171527717	1.255660378	-0.174575701	-2.468001988	-0.469675385	1.170380633	0.670220259	-1.170380633	-2.104600628	-0.944119285	1.068431117	-0.071581727	0.402250065	0.45451733	-0.976525035	0.064754379	-2.645701413	-1.441453795	-0.417065588	-0.223213218	0.794970891	-0.300773842	0.539308633	-0.670220259	-0.272384894	1.946202375	-0.365586148	-0.767246816	0.954809756	-0.023842473	-2.045954276	-0.409646587
GRMZM5G825515	1.080563549	0.923055543	0.804348643	-0.923055543	0.462083086	1.032943298	-0.563095926	-0.492617885	2.645701413	0.484942137	1.368372038	-0.731172307	-0.587206217	-1.240815502	0.439462999	1.501786817	0.902393588	0.071581727	1.021399468	-0.508057465	-1.726602201	1.286210621	0.7490877	0.003405752	0.133217035	0.181496015	0.153863466	0.987557182	1.184000049	0.424507616	-0.010217413	0.329407333	0.251237576	-2.645701413	-0.023842473	-1.255660378	-1.946202375	-0.160759774	-1.130769373	0.563095926	-1.523165155	1.422465003	0.300773842	-1.616536998	-0.105775004	1.130769373	-1.591873889	-0.696025208	-0.882109877
GRMZM2G173209	0.776421761	0.547203211	0.133217035	-0.794970891	0.286550499	-0.181496015	-0.462083086	-1.523165155	-1.441453795	-0.998710851	0.051108415	-0.209267873	0.336607179	0.976525035	-0.329407333	-1.184000049	1.056453949	-0.417065588	-1.368372038	-0.315058297	-1.642224543	-0.882109877	0.387522319	-0.555132042	-0.713488578	-1.726602201	-0.153863466	0.446977502	0.892205847	0.484942137	1.616536998	-0.636490883	0.279460686	1.318010897	-0.279460686	0.003405752	-0.237202109	-0.293654744	-0.343824517	1.170380633	-0.365586148	-0.842592259	-1.669043821	-0.91267586	-0.678771572	1.460977052	0.794970891	0.017029548	0.713488578
GRMZM2G083095	1.757666049	-1.301946185	-0.358313528	0.188425032	0.587206217	0.653262666	0.372878156	-1.156974916	-2.645701413	1.117953259	-0.209267873	0.492617885	0.202310601	-0.286550499	-0.954809756	-0.611662814	2.468001988	0.380190046	0.237202109	0.678771572	-1.825439172	0.293654744	-2.104600628	0.223213218	0.83291742	-0.43197323	-0.35105981	0.628171949	0.071581727	0.687372812	1.642224543	1.862731867	1.021399468	-0.547203211	0.112627241	0.424507616	0.74010031	-0.439462999	-0.713488578	0.523619123	-1.441453795	-0.45451733	-1.021399468	-1.697120332	-0.372878156	-0.678771572	-1.270787244	-0.258273739	-0.74010031
GRMZM2G073912	-0.965610478	-0.037471962	-1.092857156	1.902810954	-0.251237576	-1.068431117	1.545263217	-0.696025208	-2.998020796	-0.023842473	-1.255660378	0.6448541	0.74010031	-0.402250065	-0.987557182	-1.757666049	-0.704730028	-0.439462999	-1.211918765	1.616536998	-0.365586148	-0.508057465	-1.422465003	-1.021399468	0.372878156	-0.167663737	-0.293654744	-1.286210621	-0.902393588	0.611662814	0.776421761	-0.45451733	-0.307908216	0.174575701	0.057930049	0.336607179	0.531447525	0.571095686	0.119484771	0.146974467	-0.286550499	0.587206217	0.563095926	0.653262666	0.767246816	0.358313528	-0.794970891	1.092857156	0.315058297
GRMZM2G037134	-0.387522319	0.628171949	0.45451733	-1.591873889	-0.713488578	0.037471962	0.098927729	-0.462083086	-0.923055543	-0.484942137	-1.993601218	-0.523619123	0.758136008	-0.017029548	-0.7490877	-1.460977052	0.976525035	0.293654744	-0.365586148	0.223213218	-1.669043821	-0.804348643	-0.933535639	-1.757666049	1.441453795	-1.523165155	-0.587206217	1.226239142	1.862731867	1.726602201	2.998020796	-0.119484771	0.417065588	-2.045954276	-0.477294855	1.044626445	-0.661717677	-1.068431117	1.545263217	0.216235289	-1.385954264	0.892205847	-0.030656506	0.160759774	0.078412413	-0.251237576	0.43197323	0.409646587	0.603470624
GRMZM2G032140	-2.998020796	0.023842473	-2.645701413	0.272384894	-2.468001988	0.35105981	0.944119285	1.009990169	0.174575701	1.286210621	-2.249880663	-2.171527717	2.249880663	0.112627241	0.579132162	-2.045954276	0.003405752	0.842592259	-1.993601218	-1.946202375	-1.862731867	-1.825439172	1.757666049	1.422465003	-1.790524917	-1.757666049	-1.726602201	0.315058297	-1.697120332	-1.669043821	-1.642224543	-0.023842473	-1.568142731	-1.501786817	-1.48107362	0.044289159	1.130769373	-1.441453795	0.017029548	1.240815502	-1.422465003	0.508057465	0.358313528	-1.403975696	0.216235289	1.642224543	-1.385954264	-1.368372038	-1.351202935
GRMZM2G084717	-1.130769373	0.6448541	-0.146974467	-0.188425032	0.329407333	-1.993601218	0.112627241	-1.032943298	1.902810954	0.372878156	-0.603470624	1.105318189	2.171527717	-1.403975696	-0.933535639	0.017029548	0.085246759	0.731172307	0.882109877	-0.307908216	0.336607179	-0.439462999	-0.704730028	-0.882109877	0.587206217	-0.057930049	-0.343824517	1.48107362	0.307908216	2.345104662	0.43197323	-0.209267873	1.211918765	-2.468001988	-0.776421761	-0.477294855	-0.696025208	1.591873889	1.009990169	0.687372812	-0.43197323	0.446977502	0.804348643	0.91267586	1.032943298	1.368372038	-1.092857156	0.619896262	0.293654744
GRMZM2G009323	1.48107362	0.336607179	0.085246759	0.813797671	-0.758136008	0.492617885	0.300773842	-1.33442315	-1.697120332	0.767246816	-0.336607179	0.098927729	-0.181496015	1.403975696	-1.080563549	-1.170380633	1.902810954	-0.133217035	-0.315058297	-0.140092436	-1.726602201	-0.010217413	-0.030656506	0.785662535	-0.794970891	-0.587206217	0.307908216	0.713488578	0.105775004	0.35105981	1.616536998	1.226239142	1.862731867	-0.394875486	0.195363108	1.197842699	-0.35105981	0.424507616	-2.645701413	1.351202935	-1.092857156	-0.071581727	-1.790524917	-1.318010897	-0.064754379	1.130769373	-0.017029548	-0.965610478	-0.188425032
GRMZM2G017730	-0.595318735	1.143773961	-0.862182757	2.468001988	0.085246759	0.923055543	0.531447525	-0.409646587	-1.669043821	-0.105775004	-0.923055543	-0.133217035	-1.48107362	-0.293654744	1.403975696	1.368372038	0.611662814	-0.251237576	-0.09208509	0.358313528	-1.197842699	1.993601218	1.044626445	0.380190046	0.83291742	-0.74010031	-0.731172307	-0.230202032	0.037471962	-0.286550499	1.211918765	0.484942137	0.244213829	-0.713488578	0.272384894	1.130769373	0.603470624	1.501786817	-0.892205847	-0.523619123	0.944119285	-0.998710851	-0.670220259	-0.7490877	-0.661717677	1.48107362	0.064754379	1.286210621	-0.508057465
GRMZM2G101125	1.286210621	0.823319923	0.523619123	0.813797671	1.460977052	1.226239142	0.279460686	0.09208509	-2.645701413	2.104600628	1.523165155	-0.017029548	-0.126347925	0.358313528	-0.315058297	0.6448541	0.547203211	0.872103029	2.171527717	-0.167663737	1.170380633	2.645701413	-1.946202375	1.441453795	-0.372878156	-0.230202032	-0.954809756	-0.587206217	0.51582268	-1.117953259	0.064754379	0.315058297	-0.842592259	-0.500322766	-0.09208509	1.726602201	-1.105318189	0.670220259	1.862731867	1.184000049	0.003405752	-0.704730028	-1.351202935	-2.249880663	-0.794970891	-0.023842473	-0.785662535	0.071581727	-0.892205847
GRMZM2G040920	-0.417065588	0.307908216	-0.153863466	-0.078412413	-0.500322766	-0.687372812	0.477294855	-0.010217413	-2.998020796	1.105318189	-0.842592259	1.226239142	1.184000049	-0.767246816	-0.813797671	-1.757666049	-0.265322712	-0.017029548	0.731172307	0.140092436	-0.188425032	0.300773842	-1.993601218	-0.555132042	-0.619896262	-0.892205847	-0.722302208	0.336607179	0.286550499	1.301946185	1.545263217	-1.143773961	0.531447525	-0.181496015	-1.441453795	1.044626445	0.555132042	0.023842473	0.358313528	0.794970891	-0.394875486	1.255660378	0.202310601	0.965610478	1.902810954	2.468001988	0.998710851	0.45451733	0.579132162
GRMZM2G071206	0.687372812	-0.965610478	0.852346618	-0.064754379	0.670220259	-0.500322766	-0.037471962	0.531447525	1.143773961	0.244213829	1.757666049	0.933535639	0.071581727	-0.300773842	-0.842592259	0.286550499	0.167663737	-0.202310601	0.661717677	0.547203211	1.403975696	-0.140092436	0.508057465	0.571095686	0.523619123	1.862731867	0.492617885	-1.117953259	0.882109877	0.555132042	0.713488578	1.33442315	1.286210621	-1.422465003	0.469675385	0.051108415	0.923055543	-0.216235289	-1.301946185	0.83291742	-0.153863466	-0.146974467	2.645701413	2.045954276	2.249880663	-1.403975696	-0.813797671	1.591873889	-0.603470624
GRMZM2G175761	-0.508057465	1.318010897	1.092857156	-0.555132042	-0.500322766	1.545263217	1.757666049	-0.619896262	-1.902810954	0.987557182	0.336607179	0.713488578	0.105775004	-0.010217413	-1.726602201	-0.767246816	-0.003405752	1.021399468	-0.237202109	0.372878156	-0.181496015	0.358313528	-0.696025208	-0.882109877	0.636490883	-0.813797671	0.126347925	-0.661717677	0.954809756	1.184000049	1.351202935	0.7490877	0.365586148	-2.345104662	0.767246816	0.153863466	-2.468001988	-0.023842473	0.823319923	0.030656506	-0.571095686	0.872103029	-0.098927729	-0.603470624	0.023842473	2.998020796	0.188425032	0.195363108	0.492617885
GRMZM2G015080	0.813797671	-0.003405752	-0.687372812	-0.372878156	-0.531447525	-0.167663737	-0.51582268	-1.092857156	0.767246816	0.539308633	0.579132162	0.071581727	-0.037471962	-1.318010897	-0.387522319	-0.469675385	-0.722302208	-1.130769373	-1.460977052	-0.329407333	-0.892205847	-0.336607179	-0.322224522	-0.439462999	0.794970891	-0.35105981	-0.209267873	0.555132042	1.825439172	1.790524917	0.563095926	1.080563549	0.872103029	1.226239142	0.017029548	0.307908216	-0.160759774	0.300773842	-0.293654744	0.343824517	-0.500322766	-0.279460686	0.064754379	0.044289159	0.619896262	0.160759774	-1.226239142	-0.842592259	-0.619896262
GRMZM2G172320	-1.351202935	-0.45451733	0.380190046	1.33442315	0.372878156	-0.713488578	1.523165155	0.202310601	-1.902810954	0.133217035	-0.587206217	0.661717677	-1.044626445	0.343824517	0.571095686	-0.153863466	1.056453949	0.09208509	-0.862182757	-0.661717677	0.484942137	-0.636490883	0.315058297	-0.531447525	-1.993601218	0.882109877	-0.35105981	0.51582268	-0.767246816	-0.244213829	-0.462083086	-0.265322712	-1.255660378	-0.140092436	-1.056453949	0.794970891	0.923055543	-0.83291742	-1.757666049	0.230202032	1.117953259	1.143773961	-1.946202375	-1.286210621	-0.619896262	0.767246816	-2.249880663	0.653262666	0.43197323
GRMZM2G394732	-1.092857156	0.251237576	-1.130769373	-0.286550499	0.523619123	-0.611662814	1.33442315	-0.500322766	-1.351202935	0.279460686	-1.385954264	-0.223213218	0.030656506	1.032943298	-0.469675385	-1.226239142	0.286550499	0.09208509	-1.156974916	0.064754379	-0.776421761	-0.653262666	-0.523619123	-0.484942137	-0.987557182	-0.670220259	-0.785662535	0.933535639	0.017029548	2.104600628	-0.555132042	0.767246816	1.385954264	1.825439172	0.43197323	-0.794970891	-0.023842473	0.417065588	0.678771572	0.315058297	-0.358313528	-1.422465003	2.345104662	0.571095686	0.862182757	0.300773842	0.003405752	-0.892205847	0.160759774
GRMZM2G104025	-0.611662814	-0.531447525	0.484942137	-1.197842699	-2.045954276	-0.424507616	0.140092436	-0.484942137	-1.460977052	-0.842592259	-0.078412413	-0.563095926	0.223213218	1.184000049	-0.112627241	-0.523619123	0.882109877	-0.500322766	-0.140092436	-1.105318189	-1.726602201	-0.202310601	1.501786817	-1.33442315	-0.272384894	-1.184000049	-0.45451733	0.469675385	-0.987557182	0.998710851	0.315058297	1.33442315	0.523619123	1.056453949	0.251237576	0.119484771	0.064754379	-0.43197323	-1.211918765	-0.265322712	-0.064754379	1.862731867	1.068431117	1.032943298	-0.044289159	1.226239142	0.439462999	0.133217035	-0.293654744
GRMZM2G041899	-0.767246816	0.477294855	0.216235289	-0.112627241	-0.030656506	-1.226239142	1.286210621	-0.237202109	1.441453795	1.642224543	-0.998710851	0.713488578	2.171527717	-0.704730028	-0.051108415	0.603470624	0.882109877	0.595318735	-0.409646587	-0.417065588	0.767246816	-0.003405752	0.174575701	0.195363108	0.91267586	0.112627241	-0.579132162	1.523165155	-0.315058297	1.403975696	-1.385954264	-0.563095926	1.197842699	-0.380190046	1.301946185	0.167663737	-0.872103029	-0.954809756	1.790524917	0.329407333	0.336607179	-0.085246759	-0.322224522	-0.758136008	1.993601218	-0.74010031	-0.126347925	1.032943298	0.037471962
GRMZM2G380518	1.021399468	2.249880663	-0.35105981	0.882109877	-0.174575701	-0.272384894	1.385954264	-2.998020796	1.460977052	-2.645701413	-2.468001988	-0.43197323	1.422465003	1.368372038	-0.402250065	0.223213218	0.987557182	-0.251237576	1.523165155	-0.446977502	-0.409646587	-2.249880663	0.74010031	-2.171527717	0.098927729	1.184000049	-0.424507616	2.468001988	2.104600628	0.923055543	-0.531447525	0.365586148	0.35105981	-0.477294855	-2.045954276	0.071581727	-1.993601218	0.722302208	0.051108415	-0.293654744	-1.902810954	-1.862731867	-1.825439172	-1.790524917	0.146974467	0.343824517	-1.757666049	-0.508057465	-0.098927729
AC199175.2_FG003	1.044626445	-0.954809756	-0.336607179	-0.064754379	1.591873889	-2.998020796	1.255660378	0.902393588	2.104600628	-2.645701413	0.713488578	0.954809756	1.545263217	-0.823319923	-0.071581727	-0.83291742	0.579132162	1.33442315	0.35105981	-0.704730028	1.143773961	-2.249880663	-0.882109877	0.394875486	-0.595318735	0.251237576	-0.098927729	1.825439172	0.023842473	1.009990169	0.209267873	-0.372878156	0.167663737	-2.171527717	1.902810954	0.160759774	-0.687372812	-0.539308633	0.258273739	0.813797671	-0.619896262	-0.785662535	-0.603470624	-2.104600628	-2.045954276	0.944119285	0.279460686	-1.993601218	0.933535639
GRMZM2G173563	-0.547203211	-0.484942137	-0.09208509	0.687372812	-0.343824517	-1.130769373	0.462083086	0.300773842	-2.998020796	1.032943298	-1.726602201	0.902393588	0.794970891	-0.202310601	-0.852346618	0.188425032	-1.197842699	-0.230202032	1.286210621	-0.119484771	-0.462083086	-0.336607179	-1.318010897	-1.068431117	1.156974916	-0.188425032	-1.226239142	1.044626445	-1.021399468	1.501786817	-0.057930049	-0.394875486	-0.611662814	-0.794970891	-0.7490877	-0.105775004	0.140092436	0.944119285	-0.071581727	-0.293654744	-0.619896262	0.023842473	1.403975696	0.343824517	-0.595318735	1.184000049	-0.539308633	0.713488578	0.160759774
GRMZM2G162675	-0.064754379	1.460977052	0.595318735	0.6448541	-1.068431117	-0.044289159	-2.998020796	-1.286210621	-2.468001988	0.336607179	-0.126347925	1.226239142	0.508057465	-1.255660378	-0.508057465	0.265322712	-0.653262666	0.037471962	-2.345104662	0.417065588	1.068431117	0.500322766	-0.523619123	-0.358313528	-0.7490877	-0.539308633	0.112627241	0.872103029	0.998710851	1.642224543	1.501786817	-0.174575701	2.045954276	-2.171527717	0.670220259	0.882109877	0.372878156	1.790524917	1.092857156	0.722302208	0.003405752	0.944119285	-2.104600628	-2.045954276	0.153863466	1.021399468	1.441453795	-0.023842473	0.098927729
GRMZM2G418206	0.251237576	-1.211918765	-0.595318735	0.43197323	-0.678771572	1.170380633	-0.279460686	0.696025208	-2.468001988	0.872103029	-0.43197323	-0.272384894	-0.057930049	0.146974467	-0.571095686	0.619896262	2.104600628	-0.531447525	-1.825439172	0.547203211	-0.987557182	1.056453949	0.003405752	-0.892205847	-1.143773961	0.195363108	-0.181496015	-0.902393588	0.595318735	-0.731172307	1.032943298	1.117953259	1.197842699	-0.010217413	-0.687372812	1.009990169	0.954809756	0.223213218	-2.045954276	-0.251237576	1.441453795	-0.842592259	0.126347925	-0.017029548	-0.603470624	0.923055543	0.258273739	-0.071581727	-1.170380633
GRMZM5G807592	0.882109877	-0.446977502	-0.216235289	1.197842699	1.368372038	0.160759774	2.104600628	-1.825439172	-1.385954264	0.279460686	0.315058297	0.785662535	0.044289159	0.209267873	-0.579132162	0.852346618	-1.318010897	1.591873889	-0.547203211	0.230202032	-0.300773842	-1.143773961	-1.441453795	-1.403975696	0.767246816	0.265322712	-0.587206217	1.351202935	0.424507616	1.255660378	0.085246759	-0.365586148	0.7490877	1.021399468	0.051108415	-2.104600628	-0.315058297	-0.071581727	-0.195363108	1.403975696	-0.223213218	-1.301946185	1.385954264	0.611662814	-0.343824517	-0.611662814	0.51582268	-0.462083086	0.322224522
GRMZM2G077673	0.670220259	0.987557182	-0.417065588	-0.424507616	0.43197323	-0.315058297	0.722302208	-0.336607179	-2.998020796	-0.823319923	-0.209267873	2.171527717	1.790524917	0.017029548	-0.776421761	0.409646587	0.380190046	0.579132162	0.902393588	-1.33442315	-0.010217413	0.587206217	-2.045954276	0.133217035	-0.251237576	-0.998710851	-1.726602201	-1.568142731	0.167663737	1.021399468	0.661717677	-0.731172307	-0.112627241	-1.368372038	-0.74010031	-1.757666049	-1.460977052	1.080563549	2.104600628	0.619896262	-0.35105981	1.143773961	-0.813797671	-0.293654744	-0.539308633	1.117953259	-0.45451733	-0.555132042	-0.071581727
GRMZM2G063394	1.156974916	0.003405752	-0.678771572	1.009990169	0.842592259	-0.279460686	0.587206217	-0.112627241	-2.998020796	1.669043821	-0.43197323	1.993601218	1.790524917	-1.240815502	-1.301946185	0.446977502	-0.153863466	0.531447525	1.117953259	0.767246816	-0.446977502	-0.767246816	-2.345104662	0.140092436	0.251237576	-0.794970891	-1.441453795	-0.484942137	-0.91267586	0.265322712	1.080563549	1.255660378	0.188425032	-0.636490883	0.492617885	1.48107362	0.098927729	-1.422465003	0.794970891	0.279460686	-0.315058297	0.563095926	-1.351202935	-0.603470624	1.902810954	0.508057465	-1.642224543	-0.462083086	-0.140092436
GRMZM2G043383	2.249880663	0.696025208	0.882109877	1.226239142	-0.882109877	-0.105775004	0.704730028	-0.987557182	-2.171527717	0.976525035	-0.417065588	0.446977502	0.611662814	-0.555132042	0.265322712	0.758136008	1.092857156	-0.160759774	0.307908216	0.237202109	-1.523165155	0.804348643	-1.368372038	1.568142731	1.270787244	-0.195363108	0.279460686	0.336607179	0.923055543	-0.126347925	1.790524917	-0.078412413	-0.603470624	-1.902810954	-0.446977502	0.862182757	1.009990169	1.33442315	-0.842592259	0.776421761	-0.785662535	0.51582268	0.216235289	-1.422465003	-0.696025208	0.09208509	-0.508057465	0.653262666	-0.023842473
GRMZM2G021243	-0.153863466	0.500322766	-0.078412413	-1.226239142	0.923055543	0.571095686	-0.209267873	1.032943298	1.318010897	0.872103029	-0.216235289	0.687372812	-1.270787244	0.51582268	-0.7490877	-0.91267586	1.368372038	0.852346618	0.153863466	0.365586148	0.603470624	2.998020796	-0.965610478	-0.484942137	0.862182757	-0.469675385	0.91267586	-0.619896262	2.345104662	-1.757666049	0.133217035	0.160759774	-0.523619123	-1.902810954	-0.010217413	1.422465003	-0.057930049	0.105775004	-0.272384894	1.156974916	0.202310601	-0.237202109	-1.130769373	-2.249880663	-0.571095686	-1.080563549	-0.823319923	-1.33442315	-0.251237576
GRMZM2G034668	-1.270787244	-0.300773842	-0.098927729	0.216235289	-0.902393588	0.35105981	0.315058297	1.184000049	2.998020796	-0.976525035	-0.571095686	0.174575701	1.568142731	0.017029548	-0.343824517	-0.387522319	-0.45451733	0.195363108	1.669043821	-0.462083086	-1.825439172	-1.318010897	0.758136008	0.477294855	0.071581727	-0.085246759	1.616536998	-0.336607179	-0.74010031	0.085246759	-1.255660378	-0.804348643	0.687372812	-0.842592259	-0.933535639	-0.670220259	-1.117953259	0.358313528	-0.044289159	0.998710851	0.587206217	0.140092436	-0.003405752	0.424507616	0.611662814	0.563095926	-1.48107362	0.272384894	-0.372878156
GRMZM2G138330	0.153863466	-0.329407333	0.133217035	-0.293654744	0.713488578	0.023842473	0.628171949	0.508057465	1.211918765	1.441453795	0.446977502	1.862731867	0.251237576	0.279460686	0.484942137	-0.794970891	1.130769373	-0.300773842	-0.223213218	0.146974467	0.372878156	-1.48107362	0.030656506	-0.343824517	-0.7490877	0.017029548	-1.156974916	0.902393588	-2.045954276	0.244213829	0.195363108	0.500322766	-0.944119285	0.272384894	0.402250065	-2.104600628	-0.216235289	-1.080563549	1.105318189	0.336607179	-0.044289159	-0.078412413	0.892205847	-1.056453949	-2.468001988	-0.251237576	-0.923055543	0.842592259	-0.842592259
GRMZM2G127297	-1.197842699	0.758136008	0.071581727	0.09208509	-0.882109877	-0.153863466	1.044626445	-0.933535639	-2.345104662	0.579132162	-1.156974916	1.726602201	2.171527717	-0.823319923	-0.813797671	-1.790524917	-0.661717677	0.91267586	-2.171527717	0.882109877	0.842592259	-0.195363108	-1.902810954	0.112627241	0.767246816	-0.216235289	-0.272384894	0.7490877	0.417065588	1.642224543	1.616536998	-0.300773842	1.056453949	0.010217413	1.021399468	-0.307908216	0.424507616	1.105318189	1.009990169	0.394875486	-0.417065588	1.080563549	-0.83291742	1.117953259	1.385954264	-0.713488578	0.45451733	1.130769373	0.43197323
AC202567.4_FG004	-0.365586148	1.642224543	-2.998020796	0.500322766	-0.439462999	0.7490877	-0.358313528	-2.645701413	-2.345104662	1.441453795	-0.531447525	1.156974916	-0.539308633	-2.249880663	1.056453949	-0.571095686	-2.171527717	-2.104600628	0.223213218	1.318010897	0.579132162	1.301946185	0.195363108	-2.045954276	-1.993601218	-0.603470624	0.057930049	0.678771572	-1.902810954	-0.547203211	-0.098927729	-1.862731867	1.545263217	-1.825439172	-0.409646587	0.923055543	0.823319923	-0.469675385	0.902393588	-0.181496015	-0.105775004	0.595318735	-1.790524917	-1.757666049	1.422465003	-0.315058297	0.044289159	-1.726602201	-0.731172307
GRMZM2G018436	-0.563095926	0.126347925	-0.216235289	-0.7490877	-1.726602201	-1.790524917	0.892205847	-1.568142731	0.085246759	-0.146974467	-0.112627241	0.661717677	1.441453795	-1.130769373	-2.104600628	0.704730028	-0.933535639	-0.43197323	-0.030656506	-0.484942137	0.057930049	-0.119484771	-0.51582268	-1.422465003	0.794970891	-1.009990169	-0.571095686	2.345104662	-0.174575701	1.726602201	1.48107362	0.258273739	0.842592259	-0.394875486	-0.380190046	-0.842592259	-1.460977052	0.153863466	1.825439172	0.140092436	0.336607179	1.642224543	-0.531447525	0.547203211	1.044626445	0.603470624	0.329407333	1.286210621	-0.279460686
GRMZM2G152105	2.104600628	0.140092436	0.417065588	-0.439462999	0.872103029	2.171527717	-0.300773842	-0.358313528	-2.645701413	-0.044289159	0.044289159	0.492617885	1.009990169	-0.003405752	-0.209267873	0.954809756	1.790524917	1.211918765	0.209267873	1.130769373	-0.852346618	1.286210621	-1.616536998	0.678771572	-0.09208509	-0.030656506	1.368372038	-0.758136008	1.117953259	-0.670220259	0.804348643	1.501786817	0.244213829	-0.74010031	1.545263217	1.092857156	0.237202109	1.460977052	0.813797671	1.255660378	-1.170380633	-1.130769373	-2.045954276	-1.790524917	-0.112627241	-0.611662814	-0.862182757	-0.508057465	0.064754379
GRMZM5G874167	-0.653262666	0.500322766	-0.09208509	1.021399468	-1.33442315	-0.767246816	-0.670220259	-1.568142731	0.722302208	-1.422465003	-0.237202109	0.539308633	0.45451733	-0.731172307	0.508057465	-0.539308633	-0.315058297	0.43197323	-0.133217035	0.003405752	-0.722302208	-1.092857156	2.645701413	-1.441453795	0.976525035	0.579132162	-0.286550499	0.619896262	0.484942137	1.862731867	1.697120332	1.130769373	1.757666049	-1.790524917	-1.170380633	0.030656506	1.368372038	0.133217035	-0.181496015	1.170380633	-2.998020796	-0.7490877	0.293654744	-0.017029548	0.696025208	-0.057930049	-0.954809756	-0.998710851	0.044289159
GRMZM2G026309	1.545263217	0.209267873	-0.105775004	-0.010217413	0.343824517	0.954809756	1.301946185	-0.595318735	-2.645701413	0.882109877	-0.628171949	1.726602201	0.140092436	0.286550499	-0.140092436	-0.380190046	1.068431117	1.105318189	0.852346618	0.794970891	0.223213218	-0.394875486	-1.902810954	1.33442315	1.403975696	0.272384894	-0.902393588	-1.568142731	-0.098927729	-0.09208509	0.587206217	1.385954264	-0.804348643	-1.021399468	-0.439462999	1.697120332	1.009990169	0.611662814	-0.523619123	0.547203211	-0.619896262	-0.661717677	-0.944119285	-0.547203211	0.74010031	0.380190046	-1.092857156	0.071581727	1.143773961
GRMZM2G169227	1.862731867	-1.318010897	0.272384894	1.568142731	0.258273739	0.51582268	-0.140092436	-0.813797671	1.056453949	0.223213218	0.216235289	-0.09208509	-0.044289159	-0.195363108	-0.704730028	0.030656506	0.140092436	-0.523619123	-2.998020796	0.105775004	0.244213829	-0.653262666	1.117953259	0.230202032	-1.669043821	-0.731172307	0.611662814	0.902393588	-0.057930049	-1.568142731	-1.385954264	0.555132042	0.293654744	-0.272384894	1.422465003	0.713488578	-0.611662814	-0.500322766	-1.642224543	-0.085246759	-0.017029548	0.439462999	1.211918765	0.409646587	1.270787244	0.098927729	-0.758136008	0.380190046	0.687372812
GRMZM2G040326	1.105318189	0.713488578	-0.603470624	1.318010897	-0.35105981	1.226239142	1.460977052	0.380190046	-2.104600628	1.48107362	0.329407333	1.790524917	0.653262666	-0.409646587	-0.174575701	1.501786817	1.902810954	0.944119285	0.636490883	0.492617885	0.563095926	1.080563549	-1.197842699	-0.804348643	-1.642224543	0.098927729	0.595318735	0.078412413	0.531447525	1.403975696	2.345104662	1.270787244	1.757666049	0.300773842	0.902393588	0.030656506	0.892205847	-0.944119285	-1.993601218	-0.619896262	-0.842592259	0.146974467	-1.902810954	-1.757666049	-1.591873889	1.286210621	-0.329407333	-0.446977502	-1.286210621
GRMZM2G472311	-0.731172307	0.365586148	0.661717677	0.731172307	-0.462083086	-2.998020796	-2.645701413	0.571095686	1.351202935	-0.209267873	0.563095926	0.976525035	2.045954276	-2.171527717	-0.611662814	-2.104600628	-0.174575701	0.265322712	-2.045954276	1.184000049	-0.619896262	-1.946202375	-1.902810954	1.697120332	1.993601218	-0.140092436	-0.628171949	-1.862731867	-1.825439172	1.669043821	0.307908216	0.539308633	0.244213829	0.892205847	0.202310601	-1.757666049	0.43197323	-1.726602201	0.358313528	-0.112627241	-0.146974467	0.343824517	-1.697120332	0.954809756	-0.286550499	0.83291742	-1.669043821	-0.394875486	0.112627241
GRMZM2G117347	0.587206217	-2.998020796	-2.645701413	-2.468001988	0.35105981	-2.345104662	1.184000049	-2.249880663	2.645701413	0.7490877	-2.171527717	1.197842699	0.439462999	-1.993601218	0.987557182	0.380190046	-1.946202375	-1.902810954	1.902810954	-1.862731867	0.492617885	-1.757666049	1.726602201	1.068431117	-1.726602201	0.315058297	-1.697120332	0.539308633	-1.669043821	1.117953259	-1.642224543	0.813797671	0.595318735	0.892205847	-1.591873889	-1.568142731	-1.545263217	-1.501786817	0.322224522	0.251237576	0.230202032	1.105318189	-1.48107362	-1.460977052	-1.441453795	0.167663737	-1.422465003	-1.403975696	-1.385954264
GRMZM2G135332	-0.670220259	-0.74010031	0.722302208	1.270787244	1.368372038	-0.037471962	-1.669043821	-0.603470624	2.645701413	0.365586148	1.197842699	0.636490883	-0.35105981	-1.642224543	0.160759774	1.616536998	-1.009990169	-1.286210621	1.697120332	0.380190046	-1.130769373	0.230202032	-0.636490883	0.188425032	-0.531447525	-0.195363108	-0.003405752	0.258273739	0.071581727	1.403975696	0.272384894	-0.140092436	0.329407333	-2.171527717	1.170380633	0.555132042	0.237202109	-1.862731867	0.571095686	2.171527717	0.209267873	-0.051108415	-0.343824517	-0.902393588	-0.653262666	-1.184000049	-0.105775004	-1.105318189	-1.092857156
GRMZM2G086876	0.133217035	0.539308633	0.571095686	-0.794970891	0.223213218	-0.071581727	-0.45451733	-1.032943298	1.642224543	0.071581727	-0.976525035	1.460977052	1.993601218	-1.270787244	-1.184000049	-0.83291742	0.51582268	0.882109877	-1.33442315	-0.085246759	0.902393588	-0.722302208	-0.078412413	-0.35105981	0.387522319	-0.508057465	-0.402250065	0.944119285	0.872103029	0.45451733	-0.030656506	-1.080563549	-0.469675385	-1.669043821	0.965610478	-0.140092436	0.085246759	-1.568142731	0.195363108	-0.202310601	-1.726602201	-0.852346618	-0.619896262	-0.336607179	1.862731867	-0.462083086	-0.477294855	0.531447525	0.188425032
GRMZM2G025072	0.611662814	-0.181496015	0.160759774	1.501786817	0.862182757	-0.902393588	-0.209267873	-0.794970891	-2.345104662	0.279460686	0.758136008	1.032943298	2.645701413	-0.91267586	0.119484771	0.842592259	0.071581727	-1.143773961	0.713488578	-0.923055543	-0.882109877	-0.462083086	-0.030656506	0.7490877	-0.595318735	-0.258273739	-0.74010031	0.085246759	0.595318735	0.872103029	-0.539308633	-1.130769373	-0.279460686	-1.902810954	0.244213829	0.057930049	-0.098927729	0.6448541	0.619896262	1.156974916	-0.603470624	1.825439172	-0.653262666	0.078412413	0.023842473	1.591873889	-1.009990169	-0.987557182	0.571095686
GRMZM5G813217	1.032943298	0.336607179	0.307908216	0.446977502	0.477294855	0.35105981	2.645701413	-1.009990169	-2.998020796	1.441453795	-0.45451733	0.661717677	-0.010217413	0.902393588	0.462083086	-0.439462999	-0.446977502	1.240815502	-1.105318189	0.804348643	1.226239142	0.216235289	-1.591873889	-0.195363108	0.098927729	-0.160759774	0.265322712	-2.345104662	-0.300773842	-0.462083086	0.83291742	0.409646587	0.372878156	0.258273739	1.068431117	-0.933535639	-0.126347925	1.056453949	-0.892205847	0.731172307	1.044626445	-0.329407333	0.976525035	0.272384894	-0.785662535	0.813797671	-0.547203211	-0.603470624	1.790524917
GRMZM2G178341	1.009990169	0.195363108	0.83291742	0.358313528	0.563095926	-0.469675385	0.785662535	-1.669043821	-0.09208509	0.43197323	1.170380633	0.244213829	0.153863466	1.044626445	1.318010897	1.197842699	-0.133217035	-1.368372038	-0.119484771	-0.315058297	-1.993601218	-0.244213829	1.33442315	0.372878156	-0.037471962	0.078412413	-0.547203211	0.35105981	-0.329407333	0.653262666	0.933535639	1.143773961	1.156974916	0.380190046	0.678771572	-0.439462999	0.579132162	0.307908216	-0.731172307	-0.017029548	-0.842592259	0.424507616	0.823319923	-0.508057465	0.017029548	0.722302208	1.226239142	0.462083086	0.555132042
GRMZM2G085568	1.197842699	0.146974467	-0.477294855	0.071581727	0.91267586	0.446977502	0.394875486	-0.146974467	-1.642224543	-1.130769373	-0.023842473	2.468001988	1.403975696	-0.587206217	-1.368372038	-0.372878156	0.862182757	1.790524917	-0.862182757	-0.696025208	-0.923055543	0.358313528	-1.697120332	0.902393588	0.417065588	-0.976525035	-0.842592259	-1.523165155	-0.678771572	-1.211918765	-1.080563549	-1.044626445	-0.160759774	-0.882109877	1.211918765	0.804348643	-0.902393588	-0.258273739	-0.43197323	-0.230202032	-0.133217035	-0.209267873	-0.852346618	-0.112627241	0.722302208	0.300773842	0.057930049	0.153863466	0.188425032
GRMZM2G103955	0.223213218	1.255660378	-0.611662814	0.105775004	0.563095926	1.197842699	0.902393588	-0.661717677	-2.645701413	0.195363108	0.030656506	0.523619123	-0.237202109	0.872103029	-1.092857156	-0.279460686	1.270787244	0.469675385	0.146974467	0.237202109	-1.211918765	-0.882109877	-1.403975696	0.83291742	2.345104662	0.35105981	0.279460686	0.160759774	1.156974916	1.368372038	1.568142731	1.184000049	1.068431117	-1.286210621	0.216235289	2.171527717	-0.358313528	1.669043821	-0.933535639	0.477294855	0.300773842	-0.758136008	0.704730028	-0.223213218	0.023842473	0.670220259	-0.343824517	-0.91267586	1.422465003
GRMZM2G044670	0.923055543	0.140092436	1.351202935	-0.167663737	0.603470624	1.790524917	-0.35105981	-0.424507616	2.645701413	-0.160759774	-2.645701413	0.112627241	0.785662535	-0.307908216	1.286210621	0.209267873	0.670220259	0.767246816	-2.345104662	1.902810954	-2.249880663	0.579132162	1.726602201	0.469675385	0.380190046	0.119484771	0.619896262	0.500322766	1.032943298	-0.272384894	-2.171527717	0.387522319	-0.628171949	-2.045954276	0.336607179	-0.372878156	-0.477294855	-1.993601218	0.571095686	-0.057930049	-0.098927729	-0.571095686	0.704730028	-1.946202375	1.009990169	0.105775004	0.933535639	1.092857156	0.731172307
GRMZM2G045883	0.071581727	0.09208509	0.83291742	0.603470624	0.636490883	-1.156974916	0.954809756	-0.74010031	2.468001988	-0.258273739	0.862182757	1.130769373	-0.619896262	-0.882109877	0.064754379	-0.372878156	0.882109877	-0.998710851	1.669043821	1.642224543	0.51582268	-0.785662535	1.385954264	0.315058297	0.492617885	0.477294855	-0.402250065	0.661717677	-0.315058297	1.403975696	1.021399468	-0.167663737	1.170380633	-0.174575701	-1.255660378	0.387522319	-0.010217413	-0.446977502	-0.636490883	1.056453949	-0.852346618	-0.387522319	-0.286550499	-0.91267586	-1.726602201	0.329407333	-1.422465003	-0.071581727	-1.368372038
AC203019.3_FG001	0.365586148	0.336607179	0.611662814	0.105775004	0.167663737	-0.133217035	1.726602201	-0.230202032	-2.645701413	0.126347925	-2.468001988	-0.628171949	2.249880663	0.446977502	1.351202935	-0.126347925	0.307908216	-0.500322766	-0.279460686	1.545263217	-0.603470624	0.085246759	1.368372038	-0.098927729	0.636490883	0.064754379	0.051108415	1.591873889	0.696025208	0.279460686	-2.249880663	-0.987557182	0.523619123	-0.696025208	-0.307908216	-0.933535639	0.057930049	0.133217035	0.628171949	1.501786817	0.484942137	-2.104600628	-2.045954276	-1.993601218	0.944119285	-0.286550499	-1.946202375	-1.902810954	0.469675385
GRMZM5G887716	-1.068431117	-0.244213829	-0.023842473	-0.258273739	-0.315058297	-1.044626445	0.279460686	-0.933535639	-2.645701413	1.226239142	-0.823319923	-0.713488578	0.794970891	-0.336607179	-1.130769373	-0.380190046	-0.230202032	0.003405752	-0.188425032	0.286550499	-1.240815502	-1.226239142	0.167663737	-1.757666049	0.380190046	-0.133217035	-0.462083086	0.030656506	-0.010217413	1.993601218	0.402250065	0.017029548	0.119484771	0.195363108	-0.424507616	0.251237576	-0.293654744	-0.51582268	0.462083086	0.09208509	-0.167663737	-0.852346618	1.697120332	0.731172307	0.7490877	1.021399468	-0.071581727	-0.469675385	0.823319923
GRMZM2G149153	1.143773961	-0.91267586	-0.167663737	0.500322766	0.446977502	1.591873889	-0.547203211	0.91267586	-2.998020796	0.571095686	-0.237202109	0.987557182	-0.469675385	-0.619896262	-0.105775004	-0.146974467	0.944119285	0.595318735	-1.460977052	0.7490877	0.35105981	1.130769373	-1.946202375	0.402250065	-0.531447525	0.085246759	0.387522319	-2.249880663	-0.265322712	-1.197842699	-0.477294855	0.424507616	-0.670220259	-1.021399468	0.83291742	1.523165155	0.696025208	-1.301946185	-0.394875486	-0.417065588	0.322224522	-0.74010031	-1.385954264	-0.965610478	-0.078412413	-0.767246816	-1.156974916	-0.202310601	-0.636490883
GRMZM2G366140	-0.603470624	-2.998020796	-0.365586148	0.017029548	-0.188425032	1.403975696	0.767246816	-2.645701413	-2.468001988	0.508057465	-2.345104662	0.300773842	0.7490877	-0.153863466	-2.171527717	0.140092436	0.057930049	-2.104600628	1.156974916	0.619896262	0.687372812	-2.045954276	-0.595318735	0.387522319	0.713488578	-0.731172307	-0.409646587	-1.993601218	-0.322224522	-0.704730028	0.160759774	-0.670220259	-1.946202375	-0.696025208	-0.439462999	1.318010897	-0.402250065	0.965610478	2.249880663	-0.315058297	-0.329407333	-0.508057465	-1.902810954	-0.071581727	-0.037471962	0.6448541	1.726602201	0.195363108	-1.862731867
GRMZM2G055999	2.249880663	-1.697120332	0.713488578	0.424507616	0.563095926	1.757666049	-1.318010897	-0.579132162	0.409646587	-0.279460686	-0.785662535	-0.098927729	-0.160759774	-0.539308633	-0.424507616	-0.343824517	2.045954276	0.293654744	0.595318735	-1.240815502	-0.628171949	1.170380633	-1.117953259	-0.484942137	0.343824517	-0.372878156	1.117953259	0.500322766	0.987557182	-1.143773961	0.923055543	1.790524917	1.902810954	-0.057930049	0.872103029	-0.300773842	-0.603470624	-0.555132042	-0.251237576	0.944119285	-0.45451733	0.188425032	-1.946202375	-1.301946185	0.394875486	-1.33442315	-1.184000049	-0.181496015	0.492617885
GRMZM5G896604	-0.678771572	1.255660378	0.003405752	-0.563095926	-1.318010897	0.813797671	0.272384894	-0.265322712	1.226239142	0.394875486	0.484942137	-0.286550499	0.83291742	1.642224543	-0.862182757	0.307908216	1.156974916	0.785662535	1.902810954	-1.211918765	-1.501786817	-0.394875486	-0.085246759	-1.105318189	0.064754379	-0.071581727	-0.595318735	0.595318735	-0.209267873	1.726602201	2.249880663	0.555132042	1.368372038	0.167663737	0.704730028	0.372878156	-1.385954264	0.133217035	0.563095926	-0.611662814	-1.862731867	-0.976525035	0.044289159	-0.872103029	-0.160759774	-0.987557182	-0.83291742	-1.697120332	-0.167663737
GRMZM5G800973	1.946202375	-0.126347925	-2.998020796	-0.74010031	0.587206217	-0.882109877	0.167663737	0.105775004	-0.037471962	0.508057465	0.424507616	0.862182757	0.322224522	0.380190046	0.944119285	0.279460686	-0.477294855	0.892205847	1.032943298	-2.345104662	1.351202935	0.619896262	-2.249880663	1.862731867	-2.171527717	1.255660378	-0.424507616	-2.104600628	0.492617885	-0.484942137	-0.051108415	0.195363108	-0.402250065	1.240815502	-0.636490883	2.249880663	-0.409646587	0.776421761	-0.547203211	0.661717677	0.119484771	-0.307908216	-0.057930049	0.336607179	0.223213218	1.33442315	-0.181496015	-0.954809756	-0.329407333
GRMZM2G126446	1.523165155	-0.160759774	-1.021399468	0.35105981	0.223213218	1.460977052	0.133217035	-0.181496015	-2.171527717	1.226239142	0.085246759	0.987557182	-0.216235289	-0.653262666	0.882109877	0.09208509	0.704730028	0.43197323	-0.767246816	0.998710851	-0.74010031	0.603470624	-1.825439172	0.767246816	-1.117953259	-0.571095686	0.112627241	-0.722302208	0.098927729	1.184000049	1.545263217	0.823319923	-0.146974467	-1.301946185	0.563095926	0.293654744	1.009990169	0.611662814	-0.500322766	0.237202109	-0.279460686	0.678771572	0.484942137	-1.105318189	-0.057930049	0.785662535	-1.351202935	0.7490877	-0.343824517
GRMZM2G020429	0.078412413	1.286210621	-0.882109877	0.424507616	0.051108415	0.300773842	0.653262666	0.670220259	-2.249880663	0.017029548	-0.842592259	1.946202375	0.731172307	0.057930049	-2.104600628	-1.697120332	1.170380633	1.255660378	-0.794970891	0.91267586	0.258273739	-0.064754379	-1.862731867	0.661717677	-0.661717677	-0.767246816	-0.51582268	-0.030656506	1.301946185	-0.279460686	1.105318189	-0.119484771	0.146974467	-0.343824517	0.098927729	1.697120332	0.35105981	0.508057465	-0.071581727	1.422465003	-1.032943298	-0.160759774	-0.758136008	-1.080563549	0.872103029	-0.230202032	-1.441453795	-0.424507616	0.010217413
GRMZM2G076896	-0.380190046	1.351202935	1.143773961	-0.071581727	-2.998020796	-2.645701413	1.441453795	-0.653262666	0.842592259	0.704730028	-0.852346618	-0.785662535	2.998020796	-0.365586148	-0.085246759	-0.998710851	-0.153863466	0.776421761	-0.500322766	-0.279460686	-0.477294855	-2.345104662	-0.603470624	-0.358313528	-0.09208509	-2.249880663	-0.767246816	1.318010897	0.394875486	1.862731867	-2.171527717	-0.230202032	1.790524917	-2.045954276	-0.508057465	-0.387522319	-0.098927729	1.591873889	1.642224543	1.616536998	-1.993601218	1.460977052	0.085246759	0.237202109	-0.823319923	0.372878156	-1.946202375	-0.91267586	-0.195363108
GRMZM2G152824	-0.619896262	-2.998020796	-2.645701413	1.790524917	-0.500322766	0.085246759	-0.146974467	1.044626445	0.071581727	1.368372038	0.661717677	-0.286550499	-0.251237576	-0.071581727	2.468001988	1.130769373	-0.358313528	0.272384894	-0.044289159	1.226239142	0.767246816	-1.286210621	-0.823319923	-0.477294855	1.568142731	-1.351202935	-0.462083086	0.7490877	-1.156974916	-0.713488578	-2.468001988	0.43197323	1.156974916	-0.181496015	1.143773961	-2.345104662	1.318010897	-1.48107362	0.09208509	0.037471962	0.965610478	0.023842473	0.078412413	0.237202109	0.064754379	-0.469675385	-0.51582268	-0.365586148	-0.133217035
GRMZM2G354560	1.697120332	-2.998020796	1.441453795	0.105775004	-2.645701413	1.825439172	2.045954276	0.7490877	-2.468001988	1.056453949	-0.146974467	0.794970891	1.211918765	1.032943298	-2.171527717	-0.244213829	1.068431117	1.170380633	-2.104600628	0.484942137	-1.993601218	0.343824517	0.987557182	0.892205847	-1.946202375	-1.902810954	0.098927729	0.286550499	0.563095926	0.439462999	1.286210621	1.143773961	1.523165155	1.197842699	-0.044289159	-1.862731867	-1.825439172	-1.790524917	-1.757666049	0.146974467	0.424507616	-1.726602201	0.842592259	0.230202032	0.336607179	0.35105981	-1.697120332	0.037471962	0.394875486
GRMZM2G406378	0.272384894	0.731172307	-0.105775004	-0.670220259	0.322224522	-0.35105981	0.998710851	-1.286210621	0.595318735	-1.032943298	-1.240815502	0.023842473	-0.365586148	0.153863466	-1.501786817	-1.105318189	-0.112627241	0.424507616	0.687372812	1.286210621	-1.009990169	-0.484942137	0.09208509	-1.48107362	1.545263217	-0.539308633	-0.402250065	1.318010897	0.678771572	1.697120332	1.523165155	1.902810954	0.417065588	0.767246816	-1.591873889	0.037471962	-0.181496015	1.48107362	-0.892205847	0.722302208	-0.547203211	-0.531447525	1.301946185	0.619896262	0.794970891	-0.160759774	0.439462999	-0.085246759	0.230202032
GRMZM2G340456	1.642224543	-0.547203211	-0.477294855	0.555132042	0.767246816	1.33442315	-0.244213829	-0.09208509	-1.790524917	0.216235289	0.119484771	1.211918765	-0.272384894	-0.343824517	-0.051108415	-0.044289159	2.249880663	2.104600628	-1.523165155	0.587206217	0.044289159	0.902393588	-2.249880663	0.758136008	-0.293654744	0.167663737	0.439462999	-1.862731867	0.424507616	-1.117953259	-0.563095926	0.409646587	-0.322224522	-0.446977502	1.523165155	1.591873889	0.976525035	-1.021399468	-0.140092436	-0.731172307	0.051108415	-0.965610478	-1.545263217	-0.83291742	0.500322766	-0.670220259	-0.611662814	0.037471962	-0.424507616
GRMZM2G134219	0.105775004	-2.998020796	-0.181496015	-0.202310601	1.240815502	0.492617885	0.387522319	-2.645701413	-2.345104662	-2.249880663	-2.171527717	1.568142731	-0.258273739	0.944119285	0.010217413	-0.279460686	1.616536998	0.758136008	-0.017029548	-0.230202032	0.003405752	0.223213218	-0.119484771	-0.272384894	-1.946202375	0.439462999	-0.223213218	0.417065588	-1.902810954	-0.078412413	0.51582268	0.872103029	0.976525035	-0.057930049	-1.790524917	-1.757666049	-1.726602201	0.579132162	-1.669043821	-1.642224543	-1.616536998	1.105318189	-1.591873889	-1.568142731	-1.545263217	0.687372812	0.293654744	2.045954276	0.611662814
GRMZM2G010937	0.484942137	0.372878156	-0.987557182	-0.394875486	0.424507616	0.595318735	0.6448541	0.286550499	-2.998020796	-0.258273739	-0.372878156	0.394875486	1.523165155	-0.174575701	0.017029548	-0.462083086	0.085246759	0.965610478	-1.523165155	1.044626445	-0.923055543	0.477294855	-2.468001988	0.195363108	1.385954264	-0.852346618	-0.35105981	-2.045954276	-0.085246759	-0.965610478	0.030656506	-0.628171949	-0.794970891	-0.098927729	0.767246816	0.713488578	1.117953259	0.244213829	1.197842699	0.387522319	0.023842473	-0.146974467	-0.251237576	-0.944119285	1.460977052	-0.636490883	-0.687372812	0.923055543	0.987557182
GRMZM2G332111	1.105318189	1.068431117	-2.998020796	0.704730028	2.998020796	1.117953259	1.757666049	0.587206217	0.343824517	0.987557182	1.422465003	-2.468001988	0.098927729	0.037471962	-2.171527717	0.500322766	0.216235289	1.197842699	-2.104600628	1.286210621	-1.993601218	-1.946202375	0.258273739	-1.902810954	-1.862731867	0.223213218	0.380190046	-1.790524917	1.056453949	-1.757666049	-1.726602201	-1.697120332	0.477294855	0.852346618	0.51582268	-0.017029548	-1.669043821	0.469675385	-1.616536998	-1.591873889	0.188425032	-1.568142731	-1.545263217	-1.523165155	0.126347925	0.636490883	-1.501786817	-1.48107362	0.307908216
GRMZM2G122437	0.611662814	1.240815502	0.051108415	0.902393588	-0.174575701	-0.293654744	1.143773961	-1.080563549	0.322224522	2.104600628	-0.51582268	1.422465003	-0.258273739	0.286550499	0.661717677	-0.237202109	-0.140092436	0.293654744	-0.842592259	-0.563095926	0.804348643	-2.249880663	-0.776421761	0.500322766	-0.251237576	1.197842699	1.009990169	1.697120332	0.619896262	0.133217035	-1.757666049	0.678771572	-0.417065588	1.056453949	0.722302208	-1.726602201	0.315058297	1.117953259	0.35105981	0.140092436	-0.653262666	-1.032943298	1.318010897	0.7490877	-0.484942137	-0.794970891	-0.758136008	0.713488578	0.209267873
GRMZM2G013981	0.713488578	-0.188425032	0.358313528	0.804348643	1.092857156	-0.315058297	-0.439462999	0.603470624	-1.240815502	1.862731867	-0.343824517	1.48107362	-0.409646587	-0.603470624	0.272384894	0.044289159	0.555132042	0.057930049	-1.318010897	1.301946185	-1.523165155	0.181496015	-0.587206217	0.133217035	-1.669043821	0.387522319	-0.216235289	-0.767246816	-0.492617885	-0.037471962	0.237202109	0.365586148	0.216235289	-1.368372038	0.251237576	1.790524917	-0.293654744	-0.776421761	0.09208509	-0.731172307	0.794970891	-1.545263217	1.441453795	-0.823319923	-0.892205847	0.976525035	-0.372878156	1.523165155	-0.010217413
GRMZM2G019361	1.270787244	0.230202032	0.09208509	0.044289159	-0.462083086	0.469675385	0.202310601	-0.140092436	-2.468001988	-0.563095926	-1.523165155	0.45451733	1.790524917	0.037471962	-0.523619123	-0.892205847	0.372878156	-0.119484771	0.611662814	0.424507616	0.6448541	-0.722302208	-1.790524917	-1.226239142	0.286550499	0.965610478	-0.965610478	-1.368372038	-1.068431117	0.188425032	-0.987557182	-0.365586148	-0.251237576	-1.255660378	-0.258273739	0.785662535	0.336607179	-1.501786817	0.105775004	0.209267873	-1.032943298	-0.933535639	-2.998020796	-1.862731867	-0.923055543	0.603470624	-0.547203211	1.33442315	1.591873889
GRMZM2G017578	0.636490883	-0.030656506	0.987557182	0.477294855	0.394875486	0.112627241	0.044289159	-0.484942137	0.174575701	-0.202310601	0.017029548	-0.071581727	0.078412413	0.010217413	-1.33442315	-1.501786817	0.611662814	-0.74010031	1.946202375	0.307908216	-0.785662535	0.539308633	-0.336607179	-1.301946185	1.726602201	0.776421761	-0.687372812	0.842592259	-0.037471962	0.944119285	0.571095686	0.051108415	-0.500322766	0.265322712	-0.387522319	-0.322224522	-0.45451733	0.202310601	-1.616536998	-0.965610478	-0.653262666	-0.181496015	-0.713488578	1.211918765	1.240815502	-1.862731867	-0.933535639	-0.823319923	-0.998710851
GRMZM2G338465	1.105318189	1.946202375	0.300773842	-0.862182757	-0.365586148	-1.568142731	-0.085246759	1.009990169	1.441453795	1.255660378	2.104600628	2.998020796	2.249880663	-0.153863466	-0.45451733	0.852346618	-0.6448541	0.563095926	0.670220259	-1.056453949	0.322224522	-0.731172307	-0.037471962	-0.223213218	0.892205847	1.068431117	-0.484942137	1.170380633	-0.713488578	2.171527717	-0.696025208	-0.300773842	0.794970891	-0.776421761	0.307908216	0.188425032	1.117953259	1.523165155	0.976525035	0.358313528	-0.722302208	0.785662535	-0.417065588	-1.545263217	-0.322224522	0.842592259	-0.661717677	-0.998710851	1.33442315
GRMZM2G457881	0.322224522	-0.628171949	-1.170380633	0.09208509	0.902393588	-0.484942137	-1.092857156	-0.852346618	-2.104600628	0.293654744	-1.032943298	0.387522319	-1.044626445	0.892205847	-0.767246816	-0.044289159	2.645701413	1.669043821	-1.669043821	0.83291742	-1.255660378	0.195363108	-1.790524917	-0.823319923	-0.216235289	0.003405752	0.987557182	-1.318010897	-0.91267586	0.823319923	0.595318735	0.43197323	0.563095926	0.202310601	0.587206217	0.265322712	-0.446977502	0.603470624	-0.492617885	0.057930049	-0.785662535	-0.071581727	-0.153863466	1.092857156	0.998710851	1.862731867	1.48107362	-0.098927729	1.143773961
GRMZM2G399383	0.767246816	0.785662535	-0.078412413	0.078412413	-0.477294855	-1.993601218	0.998710851	-1.669043821	0.902393588	-0.315058297	0.064754379	1.726602201	-0.653262666	0.044289159	-0.037471962	1.170380633	0.230202032	-0.687372812	0.202310601	0.307908216	-0.611662814	-0.902393588	-0.358313528	-0.965610478	0.823319923	-0.842592259	-2.171527717	-1.616536998	-0.160759774	-0.508057465	0.098927729	0.051108415	0.636490883	-0.484942137	0.037471962	-0.251237576	-0.300773842	0.146974467	0.508057465	0.071581727	-1.170380633	-0.216235289	2.171527717	0.619896262	1.318010897	0.794970891	-0.09208509	0.579132162	-0.017029548
GRMZM2G005737	0.372878156	0.286550499	-1.056453949	1.368372038	1.48107362	0.563095926	0.51582268	-1.170380633	-2.998020796	0.804348643	0.862182757	-0.112627241	0.7490877	0.037471962	-0.555132042	-0.713488578	0.998710851	0.336607179	-1.385954264	-0.279460686	-0.181496015	-0.965610478	-0.767246816	-0.813797671	1.642224543	1.068431117	0.547203211	-1.862731867	-1.501786817	-1.351202935	-1.197842699	0.126347925	0.394875486	-1.286210621	0.223213218	0.531447525	-0.051108415	-0.563095926	-1.240815502	0.678771572	0.010217413	-0.923055543	0.098927729	0.722302208	0.230202032	1.211918765	0.661717677	0.713488578	0.687372812
GRMZM5G851103	0.343824517	1.616536998	-1.568142731	-1.032943298	0.315058297	0.882109877	-0.272384894	0.603470624	-1.117953259	-0.852346618	-0.402250065	1.080563549	-1.130769373	1.501786817	-0.595318735	-0.823319923	1.669043821	0.6448541	-0.767246816	-0.146974467	-0.547203211	1.697120332	0.09208509	-0.358313528	1.318010897	-0.998710851	-0.713488578	0.358313528	-0.112627241	0.003405752	0.944119285	-0.322224522	0.202310601	0.785662535	-1.226239142	-0.09208509	0.044289159	0.998710851	-1.946202375	1.170380633	-0.372878156	-2.104600628	0.508057465	0.409646587	0.365586148	0.531447525	-0.167663737	0.133217035	-1.993601218
GRMZM2G110212	2.171527717	-0.45451733	-0.343824517	0.976525035	0.6448541	1.993601218	0.424507616	-0.35105981	-1.902810954	-1.422465003	-0.195363108	-0.272384894	-0.372878156	0.469675385	0.628171949	0.882109877	1.902810954	0.387522319	-1.501786817	1.441453795	-0.258273739	0.174575701	-1.993601218	1.48107362	1.286210621	0.160759774	-0.661717677	-1.523165155	0.244213829	-0.439462999	1.240815502	1.105318189	-0.286550499	-2.171527717	0.209267873	1.669043821	0.767246816	1.501786817	-0.636490883	1.460977052	-0.064754379	0.098927729	-2.645701413	-1.170380633	0.279460686	-0.017029548	-0.653262666	-0.722302208	0.237202109
GRMZM2G132450	0.767246816	0.587206217	-0.394875486	-0.7490877	0.078412413	1.286210621	-0.265322712	-1.368372038	2.998020796	-0.872103029	-0.017029548	2.645701413	-0.064754379	-0.153863466	0.153863466	-1.156974916	0.579132162	0.776421761	0.223213218	0.722302208	-0.030656506	-0.315058297	-0.74010031	1.368372038	0.071581727	0.003405752	0.603470624	1.056453949	1.726602201	-0.329407333	0.023842473	0.45451733	-0.579132162	0.653262666	1.092857156	0.571095686	-0.380190046	0.439462999	-1.385954264	1.422465003	-0.469675385	-1.757666049	-0.119484771	-0.508057465	0.35105981	-0.976525035	-0.547203211	-0.358313528	0.611662814
GRMZM2G111293	-2.998020796	-2.645701413	-2.468001988	0.531447525	-2.345104662	-2.249880663	0.044289159	-2.171527717	0.167663737	0.944119285	-2.045954276	-1.993601218	-1.946202375	-1.825439172	0.223213218	0.636490883	-1.790524917	-1.757666049	-1.726602201	-1.697120332	-1.616536998	-1.591873889	0.017029548	-1.568142731	0.704730028	-1.545263217	-1.523165155	0.785662535	0.286550499	2.345104662	0.813797671	0.51582268	1.545263217	-1.48107362	-1.460977052	-1.441453795	1.422465003	0.882109877	-0.010217413	0.293654744	0.279460686	-1.403975696	-1.385954264	-1.368372038	-1.351202935	-1.33442315	-1.318010897	0.417065588	0.678771572
GRMZM2G103166	-1.301946185	-0.078412413	-1.286210621	0.531447525	-1.009990169	0.523619123	0.492617885	-0.380190046	-2.998020796	0.722302208	-0.872103029	0.057930049	-0.91267586	-0.023842473	-1.211918765	0.258273739	1.105318189	0.6448541	-0.670220259	0.409646587	0.394875486	-0.09208509	-1.825439172	-0.842592259	1.056453949	-0.731172307	0.09208509	-0.439462999	-0.160759774	0.767246816	1.642224543	0.563095926	0.484942137	1.385954264	-1.240815502	0.587206217	0.098927729	0.195363108	-1.092857156	0.358313528	-0.661717677	-0.258273739	0.83291742	0.547203211	-0.044289159	1.862731867	-0.216235289	-0.153863466	0.508057465
GRMZM2G151979	0.794970891	-0.358313528	-0.380190046	-0.923055543	0.492617885	-0.216235289	-0.265322712	0.160759774	-1.862731867	0.767246816	-0.126347925	0.43197323	0.83291742	-0.085246759	-0.872103029	-0.307908216	2.345104662	-0.402250065	-1.726602201	0.394875486	-1.080563549	1.117953259	-1.993601218	-0.852346618	-0.45451733	-1.184000049	0.223213218	-1.501786817	-1.460977052	-0.174575701	0.852346618	0.071581727	-0.037471962	0.064754379	-0.628171949	1.568142731	0.272384894	-0.563095926	-0.776421761	1.422465003	-0.636490883	-0.387522319	-2.645701413	-1.697120332	0.126347925	-0.167663737	-1.441453795	-0.446977502	1.825439172
GRMZM2G158860	-0.713488578	0.279460686	0.286550499	0.044289159	-0.216235289	0.209267873	0.923055543	-0.272384894	-2.998020796	-0.153863466	-0.611662814	0.258273739	2.645701413	0.153863466	-0.293654744	-0.500322766	-1.092857156	-1.48107362	-1.021399468	0.119484771	-1.545263217	-0.237202109	-1.368372038	-0.417065588	1.591873889	-0.722302208	-1.669043821	0.653262666	-0.998710851	1.501786817	0.439462999	-0.587206217	-0.133217035	-1.616536998	1.48107362	1.044626445	-0.902393588	-0.758136008	2.249880663	0.987557182	-0.547203211	1.946202375	-0.307908216	-0.112627241	1.993601218	1.545263217	0.078412413	-0.174575701	0.45451733
GRMZM2G313481	0.329407333	0.852346618	0.380190046	-0.987557182	-0.882109877	-1.993601218	-0.852346618	0.300773842	0.923055543	0.587206217	0.307908216	0.842592259	-0.336607179	-1.240815502	0.424507616	1.105318189	-0.722302208	0.358313528	-0.387522319	-0.293654744	0.531447525	-0.842592259	-0.579132162	0.704730028	1.501786817	0.315058297	0.446977502	0.965610478	1.117953259	1.993601218	-0.037471962	-1.403975696	0.293654744	-2.345104662	0.417065588	-0.862182757	-0.216235289	0.83291742	0.91267586	0.563095926	0.023842473	0.872103029	1.056453949	0.484942137	2.998020796	0.402250065	-0.119484771	-0.687372812	-0.358313528
GRMZM2G066672	0.394875486	-1.143773961	1.422465003	-0.35105981	-0.469675385	0.265322712	0.380190046	-0.862182757	2.998020796	0.965610478	-2.249880663	-0.119484771	-0.547203211	0.195363108	-1.301946185	-2.345104662	-0.539308633	-1.318010897	0.611662814	-1.032943298	-1.523165155	-1.726602201	0.7490877	-0.636490883	0.492617885	-0.160759774	0.776421761	1.092857156	1.044626445	-0.813797671	0.469675385	-0.43197323	0.954809756	-0.508057465	-0.462083086	0.813797671	-0.064754379	-1.170380633	-1.460977052	0.882109877	-1.33442315	-0.628171949	-0.343824517	-0.365586148	-0.146974467	0.307908216	0.051108415	-0.976525035	1.226239142
GRMZM5G811268	-0.272384894	-2.998020796	-2.645701413	-0.057930049	-0.731172307	0.678771572	-0.882109877	-0.09208509	-2.345104662	0.933535639	-1.130769373	2.345104662	1.080563549	-2.249880663	-0.358313528	-0.987557182	0.731172307	1.318010897	-2.171527717	1.726602201	-2.104600628	-0.687372812	-2.045954276	0.329407333	2.249880663	0.286550499	0.687372812	0.387522319	1.130769373	1.240815502	0.872103029	0.265322712	1.105318189	-0.954809756	-1.946202375	0.119484771	-0.74010031	-0.174575701	1.441453795	-0.051108415	1.092857156	-0.153863466	-0.555132042	-0.439462999	-0.477294855	1.255660378	2.045954276	-0.044289159	1.616536998
GRMZM2G046804	1.068431117	-0.43197323	0.112627241	0.678771572	1.130769373	0.713488578	0.636490883	-0.687372812	1.318010897	-0.409646587	0.202310601	-0.462083086	0.078412413	-0.508057465	-0.064754379	0.892205847	-0.119484771	-0.74010031	-0.595318735	0.358313528	-1.286210621	0.6448541	1.501786817	0.882109877	-0.279460686	0.195363108	1.790524917	0.687372812	1.48107362	1.568142731	2.645701413	1.862731867	1.170380633	0.167663737	0.188425032	0.785662535	-0.892205847	1.351202935	-1.790524917	0.09208509	-2.045954276	-0.160759774	-0.619896262	-1.460977052	-0.237202109	1.044626445	-0.181496015	-0.571095686	0.153863466
GRMZM5G854473	0.758136008	-0.35105981	-0.74010031	0.394875486	1.501786817	-1.021399468	-0.140092436	-0.758136008	1.240815502	1.790524917	1.403975696	0.872103029	0.852346618	-0.987557182	0.531447525	-1.270787244	-0.085246759	-0.603470624	0.336607179	0.057930049	-0.767246816	-0.976525035	0.023842473	-1.523165155	0.223213218	-0.571095686	1.616536998	1.862731867	1.301946185	1.170380633	0.74010031	1.021399468	0.300773842	-0.892205847	1.568142731	0.030656506	-0.380190046	0.611662814	0.619896262	-0.944119285	-1.092857156	-0.636490883	1.422465003	0.439462999	0.209267873	0.713488578	0.587206217	-0.195363108	-1.170380633
GRMZM2G418450	-0.071581727	1.117953259	-1.143773961	-0.09208509	0.174575701	1.422465003	0.954809756	-0.126347925	-0.696025208	1.021399468	-1.697120332	2.249880663	-0.944119285	-1.790524917	0.628171949	-0.188425032	0.064754379	0.587206217	-0.776421761	0.933535639	-1.48107362	0.358313528	-0.872103029	0.500322766	0.83291742	-1.351202935	1.255660378	-1.286210621	0.555132042	0.307908216	-0.492617885	-0.251237576	-0.098927729	0.365586148	0.74010031	1.368372038	-0.023842473	1.790524917	0.188425032	-0.315058297	-1.385954264	-0.387522319	-0.085246759	0.387522319	-0.417065588	1.130769373	-1.545263217	-0.842592259	-0.358313528
GRMZM2G310795	1.460977052	-0.785662535	-0.057930049	0.804348643	1.226239142	1.184000049	1.642224543	-1.523165155	-2.645701413	0.023842473	-0.402250065	1.056453949	0.902393588	0.785662535	-0.477294855	-0.446977502	1.441453795	0.933535639	-1.862731867	1.021399468	0.872103029	1.197842699	-2.045954276	-0.387522319	-1.068431117	-0.307908216	-0.767246816	-1.286210621	-1.591873889	-0.636490883	-0.064754379	0.146974467	-0.628171949	-0.944119285	0.237202109	0.181496015	-0.237202109	0.394875486	-1.080563549	0.188425032	0.322224522	0.484942137	-1.170380633	-0.923055543	0.51582268	-0.09208509	-0.976525035	0.174575701	0.619896262
GRMZM2G160175	0.862182757	0.51582268	0.722302208	-0.862182757	0.731172307	1.009990169	-0.209267873	-0.83291742	2.171527717	-1.422465003	-1.080563549	0.265322712	1.33442315	-0.409646587	0.181496015	-0.315058297	0.74010031	0.661717677	-0.244213829	1.105318189	-0.372878156	-0.51582268	0.813797671	1.044626445	1.211918765	-1.318010897	1.056453949	0.882109877	1.48107362	0.057930049	-0.767246816	0.174575701	1.080563549	-0.704730028	0.842592259	-0.237202109	-1.946202375	1.790524917	1.591873889	1.902810954	-1.301946185	-1.240815502	-0.508057465	0.823319923	-0.7490877	-0.603470624	-0.531447525	0.078412413	-0.462083086
GRMZM2G368890	1.790524917	0.293654744	-0.365586148	-0.140092436	1.117953259	-0.126347925	-1.286210621	0.126347925	2.468001988	-0.343824517	0.119484771	-0.500322766	-1.523165155	-0.862182757	0.998710851	-0.146974467	0.279460686	-0.417065588	0.181496015	1.032943298	0.687372812	0.500322766	-1.385954264	2.045954276	-0.394875486	1.226239142	0.722302208	0.112627241	0.892205847	-0.112627241	-1.170380633	-0.563095926	-1.318010897	1.068431117	0.670220259	-0.987557182	0.146974467	0.160759774	-1.032943298	-0.216235289	-0.902393588	-1.403975696	-0.237202109	-0.74010031	0.098927729	-0.160759774	-2.345104662	-0.336607179	0.547203211
GRMZM2G380457	0.563095926	1.368372038	0.329407333	-0.852346618	0.45451733	0.6448541	0.923055543	-0.670220259	-0.017029548	0.044289159	-1.156974916	1.080563549	0.365586148	0.722302208	-0.696025208	0.713488578	-0.078412413	0.531447525	1.226239142	-0.713488578	-2.998020796	-2.645701413	0.842592259	1.021399468	1.286210621	-0.286550499	-0.882109877	0.555132042	0.523619123	1.523165155	-2.468001988	0.852346618	0.976525035	-0.477294855	-0.126347925	-0.223213218	-0.085246759	2.345104662	0.202310601	0.477294855	-1.032943298	0.126347925	-0.387522319	-2.345104662	-0.307908216	1.318010897	0.446977502	-1.385954264	0.105775004
[truncated: 248 more columns]
