# Supplementary material for: Verification of Three-Phase Dependency Analysis Bayesian Network Learning Method for Maize Carotenoid Gene Mining
Source: Biomed Res Int. 2017 Jul 30;2017:1813494. doi: 10.1155/2017/1813494 (PMC5554554; doi:10.1155/2017/1813494)
Supplement: Supplementary file 1 — The experiment data 1 of 109 nodes, the experiment data 2 of 109 nodes, and so on are shown here. [file 1813494.f1.zip › Supplementary material/Gene100_5.csv]

V1	V2	V3	V4	V5	V6	V7	V8	V9	V10	V11	V12	V13	V14	V15	V16	V17	V18	V19	V20	V21	V22	V23	V24	V25	V26	V27	V28	V29	V30	V31	V32	V33	V34	V35	V36	V37	V38	V39	V40	V41	V42	V43	V44	V45	V46	V47	V48	V49	V50
GRMZM2G487197	-0.83291742	0.45451733	0.329407333	-0.181496015	-0.670220259	1.197842699	-0.571095686	-0.611662814	0.09208509	-0.804348643	-1.33442315	0.394875486	-1.184000049	1.368372038	-0.842592259	0.223213218	-0.6448541	-0.923055543	0.402250065	-0.244213829	-0.343824517	0.539308633	-0.064754379	-0.713488578	0.722302208	-0.555132042	-1.48107362	1.021399468	0.188425032	0.74010031	1.501786817	-0.372878156	-0.153863466	-0.265322712	-1.286210621	1.33442315	0.293654744	-0.112627241	1.130769373	-0.09208509	-1.422465003	-0.439462999	-0.329407333	-0.767246816	-0.603470624	0.265322712	0.446977502	0.153863466	-1.318010897
GRMZM2G063806	0.731172307	-0.794970891	-0.678771572	0.653262666	0.661717677	0.804348643	-0.417065588	-0.017029548	-2.998020796	0.446977502	0.003405752	1.545263217	0.785662535	-0.611662814	-0.547203211	0.587206217	1.669043821	0.944119285	-0.998710851	0.776421761	-0.500322766	0.882109877	-1.726602201	0.424507616	-0.044289159	-0.023842473	0.7490877	-1.862731867	0.044289159	-0.43197323	0.105775004	1.385954264	-0.098927729	-0.965610478	0.439462999	0.696025208	0.500322766	-1.240815502	-0.902393588	0.010217413	-0.293654744	-1.255660378	-1.351202935	-1.197842699	-0.555132042	-0.126347925	-0.944119285	-0.579132162	-1.092857156
GRMZM2G589821	0.237202109	1.545263217	-0.071581727	-0.223213218	0.051108415	0.037471962	-0.140092436	-0.051108415	-2.998020796	1.318010897	-0.976525035	2.171527717	1.197842699	-0.902393588	0.758136008	-0.202310601	0.409646587	-0.987557182	-2.645701413	1.080563549	-0.678771572	-1.009990169	-0.251237576	-1.105318189	-2.468001988	0.098927729	0.402250065	-0.571095686	-1.48107362	-1.270787244	0.174575701	-0.687372812	-0.409646587	-0.636490883	0.300773842	1.862731867	0.902393588	-2.345104662	-0.731172307	-0.160759774	0.531447525	-0.216235289	-2.249880663	1.501786817	0.017029548	1.105318189	-0.244213829	-1.032943298	0.358313528
GRMZM2G043636	0.555132042	0.83291742	-2.998020796	0.954809756	0.258273739	-2.645701413	1.368372038	0.030656506	-2.249880663	1.117953259	-0.057930049	1.48107362	-0.343824517	1.301946185	-2.171527717	-2.104600628	-2.045954276	-0.216235289	1.642224543	0.687372812	1.156974916	-0.462083086	-1.993601218	-0.119484771	0.619896262	-0.181496015	-0.293654744	0.477294855	-1.946202375	0.51582268	0.823319923	0.272384894	0.424507616	0.785662535	-0.539308633	-1.902810954	-0.003405752	0.230202032	1.270787244	1.902810954	1.170380633	-1.862731867	0.794970891	-1.825439172	0.380190046	-0.315058297	-1.790524917	1.757666049	0.758136008
GRMZM2G055698	0.126347925	-0.244213829	-0.687372812	-0.862182757	-0.83291742	-0.852346618	1.286210621	-1.286210621	1.790524917	-1.270787244	-0.037471962	1.056453949	2.998020796	-0.484942137	0.731172307	1.825439172	0.064754379	0.380190046	1.068431117	0.181496015	-0.933535639	-0.508057465	0.852346618	-1.385954264	0.409646587	-1.523165155	-0.51582268	0.603470624	1.092857156	1.211918765	-1.117953259	-0.523619123	0.051108415	-2.171527717	-0.965610478	-0.492617885	-0.078412413	0.91267586	2.345104662	0.670220259	-0.882109877	-0.044289159	0.078412413	-0.329407333	-0.146974467	1.523165155	0.279460686	0.74010031	-0.112627241
GRMZM2G134694	1.697120332	-0.555132042	-0.387522319	0.998710851	0.051108415	2.045954276	-0.83291742	0.687372812	-1.616536998	-0.160759774	-0.563095926	1.790524917	-1.184000049	0.064754379	0.244213829	-0.037471962	1.33442315	1.501786817	-0.571095686	0.329407333	-0.140092436	0.902393588	-0.882109877	0.7490877	0.696025208	0.74010031	1.130769373	-2.045954276	0.670220259	-0.484942137	-0.823319923	1.460977052	-0.085246759	-0.804348643	0.279460686	1.441453795	1.318010897	-1.056453949	-1.009990169	-0.500322766	-0.43197323	-1.226239142	-1.545263217	-1.105318189	0.09208509	-0.216235289	-0.126347925	-1.286210621	-0.704730028
GRMZM2G402307	1.501786817	-0.057930049	-0.322224522	0.174575701	0.126347925	1.032943298	0.380190046	1.056453949	-2.468001988	0.402250065	-0.636490883	0.923055543	-0.45451733	-0.653262666	-1.032943298	0.417065588	0.044289159	0.91267586	-0.7490877	0.933535639	0.057930049	1.48107362	-1.825439172	0.188425032	0.216235289	-0.965610478	-0.446977502	-1.211918765	0.653262666	-0.976525035	1.197842699	0.758136008	-0.731172307	-0.603470624	-0.258273739	2.171527717	1.441453795	-0.661717677	-0.785662535	1.143773961	-0.272384894	-0.279460686	-1.697120332	-1.130769373	0.862182757	0.202310601	-0.492617885	-0.902393588	-0.417065588
GRMZM2G105436	0.146974467	-0.409646587	-0.539308633	0.329407333	-0.687372812	-0.7490877	0.944119285	-0.595318735	2.045954276	0.933535639	-0.188425032	-0.74010031	-0.804348643	-0.078412413	-0.767246816	0.037471962	2.998020796	0.380190046	-1.460977052	0.678771572	-2.249880663	-0.523619123	0.7490877	-0.954809756	0.315058297	0.230202032	-0.933535639	1.523165155	1.044626445	1.240815502	1.591873889	1.105318189	1.568142731	-0.555132042	-1.523165155	0.508057465	1.255660378	-0.852346618	-0.380190046	0.336607179	-0.35105981	-0.098927729	0.417065588	0.112627241	1.403975696	0.998710851	-0.293654744	0.300773842	0.477294855
GRMZM2G377079	0.237202109	-0.09208509	-1.48107362	-0.923055543	0.555132042	0.258273739	-2.045954276	0.508057465	-1.301946185	-0.126347925	-0.216235289	1.545263217	1.184000049	-0.813797671	-0.160759774	-0.462083086	0.315058297	-0.500322766	-1.056453949	-0.251237576	-0.6448541	-0.872103029	-1.130769373	-0.531447525	0.813797671	0.209267873	-0.823319923	-1.523165155	-0.653262666	-0.944119285	0.112627241	0.704730028	-0.336607179	0.603470624	-0.628171949	0.098927729	1.616536998	-0.409646587	1.226239142	0.336607179	-1.286210621	0.409646587	1.460977052	-0.785662535	-0.195363108	0.307908216	-1.117953259	-0.670220259	1.403975696
GRMZM2G011357	0.126347925	0.424507616	-0.126347925	0.842592259	-0.469675385	-0.965610478	-0.394875486	-0.804348643	-0.119484771	-1.301946185	-0.477294855	-0.571095686	0.579132162	-2.645701413	-0.892205847	-0.944119285	-0.307908216	-2.468001988	0.307908216	-0.43197323	-2.345104662	0.112627241	-0.862182757	-0.678771572	0.322224522	-1.156974916	-0.167663737	1.993601218	0.74010031	0.044289159	0.611662814	0.619896262	0.394875486	-2.249880663	-0.91267586	-0.713488578	-0.336607179	-1.441453795	0.758136008	-0.230202032	-1.044626445	-0.181496015	-0.539308633	1.385954264	2.345104662	0.587206217	-0.767246816	-0.523619123	0.300773842
GRMZM2G100741	-0.902393588	1.240815502	-0.852346618	-1.170380633	0.882109877	-1.441453795	0.539308633	-0.343824517	-1.757666049	1.591873889	-0.387522319	0.119484771	-0.293654744	-1.523165155	-0.933535639	-1.697120332	-0.307908216	0.380190046	0.776421761	0.74010031	0.469675385	-0.51582268	-2.345104662	-1.545263217	1.226239142	-0.181496015	-1.591873889	-0.174575701	-1.385954264	1.825439172	0.071581727	-0.713488578	-0.804348643	1.044626445	-0.661717677	0.767246816	-0.758136008	1.197842699	1.460977052	0.037471962	1.385954264	0.842592259	0.823319923	0.209267873	-0.105775004	0.188425032	0.51582268	1.092857156	-0.209267873
GRMZM2G343139	-0.181496015	-0.794970891	-0.477294855	1.33442315	1.351202935	1.757666049	1.825439172	0.882109877	-0.83291742	-0.098927729	-0.133217035	0.902393588	-0.307908216	1.368372038	1.170380633	0.293654744	2.104600628	1.669043821	-1.825439172	-0.785662535	-1.545263217	-0.300773842	0.51582268	-2.468001988	-0.424507616	-0.579132162	-0.402250065	-0.078412413	0.713488578	0.628171949	0.987557182	1.044626445	-1.318010897	0.35105981	-0.336607179	0.010217413	-1.726602201	-0.365586148	0.722302208	0.484942137	-0.146974467	1.523165155	-1.48107362	-0.823319923	2.045954276	0.272384894	0.758136008	-0.603470624	-1.697120332
GRMZM2G000380	-0.057930049	1.130769373	0.09208509	0.439462999	-1.009990169	-0.484942137	-0.230202032	-1.862731867	0.661717677	-1.757666049	0.852346618	-0.547203211	0.216235289	-1.946202375	-0.462083086	-0.987557182	-0.469675385	-0.244213829	-2.998020796	-0.372878156	-0.523619123	-2.645701413	-0.181496015	-0.954809756	-0.539308633	-0.064754379	-1.318010897	-1.226239142	-1.422465003	-1.460977052	-1.902810954	-1.068431117	-0.126347925	-1.080563549	-0.417065588	-1.240815502	-0.35105981	1.117953259	-0.670220259	1.385954264	-0.140092436	0.687372812	2.468001988	1.270787244	1.044626445	0.954809756	-1.642224543	-0.713488578	-0.902393588
GRMZM2G119265	1.616536998	0.237202109	0.51582268	1.697120332	-0.307908216	-0.223213218	-0.852346618	-0.998710851	0.387522319	-0.579132162	1.403975696	-0.112627241	-0.244213829	0.181496015	-0.336607179	-1.351202935	-1.403975696	-1.092857156	0.230202032	-0.394875486	0.336607179	-0.51582268	0.195363108	1.545263217	1.523165155	1.032943298	-0.965610478	1.270787244	1.197842699	0.571095686	0.064754379	0.469675385	-0.74010031	-0.661717677	0.078412413	0.402250065	0.09208509	1.044626445	1.568142731	1.385954264	-0.508057465	-0.300773842	-2.345104662	-1.591873889	-0.944119285	-0.628171949	-1.757666049	0.372878156	0.140092436
GRMZM2G149335	0.372878156	0.380190046	0.587206217	0.794970891	0.776421761	-0.547203211	0.085246759	-0.758136008	2.998020796	0.417065588	0.35105981	1.240815502	1.460977052	-0.91267586	-0.794970891	-1.009990169	-0.687372812	-1.523165155	-1.351202935	-1.270787244	0.216235289	-0.74010031	0.500322766	-0.265322712	1.616536998	0.944119285	0.954809756	0.523619123	1.080563549	0.508057465	1.385954264	0.258273739	0.619896262	-0.160759774	0.45451733	-0.670220259	-0.188425032	2.045954276	0.307908216	0.628171949	-1.092857156	0.051108415	1.403975696	0.402250065	1.993601218	-0.424507616	-0.661717677	-0.477294855	0.251237576
GRMZM2G361842	0.372878156	1.156974916	0.380190046	0.653262666	1.501786817	0.003405752	-0.462083086	-0.563095926	-0.678771572	-0.279460686	-0.998710851	0.696025208	-0.251237576	0.713488578	-0.380190046	-1.669043821	-0.394875486	0.071581727	0.469675385	1.946202375	1.286210621	0.286550499	1.056453949	-0.223213218	0.563095926	0.43197323	-0.195363108	-0.417065588	0.477294855	1.368372038	1.255660378	1.902810954	0.167663737	-0.704730028	-0.794970891	0.446977502	-1.184000049	-0.230202032	0.965610478	1.226239142	-1.441453795	-0.174575701	0.140092436	-1.197842699	0.146974467	0.223213218	1.403975696	1.301946185	0.202310601
GRMZM2G130739	2.468001988	-1.156974916	-0.628171949	0.611662814	0.43197323	1.056453949	-0.670220259	0.265322712	-2.998020796	0.785662535	-0.146974467	1.862731867	-0.119484771	0.439462999	-0.244213829	0.167663737	1.130769373	2.249880663	-0.417065588	1.422465003	0.571095686	0.882109877	-1.080563549	1.105318189	-0.258273739	0.595318735	1.460977052	-1.726602201	-0.030656506	-0.678771572	-0.365586148	0.804348643	0.322224522	-1.48107362	0.329407333	0.45451733	1.790524917	-1.422465003	-0.7490877	-0.216235289	0.09208509	-1.021399468	-1.545263217	-0.813797671	0.987557182	-0.098927729	-0.43197323	-0.078412413	0.279460686
GRMZM2G356142	0.923055543	-0.813797671	-0.579132162	0.571095686	-0.112627241	1.032943298	-0.794970891	0.7490877	-1.403975696	-0.380190046	-0.523619123	0.387522319	-1.032943298	0.030656506	0.372878156	0.078412413	0.322224522	-0.563095926	-0.223213218	0.776421761	-0.085246759	0.539308633	-0.010217413	0.731172307	-0.365586148	1.044626445	0.872103029	-1.385954264	-0.286550499	-1.211918765	-0.500322766	0.003405752	0.105775004	-1.056453949	-0.167663737	1.33442315	0.140092436	0.477294855	-0.153863466	0.336607179	-0.722302208	-1.170380633	-2.998020796	-2.045954276	0.653262666	-0.140092436	0.098927729	-0.251237576	-0.195363108
GRMZM2G158736	-0.933535639	0.611662814	0.112627241	1.993601218	0.037471962	-0.7490877	-2.998020796	-1.270787244	-2.468001988	-0.43197323	-0.051108415	1.757666049	-0.380190046	-2.345104662	0.722302208	1.170380633	-1.255660378	-0.587206217	-0.085246759	-2.249880663	-2.171527717	0.064754379	-0.767246816	0.83291742	-2.104600628	0.954809756	1.240815502	-0.653262666	0.202310601	-1.117953259	-0.133217035	-0.83291742	2.104600628	-0.484942137	-0.064754379	-0.661717677	0.555132042	-0.387522319	-0.188425032	0.713488578	-0.071581727	1.080563549	-2.045954276	-1.993601218	0.678771572	0.6448541	0.539308633	-0.105775004	1.068431117
GRMZM2G010933	0.902393588	0.500322766	-1.790524917	-1.080563549	-0.023842473	-1.211918765	0.098927729	0.064754379	0.251237576	1.591873889	0.767246816	-0.017029548	0.508057465	-0.402250065	0.531447525	0.237202109	1.669043821	0.882109877	-0.976525035	-0.336607179	-0.6448541	-1.591873889	1.270787244	0.563095926	1.197842699	-0.071581727	-2.171527717	0.704730028	0.322224522	1.368372038	0.862182757	0.195363108	0.417065588	0.336607179	-0.09208509	-0.146974467	1.441453795	1.255660378	-0.758136008	0.813797671	-2.249880663	0.085246759	0.343824517	0.965610478	1.460977052	1.080563549	0.462083086	0.037471962	1.301946185
GRMZM2G125095	0.160759774	-2.998020796	-0.300773842	-0.329407333	-2.645701413	1.946202375	-0.064754379	0.078412413	0.003405752	-0.322224522	0.365586148	0.230202032	0.35105981	-0.230202032	0.044289159	-2.249880663	1.286210621	1.117953259	2.345104662	-0.119484771	-2.171527717	-2.104600628	0.167663737	-0.223213218	0.336607179	0.133217035	0.244213829	1.092857156	2.104600628	-2.045954276	-0.469675385	0.636490883	0.181496015	-0.417065588	-0.387522319	-0.492617885	-0.112627241	-1.993601218	0.933535639	0.439462999	0.563095926	-1.946202375	1.591873889	0.687372812	0.195363108	0.030656506	-0.6448541	0.579132162	0.45451733
GRMZM5G872141	-1.422465003	1.993601218	0.230202032	1.697120332	0.307908216	-1.616536998	0.300773842	-1.862731867	-1.301946185	-0.804348643	-1.790524917	0.439462999	2.468001988	0.078412413	-1.697120332	-0.071581727	-0.477294855	-1.156974916	1.422465003	-0.140092436	-0.469675385	-1.825439172	0.902393588	0.153863466	1.170380633	-0.258273739	0.251237576	0.823319923	0.023842473	-0.758136008	-0.003405752	0.380190046	-0.307908216	-0.547203211	-0.595318735	-0.731172307	-0.43197323	0.539308633	0.713488578	1.862731867	-0.722302208	0.872103029	-0.965610478	-0.380190046	0.209267873	0.944119285	-0.45451733	-0.017029548	-0.587206217
GRMZM2G029868	1.591873889	1.790524917	-0.105775004	2.045954276	-1.092857156	0.547203211	-0.6448541	0.446977502	-2.104600628	0.794970891	1.902810954	1.946202375	-0.010217413	-0.358313528	0.508057465	-0.402250065	0.153863466	0.140092436	1.318010897	0.954809756	1.669043821	1.255660378	-0.579132162	0.823319923	-0.409646587	1.757666049	-0.315058297	-0.636490883	0.216235289	0.758136008	1.032943298	1.697120332	0.477294855	0.492617885	1.48107362	1.862731867	0.126347925	-0.223213218	-0.112627241	1.068431117	-0.998710851	0.7490877	0.230202032	0.202310601	0.531447525	-0.017029548	-1.170380633	-0.842592259	0.181496015
AC234152.1_FG005	-0.105775004	-0.402250065	-0.813797671	1.184000049	-0.902393588	-0.7490877	-0.188425032	0.424507616	-2.645701413	-0.380190046	0.09208509	0.965610478	-0.603470624	-0.315058297	0.661717677	-2.345104662	-0.265322712	-0.167663737	-2.249880663	0.628171949	-0.195363108	-0.387522319	-0.91267586	1.568142731	0.439462999	1.460977052	0.202310601	-0.794970891	0.823319923	-0.446977502	-0.153863466	-0.037471962	-0.35105981	0.085246759	0.862182757	2.045954276	1.009990169	-1.993601218	-0.713488578	-0.758136008	0.343824517	0.976525035	-1.946202375	-1.902810954	0.195363108	1.255660378	-1.862731867	-0.636490883	-1.825439172
GRMZM2G100524	2.249880663	0.872103029	0.35105981	1.044626445	-0.902393588	-0.462083086	1.757666049	-0.160759774	1.48107362	1.270787244	0.603470624	1.726602201	1.068431117	-0.315058297	-0.195363108	-0.417065588	-0.446977502	0.133217035	-0.126347925	0.7490877	1.642224543	-1.117953259	0.044289159	0.09208509	2.345104662	-0.587206217	-0.119484771	1.545263217	1.240815502	0.153863466	-1.697120332	-0.603470624	-0.998710851	-2.998020796	0.023842473	-0.343824517	-2.645701413	0.965610478	-0.409646587	-0.563095926	-1.403975696	-0.237202109	-0.030656506	0.105775004	0.286550499	-0.265322712	-1.318010897	0.098927729	0.842592259
GRMZM2G138589	-0.477294855	-1.021399468	1.021399468	0.402250065	0.216235289	-1.009990169	1.545263217	0.223213218	1.501786817	-0.078412413	-1.501786817	1.301946185	-0.944119285	-1.351202935	-1.757666049	-1.403975696	-0.098927729	-0.343824517	0.446977502	1.032943298	-0.74010031	-1.156974916	0.484942137	-1.697120332	0.571095686	0.976525035	-0.424507616	-0.085246759	0.372878156	-0.174575701	0.892205847	0.188425032	0.902393588	-2.998020796	-0.153863466	0.037471962	0.704730028	0.146974467	0.409646587	-0.265322712	-0.010217413	0.003405752	1.669043821	-0.785662535	-0.417065588	0.965610478	-0.862182757	-0.45451733	-0.146974467
GRMZM2G063533	-1.032943298	0.365586148	0.628171949	0.153863466	-0.272384894	-0.343824517	0.611662814	-2.645701413	0.785662535	-1.669043821	-0.83291742	-0.010217413	1.080563549	-0.731172307	-0.492617885	0.678771572	-1.092857156	0.030656506	-0.500322766	-0.279460686	-1.226239142	-1.156974916	-0.758136008	-0.595318735	1.270787244	0.251237576	-0.307908216	0.976525035	-0.713488578	0.402250065	-1.403975696	-1.523165155	0.112627241	-1.642224543	0.167663737	0.508057465	-0.872103029	1.184000049	0.987557182	0.823319923	0.539308633	0.181496015	0.944119285	1.130769373	1.501786817	1.523165155	-0.174575701	-1.441453795	0.547203211
GRMZM2G129019	-2.468001988	1.441453795	-0.293654744	1.092857156	0.174575701	-1.403975696	0.523619123	-1.862731867	-2.249880663	-0.394875486	-1.240815502	0.678771572	2.468001988	-0.670220259	-2.171527717	-0.767246816	-1.068431117	0.057930049	0.628171949	0.933535639	-0.343824517	-1.501786817	0.83291742	-0.174575701	-0.439462999	-0.315058297	-0.133217035	0.037471962	-0.531447525	-0.336607179	0.133217035	0.105775004	0.071581727	-1.080563549	-0.882109877	0.484942137	0.539308633	0.417065588	2.045954276	1.184000049	-0.987557182	1.993601218	-0.044289159	1.056453949	1.33442315	-0.209267873	-0.469675385	-0.462083086	1.080563549
GRMZM2G116517	-1.545263217	-0.202310601	0.409646587	-0.307908216	-0.74010031	-1.422465003	0.563095926	-0.579132162	-2.171527717	-0.119484771	-0.944119285	0.057930049	-0.010217413	0.064754379	-0.804348643	-1.056453949	-1.523165155	-1.021399468	0.776421761	-0.322224522	-0.09208509	-0.852346618	0.195363108	-0.872103029	0.372878156	-1.993601218	-1.669043821	1.591873889	0.209267873	1.790524917	1.368372038	0.051108415	0.794970891	1.825439172	-0.547203211	0.017029548	0.322224522	-0.181496015	-0.823319923	-0.315058297	0.51582268	-1.697120332	0.842592259	0.300773842	-0.587206217	0.307908216	0.758136008	0.343824517	0.892205847
GRMZM2G046472	-0.852346618	0.469675385	-0.563095926	-0.531447525	-0.595318735	-1.403975696	1.48107362	-1.255660378	-1.642224543	-0.477294855	-0.704730028	-0.653262666	-0.126347925	-0.670220259	-0.722302208	0.216235289	-1.170380633	-0.902393588	0.51582268	1.009990169	-0.776421761	-0.146974467	0.492617885	-0.933535639	-0.872103029	0.202310601	-0.336607179	1.441453795	-1.790524917	1.946202375	1.286210621	0.462083086	-1.105318189	1.056453949	-1.523165155	-0.687372812	-1.068431117	-0.174575701	0.195363108	-0.223213218	-1.301946185	0.722302208	2.171527717	1.301946185	0.223213218	2.345104662	0.329407333	-0.862182757	0.804348643
GRMZM5G878913	1.993601218	0.587206217	0.017029548	0.579132162	0.286550499	-0.523619123	-0.223213218	-0.555132042	-1.441453795	0.555132042	1.197842699	0.862182757	1.726602201	0.51582268	1.270787244	-0.126347925	0.300773842	-0.343824517	-0.003405752	0.140092436	0.477294855	0.251237576	0.037471962	1.441453795	1.862731867	0.852346618	0.272384894	0.872103029	1.130769373	0.74010031	1.240815502	1.902810954	0.944119285	0.508057465	-0.636490883	-0.315058297	0.394875486	0.380190046	-0.923055543	-0.424507616	-1.48107362	-0.687372812	-1.545263217	-1.068431117	-0.976525035	1.545263217	1.092857156	0.133217035	0.265322712
GRMZM2G113549	-0.628171949	1.021399468	0.571095686	0.409646587	-1.642224543	-2.249880663	1.143773961	-0.987557182	1.056453949	0.696025208	-0.653262666	-0.09208509	2.998020796	-1.021399468	-1.117953259	-0.661717677	0.030656506	-0.83291742	0.244213829	-0.365586148	-0.965610478	-1.422465003	0.017029548	-0.230202032	2.045954276	-0.508057465	-0.842592259	1.568142731	0.402250065	0.923055543	-0.954809756	-0.394875486	0.508057465	-0.071581727	0.976525035	-0.272384894	-0.017029548	-0.140092436	1.170380633	0.237202109	-0.315058297	-0.547203211	1.790524917	0.731172307	1.993601218	-0.188425032	-0.174575701	1.197842699	0.105775004
GRMZM2G303993	-1.197842699	0.892205847	0.661717677	-2.998020796	-0.293654744	-0.078412413	0.944119285	-0.500322766	-0.555132042	0.45451733	-2.645701413	0.923055543	1.080563549	-0.329407333	-0.336607179	-0.670220259	0.469675385	-0.098927729	-0.813797671	1.286210621	1.501786817	-0.160759774	0.394875486	0.223213218	1.270787244	-0.722302208	-2.468001988	-0.611662814	-2.345104662	1.726602201	-0.003405752	-0.380190046	-0.823319923	0.462083086	0.731172307	-0.181496015	0.188425032	2.104600628	-0.6448541	-0.872103029	-0.785662535	-0.195363108	0.195363108	-1.105318189	-0.91267586	2.468001988	2.045954276	1.226239142	0.704730028
GRMZM2G474211	-0.892205847	0.670220259	0.365586148	-0.91267586	-0.484942137	1.460977052	-0.146974467	-0.336607179	-0.661717677	0.603470624	-0.696025208	-2.998020796	-2.645701413	-0.372878156	-0.619896262	-2.345104662	0.704730028	0.813797671	-0.785662535	0.636490883	-0.579132162	0.417065588	0.119484771	-0.160759774	-0.722302208	-0.767246816	1.545263217	0.571095686	1.226239142	0.492617885	1.790524917	0.823319923	0.358313528	-0.563095926	-1.044626445	1.757666049	-0.731172307	-0.713488578	-0.477294855	1.301946185	0.611662814	-0.954809756	0.030656506	-0.500322766	0.804348643	0.09208509	0.071581727	-0.044289159	1.130769373
GRMZM2G113174	2.468001988	-0.380190046	-0.216235289	0.336607179	1.441453795	1.523165155	-0.300773842	-0.555132042	-2.171527717	0.758136008	-0.539308633	0.933535639	-0.195363108	-0.794970891	0.098927729	-0.315058297	1.568142731	0.965610478	-1.403975696	0.882109877	-0.492617885	1.669043821	-1.993601218	1.48107362	0.078412413	-0.91267586	-0.202310601	-1.669043821	0.044289159	-0.051108415	0.343824517	0.563095926	-0.387522319	-0.279460686	0.508057465	1.044626445	0.417065588	-1.009990169	-0.469675385	0.902393588	-0.372878156	-0.785662535	-0.74010031	-0.030656506	0.265322712	0.064754379	-1.105318189	-0.35105981	-0.804348643
GRMZM2G569948	1.501786817	0.531447525	0.842592259	-0.003405752	0.424507616	-0.523619123	1.422465003	-0.852346618	2.645701413	0.279460686	-0.636490883	1.403975696	2.468001988	-0.696025208	-0.023842473	0.933535639	-0.628171949	-0.098927729	1.197842699	-1.642224543	-1.270787244	-1.351202935	-0.030656506	-0.823319923	0.83291742	-0.085246759	0.628171949	0.119484771	1.032943298	1.757666049	0.098927729	-0.343824517	1.170380633	-1.993601218	0.998710851	0.954809756	-1.056453949	0.555132042	1.946202375	0.653262666	-2.104600628	-0.409646587	0.037471962	-0.112627241	1.441453795	-0.539308633	-0.933535639	-0.244213829	-0.661717677
GRMZM2G116971	-0.010217413	0.653262666	-0.153863466	0.105775004	-0.057930049	0.976525035	0.387522319	-1.48107362	-2.998020796	-1.032943298	-0.882109877	0.872103029	0.230202032	0.587206217	-1.460977052	-0.776421761	1.351202935	0.902393588	0.064754379	0.571095686	-1.33442315	-1.240815502	-1.642224543	-0.35105981	-0.181496015	-0.944119285	-0.477294855	-0.603470624	1.009990169	0.882109877	2.345104662	-0.842592259	-0.098927729	-1.318010897	-0.611662814	-0.424507616	-0.439462999	1.056453949	0.813797671	0.767246816	-0.653262666	-0.244213829	0.394875486	-0.105775004	0.439462999	0.603470624	-0.862182757	0.098927729	0.954809756
GRMZM2G300816	1.460977052	-2.998020796	-0.343824517	-0.687372812	1.545263217	0.794970891	-0.636490883	0.563095926	-1.080563549	2.998020796	1.092857156	1.591873889	1.105318189	-0.112627241	0.167663737	0.508057465	1.032943298	-0.085246759	-1.422465003	0.731172307	0.653262666	1.33442315	-1.143773961	-0.45451733	-0.976525035	-2.645701413	-1.403975696	-0.216235289	-1.184000049	1.255660378	1.130769373	0.987557182	1.351202935	-0.500322766	-1.286210621	1.946202375	0.670220259	0.195363108	-0.987557182	-0.704730028	0.571095686	-0.244213829	-0.767246816	-0.146974467	0.223213218	-0.003405752	-0.188425032	0.636490883	-0.696025208
GRMZM2G150201	-1.591873889	0.153863466	-0.492617885	-1.240815502	-0.91267586	0.531447525	0.272384894	-0.078412413	-2.998020796	-0.085246759	-2.045954276	-0.687372812	0.237202109	0.35105981	-1.862731867	-1.068431117	-0.209267873	0.998710851	0.965610478	0.322224522	0.424507616	1.286210621	-2.171527717	-1.825439172	0.064754379	-0.785662535	-0.508057465	-1.197842699	-0.653262666	0.112627241	0.813797671	-0.365586148	-0.112627241	-0.43197323	-0.804348643	0.767246816	0.872103029	0.223213218	0.776421761	-0.119484771	-0.030656506	0.508057465	-0.555132042	-1.117953259	0.661717677	-0.944119285	-1.170380633	-1.403975696	0.687372812
GRMZM2G348846	-0.852346618	0.555132042	-0.336607179	0.611662814	0.595318735	-0.279460686	0.722302208	-1.545263217	1.48107362	-0.35105981	0.776421761	-0.555132042	0.628171949	0.508057465	1.211918765	1.044626445	-0.380190046	0.030656506	0.944119285	0.051108415	-1.48107362	-0.619896262	0.380190046	0.307908216	0.329407333	1.156974916	-1.616536998	0.017029548	-1.757666049	0.469675385	-0.462083086	0.105775004	0.209267873	-0.195363108	0.785662535	-0.078412413	-1.130769373	-0.500322766	0.251237576	0.140092436	-0.409646587	-0.119484771	-1.902810954	-0.842592259	-1.642224543	0.160759774	-1.862731867	0.670220259	0.500322766
GRMZM2G082976	-2.468001988	0.307908216	0.343824517	1.545263217	0.43197323	-1.757666049	-2.645701413	-0.902393588	-1.460977052	0.704730028	-1.143773961	-0.105775004	-0.439462999	0.286550499	0.628171949	-0.731172307	-1.523165155	-1.130769373	0.852346618	0.051108415	0.010217413	-0.91267586	0.804348643	-0.619896262	-1.092857156	-1.021399468	-1.286210621	0.202310601	-1.501786817	0.492617885	1.368372038	-0.862182757	-0.202310601	0.998710851	-0.258273739	-1.270787244	-0.017029548	2.045954276	-0.216235289	-0.923055543	0.409646587	-1.368372038	1.270787244	1.422465003	-0.636490883	-0.010217413	1.226239142	0.469675385	1.184000049
GRMZM2G139691	-0.661717677	0.279460686	-0.258273739	-0.563095926	0.484942137	-0.010217413	1.545263217	-1.117953259	-2.345104662	0.813797671	-0.998710851	1.080563549	0.776421761	0.446977502	-0.417065588	-0.603470624	0.237202109	0.003405752	-0.862182757	0.098927729	-0.237202109	-0.003405752	-1.385954264	-1.143773961	0.146974467	-0.322224522	-0.265322712	-0.923055543	-0.611662814	0.202310601	1.270787244	-1.226239142	-0.555132042	0.174575701	-0.776421761	0.579132162	-0.628171949	0.687372812	0.380190046	0.611662814	0.209267873	1.170380633	0.7490877	0.976525035	0.188425032	1.226239142	0.140092436	-0.636490883	0.492617885
GRMZM2G456568	1.460977052	-0.030656506	-0.140092436	-0.078412413	0.998710851	1.697120332	0.402250065	-0.112627241	-2.345104662	0.010217413	0.923055543	1.240815502	0.7490877	0.563095926	-0.785662535	0.071581727	0.098927729	-0.223213218	-1.032943298	-1.184000049	-0.160759774	1.33442315	-0.882109877	0.933535639	1.009990169	0.023842473	-0.003405752	-1.211918765	-2.468001988	-1.385954264	-0.571095686	0.365586148	-0.469675385	-0.923055543	0.43197323	2.249880663	-0.237202109	-0.823319923	1.790524917	1.422465003	-0.265322712	0.902393588	-1.616536998	-0.944119285	0.862182757	0.696025208	-1.170380633	-0.071581727	-1.270787244
GRMZM2G003225	1.568142731	0.7490877	-0.133217035	0.722302208	0.010217413	-0.09208509	0.794970891	1.021399468	-2.998020796	1.616536998	-0.500322766	0.09208509	0.017029548	-0.508057465	0.998710851	-1.130769373	1.255660378	0.343824517	-0.174575701	2.104600628	-1.318010897	-0.74010031	-1.068431117	1.301946185	-0.713488578	-0.776421761	-1.056453949	-0.539308633	-0.265322712	-0.064754379	0.661717677	0.174575701	-0.315058297	-1.092857156	0.167663737	1.862731867	1.591873889	-2.468001988	-0.619896262	0.767246816	-1.255660378	0.307908216	-1.184000049	-0.078412413	-0.7490877	0.670220259	-0.603470624	-1.156974916	-0.653262666
GRMZM2G168807	1.170380633	-0.571095686	0.202310601	0.852346618	-0.555132042	-0.409646587	-0.636490883	-1.197842699	2.468001988	-0.181496015	0.409646587	0.439462999	-1.105318189	-2.104600628	-1.460977052	0.696025208	0.704730028	-0.531447525	-1.825439172	0.74010031	-1.669043821	-1.130769373	0.209267873	0.003405752	1.757666049	0.188425032	-0.842592259	0.023842473	-0.477294855	-0.813797671	-1.092857156	0.251237576	-0.523619123	0.394875486	0.43197323	-1.523165155	-1.068431117	0.030656506	-1.255660378	0.293654744	-0.492617885	-1.240815502	-0.133217035	-0.696025208	0.372878156	1.48107362	-0.603470624	0.358313528	-0.628171949
GRMZM2G017584	-0.010217413	-0.611662814	-0.954809756	-0.758136008	1.403975696	-0.188425032	-0.343824517	0.098927729	-2.645701413	-1.156974916	-1.092857156	0.265322712	-1.032943298	0.017029548	-0.539308633	-0.307908216	-0.987557182	-0.09208509	1.021399468	0.704730028	-2.171527717	1.068431117	0.477294855	-0.023842473	0.078412413	1.757666049	0.037471962	-0.804348643	-0.140092436	0.636490883	-0.300773842	0.202310601	0.010217413	-0.933535639	-0.329407333	2.345104662	0.153863466	2.998020796	-0.579132162	0.547203211	-1.301946185	0.469675385	-0.286550499	-0.237202109	-0.603470624	0.628171949	0.579132162	-0.595318735	1.080563549
GRMZM2G017537	-0.923055543	0.372878156	0.394875486	0.195363108	-0.731172307	0.051108415	0.492617885	0.126347925	-0.892205847	-0.365586148	-1.368372038	-0.051108415	-0.133217035	-0.776421761	-0.508057465	-1.757666049	-0.216235289	0.023842473	-1.032943298	0.823319923	0.181496015	-1.240815502	0.365586148	-2.171527717	0.619896262	-0.7490877	-0.603470624	-1.184000049	0.91267586	1.318010897	0.944119285	-0.628171949	-0.976525035	-1.286210621	-1.669043821	0.286550499	0.030656506	1.130769373	-1.092857156	0.892205847	-1.156974916	0.119484771	0.902393588	0.071581727	0.446977502	0.813797671	-0.336607179	-0.258273739	0.628171949
GRMZM2G119521	0.409646587	0.439462999	-0.202310601	0.462083086	0.044289159	-0.670220259	0.603470624	-0.813797671	2.045954276	-0.998710851	1.092857156	1.902810954	2.345104662	-1.092857156	0.216235289	0.030656506	-0.010217413	0.037471962	-0.044289159	-0.336607179	-0.279460686	-0.595318735	1.946202375	0.965610478	-0.402250065	-0.882109877	0.539308633	1.351202935	-0.933535639	1.009990169	0.51582268	0.387522319	0.785662535	-1.946202375	-0.696025208	-0.965610478	0.322224522	1.184000049	0.126347925	1.255660378	-1.184000049	0.6448541	0.064754379	-0.902393588	-1.044626445	0.45451733	-0.987557182	-2.645701413	-0.365586148
GRMZM2G360688	-0.484942137	0.181496015	-0.74010031	-1.009990169	0.195363108	0.713488578	0.758136008	-0.776421761	-2.645701413	0.010217413	-0.892205847	0.085246759	-0.998710851	0.446977502	-1.523165155	-0.944119285	0.508057465	1.368372038	-0.446977502	0.402250065	-0.758136008	0.571095686	-2.171527717	-0.83291742	-0.477294855	-0.424507616	0.078412413	-0.539308633	0.237202109	1.946202375	1.385954264	1.422465003	1.211918765	0.954809756	0.202310601	1.33442315	1.501786817	-1.568142731	-0.862182757	0.91267586	0.35105981	-1.170380633	0.785662535	0.279460686	0.105775004	-0.265322712	1.143773961	-1.056453949	0.315058297
GRMZM2G122954	0.146974467	-0.064754379	-0.944119285	0.394875486	0.251237576	-0.209267873	0.998710851	0.037471962	-0.555132042	-0.307908216	-0.251237576	1.33442315	-0.365586148	-1.240815502	-1.044626445	1.591873889	-0.023842473	-0.571095686	-0.258273739	0.409646587	-2.104600628	0.469675385	0.636490883	0.35105981	-0.044289159	-0.300773842	-0.315058297	-0.823319923	-0.603470624	-0.336607179	0.064754379	0.492617885	-0.35105981	0.372878156	-0.508057465	-0.105775004	-0.223213218	-0.45451733	-0.579132162	0.223213218	-0.202310601	-1.143773961	-0.563095926	-1.318010897	0.923055543	0.83291742	-1.422465003	0.892205847	0.547203211
GRMZM2G327662	1.441453795	-2.998020796	-2.645701413	-2.468001988	1.156974916	-2.345104662	-0.767246816	2.045954276	-0.160759774	1.240815502	-0.358313528	1.669043821	-2.249880663	0.595318735	-0.286550499	0.484942137	-0.804348643	-2.104600628	-2.045954276	-0.140092436	0.244213829	-0.500322766	1.211918765	-0.731172307	0.160759774	-1.993601218	0.954809756	-0.563095926	-0.071581727	1.143773961	0.508057465	0.902393588	0.439462999	-0.653262666	1.368372038	1.726602201	-0.293654744	-0.484942137	0.892205847	-0.244213829	-1.862731867	1.270787244	-1.825439172	-1.790524917	0.678771572	0.6448541	1.044626445	-0.057930049	2.249880663
GRMZM2G015859	-0.223213218	-2.998020796	0.687372812	0.731172307	-2.645701413	2.104600628	0.153863466	-2.468001988	-2.249880663	0.365586148	0.628171949	2.998020796	0.91267586	-2.171527717	-2.104600628	0.167663737	0.976525035	1.501786817	0.286550499	1.197842699	-1.946202375	-0.265322712	0.6448541	0.933535639	-1.902810954	-1.862731867	0.293654744	0.862182757	0.965610478	1.286210621	1.697120332	1.642224543	2.045954276	0.230202032	-0.315058297	-1.726602201	0.322224522	-0.244213829	-1.697120332	-1.669043821	0.409646587	0.216235289	-1.642224543	0.51582268	1.184000049	1.143773961	-1.616536998	-1.591873889	-0.09208509
GRMZM2G016958	0.030656506	-0.037471962	-0.563095926	0.023842473	0.300773842	-0.315058297	0.678771572	1.862731867	1.757666049	0.140092436	-1.441453795	0.902393588	-1.616536998	0.35105981	0.167663737	0.424507616	-0.446977502	0.202310601	-0.223213218	0.923055543	-1.642224543	-1.211918765	-0.417065588	1.825439172	0.547203211	-1.902810954	-1.080563549	0.402250065	0.944119285	0.237202109	0.508057465	0.954809756	-1.48107362	-1.460977052	-0.91267586	1.184000049	0.767246816	-0.35105981	-0.044289159	-0.078412413	-1.368372038	-0.409646587	1.368372038	0.409646587	1.545263217	1.170380633	-0.023842473	-1.790524917	-0.731172307
GRMZM2G072578	1.226239142	0.223213218	-1.211918765	-0.051108415	1.385954264	-0.307908216	-0.037471962	-0.804348643	2.998020796	0.446977502	1.993601218	1.255660378	-1.385954264	-0.6448541	0.636490883	0.343824517	0.140092436	-0.003405752	0.394875486	0.892205847	-1.255660378	-0.628171949	1.105318189	0.209267873	-0.167663737	-0.51582268	-0.216235289	0.628171949	1.441453795	0.944119285	-0.713488578	-0.892205847	0.188425032	-0.563095926	0.293654744	0.037471962	-0.380190046	0.105775004	-0.965610478	0.954809756	-1.009990169	-0.272384894	0.322224522	0.402250065	-0.571095686	-0.409646587	-0.862182757	-0.83291742	-1.48107362
GRMZM2G162931	0.547203211	0.409646587	-0.477294855	-1.351202935	-0.071581727	0.017029548	0.358313528	-0.51582268	-1.726602201	0.167663737	-1.032943298	0.713488578	-1.501786817	0.842592259	-1.021399468	-0.687372812	1.021399468	-0.174575701	-2.171527717	1.790524917	1.286210621	-0.563095926	-1.642224543	0.216235289	1.184000049	-0.767246816	-0.358313528	-1.197842699	-1.441453795	-0.603470624	1.009990169	-0.987557182	-0.153863466	-0.300773842	-0.372878156	2.345104662	1.616536998	0.595318735	-0.547203211	0.387522319	-0.523619123	0.813797671	0.628171949	0.380190046	-1.301946185	0.279460686	0.223213218	-0.678771572	-0.017029548
GRMZM2G401339	0.35105981	1.726602201	1.197842699	-0.057930049	-0.603470624	-0.372878156	0.83291742	-0.329407333	0.500322766	-0.767246816	-1.156974916	0.539308633	-0.071581727	0.146974467	-0.484942137	-0.722302208	0.45451733	0.09208509	-1.092857156	0.343824517	0.508057465	-2.998020796	-0.167663737	-0.823319923	1.368372038	1.441453795	1.270787244	2.998020796	0.976525035	0.387522319	-0.365586148	-0.307908216	2.045954276	-1.616536998	-0.394875486	-0.174575701	0.209267873	0.944119285	-0.064754379	0.923055543	-0.195363108	-0.74010031	1.226239142	0.804348643	-0.209267873	0.872103029	1.117953259	-1.825439172	1.862731867
GRMZM2G112914	-0.017029548	-0.731172307	-0.477294855	0.300773842	-0.872103029	-1.862731867	1.021399468	-0.230202032	1.726602201	-2.104600628	-0.902393588	-0.661717677	-1.117953259	0.003405752	-0.678771572	-0.484942137	-1.301946185	0.758136008	-1.946202375	0.402250065	-0.35105981	-0.74010031	0.595318735	-1.568142731	1.697120332	-0.160759774	0.279460686	0.010217413	0.251237576	0.713488578	0.098927729	-0.329407333	-0.611662814	-1.545263217	-1.501786817	-2.345104662	0.112627241	1.825439172	-0.315058297	0.45451733	-1.270787244	-0.758136008	0.944119285	1.422465003	0.74010031	0.343824517	-0.785662535	0.105775004	1.270787244
GRMZM2G171822	0.923055543	0.563095926	-0.017029548	0.417065588	-0.678771572	-0.571095686	0.954809756	-0.563095926	2.104600628	-0.343824517	-0.767246816	-1.092857156	1.825439172	-0.492617885	0.174575701	0.167663737	-0.237202109	-0.7490877	-0.365586148	-0.071581727	-0.804348643	-1.143773961	1.032943298	-0.051108415	0.223213218	0.902393588	0.112627241	1.616536998	0.126347925	0.153863466	-1.726602201	-0.133217035	0.595318735	0.209267873	-1.056453949	-1.170380633	0.071581727	0.365586148	-1.226239142	-0.098927729	-0.731172307	-1.568142731	-0.477294855	-0.508057465	0.35105981	1.33442315	-0.653262666	-2.045954276	-0.202310601
GRMZM2G050371	-2.645701413	0.424507616	-0.678771572	0.804348643	0.547203211	-1.021399468	0.767246816	-0.872103029	-2.345104662	-0.91267586	-0.424507616	1.790524917	0.446977502	-0.539308633	-1.092857156	-0.272384894	-0.45451733	0.628171949	-0.439462999	0.758136008	-1.48107362	0.343824517	0.126347925	-1.460977052	-0.587206217	-0.794970891	-0.7490877	-0.119484771	1.170380633	-0.293654744	1.33442315	-0.057930049	1.669043821	-1.226239142	-1.697120332	1.385954264	-0.044289159	-0.023842473	-1.184000049	0.587206217	-0.842592259	-0.209267873	-0.237202109	0.017029548	-0.315058297	1.422465003	-0.852346618	0.6448541	0.51582268
GRMZM2G415790	-2.998020796	1.441453795	-2.645701413	-2.468001988	0.555132042	-2.345104662	0.563095926	-0.237202109	2.645701413	1.993601218	1.240815502	0.300773842	-0.023842473	0.223213218	0.071581727	0.619896262	-0.202310601	-2.171527717	-2.104600628	-2.045954276	-1.993601218	-1.946202375	-1.902810954	2.045954276	-1.862731867	0.678771572	0.322224522	0.579132162	-1.825439172	-1.790524917	-1.757666049	-1.697120332	-1.642224543	-1.616536998	-1.591873889	-0.160759774	-1.568142731	1.616536998	-0.195363108	0.6448541	-1.523165155	0.244213829	0.160759774	0.500322766	0.687372812	0.037471962	-1.501786817	-1.48107362	1.197842699
GRMZM2G320941	-2.998020796	1.422465003	-0.140092436	0.579132162	-0.195363108	1.286210621	1.33442315	-2.645701413	-2.468001988	-0.704730028	-2.345104662	1.993601218	-0.272384894	0.776421761	-2.249880663	0.258273739	-0.409646587	-2.171527717	1.862731867	0.017029548	1.460977052	-2.104600628	0.51582268	0.933535639	1.351202935	-0.230202032	-0.446977502	-0.842592259	0.731172307	0.531447525	1.068431117	1.143773961	-0.153863466	-0.202310601	-0.462083086	0.251237576	-0.237202109	0.767246816	0.998710851	0.523619123	-0.387522319	-0.882109877	-0.823319923	-0.722302208	1.403975696	1.117953259	-0.358313528	0.293654744	0.687372812
GRMZM2G062318	2.468001988	-0.852346618	1.240815502	0.300773842	0.852346618	1.422465003	-0.882109877	-0.237202109	1.993601218	-0.687372812	-0.307908216	0.823319923	-1.697120332	-0.758136008	1.156974916	0.216235289	1.044626445	0.35105981	-0.595318735	-0.794970891	-0.731172307	0.402250065	-0.74010031	1.301946185	-0.976525035	-0.216235289	-1.044626445	-0.785662535	0.987557182	-2.045954276	-2.345104662	0.023842473	-0.571095686	0.462083086	0.343824517	-0.244213829	0.223213218	-1.009990169	-1.270787244	1.642224543	-0.409646587	-0.636490883	-1.301946185	-1.545263217	-0.174575701	-0.603470624	-0.064754379	-0.555132042	0.258273739
GRMZM2G057237	0.402250065	-0.653262666	-0.126347925	-0.286550499	0.133217035	1.697120332	0.265322712	0.358313528	-2.345104662	0.51582268	-0.555132042	0.74010031	-0.477294855	1.032943298	-0.636490883	-0.7490877	1.156974916	0.272384894	0.794970891	0.500322766	0.804348643	0.195363108	-0.563095926	-0.064754379	-0.112627241	-2.104600628	1.33442315	-2.045954276	0.933535639	-1.318010897	-0.882109877	-2.249880663	1.184000049	0.785662535	0.202310601	0.842592259	-0.965610478	-1.669043821	-0.872103029	0.119484771	-1.460977052	0.209267873	-0.424507616	-1.385954264	-1.545263217	0.713488578	0.571095686	-0.071581727	0.017029548
GRMZM2G164591	0.51582268	0.882109877	-0.555132042	0.424507616	0.944119285	-0.944119285	0.628171949	-1.790524917	2.468001988	-0.7490877	-0.661717677	-0.315058297	0.767246816	-1.902810954	0.223213218	0.017029548	-0.998710851	-0.539308633	0.126347925	-0.678771572	-0.595318735	-0.230202032	-1.021399468	-0.523619123	-0.146974467	0.336607179	-0.380190046	1.757666049	0.265322712	-0.037471962	-0.785662535	-0.636490883	0.181496015	-2.998020796	0.064754379	-0.987557182	-1.523165155	0.329407333	0.555132042	0.300773842	-0.965610478	-0.237202109	1.669043821	1.170380633	1.156974916	0.636490883	0.209267873	0.112627241	0.804348643
GRMZM2G018619	-1.056453949	0.439462999	0.237202109	-0.030656506	-0.45451733	-0.380190046	0.91267586	-0.653262666	-2.468001988	-0.74010031	-2.045954276	-0.91267586	1.757666049	0.030656506	-0.882109877	-0.469675385	-1.616536998	0.477294855	0.628171949	-0.300773842	-1.568142731	-1.286210621	0.954809756	0.258273739	1.368372038	-1.170380633	-0.230202032	1.286210621	-0.272384894	0.998710851	1.591873889	-0.174575701	0.523619123	-2.104600628	0.244213829	0.119484771	0.105775004	0.078412413	-0.343824517	1.130769373	-0.43197323	0.923055543	0.209267873	-0.508057465	0.587206217	0.785662535	1.080563549	0.394875486	0.539308633
AC190816.3_FG007	1.441453795	-0.336607179	-0.098927729	-0.112627241	0.300773842	0.322224522	1.044626445	-0.358313528	-2.468001988	0.944119285	0.417065588	0.160759774	0.409646587	-2.345104662	-0.140092436	-2.249880663	0.776421761	0.402250065	1.825439172	0.758136008	-0.409646587	-2.171527717	-2.104600628	0.653262666	0.188425032	-0.500322766	0.500322766	-0.09208509	-1.993601218	-0.223213218	-0.023842473	-1.946202375	0.181496015	-0.439462999	-0.174575701	0.731172307	-0.146974467	-1.862731867	0.91267586	-0.372878156	1.568142731	1.021399468	-1.825439172	-1.790524917	-1.757666049	0.678771572	-0.43197323	-0.265322712	1.301946185
GRMZM2G057057	-1.501786817	1.021399468	-0.424507616	-0.230202032	-0.119484771	0.43197323	1.240815502	-1.669043821	-0.678771572	0.300773842	-1.385954264	0.539308633	1.757666049	-0.387522319	-2.468001988	-1.697120332	0.202310601	-0.140092436	0.636490883	-0.670220259	-0.7490877	-1.170380633	0.244213829	-1.642224543	1.790524917	-0.195363108	-0.579132162	2.104600628	-0.202310601	0.492617885	1.460977052	-0.181496015	0.872103029	-0.944119285	-0.539308633	0.477294855	-0.216235289	1.403975696	1.441453795	0.439462999	-1.117953259	0.687372812	1.642224543	1.697120332	1.993601218	0.767246816	-0.83291742	0.085246759	0.998710851
GRMZM5G889326	-2.998020796	0.439462999	0.813797671	0.611662814	-0.126347925	0.230202032	0.758136008	-2.645701413	-0.6448541	-2.468001988	-2.345104662	1.545263217	0.776421761	0.619896262	-2.171527717	0.923055543	-0.402250065	-2.104600628	-0.160759774	0.174575701	-0.133217035	-2.045954276	0.119484771	0.872103029	1.993601218	0.43197323	-0.146974467	-1.993601218	0.704730028	0.446977502	-0.547203211	0.286550499	-0.244213829	-0.670220259	0.126347925	1.170380633	-0.446977502	-1.825439172	-0.098927729	0.202310601	0.023842473	-0.105775004	-1.790524917	-1.757666049	0.852346618	1.240815502	-0.300773842	-0.216235289	-0.678771572
GRMZM2G176304	1.368372038	-2.998020796	0.409646587	0.133217035	-0.300773842	-0.767246816	-0.45451733	-1.021399468	0.587206217	-2.645701413	-2.468001988	-0.547203211	0.160759774	-0.965610478	-0.531447525	-0.670220259	0.112627241	0.223213218	0.446977502	-0.555132042	1.156974916	0.469675385	0.286550499	1.056453949	-2.249880663	1.825439172	-0.044289159	-2.171527717	-2.104600628	-0.078412413	-2.045954276	-1.032943298	-0.462083086	-0.202310601	1.170380633	0.064754379	-1.946202375	1.092857156	1.545263217	1.697120332	0.785662535	-0.619896262	-1.862731867	-0.343824517	0.322224522	-0.146974467	0.731172307	0.258273739	-0.380190046
AC225308.2_FG005	0.181496015	1.184000049	-0.258273739	0.030656506	-0.146974467	1.460977052	0.595318735	1.156974916	-2.645701413	0.188425032	-0.372878156	0.064754379	0.571095686	-0.492617885	0.133217035	-0.286550499	-0.477294855	0.603470624	-2.468001988	0.202310601	-0.167663737	0.140092436	-0.976525035	0.230202032	0.954809756	1.385954264	0.785662535	-1.403975696	-0.023842473	0.462083086	0.619896262	0.704730028	0.6448541	-0.704730028	-0.595318735	0.307908216	0.976525035	0.300773842	-0.105775004	-0.409646587	0.767246816	-1.092857156	-2.345104662	-2.249880663	0.555132042	-0.933535639	0.852346618	-0.83291742	-1.105318189
GRMZM2G486741	0.223213218	-2.998020796	-2.645701413	1.143773961	0.300773842	0.417065588	1.501786817	0.872103029	0.965610478	0.611662814	0.195363108	1.368372038	1.591873889	0.315058297	-2.249880663	-2.171527717	0.286550499	-2.104600628	-2.045954276	-0.279460686	-1.946202375	0.619896262	-0.417065588	0.492617885	-0.223213218	-1.902810954	0.51582268	2.345104662	0.628171949	0.539308633	0.372878156	0.563095926	0.670220259	-1.790524917	-0.230202032	0.842592259	-1.757666049	0.112627241	-1.697120332	-1.669043821	-0.010217413	0.579132162	1.255660378	1.545263217	1.862731867	1.946202375	0.365586148	0.336607179	0.064754379
GRMZM2G177947	1.790524917	0.112627241	0.998710851	-0.713488578	-0.619896262	1.862731867	-0.010217413	0.523619123	-1.993601218	-0.555132042	0.477294855	0.636490883	-1.403975696	1.642224543	-0.329407333	0.563095926	1.226239142	0.380190046	2.468001988	-0.112627241	0.424507616	-0.500322766	-1.351202935	1.009990169	1.170380633	-1.757666049	0.539308633	0.188425032	2.249880663	0.923055543	2.998020796	1.211918765	1.318010897	1.351202935	-0.563095926	1.184000049	-0.484942137	0.587206217	-1.669043821	0.417065588	-1.368372038	-1.270787244	-1.385954264	-1.642224543	-1.441453795	0.167663737	-0.119484771	-1.184000049	-0.307908216
GRMZM2G128233	-0.223213218	1.226239142	-2.998020796	1.032943298	-1.044626445	-0.272384894	-0.484942137	0.216235289	1.351202935	0.74010031	-0.670220259	0.439462999	-0.279460686	-2.345104662	-0.91267586	0.882109877	-0.547203211	-0.195363108	0.307908216	-0.628171949	1.523165155	-2.171527717	2.104600628	0.424507616	-0.209267873	1.368372038	-2.104600628	-0.555132042	-2.045954276	0.071581727	0.713488578	0.611662814	-0.767246816	-0.678771572	-0.83291742	-1.056453949	-1.946202375	0.195363108	0.279460686	-0.064754379	0.265322712	0.030656506	-1.902810954	0.619896262	0.258273739	0.555132042	-1.862731867	1.301946185	0.7490877
GRMZM2G066213	-0.409646587	0.244213829	-0.078412413	0.343824517	-0.336607179	-0.322224522	0.611662814	-1.460977052	2.345104662	-0.402250065	-0.7490877	1.993601218	0.492617885	-0.329407333	-0.785662535	-0.126347925	0.023842473	-0.579132162	1.032943298	0.307908216	-1.862731867	-1.255660378	1.021399468	-0.587206217	-1.032943298	0.105775004	0.098927729	1.501786817	0.329407333	-0.153863466	-0.286550499	0.603470624	0.477294855	-1.184000049	0.380190046	-0.010217413	0.202310601	-1.757666049	0.965610478	-0.35105981	-2.171527717	0.83291742	-0.439462999	0.45451733	0.462083086	-0.500322766	-0.492617885	0.09208509	0.539308633
GRMZM2G000874	0.531447525	0.343824517	0.704730028	-0.126347925	-0.758136008	-2.998020796	-0.469675385	0.237202109	0.307908216	-0.965610478	0.272384894	1.301946185	0.902393588	-0.45451733	-0.188425032	-0.030656506	-0.823319923	-0.987557182	0.484942137	-0.653262666	-1.48107362	0.244213829	-0.998710851	-0.944119285	1.726602201	0.446977502	-0.595318735	0.804348643	-1.286210621	-0.336607179	-0.661717677	-0.619896262	-0.776421761	-0.365586148	0.017029548	-0.882109877	0.636490883	-0.35105981	0.153863466	0.813797671	-0.195363108	0.696025208	1.105318189	0.071581727	0.424507616	1.143773961	0.251237576	-1.080563549	0.469675385
GRMZM2G094831	-0.098927729	-0.417065588	-0.579132162	-0.813797671	0.678771572	-1.422465003	1.117953259	-0.965610478	1.032943298	0.713488578	-0.336607179	-0.237202109	0.146974467	0.469675385	-1.068431117	-1.33442315	-1.156974916	-1.117953259	1.403975696	0.188425032	-0.160759774	0.098927729	2.345104662	-2.645701413	0.343824517	-0.329407333	-0.758136008	1.48107362	-0.057930049	2.249880663	0.776421761	-1.130769373	0.965610478	1.080563549	-0.661717677	-1.240815502	-1.255660378	1.056453949	-0.872103029	0.563095926	0.037471962	0.153863466	0.83291742	0.300773842	0.439462999	-0.446977502	0.424507616	0.579132162	0.661717677
GRMZM2G050875	-1.044626445	1.143773961	0.469675385	0.023842473	1.080563549	0.595318735	0.484942137	1.318010897	0.394875486	2.045954276	0.74010031	-0.492617885	-0.6448541	0.508057465	0.776421761	0.7490877	-0.462083086	1.757666049	0.83291742	0.336607179	0.653262666	-1.068431117	-1.032943298	-1.301946185	-0.636490883	0.933535639	1.697120332	0.804348643	0.167663737	-0.057930049	0.223213218	-0.023842473	1.130769373	1.068431117	0.892205847	1.568142731	-0.286550499	1.862731867	-0.09208509	0.112627241	0.216235289	0.813797671	-0.237202109	-0.251237576	0.09208509	0.044289159	0.202310601	-0.387522319	-0.446977502
GRMZM2G150323	-1.301946185	0.7490877	0.603470624	-0.112627241	-1.184000049	-0.286550499	0.251237576	-0.140092436	-2.249880663	-0.153863466	-2.171527717	0.785662535	0.882109877	-0.872103029	-1.669043821	-0.43197323	-1.117953259	0.628171949	-0.315058297	-0.167663737	1.226239142	-0.329407333	-0.852346618	-1.270787244	1.170380633	-1.021399468	-1.170380633	0.265322712	-0.619896262	0.329407333	0.902393588	-1.068431117	-0.216235289	-0.882109877	-0.933535639	-0.078412413	-0.862182757	1.616536998	1.403975696	0.336607179	-0.439462999	0.74010031	-0.555132042	-1.080563549	0.722302208	0.965610478	-0.230202032	0.998710851	1.545263217
GRMZM2G028467	0.09208509	0.078412413	-1.056453949	0.424507616	0.508057465	0.882109877	0.944119285	-0.508057465	-2.468001988	0.477294855	-1.080563549	0.628171949	-0.687372812	0.315058297	-0.216235289	0.098927729	1.545263217	1.286210621	0.611662814	0.365586148	-0.902393588	-0.804348643	-1.184000049	0.051108415	1.441453795	-0.251237576	1.021399468	-0.595318735	-0.678771572	-0.670220259	0.272384894	0.804348643	-0.43197323	-1.403975696	-0.998710851	0.492617885	0.547203211	-0.223213218	-0.167663737	0.595318735	0.372878156	0.030656506	-2.249880663	-0.380190046	0.358313528	-0.195363108	-0.965610478	-1.318010897	0.195363108
GRMZM2G025002	1.790524917	-2.998020796	1.032943298	0.508057465	-2.645701413	-2.468001988	-2.345104662	0.279460686	1.117953259	-2.104600628	-2.045954276	-1.993601218	0.439462999	-1.862731867	0.492617885	0.603470624	-1.825439172	-1.790524917	2.998020796	-1.757666049	1.403975696	-1.697120332	-1.669043821	-1.642224543	0.987557182	0.315058297	0.976525035	0.813797671	-1.616536998	0.43197323	-1.591873889	0.258273739	-1.568142731	-1.545263217	0.010217413	-1.523165155	1.226239142	-1.48107362	-1.460977052	-1.441453795	-1.422465003	2.045954276	-1.403975696	-1.385954264	0.469675385	2.104600628	-1.368372038	1.318010897	-1.351202935
GRMZM2G116004	0.286550499	0.91267586	0.6448541	-0.852346618	-0.216235289	-0.372878156	-0.293654744	-0.365586148	-2.998020796	1.080563549	-1.170380633	0.051108415	-0.462083086	0.272384894	-0.923055543	-0.785662535	1.184000049	0.500322766	0.307908216	0.603470624	-0.35105981	0.892205847	-2.171527717	-0.954809756	1.591873889	-1.48107362	-1.092857156	-1.568142731	-0.446977502	0.202310601	1.501786817	-0.258273739	-0.358313528	-0.380190046	0.181496015	1.117953259	-0.678771572	-0.51582268	1.286210621	0.987557182	0.195363108	1.318010897	-1.422465003	-0.286550499	-0.508057465	1.211918765	0.209267873	0.380190046	1.33442315
GRMZM2G426922	0.611662814	1.009990169	-2.998020796	0.202310601	1.48107362	-2.645701413	-0.098927729	0.7490877	-2.468001988	-2.345104662	1.255660378	-2.249880663	0.74010031	-2.104600628	0.500322766	0.402250065	-2.045954276	-1.993601218	-1.946202375	1.032943298	-1.902810954	-0.167663737	-1.862731867	-0.064754379	0.279460686	-0.181496015	-1.790524917	-1.757666049	-1.726602201	0.446977502	0.902393588	-1.697120332	1.105318189	0.044289159	-0.216235289	-1.591873889	-1.568142731	0.587206217	0.804348643	0.251237576	-1.545263217	0.010217413	-1.523165155	0.064754379	0.776421761	-1.501786817	-1.48107362	0.424507616	0.933535639
AC204530.4_FG003	-0.74010031	-0.160759774	0.003405752	0.6448541	-0.722302208	0.785662535	0.35105981	-1.068431117	0.976525035	-1.642224543	-1.403975696	0.119484771	1.422465003	-0.987557182	-0.258273739	0.987557182	-0.767246816	-0.484942137	-0.153863466	0.713488578	1.993601218	-1.301946185	-0.078412413	1.226239142	0.181496015	-0.188425032	0.902393588	1.669043821	0.167663737	0.010217413	-0.322224522	-0.307908216	1.385954264	-0.813797671	-0.842592259	-0.140092436	0.531447525	-0.83291742	-0.112627241	-0.45451733	0.078412413	0.223213218	0.037471962	0.678771572	0.595318735	-0.365586148	-0.251237576	0.758136008	-1.184000049
GRMZM2G471814	0.258273739	-0.057930049	0.539308633	-0.358313528	1.501786817	-0.563095926	0.439462999	0.057930049	1.156974916	1.105318189	0.563095926	0.595318735	0.776421761	0.484942137	2.645701413	0.804348643	-0.965610478	-0.343824517	-2.998020796	-1.226239142	1.021399468	0.336607179	0.409646587	0.842592259	-0.003405752	1.568142731	-0.078412413	0.785662535	2.171527717	0.670220259	0.09208509	-0.653262666	-0.7490877	-2.645701413	0.944119285	1.270787244	-0.064754379	0.74010031	-2.468001988	0.244213829	-0.998710851	-1.351202935	-2.345104662	-2.249880663	-2.171527717	0.872103029	0.023842473	0.976525035	-0.987557182
GRMZM2G146472	-1.616536998	0.531447525	0.696025208	0.181496015	-0.862182757	0.188425032	0.823319923	-1.056453949	-1.523165155	0.484942137	-0.998710851	1.032943298	0.098927729	1.092857156	0.758136008	1.240815502	-1.501786817	-0.167663737	2.249880663	-0.500322766	0.010217413	0.085246759	0.862182757	-0.09208509	0.051108415	-0.286550499	1.255660378	0.500322766	-0.051108415	-0.83291742	-0.758136008	0.785662535	2.104600628	0.322224522	0.794970891	0.976525035	1.422465003	-0.731172307	0.023842473	-0.126347925	-0.098927729	-0.223213218	1.286210621	1.591873889	-0.595318735	-0.555132042	2.468001988	-0.722302208	-0.133217035
GRMZM2G000076	-0.237202109	0.244213829	0.051108415	0.064754379	0.776421761	0.6448541	-0.244213829	0.365586148	-0.446977502	1.301946185	0.446977502	1.726602201	-0.965610478	0.944119285	-0.902393588	-0.571095686	0.358313528	-0.365586148	1.286210621	-0.265322712	-1.523165155	0.767246816	-2.645701413	-0.842592259	-0.387522319	0.071581727	0.167663737	-1.757666049	0.030656506	0.307908216	1.368372038	-0.188425032	-1.255660378	0.687372812	0.09208509	-0.358313528	-0.078412413	-1.422465003	-1.368372038	0.343824517	-1.726602201	-1.301946185	-2.345104662	-0.35105981	-0.531447525	0.181496015	-0.776421761	0.216235289	0.402250065
AC199820.4_FG006	1.286210621	1.226239142	0.140092436	1.105318189	0.064754379	-0.83291742	0.272384894	-1.616536998	-2.171527717	-1.117953259	-1.902810954	2.345104662	-0.380190046	0.653262666	-1.993601218	0.492617885	-0.954809756	-0.882109877	2.468001988	0.372878156	-0.409646587	0.010217413	0.484942137	1.591873889	1.669043821	0.923055543	-1.368372038	-0.372878156	-0.167663737	-0.794970891	1.143773961	0.387522319	1.902810954	-0.508057465	-1.056453949	0.619896262	-0.43197323	-0.965610478	0.394875486	1.270787244	0.45451733	-1.197842699	-0.030656506	-0.492617885	0.105775004	0.244213829	0.315058297	-1.032943298	0.987557182
GRMZM2G028552	2.645701413	-0.45451733	-0.064754379	0.954809756	0.105775004	0.852346618	0.133217035	-0.265322712	-2.249880663	0.731172307	1.697120332	1.318010897	0.944119285	0.265322712	-0.307908216	-0.43197323	0.767246816	0.813797671	-0.944119285	0.017029548	-1.143773961	1.568142731	-1.056453949	-0.174575701	0.91267586	1.255660378	0.794970891	-0.7490877	-0.133217035	0.477294855	1.032943298	1.197842699	0.619896262	-1.642224543	0.202310601	1.143773961	0.7490877	-0.112627241	-0.216235289	1.021399468	-0.852346618	1.301946185	-0.037471962	-1.009990169	0.902393588	0.785662535	-0.003405752	0.195363108	-0.579132162
GRMZM2G180947	0.167663737	-0.469675385	1.993601218	-2.998020796	0.216235289	0.417065588	1.351202935	0.098927729	2.998020796	0.272384894	-0.202310601	2.104600628	1.591873889	0.372878156	0.83291742	-0.704730028	-1.422465003	0.944119285	-1.270787244	0.7490877	0.587206217	-2.645701413	-0.336607179	-0.83291742	-0.098927729	-0.037471962	-0.244213829	2.468001988	0.394875486	0.133217035	0.202310601	-0.09208509	-0.43197323	0.998710851	0.322224522	0.767246816	0.678771572	1.616536998	0.687372812	-0.976525035	-0.402250065	1.056453949	0.265322712	-0.064754379	1.032943298	0.91267586	-0.119484771	-1.368372038	1.270787244
GRMZM2G131340	1.591873889	-1.117953259	-0.587206217	0.776421761	0.462083086	0.216235289	-0.731172307	-1.211918765	1.862731867	0.051108415	0.74010031	-0.133217035	1.790524917	-2.104600628	0.064754379	-0.687372812	-1.616536998	-1.441453795	-1.318010897	0.112627241	0.653262666	0.223213218	-0.023842473	-0.329407333	1.068431117	0.7490877	-1.009990169	2.171527717	-0.872103029	1.301946185	1.501786817	1.946202375	-1.726602201	0.071581727	-0.265322712	-0.767246816	-0.722302208	0.43197323	-0.372878156	-0.279460686	0.258273739	0.500322766	0.146974467	-0.188425032	0.140092436	0.587206217	-1.545263217	0.842592259	-0.661717677
GRMZM2G326472	-0.758136008	-0.976525035	0.202310601	0.661717677	-0.531447525	0.146974467	-0.202310601	-0.010217413	-2.998020796	0.387522319	-1.170380633	0.057930049	-1.044626445	-1.092857156	-0.767246816	-0.133217035	-0.43197323	0.119484771	-0.017029548	0.051108415	0.713488578	0.508057465	-1.757666049	0.003405752	-0.892205847	-0.286550499	-0.785662535	-1.368372038	-0.91267586	-0.74010031	0.862182757	0.181496015	-0.965610478	1.105318189	0.251237576	1.286210621	0.976525035	-1.385954264	-0.462083086	-0.387522319	-0.315058297	0.336607179	-1.790524917	-1.422465003	0.842592259	-0.030656506	-1.351202935	-0.636490883	0.279460686
GRMZM5G863229	0.181496015	-1.318010897	-1.143773961	-0.387522319	0.044289159	-0.35105981	0.804348643	-0.343824517	-2.104600628	1.170380633	0.071581727	1.545263217	2.645701413	-0.603470624	-1.184000049	-0.051108415	0.6448541	0.030656506	-0.300773842	0.293654744	-0.372878156	-0.462083086	-1.697120332	-0.279460686	-1.862731867	-0.45451733	-0.336607179	0.307908216	-0.286550499	0.611662814	1.056453949	0.078412413	1.642224543	-1.591873889	-1.946202375	0.74010031	0.119484771	-0.944119285	-1.501786817	-0.611662814	-2.171527717	-0.785662535	1.318010897	1.697120332	0.794970891	1.726602201	-0.223213218	-1.460977052	-0.098927729
AC210892.4_FG006	-0.469675385	0.251237576	-2.998020796	-0.071581727	-2.645701413	0.064754379	0.539308633	-2.468001988	0.776421761	-2.249880663	0.933535639	-0.105775004	1.545263217	0.098927729	-0.09208509	1.032943298	0.202310601	-0.300773842	-2.104600628	-2.045954276	0.804348643	-0.251237576	0.272384894	-1.993601218	2.249880663	0.365586148	-1.946202375	-0.35105981	-1.902810954	-0.153863466	-1.862731867	-0.508057465	0.010217413	-0.43197323	1.143773961	-1.757666049	-1.726602201	0.785662535	-1.669043821	0.003405752	0.484942137	-0.446977502	-1.642224543	0.188425032	0.872103029	-0.112627241	-1.616536998	0.882109877	0.976525035
GRMZM2G043396	-0.45451733	1.403975696	0.43197323	0.209267873	0.776421761	0.704730028	0.265322712	0.785662535	2.171527717	0.409646587	0.003405752	2.104600628	0.882109877	1.318010897	1.946202375	0.603470624	0.279460686	-1.105318189	1.790524917	0.611662814	1.117953259	0.195363108	0.126347925	1.441453795	-1.226239142	0.105775004	-1.351202935	0.358313528	-1.092857156	0.380190046	-1.021399468	-0.188425032	-0.670220259	-2.345104662	1.301946185	-0.500322766	-0.678771572	-1.056453949	-0.976525035	0.965610478	-1.240815502	0.45451733	0.343824517	0.244213829	0.636490883	-1.862731867	-1.368372038	-1.669043821	-0.216235289
GRMZM2G035243	-0.279460686	1.790524917	0.508057465	-0.417065588	0.244213829	-0.91267586	0.492617885	-1.270787244	0.105775004	1.301946185	-0.944119285	2.249880663	2.345104662	-0.862182757	-0.696025208	0.469675385	0.160759774	-0.394875486	0.842592259	-1.642224543	0.862182757	-0.579132162	-1.117953259	-0.329407333	0.167663737	-0.603470624	-2.468001988	1.757666049	-0.539308633	0.523619123	0.987557182	-0.265322712	1.270787244	-0.45451733	0.823319923	1.056453949	-0.078412413	-0.037471962	1.48107362	0.965610478	-1.825439172	1.226239142	-1.757666049	-1.790524917	0.547203211	0.813797671	-0.998710851	0.286550499	0.446977502
GRMZM2G475971	-0.167663737	0.555132042	-0.882109877	0.547203211	0.230202032	-0.017029548	2.249880663	0.174575701	1.568142731	-0.133217035	-0.531447525	1.351202935	2.345104662	-0.603470624	-0.923055543	0.279460686	-2.998020796	0.417065588	0.6448541	0.902393588	0.670220259	-2.645701413	-1.068431117	-2.468001988	0.023842473	-0.322224522	-0.279460686	0.595318735	0.776421761	1.501786817	0.387522319	-0.272384894	0.944119285	-2.345104662	-0.085246759	0.579132162	-0.140092436	-0.794970891	-0.315058297	1.092857156	-2.249880663	-0.216235289	1.240815502	1.726602201	1.270787244	-0.477294855	-2.171527717	0.078412413	-0.037471962
GRMZM5G824843	0.987557182	-0.09208509	-0.336607179	0.126347925	-0.174575701	1.993601218	-0.195363108	0.424507616	-2.104600628	0.678771572	-0.813797671	0.202310601	0.336607179	0.804348643	-0.758136008	-0.322224522	1.946202375	0.023842473	-0.358313528	0.51582268	0.230202032	1.825439172	-0.892205847	0.882109877	1.318010897	-1.286210621	-0.91267586	-0.923055543	-0.044289159	-1.255660378	0.209267873	0.704730028	-0.976525035	-1.33442315	1.143773961	0.670220259	0.119484771	-0.140092436	0.35105981	0.976525035	-1.044626445	0.064754379	-2.345104662	-1.862731867	0.539308633	0.555132042	-1.197842699	-0.998710851	-0.329407333
GRMZM2G093146	-0.167663737	0.785662535	-0.872103029	-0.823319923	0.272384894	0.126347925	-0.343824517	0.758136008	-2.645701413	-1.48107362	-0.758136008	0.687372812	0.51582268	-0.7490877	0.265322712	0.223213218	0.469675385	0.611662814	-0.223213218	-0.057930049	-0.696025208	-0.704730028	0.195363108	-0.43197323	-0.944119285	-1.143773961	0.713488578	-0.785662535	-1.080563549	1.301946185	1.616536998	0.794970891	1.197842699	0.45451733	-0.492617885	0.174575701	0.439462999	-1.368372038	0.872103029	0.098927729	-0.140092436	-0.523619123	0.258273739	-0.307908216	-0.174575701	-0.402250065	0.329407333	-0.722302208	0.071581727
GRMZM2G168412	0.976525035	0.188425032	-0.300773842	-0.35105981	-0.160759774	1.032943298	0.336607179	-0.852346618	-2.645701413	1.211918765	-0.446977502	1.568142731	0.126347925	-0.133217035	-0.611662814	-0.258273739	1.993601218	0.153863466	0.085246759	0.713488578	-0.409646587	-1.591873889	0.343824517	0.037471962	0.140092436	-0.539308633	-0.547203211	-1.669043821	1.368372038	0.402250065	1.318010897	0.286550499	0.35105981	-0.767246816	-0.954809756	0.424507616	1.130769373	0.010217413	-0.380190046	1.441453795	-1.993601218	-0.424507616	1.825439172	0.579132162	-0.286550499	1.422465003	-0.83291742	0.628171949	-0.174575701
GRMZM2G082199	0.902393588	-0.954809756	-1.790524917	1.385954264	-1.032943298	-0.202310601	-0.462083086	-0.636490883	0.661717677	0.181496015	0.424507616	2.249880663	-0.209267873	0.003405752	-1.993601218	0.126347925	-1.501786817	0.462083086	2.045954276	-0.230202032	-1.902810954	-0.343824517	-0.037471962	-1.403975696	0.329407333	-0.153863466	-0.892205847	0.417065588	0.892205847	1.080563549	0.272384894	-1.044626445	-0.579132162	0.704730028	-0.307908216	-0.195363108	-0.244213829	0.579132162	0.523619123	-0.804348643	-1.568142731	-0.7490877	0.188425032	0.687372812	-0.216235289	1.351202935	1.068431117	0.195363108	1.616536998
[truncated: 248 more columns]
