# Supplementary material for: Verification of Three-Phase Dependency Analysis Bayesian Network Learning Method for Maize Carotenoid Gene Mining
Source: Biomed Res Int. 2017 Jul 30;2017:1813494. doi: 10.1155/2017/1813494 (PMC5554554; doi:10.1155/2017/1813494)
Supplement: Supplementary file 1 — The experiment data 1 of 109 nodes, the experiment data 2 of 109 nodes, and so on are shown here. [file 1813494.f1.zip › Supplementary material/Gene100_6.csv]

V1	V2	V3	V4	V5	V6	V7	V8	V9	V10	V11	V12	V13	V14	V15	V16	V17	V18	V19	V20	V21	V22	V23	V24	V25	V26	V27	V28	V29	V30	V31	V32	V33	V34	V35	V36	V37	V38	V39	V40	V41	V42	V43	V44	V45	V46	V47	V48	V49	V50
GRMZM2G171466	-0.265322712	1.044626445	0.83291742	1.197842699	0.258273739	0.315058297	-0.670220259	0.265322712	1.902810954	1.726602201	-0.539308633	1.170380633	0.944119285	0.892205847	2.645701413	1.240815502	0.160759774	-0.160759774	0.35105981	-1.616536998	1.757666049	0.244213829	1.021399468	-1.368372038	-0.424507616	0.098927729	1.385954264	0.987557182	1.568142731	2.045954276	-0.188425032	0.687372812	1.368372038	0.417065588	1.080563549	-0.272384894	0.767246816	0.862182757	-0.661717677	-0.153863466	-0.051108415	-1.726602201	-0.687372812	0.813797671	-1.032943298	-0.394875486	0.484942137	-0.923055543	-1.545263217
GRMZM2G426483	2.249880663	-0.619896262	-0.160759774	1.092857156	1.117953259	1.790524917	-0.030656506	0.579132162	-2.998020796	0.902393588	-0.587206217	2.045954276	0.785662535	-0.7490877	-0.126347925	0.167663737	0.731172307	0.987557182	-1.318010897	1.197842699	-0.078412413	0.230202032	-1.184000049	1.825439172	-0.265322712	-0.09208509	0.133217035	-2.645701413	-0.767246816	-0.146974467	-0.539308633	-0.105775004	-0.462083086	-0.804348643	0.216235289	0.6448541	0.571095686	-0.83291742	-0.402250065	0.030656506	-0.387522319	-0.372878156	-2.468001988	-1.642224543	0.636490883	-0.251237576	-0.74010031	-0.713488578	-0.595318735
GRMZM2G159171	1.032943298	-0.300773842	0.098927729	-0.933535639	1.642224543	1.226239142	-1.068431117	-0.098927729	0.923055543	2.998020796	0.35105981	0.571095686	2.468001988	1.270787244	-0.965610478	-0.265322712	1.441453795	1.993601218	-0.037471962	-0.547203211	0.785662535	1.197842699	-0.595318735	0.882109877	0.133217035	-0.394875486	1.501786817	-0.336607179	0.547203211	-0.244213829	0.372878156	1.33442315	-0.209267873	-0.587206217	0.83291742	-0.223213218	-0.619896262	-1.130769373	-0.286550499	1.301946185	0.394875486	-2.645701413	-2.045954276	-1.197842699	-0.571095686	-1.523165155	-0.45451733	-0.713488578	-0.216235289
GRMZM2G082916	0.329407333	-0.394875486	-0.43197323	0.636490883	1.616536998	0.119484771	-0.713488578	0.767246816	-2.171527717	0.954809756	-0.358313528	0.804348643	1.825439172	-1.170380633	-0.500322766	-0.6448541	0.272384894	0.579132162	0.251237576	0.6448541	-0.380190046	0.146974467	-2.468001988	0.595318735	-0.954809756	-0.329407333	-0.469675385	-1.270787244	-0.293654744	-0.813797671	0.872103029	0.023842473	-0.484942137	-0.071581727	0.258273739	1.523165155	0.923055543	-1.240815502	-0.322224522	0.265322712	0.057930049	0.358313528	-1.130769373	-1.211918765	1.080563549	0.409646587	-1.403975696	-0.230202032	-0.998710851
GRMZM2G019586	0.469675385	0.300773842	1.568142731	0.057930049	1.056453949	0.7490877	2.249880663	-0.91267586	-0.237202109	-1.523165155	0.003405752	-1.501786817	-0.713488578	1.403975696	-0.776421761	1.902810954	1.286210621	0.010217413	-0.181496015	-1.044626445	1.021399468	0.6448541	1.105318189	1.790524917	0.555132042	0.293654744	-0.244213829	0.758136008	-0.628171949	-0.202310601	-0.462083086	1.170380633	1.130769373	1.726602201	1.368372038	0.446977502	-1.068431117	0.358313528	-2.345104662	0.563095926	-0.037471962	-2.045954276	-1.568142731	-1.009990169	-1.211918765	-0.547203211	-0.105775004	-1.790524917	1.032943298
GRMZM2G120539	0.469675385	0.500322766	-1.523165155	0.064754379	-1.092857156	-1.021399468	1.697120332	-1.170380633	1.240815502	-0.017029548	-0.91267586	0.35105981	2.998020796	-0.098927729	-0.010217413	0.322224522	-1.48107362	-1.902810954	-1.946202375	-0.372878156	-0.6448541	-1.286210621	-0.508057465	0.160759774	0.587206217	-0.424507616	-0.336607179	1.902810954	0.767246816	0.293654744	-1.056453949	-0.307908216	1.545263217	-0.976525035	0.842592259	0.307908216	-0.343824517	0.477294855	0.785662535	0.181496015	-2.249880663	-0.882109877	0.7490877	1.197842699	2.171527717	1.501786817	-0.823319923	0.579132162	1.441453795
GRMZM2G300862	-0.017029548	-0.776421761	0.776421761	0.74010031	0.424507616	1.143773961	0.43197323	0.696025208	-2.998020796	1.240815502	-1.080563549	0.794970891	0.216235289	-0.258273739	-0.380190046	-0.336607179	0.181496015	0.653262666	-0.365586148	0.579132162	-0.687372812	-1.117953259	-2.045954276	-0.954809756	-0.923055543	-0.462083086	-0.469675385	-1.568142731	-0.216235289	0.785662535	0.882109877	0.944119285	-0.394875486	-0.636490883	-0.358313528	1.032943298	0.862182757	-0.315058297	-1.501786817	0.670220259	0.539308633	-0.500322766	-0.133217035	-0.785662535	0.315058297	0.91267586	-0.653262666	-1.184000049	-0.387522319
GRMZM2G148872	-0.098927729	0.547203211	-0.209267873	-1.211918765	-1.351202935	1.591873889	-0.852346618	-1.591873889	-0.823319923	-2.998020796	-0.181496015	0.343824517	1.143773961	-1.642224543	-0.023842473	-1.368372038	1.523165155	1.068431117	0.462083086	-0.611662814	-0.6448541	-0.195363108	0.085246759	-0.882109877	-0.358313528	-1.044626445	-0.872103029	-0.230202032	-0.078412413	-1.318010897	-0.037471962	-0.446977502	0.300773842	0.098927729	-0.653262666	0.160759774	0.595318735	0.713488578	1.286210621	1.130769373	-1.143773961	-1.946202375	0.83291742	0.153863466	0.862182757	-0.293654744	0.508057465	0.409646587	0.037471962
GRMZM2G124684	0.696025208	-0.030656506	0.587206217	0.098927729	0.731172307	-2.998020796	-2.645701413	0.6448541	1.825439172	0.500322766	1.130769373	0.202310601	0.387522319	-2.171527717	-2.104600628	2.045954276	0.315058297	0.923055543	1.211918765	0.74010031	-2.045954276	0.678771572	1.255660378	0.003405752	0.469675385	0.636490883	0.611662814	0.133217035	-1.993601218	1.301946185	2.645701413	0.91267586	-1.902810954	0.030656506	0.83291742	-1.825439172	-1.790524917	0.402250065	-1.726602201	-1.697120332	-1.669043821	-1.642224543	0.776421761	1.009990169	1.184000049	-1.616536998	-0.167663737	0.010217413	0.272384894
GRMZM2G163539	0.595318735	0.071581727	-2.998020796	-2.645701413	0.636490883	0.030656506	-0.160759774	-0.181496015	2.045954276	0.343824517	1.993601218	1.523165155	0.51582268	-2.171527717	-2.104600628	0.146974467	1.568142731	0.862182757	-2.045954276	0.244213829	0.307908216	-1.946202375	0.424507616	0.661717677	1.33442315	1.105318189	0.272384894	0.003405752	-1.862731867	0.731172307	-1.825439172	1.351202935	0.842592259	-1.726602201	-1.697120332	0.587206217	0.83291742	0.767246816	-1.642224543	0.017029548	-1.616536998	0.477294855	-1.591873889	-1.568142731	-0.044289159	0.794970891	-0.064754379	-1.545263217	-1.523165155
GRMZM2G013065	-0.044289159	0.030656506	0.944119285	0.794970891	0.343824517	0.251237576	1.130769373	-0.293654744	-2.645701413	-0.372878156	-0.628171949	0.696025208	1.591873889	-1.143773961	-0.265322712	-0.322224522	-1.184000049	0.500322766	-1.33442315	0.611662814	-0.687372812	-0.477294855	0.023842473	0.315058297	-0.547203211	-0.394875486	-0.785662535	-0.653262666	-1.156974916	0.523619123	0.563095926	-0.43197323	-0.661717677	-0.704730028	0.731172307	0.160759774	0.872103029	0.35105981	-1.286210621	0.776421761	0.286550499	0.057930049	-1.460977052	-1.351202935	1.240815502	0.852346618	-1.068431117	-0.83291742	0.704730028
GRMZM2G312693	-0.343824517	-0.181496015	-1.270787244	-0.587206217	0.140092436	-0.402250065	0.112627241	0.387522319	0.862182757	0.508057465	0.293654744	1.156974916	-0.358313528	0.758136008	-0.174575701	-0.037471962	0.223213218	-0.09208509	2.171527717	-0.010217413	-0.776421761	-0.523619123	0.7490877	-0.731172307	0.965610478	-0.954809756	-1.009990169	1.105318189	-0.372878156	1.790524917	1.068431117	0.279460686	0.265322712	1.946202375	-2.045954276	-0.842592259	-0.078412413	-0.628171949	-0.286550499	0.071581727	0.126347925	-0.307908216	1.021399468	0.670220259	-0.329407333	-0.098927729	-0.380190046	0.619896262	0.813797671
GRMZM2G031991	0.030656506	0.365586148	-1.009990169	0.017029548	0.83291742	-0.365586148	0.785662535	0.300773842	1.757666049	-0.722302208	-0.265322712	-0.112627241	0.45451733	-1.523165155	-0.776421761	-0.595318735	-0.531447525	0.43197323	0.595318735	-0.098927729	-1.184000049	-0.563095926	-0.003405752	0.133217035	0.35105981	0.687372812	0.7490877	2.468001988	-0.307908216	2.171527717	0.976525035	-0.119484771	1.790524917	-2.104600628	-0.923055543	-0.944119285	-0.852346618	0.446977502	0.112627241	-0.09208509	-2.645701413	0.146974467	0.571095686	1.170380633	0.167663737	0.286550499	-0.611662814	-0.998710851	0.140092436
GRMZM2G134064	0.202310601	0.713488578	0.372878156	0.119484771	-0.587206217	-0.91267586	0.017029548	0.209267873	1.946202375	-0.409646587	-0.085246759	-0.057930049	-0.003405752	0.030656506	0.539308633	0.322224522	-0.653262666	-0.523619123	-0.704730028	-0.892205847	-1.642224543	-1.351202935	0.823319923	0.098927729	1.044626445	-0.402250065	0.003405752	0.595318735	1.105318189	0.462083086	-2.468001988	0.731172307	-0.293654744	-0.167663737	-0.343824517	-1.056453949	-0.202310601	1.351202935	-1.568142731	0.611662814	-1.255660378	-1.385954264	-0.446977502	-0.603470624	1.270787244	-1.021399468	-2.171527717	-0.842592259	1.170380633
GRMZM5G827205	-0.336607179	1.130769373	1.33442315	-0.965610478	0.417065588	0.611662814	0.954809756	-1.032943298	-2.998020796	0.010217413	-1.568142731	-0.804348643	1.368372038	1.211918765	0.603470624	-1.092857156	0.758136008	0.209267873	1.117953259	0.508057465	-0.394875486	0.965610478	-0.892205847	-1.501786817	0.713488578	-1.33442315	-0.704730028	-0.842592259	-0.902393588	0.343824517	0.785662535	0.823319923	-0.571095686	-1.255660378	0.071581727	1.184000049	1.032943298	1.993601218	-0.293654744	1.642224543	-0.462083086	-1.080563549	-1.697120332	-1.545263217	0.078412413	0.251237576	-0.852346618	-0.43197323	-0.954809756
AC200057.4_FG007	0.976525035	1.130769373	1.032943298	1.170380633	0.628171949	1.009990169	1.441453795	-1.385954264	-0.462083086	1.993601218	-0.492617885	1.902810954	0.181496015	0.794970891	1.105318189	1.021399468	0.071581727	-1.825439172	-1.460977052	0.119484771	-1.902810954	-1.021399468	1.368372038	0.83291742	2.645701413	-0.539308633	-0.555132042	0.882109877	0.555132042	-0.119484771	-2.249880663	0.003405752	0.872103029	-1.009990169	-0.105775004	0.037471962	0.017029548	1.403975696	-0.112627241	1.757666049	-1.545263217	-0.678771572	-1.368372038	-0.343824517	0.74010031	0.462083086	-1.790524917	-0.83291742	-0.823319923
AC197705.4_FG011	1.441453795	0.402250065	0.336607179	0.83291742	0.293654744	1.697120332	0.628171949	-0.35105981	-2.645701413	0.462083086	-1.286210621	2.345104662	-1.068431117	-0.071581727	-0.862182757	0.09208509	1.068431117	1.591873889	0.258273739	1.130769373	-0.446977502	-0.603470624	-1.946202375	-0.003405752	-0.030656506	-0.037471962	1.056453949	-0.785662535	0.7490877	0.133217035	0.394875486	1.226239142	1.48107362	-1.368372038	-0.286550499	1.368372038	-0.477294855	0.603470624	0.140092436	0.902393588	-1.130769373	-0.167663737	-0.372878156	-0.508057465	-0.064754379	0.923055543	0.064754379	-1.080563549	-0.823319923
GRMZM2G135703	-0.153863466	-0.244213829	-0.484942137	0.195363108	-0.402250065	-0.619896262	1.757666049	-0.105775004	0.619896262	0.209267873	0.322224522	-0.462083086	-0.7490877	-0.023842473	0.794970891	0.722302208	0.933535639	1.105318189	0.696025208	0.064754379	-1.197842699	-1.130769373	1.993601218	-0.603470624	-1.669043821	0.661717677	-1.092857156	0.91267586	-1.021399468	1.403975696	1.270787244	0.051108415	0.842592259	-1.270787244	0.057930049	-0.365586148	-0.265322712	-0.587206217	1.568142731	0.500322766	-0.064754379	-1.318010897	0.244213829	-0.477294855	-0.315058297	-2.998020796	-0.823319923	-0.119484771	-1.33442315
GRMZM2G132632	0.776421761	-0.030656506	0.813797671	0.202310601	-0.209267873	-0.265322712	0.944119285	-0.160759774	1.092857156	-0.394875486	-0.446977502	-0.417065588	0.758136008	0.687372812	0.83291742	-2.998020796	-0.43197323	-0.010217413	-0.237202109	0.595318735	-0.579132162	-2.468001988	1.143773961	-0.153863466	0.998710851	-0.872103029	1.270787244	0.767246816	0.251237576	1.642224543	0.872103029	-0.35105981	0.003405752	-2.249880663	-0.492617885	-2.171527717	1.460977052	-0.678771572	-2.104600628	1.825439172	-0.722302208	0.43197323	0.51582268	1.197842699	1.318010897	0.619896262	-0.785662535	-0.329407333	1.403975696
GRMZM2G325629	1.068431117	0.35105981	1.143773961	-2.998020796	0.146974467	0.300773842	0.462083086	2.998020796	-2.645701413	0.6448541	-2.468001988	-2.345104662	1.591873889	0.044289159	0.619896262	0.251237576	-0.216235289	0.628171949	-2.171527717	-2.104600628	-2.045954276	0.140092436	-1.993601218	0.051108415	0.767246816	0.571095686	-0.057930049	0.477294855	2.045954276	1.211918765	1.862731867	-1.902810954	0.010217413	0.872103029	0.587206217	-1.825439172	0.119484771	-1.757666049	1.726602201	1.642224543	1.117953259	1.270787244	0.322224522	-1.726602201	0.965610478	0.439462999	0.555132042	-1.697120332	-1.669043821
GRMZM5G841684	-0.037471962	2.249880663	0.661717677	0.160759774	-0.023842473	-2.998020796	2.345104662	-2.645701413	-2.249880663	-2.171527717	-2.104600628	2.998020796	2.171527717	1.143773961	-1.946202375	0.272384894	0.439462999	1.021399468	-1.902810954	-1.862731867	0.146974467	-1.825439172	-1.790524917	0.484942137	1.697120332	0.446977502	0.611662814	-1.726602201	0.91267586	0.563095926	0.713488578	0.380190046	1.642224543	-1.642224543	-1.616536998	-1.591873889	0.140092436	-1.568142731	1.545263217	0.469675385	0.181496015	1.946202375	-1.545263217	-1.523165155	0.119484771	1.422465003	-1.501786817	-1.48107362	0.51582268
GRMZM2G002805	0.010217413	0.265322712	-0.595318735	-0.579132162	-1.757666049	-1.545263217	0.794970891	-1.385954264	0.35105981	-1.240815502	-1.902810954	-1.33442315	0.146974467	-0.776421761	-1.946202375	0.085246759	-1.403975696	-1.301946185	-1.056453949	-0.272384894	-1.117953259	-1.591873889	-0.636490883	-2.104600628	0.462083086	0.484942137	-0.146974467	2.645701413	0.813797671	0.653262666	-2.249880663	0.661717677	2.249880663	-0.722302208	0.731172307	-1.009990169	-1.726602201	1.441453795	-1.092857156	1.068431117	0.477294855	-1.170380633	0.91267586	0.696025208	1.568142731	0.153863466	0.670220259	-0.358313528	0.976525035
GRMZM2G025294	-0.842592259	-0.670220259	-0.804348643	-0.469675385	-0.933535639	-0.7490877	0.265322712	-0.105775004	-2.998020796	1.368372038	-1.301946185	0.842592259	-0.023842473	-0.098927729	-1.825439172	-0.944119285	0.954809756	0.678771572	-0.424507616	-0.051108415	-0.372878156	-0.6448541	-1.790524917	-1.862731867	0.279460686	-1.523165155	-0.523619123	-1.105318189	-0.661717677	0.987557182	0.6448541	-0.126347925	-0.223213218	2.998020796	-0.611662814	0.872103029	0.823319923	-0.539308633	-0.237202109	-0.872103029	-1.170380633	0.365586148	1.092857156	0.892205847	0.071581727	0.258273739	-0.030656506	0.119484771	-0.563095926
GRMZM2G150374	0.244213829	0.954809756	-0.153863466	0.6448541	0.722302208	-1.318010897	0.394875486	-0.571095686	-2.468001988	0.813797671	-1.211918765	1.902810954	1.270787244	0.216235289	-1.403975696	-1.726602201	0.258273739	0.286550499	0.119484771	-0.563095926	-0.424507616	0.057930049	-0.037471962	0.037471962	0.358313528	-1.117953259	-1.143773961	-0.223213218	0.329407333	1.993601218	1.568142731	-0.923055543	-0.146974467	-0.315058297	-0.477294855	0.7490877	0.547203211	0.794970891	1.825439172	0.611662814	-2.045954276	-0.064754379	-0.216235289	-0.010217413	1.184000049	-0.286550499	-0.09208509	-0.181496015	0.923055543
GRMZM2G119650	-1.460977052	-0.322224522	0.902393588	-0.279460686	1.080563549	0.804348643	0.531447525	0.105775004	-2.998020796	-0.6448541	-1.068431117	-1.993601218	-1.790524917	0.6448541	-1.757666049	-1.009990169	-1.697120332	0.670220259	2.171527717	-0.387522319	-1.441453795	-0.462083086	-0.603470624	-0.987557182	-0.91267586	-0.628171949	-1.211918765	-0.010217413	-0.933535639	-0.417065588	0.35105981	-0.174575701	0.611662814	1.270787244	0.209267873	1.044626445	1.255660378	0.098927729	-0.293654744	-0.394875486	0.372878156	-0.954809756	0.508057465	0.365586148	-0.74010031	-0.105775004	-0.044289159	0.216235289	-1.946202375
GRMZM2G179143	1.825439172	-0.670220259	0.446977502	-0.365586148	0.91267586	1.286210621	-0.336607179	1.902810954	2.998020796	-2.645701413	-0.628171949	0.010217413	-2.468001988	0.670220259	-0.105775004	0.508057465	1.170380633	0.202310601	-2.249880663	1.240815502	-2.104600628	0.998710851	0.424507616	1.946202375	-0.279460686	1.790524917	0.678771572	-0.202310601	0.794970891	0.195363108	-0.492617885	-0.394875486	-0.531447525	1.441453795	1.48107362	1.211918765	0.017029548	-1.946202375	-1.902810954	2.468001988	0.293654744	0.044289159	-1.862731867	-1.825439172	-1.790524917	-1.757666049	-1.726602201	-0.469675385	-0.462083086
GRMZM2G174572	1.33442315	0.071581727	0.696025208	0.687372812	0.678771572	1.117953259	-0.251237576	-0.098927729	-2.998020796	1.568142731	-0.619896262	0.6448541	1.211918765	0.322224522	-0.010217413	-0.696025208	0.91267586	0.126347925	0.43197323	0.484942137	-1.080563549	-0.051108415	-1.105318189	0.439462999	0.300773842	-0.628171949	-0.45451733	-0.244213829	1.669043821	0.160759774	2.045954276	1.056453949	0.188425032	-1.825439172	1.318010897	1.156974916	0.105775004	-0.758136008	-0.336607179	1.226239142	-1.318010897	-0.477294855	-1.616536998	-1.130769373	-0.563095926	-0.394875486	-1.170380633	-0.954809756	-0.424507616
GRMZM2G449496	2.249880663	-2.998020796	-2.645701413	0.279460686	1.032943298	0.804348643	1.080563549	-0.272384894	1.286210621	-0.209267873	0.202310601	2.468001988	0.944119285	-0.044289159	0.555132042	1.211918765	1.501786817	0.181496015	-0.469675385	1.523165155	0.547203211	-0.09208509	1.197842699	-0.882109877	0.539308633	0.017029548	-0.251237576	-0.023842473	1.056453949	1.385954264	0.244213829	0.6448541	0.365586148	-0.531447525	0.933535639	-0.687372812	0.265322712	0.722302208	1.726602201	-0.146974467	-0.417065588	-0.579132162	1.757666049	-2.171527717	1.068431117	-2.104600628	1.170380633	-2.045954276	1.460977052
GRMZM2G006216	-0.188425032	1.351202935	0.439462999	-0.923055543	-0.722302208	0.216235289	1.156974916	-1.301946185	-1.790524917	-0.336607179	-0.976525035	1.993601218	1.902810954	-0.010217413	-2.468001988	-0.003405752	0.696025208	0.998710851	-0.098927729	-0.35105981	0.160759774	-1.48107362	-2.104600628	-1.757666049	1.568142731	-0.181496015	0.678771572	1.301946185	0.057930049	2.249880663	0.484942137	-0.555132042	1.021399468	-1.105318189	-0.051108415	0.307908216	0.322224522	1.197842699	1.368372038	0.933535639	-0.74010031	0.35105981	-0.446977502	-0.45451733	0.661717677	2.171527717	-0.462083086	-0.508057465	-0.965610478
GRMZM2G112244	-1.156974916	0.43197323	-0.064754379	-1.385954264	0.776421761	-0.595318735	0.603470624	-0.017029548	0.188425032	1.501786817	-0.74010031	1.318010897	0.030656506	0.704730028	0.003405752	1.460977052	-0.394875486	0.563095926	-0.965610478	0.051108415	-0.272384894	-0.424507616	1.351202935	0.098927729	-1.422465003	0.010217413	-0.146974467	0.477294855	0.713488578	-0.315058297	-0.933535639	-0.365586148	0.358313528	-1.825439172	-1.33442315	0.758136008	0.823319923	-0.244213829	-2.468001988	1.616536998	-1.790524917	0.251237576	-1.460977052	-1.902810954	-0.237202109	0.923055543	-0.661717677	0.954809756	0.892205847
GRMZM2G122481	0.216235289	-0.09208509	-1.33442315	0.45451733	0.794970891	-1.669043821	-0.146974467	-1.117953259	-0.628171949	0.6448541	0.823319923	-0.237202109	0.776421761	0.030656506	-0.387522319	-0.500322766	0.272384894	-0.882109877	1.403975696	-0.872103029	-2.249880663	-0.611662814	2.249880663	-0.587206217	0.713488578	-0.758136008	-1.156974916	1.211918765	0.181496015	1.790524917	0.91267586	-0.174575701	0.804348643	0.446977502	-0.83291742	-0.794970891	-0.767246816	1.255660378	-0.272384894	0.307908216	-1.993601218	-0.279460686	1.642224543	1.862731867	0.119484771	0.731172307	-0.293654744	0.933535639	0.051108415
AC185501.3_FG006	-2.998020796	-0.230202032	-2.645701413	0.010217413	-0.462083086	0.661717677	-0.195363108	0.133217035	-2.249880663	1.591873889	-0.372878156	2.045954276	0.933535639	0.619896262	0.678771572	0.085246759	0.758136008	0.315058297	-2.104600628	1.403975696	0.409646587	0.563095926	-0.469675385	0.237202109	-2.045954276	0.555132042	-0.030656506	0.523619123	-1.946202375	0.112627241	0.954809756	1.170380633	-0.209267873	0.804348643	0.272384894	1.385954264	-1.862731867	-1.825439172	-0.508057465	1.270787244	0.670220259	-1.790524917	-1.757666049	0.813797671	0.372878156	-0.044289159	-0.380190046	-1.726602201	0.6448541
GRMZM5G827207	-2.998020796	-0.446977502	0.965610478	0.105775004	1.117953259	-2.645701413	-0.244213829	-2.468001988	1.170380633	-2.345104662	2.468001988	2.171527717	-0.126347925	-2.171527717	2.249880663	0.188425032	-2.104600628	-2.045954276	-1.993601218	-1.946202375	-1.825439172	-1.790524917	0.91267586	-1.757666049	0.704730028	0.6448541	-0.329407333	-0.071581727	-1.726602201	-0.140092436	-1.697120332	0.044289159	1.403975696	-1.616536998	-1.591873889	-1.568142731	-1.545263217	-1.523165155	-1.501786817	1.568142731	0.469675385	1.270787244	-1.48107362	-1.460977052	-0.365586148	1.009990169	-1.441453795	-1.422465003	-0.195363108
GRMZM2G106653	0.571095686	1.021399468	-0.508057465	0.230202032	0.523619123	1.092857156	-0.307908216	-0.023842473	-2.468001988	0.603470624	-0.6448541	2.045954276	1.616536998	-0.279460686	-0.713488578	-0.492617885	1.255660378	1.993601218	-1.156974916	1.226239142	0.776421761	0.358313528	-1.862731867	0.469675385	0.794970891	-0.661717677	0.477294855	-1.757666049	0.653262666	0.315058297	0.272384894	-0.051108415	-0.653262666	-0.976525035	0.244213829	1.642224543	0.446977502	-0.146974467	-0.343824517	0.202310601	-0.882109877	0.402250065	-1.368372038	-1.068431117	0.424507616	0.409646587	0.216235289	-0.365586148	0.085246759
GRMZM2G397339	0.704730028	-2.998020796	-2.645701413	-0.023842473	-2.468001988	1.156974916	-2.345104662	0.293654744	-2.104600628	0.43197323	-0.064754379	-2.045954276	0.112627241	-1.946202375	0.83291742	0.071581727	-1.902810954	-1.862731867	0.358313528	0.251237576	-0.037471962	0.892205847	-1.790524917	-1.757666049	0.469675385	-1.726602201	-1.642224543	-1.616536998	-1.591873889	0.085246759	-1.568142731	-1.523165155	0.023842473	1.368372038	-0.146974467	-0.140092436	0.500322766	-1.48107362	-1.460977052	-1.441453795	1.422465003	-1.422465003	-1.403975696	-1.385954264	-0.057930049	-1.368372038	0.713488578	-1.351202935	-1.33442315
GRMZM2G110027	-0.731172307	0.030656506	-0.244213829	-0.153863466	1.197842699	-0.91267586	-0.492617885	-1.021399468	1.460977052	-0.365586148	-0.146974467	1.523165155	1.368372038	-0.078412413	-0.579132162	0.293654744	0.965610478	1.143773961	1.068431117	-1.068431117	1.105318189	-1.143773961	-1.902810954	0.500322766	-0.587206217	0.670220259	0.83291742	1.48107362	0.91267586	-0.954809756	-1.545263217	-0.35105981	0.477294855	-0.43197323	-0.237202109	-0.944119285	-1.697120332	-0.251237576	-0.195363108	-1.170380633	-1.862731867	0.446977502	1.726602201	0.923055543	1.009990169	0.372878156	-1.270787244	0.315058297	0.195363108
GRMZM2G138676	1.068431117	-0.272384894	1.642224543	0.539308633	0.492617885	1.143773961	-0.315058297	-0.133217035	-2.249880663	-0.394875486	-1.197842699	-0.119484771	-1.726602201	0.83291742	-1.056453949	-0.223213218	1.385954264	-0.587206217	1.021399468	-0.484942137	-1.403975696	1.226239142	-1.318010897	-0.758136008	0.687372812	0.037471962	0.484942137	-1.790524917	-0.188425032	-1.545263217	0.343824517	0.523619123	-0.823319923	-0.174575701	0.300773842	1.993601218	-0.696025208	0.446977502	-0.417065588	0.595318735	0.402250065	-0.43197323	-1.48107362	-1.143773961	-0.365586148	0.785662535	-0.343824517	-1.286210621	-0.181496015
GRMZM2G076394	0.923055543	1.616536998	-0.279460686	-0.216235289	-0.010217413	0.098927729	-0.469675385	0.343824517	-1.080563549	0.424507616	0.678771572	0.051108415	0.484942137	-0.387522319	-0.484942137	-0.998710851	0.722302208	0.188425032	-1.825439172	0.237202109	0.7490877	2.468001988	-1.523165155	1.591873889	-0.670220259	1.056453949	0.315058297	0.216235289	0.696025208	1.757666049	0.965610478	-0.167663737	0.477294855	-1.197842699	0.998710851	0.852346618	-1.255660378	1.825439172	-0.09208509	0.380190046	-1.105318189	-1.545263217	0.571095686	-0.140092436	0.954809756	0.619896262	-0.380190046	-1.021399468	0.462083086
GRMZM2G098011	1.385954264	-0.365586148	0.044289159	0.678771572	-0.322224522	0.181496015	0.823319923	-0.307908216	-1.946202375	0.587206217	-0.776421761	0.508057465	-0.258273739	-0.098927729	-0.862182757	-0.872103029	0.547203211	0.446977502	-1.616536998	0.696025208	-2.249880663	-1.993601218	-1.156974916	-0.636490883	-0.439462999	0.017029548	0.563095926	-0.500322766	0.343824517	-0.492617885	1.568142731	1.130769373	0.439462999	-1.825439172	-0.051108415	0.279460686	-0.619896262	-1.757666049	-1.385954264	0.43197323	-0.51582268	-0.571095686	0.424507616	-0.071581727	0.944119285	0.119484771	-0.044289159	0.402250065	-0.409646587
GRMZM5G838475	-2.998020796	-2.645701413	-2.468001988	0.051108415	0.237202109	-2.345104662	0.244213829	-0.071581727	-2.171527717	-2.104600628	-2.045954276	0.611662814	-1.993601218	0.272384894	0.394875486	-0.030656506	1.032943298	0.119484771	-1.902810954	2.468001988	-1.790524917	-1.757666049	0.628171949	0.872103029	0.105775004	-1.726602201	0.380190046	-1.697120332	-1.669043821	0.91267586	-1.642224543	-1.616536998	0.230202032	-1.523165155	0.83291742	0.223213218	-1.501786817	-1.460977052	0.174575701	1.48107362	-1.441453795	2.104600628	-1.422465003	-1.403975696	-1.385954264	0.365586148	1.862731867	2.249880663	2.171527717
GRMZM2G327206	0.794970891	1.368372038	-2.998020796	-2.645701413	-2.468001988	-2.345104662	0.933535639	-2.249880663	-2.104600628	-2.045954276	-1.993601218	0.071581727	0.628171949	-1.862731867	-1.825439172	-0.071581727	-1.790524917	1.286210621	0.653262666	0.987557182	-1.726602201	-1.697120332	-1.669043821	-1.642224543	0.126347925	-1.616536998	0.661717677	0.944119285	1.568142731	0.7490877	0.446977502	-1.568142731	1.460977052	-1.501786817	-1.48107362	0.555132042	-1.460977052	-1.422465003	1.591873889	1.105318189	-1.403975696	0.923055543	1.616536998	1.056453949	0.315058297	1.197842699	2.345104662	0.244213829	2.104600628
GRMZM2G025322	-0.508057465	0.965610478	0.628171949	-0.587206217	-0.611662814	-0.83291742	0.704730028	0.230202032	-2.249880663	-0.380190046	-1.211918765	-0.523619123	1.523165155	-0.462083086	-0.933535639	-0.731172307	-0.7490877	-0.119484771	0.51582268	0.611662814	-0.469675385	-0.477294855	1.790524917	-0.484942137	1.993601218	-1.270787244	-0.167663737	0.579132162	0.823319923	1.184000049	0.105775004	-0.409646587	0.872103029	-0.402250065	-0.315058297	0.133217035	-0.6448541	0.119484771	0.030656506	0.603470624	-2.998020796	1.946202375	1.902810954	0.209267873	1.032943298	1.143773961	-0.030656506	1.080563549	-0.343824517
GRMZM2G081888	1.068431117	-0.424507616	-0.209267873	-0.804348643	-0.010217413	0.085246759	0.071581727	-0.057930049	1.286210621	0.563095926	-0.813797671	0.064754379	-0.539308633	0.202310601	-0.531447525	-1.568142731	-0.43197323	-0.279460686	-1.105318189	0.417065588	-1.080563549	-1.032943298	0.628171949	0.322224522	-1.545263217	0.722302208	0.119484771	-0.003405752	0.188425032	0.531447525	1.211918765	1.757666049	-0.195363108	-1.862731867	-0.587206217	-1.48107362	0.767246816	-0.462083086	0.446977502	1.056453949	-0.998710851	-0.023842473	-0.976525035	-0.286550499	0.300773842	1.501786817	-0.126347925	1.044626445	0.500322766
GRMZM2G442128	-2.998020796	0.767246816	0.057930049	-0.237202109	-2.645701413	0.209267873	0.126347925	-1.156974916	-2.468001988	-2.345104662	-2.249880663	1.318010897	2.104600628	0.539308633	1.156974916	0.785662535	0.315058297	0.380190046	-0.446977502	-0.767246816	-0.882109877	-1.130769373	-0.188425032	-0.098927729	-2.104600628	-0.7490877	-0.636490883	-0.531447525	-1.993601218	-0.372878156	-0.307908216	0.085246759	-0.394875486	0.160759774	-0.954809756	-1.946202375	-0.402250065	-0.43197323	2.345104662	0.579132162	0.307908216	1.240815502	-1.902810954	-1.080563549	-0.852346618	-0.842592259	0.91267586	-0.315058297	1.697120332
GRMZM2G032977	1.545263217	1.009990169	0.329407333	0.678771572	0.477294855	-0.188425032	-0.555132042	-1.862731867	-0.244213829	1.117953259	1.501786817	1.591873889	2.468001988	-0.976525035	-0.251237576	-0.484942137	-1.48107362	-1.726602201	1.044626445	-0.785662535	0.105775004	0.492617885	1.351202935	2.045954276	0.661717677	0.523619123	-0.571095686	-0.35105981	-1.056453949	-0.279460686	-0.531447525	0.010217413	0.223213218	-0.794970891	-0.653262666	-0.160759774	0.469675385	0.987557182	1.080563549	1.993601218	-0.587206217	-0.417065588	0.563095926	-0.265322712	1.056453949	0.160759774	-0.051108415	-0.387522319	-2.104600628
GRMZM2G466532	-0.51582268	0.044289159	2.249880663	-0.322224522	-0.500322766	0.167663737	0.508057465	-0.579132162	2.998020796	-2.998020796	-0.153863466	1.105318189	0.563095926	-0.794970891	-2.345104662	-0.477294855	0.394875486	0.611662814	-2.249880663	-0.687372812	1.523165155	-0.258273739	1.501786817	-2.104600628	0.237202109	-2.045954276	0.071581727	0.244213829	-0.037471962	0.531447525	-0.030656506	-0.188425032	0.140092436	0.010217413	-1.902810954	0.823319923	0.078412413	2.345104662	-1.862731867	0.555132042	-1.825439172	-1.790524917	-1.757666049	-1.726602201	-0.696025208	-0.35105981	-1.697120332	-0.417065588	0.43197323
GRMZM2G167247	0.731172307	-0.823319923	-0.731172307	0.279460686	0.987557182	1.270787244	0.300773842	-0.469675385	-2.645701413	1.422465003	-0.758136008	0.722302208	-0.424507616	-0.595318735	-0.704730028	-0.45451733	0.315058297	1.616536998	-1.726602201	0.7490877	0.051108415	0.45451733	-1.993601218	0.91267586	0.343824517	-0.293654744	0.794970891	-1.902810954	-0.174575701	-0.902393588	0.758136008	0.322224522	0.696025208	-0.91267586	0.51582268	0.882109877	0.636490883	-0.329407333	0.153863466	-0.153863466	0.293654744	-0.563095926	-0.531447525	-0.636490883	0.83291742	0.09208509	-0.785662535	-0.258273739	-0.872103029
GRMZM2G077776	-0.587206217	0.051108415	1.591873889	0.358313528	0.098927729	0.112627241	-0.037471962	-0.923055543	2.645701413	1.270787244	-0.484942137	-0.071581727	1.211918765	1.790524917	-0.45451733	-0.547203211	0.037471962	1.021399468	-2.645701413	0.439462999	-2.345104662	-0.872103029	-0.579132162	-0.315058297	-0.6448541	0.237202109	-2.249880663	-0.181496015	-0.387522319	-0.508057465	-2.171527717	0.477294855	1.117953259	-0.126347925	-0.661717677	1.184000049	-2.104600628	-2.045954276	-0.892205847	-0.687372812	-0.704730028	-0.300773842	-1.993601218	0.523619123	0.409646587	1.545263217	-0.492617885	0.244213829	0.45451733
GRMZM5G872234	-0.776421761	1.568142731	-0.653262666	-0.678771572	-0.965610478	-0.7490877	0.902393588	-0.469675385	-2.998020796	-0.902393588	-0.595318735	0.365586148	0.484942137	0.661717677	-1.726602201	-0.539308633	0.044289159	2.468001988	-0.078412413	1.092857156	-0.387522319	-1.545263217	-0.223213218	-0.508057465	1.403975696	0.098927729	-0.300773842	0.45451733	0.085246759	1.669043821	0.030656506	1.009990169	0.823319923	0.794970891	0.343824517	0.037471962	0.174575701	1.757666049	0.105775004	-0.244213829	-0.188425032	-0.6448541	1.591873889	-0.119484771	-0.315058297	-0.209267873	0.279460686	-0.661717677	0.195363108
GRMZM5G877188	-0.209267873	0.153863466	0.358313528	0.251237576	-2.998020796	-2.645701413	-0.202310601	0.112627241	-2.345104662	-2.249880663	-0.126347925	-2.171527717	0.523619123	-2.045954276	0.83291742	-1.993601218	-1.946202375	-1.902810954	-1.862731867	0.078412413	1.130769373	0.003405752	-1.790524917	0.365586148	1.368372038	-0.223213218	-0.078412413	-1.757666049	0.462083086	-1.726602201	-1.697120332	-0.017029548	-1.642224543	-0.133217035	-1.591873889	-1.568142731	1.825439172	0.842592259	-1.545263217	1.642224543	0.146974467	0.813797671	1.568142731	0.758136008	1.170380633	1.226239142	0.767246816	0.923055543	0.661717677
GRMZM2G105579	0.944119285	-0.126347925	-0.687372812	0.687372812	1.056453949	1.825439172	-0.555132042	-0.678771572	-2.104600628	0.653262666	0.112627241	1.946202375	0.51582268	-0.167663737	-1.301946185	-0.307908216	1.156974916	1.726602201	-0.202310601	1.068431117	-0.462083086	-0.611662814	-1.545263217	-0.105775004	0.409646587	0.531447525	0.387522319	-0.852346618	0.394875486	-0.387522319	1.568142731	0.508057465	0.987557182	0.446977502	-0.794970891	1.902810954	-0.146974467	-1.184000049	-1.056453949	0.358313528	0.758136008	0.202310601	-0.322224522	-0.944119285	-0.064754379	0.477294855	-1.422465003	-1.032943298	0.085246759
GRMZM2G099056	2.998020796	0.409646587	-0.547203211	-0.244213829	0.636490883	0.842592259	0.237202109	-0.174575701	-2.645701413	1.697120332	-0.030656506	0.944119285	1.226239142	-0.555132042	0.954809756	0.603470624	1.032943298	1.021399468	-1.368372038	1.240815502	-0.181496015	2.104600628	-1.862731867	1.726602201	0.687372812	-0.882109877	-0.098927729	-1.790524917	-0.223213218	-0.794970891	0.181496015	0.387522319	-0.462083086	-0.91267586	1.616536998	1.946202375	0.085246759	-0.140092436	0.508057465	0.244213829	-0.044289159	-0.492617885	-0.167663737	-0.696025208	0.293654744	-0.670220259	-0.892205847	-0.785662535	-1.240815502
GRMZM2G125507	-1.790524917	0.696025208	2.249880663	-0.365586148	-0.146974467	-0.51582268	0.704730028	-2.998020796	0.329407333	-0.057930049	-2.645701413	1.105318189	0.492617885	-0.653262666	-1.757666049	-2.249880663	-0.286550499	0.446977502	-0.188425032	0.579132162	-0.508057465	-1.422465003	0.51582268	-1.105318189	1.862731867	-0.424507616	-0.09208509	0.670220259	0.43197323	1.021399468	0.469675385	-0.446977502	0.563095926	-2.171527717	-0.571095686	-1.368372038	-0.804348643	-0.017029548	1.757666049	0.74010031	-1.170380633	1.211918765	0.365586148	1.351202935	1.616536998	-0.064754379	-0.112627241	1.170380633	0.030656506
GRMZM5G829297	0.484942137	0.722302208	-1.697120332	0.767246816	2.104600628	-1.523165155	0.965610478	-1.197842699	-2.345104662	1.946202375	0.394875486	1.255660378	1.021399468	0.358313528	-1.184000049	-0.265322712	1.056453949	0.563095926	0.43197323	0.813797671	-1.501786817	0.492617885	-2.045954276	0.003405752	0.469675385	-0.611662814	-0.965610478	-0.43197323	-0.003405752	0.587206217	1.368372038	-0.380190046	0.636490883	-0.6448541	0.315058297	0.7490877	0.678771572	-0.071581727	1.697120332	0.230202032	-0.678771572	-1.056453949	0.862182757	0.758136008	0.704730028	1.143773961	-0.153863466	0.279460686	0.223213218
GRMZM2G162333	-0.251237576	0.722302208	0.611662814	-0.085246759	0.43197323	1.441453795	0.265322712	-1.032943298	-0.300773842	0.153863466	0.237202109	-0.713488578	-0.484942137	-0.223213218	-1.862731867	-0.933535639	0.7490877	1.318010897	1.143773961	1.862731867	-1.642224543	0.619896262	1.501786817	-0.661717677	2.171527717	-0.174575701	0.987557182	0.785662535	1.197842699	-0.237202109	0.336607179	0.91267586	0.872103029	-0.862182757	0.251237576	1.105318189	0.365586148	0.300773842	-1.501786817	1.270787244	1.301946185	-1.825439172	-1.318010897	-1.403975696	-0.6448541	-0.998710851	-0.500322766	-0.35105981	0.112627241
GRMZM2G351307	1.351202935	0.293654744	-2.998020796	0.181496015	0.372878156	-2.645701413	1.523165155	-0.862182757	-2.468001988	0.380190046	1.226239142	0.571095686	-2.345104662	1.568142731	0.579132162	2.045954276	0.892205847	0.794970891	1.993601218	1.286210621	-0.307908216	-0.6448541	-2.104600628	0.044289159	-0.872103029	1.056453949	0.531447525	-2.045954276	1.092857156	-1.993601218	-0.484942137	-0.704730028	-1.946202375	-0.078412413	-1.032943298	-0.336607179	0.057930049	0.469675385	-0.380190046	0.74010031	0.704730028	-0.785662535	-1.862731867	-0.174575701	-0.167663737	0.051108415	0.315058297	-1.825439172	-0.258273739
GRMZM2G096165	-0.286550499	-0.628171949	0.010217413	-0.119484771	1.170380633	-0.279460686	0.813797671	-0.272384894	-0.064754379	0.477294855	0.661717677	0.611662814	1.044626445	0.484942137	-0.098927729	-0.09208509	0.098927729	0.003405752	1.757666049	1.993601218	-1.946202375	-1.403975696	0.500322766	-0.74010031	0.902393588	-0.439462999	-1.568142731	1.009990169	1.021399468	0.358313528	-2.345104662	-0.251237576	0.230202032	1.068431117	-0.044289159	-0.722302208	-0.057930049	0.547203211	-0.417065588	-0.051108415	-1.545263217	-0.174575701	1.669043821	1.591873889	0.380190046	-0.794970891	1.226239142	1.092857156	0.944119285
GRMZM2G158130	0.216235289	1.240815502	0.603470624	-1.105318189	-1.197842699	-0.462083086	-0.587206217	-0.051108415	2.345104662	-0.085246759	0.010217413	0.785662535	1.591873889	-1.545263217	-1.080563549	-0.343824517	0.133217035	0.272384894	0.954809756	1.255660378	-0.862182757	-0.842592259	0.258273739	-0.251237576	0.933535639	-0.653262666	0.704730028	2.104600628	2.171527717	1.902810954	1.757666049	0.619896262	0.365586148	-1.032943298	-1.591873889	-0.167663737	-0.477294855	-0.315058297	0.279460686	0.358313528	-0.804348643	0.539308633	0.595318735	1.862731867	0.251237576	0.696025208	-0.872103029	-0.365586148	0.500322766
AC217401.3_FG002	-0.892205847	-0.687372812	0.286550499	2.249880663	-1.368372038	-0.933535639	0.678771572	-0.539308633	-2.171527717	-0.954809756	-1.197842699	-0.611662814	-0.126347925	-0.704730028	1.170380633	-0.555132042	-0.776421761	-0.160759774	-0.188425032	0.628171949	-1.301946185	-0.987557182	1.460977052	-0.547203211	-0.293654744	-1.790524917	-0.619896262	1.523165155	0.146974467	1.790524917	1.862731867	0.696025208	0.571095686	-0.167663737	0.315058297	0.372878156	0.523619123	0.776421761	-0.153863466	0.731172307	0.202310601	-0.085246759	-0.064754379	-0.424507616	-0.003405752	0.954809756	0.402250065	0.160759774	-0.098927729
GRMZM2G039900	-0.661717677	0.057930049	-0.767246816	-0.547203211	-1.993601218	-1.862731867	0.531447525	-1.170380633	-1.946202375	-1.48107362	-0.687372812	0.492617885	0.51582268	-0.713488578	-0.998710851	-1.523165155	-0.531447525	0.119484771	1.009990169	0.329407333	-0.704730028	-1.068431117	0.372878156	-1.642224543	1.385954264	-0.987557182	-0.112627241	1.130769373	-0.010217413	0.300773842	0.987557182	-0.133217035	1.092857156	-1.009990169	-1.501786817	0.223213218	0.417065588	1.368372038	0.547203211	0.785662535	0.272384894	-0.45451733	2.998020796	1.286210621	1.441453795	1.862731867	0.539308633	0.477294855	1.669043821
AC199526.5_FG003	2.104600628	-0.017029548	1.255660378	-0.696025208	1.092857156	2.998020796	-0.023842473	-0.785662535	0.174575701	-1.403975696	-1.143773961	-0.484942137	-1.021399468	-0.160759774	-0.133217035	-0.492617885	1.143773961	0.195363108	-0.251237576	1.068431117	-0.174575701	0.636490883	-1.825439172	0.078412413	0.539308633	0.051108415	0.469675385	-0.167663737	0.307908216	-0.417065588	0.902393588	0.315058297	0.713488578	-0.307908216	0.51582268	-0.119484771	0.153863466	0.258273739	-2.468001988	1.591873889	0.279460686	-0.661717677	-0.146974467	-1.226239142	-0.230202032	0.523619123	-0.209267873	0.987557182	0.670220259
GRMZM2G032154	1.368372038	0.409646587	-0.315058297	1.642224543	-0.258273739	-1.403975696	1.301946185	-1.170380633	1.044626445	0.329407333	0.51582268	0.687372812	0.563095926	-0.954809756	-0.017029548	-0.119484771	-0.322224522	-0.477294855	0.579132162	0.653262666	-0.402250065	-0.998710851	0.43197323	0.402250065	0.611662814	0.251237576	-1.862731867	1.726602201	-0.628171949	0.923055543	-0.010217413	-0.579132162	-0.380190046	-1.130769373	-0.852346618	0.424507616	-0.51582268	1.460977052	0.804348643	0.140092436	-0.188425032	0.500322766	1.33442315	0.83291742	0.126347925	0.272384894	0.188425032	0.547203211	0.998710851
GRMZM2G305254	0.813797671	0.587206217	-0.010217413	-0.776421761	-0.653262666	1.068431117	0.286550499	-0.51582268	-2.468001988	0.098927729	-1.255660378	-0.279460686	0.037471962	-0.83291742	-0.462083086	0.336607179	0.343824517	0.174575701	-1.211918765	0.7490877	-0.037471962	-0.174575701	-2.171527717	0.704730028	-0.439462999	0.064754379	0.09208509	0.146974467	0.484942137	0.998710851	1.441453795	-0.160759774	0.394875486	-0.35105981	0.402250065	1.385954264	-0.704730028	0.74010031	0.230202032	0.852346618	-0.804348643	-0.300773842	-0.976525035	-0.823319923	-0.322224522	0.696025208	-1.226239142	0.265322712	0.085246759
AC202011.3_FG010	2.345104662	-2.998020796	0.722302208	0.587206217	1.757666049	0.563095926	0.670220259	-2.645701413	0.010217413	-2.345104662	-0.126347925	0.823319923	-0.500322766	-0.571095686	0.315058297	0.140092436	0.882109877	2.104600628	-2.249880663	1.460977052	-0.670220259	-2.171527717	-0.83291742	1.226239142	-2.104600628	0.146974467	-0.09208509	-0.892205847	1.642224543	-0.51582268	-1.993601218	-1.068431117	-0.237202109	0.244213829	1.092857156	0.91267586	-0.923055543	-0.010217413	-0.842592259	0.35105981	-0.146974467	-1.946202375	-1.902810954	0.358313528	-0.265322712	0.902393588	-1.862731867	0.83291742	0.439462999
GRMZM2G147500	0.923055543	-0.882109877	-1.825439172	-1.351202935	0.133217035	0.670220259	1.021399468	0.030656506	-2.998020796	-0.209267873	-0.322224522	-0.202310601	-0.272384894	-0.003405752	-1.301946185	-0.315058297	0.722302208	0.965610478	-1.105318189	0.998710851	-1.021399468	-0.188425032	-1.669043821	-0.160759774	-0.105775004	0.842592259	1.130769373	-1.697120332	-0.244213829	1.009990169	1.523165155	0.785662535	0.661717677	-1.009990169	0.017029548	1.460977052	0.579132162	-0.300773842	0.43197323	-0.153863466	-1.422465003	-0.037471962	2.249880663	0.892205847	1.240815502	1.226239142	-1.385954264	-0.09208509	0.944119285
GRMZM2G089860	-0.731172307	1.669043821	-0.078412413	-2.171527717	-0.696025208	0.933535639	1.946202375	1.403975696	-2.998020796	0.030656506	-1.403975696	-1.032943298	-0.057930049	-1.021399468	-0.209267873	-0.670220259	1.226239142	1.156974916	0.767246816	0.265322712	-1.156974916	-0.51582268	-1.33442315	-0.933535639	-1.240815502	-1.197842699	0.244213829	2.104600628	0.439462999	-0.628171949	-0.794970891	-1.226239142	2.468001988	0.83291742	-0.43197323	1.092857156	-0.358313528	0.160759774	1.105318189	-0.126347925	0.902393588	0.085246759	1.021399468	-0.153863466	0.628171949	0.044289159	1.460977052	0.563095926	0.944119285
GRMZM2G348956	0.944119285	1.48107362	-0.272384894	1.301946185	-0.365586148	1.270787244	0.417065588	-0.017029548	-2.998020796	1.009990169	-0.140092436	1.351202935	-0.619896262	0.579132162	0.670220259	-0.579132162	0.140092436	-0.265322712	-1.170380633	0.804348643	-0.315058297	1.143773961	1.568142731	-0.153863466	-0.902393588	-0.653262666	0.776421761	-1.591873889	-0.160759774	-1.385954264	-0.636490883	-0.237202109	0.785662535	-0.547203211	0.365586148	0.7490877	0.037471962	2.249880663	-0.704730028	0.976525035	1.591873889	0.057930049	-0.293654744	-1.351202935	-2.045954276	0.555132042	0.595318735	-1.255660378	-0.35105981
GRMZM2G480050	1.501786817	0.09208509	1.946202375	0.223213218	1.757666049	0.286550499	0.237202109	0.653262666	-0.258273739	-2.645701413	1.318010897	-2.468001988	-0.265322712	0.539308633	-2.249880663	0.852346618	-0.387522319	0.329407333	1.568142731	1.460977052	0.74010031	1.255660378	-0.119484771	1.726602201	0.322224522	2.045954276	-2.171527717	-2.104600628	-0.188425032	-2.045954276	0.547203211	2.104600628	0.417065588	-1.946202375	0.813797671	-1.902810954	0.030656506	1.48107362	-1.862731867	-1.825439172	0.661717677	0.636490883	-1.790524917	-1.757666049	0.696025208	0.017029548	0.523619123	-0.064754379	0.365586148
GRMZM2G133978	0.862182757	-0.661717677	-0.767246816	-0.523619123	0.976525035	-2.998020796	-0.078412413	-0.603470624	2.998020796	1.032943298	1.255660378	0.469675385	0.767246816	-0.758136008	-1.211918765	-1.143773961	0.372878156	-1.460977052	-2.645701413	-0.83291742	-1.568142731	-0.439462999	0.571095686	-0.923055543	1.318010897	0.078412413	-0.579132162	1.669043821	1.068431117	0.74010031	-1.105318189	-1.092857156	0.603470624	-0.872103029	-0.500322766	-2.345104662	0.484942137	1.301946185	-0.670220259	0.892205847	-1.184000049	-1.726602201	-0.244213829	0.119484771	1.105318189	-1.056453949	-1.226239142	-0.146974467	1.130769373
GRMZM2G180552	1.368372038	-0.258273739	-0.563095926	-0.300773842	0.244213829	0.237202109	0.462083086	-2.998020796	-0.09208509	2.645701413	1.993601218	0.731172307	0.492617885	0.09208509	-0.603470624	-0.976525035	0.469675385	0.010217413	-2.468001988	0.216235289	-0.146974467	0.329407333	0.279460686	-0.078412413	-0.462083086	1.385954264	0.794970891	0.944119285	0.209267873	0.146974467	-0.484942137	1.591873889	1.143773961	-0.446977502	-2.104600628	-2.045954276	0.45451733	-0.044289159	0.223213218	-0.661717677	-1.946202375	0.112627241	-1.021399468	-1.902810954	-0.619896262	1.726602201	-0.531447525	-0.477294855	-1.092857156
GRMZM2G162065	0.547203211	-0.758136008	-0.051108415	-0.064754379	-0.329407333	-0.678771572	0.417065588	-0.424507616	1.184000049	1.591873889	-0.409646587	0.446977502	0.852346618	-0.587206217	-0.892205847	0.678771572	-0.286550499	-0.446977502	0.365586148	0.09208509	0.315058297	-0.653262666	-0.954809756	0.105775004	-0.842592259	-0.965610478	-1.591873889	1.044626445	-0.394875486	-0.500322766	0.687372812	0.882109877	0.160759774	-0.696025208	0.611662814	0.174575701	0.587206217	0.237202109	0.286550499	0.785662535	-0.7490877	0.153863466	0.500322766	-0.085246759	1.385954264	-0.044289159	-0.731172307	0.258273739	0.794970891
GRMZM5G852877	0.023842473	0.174575701	0.244213829	0.670220259	0.237202109	-0.105775004	0.307908216	-1.403975696	-2.998020796	0.126347925	-0.998710851	1.318010897	-0.140092436	0.160759774	0.195363108	0.230202032	1.197842699	0.976525035	2.045954276	0.628171949	-1.351202935	-0.882109877	-0.531447525	-0.160759774	-0.003405752	-0.611662814	-0.500322766	0.112627241	-0.307908216	1.568142731	1.105318189	0.044289159	1.068431117	-1.211918765	-0.230202032	-1.170380633	0.687372812	0.188425032	0.571095686	0.387522319	-0.462083086	-0.653262666	1.697120332	0.998710851	0.661717677	1.240815502	-0.09208509	0.372878156	0.83291742
GRMZM2G094304	0.579132162	0.078412413	0.923055543	0.387522319	-1.032943298	0.731172307	1.545263217	-0.279460686	1.226239142	1.902810954	-0.872103029	1.825439172	2.045954276	-0.636490883	1.697120332	0.044289159	0.653262666	0.571095686	0.976525035	0.085246759	1.068431117	1.270787244	1.993601218	0.7490877	-1.056453949	-1.255660378	-0.424507616	0.767246816	0.394875486	-0.439462999	-0.595318735	-0.954809756	-0.244213829	-1.757666049	-0.343824517	-2.998020796	0.713488578	0.251237576	1.080563549	0.030656506	-1.825439172	-0.902393588	-2.645701413	-2.045954276	1.403975696	-0.944119285	-0.998710851	1.184000049	-0.230202032
GRMZM2G149809	-0.794970891	0.181496015	0.670220259	1.156974916	-0.998710851	0.133217035	-0.071581727	2.171527717	0.508057465	1.669043821	-1.068431117	1.080563549	0.998710851	-1.270787244	0.244213829	-0.892205847	-1.726602201	-0.555132042	-0.017029548	1.501786817	-2.468001988	-1.105318189	1.105318189	0.188425032	-0.678771572	-0.670220259	0.409646587	0.105775004	-0.804348643	0.492617885	-0.098927729	0.195363108	0.098927729	0.300773842	-0.954809756	1.697120332	-1.255660378	-1.143773961	1.993601218	0.785662535	-0.713488578	-0.167663737	-2.645701413	0.611662814	0.661717677	0.237202109	-2.345104662	0.037471962	0.265322712
GRMZM2G063575	-0.678771572	-0.587206217	1.080563549	0.758136008	-0.322224522	-0.687372812	-0.023842473	0.188425032	2.249880663	1.021399468	0.842592259	1.902810954	-0.057930049	-0.696025208	0.531447525	-1.501786817	0.954809756	0.74010031	-0.153863466	-0.126347925	-0.965610478	0.167663737	0.484942137	-0.776421761	-1.056453949	0.563095926	-0.037471962	0.293654744	0.051108415	1.318010897	2.104600628	1.092857156	0.862182757	-2.468001988	-1.568142731	0.300773842	0.804348643	-0.492617885	-1.226239142	0.722302208	-1.669043821	2.171527717	0.6448541	-0.223213218	-0.202310601	0.872103029	-1.156974916	-0.823319923	-0.933535639
GRMZM2G157350	0.153863466	0.424507616	-2.998020796	1.170380633	1.591873889	-2.645701413	0.167663737	-0.424507616	1.403975696	0.133217035	1.545263217	1.441453795	0.010217413	-0.365586148	0.300773842	0.322224522	-0.776421761	-2.345104662	1.33442315	0.085246759	1.032943298	0.126347925	-0.010217413	-0.45451733	0.181496015	1.130769373	-2.249880663	-0.037471962	-0.531447525	0.160759774	0.661717677	0.51582268	-0.272384894	0.417065588	0.174575701	-2.104600628	-2.045954276	1.422465003	0.394875486	-0.358313528	-1.946202375	-0.057930049	-1.902810954	0.539308633	0.571095686	1.993601218	0.315058297	-1.862731867	-0.064754379
GRMZM2G320941	-2.998020796	1.422465003	-0.140092436	0.579132162	-0.195363108	1.286210621	1.33442315	-2.645701413	-2.468001988	-0.704730028	-2.345104662	1.993601218	-0.272384894	0.776421761	-2.249880663	0.258273739	-0.409646587	-2.171527717	1.862731867	0.017029548	1.460977052	-2.104600628	0.51582268	0.933535639	1.351202935	-0.230202032	-0.446977502	-0.842592259	0.731172307	0.531447525	1.068431117	1.143773961	-0.153863466	-0.202310601	-0.462083086	0.251237576	-0.237202109	0.767246816	0.998710851	0.523619123	-0.387522319	-0.882109877	-0.823319923	-0.722302208	1.403975696	1.117953259	-0.358313528	0.293654744	0.687372812
GRMZM2G111632	1.790524917	0.329407333	0.365586148	0.842592259	0.852346618	-0.619896262	-1.441453795	-0.223213218	-2.171527717	1.184000049	1.240815502	1.993601218	0.057930049	-1.351202935	1.568142731	0.976525035	-1.092857156	-1.385954264	2.249880663	-0.251237576	-1.545263217	-0.902393588	1.368372038	0.023842473	-1.726602201	-1.757666049	-0.237202109	-0.484942137	0.722302208	-0.258273739	-0.023842473	-0.555132042	0.767246816	-0.678771572	0.409646587	0.244213829	0.678771572	-0.998710851	0.216235289	1.170380633	-0.09208509	0.35105981	-0.587206217	-1.33442315	0.098927729	0.563095926	0.687372812	-0.713488578	-0.126347925
GRMZM2G155096	0.209267873	0.523619123	-0.160759774	1.403975696	-1.211918765	0.611662814	-0.098927729	-1.044626445	-2.998020796	-1.33442315	0.023842473	1.368372038	0.587206217	0.477294855	-0.265322712	0.628171949	-0.571095686	-1.48107362	0.603470624	1.197842699	-1.156974916	0.010217413	-1.368372038	1.286210621	0.223213218	0.064754379	0.126347925	0.044289159	-0.293654744	0.987557182	0.813797671	1.726602201	0.571095686	-1.523165155	0.105775004	0.469675385	-0.492617885	-0.105775004	0.579132162	2.249880663	-0.696025208	0.372878156	-1.385954264	-1.946202375	-2.104600628	0.83291742	0.842592259	-0.74010031	1.757666049
GRMZM2G005454	0.563095926	-2.998020796	0.611662814	-2.645701413	0.387522319	0.731172307	-2.468001988	-2.345104662	1.902810954	0.767246816	0.804348643	-2.104600628	0.508057465	0.071581727	0.336607179	0.417065588	1.318010897	0.794970891	1.422465003	0.713488578	-1.993601218	-1.946202375	0.286550499	0.085246759	-1.902810954	-1.862731867	0.862182757	-1.825439172	0.670220259	-1.790524917	-1.757666049	0.424507616	-1.697120332	1.056453949	0.315058297	-1.642224543	-1.616536998	-0.174575701	1.568142731	0.696025208	-1.568142731	-1.545263217	-1.523165155	-1.501786817	0.539308633	-1.48107362	-1.460977052	-0.119484771	-1.441453795
GRMZM2G000718	1.441453795	-0.202310601	1.092857156	-0.336607179	-0.272384894	-0.51582268	0.477294855	0.678771572	-1.117953259	-1.403975696	-0.126347925	-0.098927729	0.279460686	0.126347925	-1.902810954	-0.500322766	0.484942137	-0.823319923	0.469675385	0.153863466	-1.226239142	-0.417065588	-1.301946185	-0.628171949	1.993601218	-1.156974916	0.767246816	-0.713488578	0.387522319	-0.237202109	-0.037471962	-0.223213218	0.636490883	-1.184000049	-0.343824517	0.195363108	0.785662535	-0.704730028	0.023842473	-0.315058297	0.202310601	-1.056453949	0.51582268	0.230202032	0.587206217	-0.188425032	0.105775004	0.571095686	-0.678771572
GRMZM2G039841	0.133217035	0.713488578	1.032943298	-0.555132042	0.603470624	-0.45451733	0.83291742	-0.987557182	1.211918765	0.279460686	1.385954264	0.852346618	0.329407333	-0.813797671	-0.539308633	0.6448541	-0.83291742	2.249880663	0.174575701	1.270787244	0.409646587	-1.226239142	-0.372878156	-0.74010031	2.645701413	-0.678771572	0.336607179	1.318010897	0.230202032	1.523165155	0.446977502	0.539308633	1.368372038	0.160759774	-0.523619123	-1.092857156	-0.153863466	2.045954276	-0.902393588	0.35105981	-1.080563549	1.501786817	0.547203211	-0.965610478	-0.181496015	0.571095686	-0.804348643	-0.547203211	0.636490883
GRMZM5G880268	1.009990169	-0.417065588	1.068431117	0.372878156	-0.244213829	0.872103029	-0.91267586	-0.882109877	2.345104662	-0.872103029	0.587206217	0.965610478	2.171527717	-2.045954276	-0.43197323	-0.7490877	1.591873889	-0.085246759	-0.017029548	-0.372878156	-0.105775004	0.555132042	0.696025208	0.508057465	0.258273739	-0.619896262	1.441453795	0.813797671	1.143773961	-1.021399468	-1.068431117	0.7490877	0.462083086	0.446977502	0.322224522	0.902393588	-0.965610478	-0.687372812	-1.790524917	0.595318735	-1.642224543	-1.130769373	-0.477294855	-0.119484771	0.998710851	-1.902810954	-0.696025208	-0.272384894	-1.056453949
GRMZM2G080650	0.209267873	1.184000049	1.368372038	0.469675385	-1.385954264	0.037471962	1.044626445	-1.441453795	-1.009990169	1.032943298	-1.156974916	0.944119285	0.563095926	0.251237576	-2.998020796	-0.044289159	1.270787244	-0.902393588	-0.265322712	0.678771572	-2.645701413	2.104600628	-0.051108415	0.140092436	-0.358313528	-0.842592259	0.653262666	0.998710851	0.258273739	0.595318735	0.45451733	1.591873889	1.757666049	-1.184000049	-0.74010031	-0.424507616	0.51582268	0.704730028	0.976525035	-0.030656506	-0.892205847	-0.112627241	-0.477294855	-0.133217035	0.380190046	2.045954276	0.587206217	0.804348643	-0.174575701
GRMZM2G068808	-0.387522319	-1.255660378	0.696025208	-0.704730028	0.531447525	-0.272384894	-1.197842699	-0.563095926	1.080563549	-0.424507616	1.184000049	-0.174575701	-0.037471962	-2.468001988	0.611662814	0.469675385	0.119484771	0.300773842	0.064754379	-1.021399468	-0.202310601	0.202310601	-0.343824517	-0.539308633	-0.998710851	0.322224522	-0.064754379	-0.794970891	-0.804348643	-0.209267873	-0.785662535	-1.501786817	-0.417065588	-0.587206217	0.126347925	1.301946185	-1.726602201	-0.181496015	1.351202935	-0.244213829	-0.071581727	2.345104662	1.318010897	0.923055543	2.045954276	2.468001988	0.293654744	1.143773961	-0.944119285
GRMZM2G413006	0.587206217	-0.987557182	-0.409646587	0.140092436	0.037471962	-1.156974916	0.098927729	-2.645701413	2.998020796	0.424507616	-0.023842473	0.965610478	-0.329407333	0.071581727	0.500322766	1.993601218	0.358313528	-1.197842699	1.270787244	0.74010031	-1.422465003	-1.368372038	-0.237202109	-0.555132042	0.595318735	-0.315058297	0.023842473	1.825439172	-0.044289159	-0.794970891	-1.697120332	-0.563095926	1.044626445	-0.628171949	0.852346618	-0.636490883	0.307908216	0.244213829	-0.439462999	0.223213218	-0.45451733	-0.611662814	1.523165155	0.7490877	0.188425032	0.722302208	-0.064754379	0.181496015	0.293654744
GRMZM2G390345	0.571095686	-0.785662535	0.258273739	-1.170380633	0.126347925	2.045954276	0.105775004	-0.358313528	-2.045954276	-0.579132162	-0.923055543	1.642224543	-0.153863466	-0.329407333	-1.286210621	-0.892205847	0.902393588	1.501786817	-0.954809756	1.825439172	0.133217035	0.579132162	-0.74010031	0.387522319	0.358313528	0.064754379	0.279460686	-1.642224543	0.767246816	-1.255660378	0.587206217	0.523619123	-0.195363108	-1.545263217	0.167663737	1.946202375	0.265322712	-1.697120332	-0.804348643	1.170380633	-0.704730028	-1.318010897	-0.51582268	-0.126347925	1.385954264	0.813797671	-1.460977052	-1.211918765	-1.403975696
GRMZM2G033570	1.568142731	0.619896262	0.595318735	-0.195363108	0.126347925	1.318010897	-1.143773961	0.293654744	0.661717677	0.882109877	-0.140092436	2.998020796	1.545263217	-1.591873889	0.160759774	0.265322712	-0.300773842	0.167663737	0.35105981	-0.023842473	0.852346618	0.119484771	0.842592259	0.555132042	0.785662535	0.195363108	-0.112627241	0.587206217	1.009990169	-0.713488578	-0.704730028	-0.477294855	-0.380190046	-1.351202935	1.184000049	0.722302208	-0.7490877	0.343824517	0.133217035	0.954809756	-0.933535639	0.987557182	-2.645701413	-2.468001988	-0.037471962	0.244213829	-0.842592259	-1.902810954	0.380190046
GRMZM2G040933	-0.45451733	-0.409646587	0.611662814	-0.153863466	-0.965610478	1.226239142	0.998710851	-1.48107362	-1.044626445	-0.862182757	-0.776421761	0.051108415	0.976525035	0.555132042	-0.380190046	-1.032943298	0.804348643	0.794970891	-0.508057465	0.098927729	-1.33442315	0.071581727	0.057930049	-0.587206217	0.167663737	-0.794970891	0.944119285	0.003405752	0.83291742	0.112627241	1.270787244	0.202310601	0.477294855	-2.468001988	1.403975696	1.669043821	0.539308633	-0.167663737	-0.051108415	0.492617885	-0.579132162	0.322224522	-0.293654744	-0.500322766	1.790524917	0.579132162	-0.394875486	-0.064754379	-0.329407333
AC214648.3_FG001	-0.83291742	1.156974916	1.197842699	-2.998020796	0.713488578	0.547203211	0.424507616	-2.645701413	1.080563549	-0.417065588	1.021399468	0.571095686	-0.051108415	0.394875486	-0.439462999	0.678771572	0.35105981	0.174575701	1.441453795	1.056453949	1.568142731	1.044626445	0.965610478	0.244213829	1.403975696	0.722302208	-0.017029548	0.023842473	1.460977052	0.057930049	1.211918765	0.146974467	0.188425032	1.902810954	-2.171527717	-0.365586148	-0.446977502	1.130769373	-0.223213218	-0.611662814	0.037471962	-0.322224522	-2.104600628	-0.704730028	-2.045954276	-0.251237576	1.993601218	-0.508057465	0.140092436
GRMZM2G354610	1.130769373	1.351202935	0.636490883	-0.45451733	-0.661717677	0.251237576	0.085246759	0.678771572	2.468001988	0.446977502	1.080563549	1.902810954	2.104600628	-1.946202375	0.704730028	0.017029548	-0.030656506	1.068431117	1.240815502	-0.140092436	0.230202032	0.965610478	0.500322766	-0.492617885	-0.813797671	-0.758136008	-1.286210621	-0.477294855	0.83291742	2.249880663	0.892205847	0.852346618	-0.126347925	-1.130769373	-1.117953259	-0.462083086	-0.023842473	1.318010897	0.140092436	-0.322224522	-1.301946185	1.105318189	0.244213829	-1.226239142	-0.146974467	0.322224522	-2.998020796	-0.439462999	-0.776421761
GRMZM2G323750	1.226239142	0.265322712	-2.998020796	0.678771572	1.021399468	-2.645701413	-0.35105981	-2.468001988	-0.307908216	-2.345104662	-0.153863466	0.579132162	0.017029548	1.616536998	0.140092436	0.531447525	0.785662535	0.83291742	0.188425032	0.181496015	0.365586148	0.731172307	-0.230202032	0.923055543	0.704730028	-2.249880663	-0.424507616	-2.104600628	-2.045954276	-0.071581727	-1.993601218	0.358313528	-1.946202375	-1.862731867	-1.825439172	-0.358313528	-0.112627241	-1.790524917	0.293654744	0.202310601	1.270787244	-1.757666049	-1.726602201	-0.140092436	0.030656506	-1.697120332	1.568142731	-1.669043821	-1.642224543
GRMZM2G123371	2.045954276	-0.09208509	-0.484942137	1.056453949	1.403975696	0.387522319	-0.35105981	-0.167663737	-2.645701413	-0.547203211	0.813797671	-0.531447525	1.368372038	0.286550499	-0.272384894	0.023842473	0.611662814	0.678771572	-0.713488578	0.469675385	-1.642224543	-0.469675385	-1.056453949	-2.998020796	1.501786817	0.003405752	-0.322224522	-1.080563549	0.6448541	0.704730028	0.563095926	-0.402250065	0.571095686	-1.143773961	1.48107362	0.653262666	-0.804348643	1.286210621	0.126347925	0.394875486	-0.678771572	0.862182757	-0.439462999	-0.862182757	0.477294855	0.661717677	0.244213829	0.160759774	-0.119484771
GRMZM2G035688	1.790524917	0.595318735	-0.140092436	-0.272384894	1.240815502	1.545263217	-0.126347925	1.825439172	1.591873889	-0.611662814	-0.023842473	-0.619896262	1.009990169	-0.492617885	1.197842699	-0.105775004	1.270787244	0.91267586	0.998710851	0.74010031	-2.645701413	-0.160759774	0.09208509	0.731172307	-2.468001988	-0.258273739	0.722302208	0.713488578	0.976525035	0.539308633	-2.345104662	-0.322224522	-0.508057465	0.670220259	0.010217413	-2.249880663	0.603470624	0.307908216	-2.171527717	1.226239142	-2.104600628	-2.045954276	-1.993601218	-1.946202375	-0.365586148	0.140092436	0.216235289	-0.45451733	-0.064754379
GRMZM2G010306	1.523165155	-0.402250065	1.056453949	0.195363108	0.394875486	1.790524917	0.010217413	-0.446977502	-1.368372038	0.09208509	-0.146974467	-0.731172307	-0.365586148	0.923055543	-0.653262666	0.078412413	2.998020796	-0.531447525	0.188425032	-0.003405752	-0.044289159	0.579132162	-1.441453795	0.611662814	0.023842473	-0.085246759	0.244213829	-1.056453949	0.508057465	-0.842592259	0.758136008	1.902810954	1.48107362	-0.322224522	1.044626445	0.804348643	-0.51582268	-0.477294855	-1.351202935	1.080563549	-0.603470624	-0.722302208	-2.645701413	-0.987557182	0.402250065	-0.555132042	-1.902810954	-0.064754379	-2.171527717
AC205250.3_FG006	0.322224522	1.568142731	1.021399468	0.862182757	-0.105775004	1.422465003	1.757666049	0.776421761	2.171527717	-2.998020796	0.030656506	0.078412413	0.424507616	1.044626445	-2.645701413	-2.468001988	0.954809756	0.272384894	-2.345104662	0.484942137	0.133217035	-0.146974467	0.329407333	-0.064754379	0.251237576	1.092857156	0.098927729	-2.171527717	0.209267873	-2.104600628	-2.045954276	-0.195363108	0.35105981	-1.902810954	-0.202310601	-1.862731867	0.126347925	-0.133217035	-1.790524917	1.143773961	-1.757666049	-1.726602201	1.825439172	0.037471962	1.184000049	-1.697120332	-1.669043821	-1.642224543	-0.037471962
GRMZM2G090063	0.195363108	-0.603470624	1.021399468	0.91267586	0.696025208	-0.51582268	-0.209267873	-0.776421761	0.293654744	0.539308633	-0.071581727	-0.628171949	0.133217035	-0.057930049	-0.037471962	-0.563095926	-0.547203211	-2.998020796	2.998020796	-0.202310601	-0.823319923	1.240815502	-2.645701413	-0.976525035	-2.468001988	-1.403975696	0.098927729	-0.469675385	0.500322766	0.767246816	0.571095686	0.923055543	1.080563549	2.045954276	-0.329407333	-0.713488578	0.119484771	-0.244213829	0.687372812	0.484942137	-0.064754379	0.882109877	2.171527717	1.226239142	-0.003405752	0.439462999	-0.731172307	-0.619896262	1.056453949
GRMZM2G127160	-0.112627241	-0.595318735	1.757666049	0.09208509	-1.642224543	0.085246759	0.160759774	-1.757666049	-1.032943298	0.230202032	-0.336607179	1.056453949	0.372878156	0.611662814	1.197842699	-0.852346618	0.343824517	0.954809756	0.140092436	-0.064754379	0.500322766	-1.044626445	0.492617885	-1.092857156	1.441453795	-0.713488578	0.704730028	0.531447525	1.080563549	1.825439172	1.270787244	1.790524917	1.301946185	1.642224543	-0.813797671	-0.202310601	0.670220259	1.368372038	-0.424507616	1.545263217	-0.722302208	1.403975696	-0.315058297	-0.037471962	-0.687372812	2.104600628	-0.251237576	0.286550499	-0.976525035
GRMZM2G029184	0.216235289	-0.628171949	-0.057930049	1.117953259	0.842592259	0.307908216	0.462083086	-1.403975696	2.998020796	-0.555132042	-0.872103029	0.044289159	-0.140092436	0.230202032	0.531447525	-0.539308633	0.500322766	0.300773842	-0.462083086	0.804348643	-1.422465003	-0.307908216	0.017029548	0.112627241	2.171527717	-1.33442315	-0.322224522	0.661717677	1.385954264	1.902810954	1.993601218	-0.003405752	0.202310601	-1.255660378	-0.523619123	0.619896262	0.794970891	-0.547203211	-0.987557182	0.670220259	-1.501786817	-1.862731867	0.892205847	-0.244213829	0.010217413	-0.017029548	0.119484771	-0.402250065	1.403975696
GRMZM5G871463	1.993601218	0.387522319	0.91267586	0.322224522	1.240815502	0.670220259	-0.023842473	-1.270787244	-1.286210621	-0.965610478	-0.272384894	1.286210621	-2.998020796	-0.078412413	-0.439462999	-0.417065588	-0.785662535	-0.358313528	1.33442315	0.954809756	-1.184000049	-0.976525035	-0.402250065	1.669043821	2.104600628	-0.322224522	0.794970891	1.044626445	1.422465003	-0.484942137	0.167663737	0.126347925	-0.636490883	-1.697120332	-0.595318735	1.080563549	-1.009990169	0.286550499	-1.669043821	1.757666049	-1.616536998	-1.170380633	1.862731867	-0.010217413	0.133217035	0.587206217	0.188425032	-0.987557182	0.409646587
[truncated: 248 more columns]
