# Supplementary material for: Verification of Three-Phase Dependency Analysis Bayesian Network Learning Method for Maize Carotenoid Gene Mining
Source: Biomed Res Int. 2017 Jul 30;2017:1813494. doi: 10.1155/2017/1813494 (PMC5554554; doi:10.1155/2017/1813494)
Supplement: Supplementary file 1 — The experiment data 1 of 109 nodes, the experiment data 2 of 109 nodes, and so on are shown here. [file 1813494.f1.zip › Supplementary material/Gene100_7.csv]

V1	V2	V3	V4	V5	V6	V7	V8	V9	V10	V11	V12	V13	V14	V15	V16	V17	V18	V19	V20	V21	V22	V23	V24	V25	V26	V27	V28	V29	V30	V31	V32	V33	V34	V35	V36	V37	V38	V39	V40	V41	V42	V43	V44	V45	V46	V47	V48	V49	V50
GRMZM2G451224	-0.112627241	1.523165155	1.211918765	0.933535639	-1.441453795	0.508057465	1.862731867	0.315058297	-0.417065588	1.568142731	-0.064754379	1.403975696	1.993601218	1.441453795	0.998710851	0.563095926	-0.587206217	0.329407333	0.300773842	0.017029548	2.345104662	-1.591873889	0.188425032	-0.358313528	0.603470624	-0.722302208	-0.776421761	1.946202375	-0.343824517	0.523619123	-0.785662535	-0.852346618	0.146974467	-1.009990169	0.954809756	-0.078412413	-0.767246816	0.976525035	1.460977052	0.439462999	-2.998020796	0.731172307	1.184000049	1.33442315	-1.092857156	0.872103029	-0.133217035	2.171527717	0.823319923
GRMZM2G179421	1.143773961	-0.6448541	-0.882109877	0.998710851	1.501786817	0.531447525	-0.181496015	0.244213829	-2.998020796	0.704730028	-0.439462999	1.301946185	-0.336607179	0.365586148	-0.813797671	0.329407333	2.468001988	1.591873889	-1.726602201	1.351202935	1.032943298	0.872103029	-2.104600628	0.279460686	0.272384894	1.184000049	0.794970891	-1.825439172	0.105775004	-0.628171949	-0.216235289	1.021399468	0.45451733	0.387522319	1.211918765	0.078412413	0.636490883	-1.33442315	-0.112627241	-0.500322766	-0.555132042	-1.270787244	-0.09208509	0.670220259	-0.358313528	-0.272384894	-1.255660378	0.195363108	-0.661717677
GRMZM5G806839	0.209267873	-1.056453949	-0.45451733	-0.286550499	-0.064754379	-2.249880663	1.385954264	-0.477294855	2.998020796	-0.358313528	-0.813797671	-1.184000049	0.216235289	-0.804348643	0.358313528	0.45451733	-0.944119285	-0.722302208	-0.523619123	-0.372878156	-1.197842699	-0.976525035	0.265322712	-1.501786817	-0.563095926	0.153863466	-1.825439172	1.021399468	0.611662814	0.998710851	-0.653262666	-0.343824517	0.098927729	-0.785662535	-1.270787244	-1.591873889	-0.882109877	0.852346618	0.813797671	0.336607179	-0.579132162	0.603470624	-0.051108415	1.009990169	0.653262666	0.823319923	-1.156974916	-1.318010897	1.790524917
GRMZM2G125044	1.117953259	-0.251237576	1.286210621	-0.322224522	0.044289159	1.441453795	-0.424507616	-0.078412413	-2.045954276	0.823319923	-1.48107362	0.7490877	1.318010897	0.279460686	-0.852346618	-0.653262666	1.825439172	-0.064754379	-0.767246816	-0.023842473	0.315058297	1.351202935	-1.403975696	0.017029548	0.329407333	-0.636490883	0.023842473	-1.422465003	0.133217035	-1.33442315	0.83291742	0.813797671	-0.293654744	-1.368372038	0.098927729	1.669043821	0.380190046	-0.713488578	-0.45451733	1.044626445	-1.056453949	-0.555132042	-1.545263217	-0.91267586	1.460977052	0.469675385	-1.197842699	-1.240815502	-0.265322712
GRMZM2G154958	1.105318189	0.852346618	-1.143773961	-0.872103029	0.037471962	-0.508057465	-0.6448541	0.628171949	2.171527717	0.6448541	2.468001988	1.993601218	1.568142731	-1.226239142	0.017029548	-0.057930049	0.140092436	0.555132042	1.270787244	0.446977502	2.104600628	-0.300773842	1.226239142	-0.902393588	-0.195363108	0.579132162	-1.403975696	0.402250065	-0.687372812	1.156974916	-0.140092436	-0.112627241	1.757666049	-0.933535639	-0.696025208	0.51582268	-0.315058297	0.813797671	-0.678771572	0.167663737	-1.862731867	0.380190046	-0.35105981	0.35105981	0.722302208	1.642224543	-2.171527717	-0.484942137	0.539308633
GRMZM2G149474	-2.998020796	0.678771572	-0.051108415	-0.402250065	-2.645701413	-2.468001988	2.998020796	-2.345104662	-0.43197323	-2.249880663	-2.171527717	-0.105775004	0.539308633	-2.045954276	-1.993601218	-0.195363108	-0.492617885	1.368372038	-1.946202375	-0.409646587	-1.862731867	-1.825439172	-0.244213829	-1.790524917	0.439462999	-1.757666049	0.380190046	1.301946185	0.237202109	-0.439462999	-1.726602201	-0.071581727	0.531447525	-1.642224543	-0.322224522	-1.616536998	-1.591873889	-1.568142731	0.813797671	0.83291742	-1.545263217	0.010217413	0.174575701	1.240815502	2.645701413	0.987557182	0.329407333	0.230202032	1.105318189
GRMZM2G082207	0.6448541	1.080563549	-1.255660378	0.209267873	0.713488578	-0.09208509	-0.237202109	-0.862182757	-2.345104662	0.293654744	1.523165155	1.790524917	1.568142731	-1.044626445	-0.902393588	-0.892205847	0.595318735	0.300773842	-1.270787244	1.009990169	-0.804348643	-0.209267873	-2.249880663	-0.611662814	-0.064754379	-0.687372812	1.642224543	1.117953259	0.670220259	1.143773961	1.501786817	0.424507616	0.279460686	-1.862731867	0.133217035	0.628171949	-0.017029548	-0.731172307	0.237202109	0.813797671	-1.33442315	-0.174575701	0.064754379	-0.603470624	0.500322766	0.872103029	-0.74010031	0.653262666	-0.010217413
GRMZM2G162670	-1.021399468	0.563095926	-0.030656506	0.462083086	-0.687372812	0.555132042	0.547203211	-0.83291742	-2.345104662	0.531447525	-1.545263217	0.315058297	0.965610478	0.402250065	-2.645701413	-1.009990169	0.037471962	-0.696025208	1.862731867	0.202310601	-1.422465003	-1.697120332	-0.044289159	-0.882109877	1.032943298	-2.171527717	-0.500322766	1.105318189	0.146974467	0.571095686	2.104600628	-0.126347925	0.258273739	0.523619123	-0.037471962	-0.078412413	-0.813797671	0.842592259	0.862182757	0.078412413	-1.993601218	-0.272384894	0.611662814	-0.051108415	0.051108415	1.270787244	0.085246759	0.661717677	-0.119484771
GRMZM2G061101	-0.531447525	-0.722302208	1.226239142	-0.439462999	-0.167663737	-0.661717677	-0.286550499	1.092857156	0.244213829	0.619896262	0.731172307	1.33442315	1.422465003	-0.237202109	0.636490883	-1.226239142	0.293654744	-0.976525035	0.003405752	-0.696025208	-1.197842699	-0.146974467	0.469675385	0.071581727	-1.184000049	-1.616536998	0.424507616	-0.83291742	-0.794970891	0.119484771	-0.523619123	-1.790524917	-0.587206217	-0.965610478	-0.003405752	-0.704730028	-0.687372812	-0.153863466	1.545263217	-0.251237576	0.258273739	0.531447525	0.336607179	-1.825439172	-0.417065588	0.409646587	-2.171527717	-0.944119285	-0.160759774
GRMZM2G097593	2.045954276	0.209267873	0.230202032	0.365586148	0.251237576	-1.318010897	-0.146974467	-0.343824517	0.140092436	1.117953259	0.237202109	1.105318189	0.43197323	0.409646587	0.7490877	-0.09208509	-0.954809756	-0.469675385	0.670220259	-0.160759774	-0.794970891	-1.33442315	0.595318735	0.477294855	1.318010897	-0.619896262	-1.441453795	1.143773961	-0.45451733	0.882109877	-1.460977052	-0.244213829	-0.409646587	-0.477294855	-0.6448541	-1.143773961	-0.998710851	1.351202935	0.286550499	0.804348643	-1.270787244	-1.130769373	2.104600628	1.009990169	-0.852346618	0.785662535	0.037471962	-0.35105981	0.91267586
GRMZM2G044724	-0.933535639	0.954809756	1.270787244	-1.130769373	-0.852346618	0.579132162	0.670220259	0.587206217	1.170380633	-0.037471962	-0.670220259	1.642224543	2.645701413	-0.776421761	-1.642224543	-0.6448541	-0.965610478	-0.017029548	0.882109877	-2.045954276	-0.051108415	-0.251237576	1.092857156	-0.704730028	-1.044626445	-0.653262666	-2.171527717	0.595318735	0.776421761	0.933535639	0.704730028	0.329407333	0.272384894	-2.998020796	-0.767246816	-0.862182757	-0.508057465	1.032943298	1.117953259	1.105318189	-1.568142731	1.726602201	0.051108415	-0.133217035	0.661717677	0.696025208	-0.83291742	-0.531447525	0.35105981
GRMZM2G007195	0.500322766	1.170380633	0.872103029	-1.318010897	0.492617885	-0.43197323	1.403975696	-1.021399468	0.944119285	-0.358313528	0.439462999	0.153863466	2.998020796	-0.244213829	-0.944119285	-0.776421761	0.74010031	1.441453795	-0.492617885	-0.402250065	-0.696025208	0.030656506	0.293654744	-0.300773842	0.696025208	-0.547203211	0.315058297	1.301946185	0.776421761	1.591873889	-0.09208509	-1.385954264	1.255660378	-2.998020796	0.862182757	-0.030656506	0.051108415	0.713488578	1.48107362	1.351202935	-0.882109877	1.726602201	0.251237576	-1.568142731	0.394875486	0.731172307	0.523619123	0.358313528	0.387522319
GRMZM2G327059	-1.523165155	-0.852346618	-0.933535639	0.112627241	-0.078412413	0.188425032	0.563095926	-0.492617885	2.045954276	-1.568142731	1.009990169	0.731172307	1.946202375	-0.286550499	1.080563549	0.181496015	0.6448541	0.365586148	1.460977052	-1.044626445	-0.484942137	-0.477294855	-0.133217035	0.133217035	-0.209267873	-0.105775004	-1.862731867	0.195363108	-0.687372812	-1.170380633	-2.345104662	-1.726602201	-0.767246816	-2.104600628	-2.645701413	-0.872103029	-2.045954276	2.171527717	-0.098927729	0.976525035	-0.462083086	0.944119285	1.825439172	1.351202935	1.757666049	1.642224543	-1.056453949	-0.74010031	0.037471962
GRMZM2G402837	-0.804348643	0.758136008	0.085246759	0.571095686	0.547203211	2.468001988	-0.424507616	0.286550499	-0.74010031	-0.944119285	0.687372812	0.944119285	1.143773961	0.003405752	0.579132162	0.244213829	1.825439172	0.882109877	0.160759774	1.130769373	-0.307908216	0.365586148	-2.998020796	0.387522319	2.104600628	-0.571095686	0.872103029	-0.731172307	-0.704730028	0.051108415	-1.211918765	-0.372878156	-0.687372812	1.240815502	-2.645701413	-0.484942137	-1.197842699	0.704730028	1.441453795	0.216235289	0.307908216	-0.010217413	1.33442315	0.237202109	0.794970891	0.987557182	-0.758136008	-0.767246816	1.422465003
GRMZM2G455128	0.628171949	1.902810954	-0.469675385	0.017029548	-0.085246759	1.156974916	1.130769373	0.731172307	2.249880663	1.385954264	0.153863466	0.823319923	2.998020796	-1.642224543	0.462083086	-0.477294855	1.068431117	0.563095926	-1.032943298	-1.403975696	0.174575701	-0.358313528	-0.126347925	-0.071581727	-0.579132162	-1.616536998	-1.156974916	-0.315058297	0.892205847	0.258273739	-2.645701413	-0.687372812	0.587206217	-2.345104662	0.842592259	-0.265322712	-1.255660378	1.460977052	0.372878156	1.009990169	-1.301946185	0.933535639	-1.902810954	-0.424507616	0.976525035	0.446977502	-1.226239142	-0.380190046	0.424507616
GRMZM2G043600	-0.293654744	-0.619896262	1.080563549	-0.140092436	-0.794970891	-0.51582268	0.372878156	-0.35105981	-2.045954276	0.017029548	-0.409646587	0.216235289	-0.653262666	-1.270787244	-0.661717677	-0.078412413	-1.385954264	-1.301946185	-1.143773961	0.078412413	1.130769373	0.696025208	1.105318189	0.35105981	1.021399468	0.987557182	0.286550499	0.057930049	-0.181496015	0.892205847	-0.446977502	0.653262666	-0.965610478	-1.318010897	-0.146974467	-0.603470624	0.722302208	-0.547203211	-0.944119285	0.272384894	0.336607179	-0.842592259	-0.336607179	-1.080563549	0.563095926	1.568142731	-0.112627241	-0.670220259	0.571095686
GRMZM2G456473	0.823319923	-0.439462999	-1.226239142	-0.258273739	1.946202375	0.74010031	-0.209267873	-0.539308633	-1.616536998	-1.240815502	0.91267586	-0.195363108	-0.987557182	-1.197842699	-0.976525035	-0.071581727	0.071581727	-2.998020796	0.469675385	0.286550499	-0.409646587	2.998020796	0.329407333	-0.636490883	-0.477294855	-0.776421761	-0.372878156	-1.902810954	-1.092857156	-0.722302208	-1.790524917	-0.336607179	-0.237202109	-2.249880663	0.603470624	-0.112627241	0.098927729	-0.579132162	0.258273739	0.300773842	-0.181496015	1.270787244	-1.068431117	-0.91267586	0.064754379	1.33442315	-0.174575701	0.595318735	1.385954264
GRMZM2G067205	0.365586148	-0.35105981	0.439462999	-0.500322766	1.143773961	0.563095926	0.051108415	-0.842592259	0.987557182	-0.944119285	0.539308633	0.329407333	-1.368372038	-0.017029548	-0.230202032	-0.209267873	1.080563549	-0.987557182	2.249880663	-0.579132162	-0.539308633	-0.91267586	-0.216235289	0.892205847	0.174575701	-0.862182757	-0.258273739	0.230202032	2.345104662	-1.270787244	1.240815502	1.591873889	-0.160759774	-0.872103029	1.021399468	-0.223213218	-1.946202375	-0.387522319	-2.345104662	1.301946185	-0.402250065	-0.687372812	0.119484771	0.51582268	0.286550499	0.167663737	-0.272384894	-0.424507616	-1.422465003
GRMZM2G104012	-0.579132162	1.591873889	0.571095686	-0.279460686	-0.244213829	-1.184000049	1.993601218	-1.368372038	-2.998020796	-0.862182757	-1.616536998	1.143773961	2.468001988	-0.713488578	-1.669043821	-1.032943298	-0.258273739	-0.037471962	0.343824517	0.258273739	0.477294855	-1.757666049	-0.587206217	-0.539308633	1.021399468	-1.501786817	-1.385954264	2.345104662	-0.439462999	1.117953259	1.032943298	-0.776421761	1.368372038	-1.48107362	-0.003405752	1.211918765	-0.237202109	1.825439172	1.422465003	0.265322712	-1.902810954	1.301946185	1.056453949	0.785662535	0.023842473	1.697120332	1.105318189	2.104600628	1.184000049
GRMZM2G375956	1.143773961	0.119484771	0.057930049	-0.112627241	-0.286550499	0.216235289	0.195363108	1.240815502	-1.825439172	1.697120332	0.329407333	1.226239142	1.48107362	0.071581727	-1.080563549	0.531447525	2.045954276	0.153863466	1.056453949	-0.965610478	-1.642224543	-1.946202375	-0.531447525	-0.794970891	0.628171949	-1.197842699	-0.713488578	-1.032943298	-0.417065588	-0.085246759	-1.226239142	-0.45451733	0.017029548	0.508057465	-0.424507616	-0.251237576	-0.7490877	-0.731172307	1.068431117	1.170380633	-1.545263217	-0.279460686	0.188425032	1.616536998	0.307908216	2.171527717	0.133217035	0.902393588	0.237202109
GRMZM2G158045	-0.195363108	1.092857156	0.251237576	-0.064754379	-0.6448541	-0.315058297	1.255660378	-0.402250065	1.902810954	-0.365586148	-0.484942137	2.045954276	2.645701413	-0.51582268	-0.500322766	-0.439462999	-0.209267873	0.237202109	0.126347925	0.133217035	-0.343824517	-1.460977052	-0.43197323	-0.017029548	0.010217413	-0.329407333	-0.758136008	1.825439172	-0.010217413	2.345104662	-0.279460686	0.174575701	0.713488578	-1.616536998	-0.336607179	-1.501786817	-1.270787244	1.318010897	0.91267586	1.385954264	-0.678771572	1.301946185	1.286210621	0.181496015	0.146974467	0.933535639	-0.713488578	-0.188425032	-0.167663737
GRMZM2G309327	1.056453949	1.255660378	-0.216235289	0.882109877	0.126347925	-1.092857156	1.726602201	-1.790524917	2.645701413	-0.531447525	0.174575701	1.441453795	2.998020796	-0.286550499	0.563095926	1.591873889	-0.611662814	-0.523619123	1.351202935	-0.424507616	-0.653262666	-0.112627241	-0.813797671	-0.119484771	-0.965610478	0.343824517	-0.579132162	0.547203211	0.998710851	0.394875486	-0.862182757	-0.057930049	-0.051108415	-2.998020796	1.385954264	-0.188425032	-0.987557182	-0.722302208	1.946202375	0.531447525	-1.757666049	-1.616536998	-0.153863466	-1.351202935	1.021399468	0.051108415	-1.385954264	0.195363108	-0.785662535
GRMZM2G500076	2.345104662	-0.064754379	0.758136008	0.037471962	1.946202375	-0.45451733	-0.358313528	0.044289159	-2.998020796	1.757666049	-1.080563549	0.555132042	-0.329407333	0.35105981	-2.645701413	0.160759774	0.030656506	0.078412413	1.226239142	0.628171949	0.343824517	-1.351202935	-1.545263217	0.51582268	0.776421761	1.460977052	-0.160759774	0.258273739	-1.105318189	0.394875486	0.767246816	0.587206217	0.098927729	2.645701413	-0.872103029	-0.6448541	1.523165155	-2.468001988	-2.345104662	0.785662535	-2.249880663	-2.171527717	-2.104600628	-0.862182757	-1.422465003	-0.017029548	0.272384894	-0.628171949	-0.74010031
GRMZM2G313009	-0.146974467	0.91267586	1.351202935	0.785662535	0.500322766	-0.83291742	-0.696025208	-0.902393588	-1.460977052	0.696025208	0.892205847	1.902810954	-0.579132162	0.365586148	0.555132042	0.902393588	0.571095686	0.071581727	1.825439172	-0.126347925	0.153863466	-0.678771572	0.43197323	-0.813797671	1.301946185	0.195363108	0.051108415	1.422465003	0.409646587	0.35105981	0.188425032	-0.098927729	0.279460686	0.017029548	0.202310601	-1.616536998	0.713488578	-0.010217413	-0.244213829	0.619896262	-2.468001988	-0.387522319	0.731172307	-0.785662535	0.044289159	-0.030656506	-0.105775004	-0.7490877	-0.258273739
GRMZM2G113158	0.105775004	0.987557182	0.555132042	0.085246759	-1.301946185	-0.315058297	0.776421761	-1.056453949	0.872103029	1.441453795	1.318010897	2.249880663	2.998020796	-0.010217413	1.156974916	1.092857156	-0.872103029	-0.595318735	0.279460686	-0.160759774	-0.030656506	0.91267586	0.188425032	1.368372038	-0.785662535	0.587206217	-1.092857156	-0.112627241	0.195363108	0.003405752	-2.171527717	-1.757666049	0.030656506	-1.226239142	0.902393588	-0.670220259	1.143773961	2.104600628	0.023842473	0.678771572	-0.329407333	-0.202310601	-0.153863466	-1.33442315	0.882109877	-0.140092436	-2.345104662	-0.767246816	-0.085246759
GRMZM2G426067	-0.223213218	-0.265322712	0.687372812	-0.628171949	-0.286550499	0.336607179	0.251237576	0.315058297	2.645701413	1.591873889	-1.044626445	-0.508057465	1.318010897	-0.722302208	0.794970891	-0.424507616	0.293654744	1.862731867	0.776421761	0.45451733	-0.293654744	-2.998020796	0.882109877	-1.130769373	-0.300773842	-0.071581727	1.240815502	1.156974916	-1.351202935	0.153863466	-2.645701413	-0.216235289	0.071581727	-1.501786817	0.785662535	0.322224522	-0.484942137	-0.133217035	-0.188425032	-0.272384894	-1.385954264	1.790524917	0.696025208	-1.021399468	0.112627241	0.358313528	-0.051108415	0.078412413	-0.492617885
GRMZM2G105571	1.044626445	0.523619123	1.032943298	-0.010217413	0.91267586	-0.794970891	-1.226239142	0.023842473	-1.130769373	0.628171949	0.105775004	-0.595318735	1.757666049	-0.902393588	-0.140092436	-0.563095926	-0.767246816	-1.48107362	1.130769373	0.611662814	-0.83291742	0.315058297	1.993601218	0.484942137	1.460977052	0.188425032	0.372878156	1.946202375	0.944119285	1.642224543	0.872103029	0.343824517	0.852346618	-0.216235289	0.687372812	-0.531447525	-1.790524917	0.563095926	0.146974467	1.068431117	-2.104600628	1.226239142	0.126347925	-0.307908216	0.6448541	0.195363108	0.244213829	0.286550499	-0.078412413
GRMZM2G396562	-0.09208509	-0.300773842	-0.492617885	0.83291742	-1.255660378	0.126347925	-0.279460686	0.823319923	-2.468001988	0.628171949	-1.211918765	0.523619123	-1.068431117	-0.293654744	-1.441453795	0.417065588	-0.244213829	0.167663737	-0.446977502	1.385954264	1.591873889	1.790524917	0.057930049	0.140092436	0.160759774	-0.508057465	2.645701413	-1.48107362	0.603470624	-0.105775004	0.265322712	0.976525035	-0.477294855	-1.591873889	-0.394875486	1.197842699	0.051108415	0.731172307	-0.862182757	-0.223213218	-0.842592259	0.251237576	0.010217413	0.064754379	0.336607179	0.882109877	2.345104662	-0.579132162	0.484942137
GRMZM2G105892	-0.230202032	-1.301946185	0.402250065	-1.422465003	-0.882109877	0.767246816	1.441453795	-0.74010031	0.336607179	-1.105318189	-0.09208509	0.758136008	-2.645701413	0.571095686	-1.862731867	-0.244213829	1.056453949	1.993601218	0.315058297	-0.329407333	1.523165155	0.636490883	0.409646587	-0.7490877	-1.270787244	0.286550499	-0.713488578	1.642224543	1.009990169	0.358313528	0.265322712	-0.944119285	-0.758136008	-1.117953259	-1.33442315	-1.044626445	-0.003405752	0.469675385	-0.037471962	0.119484771	-0.477294855	-1.351202935	-0.670220259	-0.687372812	-0.078412413	-0.539308633	-2.468001988	-0.237202109	1.460977052
GRMZM2G095576	-1.460977052	2.104600628	0.661717677	-2.998020796	-0.023842473	0.563095926	1.993601218	-2.645701413	-0.492617885	1.318010897	-1.184000049	-0.794970891	-0.954809756	0.202310601	1.032943298	0.085246759	0.767246816	0.804348643	-0.804348643	-0.424507616	1.669043821	1.255660378	-0.563095926	1.226239142	-0.862182757	-1.48107362	-0.785662535	1.156974916	-2.345104662	1.184000049	0.216235289	-0.195363108	0.555132042	1.056453949	1.385954264	-2.249880663	-0.704730028	-2.171527717	1.697120332	-0.611662814	-0.037471962	-0.078412413	0.358313528	0.882109877	1.825439172	0.477294855	-0.636490883	-1.270787244	0.372878156
GRMZM2G158083	-1.240815502	1.825439172	0.216235289	-1.255660378	-0.336607179	-0.611662814	0.380190046	-0.595318735	-1.825439172	-0.469675385	-0.202310601	0.7490877	2.998020796	-0.181496015	-1.862731867	-1.211918765	-0.167663737	0.713488578	-1.726602201	-0.704730028	0.45451733	-1.156974916	1.545263217	-0.365586148	1.068431117	-0.140092436	-1.170380633	1.441453795	1.156974916	1.403975696	1.616536998	-1.33442315	-0.003405752	-2.104600628	0.329407333	1.105318189	-0.823319923	0.892205847	2.045954276	0.315058297	-1.642224543	2.468001988	-1.184000049	-0.571095686	0.976525035	0.628171949	0.133217035	0.696025208	0.523619123
GRMZM2G009438	0.944119285	0.500322766	1.568142731	1.862731867	0.954809756	1.170380633	-0.003405752	-0.195363108	-0.424507616	-0.43197323	0.315058297	-0.7490877	0.462083086	-0.044289159	1.385954264	0.372878156	-1.545263217	-0.492617885	-0.105775004	-0.322224522	-0.251237576	-0.696025208	-0.244213829	-0.409646587	1.697120332	0.563095926	-0.446977502	-0.329407333	0.030656506	-0.387522319	-1.130769373	-1.156974916	-0.216235289	0.105775004	0.272384894	0.628171949	1.368372038	0.862182757	-1.568142731	-1.044626445	-1.270787244	0.293654744	-1.403975696	-1.862731867	-0.523619123	-0.010217413	-0.023842473	-0.83291742	0.603470624
GRMZM2G158024	-0.329407333	0.713488578	0.603470624	1.48107362	1.441453795	1.092857156	0.51582268	-0.713488578	-2.345104662	1.318010897	0.696025208	0.477294855	-0.003405752	-0.064754379	0.343824517	-1.591873889	0.852346618	0.933535639	-0.112627241	1.757666049	-0.923055543	0.767246816	-0.508057465	-0.402250065	-0.892205847	0.071581727	0.140092436	-1.255660378	-0.160759774	-0.037471962	0.167663737	0.731172307	0.085246759	-0.272384894	-0.882109877	1.080563549	0.862182757	1.009990169	-2.645701413	1.197842699	0.216235289	-0.862182757	0.300773842	-1.368372038	-0.563095926	0.954809756	0.174575701	-1.170380633	-0.146974467
GRMZM2G171254	0.286550499	-0.017029548	-0.394875486	0.713488578	1.422465003	-0.619896262	-0.307908216	0.469675385	1.080563549	2.998020796	0.372878156	1.318010897	1.368372038	-0.954809756	0.83291742	-0.852346618	-0.653262666	-0.387522319	0.380190046	1.460977052	1.825439172	1.270787244	-0.813797671	-0.722302208	0.477294855	-0.611662814	-0.09208509	0.902393588	0.43197323	0.785662535	0.051108415	0.731172307	0.944119285	0.628171949	1.501786817	1.946202375	1.068431117	1.351202935	0.91267586	0.722302208	-2.171527717	-0.555132042	-1.862731867	-0.687372812	-0.380190046	0.823319923	-0.944119285	0.696025208	0.037471962
GRMZM2G013378	0.272384894	-0.286550499	0.758136008	0.160759774	1.044626445	0.462083086	0.882109877	-1.441453795	-2.998020796	0.636490883	-0.064754379	1.825439172	0.704730028	-0.923055543	0.140092436	-0.098927729	1.403975696	0.402250065	2.249880663	-0.813797671	0.998710851	0.547203211	-1.726602201	-0.057930049	-0.477294855	-0.167663737	-0.195363108	-0.010217413	-0.105775004	-0.571095686	0.336607179	1.48107362	-0.315058297	-1.460977052	1.080563549	-0.09208509	0.010217413	-0.842592259	1.197842699	1.226239142	-0.603470624	0.293654744	-1.946202375	-1.862731867	-0.731172307	-0.265322712	-1.790524917	0.804348643	-1.403975696
GRMZM2G164669	0.057930049	-0.43197323	-0.462083086	1.197842699	-0.098927729	-0.547203211	-0.484942137	0.531447525	-2.998020796	1.545263217	-0.439462999	1.757666049	-1.642224543	-1.270787244	0.064754379	-0.265322712	-0.469675385	-0.571095686	0.409646587	1.009990169	-0.704730028	0.167663737	0.279460686	-0.776421761	-1.545263217	-0.272384894	-0.731172307	-0.329407333	0.112627241	0.731172307	1.068431117	0.678771572	0.174575701	0.687372812	-0.954809756	-2.171527717	1.697120332	0.547203211	-1.790524917	0.402250065	-0.696025208	-0.976525035	-0.758136008	-1.255660378	-0.174575701	1.568142731	-2.104600628	-0.188425032	0.160759774
GRMZM2G089949	0.307908216	0.842592259	-0.230202032	0.484942137	0.140092436	-0.687372812	-0.098927729	-0.704730028	-0.174575701	-0.322224522	0.010217413	1.068431117	-0.758136008	-0.500322766	-0.523619123	-1.33442315	-0.767246816	1.080563549	0.923055543	-0.336607179	0.380190046	0.722302208	-1.156974916	1.669043821	0.661717677	0.731172307	-1.211918765	0.237202109	1.697120332	0.933535639	2.104600628	0.882109877	1.616536998	-0.944119285	-0.555132042	-0.202310601	1.240815502	2.345104662	-0.731172307	-0.409646587	-1.790524917	-0.776421761	1.197842699	1.130769373	0.563095926	-0.492617885	0.611662814	-1.946202375	0.35105981
GRMZM2G472655	0.160759774	1.009990169	0.619896262	1.240815502	-0.078412413	-0.872103029	-0.343824517	-1.068431117	1.117953259	0.722302208	0.611662814	1.825439172	1.501786817	-1.044626445	-0.603470624	0.202310601	-0.484942137	-0.223213218	0.146974467	0.279460686	-0.722302208	-0.409646587	-1.385954264	-0.611662814	2.104600628	0.372878156	-0.571095686	0.539308633	-0.071581727	1.105318189	0.776421761	-0.43197323	0.547203211	-1.143773961	0.307908216	-0.202310601	0.462083086	2.345104662	0.785662535	-0.195363108	-0.329407333	1.946202375	-2.998020796	0.126347925	-0.587206217	1.226239142	-0.439462999	0.272384894	0.794970891
GRMZM2G031904	-0.010217413	1.130769373	-0.776421761	0.804348643	-0.315058297	-1.211918765	0.017029548	-0.195363108	1.318010897	0.619896262	-0.731172307	1.226239142	-0.003405752	-0.037471962	1.790524917	0.51582268	-0.064754379	-0.7490877	0.209267873	0.272384894	0.794970891	1.255660378	-0.862182757	0.563095926	-0.954809756	0.933535639	1.642224543	0.998710851	-0.882109877	0.307908216	-0.119484771	-0.35105981	0.661717677	0.7490877	1.523165155	-0.380190046	0.603470624	-1.226239142	-0.462083086	-1.523165155	-1.757666049	-1.184000049	0.365586148	0.696025208	-0.265322712	-0.153863466	-0.611662814	-0.293654744	0.477294855
GRMZM2G046288	0.882109877	-1.032943298	-0.380190046	0.372878156	2.345104662	0.329407333	1.385954264	0.902393588	-2.345104662	2.645701413	0.776421761	0.722302208	1.156974916	-0.307908216	0.237202109	0.670220259	0.862182757	0.394875486	0.071581727	1.105318189	-1.226239142	-1.197842699	-1.790524917	1.211918765	0.322224522	0.469675385	1.117953259	0.892205847	-1.105318189	0.804348643	1.460977052	1.946202375	-0.167663737	-0.704730028	-0.402250065	1.825439172	0.003405752	-0.258273739	-0.731172307	0.300773842	-1.117953259	-0.758136008	0.258273739	1.130769373	-0.547203211	0.133217035	0.439462999	0.731172307	0.146974467
GRMZM2G155357	-0.017029548	-0.731172307	-0.862182757	0.813797671	-1.021399468	0.064754379	0.023842473	-0.758136008	-2.998020796	0.91267586	-1.726602201	-0.237202109	0.872103029	-0.823319923	-1.790524917	-0.83291742	-1.368372038	0.051108415	-0.140092436	0.722302208	-0.539308633	-1.056453949	-0.976525035	-0.003405752	0.140092436	-0.329407333	0.477294855	1.441453795	0.417065588	2.998020796	2.645701413	0.653262666	0.862182757	-0.500322766	-1.068431117	0.804348643	1.33442315	-0.636490883	0.713488578	0.902393588	0.43197323	-0.195363108	1.056453949	0.636490883	0.365586148	-0.209267873	-0.188425032	0.446977502	0.112627241
GRMZM2G018414	0.279460686	-1.068431117	1.240815502	-0.188425032	-0.51582268	0.6448541	-2.045954276	0.767246816	-1.642224543	0.508057465	-1.032943298	-0.43197323	-0.35105981	-0.965610478	-0.424507616	-1.318010897	0.823319923	-0.336607179	-1.697120332	-0.057930049	-0.365586148	1.422465003	0.167663737	-0.174575701	0.539308633	0.704730028	0.785662535	-0.619896262	1.056453949	-0.902393588	0.402250065	1.616536998	0.484942137	0.09208509	-0.704730028	2.345104662	0.098927729	-1.501786817	-1.092857156	0.223213218	0.492617885	-0.216235289	-0.587206217	-0.804348643	0.477294855	0.446977502	-1.825439172	0.300773842	-0.653262666
GRMZM2G115750	-1.301946185	0.279460686	-1.032943298	-0.409646587	0.776421761	-0.188425032	-0.661717677	0.661717677	-2.468001988	-1.385954264	-1.021399468	0.003405752	0.336607179	-0.523619123	-1.591873889	-0.174575701	-0.394875486	-0.653262666	-0.923055543	0.071581727	-0.892205847	-0.35105981	-1.862731867	0.251237576	-0.167663737	0.394875486	0.731172307	0.133217035	1.032943298	1.642224543	1.862731867	0.563095926	0.6448541	-0.469675385	0.954809756	-0.307908216	0.146974467	-0.216235289	-0.380190046	-0.071581727	-0.976525035	-0.611662814	0.160759774	-0.619896262	0.758136008	1.080563549	-0.336607179	0.195363108	-0.417065588
GRMZM2G098239	-1.021399468	-0.563095926	-0.085246759	-0.678771572	-0.571095686	-1.170380633	-0.933535639	1.318010897	1.523165155	-1.130769373	1.143773961	0.216235289	0.160759774	-1.757666049	1.757666049	-0.336607179	-1.385954264	-1.226239142	0.636490883	-0.286550499	0.976525035	-0.539308633	-1.403975696	0.758136008	-0.469675385	0.112627241	-1.501786817	0.446977502	1.255660378	0.704730028	-1.48107362	-0.619896262	-0.670220259	-0.661717677	-0.595318735	-1.270787244	-0.037471962	-0.237202109	0.195363108	1.068431117	-0.307908216	1.044626445	0.202310601	-0.424507616	0.74010031	-0.160759774	-1.616536998	0.500322766	0.670220259
GRMZM2G432060	-0.882109877	-0.251237576	-0.167663737	-0.244213829	0.462083086	-1.156974916	-0.307908216	-0.842592259	2.998020796	-1.368372038	-1.286210621	0.7490877	-0.587206217	-0.862182757	-0.023842473	0.174575701	-0.923055543	-2.468001988	0.547203211	-1.032943298	-0.785662535	-2.645701413	0.587206217	-1.068431117	-1.130769373	-0.174575701	-0.579132162	1.056453949	-0.030656506	-0.976525035	-1.993601218	0.794970891	0.286550499	-1.255660378	0.469675385	-1.790524917	0.45451733	0.223213218	-0.653262666	0.365586148	-0.300773842	-1.591873889	0.153863466	0.293654744	1.385954264	1.441453795	-1.441453795	-0.119484771	0.35105981
GRMZM2G103342	0.202310601	0.628171949	-0.244213829	-0.603470624	0.852346618	0.003405752	-0.611662814	-0.484942137	1.993601218	1.862731867	1.501786817	1.130769373	1.286210621	-1.068431117	0.174575701	-0.223213218	-0.230202032	-0.181496015	1.044626445	-0.678771572	1.255660378	0.167663737	0.237202109	2.171527717	-0.74010031	-0.322224522	-0.91267586	2.249880663	1.545263217	2.468001988	0.051108415	1.009990169	1.669043821	-0.329407333	-0.209267873	-0.653262666	-0.636490883	1.422465003	-1.211918765	0.785662535	-1.33442315	0.696025208	0.611662814	-0.83291742	-0.010217413	0.954809756	-0.439462999	0.500322766	-1.143773961
GRMZM2G167019	-2.998020796	0.417065588	-2.645701413	0.661717677	0.731172307	0.365586148	-2.468001988	-0.223213218	-2.345104662	0.402250065	-0.343824517	0.153863466	0.539308633	-0.153863466	0.181496015	-0.160759774	-2.171527717	0.439462999	-0.293654744	-0.071581727	-0.272384894	-2.045954276	-1.993601218	1.616536998	-1.946202375	0.713488578	-1.862731867	-1.825439172	1.441453795	-0.358313528	-1.790524917	-1.726602201	-1.697120332	1.568142731	1.286210621	-0.484942137	-1.669043821	-1.616536998	1.197842699	0.343824517	1.009990169	0.098927729	-1.591873889	-0.098927729	0.579132162	1.044626445	0.776421761	-0.417065588	1.211918765
GRMZM2G089936	-0.636490883	0.813797671	0.244213829	0.794970891	-1.240815502	-1.105318189	-0.653262666	-0.174575701	2.998020796	-1.032943298	-0.523619123	-1.184000049	1.568142731	-2.998020796	-0.439462999	-0.188425032	-2.645701413	-2.468001988	-0.469675385	0.146974467	-0.098927729	-1.130769373	0.547203211	-1.501786817	-0.237202109	-0.230202032	-0.823319923	2.171527717	0.74010031	0.030656506	1.48107362	0.976525035	0.998710851	-0.603470624	-0.307908216	-1.117953259	-1.156974916	-0.424507616	-0.767246816	-0.409646587	-1.368372038	-1.197842699	-0.785662535	-0.35105981	-0.071581727	-0.037471962	-1.422465003	0.258273739	1.255660378
GRMZM5G834596	-1.240815502	0.923055543	0.202310601	-1.48107362	-1.368372038	-0.571095686	1.255660378	0.223213218	0.653262666	-1.117953259	-1.032943298	0.133217035	2.645701413	0.064754379	0.547203211	-0.944119285	-0.023842473	0.315058297	-0.237202109	-0.6448541	0.085246759	-0.500322766	-0.83291742	-1.523165155	0.587206217	0.251237576	-1.591873889	0.003405752	-0.209267873	1.501786817	-0.307908216	-0.687372812	0.892205847	-1.642224543	-0.174575701	-1.156974916	-1.697120332	0.74010031	1.156974916	0.687372812	-1.902810954	0.83291742	0.794970891	0.670220259	-0.140092436	0.776421761	1.211918765	0.636490883	1.286210621
GRMZM2G101020	0.322224522	0.687372812	1.056453949	0.611662814	0.409646587	-0.713488578	0.758136008	-0.842592259	2.645701413	0.987557182	1.255660378	1.143773961	1.726602201	0.300773842	0.579132162	-0.010217413	-0.813797671	-0.293654744	0.500322766	0.484942137	-2.045954276	-1.946202375	0.813797671	1.009990169	-0.731172307	-1.105318189	-1.092857156	1.825439172	0.446977502	0.696025208	0.45451733	-1.143773961	-0.462083086	-0.329407333	0.343824517	-0.167663737	-0.307908216	0.776421761	0.126347925	0.43197323	-0.539308633	-0.365586148	0.044289159	-0.300773842	-0.09208509	0.057930049	0.547203211	-0.785662535	0.202310601
GRMZM5G816110	-0.09208509	0.531447525	1.441453795	0.91267586	-0.153863466	-1.825439172	0.998710851	-0.523619123	2.345104662	0.251237576	1.226239142	0.587206217	1.105318189	-1.351202935	-0.852346618	0.078412413	-0.704730028	-1.697120332	0.119484771	-0.933535639	-1.790524917	-1.368372038	0.133217035	-0.078412413	0.687372812	-0.343824517	-0.307908216	0.003405752	-0.023842473	0.112627241	-1.318010897	-0.804348643	0.35105981	-1.757666049	-1.403975696	-1.33442315	-0.181496015	0.09208509	-0.424507616	0.057930049	-1.902810954	0.547203211	1.790524917	-0.293654744	0.6448541	2.104600628	-1.545263217	0.230202032	-0.492617885
GRMZM2G521844	-0.539308633	1.197842699	0.402250065	-0.902393588	0.078412413	-0.105775004	0.508057465	-0.209267873	-2.998020796	1.616536998	0.628171949	1.056453949	2.104600628	-0.223213218	-1.021399468	1.105318189	0.965610478	1.993601218	-0.722302208	0.563095926	-1.255660378	-0.133217035	-1.318010897	0.595318735	-0.661717677	-1.568142731	0.017029548	0.071581727	-0.965610478	1.790524917	1.501786817	0.188425032	0.785662535	-1.545263217	0.098927729	0.661717677	0.105775004	0.579132162	1.184000049	0.195363108	-1.441453795	0.146974467	0.462083086	0.133217035	0.030656506	0.057930049	1.441453795	0.174575701	2.249880663
GRMZM2G002918	0.43197323	-0.105775004	0.098927729	-2.998020796	0.563095926	1.143773961	0.571095686	0.477294855	-0.424507616	0.167663737	1.255660378	1.616536998	-2.645701413	0.998710851	1.993601218	0.653262666	-0.539308633	0.230202032	0.286550499	-0.160759774	2.249880663	0.785662535	-2.468001988	-2.345104662	-2.249880663	-2.171527717	1.105318189	0.223213218	0.954809756	1.318010897	-0.230202032	0.611662814	1.092857156	0.661717677	0.91267586	0.555132042	1.403975696	1.790524917	0.387522319	-0.09208509	-0.119484771	-2.045954276	1.286210621	0.044289159	-0.167663737	-0.365586148	-0.446977502	-0.051108415	-0.469675385
GRMZM2G047434	1.441453795	-0.417065588	0.209267873	-0.722302208	1.591873889	1.422465003	1.48107362	-0.91267586	-2.645701413	1.301946185	-0.842592259	-1.351202935	-0.09208509	-0.112627241	-0.146974467	-1.032943298	1.143773961	0.51582268	-0.998710851	0.153863466	-0.469675385	1.032943298	-2.104600628	0.902393588	0.051108415	-0.83291742	-0.322224522	-1.568142731	-0.365586148	0.6448541	0.976525035	0.882109877	0.071581727	-0.307908216	1.117953259	1.568142731	0.678771572	0.409646587	-0.424507616	0.91267586	0.030656506	-0.923055543	0.112627241	-0.74010031	-0.329407333	0.508057465	-0.492617885	0.279460686	0.195363108
GRMZM2G125669	0.044289159	0.603470624	-0.105775004	-0.882109877	0.43197323	-0.216235289	-0.45451733	-0.402250065	1.48107362	1.757666049	0.954809756	0.933535639	1.642224543	0.804348643	0.209267873	0.119484771	1.545263217	-1.170380633	-1.757666049	-0.83291742	0.555132042	-0.300773842	0.987557182	1.184000049	0.336607179	-0.813797671	-0.409646587	0.195363108	0.223213218	1.825439172	-0.037471962	0.758136008	0.188425032	-0.731172307	-0.976525035	-1.130769373	-0.998710851	2.104600628	1.501786817	-0.09208509	-1.226239142	0.064754379	-2.645701413	0.160759774	-0.571095686	0.202310601	0.670220259	-1.211918765	-1.105318189
GRMZM2G171078	-0.508057465	1.021399468	-0.380190046	0.43197323	-0.933535639	0.852346618	0.722302208	-2.998020796	1.301946185	-0.794970891	-0.862182757	0.965610478	0.933535639	1.286210621	-0.462083086	-1.130769373	0.785662535	0.944119285	-0.595318735	0.300773842	0.882109877	-0.286550499	0.687372812	0.365586148	2.249880663	-2.645701413	1.545263217	1.697120332	1.862731867	0.678771572	1.460977052	0.587206217	1.946202375	-0.872103029	-0.336607179	-2.468001988	0.051108415	-0.35105981	0.112627241	0.293654744	-0.492617885	0.133217035	-2.345104662	-0.329407333	0.126347925	-2.249880663	0.010217413	-1.080563549	0.160759774
GRMZM2G375113	2.998020796	0.767246816	0.230202032	1.351202935	2.345104662	-1.545263217	-1.862731867	-0.286550499	1.902810954	-1.993601218	1.460977052	-0.661717677	0.7490877	-0.188425032	0.010217413	0.417065588	-0.83291742	-0.902393588	-1.591873889	0.43197323	-0.882109877	-0.492617885	-0.202310601	1.368372038	0.882109877	0.603470624	-1.068431117	0.902393588	1.117953259	1.642224543	0.74010031	-0.037471962	-0.944119285	-2.998020796	1.48107362	0.300773842	-0.417065588	-0.112627241	-0.587206217	1.211918765	-0.051108415	-0.098927729	1.591873889	-0.35105981	0.160759774	-1.301946185	-1.156974916	0.237202109	0.45451733
GRMZM5G863602	-0.43197323	-0.804348643	0.785662535	0.758136008	-0.300773842	-0.670220259	-0.704730028	0.160759774	2.249880663	0.696025208	-0.244213829	-0.167663737	0.030656506	-0.230202032	0.555132042	-0.265322712	-0.587206217	-0.794970891	0.146974467	-0.286550499	-0.713488578	-0.272384894	0.174575701	0.439462999	0.862182757	-0.547203211	-0.965610478	1.032943298	1.197842699	0.636490883	1.184000049	0.133217035	-1.422465003	-2.104600628	0.424507616	-0.322224522	-0.153863466	0.098927729	-0.976525035	0.933535639	-1.523165155	-1.790524917	0.085246759	1.270787244	0.882109877	-0.678771572	-0.776421761	-0.872103029	-0.023842473
GRMZM2G071059	0.230202032	0.358313528	-1.080563549	0.523619123	-0.098927729	-1.226239142	0.160759774	-0.45451733	-0.852346618	2.045954276	1.130769373	1.993601218	0.508057465	-0.776421761	-0.587206217	-0.508057465	-0.579132162	-0.804348643	1.032943298	0.35105981	-1.697120332	-1.523165155	0.424507616	-0.83291742	-1.105318189	-2.998020796	-1.056453949	0.794970891	-0.322224522	1.33442315	1.143773961	-0.933535639	0.380190046	0.394875486	-1.032943298	-2.171527717	-0.409646587	0.628171949	-0.140092436	0.286550499	-1.993601218	2.171527717	1.825439172	0.74010031	0.119484771	1.862731867	-0.402250065	0.731172307	0.776421761
GRMZM2G170382	0.547203211	0.112627241	0.279460686	1.270787244	0.044289159	-0.758136008	0.098927729	-1.403975696	-2.468001988	0.902393588	0.223213218	0.687372812	-0.852346618	-0.251237576	-2.045954276	-0.794970891	-0.057930049	-0.462083086	2.345104662	-0.293654744	-1.669043821	-0.153863466	0.174575701	0.202310601	0.372878156	-0.387522319	-1.197842699	1.902810954	-0.051108415	1.993601218	0.619896262	0.469675385	0.105775004	0.244213829	-0.965610478	0.571095686	-0.146974467	0.387522319	-0.767246816	1.318010897	-1.021399468	-0.998710851	0.078412413	-1.286210621	-1.170380633	-0.365586148	-0.329407333	-0.813797671	1.501786817
GRMZM2G042173	0.230202032	-0.402250065	-0.336607179	-0.030656506	0.998710851	1.545263217	0.010217413	0.842592259	-2.645701413	1.143773961	-0.823319923	1.902810954	0.174575701	-0.160759774	-0.595318735	-0.7490877	2.171527717	1.642224543	-2.171527717	1.697120332	0.687372812	-0.477294855	-1.825439172	0.112627241	0.804348643	0.439462999	0.965610478	-1.368372038	-0.365586148	-1.184000049	-0.003405752	0.892205847	0.300773842	0.315058297	1.009990169	1.441453795	0.343824517	-1.501786817	-0.91267586	-0.862182757	-1.170380633	-0.587206217	-0.976525035	-0.09208509	1.197842699	-0.202310601	-1.286210621	-1.130769373	-0.852346618
GRMZM2G059151	0.469675385	0.51582268	-0.174575701	1.616536998	-0.965610478	-0.272384894	0.358313528	0.329407333	-2.998020796	-0.336607179	0.424507616	-1.226239142	0.085246759	0.037471962	-0.105775004	0.965610478	-0.670220259	-0.45451733	0.462083086	-1.021399468	-0.661717677	1.422465003	-0.051108415	0.409646587	0.492617885	0.670220259	-0.547203211	0.336607179	-0.322224522	1.460977052	1.240815502	0.098927729	-0.439462999	-1.184000049	0.852346618	1.697120332	0.902393588	1.669043821	-0.678771572	0.223213218	0.244213829	-0.7490877	-0.713488578	-1.117953259	-0.300773842	0.794970891	0.661717677	-1.240815502	0.064754379
GRMZM2G065731	0.944119285	0.112627241	-0.394875486	0.965610478	0.872103029	0.547203211	-0.74010031	-0.563095926	-1.946202375	1.286210621	-0.030656506	1.318010897	-0.45451733	-0.300773842	0.678771572	0.45451733	0.882109877	0.336607179	-0.571095686	1.056453949	-0.439462999	-0.424507616	-1.197842699	2.249880663	-0.446977502	0.35105981	0.492617885	-0.954809756	-0.6448541	0.223213218	0.126347925	0.484942137	-0.071581727	-0.976525035	0.09208509	0.804348643	0.133217035	0.713488578	-0.998710851	-0.51582268	0.523619123	-0.611662814	-2.998020796	-1.501786817	-0.003405752	-0.057930049	-0.862182757	-0.329407333	-0.823319923
GRMZM2G079574	0.209267873	1.385954264	-0.195363108	-2.998020796	1.226239142	-2.645701413	-2.468001988	0.696025208	1.757666049	-0.424507616	-2.249880663	-0.078412413	1.697120332	0.244213829	-0.439462999	-0.133217035	0.862182757	-2.104600628	-2.045954276	0.998710851	0.365586148	0.842592259	1.946202375	0.258273739	-1.993601218	-0.071581727	-1.902810954	0.882109877	1.825439172	0.394875486	1.211918765	-0.563095926	1.105318189	0.307908216	-1.862731867	1.080563549	0.230202032	-1.790524917	1.669043821	-1.757666049	-0.409646587	1.902810954	-1.726602201	0.044289159	1.351202935	-1.697120332	0.51582268	-1.669043821	-0.017029548
GRMZM2G043636	0.555132042	0.83291742	-2.998020796	0.954809756	0.258273739	-2.645701413	1.368372038	0.030656506	-2.249880663	1.117953259	-0.057930049	1.48107362	-0.343824517	1.301946185	-2.171527717	-2.104600628	-2.045954276	-0.216235289	1.642224543	0.687372812	1.156974916	-0.462083086	-1.993601218	-0.119484771	0.619896262	-0.181496015	-0.293654744	0.477294855	-1.946202375	0.51582268	0.823319923	0.272384894	0.424507616	0.785662535	-0.539308633	-1.902810954	-0.003405752	0.230202032	1.270787244	1.902810954	1.170380633	-1.862731867	0.794970891	-1.825439172	0.380190046	-0.315058297	-1.790524917	1.757666049	0.758136008
GRMZM5G866699	-0.153863466	-0.112627241	-2.998020796	-0.387522319	0.329407333	0.687372812	1.318010897	-0.571095686	-2.645701413	0.45451733	-1.726602201	1.286210621	-0.998710851	-0.030656506	-0.902393588	-0.237202109	0.09208509	1.642224543	-2.468001988	-0.74010031	0.251237576	-2.249880663	-0.767246816	-1.080563549	0.439462999	-1.068431117	0.195363108	-0.286550499	-0.300773842	0.661717677	1.211918765	-1.197842699	-0.372878156	-0.785662535	-1.422465003	0.279460686	0.523619123	-0.258273739	-1.591873889	-1.156974916	1.301946185	-0.051108415	0.776421761	-1.318010897	-0.174575701	0.882109877	-0.265322712	-0.071581727	1.156974916
GRMZM2G013038	-0.051108415	0.704730028	-2.998020796	1.197842699	1.902810954	2.104600628	1.825439172	-2.645701413	0.823319923	1.523165155	1.993601218	1.301946185	0.286550499	1.862731867	-2.345104662	1.255660378	2.998020796	2.345104662	-2.249880663	-2.171527717	-1.993601218	-1.946202375	0.508057465	-1.902810954	0.35105981	-1.862731867	0.661717677	-1.825439172	-1.790524917	-1.757666049	-1.726602201	-1.697120332	-1.642224543	0.933535639	-1.616536998	0.153863466	-1.591873889	0.146974467	0.998710851	-1.545263217	-1.523165155	1.130769373	-1.501786817	0.030656506	0.057930049	0.387522319	1.368372038	0.329407333	-0.017029548
GRMZM2G071768	0.105775004	-0.469675385	-0.587206217	1.351202935	0.628171949	-0.619896262	0.776421761	-0.492617885	-2.998020796	1.184000049	0.160759774	1.591873889	1.318010897	-0.83291742	-0.563095926	0.133217035	-0.417065588	0.862182757	-0.944119285	1.130769373	-1.080563549	-0.037471962	-2.171527717	-0.023842473	-0.91267586	-0.424507616	-0.439462999	-0.315058297	-0.653262666	2.045954276	2.998020796	0.417065588	0.794970891	-0.687372812	-0.126347925	1.068431117	0.902393588	0.508057465	0.322224522	0.595318735	-0.181496015	0.216235289	0.722302208	-0.785662535	-0.051108415	0.998710851	0.83291742	0.265322712	0.619896262
GRMZM2G075283	-0.188425032	1.902810954	-0.872103029	-2.998020796	-0.160759774	0.051108415	-0.044289159	0.794970891	0.064754379	1.501786817	1.403975696	0.402250065	0.882109877	-2.645701413	-0.394875486	-0.998710851	1.441453795	1.591873889	0.462083086	-2.468001988	1.255660378	-2.345104662	0.492617885	0.902393588	-0.272384894	-0.119484771	-0.402250065	-0.105775004	0.439462999	2.171527717	0.119484771	1.197842699	0.365586148	1.726602201	0.547203211	-2.171527717	0.105775004	2.045954276	-0.146974467	-2.104600628	-2.045954276	1.211918765	0.944119285	1.568142731	2.345104662	-0.653262666	-0.767246816	0.258273739	0.508057465
GRMZM2G057975	-2.998020796	-2.645701413	-2.468001988	-2.345104662	0.265322712	-2.249880663	-2.171527717	-2.104600628	-0.064754379	-1.946202375	-1.902810954	0.085246759	0.776421761	-1.790524917	0.112627241	-0.09208509	0.579132162	0.595318735	0.51582268	0.394875486	-1.726602201	0.477294855	0.153863466	-1.697120332	-1.669043821	-1.642224543	-1.591873889	0.704730028	-1.568142731	0.230202032	0.696025208	-1.523165155	-1.501786817	-1.48107362	-1.460977052	-1.441453795	-1.422465003	1.105318189	-0.030656506	0.902393588	0.998710851	1.403975696	-1.385954264	0.064754379	0.251237576	1.441453795	0.037471962	1.902810954	-1.368372038
GRMZM2G150295	1.862731867	0.862182757	-0.628171949	-0.112627241	2.249880663	0.105775004	0.678771572	-2.345104662	-1.757666049	-0.126347925	2.045954276	0.976525035	0.595318735	0.085246759	0.265322712	-1.170380633	1.385954264	-0.394875486	-0.758136008	-0.51582268	-1.726602201	-0.051108415	1.270787244	0.842592259	0.998710851	-1.441453795	-0.133217035	-0.230202032	0.279460686	0.776421761	1.501786817	-0.322224522	0.785662535	0.023842473	0.258273739	1.032943298	-1.642224543	-0.722302208	0.731172307	0.044289159	-0.579132162	-0.09208509	0.112627241	1.790524917	-0.91267586	-0.105775004	0.030656506	1.697120332	-0.595318735
GRMZM2G129218	-0.954809756	0.484942137	-0.477294855	2.998020796	1.032943298	-0.329407333	0.126347925	0.037471962	-2.645701413	0.862182757	1.523165155	1.642224543	1.318010897	1.726602201	2.645701413	0.731172307	-1.270787244	-1.080563549	-1.642224543	0.965610478	1.286210621	0.462083086	-1.197842699	1.368372038	-0.603470624	0.722302208	-0.492617885	-0.923055543	-1.385954264	0.595318735	-0.322224522	-0.071581727	-0.126347925	0.611662814	-0.523619123	-1.545263217	0.394875486	1.130769373	0.523619123	-0.251237576	0.51582268	0.057930049	-0.7490877	-1.056453949	-1.105318189	-0.017029548	0.713488578	-0.223213218	-0.051108415
GRMZM2G128564	1.441453795	0.670220259	1.105318189	-0.484942137	0.133217035	-1.092857156	0.071581727	0.105775004	2.998020796	-0.119484771	-1.255660378	-0.531447525	2.171527717	-1.460977052	1.825439172	-1.226239142	-0.105775004	-0.160759774	0.064754379	-0.563095926	0.976525035	0.057930049	-0.380190046	0.653262666	0.023842473	1.211918765	-1.902810954	1.044626445	1.422465003	-1.403975696	-2.998020796	-1.757666049	-0.6448541	-2.104600628	0.579132162	-1.825439172	-0.174575701	-0.09208509	-0.492617885	0.794970891	-1.044626445	0.300773842	0.902393588	-1.318010897	0.119484771	1.545263217	-1.545263217	-1.143773961	-0.279460686
GRMZM2G143142	2.045954276	0.265322712	-0.017029548	-0.579132162	1.286210621	0.057930049	-1.240815502	-1.862731867	0.587206217	0.563095926	0.293654744	0.531447525	-0.146974467	0.83291742	-0.785662535	-0.202310601	1.009990169	0.380190046	2.249880663	-0.965610478	-0.188425032	-0.882109877	0.09208509	-0.758136008	-1.092857156	0.965610478	-0.670220259	0.477294855	-0.244213829	0.492617885	0.51582268	-0.852346618	-0.181496015	0.603470624	-0.628171949	0.237202109	-1.197842699	-0.272384894	-0.892205847	-0.030656506	-0.003405752	-1.757666049	0.636490883	0.892205847	-0.547203211	0.195363108	0.446977502	-0.064754379	-0.133217035
GRMZM2G057171	-0.484942137	-2.998020796	0.153863466	-2.645701413	1.130769373	-0.223213218	0.251237576	-0.153863466	-2.249880663	1.385954264	0.51582268	0.085246759	0.508057465	-2.045954276	-1.993601218	-0.071581727	1.156974916	-0.508057465	-1.946202375	1.33442315	-0.322224522	-0.09208509	0.216235289	-1.902810954	-0.174575701	-0.098927729	-0.329407333	0.852346618	0.713488578	1.460977052	-1.862731867	0.547203211	1.642224543	1.757666049	0.687372812	-1.825439172	-1.790524917	1.021399468	0.670220259	-0.244213829	0.174575701	-0.181496015	2.468001988	1.255660378	-0.343824517	0.258273739	-1.757666049	1.591873889	-0.037471962
GRMZM2G390345	0.571095686	-0.785662535	0.258273739	-1.170380633	0.126347925	2.045954276	0.105775004	-0.358313528	-2.045954276	-0.579132162	-0.923055543	1.642224543	-0.153863466	-0.329407333	-1.286210621	-0.892205847	0.902393588	1.501786817	-0.954809756	1.825439172	0.133217035	0.579132162	-0.74010031	0.387522319	0.358313528	0.064754379	0.279460686	-1.642224543	0.767246816	-1.255660378	0.587206217	0.523619123	-0.195363108	-1.545263217	0.167663737	1.946202375	0.265322712	-1.697120332	-0.804348643	1.170380633	-0.704730028	-1.318010897	-0.51582268	-0.126347925	1.385954264	0.813797671	-1.460977052	-1.211918765	-1.403975696
GRMZM2G095492	0.539308633	0.251237576	0.272384894	-0.976525035	-0.010217413	-0.539308633	-0.293654744	-0.160759774	-0.023842473	-0.003405752	-0.017029548	-0.731172307	0.017029548	-0.678771572	-2.249880663	-0.954809756	-0.258273739	-0.892205847	0.579132162	0.098927729	-0.83291742	-0.500322766	-0.336607179	-1.993601218	-1.009990169	-0.713488578	-1.240815502	-0.358313528	-0.555132042	0.195363108	-0.91267586	-2.468001988	-0.279460686	-1.441453795	-2.045954276	0.965610478	-0.776421761	0.057930049	-0.037471962	0.202310601	-1.226239142	0.872103029	-0.216235289	-0.071581727	1.403975696	1.021399468	1.117953259	-0.140092436	-0.188425032
GRMZM2G161102	-0.315058297	1.48107362	1.105318189	1.825439172	-0.365586148	-0.439462999	0.539308633	-1.757666049	-2.998020796	1.523165155	-0.547203211	2.468001988	0.776421761	0.030656506	-0.279460686	-0.571095686	-0.387522319	0.329407333	0.7490877	0.547203211	1.044626445	-0.804348643	-1.385954264	0.181496015	1.318010897	-1.301946185	0.469675385	1.184000049	-0.343824517	0.670220259	1.092857156	0.372878156	0.892205847	-0.902393588	-0.112627241	-0.140092436	-0.35105981	0.74010031	1.422465003	1.351202935	-0.653262666	0.508057465	-0.767246816	-0.43197323	0.153863466	1.211918765	0.794970891	-0.230202032	-0.358313528
GRMZM2G093908	0.272384894	1.501786817	-0.998710851	1.33442315	0.531447525	-1.270787244	-0.611662814	-0.258273739	1.032943298	1.946202375	-0.003405752	1.568142731	0.010217413	-1.697120332	0.933535639	-0.882109877	-0.842592259	-0.300773842	1.825439172	0.944119285	-0.387522319	0.030656506	2.104600628	-0.45451733	-1.080563549	0.500322766	-1.523165155	0.387522319	0.579132162	-0.174575701	-0.492617885	-0.687372812	0.051108415	-1.441453795	0.279460686	0.057930049	0.188425032	1.523165155	0.670220259	1.270787244	0.153863466	0.653262666	-0.112627241	0.45451733	0.539308633	1.130769373	-0.563095926	0.462083086	0.223213218
GRMZM2G002765	0.555132042	0.722302208	-2.104600628	-0.563095926	-1.068431117	0.133217035	0.902393588	-0.872103029	-2.468001988	1.568142731	-0.372878156	0.343824517	0.307908216	-1.211918765	-0.112627241	0.358313528	-0.852346618	-0.954809756	-1.044626445	0.439462999	-0.976525035	0.279460686	-0.892205847	-0.74010031	-0.628171949	-0.539308633	0.258273739	-1.825439172	-0.670220259	0.862182757	1.403975696	0.394875486	-1.862731867	-0.394875486	-1.117953259	1.422465003	-0.603470624	0.704730028	-1.422465003	1.197842699	-0.579132162	-1.009990169	0.998710851	0.794970891	1.211918765	0.595318735	0.579132162	-0.923055543	0.813797671
GRMZM2G096546	0.722302208	-0.653262666	-0.579132162	0.595318735	1.009990169	0.439462999	1.33442315	0.804348643	2.998020796	-0.439462999	1.056453949	1.301946185	2.045954276	0.523619123	-0.7490877	-1.403975696	-0.852346618	-0.030656506	-0.477294855	-0.923055543	0.892205847	-1.591873889	-0.209267873	0.547203211	1.993601218	0.133217035	0.343824517	2.645701413	1.211918765	2.345104662	1.240815502	0.944119285	0.380190046	-1.156974916	0.315058297	-1.056453949	-0.508057465	0.35105981	-0.587206217	-0.216235289	-1.862731867	-0.595318735	0.563095926	1.170380633	0.813797671	0.244213829	-0.112627241	-0.767246816	0.484942137
GRMZM2G157758	0.731172307	0.902393588	-1.021399468	0.484942137	0.892205847	-1.255660378	1.946202375	-0.944119285	0.133217035	0.74010031	1.993601218	0.462083086	-0.167663737	-0.293654744	-0.230202032	-0.587206217	-0.153863466	-1.545263217	1.825439172	0.272384894	-2.998020796	0.653262666	1.33442315	-0.023842473	0.098927729	0.195363108	-1.790524917	-0.071581727	-0.83291742	0.202310601	-0.146974467	-1.460977052	-0.358313528	1.545263217	-0.852346618	1.351202935	-1.170380633	-0.6448541	1.301946185	-0.776421761	0.358313528	1.068431117	0.209267873	0.329407333	-0.500322766	0.140092436	1.211918765	2.249880663	-0.258273739
GRMZM2G179715	-0.237202109	-0.230202032	-0.696025208	-0.365586148	0.776421761	-0.293654744	0.174575701	-0.611662814	-1.318010897	-0.653262666	0.209267873	1.068431117	-0.307908216	0.237202109	-2.468001988	-0.030656506	0.563095926	0.823319923	2.345104662	-0.842592259	-1.032943298	-0.563095926	0.704730028	-0.704730028	-0.722302208	-0.43197323	-0.424507616	1.032943298	0.265322712	1.351202935	1.211918765	0.279460686	1.301946185	-1.616536998	-0.439462999	-1.545263217	-0.167663737	0.492617885	-0.933535639	1.270787244	-2.645701413	-0.085246759	1.642224543	0.251237576	-0.372878156	0.7490877	-1.403975696	0.636490883	0.6448541
AC234528.1_FG004	-0.547203211	0.531447525	-0.230202032	-0.776421761	0.064754379	-0.661717677	0.7490877	0.279460686	0.343824517	1.318010897	-0.6448541	1.697120332	-0.767246816	0.09208509	0.037471962	0.462083086	0.057930049	0.133217035	2.645701413	0.43197323	-0.329407333	-0.265322712	0.923055543	-0.272384894	2.345104662	-0.587206217	0.45451733	1.441453795	0.160759774	0.902393588	0.731172307	-0.286550499	0.477294855	-0.595318735	-0.160759774	0.202310601	-0.43197323	-0.603470624	-1.385954264	0.653262666	-1.143773961	-1.697120332	0.842592259	0.776421761	-0.085246759	0.579132162	-0.628171949	0.678771572	1.523165155
GRMZM2G044503	0.862182757	-2.998020796	-0.244213829	-0.202310601	1.211918765	0.91267586	0.010217413	-1.184000049	-0.842592259	-0.030656506	-0.010217413	0.579132162	0.051108415	-0.882109877	-0.300773842	0.044289159	-0.329407333	-2.468001988	0.078412413	0.882109877	0.365586148	0.933535639	-2.345104662	0.133217035	0.085246759	0.661717677	1.318010897	-0.987557182	-0.965610478	-2.171527717	-0.872103029	-0.402250065	0.767246816	-2.104600628	1.301946185	0.003405752	1.056453949	-0.064754379	-0.343824517	-0.954809756	2.645701413	1.441453795	-2.045954276	-0.394875486	-0.223213218	0.758136008	0.030656506	0.704730028	-0.687372812
GRMZM2G162466	0.923055543	0.272384894	0.794970891	0.439462999	-2.998020796	-2.645701413	-0.365586148	-0.380190046	2.045954276	-2.249880663	-0.322224522	0.670220259	-0.133217035	-2.104600628	-2.045954276	-1.993601218	-0.010217413	0.112627241	-0.43197323	1.616536998	-1.946202375	-1.902810954	-1.862731867	-0.547203211	-1.825439172	0.579132162	1.523165155	1.403975696	1.48107362	-0.523619123	-0.555132042	1.255660378	0.343824517	0.678771572	-0.293654744	0.823319923	0.057930049	-1.726602201	-1.697120332	0.387522319	-1.669043821	-0.336607179	-0.402250065	0.140092436	-0.112627241	0.731172307	-0.51582268	-1.642224543	0.202310601
GRMZM2G458401	0.547203211	-2.998020796	-2.645701413	0.923055543	0.882109877	1.286210621	0.044289159	-2.468001988	-2.345104662	0.286550499	-0.071581727	0.017029548	0.057930049	0.146974467	-0.265322712	1.009990169	-0.603470624	-0.619896262	-2.249880663	-0.195363108	0.653262666	1.441453795	-0.003405752	0.731172307	-2.171527717	-0.223213218	0.098927729	-2.104600628	1.044626445	-2.045954276	0.003405752	0.45451733	-0.057930049	0.051108415	-0.300773842	-0.687372812	-1.993601218	-1.946202375	-1.902810954	-1.862731867	-0.230202032	0.987557182	-1.825439172	-1.790524917	0.188425032	-0.286550499	0.619896262	0.387522319	-0.017029548
GRMZM2G054765	1.568142731	-0.91267586	0.687372812	0.293654744	0.402250065	1.286210621	-0.044289159	1.032943298	-2.998020796	1.270787244	0.133217035	0.954809756	0.300773842	-0.902393588	0.167663737	1.009990169	1.422465003	0.722302208	-0.508057465	-0.258273739	-0.523619123	1.862731867	-1.902810954	0.872103029	-0.704730028	-0.571095686	-0.023842473	-1.044626445	-0.037471962	-0.500322766	0.477294855	1.825439172	0.098927729	-0.272384894	-0.085246759	1.902810954	1.697120332	-0.976525035	-0.687372812	0.030656506	-0.477294855	-0.619896262	-1.460977052	-1.211918765	-0.265322712	-0.126347925	-1.105318189	-0.722302208	-0.892205847
GRMZM2G110726	0.037471962	-0.293654744	1.568142731	2.171527717	0.09208509	-1.105318189	2.249880663	-1.385954264	-2.998020796	1.757666049	0.078412413	1.902810954	1.697120332	-0.387522319	0.293654744	-0.064754379	1.032943298	1.226239142	0.119484771	0.722302208	-0.51582268	-0.044289159	-0.842592259	-0.315058297	0.216235289	-0.923055543	-1.068431117	0.188425032	-0.508057465	1.545263217	0.484942137	0.987557182	0.251237576	0.998710851	0.603470624	0.965610478	0.6448541	-0.872103029	-0.611662814	0.322224522	-0.133217035	-1.545263217	0.7490877	0.098927729	-0.153863466	1.301946185	0.43197323	0.477294855	-0.45451733
GRMZM2G074307	-0.45451733	0.579132162	0.279460686	1.009990169	-0.140092436	-0.417065588	-0.670220259	-2.249880663	-1.790524917	1.642224543	0.307908216	2.104600628	1.255660378	-1.545263217	-0.003405752	-0.126347925	-0.251237576	-0.300773842	0.91267586	0.611662814	1.226239142	-0.477294855	-0.446977502	0.057930049	0.439462999	-1.286210621	-1.825439172	1.501786817	1.318010897	0.085246759	0.329407333	-1.156974916	0.484942137	-0.017029548	-0.976525035	0.293654744	-0.704730028	2.171527717	0.74010031	-0.678771572	-1.255660378	0.251237576	0.508057465	0.133217035	0.547203211	0.6448541	-0.188425032	0.258273739	-0.380190046
GRMZM2G700655	0.051108415	-0.892205847	-1.092857156	-0.315058297	0.965610478	1.697120332	-0.636490883	-0.153863466	-2.171527717	0.230202032	-0.555132042	0.023842473	0.119484771	0.43197323	-1.068431117	0.704730028	0.902393588	2.104600628	0.017029548	-0.35105981	0.439462999	-0.272384894	-1.862731867	1.021399468	-0.322224522	-1.501786817	0.687372812	-2.998020796	0.923055543	0.523619123	-0.902393588	1.056453949	1.642224543	-0.105775004	0.146974467	0.571095686	0.492617885	-0.923055543	0.293654744	-0.258273739	0.380190046	-1.197842699	-2.645701413	-1.211918765	0.126347925	-0.010217413	-0.071581727	0.329407333	0.343824517
GRMZM2G119640	-0.661717677	0.251237576	-0.343824517	-0.003405752	-0.7490877	1.946202375	0.146974467	-0.872103029	-2.645701413	-0.492617885	-1.068431117	-0.078412413	-0.044289159	-0.098927729	-1.523165155	-0.794970891	1.318010897	1.156974916	-1.403975696	1.021399468	-0.653262666	0.085246759	-2.249880663	-0.823319923	1.056453949	-0.140092436	0.112627241	-1.862731867	-0.017029548	-0.636490883	0.500322766	0.704730028	0.365586148	-1.318010897	-0.216235289	0.83291742	-0.105775004	0.044289159	0.293654744	0.265322712	-0.237202109	-0.258273739	-0.188425032	-0.813797671	0.670220259	1.240815502	-0.687372812	-1.021399468	0.579132162
GRMZM2G035778	0.713488578	0.35105981	-0.286550499	-0.315058297	0.300773842	0.265322712	0.307908216	-1.130769373	-2.998020796	1.902810954	1.368372038	1.092857156	-0.45451733	-0.713488578	-0.933535639	-0.195363108	0.862182757	0.336607179	0.500322766	0.017029548	1.545263217	1.591873889	-1.48107362	-0.336607179	-1.993601218	-0.882109877	-0.251237576	-1.211918765	-0.272384894	1.403975696	1.568142731	2.249880663	0.954809756	-1.270787244	1.286210621	1.993601218	-0.023842473	0.892205847	0.085246759	0.343824517	-0.078412413	0.322224522	-0.140092436	-0.044289159	0.174575701	-1.385954264	-0.531447525	-0.133217035	0.696025208
GRMZM2G164020	1.33442315	-0.010217413	0.91267586	0.531447525	0.704730028	0.439462999	0.74010031	-1.669043821	2.249880663	0.555132042	-0.071581727	0.237202109	1.156974916	-0.315058297	0.126347925	0.300773842	0.133217035	-0.300773842	0.09208509	-1.460977052	0.579132162	-0.713488578	0.965610478	-0.230202032	1.591873889	0.731172307	0.387522319	1.441453795	1.226239142	0.174575701	-1.286210621	-0.365586148	0.265322712	-1.726602201	1.351202935	-0.767246816	0.758136008	0.417065588	-0.7490877	1.545263217	-0.965610478	-0.776421761	0.923055543	0.119484771	0.933535639	0.944119285	-0.023842473	-0.872103029	-0.119484771
GRMZM2G114572	-0.380190046	0.202310601	-0.244213829	-0.251237576	0.251237576	-1.545263217	0.539308633	-1.757666049	-2.468001988	0.500322766	-0.539308633	0.265322712	0.462083086	-1.286210621	-0.272384894	-1.044626445	0.628171949	-0.133217035	0.74010031	-0.43197323	-1.301946185	-1.105318189	-0.286550499	-0.872103029	-1.726602201	-0.167663737	-0.446977502	1.068431117	0.923055543	1.616536998	0.293654744	1.056453949	0.394875486	-0.611662814	-0.595318735	0.579132162	0.595318735	-0.209267873	-2.998020796	0.017029548	-0.823319923	-0.202310601	-1.501786817	-0.852346618	1.568142731	1.184000049	-1.422465003	0.230202032	-0.051108415
GRMZM2G153058	1.385954264	-1.117953259	0.279460686	-0.477294855	0.731172307	1.170380633	0.704730028	-0.051108415	-2.468001988	0.300773842	-0.923055543	0.43197323	-0.057930049	0.146974467	-0.343824517	0.223213218	1.032943298	0.794970891	-0.628171949	1.501786817	-0.030656506	0.531447525	-1.092857156	0.003405752	0.358313528	0.244213829	0.343824517	-1.170380633	-0.112627241	-0.293654744	1.825439172	2.045954276	0.174575701	0.119484771	0.09208509	1.270787244	0.987557182	-0.017029548	-1.862731867	1.092857156	-0.45451733	-1.270787244	-1.993601218	-1.460977052	0.372878156	-0.223213218	-0.704730028	0.044289159	-0.037471962
GRMZM2G569356	-1.501786817	-0.687372812	-1.403975696	-0.307908216	0.195363108	0.223213218	0.439462999	0.758136008	1.993601218	-0.965610478	0.402250065	0.587206217	1.33442315	1.117953259	-1.757666049	0.126347925	1.591873889	-0.372878156	0.678771572	-0.417065588	0.216235289	0.358313528	-0.140092436	-0.678771572	1.105318189	-0.439462999	0.409646587	0.336607179	0.933535639	-0.160759774	-0.446977502	0.098927729	-0.923055543	0.307908216	-0.071581727	0.976525035	-1.422465003	0.064754379	1.044626445	-0.892205847	-0.343824517	1.368372038	1.240815502	0.329407333	-1.143773961	-0.902393588	0.603470624	2.249880663	-0.051108415
GRMZM2G021202	-2.998020796	0.372878156	0.91267586	-2.645701413	1.523165155	-2.468001988	0.500322766	-2.345104662	1.301946185	-2.171527717	-2.104600628	-2.045954276	0.579132162	-1.946202375	0.293654744	0.09208509	0.477294855	-1.902810954	-1.862731867	-1.825439172	-1.757666049	1.616536998	1.422465003	-1.726602201	2.468001988	-1.697120332	0.279460686	-1.642224543	-1.616536998	-1.591873889	-1.568142731	-0.010217413	1.642224543	-1.523165155	-1.501786817	0.636490883	0.852346618	-1.460977052	0.944119285	-1.441453795	0.74010031	-1.422465003	-0.023842473	-1.403975696	0.251237576	1.009990169	-1.385954264	1.184000049	0.722302208
GRMZM2G012052	-1.130769373	0.133217035	-0.202310601	-0.315058297	-0.146974467	-0.500322766	-0.35105981	-1.301946185	-2.998020796	-0.758136008	-0.687372812	-0.7490877	0.696025208	0.409646587	-2.171527717	-0.902393588	0.387522319	-0.098927729	0.804348643	0.74010031	-2.104600628	-1.105318189	0.030656506	-0.571095686	0.571095686	-1.441453795	-0.044289159	0.7490877	-0.653262666	1.697120332	1.197842699	0.098927729	0.051108415	0.813797671	-0.265322712	0.83291742	-1.184000049	0.286550499	0.293654744	-0.023842473	-0.492617885	1.301946185	1.117953259	0.965610478	-0.372878156	0.6448541	0.587206217	-0.071581727	0.037471962
GRMZM2G084279	1.211918765	-0.704730028	-0.902393588	-0.462083086	0.402250065	-0.329407333	0.776421761	-0.628171949	-2.998020796	0.286550499	-0.595318735	-0.071581727	-0.758136008	-0.813797671	-0.286550499	-0.336607179	0.678771572	-0.126347925	-0.987557182	0.7490877	-2.045954276	-1.009990169	0.892205847	-0.372878156	0.758136008	-0.394875486	1.130769373	0.112627241	1.301946185	1.368372038	0.74010031	1.862731867	2.249880663	-0.872103029	-0.547203211	-0.343824517	0.336607179	0.188425032	-0.6448541	1.403975696	-0.713488578	-1.130769373	-1.301946185	-1.092857156	-0.307908216	-0.91267586	-0.300773842	-0.402250065	0.477294855
[truncated: 248 more columns]
