# Supplementary material for: Verification of Three-Phase Dependency Analysis Bayesian Network Learning Method for Maize Carotenoid Gene Mining
Source: Biomed Res Int. 2017 Jul 30;2017:1813494. doi: 10.1155/2017/1813494 (PMC5554554; doi:10.1155/2017/1813494)
Supplement: Supplementary file 1 — The experiment data 1 of 109 nodes, the experiment data 2 of 109 nodes, and so on are shown here. [file 1813494.f1.zip › Supplementary material/Gene100_8.csv]

V1	V2	V3	V4	V5	V6	V7	V8	V9	V10	V11	V12	V13	V14	V15	V16	V17	V18	V19	V20	V21	V22	V23	V24	V25	V26	V27	V28	V29	V30	V31	V32	V33	V34	V35	V36	V37	V38	V39	V40	V41	V42	V43	V44	V45	V46	V47	V48	V49	V50
GRMZM2G048010	-0.037471962	0.293654744	1.021399468	0.998710851	-0.064754379	0.160759774	-1.197842699	0.409646587	2.998020796	0.619896262	0.892205847	0.661717677	-0.202310601	-1.056453949	-0.587206217	-1.270787244	-1.092857156	-1.368372038	0.539308633	0.704730028	-1.351202935	-1.862731867	0.653262666	0.057930049	-0.223213218	0.133217035	0.91267586	2.171527717	1.697120332	1.757666049	2.345104662	1.184000049	-0.380190046	-1.946202375	-0.998710851	-0.181496015	-0.244213829	-1.170380633	0.500322766	1.056453949	-0.696025208	-0.153863466	-0.813797671	-0.358313528	0.09208509	-0.74010031	-1.044626445	0.794970891	-0.017029548
GRMZM2G178916	-0.823319923	0.539308633	-0.91267586	0.223213218	-0.003405752	0.776421761	0.944119285	-1.757666049	-0.842592259	-0.547203211	0.531447525	1.044626445	1.068431117	0.35105981	0.722302208	0.547203211	0.636490883	0.43197323	1.240815502	0.003405752	-0.603470624	-0.670220259	0.258273739	-1.197842699	-2.345104662	-0.237202109	-0.307908216	-0.09208509	0.365586148	0.286550499	0.358313528	0.813797671	0.500322766	0.071581727	1.156974916	0.555132042	0.611662814	-0.140092436	-0.678771572	1.669043821	0.265322712	0.188425032	-1.568142731	-1.697120332	-0.484942137	0.484942137	-1.669043821	0.146974467	-0.469675385
GRMZM2G477314	-0.636490883	1.301946185	-0.153863466	-0.003405752	-0.872103029	-0.794970891	1.993601218	-2.249880663	0.209267873	-0.372878156	-0.653262666	0.670220259	0.804348643	0.380190046	-0.823319923	-0.409646587	-1.286210621	-0.83291742	0.776421761	0.636490883	-0.892205847	-1.226239142	-0.358313528	0.343824517	-0.030656506	-0.933535639	-0.078412413	1.130769373	1.255660378	1.056453949	1.862731867	0.329407333	1.33442315	-1.669043821	-0.611662814	-0.258273739	-1.170380633	-0.112627241	1.270787244	0.83291742	-1.117953259	1.642224543	1.044626445	-0.251237576	-0.105775004	1.092857156	0.174575701	-1.092857156	0.794970891
GRMZM2G453956	1.460977052	-2.998020796	0.842592259	0.181496015	0.329407333	-2.645701413	-2.468001988	-0.563095926	-2.171527717	-2.104600628	-0.380190046	0.758136008	1.009990169	0.223213218	-0.307908216	0.023842473	-1.993601218	1.825439172	-1.946202375	-1.902810954	2.645701413	0.160759774	-1.862731867	0.044289159	-1.825439172	-0.003405752	-1.790524917	-0.279460686	0.446977502	0.085246759	-1.757666049	-0.057930049	0.508057465	-0.394875486	0.195363108	1.368372038	1.642224543	-0.500322766	-0.508057465	1.184000049	-1.669043821	1.902810954	-1.642224543	-0.365586148	0.687372812	-0.078412413	0.279460686	0.611662814	-1.616536998
GRMZM2G324903	-0.037471962	1.156974916	0.696025208	-0.776421761	0.315058297	0.439462999	0.286550499	0.477294855	-1.286210621	1.48107362	-0.216235289	1.902810954	2.249880663	0.51582268	-0.078412413	-1.757666049	1.301946185	0.653262666	0.500322766	0.987557182	2.104600628	-1.240815502	-1.545263217	0.555132042	-1.080563549	0.237202109	0.146974467	1.117953259	0.571095686	1.33442315	1.032943298	0.902393588	0.251237576	-1.117953259	0.83291742	-0.387522319	-0.439462999	0.469675385	1.092857156	0.010217413	-1.993601218	1.318010897	1.080563549	-0.547203211	-0.74010031	-0.628171949	0.105775004	-0.446977502	-0.402250065
GRMZM2G017157	0.794970891	1.825439172	1.286210621	0.595318735	0.279460686	-0.91267586	1.021399468	-1.642224543	-0.126347925	1.422465003	-0.380190046	0.402250065	0.882109877	0.484942137	1.318010897	0.603470624	-0.563095926	0.713488578	-2.998020796	-0.678771572	1.170380633	0.6448541	-0.670220259	-0.579132162	-0.078412413	0.146974467	-0.83291742	0.477294855	-0.713488578	-0.965610478	-0.085246759	-1.143773961	-0.010217413	1.993601218	-1.669043821	-0.244213829	0.023842473	0.057930049	1.092857156	-0.571095686	-0.862182757	0.531447525	-2.468001988	-0.293654744	-0.202310601	0.209267873	1.211918765	2.998020796	1.368372038
GRMZM2G123872	1.33442315	0.722302208	-0.424507616	0.126347925	1.301946185	0.251237576	1.591873889	0.105775004	1.790524917	0.678771572	-1.616536998	1.170380633	1.825439172	0.91267586	0.954809756	-0.944119285	0.933535639	1.460977052	0.785662535	0.43197323	-1.143773961	-1.902810954	0.336607179	0.133217035	1.441453795	-1.757666049	0.823319923	0.244213829	0.923055543	1.368372038	1.501786817	1.523165155	1.946202375	-1.385954264	0.153863466	-0.037471962	-1.092857156	-1.009990169	-0.696025208	-1.080563549	-1.032943298	1.616536998	-0.402250065	-0.085246759	0.380190046	0.531447525	0.300773842	-0.619896262	-0.146974467
GRMZM2G314520	0.531447525	1.130769373	0.954809756	-1.422465003	-0.439462999	0.272384894	1.726602201	-0.987557182	1.501786817	-0.112627241	-1.255660378	0.387522319	1.790524917	-0.661717677	-0.539308633	-1.318010897	0.91267586	-0.722302208	-1.197842699	-2.171527717	-1.032943298	-1.226239142	0.380190046	-1.642224543	-0.251237576	1.318010897	0.010217413	-0.611662814	0.477294855	-0.272384894	-0.202310601	0.595318735	0.195363108	-2.998020796	-0.83291742	0.713488578	-0.523619123	0.670220259	1.117953259	-0.146974467	-1.568142731	0.704730028	1.226239142	0.329407333	0.43197323	1.021399468	-1.48107362	-0.91267586	-0.105775004
AC217962.3_FG005	0.776421761	-0.064754379	-0.372878156	-0.216235289	-0.167663737	0.976525035	0.469675385	-0.424507616	-2.345104662	0.167663737	-1.170380633	0.51582268	0.003405752	-0.6448541	-0.678771572	-0.579132162	0.322224522	0.181496015	-1.669043821	0.462083086	0.160759774	1.403975696	-1.902810954	0.722302208	1.211918765	-0.944119285	0.140092436	-1.591873889	0.731172307	0.010217413	0.500322766	0.044289159	0.365586148	-0.872103029	1.226239142	1.068431117	1.642224543	-0.758136008	-0.722302208	-0.286550499	-0.500322766	-1.117953259	-0.563095926	-0.017029548	1.460977052	0.45451733	-0.409646587	-0.051108415	-0.823319923
GRMZM2G042250	1.545263217	-1.318010897	0.300773842	0.892205847	0.35105981	1.270787244	-0.439462999	0.43197323	-1.368372038	-0.372878156	-0.037471962	1.255660378	-1.240815502	0.195363108	-0.195363108	0.523619123	1.197842699	0.758136008	-0.140092436	-0.547203211	-1.056453949	1.032943298	-0.704730028	-0.044289159	-0.017029548	-0.923055543	-0.563095926	-1.385954264	0.394875486	-1.545263217	-0.023842473	1.092857156	-0.358313528	-1.48107362	-0.91267586	1.501786817	1.523165155	-0.51582268	-1.105318189	1.021399468	-0.329407333	0.547203211	-1.902810954	-2.045954276	0.126347925	0.181496015	-1.130769373	-1.568142731	-0.539308633
GRMZM2G060999	1.318010897	0.758136008	-1.351202935	0.611662814	1.240815502	1.170380633	-1.669043821	-0.670220259	-1.825439172	1.080563549	-0.579132162	0.343824517	-0.105775004	-0.998710851	-0.380190046	0.119484771	1.697120332	0.571095686	1.009990169	-0.758136008	-1.143773961	-0.112627241	-2.345104662	1.301946185	-0.555132042	-0.307908216	-0.216235289	-0.43197323	2.468001988	-0.563095926	1.351202935	0.469675385	-0.174575701	-0.037471962	0.628171949	0.965610478	-0.6448541	-1.301946185	-0.265322712	-0.223213218	0.462083086	-0.933535639	-1.460977052	-1.591873889	-1.105318189	-0.872103029	-0.767246816	-0.704730028	-1.501786817
GRMZM2G441144	0.35105981	0.579132162	-1.105318189	0.424507616	0.462083086	0.265322712	-1.021399468	0.174575701	-0.500322766	1.726602201	0.153863466	2.171527717	0.286550499	-0.872103029	0.508057465	-0.126347925	0.892205847	-1.902810954	1.616536998	-0.133217035	-0.09208509	-1.068431117	-1.726602201	0.223213218	0.500322766	-0.823319923	-1.130769373	1.642224543	-0.954809756	1.184000049	0.882109877	0.785662535	0.43197323	-2.998020796	0.085246759	1.545263217	-0.776421761	0.446977502	-0.933535639	0.976525035	-0.678771572	-0.842592259	1.946202375	0.571095686	-0.687372812	1.33442315	0.628171949	0.704730028	0.492617885
GRMZM2G104246	0.462083086	0.842592259	-0.862182757	1.105318189	-0.563095926	0.307908216	0.571095686	-0.611662814	-1.523165155	-0.237202109	-0.823319923	0.785662535	0.244213829	0.767246816	-1.825439172	-0.085246759	-0.244213829	0.882109877	-0.804348643	0.965610478	0.704730028	1.143773961	-0.51582268	-0.785662535	0.112627241	-1.130769373	0.484942137	-0.813797671	1.697120332	-0.387522319	0.293654744	-0.358313528	-0.057930049	-0.017029548	0.619896262	0.417065588	0.923055543	0.037471962	0.286550499	1.068431117	0.45451733	-1.117953259	-1.616536998	-2.171527717	0.823319923	-1.009990169	0.251237576	-1.156974916	0.678771572
GRMZM2G028813	-0.477294855	-2.171527717	0.523619123	0.571095686	-0.105775004	-0.417065588	-0.670220259	-1.422465003	-2.345104662	-0.882109877	-1.301946185	-0.365586148	-1.255660378	-0.230202032	-0.628171949	-0.51582268	-0.83291742	-0.804348643	0.965610478	0.300773842	-1.669043821	-0.424507616	-0.696025208	-1.48107362	0.286550499	-1.021399468	-0.223213218	-1.501786817	-0.380190046	0.010217413	0.531447525	-0.003405752	0.237202109	-0.140092436	-0.523619123	0.146974467	-0.293654744	0.112627241	0.140092436	1.105318189	1.184000049	0.315058297	-0.446977502	0.417065588	0.195363108	1.130769373	0.823319923	-0.862182757	0.167663737
GRMZM2G139714	1.032943298	0.300773842	0.010217413	-0.380190046	-0.91267586	0.223213218	0.417065588	-1.184000049	1.318010897	-0.670220259	-0.322224522	0.6448541	0.237202109	-1.757666049	-0.146974467	-1.318010897	0.776421761	0.862182757	-0.547203211	1.270787244	-1.993601218	-1.422465003	0.439462999	-0.987557182	-0.776421761	-1.790524917	0.402250065	-0.555132042	0.146974467	0.387522319	0.539308633	0.409646587	0.188425032	-1.403975696	-1.33442315	0.112627241	0.195363108	-1.862731867	-0.611662814	1.591873889	-1.068431117	0.279460686	-1.351202935	-0.902393588	-0.167663737	0.265322712	0.251237576	0.987557182	-1.568142731
GRMZM2G141150	0.776421761	-2.998020796	0.603470624	0.439462999	1.197842699	-2.645701413	-0.424507616	-0.469675385	-2.345104662	-2.249880663	-0.098927729	-2.171527717	0.670220259	-0.409646587	-2.104600628	0.216235289	0.272384894	0.933535639	-2.045954276	0.74010031	0.892205847	0.758136008	-0.202310601	0.057930049	1.33442315	1.697120332	1.568142731	-0.237202109	-1.946202375	-0.619896262	-1.902810954	-0.492617885	-0.653262666	-1.790524917	-0.160759774	1.044626445	-0.044289159	1.105318189	-0.030656506	0.965610478	0.300773842	0.286550499	-0.51582268	0.153863466	-0.579132162	0.188425032	0.126347925	1.156974916	-0.140092436
GRMZM2G305048	-1.080563549	-0.417065588	-0.078412413	-0.872103029	-0.611662814	-0.272384894	0.365586148	-0.603470624	1.568142731	-0.933535639	-1.240815502	1.545263217	-0.112627241	-1.642224543	0.731172307	0.336607179	-0.071581727	-1.523165155	0.343824517	-0.023842473	-0.965610478	-0.696025208	2.998020796	-0.258273739	1.523165155	-1.170380633	-1.056453949	-0.286550499	1.286210621	0.965610478	-1.993601218	-1.460977052	0.265322712	-1.946202375	-0.017029548	-0.336607179	-1.255660378	0.51582268	-0.670220259	0.785662535	-1.825439172	-0.469675385	-0.293654744	-1.226239142	1.197842699	1.48107362	0.251237576	-0.202310601	0.6448541
GRMZM2G070555	0.492617885	0.167663737	0.508057465	0.286550499	1.422465003	0.365586148	-1.130769373	-0.417065588	0.223213218	1.48107362	-0.892205847	1.143773961	2.249880663	-0.794970891	-1.240815502	-1.255660378	0.394875486	0.587206217	-0.078412413	0.329407333	-0.153863466	-0.336607179	-0.776421761	-0.6448541	-0.160759774	-1.616536998	0.563095926	0.653262666	1.226239142	1.197842699	1.33442315	0.661717677	1.032943298	-0.167663737	-0.188425032	0.555132042	-0.105775004	-1.591873889	0.051108415	1.184000049	-0.944119285	-0.003405752	0.776421761	-1.056453949	0.010217413	-0.09208509	-2.249880663	-1.044626445	-0.83291742
GRMZM2G090432	1.441453795	1.33442315	1.240815502	-0.477294855	0.976525035	0.439462999	1.044626445	0.365586148	2.998020796	1.156974916	0.43197323	-0.279460686	0.329407333	-0.402250065	1.862731867	0.105775004	-0.237202109	0.813797671	-1.368372038	-1.184000049	0.112627241	0.244213829	0.279460686	0.842592259	0.678771572	0.057930049	-0.153863466	0.892205847	1.117953259	1.946202375	-0.892205847	-0.085246759	-0.462083086	-0.758136008	-0.064754379	-1.825439172	-1.422465003	-0.307908216	-1.080563549	2.345104662	-1.032943298	-1.143773961	-0.603470624	0.085246759	0.500322766	1.056453949	-0.547203211	-1.568142731	-0.160759774
GRMZM2G167156	1.862731867	1.591873889	-0.387522319	0.722302208	-0.539308633	1.044626445	-0.965610478	-0.628171949	-1.270787244	-0.998710851	-0.872103029	1.351202935	1.642224543	-0.661717677	1.669043821	1.902810954	0.51582268	-0.402250065	0.923055543	-0.272384894	-1.056453949	1.032943298	1.946202375	0.794970891	2.249880663	-0.7490877	0.064754379	1.240815502	-0.010217413	0.300773842	0.74010031	0.372878156	-0.286550499	-0.6448541	-0.336607179	-0.315058297	-0.105775004	-0.380190046	1.568142731	0.322224522	-1.080563549	-0.237202109	-0.023842473	0.776421761	0.595318735	-0.265322712	-1.117953259	-0.003405752	0.892205847
GRMZM5G881961	1.184000049	-0.731172307	-0.105775004	-0.293654744	0.098927729	0.628171949	-0.133217035	0.133217035	0.587206217	0.722302208	0.402250065	1.757666049	-0.071581727	-0.678771572	-0.322224522	0.146974467	0.044289159	-0.146974467	-0.842592259	-0.628171949	-0.216235289	-0.563095926	0.037471962	1.130769373	0.91267586	-0.823319923	-2.645701413	-2.468001988	-0.160759774	0.462083086	0.882109877	-2.345104662	-0.358313528	-0.998710851	0.794970891	0.508057465	-0.882109877	0.237202109	-0.6448541	1.117953259	-0.051108415	-0.767246816	0.126347925	-0.531447525	0.944119285	0.563095926	-2.171527717	-1.226239142	-1.211918765
GRMZM2G057522	1.591873889	-0.265322712	-0.202310601	0.74010031	0.83291742	0.998710851	-0.902393588	-1.021399468	-1.616536998	1.568142731	0.174575701	1.092857156	0.731172307	0.704730028	-0.051108415	1.117953259	1.255660378	-0.003405752	-1.568142731	0.555132042	-0.619896262	1.757666049	-1.226239142	1.240815502	-2.171527717	-0.785662535	0.619896262	-0.394875486	-0.307908216	0.477294855	0.380190046	0.852346618	-0.343824517	-0.862182757	0.933535639	0.030656506	-0.174575701	-1.068431117	-0.823319923	0.794970891	0.119484771	0.587206217	-0.813797671	-0.611662814	0.064754379	0.687372812	-0.539308633	-0.286550499	0.365586148
GRMZM2G120539	0.469675385	0.500322766	-1.523165155	0.064754379	-1.092857156	-1.021399468	1.697120332	-1.170380633	1.240815502	-0.017029548	-0.91267586	0.35105981	2.998020796	-0.098927729	-0.010217413	0.322224522	-1.48107362	-1.902810954	-1.946202375	-0.372878156	-0.6448541	-1.286210621	-0.508057465	0.160759774	0.587206217	-0.424507616	-0.336607179	1.902810954	0.767246816	0.293654744	-1.056453949	-0.307908216	1.545263217	-0.976525035	0.842592259	0.307908216	-0.343824517	0.477294855	0.785662535	0.181496015	-2.249880663	-0.882109877	0.7490877	1.197842699	2.171527717	1.501786817	-0.823319923	0.579132162	1.441453795
GRMZM2G097229	1.105318189	0.119484771	0.365586148	-0.555132042	2.045954276	0.394875486	-0.902393588	-0.704730028	2.998020796	-0.687372812	0.153863466	0.230202032	-0.923055543	-0.336607179	0.923055543	-0.713488578	1.441453795	1.080563549	-0.722302208	0.758136008	0.563095926	-0.358313528	0.933535639	0.167663737	0.188425032	0.469675385	0.237202109	1.33442315	2.249880663	-0.372878156	-0.628171949	-0.619896262	-0.030656506	-0.044289159	0.51582268	1.790524917	-1.211918765	-0.776421761	-1.441453795	0.976525035	-0.216235289	-1.117953259	0.071581727	0.43197323	0.508057465	-0.603470624	-1.523165155	-0.563095926	0.603470624
GRMZM2G114550	0.842592259	-0.265322712	0.785662535	0.523619123	0.272384894	0.044289159	0.469675385	-0.619896262	-2.998020796	0.678771572	0.037471962	1.385954264	-0.439462999	-0.523619123	-0.713488578	-0.057930049	0.209267873	-0.181496015	-2.468001988	0.300773842	-2.345104662	0.43197323	-0.882109877	-0.813797671	-0.202310601	0.057930049	0.636490883	-2.249880663	0.462083086	-0.188425032	-0.823319923	-0.336607179	0.105775004	-2.171527717	-2.104600628	1.092857156	0.731172307	-0.902393588	-0.603470624	1.301946185	1.368372038	0.987557182	2.468001988	-2.045954276	0.976525035	1.156974916	0.030656506	-1.993601218	0.424507616
GRMZM2G434252	0.7490877	1.009990169	-2.998020796	0.6448541	1.130769373	0.209267873	0.188425032	0.571095686	0.35105981	1.068431117	0.852346618	-1.255660378	-0.619896262	0.237202109	0.500322766	-0.315058297	0.071581727	0.010217413	2.645701413	0.126347925	-0.579132162	-2.645701413	0.563095926	0.74010031	0.767246816	0.954809756	1.044626445	-0.776421761	-2.468001988	-0.722302208	-1.184000049	-0.965610478	-0.6448541	-0.954809756	0.83291742	1.021399468	0.794970891	0.044289159	1.211918765	-0.372878156	-0.653262666	0.181496015	-0.365586148	-0.713488578	-0.195363108	-1.032943298	0.713488578	-0.010217413	0.653262666
GRMZM2G036288	-0.628171949	-0.804348643	1.286210621	-1.056453949	-0.987557182	-1.301946185	-1.616536998	-0.852346618	0.078412413	0.286550499	0.731172307	-1.080563549	2.998020796	-0.933535639	-1.403975696	0.051108415	-0.244213829	-2.998020796	1.48107362	-0.51582268	-0.813797671	-0.030656506	1.009990169	-0.195363108	-1.270787244	-0.315058297	1.255660378	1.697120332	0.146974467	0.852346618	0.954809756	1.757666049	0.45451733	-0.704730028	-0.35105981	0.628171949	-0.611662814	2.249880663	0.446977502	1.270787244	-0.209267873	0.174575701	-2.645701413	1.568142731	-0.365586148	0.965610478	-0.882109877	0.571095686	0.83291742
GRMZM2G457415	1.270787244	0.174575701	0.636490883	0.439462999	2.171527717	2.345104662	0.462083086	0.365586148	-2.468001988	1.286210621	0.402250065	-0.188425032	-0.424507616	1.117953259	-0.492617885	0.098927729	1.032943298	0.105775004	0.09208509	1.068431117	-0.023842473	2.468001988	-1.825439172	1.33442315	1.080563549	0.380190046	0.563095926	-0.91267586	0.160759774	-0.696025208	0.030656506	1.48107362	0.446977502	-0.862182757	1.825439172	1.403975696	0.265322712	-0.767246816	-0.944119285	0.202310601	-0.133217035	-0.595318735	-1.211918765	-1.48107362	0.085246759	-0.244213829	-0.872103029	-0.687372812	-1.240815502
GRMZM2G054304	-0.83291742	1.545263217	0.923055543	-0.571095686	0.085246759	-0.237202109	2.171527717	-0.424507616	-0.223213218	0.842592259	-0.307908216	1.946202375	0.902393588	0.078412413	-2.645701413	0.387522319	-0.272384894	1.032943298	0.181496015	1.143773961	1.993601218	-0.09208509	-0.160759774	0.153863466	-0.862182757	0.174575701	0.09208509	1.286210621	-0.687372812	-0.767246816	-2.345104662	-0.852346618	0.279460686	-2.104600628	1.068431117	0.7490877	0.722302208	-0.358313528	-0.987557182	-0.023842473	-0.286550499	1.156974916	-1.993601218	-0.731172307	-0.336607179	1.403975696	-0.140092436	-0.670220259	2.345104662
GRMZM2G110509	0.628171949	0.579132162	1.385954264	0.813797671	-0.112627241	-0.133217035	0.804348643	-0.492617885	0.188425032	0.003405752	0.794970891	0.160759774	1.351202935	0.687372812	0.539308633	0.852346618	0.181496015	-0.731172307	-0.064754379	-0.758136008	-0.987557182	-0.322224522	1.993601218	0.862182757	0.91267586	0.044289159	-0.611662814	0.424507616	0.030656506	0.965610478	1.33442315	1.48107362	0.661717677	-1.523165155	-0.394875486	-0.119484771	0.216235289	0.230202032	-1.385954264	0.329407333	-0.563095926	0.872103029	-0.823319923	-1.226239142	-0.251237576	0.923055543	0.358313528	-0.539308633	-0.078412413
GRMZM5G860241	1.545263217	0.776421761	-2.998020796	1.092857156	1.021399468	-0.358313528	-2.645701413	-2.468001988	-0.272384894	1.726602201	-2.345104662	-2.249880663	-0.230202032	-0.462083086	1.385954264	-2.104600628	0.696025208	0.987557182	1.946202375	-2.045954276	-1.993601218	-1.946202375	1.441453795	0.794970891	-0.336607179	0.358313528	-0.523619123	-1.862731867	0.595318735	0.279460686	0.140092436	0.078412413	0.424507616	-0.112627241	-1.825439172	-1.790524917	0.619896262	0.230202032	2.249880663	1.48107362	1.130769373	-1.757666049	0.43197323	0.343824517	0.469675385	2.345104662	-0.167663737	0.813797671	-0.547203211
GRMZM2G074946	0.670220259	1.523165155	0.603470624	-0.051108415	1.255660378	0.380190046	0.09208509	-1.591873889	0.923055543	-1.697120332	-0.216235289	0.057930049	-0.794970891	-0.336607179	-1.092857156	-1.117953259	0.500322766	0.343824517	0.300773842	0.862182757	0.372878156	0.358313528	-0.500322766	-1.032943298	-0.653262666	-0.167663737	0.237202109	0.785662535	1.902810954	0.794970891	2.345104662	-0.098927729	0.776421761	0.45451733	0.539308633	-0.223213218	-1.143773961	-0.174575701	-0.188425032	0.944119285	-0.670220259	-1.105318189	-0.409646587	1.568142731	-0.230202032	-0.91267586	0.446977502	0.140092436	0.315058297
GRMZM2G459172	-1.422465003	-0.611662814	-0.329407333	0.424507616	-0.579132162	-0.923055543	-1.211918765	0.74010031	-0.417065588	1.255660378	0.237202109	0.7490877	-1.993601218	-0.852346618	0.394875486	0.258273739	-1.255660378	-1.197842699	-0.902393588	-0.112627241	1.184000049	-1.669043821	-0.882109877	1.143773961	0.265322712	-1.523165155	0.933535639	-0.017029548	1.021399468	1.044626445	1.825439172	0.126347925	0.611662814	1.080563549	-1.568142731	0.500322766	-1.862731867	0.539308633	-0.933535639	-0.119484771	-0.83291742	-0.402250065	0.293654744	0.251237576	0.813797671	1.211918765	0.804348643	-0.307908216	-0.140092436
AC208860.3_FG002	0.872103029	-0.579132162	-0.670220259	0.195363108	0.804348643	2.104600628	1.117953259	0.933535639	-1.080563549	1.545263217	-0.387522319	0.678771572	-0.394875486	-0.492617885	-0.030656506	-0.010217413	1.616536998	0.230202032	0.300773842	-0.713488578	-0.300773842	0.539308633	0.998710851	-0.477294855	-0.044289159	-0.126347925	-2.468001988	0.417065588	-2.345104662	0.823319923	-0.852346618	-0.037471962	-0.571095686	-2.249880663	0.209267873	0.6448541	0.587206217	1.032943298	0.469675385	1.825439172	-0.237202109	0.508057465	0.402250065	-0.365586148	-0.74010031	0.813797671	0.523619123	0.003405752	0.571095686
GRMZM2G108284	0.731172307	-1.669043821	0.882109877	-0.223213218	0.017029548	-0.105775004	1.301946185	-0.329407333	-1.080563549	-0.424507616	0.954809756	2.171527717	0.315058297	0.43197323	-0.09208509	1.032943298	-0.160759774	0.722302208	0.409646587	0.051108415	-0.098927729	-1.117953259	-0.804348643	0.064754379	1.902810954	0.037471962	0.078412413	-0.071581727	2.104600628	0.380190046	-0.394875486	0.678771572	-0.372878156	-0.477294855	-0.188425032	-0.976525035	1.021399468	0.300773842	0.237202109	-0.167663737	-1.184000049	0.174575701	2.645701413	-1.170380633	0.030656506	0.587206217	-1.385954264	-0.539308633	-0.987557182
GRMZM5G873594	-0.484942137	-0.563095926	0.83291742	0.279460686	-0.195363108	0.998710851	1.211918765	-0.307908216	-2.468001988	0.653262666	-0.872103029	0.976525035	-0.160759774	-1.056453949	-0.91267586	-0.315058297	1.545263217	2.468001988	-1.501786817	-0.037471962	0.098927729	-0.343824517	-1.825439172	-0.153863466	-0.417065588	1.170380633	0.661717677	-0.776421761	0.119484771	0.387522319	1.501786817	1.105318189	-0.174575701	-1.790524917	0.044289159	1.48107362	0.417065588	-0.085246759	-0.508057465	-0.146974467	-0.365586148	0.216235289	-0.409646587	-1.403975696	0.315058297	0.678771572	-1.170380633	-0.181496015	-0.35105981
GRMZM2G131623	2.104600628	0.892205847	-0.469675385	0.758136008	1.825439172	1.368372038	0.322224522	-1.009990169	-2.645701413	0.933535639	1.403975696	2.645701413	1.044626445	-1.080563549	0.670220259	-0.446977502	0.531447525	0.35105981	-0.987557182	0.315058297	-0.174575701	0.74010031	-2.045954276	1.301946185	1.105318189	0.174575701	-1.726602201	-0.794970891	-1.403975696	-1.568142731	-0.51582268	-1.044626445	-0.91267586	0.523619123	-0.823319923	0.133217035	-2.104600628	-1.117953259	0.91267586	-0.785662535	-0.43197323	0.003405752	-1.591873889	-0.954809756	-1.226239142	0.146974467	-0.508057465	0.409646587	-0.343824517
GRMZM2G016106	-0.587206217	0.882109877	-0.394875486	-0.402250065	-0.492617885	-0.547203211	-0.003405752	-1.226239142	-2.998020796	0.146974467	-1.460977052	0.265322712	-0.713488578	-0.7490877	-0.670220259	-2.104600628	1.156974916	0.670220259	0.477294855	0.167663737	0.547203211	0.424507616	-1.156974916	-2.345104662	0.696025208	0.174575701	-1.403975696	0.531447525	-0.531447525	-0.209267873	1.286210621	-0.272384894	-0.300773842	1.902810954	-0.91267586	0.965610478	-0.439462999	-0.372878156	1.33442315	-1.825439172	0.462083086	0.160759774	0.653262666	-0.112627241	-0.023842473	-0.146974467	-0.823319923	-0.51582268	0.223213218
GRMZM2G102714	-2.249880663	0.776421761	-1.902810954	-0.409646587	-1.862731867	-0.713488578	1.255660378	-0.933535639	-1.301946185	0.286550499	0.037471962	1.143773961	1.211918765	-1.523165155	-1.240815502	-0.469675385	-0.842592259	-0.071581727	0.484942137	-0.417065588	0.167663737	-0.43197323	0.336607179	0.293654744	2.998020796	-0.611662814	-0.003405752	1.286210621	0.670220259	1.568142731	1.117953259	0.43197323	1.226239142	0.230202032	-0.892205847	-1.226239142	-1.545263217	0.785662535	1.240815502	0.933535639	-1.286210621	1.460977052	2.645701413	-0.307908216	1.368372038	1.422465003	1.862731867	1.044626445	-1.184000049
GRMZM2G129987	1.056453949	-0.424507616	-0.571095686	0.174575701	0.140092436	1.117953259	-0.237202109	-1.501786817	-2.104600628	-0.343824517	-0.687372812	-0.523619123	0.146974467	0.74010031	-1.044626445	-0.365586148	2.171527717	0.611662814	-1.117953259	1.318010897	-1.092857156	0.078412413	-1.993601218	-0.112627241	1.460977052	-0.181496015	0.265322712	-1.068431117	0.380190046	-0.402250065	0.251237576	1.825439172	0.902393588	-1.403975696	0.258273739	0.862182757	0.767246816	0.279460686	-0.678771572	0.794970891	-1.197842699	-0.09208509	0.424507616	-0.872103029	1.211918765	0.167663737	0.563095926	0.976525035	1.568142731
GRMZM2G161969	0.279460686	0.653262666	-0.037471962	-0.126347925	0.469675385	0.409646587	0.987557182	0.51582268	-2.998020796	0.209267873	0.098927729	-0.767246816	0.892205847	0.105775004	-1.092857156	-0.628171949	1.757666049	0.954809756	0.477294855	0.670220259	-0.272384894	1.385954264	-1.460977052	-0.064754379	0.051108415	-0.003405752	-0.300773842	-1.441453795	-0.146974467	0.579132162	1.697120332	0.500322766	1.368372038	-0.237202109	0.300773842	0.160759774	1.825439172	1.105318189	0.628171949	0.965610478	0.547203211	0.417065588	-1.184000049	-0.181496015	-0.078412413	1.117953259	0.017029548	0.307908216	-0.794970891
GRMZM2G326643	1.523165155	-0.146974467	-0.469675385	1.226239142	1.056453949	1.032943298	-0.477294855	0.223213218	-2.645701413	1.156974916	-0.112627241	0.603470624	0.492617885	0.272384894	-0.133217035	1.286210621	0.661717677	0.43197323	-1.044626445	0.670220259	-0.174575701	1.757666049	-1.902810954	1.143773961	-0.670220259	0.202310601	0.085246759	-1.790524917	-0.571095686	-1.068431117	-0.713488578	0.258273739	-0.696025208	-1.156974916	1.351202935	0.237202109	1.080563549	-1.143773961	0.098927729	0.336607179	0.45451733	-0.329407333	-1.422465003	-0.965610478	-0.300773842	-0.037471962	-0.842592259	-0.307908216	-1.255660378
GRMZM2G061672	-0.365586148	-0.523619123	-0.842592259	0.209267873	-0.713488578	0.365586148	0.492617885	-0.387522319	-1.105318189	0.402250065	-0.279460686	0.237202109	0.023842473	0.758136008	-1.080563549	-0.687372812	0.653262666	0.223213218	2.345104662	-1.501786817	-0.181496015	0.244213829	1.48107362	-0.258273739	-0.813797671	-0.044289159	0.329407333	1.33442315	-0.696025208	1.226239142	1.993601218	1.460977052	0.804348643	0.704730028	-0.358313528	-0.987557182	-0.722302208	-2.045954276	-0.872103029	0.394875486	-0.409646587	-0.954809756	-0.071581727	0.595318735	-0.010217413	-0.785662535	0.286550499	-0.862182757	1.117953259
GRMZM2G128012	1.385954264	-0.492617885	0.619896262	-0.244213829	0.202310601	0.51582268	0.174575701	-1.368372038	-1.642224543	0.380190046	-0.678771572	1.318010897	-1.117953259	-1.184000049	0.010217413	-0.112627241	0.713488578	1.726602201	-0.167663737	0.976525035	-1.568142731	-0.35105981	-0.126347925	-0.003405752	0.237202109	-0.998710851	0.044289159	0.293654744	0.417065588	0.35105981	0.91267586	0.758136008	0.500322766	-0.628171949	-0.286550499	-0.394875486	-0.365586148	0.286550499	-1.825439172	1.422465003	-0.181496015	-0.6448541	-2.104600628	-1.318010897	-0.923055543	0.813797671	0.037471962	-0.300773842	0.653262666
GRMZM2G105229	0.051108415	-1.301946185	-1.080563549	0.322224522	-0.153863466	0.017029548	0.237202109	-0.492617885	-2.645701413	0.523619123	-0.209267873	0.944119285	1.523165155	-0.358313528	-0.387522319	-1.021399468	0.998710851	0.343824517	0.804348643	0.767246816	-1.197842699	-1.460977052	-1.545263217	-0.547203211	0.105775004	-0.188425032	-1.523165155	0.469675385	-0.976525035	1.105318189	1.669043821	0.531447525	0.446977502	-1.044626445	-0.804348643	1.032943298	0.244213829	-0.023842473	-1.226239142	2.249880663	-1.726602201	0.933535639	-0.619896262	-1.790524917	-0.030656506	1.226239142	-1.368372038	-0.244213829	0.462083086
GRMZM2G146028	-0.272384894	0.862182757	-1.143773961	0.160759774	1.270787244	0.539308633	1.156974916	-0.402250065	1.460977052	0.446977502	-0.209267873	1.790524917	1.184000049	0.547203211	-1.790524917	-0.794970891	0.628171949	-1.385954264	-1.591873889	-0.030656506	-0.322224522	-0.523619123	0.687372812	0.492617885	0.051108415	-0.731172307	-1.068431117	-0.409646587	1.403975696	0.670220259	0.057930049	-0.670220259	0.45451733	-1.301946185	-0.704730028	-1.092857156	-1.48107362	-0.105775004	0.133217035	-0.188425032	-0.595318735	-2.249880663	0.119484771	-0.085246759	0.394875486	-0.064754379	-2.645701413	0.216235289	1.726602201
GRMZM2G463415	1.591873889	-0.133217035	-0.563095926	1.156974916	-0.611662814	-0.462083086	-0.571095686	-1.156974916	-0.09208509	-0.265322712	-0.017029548	2.645701413	1.197842699	-1.286210621	-0.722302208	-0.678771572	0.758136008	0.804348643	1.044626445	1.790524917	-1.33442315	-1.197842699	-0.258273739	0.713488578	2.345104662	-0.758136008	-0.181496015	-0.300773842	0.976525035	-0.251237576	-1.862731867	0.09208509	-0.202310601	0.823319923	0.372878156	1.568142731	-0.74010031	-1.757666049	0.409646587	2.045954276	-0.492617885	-0.628171949	-0.105775004	0.336607179	0.83291742	1.301946185	0.439462999	0.892205847	-0.923055543
GRMZM2G103873	0.300773842	0.696025208	-0.057930049	-0.230202032	1.422465003	0.987557182	0.661717677	0.704730028	2.998020796	1.092857156	0.603470624	1.368372038	1.790524917	0.595318735	-0.852346618	-1.056453949	-0.286550499	1.255660378	1.902810954	0.91267586	1.460977052	-0.279460686	0.146974467	-1.240815502	1.862731867	0.555132042	-1.021399468	1.523165155	0.892205847	-0.902393588	1.757666049	0.998710851	-0.010217413	-0.153863466	0.380190046	1.642224543	-0.500322766	0.477294855	-0.619896262	-0.119484771	-0.293654744	0.098927729	1.351202935	0.670220259	0.636490883	-0.51582268	-1.156974916	-1.211918765	1.044626445
GRMZM2G127499	1.092857156	-2.998020796	0.209267873	1.286210621	0.140092436	-2.645701413	0.678771572	-2.468001988	-2.249880663	0.555132042	-0.195363108	-2.171527717	0.167663737	0.842592259	-0.133217035	0.146974467	1.726602201	1.211918765	-2.104600628	0.862182757	-2.045954276	-1.993601218	0.126347925	1.009990169	0.272384894	-0.078412413	0.188425032	-1.902810954	-1.862731867	-1.825439172	-1.790524917	-1.757666049	0.439462999	-0.017029548	-1.669043821	-1.642224543	0.492617885	0.579132162	1.021399468	-0.112627241	0.237202109	0.628171949	0.085246759	-1.591873889	-1.568142731	0.380190046	0.336607179	-0.251237576	1.130769373
GRMZM2G013524	-0.653262666	0.579132162	-0.112627241	0.167663737	-0.098927729	1.009990169	0.628171949	0.051108415	-2.998020796	-0.244213829	-2.645701413	-0.555132042	1.351202935	0.43197323	-0.265322712	0.469675385	0.804348643	0.965610478	-2.468001988	-2.345104662	1.385954264	-2.249880663	0.563095926	-2.171527717	-0.174575701	-2.104600628	-0.547203211	-2.045954276	0.133217035	0.258273739	0.35105981	0.372878156	0.017029548	0.91267586	1.368372038	-0.387522319	0.653262666	0.439462999	1.757666049	0.492617885	0.933535639	-0.044289159	1.642224543	-1.946202375	1.993601218	1.862731867	-0.017029548	1.697120332	-1.902810954
GRMZM2G016457	0.571095686	-0.74010031	-0.272384894	1.422465003	0.286550499	-0.057930049	-0.237202109	-1.757666049	-2.998020796	0.237202109	-1.056453949	0.965610478	0.202310601	-0.153863466	0.167663737	0.293654744	1.33442315	1.068431117	1.403975696	0.188425032	-1.301946185	-1.130769373	-1.993601218	-0.402250065	-0.329407333	-1.616536998	-0.661717677	1.092857156	0.387522319	1.523165155	2.045954276	1.501786817	1.946202375	1.130769373	-0.258273739	-0.307908216	-0.098927729	-0.424507616	-0.823319923	-0.064754379	-0.531447525	-0.343824517	-0.902393588	-1.080563549	-0.365586148	1.385954264	-0.923055543	-0.587206217	-0.508057465
GRMZM2G087275	-0.872103029	0.085246759	0.037471962	-0.343824517	-0.555132042	-0.862182757	0.823319923	-0.477294855	-2.345104662	0.017029548	-1.441453795	1.211918765	1.568142731	-0.687372812	-0.653262666	-0.628171949	-0.230202032	-0.508057465	-0.74010031	0.315058297	0.146974467	-1.33442315	-0.636490883	-1.130769373	1.301946185	-1.184000049	-0.272384894	0.678771572	1.946202375	1.726602201	2.468001988	-0.424507616	1.032943298	-1.021399468	0.230202032	1.642224543	1.068431117	1.197842699	0.7490877	0.286550499	-0.902393588	-0.882109877	-0.43197323	-0.794970891	0.954809756	0.83291742	0.469675385	0.140092436	0.636490883
GRMZM2G053557	0.722302208	-0.409646587	0.085246759	-0.603470624	0.279460686	0.7490877	0.293654744	-0.776421761	-2.645701413	0.539308633	0.051108415	1.790524917	-0.439462999	0.976525035	-1.080563549	-0.329407333	0.954809756	1.130769373	1.993601218	0.417065588	-0.500322766	-1.130769373	-0.258273739	-0.343824517	-0.587206217	-1.092857156	0.477294855	1.441453795	0.794970891	-2.104600628	-1.422465003	0.372878156	0.365586148	-0.272384894	0.965610478	0.892205847	-1.697120332	0.776421761	-1.009990169	0.813797671	-0.823319923	-1.460977052	1.616536998	0.394875486	-0.017029548	-0.071581727	-1.197842699	-0.146974467	0.188425032
GRMZM5G873581	0.35105981	0.188425032	-1.105318189	0.216235289	1.211918765	0.293654744	-0.446977502	0.265322712	1.009990169	1.270787244	0.563095926	0.45451733	-0.539308633	-1.591873889	-0.469675385	0.987557182	1.092857156	0.251237576	0.365586148	1.862731867	-0.394875486	1.197842699	-0.944119285	2.045954276	0.402250065	0.010217413	-0.265322712	0.976525035	0.653262666	-0.237202109	0.181496015	-1.318010897	-1.211918765	0.555132042	-1.368372038	0.91267586	0.758136008	0.160759774	-1.790524917	-0.258273739	-0.653262666	-1.545263217	-0.6448541	-0.43197323	0.051108415	-1.117953259	0.51582268	0.167663737	-0.579132162
GRMZM2G154156	-0.315058297	-0.446977502	0.45451733	0.160759774	-0.954809756	-0.402250065	-0.140092436	-0.531447525	-2.045954276	1.021399468	0.823319923	0.078412413	-0.195363108	-1.270787244	0.43197323	-0.322224522	-1.545263217	-0.417065588	-0.842592259	-0.037471962	1.318010897	1.501786817	0.804348643	2.104600628	-1.197842699	1.092857156	-1.130769373	-0.202310601	0.508057465	0.539308633	0.628171949	-0.923055543	0.153863466	0.469675385	1.032943298	0.74010031	-0.687372812	1.616536998	-0.265322712	1.385954264	-0.611662814	-1.726602201	0.776421761	1.211918765	1.545263217	-0.098927729	-0.6448541	0.83291742	-1.33442315
GRMZM2G124557	2.249880663	-1.946202375	0.484942137	0.251237576	1.697120332	-0.244213829	-0.933535639	0.286550499	-0.813797671	0.670220259	0.300773842	-0.484942137	1.197842699	-1.422465003	0.477294855	0.547203211	0.167663737	-0.804348643	-0.508057465	0.7490877	-1.501786817	-1.211918765	0.037471962	0.336607179	-1.669043821	-0.216235289	-0.071581727	-1.170380633	-1.117953259	-0.628171949	-0.563095926	0.160759774	-1.105318189	-1.092857156	1.032943298	-0.343824517	-0.43197323	-0.279460686	-0.336607179	1.825439172	-0.862182757	-0.539308633	-1.697120332	-1.825439172	0.469675385	0.758136008	-1.301946185	-0.160759774	-0.174575701
GRMZM2G300786	-0.619896262	-0.508057465	0.531447525	0.119484771	1.021399468	2.345104662	1.422465003	-0.842592259	2.998020796	-1.862731867	0.085246759	-1.33442315	-0.998710851	0.976525035	1.403975696	-0.017029548	1.902810954	0.09208509	1.385954264	-0.6448541	0.153863466	0.767246816	0.030656506	0.587206217	1.591873889	0.539308633	-0.813797671	-1.422465003	1.170380633	0.365586148	-0.230202032	0.547203211	-0.595318735	-0.892205847	-0.336607179	0.358313528	-0.603470624	0.722302208	-0.696025208	0.933535639	0.071581727	-1.616536998	-1.092857156	-2.045954276	0.223213218	-0.531447525	-0.251237576	-0.767246816	-0.758136008
GRMZM2G472643	0.6448541	1.156974916	-0.619896262	-0.293654744	-1.255660378	-1.044626445	0.83291742	-1.902810954	1.184000049	-1.501786817	-0.587206217	0.202310601	2.645701413	-1.092857156	1.056453949	1.757666049	-0.998710851	-0.539308633	1.197842699	-0.500322766	-0.085246759	-1.286210621	-0.037471962	-1.523165155	0.508057465	-1.117953259	-0.394875486	0.776421761	0.696025208	0.017029548	-0.91267586	-0.555132042	0.044289159	-2.104600628	0.954809756	-0.722302208	-0.523619123	0.003405752	1.009990169	0.767246816	-0.595318735	-0.119484771	0.976525035	0.394875486	2.045954276	0.230202032	-0.687372812	-0.508057465	-0.469675385
GRMZM2G142825	1.523165155	-0.188425032	-0.767246816	0.417065588	1.130769373	0.119484771	-0.358313528	-0.469675385	-2.998020796	1.862731867	0.358313528	0.872103029	-0.258273739	0.017029548	-1.056453949	-0.216235289	1.825439172	0.587206217	-1.156974916	0.279460686	-1.642224543	0.09208509	-1.862731867	0.167663737	0.409646587	-0.265322712	0.010217413	-1.226239142	-0.315058297	0.439462999	0.146974467	0.7490877	0.776421761	-0.126347925	-0.523619123	1.255660378	0.539308633	0.051108415	-0.237202109	0.112627241	-0.571095686	-0.307908216	0.293654744	0.202310601	-0.336607179	0.484942137	0.45451733	-0.085246759	-0.687372812
GRMZM2G168956	0.365586148	1.568142731	0.902393588	0.852346618	0.265322712	-0.43197323	0.051108415	-0.409646587	2.104600628	-0.813797671	1.501786817	1.697120332	0.237202109	-0.477294855	0.387522319	2.249880663	-0.140092436	1.726602201	1.318010897	-0.223213218	-0.842592259	-0.439462999	1.184000049	-0.531447525	-0.202310601	-0.387522319	-0.462083086	0.547203211	-0.987557182	0.336607179	-0.872103029	-0.315058297	0.794970891	-1.545263217	0.653262666	0.216235289	0.010217413	0.813797671	1.226239142	1.993601218	-0.603470624	0.611662814	0.244213829	-2.998020796	-0.160759774	1.441453795	-2.171527717	0.09208509	-1.825439172
GRMZM2G142735	-1.197842699	-0.272384894	-0.119484771	0.167663737	-0.343824517	-0.484942137	-0.636490883	0.852346618	-2.998020796	0.424507616	-1.240815502	0.976525035	0.704730028	-1.301946185	-0.882109877	-1.946202375	0.181496015	-1.056453949	-0.258273739	-0.902393588	-1.862731867	-1.441453795	0.823319923	-1.48107362	-1.044626445	-0.315058297	-0.704730028	-0.216235289	0.307908216	0.6448541	0.343824517	0.279460686	0.628171949	-0.003405752	-0.944119285	-0.579132162	1.009990169	-0.687372812	-1.286210621	0.998710851	-0.030656506	-0.329407333	-0.872103029	-0.965610478	1.48107362	0.987557182	-0.954809756	-0.244213829	0.365586148
GRMZM5G827121	1.130769373	1.021399468	-2.998020796	-2.645701413	0.402250065	1.143773961	1.825439172	-2.468001988	-2.249880663	0.91267586	-0.126347925	-2.171527717	1.422465003	0.45451733	-2.104600628	0.09208509	1.946202375	0.424507616	-2.045954276	-1.993601218	-1.946202375	1.460977052	-1.902810954	-0.064754379	-1.862731867	-1.825439172	-0.237202109	-0.202310601	1.403975696	1.117953259	0.265322712	-1.757666049	0.944119285	-1.669043821	0.230202032	-1.642224543	0.571095686	0.037471962	-0.112627241	-0.174575701	-0.195363108	0.286550499	1.318010897	0.322224522	0.954809756	0.767246816	-0.279460686	0.531447525	2.104600628
GRMZM2G127421	-1.009990169	1.105318189	-0.105775004	1.48107362	-1.993601218	0.160759774	1.790524917	0.446977502	0.611662814	-0.477294855	-1.021399468	-1.156974916	0.636490883	-0.146974467	-0.687372812	-0.91267586	-0.661717677	0.372878156	-0.202310601	1.068431117	-0.057930049	-0.010217413	1.255660378	-0.842592259	0.595318735	-0.446977502	0.09208509	0.181496015	0.223213218	1.117953259	0.83291742	0.237202109	0.872103029	-1.301946185	-0.954809756	-1.757666049	0.230202032	0.954809756	0.409646587	0.336607179	-1.286210621	0.258273739	1.523165155	1.301946185	0.469675385	2.249880663	0.251237576	0.078412413	0.944119285
GRMZM2G112240	0.174575701	0.286550499	-0.112627241	-0.923055543	0.713488578	1.568142731	-0.508057465	-0.315058297	-2.645701413	0.823319923	-0.35105981	0.071581727	1.056453949	0.587206217	-1.591873889	-0.402250065	1.032943298	-0.587206217	0.322224522	-0.030656506	-0.813797671	0.492617885	1.240815502	-0.251237576	1.726602201	0.293654744	0.603470624	-0.678771572	0.119484771	-0.785662535	0.484942137	1.669043821	1.33442315	0.523619123	0.133217035	1.143773961	-0.119484771	0.023842473	0.343824517	2.045954276	-1.697120332	0.160759774	-0.892205847	-0.696025208	0.146974467	0.531447525	0.202310601	-0.704730028	-0.09208509
GRMZM2G022710	-2.998020796	1.697120332	-2.645701413	-0.003405752	-2.468001988	-2.345104662	-0.098927729	-0.387522319	-2.171527717	-2.104600628	-0.469675385	-0.223213218	0.329407333	-2.045954276	0.776421761	-0.500322766	-0.051108415	-1.993601218	-1.946202375	-0.446977502	2.345104662	0.619896262	1.757666049	0.555132042	0.286550499	0.531447525	-0.017029548	0.603470624	0.188425032	0.258273739	-1.902810954	-1.862731867	0.237202109	0.767246816	0.563095926	-0.508057465	1.117953259	1.946202375	1.545263217	0.794970891	0.547203211	-0.484942137	0.91267586	1.255660378	0.713488578	-0.126347925	-1.790524917	-1.757666049	0.146974467
GRMZM2G136901	-0.661717677	0.882109877	0.286550499	-0.531447525	0.603470624	-1.130769373	1.197842699	-1.993601218	0.965610478	0.230202032	-0.611662814	1.211918765	0.216235289	-0.209267873	-0.758136008	-0.579132162	-0.603470624	-0.547203211	1.902810954	0.508057465	-0.976525035	-0.09208509	0.678771572	-0.539308633	0.892205847	-1.642224543	-1.757666049	1.130769373	0.387522319	1.790524917	2.171527717	-0.882109877	0.484942137	0.500322766	-0.424507616	-0.216235289	-0.670220259	0.300773842	-0.7490877	0.402250065	-2.345104662	-0.010217413	0.91267586	0.307908216	-0.265322712	0.343824517	-1.156974916	0.244213829	0.563095926
GRMZM2G364272	-1.318010897	-0.017029548	1.270787244	-0.976525035	-1.009990169	-0.804348643	1.993601218	-0.477294855	1.726602201	0.258273739	-1.642224543	-0.91267586	2.104600628	-1.591873889	-1.130769373	-0.09208509	-0.687372812	0.293654744	-2.998020796	-0.315058297	-1.255660378	-0.133217035	-0.547203211	-0.037471962	0.882109877	-0.83291742	0.044289159	0.767246816	0.862182757	1.044626445	-2.645701413	-0.105775004	-0.153863466	-1.092857156	-1.197842699	-0.555132042	-0.696025208	0.628171949	-0.619896262	0.43197323	-1.032943298	-1.568142731	-0.251237576	0.933535639	1.056453949	1.156974916	0.146974467	0.085246759	0.35105981
GRMZM2G163398	-0.112627241	0.923055543	-0.195363108	0.119484771	-0.119484771	-0.45451733	-0.477294855	-0.653262666	-1.669043821	1.080563549	-0.202310601	0.976525035	-0.619896262	0.105775004	-0.987557182	-2.104600628	0.628171949	0.417065588	0.661717677	-0.315058297	-2.645701413	-0.965610478	1.862731867	-1.385954264	-0.523619123	-0.595318735	0.579132162	0.555132042	-1.545263217	2.045954276	0.085246759	1.117953259	0.670220259	1.368372038	-0.670220259	-0.462083086	-0.336607179	-0.394875486	-0.661717677	0.882109877	0.078412413	-0.365586148	1.697120332	0.862182757	-0.687372812	0.216235289	0.160759774	0.336607179	-1.197842699
GRMZM2G400109	-0.380190046	0.722302208	-0.563095926	0.636490883	0.258273739	0.209267873	1.48107362	-0.965610478	2.645701413	0.563095926	0.329407333	1.044626445	0.469675385	0.119484771	-2.998020796	-0.35105981	0.195363108	-0.45451733	-2.645701413	-0.653262666	-2.468001988	-2.345104662	-0.902393588	-0.307908216	0.804348643	-0.417065588	0.023842473	1.757666049	0.603470624	-0.758136008	-0.064754379	0.813797671	1.385954264	-0.731172307	-0.477294855	-2.249880663	1.080563549	1.422465003	-2.104600628	0.965610478	-0.539308633	-2.045954276	-1.993601218	1.318010897	0.976525035	0.237202109	-0.722302208	-1.946202375	0.140092436
AC210303.3_FG001	0.954809756	-0.315058297	0.424507616	1.211918765	1.351202935	1.385954264	0.209267873	0.112627241	-2.998020796	1.825439172	0.794970891	2.998020796	0.272384894	0.251237576	0.140092436	0.477294855	1.021399468	-1.240815502	-1.616536998	1.009990169	-1.255660378	-0.010217413	-1.993601218	0.628171949	-0.293654744	-0.923055543	0.722302208	-0.902393588	-1.591873889	-0.258273739	-0.758136008	0.078412413	0.387522319	0.265322712	0.731172307	0.462083086	1.697120332	1.130769373	-1.697120332	0.417065588	0.174575701	0.003405752	-0.112627241	0.704730028	-0.071581727	-0.439462999	-1.105318189	-0.322224522	-1.422465003
AF546187.1_FG007	-0.230202032	0.181496015	0.265322712	-0.300773842	0.343824517	-0.45451733	-0.477294855	-0.603470624	-0.998710851	0.587206217	0.112627241	-0.380190046	0.286550499	0.279460686	-0.078412413	0.6448541	-0.209267873	0.167663737	-0.223213218	0.687372812	1.669043821	0.619896262	-1.021399468	-0.265322712	-1.726602201	0.500322766	0.003405752	-0.329407333	-0.933535639	-0.547203211	-0.202310601	-1.068431117	-1.523165155	1.902810954	0.611662814	0.071581727	-0.237202109	0.064754379	1.460977052	-0.417065588	1.726602201	0.998710851	-0.484942137	0.216235289	0.636490883	-1.056453949	-0.678771572	2.045954276	0.085246759
GRMZM2G005788	0.872103029	-0.023842473	0.358313528	-0.258273739	0.539308633	-0.188425032	-0.030656506	-1.726602201	1.946202375	0.469675385	-0.322224522	-0.372878156	0.595318735	0.462083086	-0.329407333	0.181496015	0.300773842	-0.842592259	0.402250065	0.126347925	-2.045954276	-0.823319923	1.48107362	0.140092436	1.993601218	-1.211918765	-0.153863466	0.7490877	0.944119285	0.153863466	-0.43197323	0.785662535	-0.237202109	1.240815502	0.394875486	-0.813797671	-0.293654744	0.804348643	-1.902810954	0.776421761	-0.933535639	-2.104600628	1.403975696	2.171527717	-0.722302208	0.230202032	0.167663737	0.216235289	0.619896262
GRMZM2G091232	-0.195363108	1.170380633	-1.460977052	1.143773961	-0.085246759	-0.902393588	0.223213218	-1.33442315	-0.587206217	-0.74010031	-1.009990169	0.030656506	0.923055543	-1.669043821	-1.523165155	-0.160759774	-0.603470624	-2.045954276	0.417065588	0.202310601	-2.998020796	-1.568142731	0.216235289	0.133217035	-0.181496015	-0.500322766	-0.146974467	1.056453949	0.244213829	0.372878156	-1.790524917	-0.237202109	1.021399468	-1.170380633	-0.987557182	0.307908216	-0.244213829	-1.368372038	1.211918765	1.642224543	-0.653262666	-0.230202032	-2.645701413	1.301946185	2.468001988	0.105775004	-1.156974916	0.439462999	0.571095686
GRMZM2G073774	0.965610478	1.351202935	0.336607179	0.547203211	0.057930049	-0.785662535	0.064754379	0.223213218	-2.998020796	0.852346618	0.954809756	-0.365586148	0.202310601	0.010217413	0.636490883	0.842592259	1.902810954	-2.645701413	0.91267586	-0.965610478	-0.91267586	-0.237202109	0.678771572	0.531447525	-0.731172307	-0.653262666	0.017029548	-0.823319923	-2.468001988	0.181496015	1.385954264	0.023842473	-0.195363108	-1.044626445	0.394875486	1.862731867	0.258273739	2.468001988	0.563095926	0.587206217	0.6448541	0.579132162	-2.345104662	-2.249880663	0.661717677	-0.167663737	-0.037471962	0.126347925	-2.171527717
GRMZM2G451031	0.872103029	0.037471962	1.092857156	-0.230202032	-0.153863466	0.678771572	0.230202032	-0.611662814	2.998020796	0.336607179	-0.794970891	0.687372812	-0.010217413	0.237202109	0.767246816	-0.74010031	0.09208509	-0.358313528	1.403975696	0.611662814	-1.403975696	-0.823319923	0.45451733	1.170380633	0.595318735	0.146974467	0.944119285	-0.258273739	0.776421761	-0.51582268	-0.523619123	0.923055543	-0.892205847	-1.009990169	-0.579132162	0.446977502	-0.160759774	-0.7490877	-1.501786817	1.460977052	-0.417065588	-1.226239142	0.051108415	-1.790524917	0.653262666	0.785662535	-0.402250065	-0.037471962	0.523619123
GRMZM2G041714	-1.080563549	0.439462999	0.523619123	-0.272384894	0.872103029	-1.545263217	0.611662814	-2.345104662	0.469675385	-0.105775004	0.571095686	0.372878156	0.343824517	-0.223213218	-1.286210621	0.628171949	-0.595318735	-0.064754379	0.286550499	0.902393588	-1.211918765	-0.417065588	-0.661717677	0.842592259	1.825439172	0.603470624	0.195363108	1.403975696	0.167663737	0.258273739	-0.023842473	-0.446977502	1.523165155	0.713488578	-0.902393588	0.293654744	-0.057930049	-0.794970891	0.251237576	-1.068431117	-1.385954264	0.202310601	0.776421761	0.696025208	-0.09208509	0.6448541	0.315058297	0.531447525	0.998710851
GRMZM2G099595	-0.071581727	0.424507616	0.731172307	-2.998020796	0.469675385	-2.645701413	0.477294855	-2.468001988	-2.171527717	1.056453949	-2.104600628	0.653262666	0.965610478	-1.993601218	-1.946202375	0.484942137	-1.902810954	0.372878156	-1.862731867	0.202310601	0.251237576	-0.112627241	-0.064754379	-1.790524917	-1.757666049	-0.126347925	0.223213218	-1.697120332	0.315058297	1.184000049	-1.669043821	-1.642224543	0.83291742	0.555132042	0.611662814	1.286210621	0.998710851	-1.591873889	-1.568142731	-1.545263217	0.307908216	-1.523165155	-1.501786817	-1.48107362	0.195363108	-1.460977052	-1.441453795	-1.422465003	-1.403975696
GRMZM2G079774	-0.892205847	0.579132162	-0.636490883	-0.539308633	0.722302208	0.902393588	2.171527717	0.160759774	-0.595318735	-2.998020796	-1.642224543	2.645701413	0.387522319	0.794970891	-1.545263217	-0.167663737	0.329407333	1.044626445	-1.044626445	-0.322224522	-1.270787244	-0.678771572	-0.237202109	-1.385954264	-1.105318189	-1.441453795	-0.51582268	-2.645701413	-0.43197323	1.545263217	1.757666049	0.492617885	1.105318189	-0.500322766	-0.044289159	-0.619896262	1.790524917	0.678771572	1.403975696	0.209267873	0.508057465	0.071581727	-0.105775004	-0.272384894	0.439462999	0.731172307	0.882109877	0.051108415	0.944119285
GRMZM2G349380	-2.998020796	-2.645701413	-0.188425032	0.286550499	-2.468001988	1.726602201	0.153863466	-0.003405752	-0.336607179	0.954809756	0.307908216	-0.300773842	-0.372878156	-2.171527717	-2.104600628	0.258273739	1.790524917	0.126347925	-2.045954276	-1.993601218	-1.902810954	2.045954276	-0.462083086	-0.555132042	0.112627241	-1.862731867	-1.757666049	-1.726602201	-1.697120332	-0.387522319	0.064754379	0.862182757	-0.174575701	0.500322766	-1.669043821	0.595318735	0.279460686	-1.642224543	0.484942137	0.394875486	1.616536998	1.441453795	-1.616536998	-0.078412413	0.167663737	-1.591873889	0.133217035	1.143773961	-1.568142731
GRMZM2G067183	-0.372878156	0.508057465	0.003405752	0.300773842	1.568142731	-1.032943298	0.500322766	-1.286210621	0.74010031	0.343824517	1.33442315	2.645701413	1.757666049	-1.642224543	-0.279460686	-0.713488578	0.51582268	-0.230202032	-0.174575701	0.188425032	-1.080563549	-1.009990169	2.468001988	1.032943298	1.255660378	0.216235289	-1.211918765	1.790524917	0.09208509	-0.030656506	-0.653262666	0.872103029	1.862731867	-2.998020796	0.209267873	-0.758136008	-0.539308633	-0.098927729	0.976525035	1.301946185	-2.104600628	1.156974916	1.056453949	1.130769373	-0.057930049	0.611662814	-1.156974916	-0.628171949	-0.358313528
GRMZM5G884270	0.619896262	-0.713488578	-0.636490883	0.044289159	1.545263217	0.188425032	-0.477294855	-0.976525035	-2.998020796	-0.057930049	0.628171949	1.080563549	1.156974916	-0.010217413	-0.030656506	-0.085246759	1.642224543	0.417065588	0.064754379	-1.568142731	-1.993601218	0.500322766	-1.862731867	-0.758136008	0.358313528	-2.104600628	-0.603470624	-0.265322712	-0.003405752	-0.272384894	1.143773961	-0.174575701	-0.044289159	-0.209267873	0.394875486	-0.409646587	0.293654744	-1.385954264	-0.892205847	-0.965610478	-0.098927729	-1.056453949	1.105318189	0.571095686	-0.112627241	0.484942137	-1.021399468	0.133217035	-1.240815502
GRMZM5G806257	0.105775004	-0.998710851	0.202310601	0.731172307	0.051108415	0.595318735	0.329407333	-0.587206217	-2.645701413	0.74010031	0.09208509	0.251237576	-0.322224522	-0.696025208	-0.223213218	0.126347925	0.804348643	0.998710851	-1.726602201	0.653262666	-0.628171949	1.669043821	-1.757666049	-0.531447525	0.044289159	-0.402250065	-0.469675385	-1.862731867	-0.619896262	0.195363108	0.188425032	0.704730028	-0.017029548	-0.286550499	-0.244213829	1.441453795	1.48107362	-0.153863466	-0.51582268	0.417065588	0.892205847	-0.174575701	0.078412413	0.209267873	0.547203211	0.336607179	0.394875486	-0.037471962	0.7490877
GRMZM2G156937	0.785662535	0.603470624	-0.216235289	-0.35105981	0.83291742	0.216235289	0.595318735	-0.892205847	-1.993601218	0.571095686	0.372878156	1.441453795	-1.032943298	2.345104662	0.051108415	1.009990169	0.365586148	0.329407333	2.045954276	0.619896262	-1.170380633	1.33442315	-0.380190046	-1.056453949	-1.068431117	-0.223213218	0.563095926	0.45451733	0.307908216	0.126347925	0.767246816	1.286210621	0.842592259	-0.987557182	-0.531447525	1.385954264	-0.251237576	2.171527717	-0.595318735	-0.7490877	0.462083086	-1.757666049	-0.862182757	-1.545263217	-0.126347925	0.085246759	0.678771572	-1.385954264	-0.329407333
GRMZM2G053394	0.531447525	-2.998020796	-2.645701413	-2.468001988	0.83291742	0.119484771	1.591873889	-2.345104662	0.722302208	0.071581727	-0.017029548	1.044626445	0.358313528	0.587206217	0.037471962	1.080563549	0.7490877	2.998020796	-2.104600628	-2.045954276	-1.902810954	-1.862731867	1.790524917	-1.825439172	0.126347925	-1.790524917	0.43197323	1.902810954	0.085246759	-1.757666049	-1.726602201	-1.697120332	0.209267873	-1.616536998	0.611662814	-1.591873889	-1.568142731	0.813797671	0.167663737	0.112627241	-1.545263217	1.130769373	-1.523165155	-1.501786817	1.368372038	0.758136008	0.35105981	-0.030656506	0.279460686
GRMZM2G048392	1.143773961	-0.767246816	-0.188425032	-0.044289159	0.35105981	0.902393588	-1.385954264	0.126347925	-1.902810954	-0.085246759	-0.687372812	0.492617885	-0.446977502	-0.293654744	-0.209267873	0.153863466	0.653262666	0.523619123	-0.539308633	1.117953259	-1.117953259	-0.852346618	-0.469675385	0.279460686	-1.286210621	0.044289159	-0.579132162	-2.104600628	1.197842699	-0.923055543	-0.098927729	-0.380190046	-0.35105981	-0.74010031	-0.547203211	-0.017029548	-0.09208509	0.343824517	0.804348643	0.286550499	-0.902393588	-0.272384894	-0.023842473	-1.862731867	0.237202109	1.286210621	-0.944119285	-0.409646587	0.965610478
GRMZM2G125585	1.255660378	0.209267873	-0.462083086	0.307908216	0.595318735	1.080563549	-0.286550499	0.293654744	-1.862731867	0.628171949	-0.43197323	1.460977052	-0.105775004	-0.387522319	-0.987557182	0.105775004	1.441453795	1.286210621	-1.226239142	0.882109877	0.140092436	0.653262666	-1.669043821	0.071581727	1.226239142	-0.044289159	0.571095686	-1.946202375	0.085246759	-0.670220259	-0.547203211	0.167663737	-0.424507616	-0.965610478	0.133217035	1.726602201	0.923055543	-0.587206217	-0.484942137	0.258273739	0.300773842	-0.251237576	-1.825439172	-1.385954264	-0.265322712	-0.258273739	-0.279460686	-0.704730028	-0.315058297
GRMZM2G118037	-0.43197323	1.351202935	0.223213218	-0.078412413	0.704730028	-1.021399468	0.611662814	-1.993601218	-2.171527717	0.670220259	0.358313528	1.697120332	2.468001988	-0.174575701	0.078412413	-0.119484771	0.794970891	0.477294855	-0.469675385	0.336607179	1.642224543	-1.009990169	-0.230202032	0.892205847	1.545263217	-0.343824517	-1.255660378	1.790524917	0.492617885	1.080563549	-0.722302208	-0.785662535	0.776421761	-0.595318735	1.286210621	-1.403975696	-1.669043821	0.380190046	2.645701413	0.279460686	-2.468001988	0.636490883	0.603470624	1.156974916	0.842592259	0.071581727	-0.484942137	2.249880663	-0.976525035
GRMZM2G126781	-0.010217413	-2.998020796	0.195363108	1.068431117	-2.645701413	1.009990169	-2.468001988	1.226239142	-0.188425032	-0.119484771	-0.003405752	-0.6448541	-0.45451733	-0.713488578	0.044289159	-0.258273739	0.167663737	-0.279460686	-2.345104662	0.023842473	-0.293654744	-0.307908216	0.057930049	1.080563549	-0.785662535	0.43197323	-0.394875486	-0.563095926	0.146974467	0.555132042	0.813797671	0.307908216	-0.167663737	-2.171527717	0.272384894	0.767246816	-0.619896262	1.184000049	0.587206217	-0.044289159	-0.085246759	0.611662814	-2.045954276	0.603470624	1.757666049	-0.653262666	-1.993601218	-1.946202375	-0.023842473
GRMZM2G101900	2.998020796	-0.492617885	0.387522319	-0.484942137	1.351202935	-0.051108415	-0.579132162	-1.105318189	-2.998020796	0.017029548	-0.43197323	0.7490877	-1.009990169	-0.202310601	-1.197842699	-0.603470624	1.318010897	-0.678771572	-0.336607179	0.43197323	-1.156974916	-1.143773961	-1.240815502	0.954809756	-0.776421761	0.587206217	-0.044289159	-0.387522319	1.170380633	0.653262666	1.156974916	0.731172307	0.167663737	0.555132042	0.394875486	0.74010031	1.591873889	-0.563095926	-0.882109877	1.286210621	-1.568142731	-1.092857156	-0.071581727	-0.555132042	-0.216235289	0.078412413	-1.301946185	-0.372878156	0.469675385
GRMZM2G147452	0.713488578	-0.230202032	0.160759774	-0.119484771	0.188425032	1.044626445	1.790524917	-0.112627241	2.468001988	-1.021399468	0.140092436	-0.563095926	-1.117953259	1.368372038	-0.098927729	-0.767246816	1.616536998	0.987557182	-2.645701413	0.555132042	-2.345104662	-0.965610478	-0.202310601	-0.017029548	-0.153863466	-0.687372812	-0.872103029	-0.044289159	0.119484771	0.539308633	0.531447525	-0.336607179	-0.078412413	-0.181496015	-0.7490877	-0.500322766	-0.539308633	0.628171949	0.813797671	-0.09208509	0.579132162	1.726602201	-2.249880663	1.184000049	1.105318189	1.523165155	0.944119285	0.892205847	0.167663737
GRMZM5G883741	0.852346618	1.441453795	-0.446977502	0.531447525	1.270787244	1.642224543	-0.477294855	0.619896262	-2.171527717	2.045954276	0.188425032	0.547203211	1.902810954	-1.156974916	-0.563095926	0.842592259	2.468001988	0.595318735	-0.595318735	0.358313528	-0.237202109	1.032943298	-1.862731867	0.343824517	-1.044626445	-0.469675385	0.051108415	-1.993601218	-0.223213218	-1.286210621	-0.153863466	0.017029548	-0.902393588	-1.33442315	0.417065588	1.130769373	0.105775004	-0.661717677	0.409646587	0.767246816	-0.636490883	0.555132042	-1.385954264	-0.722302208	-0.044289159	0.83291742	-1.270787244	-0.6448541	-0.7490877
GRMZM2G173693	1.568142731	0.83291742	0.023842473	-0.265322712	-0.902393588	1.501786817	0.595318735	-1.501786817	-2.345104662	-0.216235289	-0.944119285	1.068431117	1.523165155	-0.713488578	-1.825439172	-1.726602201	0.424507616	0.6448541	0.687372812	0.133217035	-1.240815502	-0.112627241	0.315058297	0.209267873	2.345104662	-0.446977502	-0.539308633	1.318010897	0.804348643	0.603470624	0.872103029	-0.181496015	0.653262666	-1.862731867	0.064754379	0.704730028	1.441453795	1.422465003	0.462083086	1.032943298	-0.611662814	1.757666049	-0.293654744	-1.697120332	0.265322712	2.249880663	-0.45451733	0.030656506	-0.09208509
GRMZM2G125838	2.249880663	0.439462999	0.216235289	-0.508057465	-0.133217035	0.279460686	-0.944119285	-1.902810954	-0.43197323	-0.603470624	-0.387522319	-0.35105981	-0.696025208	-1.032943298	-0.315058297	0.704730028	0.678771572	0.587206217	-1.143773961	1.351202935	-0.057930049	-1.068431117	0.872103029	1.143773961	-1.301946185	-0.587206217	0.862182757	0.722302208	0.508057465	0.976525035	1.48107362	0.547203211	-0.372878156	-0.044289159	-1.545263217	-0.160759774	1.032943298	0.484942137	-1.184000049	0.51582268	-1.056453949	-0.51582268	-1.422465003	-2.345104662	-1.697120332	-2.171527717	-0.998710851	1.021399468	0.696025208
GRMZM2G054250	0.044289159	0.223213218	-1.385954264	0.017029548	-0.678771572	-0.611662814	0.402250065	-0.439462999	-1.697120332	0.372878156	-0.133217035	0.195363108	0.160759774	-0.202310601	-0.882109877	-0.126347925	0.579132162	0.611662814	-1.170380633	0.272384894	-1.270787244	-1.591873889	-0.687372812	-0.508057465	-0.085246759	-1.460977052	-1.009990169	-1.021399468	-0.030656506	-0.272384894	-0.044289159	-0.35105981	-0.365586148	0.785662535	-0.09208509	0.037471962	0.965610478	0.202310601	-0.112627241	1.946202375	0.167663737	2.345104662	-0.119484771	0.51582268	0.776421761	0.35105981	-0.547203211	0.83291742	0.126347925
GRMZM5G866884	0.244213829	1.130769373	-0.976525035	1.616536998	1.226239142	-0.6448541	1.197842699	-2.104600628	1.825439172	0.794970891	0.892205847	1.240815502	-0.387522319	0.265322712	-0.286550499	-0.140092436	-0.237202109	-0.230202032	-0.563095926	-0.965610478	-0.439462999	-2.345104662	0.358313528	-0.244213829	-0.023842473	0.409646587	-1.669043821	0.83291742	-0.823319923	1.568142731	0.813797671	-0.500322766	0.126347925	1.105318189	0.023842473	0.057930049	-0.003405752	-1.501786817	-0.098927729	0.852346618	-1.757666049	-0.078412413	2.468001988	1.117953259	0.539308633	-0.579132162	0.365586148	-1.044626445	1.368372038
GRMZM2G351248	0.603470624	0.804348643	-0.085246759	-2.998020796	0.030656506	0.862182757	1.351202935	0.477294855	-2.468001988	0.272384894	-2.345104662	1.184000049	0.146974467	0.892205847	-2.104600628	0.636490883	0.923055543	0.462083086	-2.045954276	-0.119484771	-1.993601218	2.345104662	-0.216235289	2.045954276	1.642224543	-1.946202375	0.216235289	-1.902810954	-1.862731867	0.696025208	2.645701413	0.439462999	0.394875486	-0.146974467	1.211918765	-1.825439172	0.74010031	0.372878156	0.343824517	0.380190046	1.143773961	-1.790524917	-1.757666049	-1.726602201	0.508057465	0.202310601	1.105318189	-1.697120332	0.105775004
GRMZM2G160325	0.571095686	-0.51582268	1.33442315	-0.307908216	-0.336607179	-0.195363108	0.394875486	0.286550499	0.174575701	0.785662535	-2.998020796	1.021399468	0.531447525	-2.645701413	-2.468001988	-2.345104662	2.045954276	1.197842699	-0.146974467	1.523165155	-0.315058297	0.547203211	0.579132162	-0.010217413	0.523619123	0.307908216	1.032943298	0.51582268	0.758136008	1.184000049	1.156974916	0.462083086	0.619896262	-2.249880663	-0.417065588	0.300773842	0.965610478	1.286210621	-0.037471962	0.6448541	-0.492617885	-0.539308633	0.713488578	-0.078412413	0.603470624	0.687372812	-0.619896262	-2.171527717	-0.636490883
GRMZM2G095147	-0.862182757	-0.051108415	2.171527717	-1.211918765	-0.923055543	-0.531447525	0.119484771	-0.965610478	0.209267873	-0.687372812	-1.523165155	-1.080563549	-1.156974916	0.223213218	0.508057465	-0.293654744	-0.216235289	-0.539308633	0.523619123	1.270787244	0.258273739	-0.944119285	0.315058297	-1.946202375	0.965610478	0.555132042	-0.023842473	-0.251237576	-0.508057465	-0.45451733	0.469675385	-0.439462999	0.387522319	-1.441453795	0.902393588	-0.044289159	-0.462083086	2.645701413	-0.547203211	0.83291742	-1.368372038	-0.563095926	2.104600628	1.33442315	-0.595318735	0.010217413	1.523165155	0.587206217	0.402250065
GRMZM2G042074	1.255660378	-0.174575701	-0.322224522	1.226239142	0.83291742	0.785662535	-0.258273739	-0.329407333	-2.998020796	1.184000049	-0.74010031	1.642224543	-0.078412413	-0.555132042	-0.45451733	0.307908216	0.539308633	0.987557182	-1.545263217	0.813797671	0.140092436	0.417065588	-2.171527717	0.372878156	0.071581727	0.713488578	0.7490877	-1.790524917	-0.272384894	-0.477294855	0.628171949	1.143773961	-0.417065588	-1.056453949	0.842592259	0.678771572	0.882109877	-1.092857156	-0.43197323	0.6448541	0.74010031	-0.794970891	-0.343824517	-0.492617885	0.387522319	0.003405752	-1.184000049	-0.424507616	-0.237202109
GRMZM2G016393	0.051108415	0.119484771	0.279460686	-0.358313528	0.477294855	0.105775004	0.307908216	0.965610478	-0.776421761	1.669043821	2.468001988	0.862182757	-0.380190046	0.064754379	0.653262666	0.758136008	0.500322766	0.315058297	1.568142731	0.446977502	-1.032943298	-0.322224522	2.249880663	1.021399468	-0.555132042	-1.48107362	0.343824517	-1.301946185	0.6448541	-0.237202109	-0.417065588	-1.318010897	-1.545263217	-0.563095926	-0.265322712	-0.209267873	-1.862731867	0.322224522	-0.523619123	-0.051108415	-0.944119285	0.258273739	0.439462999	-1.441453795	-0.365586148	-0.098927729	-0.653262666	-1.240815502	1.184000049
[truncated: 248 more columns]
