# Supplementary material for: Verification of Three-Phase Dependency Analysis Bayesian Network Learning Method for Maize Carotenoid Gene Mining
Source: Biomed Res Int. 2017 Jul 30;2017:1813494. doi: 10.1155/2017/1813494 (PMC5554554; doi:10.1155/2017/1813494)
Supplement: Supplementary file 1 — The experiment data 1 of 109 nodes, the experiment data 2 of 109 nodes, and so on are shown here. [file 1813494.f1.zip › Supplementary material/Gene100_9.csv]

V1	V2	V3	V4	V5	V6	V7	V8	V9	V10	V11	V12	V13	V14	V15	V16	V17	V18	V19	V20	V21	V22	V23	V24	V25	V26	V27	V28	V29	V30	V31	V32	V33	V34	V35	V36	V37	V38	V39	V40	V41	V42	V43	V44	V45	V46	V47	V48	V49	V50
GRMZM2G158153	0.704730028	-0.195363108	1.092857156	-0.078412413	-0.402250065	1.993601218	0.365586148	-0.160759774	-2.345104662	1.105318189	-0.842592259	-0.098927729	0.126347925	0.343824517	0.237202109	0.563095926	0.91267586	-0.085246759	0.653262666	0.35105981	-0.892205847	-1.403975696	-0.300773842	-0.010217413	1.862731867	-1.105318189	0.023842473	0.300773842	0.477294855	-1.48107362	1.021399468	0.394875486	0.209267873	-0.508057465	-0.023842473	0.315058297	0.595318735	-0.531447525	-0.813797671	-0.174575701	-1.068431117	-0.611662814	-1.669043821	-0.965610478	0.902393588	-0.188425032	-0.595318735	-0.862182757	-0.202310601
AC216264.3_FG001	1.825439172	-0.43197323	-0.74010031	0.336607179	1.790524917	-1.48107362	-1.318010897	0.704730028	-0.315058297	0.500322766	0.462083086	0.619896262	-0.998710851	-0.944119285	1.616536998	-0.35105981	-0.336607179	-0.064754379	-2.045954276	0.078412413	0.188425032	2.998020796	-1.757666049	1.368372038	-0.293654744	0.954809756	0.852346618	-0.209267873	1.021399468	-1.117953259	-0.394875486	-0.45451733	-1.286210621	-0.619896262	0.91267586	0.628171949	0.539308633	0.484942137	-0.704730028	1.591873889	-0.237202109	-1.170380633	-0.555132042	-1.33442315	0.508057465	-0.987557182	-0.6448541	-0.767246816	-1.270787244
GRMZM2G116626	0.611662814	0.010217413	0.563095926	1.270787244	0.105775004	0.902393588	0.35105981	1.255660378	-2.998020796	1.156974916	1.726602201	0.653262666	-1.184000049	0.785662535	0.767246816	1.286210621	0.071581727	-1.591873889	1.056453949	0.322224522	-1.33442315	0.446977502	-0.731172307	0.892205847	1.545263217	-0.653262666	-0.804348643	-1.318010897	-1.130769373	-0.696025208	0.51582268	-0.078412413	-1.197842699	-0.209267873	0.293654744	0.862182757	-0.017029548	-0.112627241	-1.422465003	-0.105775004	0.687372812	-0.785662535	0.209267873	-0.687372812	0.329407333	0.852346618	0.237202109	-0.670220259	0.315058297
GRMZM2G161295	0.272384894	-0.209267873	0.336607179	0.954809756	-0.758136008	-1.48107362	-0.023842473	-1.460977052	0.343824517	-0.852346618	0.603470624	1.862731867	0.265322712	-1.757666049	-1.286210621	-0.804348643	-0.508057465	-0.462083086	1.568142731	-0.237202109	-0.119484771	-1.669043821	0.872103029	0.064754379	0.45451733	-0.417065588	-0.531447525	1.080563549	0.508057465	1.790524917	1.211918765	0.462083086	1.184000049	-1.501786817	-1.616536998	0.74010031	-2.998020796	0.758136008	-0.7490877	0.003405752	-1.211918765	0.500322766	-0.329407333	1.009990169	1.226239142	0.882109877	-0.539308633	1.270787244	-1.422465003
GRMZM2G351514	-0.424507616	0.153863466	-0.181496015	-0.823319923	-0.619896262	-0.83291742	0.678771572	-0.209267873	-1.642224543	0.923055543	-0.286550499	1.286210621	1.156974916	-1.211918765	-0.555132042	-0.687372812	-1.545263217	0.003405752	0.872103029	1.270787244	-1.044626445	-1.757666049	0.767246816	-0.307908216	-0.965610478	-1.170380633	0.603470624	0.987557182	2.345104662	0.539308633	1.211918765	-1.068431117	-0.563095926	-1.318010897	-0.882109877	0.424507616	0.181496015	-0.098927729	-0.230202032	-0.336607179	-0.343824517	0.315058297	-2.345104662	-0.051108415	0.74010031	-1.726602201	0.653262666	-0.146974467	0.51582268
GRMZM2G073034	1.385954264	0.394875486	0.776421761	1.130769373	0.678771572	1.184000049	0.003405752	-0.923055543	-2.998020796	0.91267586	-1.270787244	0.293654744	0.258273739	0.358313528	-2.645701413	-0.244213829	-0.329407333	0.555132042	1.902810954	0.35105981	-0.417065588	-0.336607179	-0.944119285	0.653262666	0.902393588	-1.156974916	-0.595318735	0.722302208	-2.468001988	0.794970891	1.286210621	0.823319923	0.462083086	-1.286210621	-0.842592259	0.251237576	0.105775004	0.862182757	-0.678771572	1.368372038	0.071581727	0.030656506	0.704730028	0.713488578	0.696025208	0.6448541	0.119484771	-0.976525035	-0.181496015
GRMZM2G071675	0.636490883	-0.74010031	-0.767246816	-0.595318735	-1.032943298	-0.35105981	-0.722302208	0.409646587	-2.998020796	0.670220259	0.030656506	0.279460686	-0.140092436	-0.872103029	-1.946202375	0.146974467	1.697120332	-0.523619123	-2.045954276	-0.446977502	-1.642224543	-0.687372812	-0.944119285	0.230202032	-0.555132042	0.078412413	-0.462083086	-1.301946185	0.09208509	-0.417065588	-0.044289159	0.181496015	-0.078412413	-1.460977052	0.704730028	-0.661717677	1.068431117	-0.933535639	-1.368372038	-0.071581727	-0.731172307	0.45451733	-0.030656506	0.010217413	0.017029548	-0.064754379	-1.318010897	-0.902393588	-0.230202032
GRMZM2G391473	1.351202935	-0.272384894	-2.998020796	0.767246816	-2.645701413	-0.174575701	-2.468001988	0.071581727	-2.345104662	1.946202375	1.226239142	1.902810954	-0.230202032	-2.249880663	-0.037471962	0.195363108	-0.258273739	0.462083086	0.424507616	0.731172307	0.563095926	-1.080563549	2.345104662	0.402250065	-1.009990169	0.223213218	-0.286550499	-0.704730028	1.240815502	-0.343824517	-0.336607179	1.523165155	0.51582268	0.687372812	-0.365586148	0.842592259	0.661717677	0.272384894	0.394875486	1.301946185	-0.387522319	1.501786817	-2.171527717	-2.104600628	-0.933535639	0.603470624	-1.226239142	-0.678771572	-0.492617885
AC203093.3_FG001	-0.105775004	1.669043821	0.417065588	0.402250065	0.202310601	0.119484771	0.767246816	1.33442315	-2.468001988	-2.345104662	0.547203211	2.104600628	1.068431117	0.678771572	-2.104600628	-2.045954276	0.160759774	0.902393588	-1.993601218	1.156974916	0.030656506	-1.946202375	-1.902810954	0.687372812	1.862731867	-1.862731867	2.645701413	1.092857156	2.249880663	1.697120332	1.902810954	1.501786817	2.998020796	-1.757666049	-1.726602201	-1.697120332	-1.669043821	-1.642224543	-1.616536998	0.098927729	-1.591873889	0.51582268	-1.568142731	-1.545263217	-1.523165155	-1.501786817	-1.48107362	0.286550499	-1.460977052
GRMZM2G317610	-0.563095926	-1.170380633	-0.358313528	0.484942137	0.003405752	0.424507616	-1.130769373	0.547203211	-2.998020796	0.223213218	-0.146974467	1.318010897	0.329407333	-1.044626445	0.45451733	-0.251237576	-2.468001988	-2.345104662	-2.249880663	-2.171527717	-0.785662535	0.492617885	0.160759774	1.301946185	1.460977052	-2.104600628	0.628171949	1.226239142	-0.670220259	0.307908216	-0.523619123	-0.611662814	0.365586148	0.078412413	0.902393588	-1.143773961	0.446977502	0.678771572	1.009990169	0.358313528	-0.678771572	-0.91267586	1.422465003	0.105775004	0.587206217	0.417065588	0.322224522	-0.195363108	-0.508057465
GRMZM2G175453	1.143773961	0.315058297	1.318010897	-0.195363108	0.181496015	1.385954264	0.767246816	-0.343824517	-1.170380633	1.255660378	0.547203211	1.286210621	-0.595318735	0.902393588	-0.057930049	0.112627241	0.539308633	1.130769373	-0.74010031	0.6448541	1.825439172	0.872103029	-0.882109877	1.726602201	0.119484771	-0.098927729	0.933535639	0.45451733	0.446977502	-0.209267873	0.670220259	-0.160759774	0.976525035	-0.43197323	1.545263217	-0.678771572	-1.226239142	-0.446977502	-0.965610478	0.358313528	-0.579132162	-1.642224543	-0.119484771	0.492617885	0.678771572	1.105318189	-1.117953259	0.387522319	-0.307908216
GRMZM2G035063	-0.670220259	0.272384894	0.300773842	0.933535639	0.209267873	-1.368372038	1.211918765	-0.112627241	-1.642224543	0.078412413	0.892205847	0.402250065	0.653262666	0.017029548	-0.492617885	0.181496015	-0.6448541	-0.882109877	-0.687372812	-0.547203211	-0.500322766	-1.616536998	-0.286550499	0.119484771	0.587206217	0.713488578	0.003405752	0.251237576	0.105775004	1.993601218	1.255660378	1.616536998	1.642224543	-0.174575701	1.197842699	0.842592259	0.794970891	0.944119285	-1.48107362	0.611662814	1.318010897	-0.508057465	1.902810954	1.092857156	0.365586148	0.167663737	0.044289159	-0.133217035	2.104600628
GRMZM2G164160	0.439462999	1.211918765	0.611662814	0.722302208	-0.030656506	0.804348643	0.409646587	0.987557182	-2.645701413	1.117953259	-0.653262666	2.468001988	-0.713488578	-0.064754379	-0.902393588	0.017029548	1.184000049	1.318010897	-1.211918765	1.032943298	1.270787244	0.43197323	-1.545263217	0.74010031	2.104600628	-0.678771572	-0.112627241	-0.394875486	-0.044289159	-0.057930049	0.678771572	0.51582268	0.119484771	-0.017029548	0.776421761	1.726602201	0.653262666	0.954809756	-1.368372038	0.872103029	-1.669043821	0.842592259	-1.318010897	-0.462083086	-1.48107362	-0.037471962	0.628171949	-0.446977502	0.469675385
GRMZM2G137569	0.976525035	0.804348643	-0.336607179	-0.365586148	1.211918765	0.078412413	0.315058297	0.112627241	-1.902810954	1.255660378	0.387522319	0.322224522	1.790524917	-0.758136008	-0.555132042	-0.251237576	-0.244213829	0.017029548	-0.767246816	-1.33442315	-1.009990169	-0.160759774	-1.226239142	1.056453949	-0.112627241	-0.547203211	0.872103029	-1.697120332	1.351202935	-1.211918765	-0.722302208	0.862182757	1.044626445	-0.603470624	-0.83291742	1.270787244	-0.188425032	0.74010031	1.286210621	0.6448541	-0.976525035	0.43197323	-1.825439172	-1.642224543	-0.037471962	-0.492617885	0.279460686	1.642224543	1.523165155
GRMZM2G341027	0.372878156	0.500322766	0.286550499	0.044289159	0.230202032	2.104600628	-1.044626445	-0.336607179	-1.993601218	0.409646587	-1.130769373	0.45451733	-0.409646587	0.322224522	-0.794970891	-0.998710851	1.351202935	0.329407333	0.758136008	0.976525035	0.579132162	0.595318735	-1.523165155	-0.057930049	0.823319923	-1.032943298	1.318010897	-1.616536998	1.642224543	-1.351202935	0.469675385	0.402250065	0.628171949	0.258273739	0.862182757	1.669043821	0.307908216	-0.595318735	0.272384894	-0.35105981	-0.628171949	-0.307908216	-0.722302208	-0.6448541	-0.064754379	-0.477294855	0.804348643	-1.501786817	-0.394875486
GRMZM2G059939	-0.119484771	1.501786817	0.852346618	-0.023842473	-2.998020796	0.611662814	1.092857156	-0.078412413	1.068431117	-0.160759774	0.862182757	1.197842699	2.468001988	-2.468001988	0.195363108	-0.279460686	-0.064754379	0.794970891	-2.345104662	0.51582268	-0.409646587	-0.343824517	-2.171527717	-0.484942137	0.661717677	1.441453795	-2.104600628	2.171527717	0.571095686	1.270787244	-2.045954276	0.105775004	0.365586148	-1.946202375	-0.105775004	-1.902810954	-1.862731867	1.044626445	0.387522319	1.318010897	-1.790524917	1.170380633	-1.757666049	-1.726602201	-0.439462999	0.300773842	0.923055543	0.023842473	1.33442315
GRMZM5G872417	-1.568142731	-0.987557182	-1.460977052	0.670220259	-1.368372038	-1.946202375	0.265322712	-1.068431117	-0.696025208	-0.167663737	-0.153863466	1.105318189	-0.343824517	-1.318010897	-0.003405752	-0.251237576	-0.181496015	-1.523165155	1.056453949	1.170380633	-1.545263217	-1.351202935	-1.056453949	0.202310601	0.286550499	0.216235289	0.272384894	1.255660378	-0.258273739	0.872103029	0.358313528	0.394875486	1.156974916	0.279460686	-0.085246759	-0.484942137	0.998710851	0.45451733	0.35105981	0.933535639	-0.237202109	0.380190046	0.892205847	-0.6448541	0.237202109	1.545263217	-0.140092436	-1.33442315	-0.579132162
GRMZM2G135256	1.286210621	0.071581727	-0.265322712	0.315058297	1.009990169	1.669043821	-0.484942137	-0.272384894	-2.645701413	0.74010031	-0.636490883	0.230202032	0.555132042	0.417065588	-0.555132042	-0.343824517	2.104600628	0.767246816	-0.146974467	0.279460686	-0.230202032	1.946202375	-1.902810954	0.687372812	-0.003405752	-0.713488578	-0.329407333	-1.226239142	-0.188425032	-0.387522319	1.697120332	0.587206217	-0.258273739	-0.43197323	0.619896262	2.345104662	-0.902393588	-1.318010897	-0.237202109	0.010217413	-0.315058297	-0.336607179	-0.619896262	-1.170380633	0.293654744	0.462083086	-1.080563549	-0.579132162	-1.044626445
GRMZM2G005163	-1.33442315	0.293654744	-0.492617885	0.35105981	-0.758136008	-0.523619123	-0.469675385	0.216235289	-2.998020796	-1.105318189	-2.249880663	-0.105775004	-0.976525035	-0.862182757	-0.944119285	-1.591873889	-1.48107362	-0.265322712	0.251237576	0.91267586	-0.126347925	0.446977502	0.064754379	-1.726602201	0.523619123	-0.823319923	-0.987557182	-0.687372812	0.071581727	0.336607179	1.790524917	-1.460977052	-0.146974467	-0.571095686	-0.842592259	1.403975696	1.056453949	1.33442315	0.380190046	0.51582268	0.195363108	-0.258273739	0.571095686	0.181496015	-0.09208509	0.160759774	-0.133217035	0.09208509	-0.387522319
GRMZM5G878913	1.993601218	0.587206217	0.017029548	0.579132162	0.286550499	-0.523619123	-0.223213218	-0.555132042	-1.441453795	0.555132042	1.197842699	0.862182757	1.726602201	0.51582268	1.270787244	-0.126347925	0.300773842	-0.343824517	-0.003405752	0.140092436	0.477294855	0.251237576	0.037471962	1.441453795	1.862731867	0.852346618	0.272384894	0.872103029	1.130769373	0.74010031	1.240815502	1.902810954	0.944119285	0.508057465	-0.636490883	-0.315058297	0.394875486	0.380190046	-0.923055543	-0.424507616	-1.48107362	-0.687372812	-1.545263217	-1.068431117	-0.976525035	1.545263217	1.092857156	0.133217035	0.265322712
GRMZM2G133483	0.010217413	0.74010031	0.704730028	0.508057465	-0.078412413	-0.244213829	1.501786817	-0.83291742	2.998020796	-0.343824517	-1.301946185	-0.882109877	0.51582268	-0.43197323	-1.068431117	-2.345104662	-0.265322712	-0.336607179	-0.500322766	-0.105775004	-2.645701413	-0.653262666	0.223213218	0.051108415	-1.021399468	-0.202310601	-0.678771572	1.757666049	0.872103029	0.713488578	-0.965610478	-0.372878156	0.767246816	-1.33442315	-0.216235289	-0.976525035	-1.642224543	1.790524917	-0.394875486	0.944119285	-1.591873889	-1.240815502	2.171527717	0.965610478	1.616536998	-0.35105981	-0.126347925	-1.105318189	0.492617885
GRMZM2G046436	-0.882109877	1.130769373	-0.010217413	-0.174575701	0.140092436	0.619896262	1.790524917	-2.998020796	0.343824517	2.468001988	-1.021399468	-0.223213218	-1.044626445	1.211918765	-0.030656506	0.380190046	0.670220259	0.523619123	-2.645701413	-0.057930049	-1.270787244	-0.402250065	0.987557182	0.119484771	1.021399468	-1.523165155	-1.286210621	1.032943298	0.923055543	0.051108415	0.174575701	-0.933535639	0.767246816	1.862731867	0.358313528	-0.704730028	0.595318735	1.669043821	0.446977502	0.653262666	-0.892205847	0.7490877	-0.43197323	-2.468001988	-1.318010897	1.616536998	-0.265322712	0.272384894	0.286550499
GRMZM2G115574	-0.336607179	1.862731867	1.441453795	-0.776421761	0.098927729	-1.385954264	0.43197323	-0.892205847	0.547203211	-1.170380633	0.307908216	1.318010897	1.240815502	0.469675385	-0.085246759	0.91267586	-1.240815502	-0.91267586	0.555132042	-0.704730028	-1.591873889	-2.249880663	-0.293654744	0.539308633	1.211918765	-0.902393588	-1.351202935	-0.044289159	-0.329407333	1.156974916	0.202310601	0.462083086	-0.484942137	-0.785662535	-0.579132162	-0.315058297	-1.946202375	0.484942137	0.892205847	1.068431117	-1.318010897	0.794970891	0.071581727	-0.539308633	0.954809756	1.790524917	-0.174575701	-0.051108415	0.078412413
GRMZM2G331754	0.307908216	-0.563095926	-0.402250065	0.112627241	-1.790524917	0.555132042	1.669043821	0.767246816	0.315058297	-0.417065588	-1.368372038	-0.7490877	-0.823319923	-0.923055543	1.009990169	-0.704730028	-0.83291742	0.862182757	-1.642224543	0.619896262	-0.74010031	-1.568142731	0.636490883	0.43197323	0.678771572	-0.153863466	-0.307908216	0.35105981	-0.91267586	0.776421761	-1.184000049	0.923055543	0.477294855	0.424507616	-1.156974916	0.628171949	0.078412413	-0.380190046	-0.804348643	0.6448541	0.417065588	0.595318735	-2.645701413	-2.468001988	0.842592259	0.195363108	-1.080563549	0.153863466	-0.661717677
GRMZM2G068967	-0.823319923	0.965610478	0.126347925	0.167663737	-0.670220259	-0.933535639	1.117953259	-1.790524917	1.790524917	-1.460977052	-1.318010897	0.188425032	0.776421761	-0.315058297	-0.902393588	-0.372878156	-0.195363108	0.216235289	-0.209267873	0.653262666	0.133217035	-1.757666049	0.010217413	-0.439462999	1.697120332	0.417065588	0.358313528	1.422465003	0.954809756	1.226239142	-2.998020796	-0.153863466	1.068431117	-0.758136008	-0.500322766	-0.322224522	-1.197842699	0.446977502	0.852346618	0.696025208	-1.48107362	-0.523619123	1.726602201	0.923055543	1.301946185	-0.030656506	-1.068431117	-0.307908216	0.882109877
GRMZM2G316555	-2.998020796	1.068431117	0.230202032	1.156974916	-0.484942137	-2.645701413	0.83291742	-2.468001988	1.197842699	-0.722302208	-0.595318735	0.636490883	0.216235289	-0.119484771	0.394875486	-0.133217035	-2.249880663	0.188425032	0.595318735	0.293654744	-0.563095926	-2.171527717	-0.882109877	0.237202109	-0.237202109	-0.265322712	-0.030656506	2.249880663	1.318010897	-0.078412413	0.731172307	-0.91267586	0.6448541	-0.167663737	-0.446977502	-0.892205847	-0.023842473	-0.003405752	-2.045954276	0.923055543	-1.993601218	-0.611662814	1.021399468	1.056453949	0.244213829	0.387522319	0.146974467	0.251237576	2.645701413
GRMZM2G138076	0.687372812	0.409646587	-1.318010897	0.307908216	-0.09208509	-1.385954264	-0.83291742	-1.523165155	-2.998020796	1.422465003	-0.174575701	1.523165155	1.092857156	-0.713488578	-0.813797671	-1.032943298	1.726602201	-0.508057465	-1.184000049	0.785662535	-1.197842699	-0.181496015	-0.987557182	0.704730028	-0.653262666	0.098927729	-0.998710851	1.591873889	-0.852346618	0.446977502	0.387522319	0.998710851	1.48107362	-0.628171949	-1.301946185	1.226239142	-0.064754379	0.417065588	0.153863466	0.852346618	0.119484771	0.872103029	-2.045954276	0.653262666	1.697120332	0.329407333	-0.265322712	0.523619123	0.174575701
GRMZM2G127490	0.209267873	-0.09208509	0.140092436	-0.944119285	0.74010031	0.670220259	0.258273739	0.83291742	-0.91267586	-0.555132042	-0.670220259	-0.057930049	0.500322766	0.380190046	-0.307908216	-1.946202375	2.998020796	1.726602201	-0.531447525	0.358313528	-1.422465003	0.636490883	-2.104600628	-0.595318735	-0.687372812	-0.030656506	0.336607179	0.892205847	0.954809756	1.092857156	1.318010897	1.021399468	0.409646587	-0.35105981	0.555132042	-0.064754379	-1.286210621	-0.523619123	0.365586148	0.923055543	-0.202310601	-1.092857156	-2.249880663	-1.441453795	-0.279460686	-0.678771572	-1.790524917	-0.852346618	-0.587206217
GRMZM2G104489	-2.998020796	1.240815502	0.619896262	0.300773842	0.119484771	-0.704730028	0.492617885	-0.944119285	-2.645701413	-2.468001988	-2.345104662	1.255660378	0.43197323	-0.882109877	-0.776421761	0.6448541	-2.249880663	-2.171527717	0.167663737	-0.343824517	0.424507616	-2.104600628	0.223213218	-0.112627241	0.417065588	-0.417065588	0.731172307	1.568142731	1.591873889	2.045954276	1.790524917	-2.045954276	1.726602201	-0.523619123	0.508057465	-1.993601218	0.402250065	-0.044289159	-0.071581727	1.117953259	-0.731172307	0.293654744	1.501786817	-1.946202375	0.258273739	0.279460686	0.776421761	-0.852346618	2.468001988
GRMZM2G014934	0.619896262	-2.998020796	-2.645701413	0.167663737	0.965610478	-2.468001988	0.402250065	-2.345104662	-2.104600628	0.181496015	0.804348643	0.153863466	-2.045954276	1.009990169	-1.946202375	-0.017029548	-0.119484771	1.862731867	-1.902810954	0.133217035	1.545263217	1.441453795	0.387522319	0.010217413	2.645701413	0.35105981	0.862182757	-1.825439172	-1.790524917	0.492617885	0.446977502	0.7490877	1.351202935	-1.697120332	0.731172307	0.380190046	1.240815502	-1.642224543	-1.616536998	0.265322712	-1.591873889	0.477294855	-1.568142731	-1.545263217	0.83291742	-1.523165155	0.785662535	-1.501786817	0.037471962
GRMZM2G025302	0.017029548	-1.545263217	-1.33442315	-0.105775004	0.078412413	-0.7490877	-1.211918765	-1.286210621	-2.998020796	-1.385954264	0.057930049	1.105318189	-2.645701413	-0.902393588	-0.119484771	0.785662535	-0.563095926	-1.021399468	-1.130769373	-1.422465003	-0.322224522	0.409646587	-0.6448541	-1.441453795	-0.112627241	-0.823319923	-0.571095686	0.43197323	0.251237576	-0.003405752	0.91267586	0.258273739	0.767246816	-0.315058297	1.385954264	-1.226239142	0.167663737	0.508057465	-1.255660378	0.492617885	0.126347925	1.902810954	-0.098927729	-0.547203211	1.33442315	1.156974916	-0.555132042	2.171527717	0.336607179
GRMZM2G083975	0.758136008	-0.933535639	0.216235289	-0.595318735	0.813797671	0.987557182	0.954809756	-2.998020796	0.785662535	0.358313528	0.619896262	-2.645701413	-0.119484771	1.501786817	0.852346618	0.611662814	1.862731867	1.211918765	-2.468001988	-0.670220259	-0.380190046	-0.45451733	-1.130769373	-0.09208509	-0.343824517	-0.500322766	-0.057930049	-2.345104662	0.555132042	1.368372038	2.998020796	1.790524917	-0.628171949	1.080563549	-1.33442315	0.188425032	-0.636490883	-0.923055543	-0.484942137	-0.258273739	-0.523619123	1.032943298	1.441453795	0.286550499	-2.171527717	0.477294855	1.170380633	-0.160759774	1.825439172
GRMZM2G113127	-0.704730028	0.037471962	-0.188425032	-0.91267586	-0.696025208	0.315058297	-0.010217413	-0.300773842	1.616536998	-1.318010897	-1.697120332	-1.368372038	0.300773842	-0.085246759	-0.804348643	-1.255660378	0.439462999	-1.568142731	0.265322712	-0.531447525	-0.923055543	0.462083086	0.244213829	-1.105318189	1.523165155	0.195363108	0.140092436	0.160759774	1.642224543	-1.080563549	-1.790524917	0.653262666	0.670220259	-0.933535639	-0.244213829	-1.021399468	-0.776421761	0.044289159	-1.825439172	1.105318189	-1.642224543	-0.670220259	1.092857156	1.48107362	1.946202375	0.064754379	-2.104600628	-0.112627241	-0.758136008
GRMZM2G323182	-0.965610478	1.056453949	1.318010897	0.678771572	0.51582268	0.119484771	-0.064754379	-0.202310601	0.071581727	0.722302208	0.307908216	0.862182757	0.140092436	-0.387522319	-0.244213829	-0.030656506	0.078412413	-0.531447525	-1.021399468	-0.085246759	0.133217035	0.044289159	1.044626445	1.226239142	1.697120332	0.500322766	-0.555132042	0.579132162	1.460977052	0.223213218	-0.500322766	-0.336607179	0.636490883	0.704730028	-0.713488578	2.045954276	1.286210621	2.171527717	0.188425032	1.422465003	1.642224543	0.105775004	0.380190046	-2.998020796	-0.842592259	0.417065588	-2.645701413	0.244213829	-0.343824517
GRMZM2G146685	-0.35105981	-0.237202109	0.43197323	-0.300773842	-0.051108415	-0.45451733	1.226239142	-0.933535639	2.645701413	0.336607179	-0.731172307	-0.439462999	1.523165155	-0.343824517	-0.017029548	1.056453949	-0.628171949	0.160759774	-1.009990169	0.023842473	0.195363108	-1.33442315	0.892205847	-0.380190046	0.030656506	0.776421761	-0.329407333	1.33442315	-1.080563549	0.571095686	-2.468001988	-0.209267873	0.315058297	-0.670220259	-0.119484771	-1.197842699	-0.587206217	0.767246816	-0.462083086	-0.7490877	-0.611662814	0.322224522	1.092857156	1.170380633	0.071581727	0.595318735	-2.171527717	-0.696025208	-1.825439172
GRMZM5G871154	1.351202935	-1.501786817	2.468001988	0.785662535	1.902810954	0.492617885	-1.032943298	0.91267586	0.670220259	-1.993601218	-1.351202935	-1.385954264	1.669043821	-0.387522319	-0.83291742	0.872103029	1.993601218	1.568142731	1.021399468	0.587206217	0.251237576	-0.636490883	-0.661717677	0.531447525	1.642224543	1.240815502	1.946202375	-0.842592259	-1.226239142	1.143773961	0.862182757	0.687372812	1.318010897	0.776421761	1.48107362	1.825439172	-0.603470624	0.146974467	-0.174575701	0.216235289	-0.619896262	0.555132042	-1.862731867	-0.758136008	0.133217035	0.51582268	-1.757666049	-1.726602201	-0.119484771
GRMZM2G305046	1.056453949	0.923055543	0.300773842	-0.380190046	1.862731867	1.33442315	0.272384894	-1.501786817	2.171527717	-0.704730028	1.032943298	-1.170380633	0.322224522	1.501786817	1.117953259	1.156974916	0.146974467	-0.603470624	1.301946185	-0.804348643	-1.105318189	0.987557182	2.104600628	1.009990169	2.045954276	-0.343824517	-1.021399468	0.852346618	-0.571095686	-0.09208509	-1.044626445	0.687372812	1.286210621	-1.460977052	1.460977052	-0.017029548	0.587206217	0.619896262	0.307908216	1.197842699	-1.143773961	-1.130769373	0.469675385	-0.785662535	-0.6448541	-1.009990169	0.078412413	-0.462083086	0.882109877
GRMZM2G088273	0.923055543	0.965610478	0.51582268	0.785662535	1.056453949	-0.508057465	1.286210621	0.696025208	0.758136008	0.678771572	-1.642224543	-0.462083086	-0.174575701	-0.628171949	0.670220259	-0.687372812	-1.255660378	1.33442315	-0.976525035	-0.595318735	-0.492617885	-0.343824517	-1.226239142	0.085246759	0.823319923	-0.286550499	0.603470624	-0.307908216	0.523619123	-0.944119285	0.181496015	-0.933535639	-1.33442315	0.571095686	0.272384894	0.098927729	0.794970891	-1.270787244	0.35105981	0.279460686	-0.619896262	-0.670220259	-1.545263217	0.469675385	-0.417065588	-1.117953259	-1.044626445	1.184000049	-0.037471962
GRMZM2G029879	-0.140092436	-0.43197323	0.365586148	0.579132162	0.661717677	-1.092857156	-0.439462999	0.105775004	2.998020796	0.279460686	1.009990169	1.301946185	-0.071581727	-1.591873889	-1.33442315	-1.105318189	-1.545263217	-1.184000049	-0.603470624	-1.318010897	0.064754379	-0.923055543	0.195363108	1.170380633	1.726602201	-0.017029548	-1.825439172	1.523165155	0.539308633	1.422465003	0.071581727	-0.119484771	-1.790524917	0.126347925	0.619896262	-1.422465003	-2.104600628	0.146974467	-0.555132042	0.944119285	-0.794970891	-0.704730028	0.469675385	-0.636490883	-0.307908216	0.272384894	-2.998020796	0.380190046	-1.616536998
GRMZM2G301909	-0.037471962	0.7490877	1.523165155	-0.417065588	-0.181496015	-0.758136008	0.862182757	-1.105318189	0.372878156	-0.628171949	-0.595318735	1.993601218	-0.603470624	-0.785662535	-1.33442315	-0.731172307	-0.776421761	-0.500322766	1.255660378	1.197842699	0.044289159	-1.021399468	0.112627241	-0.933535639	0.265322712	-0.003405752	-0.687372812	1.351202935	1.044626445	1.862731867	0.023842473	-1.156974916	-0.223213218	-0.547203211	-0.329407333	0.181496015	-1.056453949	0.078412413	1.105318189	0.91267586	0.286550499	0.987557182	0.258273739	0.380190046	-0.402250065	1.211918765	0.484942137	-0.7490877	0.954809756
GRMZM2G424205	1.993601218	-0.902393588	1.130769373	0.133217035	1.669043821	-0.051108415	0.852346618	0.439462999	0.216235289	2.345104662	2.998020796	1.301946185	1.697120332	0.571095686	1.441453795	0.965610478	0.462083086	-0.119484771	-0.409646587	-1.197842699	0.322224522	1.240815502	0.064754379	0.696025208	-0.923055543	1.117953259	0.923055543	0.380190046	-0.209267873	-0.195363108	-1.117953259	1.385954264	0.987557182	0.731172307	0.531447525	-2.045954276	-0.105775004	-0.216235289	1.143773961	0.153863466	0.237202109	0.670220259	1.211918765	0.160759774	0.804348643	1.545263217	-1.993601218	-0.037471962	-1.790524917
GRMZM2G108570	1.946202375	0.661717677	0.307908216	0.358313528	0.767246816	0.153863466	0.329407333	-0.322224522	-0.882109877	0.579132162	-1.368372038	-0.09208509	1.032943298	0.126347925	0.7490877	1.726602201	0.987557182	-0.133217035	-2.998020796	0.181496015	-2.345104662	-1.726602201	-0.35105981	-1.240815502	1.351202935	-2.171527717	-0.43197323	-0.51582268	-0.286550499	-0.555132042	0.872103029	0.272384894	0.628171949	0.462083086	0.547203211	-0.023842473	0.300773842	1.301946185	0.91267586	0.265322712	0.216235289	0.051108415	1.385954264	-0.153863466	0.336607179	0.998710851	0.587206217	-0.842592259	-0.030656506
GRMZM2G115998	1.021399468	-0.064754379	-0.230202032	-0.237202109	0.188425032	1.790524917	0.469675385	-0.842592259	-0.603470624	0.078412413	0.230202032	-1.318010897	-0.223213218	1.441453795	-0.687372812	0.892205847	1.318010897	-1.032943298	-0.010217413	2.998020796	-1.568142731	0.944119285	1.080563549	0.017029548	1.993601218	-0.446977502	-0.862182757	0.409646587	0.307908216	0.776421761	0.071581727	1.226239142	0.571095686	-0.402250065	0.126347925	1.545263217	-0.003405752	1.032943298	-0.531447525	0.713488578	-1.130769373	-0.508057465	0.003405752	-0.202310601	-0.933535639	-0.057930049	0.477294855	-0.265322712	1.422465003
GRMZM5G835323	0.037471962	0.603470624	-0.300773842	-1.403975696	0.902393588	-0.188425032	0.402250065	-1.697120332	0.611662814	-1.240815502	-1.226239142	1.240815502	1.368372038	-0.030656506	-1.669043821	-1.301946185	0.160759774	0.057930049	1.286210621	-1.33442315	-0.174575701	-0.424507616	0.892205847	-0.758136008	0.358313528	-0.91267586	-2.249880663	-0.343824517	0.380190046	0.446977502	0.842592259	-1.993601218	-0.202310601	-0.044289159	0.628171949	-1.105318189	-0.902393588	-1.197842699	0.098927729	-0.636490883	-0.933535639	-0.372878156	1.825439172	1.197842699	0.6448541	1.105318189	0.153863466	-1.021399468	0.539308633
GRMZM2G076474	-0.071581727	-2.998020796	0.202310601	-2.645701413	1.545263217	1.080563549	1.523165155	-2.468001988	-2.345104662	0.078412413	-2.249880663	1.021399468	-2.171527717	-1.993601218	0.051108415	-1.946202375	0.439462999	1.757666049	0.523619123	1.403975696	0.933535639	1.862731867	0.230202032	2.345104662	1.790524917	-0.078412413	-1.862731867	-1.825439172	0.112627241	0.7490877	1.105318189	0.758136008	0.153863466	-1.757666049	-0.140092436	0.329407333	-1.726602201	-1.697120332	-0.365586148	0.272384894	-1.669043821	-0.119484771	1.422465003	0.462083086	1.092857156	0.619896262	0.987557182	-0.037471962	1.197842699
GRMZM2G037012	0.051108415	1.130769373	0.003405752	0.112627241	-0.216235289	0.085246759	-0.030656506	-0.523619123	1.092857156	-0.579132162	0.181496015	0.882109877	-0.078412413	-0.731172307	0.571095686	-1.226239142	0.167663737	-0.230202032	1.697120332	-0.446977502	0.380190046	-0.7490877	0.785662535	-0.195363108	0.140092436	0.469675385	-2.998020796	0.595318735	-1.044626445	-0.017029548	-2.645701413	-0.044289159	-0.555132042	0.424507616	-0.704730028	1.226239142	0.661717677	1.009990169	-0.329407333	0.74010031	-0.126347925	0.83291742	-2.468001988	-2.345104662	0.704730028	-0.439462999	-0.670220259	-0.531447525	-0.343824517
GRMZM2G100452	-0.394875486	1.697120332	0.776421761	0.687372812	-0.09208509	1.301946185	0.842592259	1.044626445	0.085246759	0.758136008	-0.085246759	1.130769373	-0.555132042	-0.174575701	2.645701413	0.202310601	-0.057930049	-0.237202109	-0.35105981	0.126347925	-0.731172307	0.112627241	0.6448541	-0.010217413	2.998020796	0.279460686	-0.484942137	0.09208509	-0.202310601	0.83291742	-1.301946185	0.244213829	-1.33442315	-1.009990169	0.619896262	-0.872103029	-0.74010031	0.965610478	-1.170380633	0.315058297	-1.226239142	-0.272384894	-2.645701413	-0.547203211	0.424507616	0.882109877	0.057930049	0.010217413	-0.611662814
GRMZM2G436710	-0.439462999	0.402250065	-0.017029548	0.571095686	0.244213829	-0.244213829	0.83291742	-0.469675385	-0.160759774	0.078412413	-1.056453949	0.387522319	-0.153863466	0.965610478	0.343824517	-1.545263217	-1.184000049	0.424507616	0.209267873	0.91267586	-1.240815502	-0.944119285	0.785662535	-0.51582268	0.071581727	-0.785662535	-0.372878156	0.872103029	1.757666049	1.117953259	0.933535639	-0.265322712	0.842592259	0.167663737	-0.402250065	-0.336607179	0.923055543	-0.923055543	-1.117953259	0.882109877	0.202310601	-1.460977052	0.587206217	0.619896262	-0.933535639	-0.112627241	-0.882109877	-0.713488578	0.767246816
GRMZM2G081127	1.080563549	0.112627241	-0.670220259	1.170380633	0.358313528	1.368372038	0.661717677	0.146974467	-2.645701413	1.902810954	0.462083086	1.301946185	2.998020796	-0.653262666	-1.790524917	-0.882109877	2.345104662	1.616536998	-1.211918765	0.611662814	-0.35105981	0.105775004	-2.104600628	-0.439462999	-0.484942137	-0.293654744	0.439462999	-1.726602201	0.140092436	-0.09208509	1.385954264	0.446977502	-0.329407333	-1.009990169	0.636490883	0.872103029	0.678771572	-1.080563549	-0.272384894	0.230202032	-1.48107362	-0.064754379	-0.704730028	-0.300773842	0.944119285	0.167663737	-1.825439172	0.387522319	-0.492617885
GRMZM2G083518	0.078412413	0.842592259	0.500322766	-0.785662535	-0.678771572	-0.823319923	0.776421761	-0.492617885	-2.998020796	-1.143773961	-1.825439172	-0.09208509	1.240815502	-0.160759774	-1.044626445	-0.579132162	-0.365586148	-0.044289159	0.023842473	0.223213218	-1.993601218	-1.270787244	-1.48107362	-0.394875486	2.045954276	-1.080563549	-0.892205847	0.785662535	0.322224522	2.468001988	1.501786817	-0.230202032	0.6448541	-1.184000049	-0.286550499	0.892205847	-1.068431117	1.523165155	1.009990169	0.43197323	-1.170380633	0.823319923	1.255660378	-0.030656506	0.531447525	1.902810954	0.636490883	0.286550499	0.477294855
GRMZM2G111472	-0.954809756	1.117953259	-0.216235289	-0.365586148	-0.417065588	-0.83291742	1.143773961	-1.697120332	-0.044289159	0.181496015	-0.508057465	0.687372812	1.501786817	0.394875486	-2.104600628	-0.051108415	-0.902393588	-0.43197323	1.48107362	-0.462083086	-0.484942137	-0.469675385	0.842592259	-1.33442315	-0.085246759	-1.48107362	-1.422465003	0.51582268	0.064754379	1.240815502	1.301946185	-0.722302208	-0.531447525	1.568142731	-1.501786817	0.358313528	-1.270787244	0.6448541	0.767246816	0.678771572	-0.767246816	0.469675385	1.080563549	1.130769373	1.156974916	1.351202935	0.160759774	1.318010897	0.987557182
GRMZM5G834128	0.293654744	1.117953259	0.603470624	-0.424507616	-0.469675385	0.153863466	1.422465003	-1.501786817	0.329407333	-0.085246759	-0.365586148	0.030656506	0.653262666	0.424507616	-2.104600628	-1.092857156	-0.315058297	2.468001988	-0.823319923	0.670220259	-1.009990169	-1.757666049	-0.852346618	-1.021399468	1.523165155	-0.286550499	-1.946202375	1.757666049	0.571095686	2.249880663	1.545263217	1.616536998	1.270787244	-0.010217413	-1.032943298	0.223213218	0.064754379	0.998710851	-1.270787244	0.409646587	-0.91267586	-1.902810954	2.998020796	1.092857156	0.804348643	0.758136008	-0.358313528	0.446977502	0.842592259
GRMZM2G169481	0.462083086	-0.484942137	-1.080563549	0.954809756	1.385954264	0.794970891	0.595318735	0.017029548	-2.249880663	0.071581727	-0.923055543	1.403975696	-0.105775004	-1.642224543	-0.722302208	-0.713488578	-0.696025208	-0.322224522	-1.032943298	0.439462999	-2.104600628	-0.91267586	-0.365586148	-0.492617885	1.642224543	-1.523165155	0.45451733	-1.143773961	0.202310601	-0.767246816	0.696025208	-0.636490883	-0.037471962	-1.48107362	-0.409646587	0.343824517	0.998710851	-0.892205847	-0.51582268	1.993601218	-1.130769373	0.477294855	0.6448541	-1.240815502	0.670220259	2.645701413	-0.976525035	-0.315058297	-0.044289159
GRMZM2G054588	1.825439172	0.358313528	0.279460686	-0.293654744	0.126347925	-0.030656506	-0.500322766	-1.044626445	0.794970891	-0.126347925	0.064754379	0.071581727	2.468001988	0.293654744	-0.315058297	-0.279460686	0.258273739	-0.09208509	-0.181496015	-0.195363108	-1.591873889	-0.555132042	-0.531447525	0.653262666	0.555132042	-0.417065588	-0.45451733	2.345104662	1.422465003	0.153863466	-1.460977052	-0.329407333	1.044626445	0.044289159	-0.933535639	-1.669043821	-2.645701413	0.09208509	-0.91267586	-0.923055543	-0.619896262	-1.403975696	-0.057930049	-1.226239142	1.993601218	0.343824517	-1.385954264	0.223213218	-0.244213829
GRMZM2G005938	0.571095686	-0.195363108	-0.409646587	0.823319923	0.954809756	1.642224543	-0.892205847	-1.117953259	-2.998020796	2.645701413	0.579132162	0.387522319	-0.965610478	0.085246759	0.767246816	1.105318189	0.394875486	0.098927729	1.044626445	1.240815502	-1.044626445	0.492617885	-2.171527717	-0.188425032	0.188425032	0.112627241	-0.003405752	-1.130769373	1.318010897	0.071581727	0.653262666	1.862731867	1.790524917	-0.696025208	1.993601218	0.91267586	0.477294855	-0.862182757	-0.462083086	0.044289159	0.678771572	-1.545263217	-0.776421761	0.51582268	0.424507616	-0.523619123	-0.539308633	-0.023842473	0.785662535
GRMZM5G862071	0.603470624	1.523165155	-0.636490883	0.140092436	1.385954264	-0.998710851	1.568142731	-0.731172307	-1.105318189	-0.044289159	-0.078412413	-0.387522319	-2.345104662	1.825439172	-1.460977052	-0.023842473	0.119484771	-0.09208509	2.468001988	0.098927729	-1.616536998	1.403975696	0.387522319	-1.170380633	-0.842592259	0.153863466	-2.249880663	-1.642224543	-0.670220259	-0.010217413	0.531447525	-0.547203211	-0.579132162	1.368372038	-0.794970891	0.954809756	0.057930049	0.188425032	-0.713488578	-0.365586148	-1.032943298	0.322224522	0.74010031	-0.003405752	-0.83291742	-0.119484771	0.767246816	-0.265322712	0.758136008
GRMZM2G024312	0.167663737	0.555132042	-0.687372812	-1.240815502	-0.237202109	-0.823319923	-0.523619123	-0.223213218	1.211918765	-1.616536998	-0.343824517	0.09208509	1.351202935	-1.697120332	-0.923055543	-0.587206217	-0.336607179	0.293654744	-0.064754379	1.757666049	0.571095686	0.74010031	-0.794970891	-2.045954276	0.823319923	0.603470624	1.616536998	1.080563549	1.545263217	-0.477294855	-1.211918765	0.976525035	0.661717677	-1.368372038	-0.209267873	0.954809756	0.010217413	-1.301946185	2.171527717	0.83291742	-0.508057465	-1.669043821	-2.998020796	-1.021399468	2.998020796	-1.143773961	0.237202109	-0.265322712	0.394875486
GRMZM2G107498	1.460977052	0.91267586	-0.731172307	0.45451733	1.523165155	-0.91267586	-0.43197323	-1.946202375	0.133217035	-0.133217035	0.731172307	1.790524917	0.804348643	-1.156974916	-0.071581727	0.146974467	0.209267873	-1.092857156	2.645701413	0.492617885	-0.402250065	-0.670220259	-0.439462999	-0.098927729	0.587206217	-0.315058297	-1.697120332	-0.571095686	0.722302208	-0.057930049	-0.293654744	-1.021399468	-0.202310601	-1.825439172	0.477294855	-0.017029548	-0.387522319	0.112627241	0.126347925	0.603470624	-0.174575701	0.767246816	1.255660378	-0.687372812	1.642224543	1.441453795	-1.301946185	0.83291742	0.872103029
GRMZM2G308034	1.616536998	-0.758136008	-2.998020796	0.696025208	0.523619123	-2.645701413	0.43197323	-0.258273739	2.645701413	-0.153863466	-0.188425032	0.944119285	-1.197842699	0.555132042	-0.6448541	-2.468001988	0.044289159	-2.345104662	0.965610478	-0.987557182	-0.244213829	-0.394875486	0.636490883	-0.83291742	0.343824517	1.697120332	0.595318735	0.365586148	-0.105775004	-0.202310601	-0.523619123	0.244213829	-0.279460686	-2.104600628	-1.068431117	-1.270787244	-0.017029548	2.468001988	-0.216235289	-0.852346618	0.258273739	-0.126347925	-2.045954276	-0.687372812	0.619896262	-0.539308633	-0.892205847	0.216235289	0.010217413
GRMZM2G085420	-1.143773961	1.197842699	-0.417065588	-0.202310601	-1.757666049	-0.251237576	0.286550499	0.813797671	0.417065588	0.202310601	0.010217413	0.7490877	0.619896262	1.105318189	-0.7490877	0.343824517	0.140092436	-1.197842699	1.460977052	0.251237576	-0.987557182	0.409646587	1.790524917	-1.697120332	1.726602201	-1.156974916	-0.057930049	-0.547203211	0.678771572	0.272384894	2.045954276	-0.023842473	-0.758136008	1.240815502	0.195363108	0.300773842	-0.902393588	-0.954809756	-0.696025208	0.944119285	0.003405752	-0.944119285	-0.409646587	-2.998020796	-0.813797671	0.892205847	-0.579132162	0.105775004	-0.112627241
GRMZM2G062718	0.230202032	1.044626445	-2.998020796	-2.645701413	-0.230202032	0.852346618	0.687372812	-2.468001988	1.156974916	0.010217413	-0.09208509	0.286550499	0.45451733	0.126347925	2.345104662	-0.380190046	0.902393588	-0.343824517	-2.249880663	-2.171527717	-2.104600628	-2.045954276	1.642224543	-0.571095686	-0.670220259	-0.636490883	-0.293654744	0.83291742	1.368372038	-1.993601218	-0.579132162	-0.776421761	-0.030656506	-0.547203211	0.272384894	0.661717677	0.713488578	-0.611662814	-0.628171949	0.539308633	0.595318735	-1.862731867	1.197842699	-1.825439172	-0.057930049	0.571095686	-0.539308633	0.051108415	-0.153863466
GRMZM2G003426	0.785662535	0.300773842	-1.616536998	0.307908216	1.902810954	-0.402250065	0.902393588	0.044289159	1.591873889	0.43197323	-0.758136008	-1.460977052	-0.085246759	-0.477294855	-0.563095926	-0.188425032	0.051108415	0.09208509	1.568142731	0.523619123	-0.571095686	0.188425032	0.484942137	0.279460686	-2.998020796	1.080563549	-0.823319923	0.500322766	1.255660378	0.813797671	-0.469675385	0.882109877	-0.380190046	-2.249880663	-1.197842699	-0.358313528	-1.105318189	-0.636490883	0.153863466	0.965610478	-1.591873889	-1.270787244	-1.092857156	-0.785662535	0.030656506	0.272384894	-0.43197323	0.286550499	1.48107362
GRMZM5G843555	-1.080563549	0.628171949	0.174575701	1.240815502	-1.211918765	-0.882109877	0.731172307	-0.965610478	0.45451733	0.603470624	-0.167663737	0.74010031	1.460977052	0.842592259	-0.852346618	0.223213218	0.862182757	-0.51582268	-0.126347925	-0.322224522	-0.279460686	-0.446977502	1.993601218	-0.944119285	0.976525035	0.293654744	-0.508057465	1.501786817	-0.587206217	1.130769373	-0.146974467	-0.823319923	0.372878156	0.462083086	-0.595318735	-1.056453949	0.343824517	1.825439172	-0.547203211	-0.696025208	-0.078412413	-0.492617885	0.872103029	-0.160759774	-0.45451733	0.892205847	0.619896262	0.286550499	-0.051108415
GRMZM2G396397	0.882109877	0.704730028	0.365586148	0.030656506	-0.140092436	-1.301946185	0.071581727	0.057930049	0.731172307	0.188425032	-0.195363108	-0.628171949	1.021399468	0.358313528	-1.385954264	-0.119484771	-0.492617885	-0.976525035	0.954809756	0.417065588	-2.998020796	-0.933535639	1.697120332	-0.286550499	0.085246759	-1.726602201	-0.794970891	2.171527717	-0.146974467	1.441453795	0.153863466	-0.343824517	1.044626445	-0.071581727	0.343824517	0.372878156	-0.83291742	0.469675385	-0.223213218	-0.09208509	-1.422465003	-0.409646587	1.757666049	1.726602201	0.133217035	1.184000049	-0.078412413	0.167663737	0.112627241
GRMZM2G049013	0.195363108	-0.439462999	-0.417065588	-0.315058297	0.085246759	0.500322766	-1.385954264	-0.555132042	1.009990169	-0.776421761	-0.010217413	1.545263217	-1.368372038	0.477294855	-0.017029548	-0.358313528	0.555132042	-0.83291742	0.358313528	0.153863466	-2.249880663	0.037471962	1.669043821	-1.032943298	1.068431117	-1.591873889	-0.7490877	0.051108415	0.587206217	0.188425032	0.83291742	-0.343824517	0.272384894	-0.653262666	-0.687372812	0.105775004	-0.696025208	-0.336607179	-0.409646587	-0.064754379	-0.603470624	-1.697120332	0.842592259	0.336607179	-0.322224522	0.126347925	0.315058297	0.071581727	-1.545263217
GRMZM2G043295	1.669043821	-0.057930049	-0.500322766	1.105318189	0.965610478	-1.156974916	0.462083086	-0.661717677	2.345104662	2.171527717	0.954809756	-0.628171949	-0.571095686	-0.286550499	1.270787244	0.804348643	-0.603470624	0.91267586	0.188425032	-0.126347925	-0.882109877	-2.045954276	0.372878156	1.226239142	-2.171527717	1.156974916	-0.531447525	-0.758136008	-0.216235289	-0.307908216	-1.523165155	-0.230202032	-0.462083086	-0.098927729	0.611662814	-0.776421761	0.365586148	-0.595318735	-1.056453949	1.460977052	0.044289159	-0.35105981	0.933535639	-0.085246759	-0.064754379	0.153863466	-0.653262666	0.003405752	0.09208509
GRMZM2G037496	-1.156974916	-0.272384894	-0.469675385	-0.424507616	-0.126347925	-1.240815502	0.188425032	0.209267873	2.345104662	0.146974467	-0.216235289	-0.43197323	0.394875486	0.300773842	-0.91267586	-0.258273739	-0.954809756	-0.500322766	1.48107362	-0.315058297	-2.645701413	-1.368372038	1.616536998	-1.301946185	-0.237202109	-0.722302208	-0.343824517	1.757666049	-0.636490883	1.403975696	-0.098927729	0.09208509	0.051108415	0.571095686	-0.372878156	-0.462083086	-0.35105981	0.078412413	-0.508057465	0.223213218	0.181496015	-0.628171949	1.697120332	1.092857156	-0.244213829	0.315058297	0.91267586	0.619896262	0.862182757
GRMZM2G055135	0.603470624	-0.469675385	0.336607179	-0.731172307	-0.6448541	0.251237576	1.697120332	0.611662814	0.91267586	1.523165155	0.380190046	-0.272384894	1.009990169	-0.244213829	-0.45451733	1.368372038	0.140092436	1.790524917	0.862182757	0.976525035	-2.171527717	-1.301946185	-0.767246816	0.6448541	1.33442315	-1.523165155	-1.056453949	1.757666049	-0.477294855	2.104600628	0.704730028	0.265322712	1.056453949	0.804348643	-0.216235289	-0.484942137	-0.380190046	0.417065588	0.944119285	1.021399468	0.45451733	1.403975696	0.477294855	-1.993601218	-0.653262666	1.143773961	0.057930049	-0.387522319	1.092857156
GRMZM2G110369	0.394875486	-1.460977052	0.595318735	1.545263217	-0.216235289	-0.272384894	0.023842473	-0.085246759	0.43197323	0.804348643	0.003405752	-1.790524917	1.092857156	1.568142731	-0.767246816	-0.902393588	-0.469675385	-0.944119285	-0.661717677	-1.757666049	0.696025208	1.068431117	2.345104662	0.842592259	1.105318189	0.954809756	1.48107362	1.156974916	1.044626445	0.300773842	-0.051108415	-0.140092436	0.636490883	0.286550499	-2.104600628	0.126347925	0.409646587	1.021399468	-1.301946185	-0.126347925	-0.402250065	-1.021399468	-0.112627241	-0.365586148	-0.409646587	1.862731867	-0.044289159	0.687372812	-0.037471962
GRMZM2G354696	1.946202375	-1.080563549	-0.09208509	1.240815502	1.697120332	0.611662814	-0.696025208	-0.571095686	-2.998020796	-0.223213218	1.368372038	0.862182757	0.230202032	0.571095686	0.394875486	0.547203211	0.43197323	-0.74010031	-2.645701413	-0.146974467	-0.462083086	0.286550499	-0.619896262	2.998020796	0.531447525	0.140092436	-0.064754379	-1.441453795	0.167663737	-0.785662535	-0.209267873	0.954809756	-0.439462999	-0.91267586	0.852346618	1.092857156	0.09208509	-1.009990169	0.153863466	-0.017029548	0.776421761	-0.804348643	-2.468001988	-2.345104662	0.133217035	0.492617885	-1.318010897	-1.032943298	-0.823319923
GRMZM2G120951	1.422465003	0.244213829	0.358313528	0.195363108	1.33442315	1.48107362	1.068431117	-2.998020796	-0.279460686	0.563095926	-2.645701413	-2.468001988	1.616536998	0.146974467	-2.171527717	-0.380190046	0.286550499	1.385954264	0.380190046	1.862731867	0.954809756	0.424507616	-0.003405752	0.852346618	-2.104600628	1.184000049	-0.030656506	0.003405752	-1.993601218	-1.946202375	-0.611662814	-1.902810954	-1.862731867	-0.704730028	-0.023842473	0.126347925	-0.037471962	0.315058297	0.402250065	-1.790524917	0.279460686	1.080563549	0.343824517	0.209267873	0.722302208	0.223213218	-1.757666049	-0.43197323	0.251237576
GRMZM2G017086	1.697120332	-0.279460686	-1.009990169	1.184000049	0.484942137	-0.595318735	0.587206217	-0.244213829	-2.998020796	1.902810954	1.080563549	0.794970891	0.713488578	-0.477294855	-1.184000049	1.385954264	0.209267873	0.003405752	-0.785662535	0.188425032	-0.862182757	-0.293654744	-1.642224543	0.023842473	0.251237576	-0.336607179	-0.892205847	-0.976525035	-0.587206217	0.696025208	0.380190046	0.923055543	0.174575701	-0.767246816	-0.174575701	0.265322712	0.387522319	-0.500322766	1.197842699	-0.713488578	0.678771572	-0.872103029	0.044289159	0.424507616	0.017029548	1.226239142	1.318010897	0.126347925	0.539308633
GRMZM2G337389	-0.587206217	0.6448541	0.852346618	1.545263217	0.500322766	-0.078412413	1.902810954	1.068431117	0.057930049	1.757666049	2.998020796	-0.119484771	-0.477294855	1.351202935	1.056453949	1.825439172	0.484942137	-0.539308633	-0.003405752	-0.595318735	0.547203211	-0.862182757	-0.057930049	-0.265322712	-0.902393588	0.882109877	-0.965610478	-0.105775004	0.003405752	-0.555132042	-2.468001988	-1.318010897	-0.687372812	-0.417065588	-1.117953259	0.842592259	0.394875486	0.595318735	-1.697120332	-0.051108415	0.35105981	-0.842592259	-0.336607179	0.424507616	-0.678771572	-0.230202032	0.085246759	-0.126347925	1.255660378
GRMZM2G028980	1.286210621	-0.017029548	0.6448541	-0.713488578	0.687372812	1.255660378	-0.852346618	-0.35105981	-0.085246759	-0.010217413	-0.446977502	0.372878156	1.301946185	-1.021399468	-1.056453949	-0.794970891	0.484942137	-0.343824517	-0.758136008	-0.477294855	0.74010031	1.092857156	-0.484942137	1.197842699	0.51582268	-0.071581727	0.167663737	-1.403975696	0.704730028	-0.223213218	0.300773842	0.944119285	0.181496015	-1.726602201	-0.044289159	0.813797671	-0.064754379	0.611662814	0.462083086	1.368372038	-0.954809756	1.068431117	-1.946202375	-1.48107362	-0.216235289	0.531447525	-1.501786817	-1.226239142	-1.240815502
GRMZM2G064799	0.322224522	-0.003405752	-0.085246759	1.591873889	0.696025208	0.731172307	1.501786817	-0.140092436	-2.468001988	1.422465003	0.265322712	0.636490883	2.468001988	0.017029548	0.794970891	-0.500322766	1.862731867	-0.508057465	0.003405752	0.365586148	-1.286210621	-0.064754379	-0.603470624	-0.469675385	1.105318189	-0.409646587	-0.661717677	-1.33442315	0.767246816	0.300773842	0.477294855	0.244213829	0.484942137	-0.704730028	0.7490877	0.678771572	0.286550499	-0.300773842	-1.902810954	0.603470624	-1.092857156	-1.385954264	-1.301946185	-1.105318189	-0.272384894	0.670220259	-0.365586148	0.195363108	0.628171949
GRMZM5G897926	1.862731867	-0.785662535	-0.7490877	1.270787244	0.409646587	0.998710851	-0.300773842	-0.098927729	-2.645701413	0.965610478	0.813797671	0.954809756	-0.446977502	0.892205847	1.642224543	0.539308633	1.993601218	0.329407333	-1.33442315	0.842592259	1.170380633	1.726602201	-1.501786817	0.628171949	0.6448541	1.616536998	0.365586148	-1.669043821	-0.078412413	-0.933535639	0.09208509	1.301946185	0.195363108	-0.954809756	0.446977502	1.130769373	0.595318735	0.731172307	-1.197842699	-0.153863466	-0.804348643	-0.91267586	-1.697120332	-0.923055543	0.402250065	0.279460686	-0.704730028	-0.387522319	-0.670220259
GRMZM2G088313	2.171527717	-1.009990169	-0.462083086	0.272384894	0.387522319	0.300773842	-2.104600628	-0.146974467	-2.249880663	1.825439172	-0.722302208	1.105318189	2.998020796	-1.226239142	-1.286210621	0.315058297	-0.085246759	0.030656506	0.595318735	0.010217413	-1.33442315	1.068431117	-0.933535639	0.653262666	-0.872103029	-0.003405752	0.976525035	0.343824517	0.628171949	-0.336607179	0.492617885	0.6448541	0.484942137	-1.642224543	0.181496015	0.160759774	-0.603470624	-0.776421761	0.35105981	0.237202109	-0.315058297	0.174575701	0.051108415	0.7490877	0.078412413	0.258273739	1.270787244	-1.092857156	0.469675385
GRMZM2G363715	-0.244213829	-0.944119285	-0.696025208	0.307908216	-0.098927729	2.249880663	1.156974916	-0.758136008	-2.468001988	0.216235289	-0.882109877	1.460977052	1.301946185	-0.279460686	-0.500322766	-0.813797671	1.726602201	1.403975696	-1.862731867	0.7490877	-1.351202935	-0.767246816	-2.171527717	-0.265322712	0.057930049	-0.195363108	-0.051108415	-1.501786817	0.439462999	-0.071581727	0.35105981	0.571095686	-0.010217413	-0.933535639	0.365586148	0.43197323	1.240815502	-1.032943298	-0.872103029	0.372878156	-0.462083086	-0.446977502	-0.315058297	-0.119484771	0.555132042	0.91267586	0.409646587	-0.417065588	0.167663737
GRMZM2G001451	1.726602201	0.003405752	1.240815502	-2.998020796	-0.300773842	-2.645701413	0.358313528	-0.358313528	0.611662814	1.616536998	-0.188425032	1.441453795	0.91267586	0.547203211	-0.112627241	-0.286550499	0.722302208	0.678771572	-2.468001988	0.813797671	1.757666049	1.422465003	0.051108415	0.944119285	-2.345104662	1.642224543	0.6448541	1.790524917	-2.171527717	0.174575701	1.009990169	0.661717677	0.064754379	0.43197323	0.230202032	-2.045954276	0.484942137	2.171527717	-0.010217413	0.571095686	-1.946202375	-1.902810954	-1.862731867	-1.825439172	-1.790524917	0.469675385	-1.757666049	-1.726602201	-1.697120332
GRMZM2G085587	-0.279460686	-0.687372812	-0.852346618	0.998710851	0.010217413	0.057930049	-0.160759774	-0.051108415	-2.345104662	-0.140092436	-1.117953259	1.368372038	-0.380190046	-0.823319923	-1.757666049	-1.616536998	0.237202109	0.731172307	1.021399468	-0.387522319	-1.545263217	-0.508057465	-1.902810954	-1.130769373	0.619896262	-1.33442315	-0.133217035	-0.628171949	-0.500322766	0.579132162	0.003405752	-0.216235289	-0.7490877	-1.568142731	-0.563095926	-0.547203211	1.184000049	-1.301946185	-1.48107362	0.43197323	0.402250065	-0.372878156	-1.946202375	-0.45451733	0.174575701	0.508057465	-0.704730028	1.105318189	-0.944119285
GRMZM2G102238	-0.023842473	0.003405752	0.417065588	-0.126347925	-0.153863466	-0.678771572	-0.251237576	-0.343824517	-1.368372038	0.571095686	-1.726602201	2.645701413	0.872103029	-1.044626445	-1.351202935	0.758136008	-0.492617885	-0.446977502	0.119484771	-0.462083086	-1.669043821	-1.33442315	-0.09208509	0.126347925	0.35105981	-1.197842699	-0.329407333	1.669043821	0.628171949	2.468001988	1.197842699	-0.571095686	1.318010897	-0.933535639	0.998710851	-0.670220259	0.09208509	1.351202935	-0.6448541	0.842592259	0.804348643	0.293654744	0.258273739	0.105775004	-0.862182757	1.009990169	1.286210621	1.184000049	2.345104662
GRMZM2G087196	0.272384894	-1.130769373	-0.35105981	0.057930049	0.181496015	1.368372038	-0.030656506	0.216235289	-2.645701413	0.424507616	-0.74010031	0.293654744	0.329407333	-0.462083086	-0.43197323	-0.017029548	1.351202935	1.48107362	-0.446977502	0.636490883	-1.368372038	0.555132042	-1.523165155	-0.628171949	0.998710851	-0.661717677	-0.078412413	-1.616536998	-0.329407333	0.492617885	0.731172307	1.184000049	0.023842473	1.545263217	-0.064754379	0.670220259	1.757666049	-1.726602201	-1.170380633	0.307908216	-0.307908216	-0.492617885	-0.380190046	-0.153863466	0.258273739	0.230202032	-0.687372812	-0.539308633	0.322224522
GRMZM2G133937	0.794970891	-0.823319923	0.265322712	0.387522319	0.933535639	1.184000049	-0.023842473	0.112627241	-2.998020796	0.380190046	0.417065588	0.603470624	0.315058297	-0.539308633	-0.944119285	-0.272384894	1.068431117	1.351202935	-1.301946185	0.636490883	0.322224522	0.976525035	-2.045954276	0.696025208	-0.872103029	-0.202310601	0.279460686	-1.902810954	-0.547203211	-0.704730028	0.372878156	0.402250065	-0.767246816	-0.571095686	0.923055543	1.862731867	1.009990169	-0.892205847	-0.167663737	0.272384894	-0.071581727	-0.6448541	-1.616536998	-1.170380633	0.146974467	-0.336607179	-1.669043821	-0.670220259	-1.368372038
GRMZM2G170602	1.032943298	0.387522319	0.813797671	0.954809756	0.722302208	1.33442315	1.726602201	0.085246759	1.523165155	2.171527717	-1.240815502	0.611662814	0.758136008	0.209267873	-0.244213829	-0.037471962	1.642224543	0.713488578	0.279460686	-0.010217413	-1.862731867	-0.279460686	-0.571095686	-0.965610478	-0.91267586	-0.678771572	0.010217413	0.785662535	1.286210621	1.105318189	-0.343824517	-0.112627241	-1.170380633	-1.726602201	-1.080563549	-0.722302208	1.368372038	-2.998020796	1.460977052	0.35105981	1.48107362	0.380190046	0.216235289	-0.731172307	-0.160759774	0.619896262	0.595318735	0.140092436	-1.616536998
GRMZM2G021706	-0.010217413	2.345104662	0.265322712	-0.293654744	-0.547203211	-0.343824517	1.301946185	-0.619896262	-2.998020796	-2.645701413	-0.119484771	0.251237576	1.726602201	-2.468001988	-2.345104662	-2.249880663	-0.244213829	1.616536998	0.085246759	0.462083086	0.823319923	0.057930049	-0.057930049	-0.704730028	0.842592259	-0.7490877	0.661717677	1.642224543	0.209267873	1.48107362	1.441453795	0.862182757	0.872103029	-0.678771572	-0.358313528	-0.202310601	0.133217035	0.358313528	0.336607179	0.293654744	-2.045954276	1.460977052	0.174575701	1.385954264	0.188425032	1.318010897	0.813797671	0.023842473	1.351202935
GRMZM5G845366	-0.237202109	0.402250065	1.403975696	-0.882109877	-0.670220259	0.380190046	0.258273739	1.044626445	-0.587206217	-0.146974467	-1.270787244	0.51582268	1.568142731	-0.43197323	-1.545263217	-2.045954276	0.251237576	-0.387522319	-0.010217413	-0.078412413	1.616536998	0.944119285	0.43197323	-0.439462999	0.209267873	-0.842592259	-1.056453949	-0.380190046	0.167663737	-0.91267586	0.571095686	-0.023842473	-0.492617885	-0.954809756	-0.678771572	0.862182757	-0.372878156	-1.092857156	1.318010897	0.976525035	-1.403975696	0.954809756	-1.669043821	-1.286210621	1.642224543	0.085246759	-1.422465003	0.023842473	-1.441453795
AC204953.3_FG002	-0.112627241	-2.998020796	0.023842473	1.184000049	-2.645701413	-2.468001988	0.823319923	-2.345104662	-2.171527717	-2.104600628	-2.045954276	0.43197323	2.998020796	-1.946202375	0.003405752	0.862182757	-1.902810954	-1.862731867	-1.825439172	0.653262666	-0.003405752	1.105318189	-1.790524917	-1.757666049	1.902810954	-0.119484771	0.237202109	1.143773961	1.726602201	-0.051108415	-1.726602201	0.51582268	2.249880663	-1.616536998	-0.133217035	0.09208509	-1.591873889	-1.545263217	1.032943298	0.579132162	0.307908216	-1.523165155	-1.501786817	0.216235289	1.460977052	2.468001988	-1.48107362	-1.460977052	1.068431117
GRMZM2G421899	2.468001988	-0.758136008	1.156974916	-0.216235289	-2.104600628	0.933535639	0.954809756	-0.409646587	-0.722302208	-0.315058297	-1.642224543	0.523619123	0.307908216	-0.195363108	-1.501786817	0.098927729	0.758136008	-0.230202032	-1.697120332	1.757666049	0.394875486	0.300773842	-0.003405752	-2.998020796	-0.794970891	-2.171527717	0.713488578	0.45451733	0.74010031	0.813797671	0.862182757	0.696025208	0.43197323	1.523165155	-0.687372812	-0.417065588	2.045954276	0.636490883	-0.300773842	1.946202375	-1.143773961	-1.368372038	-0.83291742	-0.976525035	-1.184000049	1.184000049	-0.965610478	-0.776421761	1.009990169
GRMZM2G079323	-0.813797671	1.117953259	0.619896262	-0.462083086	-0.293654744	0.010217413	1.422465003	-0.286550499	-0.998710851	0.387522319	-1.301946185	0.017029548	2.998020796	-0.003405752	-1.403975696	-0.944119285	-0.417065588	1.318010897	-1.226239142	0.767246816	0.098927729	-0.794970891	-0.300773842	-0.83291742	-0.112627241	-0.181496015	0.555132042	0.74010031	-1.385954264	1.184000049	0.477294855	-0.492617885	-1.616536998	-0.508057465	0.35105981	0.998710851	0.43197323	-0.244213829	2.468001988	-0.402250065	0.523619123	-0.279460686	-0.531447525	-0.687372812	-0.153863466	-0.571095686	-1.130769373	-0.51582268	-0.7490877
GRMZM2G002075	0.146974467	0.892205847	0.258273739	-0.35105981	0.636490883	0.010217413	-0.571095686	-1.862731867	-0.003405752	0.523619123	-0.91267586	1.460977052	-0.842592259	-0.167663737	-1.993601218	-0.539308633	-0.439462999	-0.279460686	1.170380633	-0.202310601	0.619896262	-0.244213829	0.976525035	0.402250065	0.329407333	0.030656506	-1.902810954	0.380190046	0.044289159	-1.092857156	-1.270787244	-1.368372038	-1.286210621	-1.403975696	-2.998020796	-0.813797671	0.394875486	-0.547203211	-0.329407333	0.500322766	-1.080563549	1.197842699	1.591873889	-1.441453795	0.758136008	0.051108415	-0.372878156	-0.160759774	-0.758136008
GRMZM2G138255	-1.184000049	0.678771572	0.085246759	-0.223213218	-1.170380633	-0.188425032	0.902393588	0.872103029	-0.105775004	0.030656506	-1.642224543	1.143773961	-0.539308633	0.195363108	-1.422465003	-1.48107362	-0.153863466	0.307908216	0.722302208	0.293654744	-0.678771572	-1.385954264	-0.372878156	-0.83291742	0.387522319	-1.946202375	-0.037471962	1.568142731	1.184000049	0.944119285	1.757666049	-0.329407333	0.462083086	-0.687372812	-1.197842699	0.064754379	-0.279460686	-0.409646587	0.611662814	1.642224543	-0.670220259	1.021399468	1.105318189	1.523165155	-0.731172307	0.216235289	0.492617885	-0.987557182	0.523619123
GRMZM2G095348	1.385954264	-0.09208509	-0.343824517	0.987557182	0.923055543	0.722302208	-0.469675385	0.098927729	-2.645701413	1.092857156	-0.696025208	1.044626445	0.160759774	0.037471962	-0.539308633	0.484942137	1.441453795	0.731172307	-1.403975696	1.523165155	-1.021399468	0.523619123	-2.468001988	1.197842699	-0.523619123	-0.587206217	0.563095926	-1.441453795	-0.230202032	-0.112627241	1.211918765	1.501786817	0.044289159	-1.143773961	0.872103029	1.460977052	0.300773842	-0.74010031	-0.571095686	0.402250065	-0.329407333	-0.133217035	-0.83291742	-0.892205847	0.126347925	0.380190046	-0.424507616	-0.446977502	-0.619896262
GRMZM2G026654	-0.603470624	0.619896262	-0.057930049	-1.301946185	0.628171949	-1.48107362	1.757666049	-0.547203211	-1.422465003	-0.098927729	-0.539308633	0.776421761	2.045954276	0.892205847	-0.628171949	0.477294855	0.322224522	-0.35105981	1.501786817	-0.105775004	-0.954809756	-0.923055543	-1.545263217	-0.579132162	-0.43197323	-1.105318189	-1.591873889	0.547203211	-1.170380633	0.722302208	-0.188425032	0.336607179	-0.902393588	-1.211918765	0.731172307	0.105775004	-0.531447525	0.09208509	2.468001988	0.804348643	-0.322224522	0.188425032	0.987557182	-1.080563549	0.51582268	1.946202375	0.7490877	1.032943298	-0.804348643
GRMZM5G860761	0.687372812	0.944119285	0.547203211	1.056453949	1.351202935	-1.403975696	-0.010217413	-1.616536998	0.785662535	-1.197842699	-0.555132042	0.329407333	0.380190046	0.43197323	1.591873889	-0.571095686	-1.460977052	-1.255660378	2.249880663	-0.923055543	0.272384894	-0.842592259	0.446977502	0.098927729	1.545263217	0.508057465	-1.642224543	-0.085246759	-1.902810954	-0.83291742	0.051108415	-0.933535639	-0.713488578	-1.092857156	-1.825439172	0.603470624	-1.170380633	0.469675385	2.468001988	-0.071581727	0.307908216	-0.484942137	-0.492617885	-0.051108415	-0.892205847	-0.064754379	0.862182757	0.653262666	0.293654744
GRMZM2G423315	-0.785662535	-0.057930049	-0.531447525	0.678771572	1.184000049	1.757666049	0.417065588	0.492617885	-0.892205847	0.758136008	1.669043821	-0.882109877	-0.044289159	0.83291742	-0.167663737	1.48107362	-0.244213829	1.044626445	0.579132162	0.133217035	0.653262666	-2.468001988	-0.023842473	-2.345104662	-0.43197323	1.240815502	-0.188425032	-0.508057465	-2.249880663	0.892205847	-0.315058297	0.51582268	-0.003405752	0.603470624	-0.446977502	-0.794970891	-0.579132162	-2.171527717	0.195363108	-0.017029548	1.697120332	-2.104600628	-2.045954276	-0.230202032	0.776421761	1.105318189	1.211918765	-0.731172307	-0.09208509
GRMZM2G127224	0.037471962	-1.286210621	-0.523619123	-0.258273739	-0.954809756	-0.923055543	1.825439172	-2.345104662	0.315058297	-0.998710851	0.83291742	-1.757666049	1.568142731	-0.057930049	-1.568142731	0.230202032	-0.140092436	0.044289159	-0.372878156	0.595318735	0.023842473	-0.696025208	-1.33442315	-0.387522319	0.998710851	-0.051108415	-0.064754379	0.611662814	-0.571095686	0.892205847	-0.003405752	-0.653262666	0.051108415	-0.424507616	-0.776421761	-1.790524917	0.307908216	-1.368372038	0.872103029	0.105775004	0.539308633	1.021399468	-0.202310601	0.469675385	1.48107362	1.460977052	0.286550499	2.468001988	0.882109877
AC212112.4_FG002	-0.653262666	-0.307908216	0.758136008	-0.119484771	-0.678771572	0.010217413	0.216235289	-0.595318735	-2.998020796	-0.785662535	-1.790524917	-0.484942137	0.531447525	0.140092436	-0.300773842	-0.823319923	0.322224522	-0.133217035	1.105318189	0.500322766	-0.085246759	-0.315058297	-1.642224543	-0.954809756	0.43197323	-0.181496015	-0.146974467	-0.670220259	-1.385954264	0.071581727	1.044626445	1.056453949	0.037471962	-0.91267586	-0.619896262	1.184000049	1.669043821	-0.017029548	-0.83291742	-0.244213829	-0.112627241	0.823319923	-1.270787244	-1.669043821	0.872103029	0.6448541	-0.044289159	-0.696025208	-0.023842473
GRMZM2G400352	0.023842473	-1.080563549	0.804348643	2.045954276	-1.184000049	-0.195363108	0.595318735	-0.571095686	-1.790524917	1.021399468	-0.687372812	0.439462999	1.642224543	-0.508057465	-1.422465003	0.387522319	-0.300773842	0.611662814	-0.998710851	1.197842699	-0.555132042	-0.785662535	-0.933535639	-1.156974916	1.523165155	-0.976525035	0.923055543	-0.882109877	-0.477294855	0.462083086	1.270787244	0.119484771	0.09208509	-0.713488578	0.902393588	0.628171949	-0.098927729	0.670220259	1.351202935	1.460977052	0.017029548	-0.329407333	-0.579132162	-0.279460686	-0.531447525	1.33442315	0.484942137	-0.6448541	-0.188425032
GRMZM2G109753	0.571095686	0.902393588	-0.571095686	-0.003405752	1.591873889	1.669043821	1.501786817	-0.882109877	-2.345104662	1.825439172	-0.653262666	0.987557182	-0.098927729	0.195363108	-0.628171949	-0.244213829	1.286210621	0.619896262	-0.380190046	0.83291742	-0.776421761	-0.265322712	-1.33442315	-0.704730028	0.636490883	-1.009990169	-0.167663737	0.078412413	0.45451733	0.603470624	1.143773961	0.023842473	-0.223213218	-0.064754379	-0.279460686	-0.209267873	-0.09208509	-0.085246759	-0.010217413	1.726602201	-1.270787244	-0.45451733	0.35105981	-1.080563549	0.794970891	1.240815502	2.045954276	0.037471962	0.230202032
GRMZM2G006505	2.249880663	-0.343824517	-1.301946185	0.336607179	1.211918765	-1.032943298	-0.174575701	-0.126347925	2.998020796	-1.33442315	0.119484771	0.523619123	-1.184000049	-1.170380633	-0.071581727	-0.119484771	0.202310601	-0.023842473	1.080563549	0.872103029	-0.140092436	-2.249880663	0.078412413	1.301946185	0.300773842	-0.160759774	0.628171949	-0.862182757	1.130769373	-1.255660378	-0.181496015	1.669043821	0.265322712	-1.501786817	-0.91267586	0.785662535	0.293654744	-1.757666049	-1.642224543	1.726602201	-0.09208509	-0.704730028	0.563095926	0.587206217	1.240815502	-0.51582268	-2.998020796	-0.653262666	0.030656506
[truncated: 248 more columns]
