# Supplementary material for: Verification of Three-Phase Dependency Analysis Bayesian Network Learning Method for Maize Carotenoid Gene Mining
Source: Biomed Res Int. 2017 Jul 30;2017:1813494. doi: 10.1155/2017/1813494 (PMC5554554; doi:10.1155/2017/1813494)
Supplement: Supplementary file 1 — The experiment data 1 of 109 nodes, the experiment data 2 of 109 nodes, and so on are shown here. [file 1813494.f1.zip › Supplementary material/Gene100_10.csv]

V1	V2	V3	V4	V5	V6	V7	V8	V9	V10	V11	V12	V13	V14	V15	V16	V17	V18	V19	V20	V21	V22	V23	V24	V25	V26	V27	V28	V29	V30	V31	V32	V33	V34	V35	V36	V37	V38	V39	V40	V41	V42	V43	V44	V45	V46	V47	V48	V49	V50
GRMZM5G868683	1.697120332	0.010217413	-0.112627241	1.184000049	0.579132162	-0.181496015	-1.197842699	-0.167663737	-2.998020796	1.669043821	-0.492617885	1.862731867	0.51582268	-0.653262666	0.209267873	0.037471962	-0.09208509	-0.500322766	1.170380633	0.595318735	-0.842592259	-0.965610478	-0.477294855	-0.146974467	-0.91267586	-0.003405752	-1.286210621	-1.032943298	-0.365586148	-0.424507616	0.523619123	1.441453795	-0.126347925	0.329407333	0.402250065	-0.017029548	1.044626445	-0.823319923	-0.372878156	1.385954264	-1.270787244	0.258273739	0.372878156	-0.195363108	0.661717677	1.422465003	-1.523165155	0.030656506	-0.539308633
GRMZM2G378452	0.492617885	-0.037471962	0.244213829	0.813797671	0.523619123	-0.078412413	0.653262666	-0.315058297	2.998020796	0.35105981	-0.587206217	0.872103029	1.286210621	-1.021399468	0.181496015	-0.119484771	-1.255660378	-0.998710851	-0.661717677	0.687372812	-2.345104662	-1.368372038	0.037471962	-0.484942137	-0.402250065	-0.813797671	0.140092436	1.422465003	0.057930049	1.545263217	0.417065588	-0.547203211	1.460977052	-1.902810954	-0.424507616	0.767246816	0.571095686	0.83291742	-0.258273739	0.343824517	-0.272384894	-0.380190046	2.249880663	1.351202935	1.156974916	0.387522319	-0.307908216	-0.6448541	0.902393588
GRMZM2G015648	0.579132162	0.813797671	-0.202310601	-0.587206217	1.422465003	-0.023842473	0.279460686	0.678771572	-0.696025208	-1.270787244	-0.523619123	1.368372038	-0.336607179	0.51582268	1.501786817	-0.167663737	-0.343824517	-0.244213829	0.539308633	-0.017029548	-0.794970891	-0.098927729	0.852346618	-0.237202109	1.032943298	-1.117953259	-0.462083086	0.329407333	-0.409646587	0.216235289	0.322224522	1.255660378	-0.823319923	-0.500322766	0.619896262	1.33442315	1.211918765	-0.722302208	-1.757666049	-1.021399468	-0.071581727	-0.105775004	-2.249880663	-2.045954276	-0.704730028	1.591873889	-0.417065588	0.085246759	0.842592259
GRMZM2G140755	1.368372038	-2.998020796	-2.645701413	0.085246759	0.258273739	-0.140092436	1.825439172	0.477294855	2.249880663	-0.230202032	0.010217413	0.417065588	0.794970891	0.722302208	0.628171949	-0.424507616	0.892205847	0.670220259	0.051108415	0.713488578	-0.251237576	-2.104600628	0.687372812	-0.037471962	0.181496015	0.230202032	0.064754379	0.09208509	0.286550499	0.531447525	-1.993601218	0.279460686	1.48107362	0.188425032	-1.946202375	0.976525035	0.603470624	-0.45451733	-0.078412413	-0.160759774	-1.902810954	-1.862731867	-1.825439172	-1.790524917	1.197842699	0.409646587	-0.279460686	-1.757666049	0.500322766
GRMZM2G151230	-2.998020796	1.993601218	-0.661717677	-0.923055543	-0.322224522	-0.892205847	0.595318735	-0.872103029	1.946202375	0.776421761	1.211918765	2.171527717	2.104600628	1.403975696	-0.933535639	-2.645701413	0.539308633	0.83291742	-2.468001988	-0.944119285	0.678771572	-0.636490883	0.704730028	0.140092436	-0.571095686	0.251237576	-0.704730028	0.619896262	0.336607179	1.902810954	1.021399468	0.804348643	0.813797671	0.085246759	0.258273739	-0.09208509	-2.345104662	0.987557182	-2.171527717	1.669043821	-2.104600628	-0.105775004	0.653262666	0.6448541	-0.188425032	-0.713488578	-0.085246759	0.160759774	0.051108415
GRMZM2G040887	1.862731867	1.056453949	-0.030656506	-1.117953259	-0.098927729	1.255660378	-0.492617885	-0.687372812	-2.998020796	2.345104662	-0.417065588	1.092857156	-0.307908216	0.43197323	-0.336607179	-0.508057465	0.678771572	-0.372878156	-1.170380633	0.244213829	-1.697120332	-0.484942137	-2.345104662	0.539308633	0.202310601	-0.611662814	-0.500322766	0.315058297	-0.704730028	1.032943298	1.946202375	0.653262666	-1.902810954	0.372878156	0.167663737	1.523165155	0.336607179	-0.023842473	-0.670220259	-0.195363108	-0.636490883	-1.286210621	0.140092436	0.508057465	0.251237576	0.307908216	-0.794970891	0.003405752	0.195363108
GRMZM2G092975	0.057930049	0.126347925	0.167663737	0.462083086	-0.372878156	-1.226239142	0.181496015	-0.6448541	-1.726602201	-0.017029548	-0.713488578	0.611662814	0.628171949	-0.329407333	-0.767246816	-0.571095686	-0.611662814	-0.595318735	0.484942137	-0.343824517	-0.587206217	-1.092857156	0.380190046	-0.315058297	-0.09208509	-0.794970891	-0.785662535	1.902810954	-1.032943298	1.044626445	0.223213218	0.051108415	1.255660378	-0.500322766	-0.153863466	0.315058297	-0.469675385	-0.258273739	0.842592259	1.105318189	-1.170380633	-0.523619123	1.117953259	0.293654744	-0.188425032	0.998710851	0.539308633	0.343824517	-0.078412413
GRMZM2G076563	-2.998020796	0.954809756	0.202310601	0.587206217	-2.645701413	-2.468001988	-0.051108415	-2.345104662	-2.104600628	-2.045954276	-1.993601218	0.146974467	-1.946202375	-1.902810954	-1.862731867	-1.825439172	-1.790524917	0.365586148	-1.757666049	1.441453795	0.387522319	-1.726602201	-1.697120332	0.307908216	-1.669043821	0.776421761	0.555132042	1.368372038	0.852346618	2.645701413	0.603470624	-0.119484771	1.301946185	-1.616536998	-1.591873889	-1.568142731	-1.545263217	1.48107362	-1.501786817	0.251237576	0.628171949	1.226239142	0.329407333	-1.48107362	0.767246816	-1.460977052	1.568142731	0.037471962	0.044289159
GRMZM2G042889	1.946202375	-0.237202109	-0.6448541	1.032943298	1.616536998	0.322224522	0.167663737	0.402250065	-2.998020796	1.143773961	0.181496015	2.645701413	0.965610478	-0.372878156	0.223213218	0.272384894	0.954809756	1.441453795	-1.501786817	1.105318189	0.6448541	0.704730028	-1.48107362	1.862731867	-0.112627241	0.051108415	-0.098927729	-1.697120332	-0.43197323	-0.670220259	-0.343824517	-0.140092436	-0.469675385	-0.902393588	0.678771572	1.226239142	0.293654744	-1.080563549	0.105775004	-0.300773842	-0.105775004	-0.336607179	-1.170380633	-1.044626445	0.508057465	-0.174575701	-1.156974916	-0.531447525	-0.944119285
GRMZM2G114702	0.017029548	1.021399468	0.713488578	0.954809756	1.068431117	0.653262666	0.153863466	-0.976525035	2.998020796	-0.380190046	0.146974467	0.804348643	0.358313528	1.056453949	0.547203211	-0.258273739	-0.579132162	-1.286210621	2.249880663	0.085246759	-1.501786817	-1.105318189	1.757666049	-0.071581727	1.441453795	-1.032943298	-0.43197323	1.726602201	0.555132042	0.523619123	0.402250065	0.126347925	0.307908216	0.336607179	-0.954809756	-0.017029548	-0.508057465	0.785662535	0.484942137	1.697120332	-1.825439172	-0.83291742	1.092857156	0.91267586	-0.119484771	0.892205847	-0.998710851	-2.345104662	0.439462999
GRMZM2G331154	2.345104662	0.202310601	1.080563549	0.286550499	-1.197842699	0.636490883	-0.696025208	-0.372878156	-2.345104662	-0.7490877	0.462083086	1.351202935	-1.270787244	-0.587206217	0.469675385	0.439462999	0.484942137	-0.547203211	-1.117953259	1.591873889	1.184000049	1.726602201	-0.003405752	-0.272384894	1.403975696	-0.017029548	0.74010031	-0.628171949	-0.902393588	0.862182757	1.422465003	1.240815502	1.009990169	-1.825439172	1.156974916	1.197842699	0.976525035	1.642224543	0.085246759	-0.223213218	-1.301946185	-0.140092436	-1.368372038	-0.704730028	-0.230202032	-0.91267586	-0.258273739	0.555132042	1.501786817
GRMZM2G001631	0.571095686	0.785662535	0.023842473	-0.265322712	-0.74010031	0.862182757	0.687372812	0.794970891	-2.998020796	1.669043821	0.037471962	1.385954264	1.117953259	0.547203211	-0.365586148	-0.852346618	1.862731867	1.545263217	-2.249880663	0.628171949	-1.523165155	0.722302208	-1.862731867	0.51582268	1.523165155	-1.021399468	0.044289159	-0.998710851	-0.085246759	0.823319923	0.731172307	0.064754379	1.501786817	-0.146974467	-0.628171949	-1.790524917	0.6448541	-1.226239142	2.345104662	-0.402250065	-0.300773842	-0.071581727	0.653262666	-0.469675385	1.422465003	0.636490883	-0.126347925	-0.078412413	0.661717677
GRMZM2G012126	0.307908216	0.595318735	0.696025208	0.112627241	-0.216235289	0.358313528	0.923055543	0.402250065	-1.726602201	-0.293654744	-1.351202935	-0.105775004	-0.071581727	1.568142731	0.687372812	-0.112627241	1.009990169	0.484942137	-0.462083086	-0.43197323	0.188425032	0.619896262	2.345104662	0.279460686	-0.119484771	0.09208509	-0.892205847	-0.387522319	-0.272384894	0.902393588	-1.591873889	-0.579132162	-0.174575701	-1.993601218	0.251237576	0.794970891	0.286550499	1.403975696	1.240815502	0.954809756	-2.345104662	-0.965610478	-2.171527717	-0.661717677	-0.7490877	-0.078412413	-1.697120332	-1.385954264	-0.767246816
GRMZM2G432075	1.197842699	-0.976525035	-1.197842699	0.804348643	0.767246816	1.240815502	-0.315058297	-0.35105981	-2.645701413	1.056453949	-0.307908216	0.83291742	-1.757666049	0.044289159	-0.611662814	-0.477294855	1.616536998	1.523165155	-1.862731867	-0.010217413	-1.616536998	0.037471962	-2.104600628	-0.237202109	0.216235289	0.140092436	0.307908216	-1.545263217	-0.45451733	0.322224522	1.993601218	0.862182757	-0.195363108	-0.402250065	-0.174575701	0.315058297	-0.83291742	-1.825439172	-0.987557182	0.563095926	-0.462083086	-1.385954264	0.944119285	0.153863466	-1.056453949	-0.230202032	-0.823319923	-0.380190046	0.531447525
GRMZM2G174739	0.51582268	1.156974916	0.636490883	-2.998020796	1.441453795	0.954809756	0.181496015	-2.645701413	-2.249880663	0.394875486	1.211918765	-2.171527717	-2.104600628	-0.037471962	0.365586148	-0.057930049	-1.946202375	1.032943298	-1.902810954	-1.862731867	-1.825439172	-0.119484771	0.160759774	0.539308633	-1.790524917	-0.153863466	0.35105981	0.6448541	0.477294855	-1.757666049	-1.726602201	0.563095926	-1.642224543	1.523165155	1.286210621	0.153863466	-1.591873889	-0.105775004	0.126347925	0.523619123	0.902393588	0.998710851	-1.545263217	-1.523165155	-1.501786817	2.345104662	0.003405752	0.265322712	-1.48107362
GRMZM2G041799	1.286210621	-1.044626445	-0.078412413	-0.322224522	0.696025208	1.642224543	-0.6448541	-0.329407333	-2.645701413	-0.140092436	-0.508057465	1.009990169	0.251237576	-1.184000049	-1.170380633	-0.882109877	0.230202032	0.09208509	0.446977502	0.687372812	-0.653262666	0.477294855	-1.48107362	0.83291742	0.272384894	-0.823319923	-0.35105981	-1.501786817	0.976525035	-0.954809756	1.270787244	-0.119484771	0.119484771	-0.696025208	0.670220259	0.484942137	-0.023842473	-0.51582268	-0.998710851	0.372878156	-0.83291742	-0.057930049	-1.669043821	-1.130769373	0.387522319	0.017029548	-1.255660378	-0.842592259	-0.767246816
GRMZM2G128160	-0.272384894	1.422465003	1.184000049	-0.852346618	-0.037471962	0.976525035	0.882109877	0.119484771	-2.468001988	0.030656506	-1.946202375	0.424507616	1.902810954	-0.336607179	0.071581727	-0.804348643	1.032943298	0.776421761	-0.223213218	0.336607179	1.545263217	0.209267873	-0.696025208	-0.531447525	0.477294855	-0.872103029	-0.636490883	0.223213218	-0.126347925	0.687372812	1.092857156	-0.7490877	0.051108415	-2.345104662	0.446977502	-0.329407333	-1.385954264	1.993601218	-0.003405752	0.439462999	-1.825439172	0.83291742	-0.51582268	-1.170380633	-0.500322766	1.226239142	-0.372878156	-0.998710851	-0.343824517
GRMZM2G043310	-2.104600628	1.351202935	0.619896262	-0.037471962	-0.358313528	-0.653262666	1.021399468	-0.547203211	0.078412413	0.882109877	-0.462083086	0.181496015	0.722302208	-0.731172307	-0.126347925	0.051108415	-1.270787244	0.251237576	1.092857156	-0.300773842	-0.611662814	-1.726602201	-0.181496015	-0.804348643	0.112627241	-0.539308633	-1.591873889	-0.387522319	-0.595318735	-0.636490883	-0.571095686	-0.794970891	0.477294855	-0.394875486	-0.603470624	0.653262666	-0.43197323	-0.010217413	1.056453949	0.508057465	-0.933535639	0.293654744	-1.422465003	-0.085246759	-0.051108415	-0.237202109	-0.071581727	1.757666049	0.365586148
GRMZM2G461793	0.500322766	-0.085246759	0.174575701	-0.611662814	0.579132162	0.387522319	0.307908216	-0.704730028	-2.468001988	0.044289159	0.153863466	-0.402250065	0.078412413	-0.315058297	-1.021399468	-0.160759774	0.380190046	0.872103029	-1.156974916	0.794970891	-0.944119285	0.160759774	-1.946202375	-1.441453795	0.251237576	0.636490883	0.146974467	-0.078412413	-0.987557182	1.318010897	0.237202109	0.661717677	0.469675385	-0.057930049	-0.017029548	1.156974916	1.240815502	0.43197323	-1.009990169	0.804348643	-0.064754379	0.112627241	1.385954264	-1.170380633	0.051108415	0.358313528	0.003405752	-0.923055543	0.987557182
GRMZM5G861357	-0.998710851	0.882109877	1.255660378	0.343824517	-0.030656506	-0.619896262	0.704730028	0.678771572	2.645701413	0.500322766	-0.902393588	0.6448541	2.468001988	-1.726602201	-1.032943298	-0.126347925	0.195363108	-1.056453949	0.872103029	-0.531447525	-0.804348643	-0.003405752	1.946202375	-0.852346618	-0.216235289	-0.7490877	-0.587206217	1.044626445	0.687372812	1.669043821	0.044289159	0.43197323	0.160759774	-1.48107362	-1.697120332	-0.230202032	-2.345104662	-0.862182757	-0.563095926	1.790524917	-2.998020796	-0.417065588	-1.351202935	0.417065588	1.032943298	1.385954264	-2.249880663	-2.171527717	-0.244213829
GRMZM2G701221	-0.653262666	-0.272384894	0.579132162	0.636490883	0.862182757	-0.842592259	0.902393588	-0.965610478	2.998020796	-0.336607179	0.279460686	-1.156974916	0.6448541	0.195363108	-0.636490883	-0.661717677	0.174575701	-0.83291742	-0.758136008	-1.33442315	-1.080563549	-0.678771572	0.402250065	-0.071581727	1.197842699	-0.619896262	-0.51582268	0.492617885	1.080563549	1.318010897	0.731172307	-0.112627241	0.230202032	-1.501786817	0.322224522	-0.462083086	-0.057930049	1.825439172	-1.825439172	0.842592259	-1.591873889	1.044626445	-0.43197323	0.439462999	1.240815502	1.143773961	-0.064754379	0.071581727	1.993601218
GRMZM5G896859	1.642224543	-0.078412413	0.91267586	0.446977502	0.636490883	1.790524917	-0.112627241	-0.7490877	0.987557182	-0.126347925	0.539308633	0.300773842	0.336607179	0.484942137	0.417065588	-1.130769373	1.825439172	0.146974467	1.130769373	1.669043821	-1.044626445	-0.628171949	-0.044289159	0.500322766	0.862182757	0.181496015	-0.160759774	1.726602201	0.7490877	-0.244213829	1.092857156	1.056453949	-0.010217413	-0.500322766	0.776421761	0.223213218	-0.417065588	-2.645701413	-0.998710851	0.555132042	-0.842592259	-0.653262666	-2.468001988	-2.345104662	-0.195363108	-1.068431117	-2.249880663	0.078412413	0.794970891
GRMZM5G886952	1.862731867	-0.446977502	-0.51582268	0.998710851	0.872103029	0.882109877	-0.892205847	0.251237576	-2.998020796	1.422465003	-0.119484771	0.078412413	-0.954809756	0.636490883	0.587206217	1.946202375	-0.085246759	-0.380190046	2.645701413	0.146974467	-0.758136008	0.944119285	-0.933535639	0.892205847	-0.813797671	-0.696025208	0.776421761	-2.045954276	-0.45451733	-1.902810954	-1.48107362	-0.619896262	-0.439462999	-1.184000049	1.591873889	-0.531447525	0.098927729	0.286550499	-0.687372812	-0.722302208	1.460977052	-0.678771572	-1.240815502	-1.117953259	-0.595318735	-1.044626445	0.477294855	-1.068431117	-1.156974916
GRMZM2G166639	1.226239142	1.170380633	1.255660378	-1.080563549	0.300773842	-0.785662535	-0.872103029	0.923055543	1.068431117	1.790524917	1.032943298	1.197842699	2.645701413	-2.045954276	-0.181496015	0.286550499	-0.105775004	0.965610478	0.188425032	-0.842592259	1.056453949	0.555132042	0.329407333	0.902393588	-1.255660378	-0.372878156	-2.998020796	0.794970891	0.160759774	1.993601218	-0.057930049	0.595318735	0.51582268	-1.021399468	0.216235289	-0.112627241	0.078412413	1.385954264	-0.852346618	-0.523619123	0.365586148	0.722302208	-0.044289159	-0.7490877	0.223213218	-1.441453795	-0.462083086	0.892205847	-2.645701413
GRMZM2G125853	1.757666049	2.249880663	0.258273739	0.153863466	-0.286550499	-0.619896262	0.293654744	-2.998020796	0.380190046	0.35105981	0.43197323	0.579132162	-2.645701413	0.387522319	-0.167663737	0.244213829	1.642224543	0.619896262	-2.468001988	1.993601218	0.216235289	-2.249880663	0.307908216	-1.092857156	1.318010897	-0.244213829	1.501786817	0.202310601	-1.170380633	-0.037471962	-2.171527717	1.403975696	0.279460686	0.057930049	1.211918765	-0.767246816	-1.032943298	-0.209267873	0.892205847	0.336607179	0.146974467	-0.571095686	0.976525035	0.223213218	-0.804348643	-2.104600628	1.301946185	-0.587206217	0.696025208
GRMZM2G006071	-0.417065588	1.642224543	-0.315058297	-1.156974916	-0.965610478	0.696025208	1.460977052	-0.619896262	0.098927729	-0.167663737	-0.776421761	1.184000049	1.862731867	-1.48107362	-1.568142731	-1.351202935	1.044626445	-0.902393588	-0.153863466	-0.976525035	0.336607179	-1.757666049	-0.933535639	-0.882109877	-0.813797671	-0.160759774	-0.678771572	-1.591873889	2.249880663	0.813797671	1.351202935	-0.987557182	-0.195363108	-0.477294855	0.322224522	0.492617885	0.539308633	-0.409646587	1.403975696	0.085246759	-1.143773961	0.902393588	0.343824517	0.195363108	1.255660378	0.611662814	-1.697120332	-0.722302208	0.603470624
GRMZM2G344499	0.74010031	2.171527717	-2.998020796	-0.45451733	0.167663737	1.255660378	0.140092436	-2.645701413	0.112627241	1.757666049	-0.500322766	-0.358313528	1.422465003	0.09208509	-0.462083086	-0.078412413	1.301946185	1.226239142	0.500322766	1.351202935	-2.468001988	-0.603470624	-0.91267586	-2.345104662	0.188425032	0.619896262	1.056453949	0.954809756	1.385954264	1.591873889	1.080563549	1.545263217	-2.249880663	-1.056453949	-1.156974916	-1.117953259	-0.987557182	-2.171527717	-0.722302208	0.119484771	-0.424507616	-2.104600628	-2.045954276	-1.993601218	-1.009990169	-1.946202375	-0.653262666	-0.112627241	-0.563095926
GRMZM2G165679	0.394875486	-0.523619123	0.329407333	-1.545263217	-0.944119285	0.044289159	0.696025208	0.322224522	-1.862731867	1.368372038	0.358313528	0.35105981	2.645701413	-0.539308633	-0.571095686	-0.611662814	0.587206217	0.160759774	2.345104662	-0.265322712	0.933535639	1.143773961	-1.032943298	0.804348643	-0.823319923	0.51582268	-0.146974467	0.687372812	-1.591873889	0.954809756	-0.394875486	0.823319923	1.044626445	0.023842473	1.184000049	0.965610478	0.409646587	1.33442315	1.080563549	1.545263217	-0.661717677	-0.315058297	0.300773842	-1.385954264	-0.424507616	-0.293654744	-0.998710851	0.237202109	-0.251237576
GRMZM2G080247	0.272384894	1.33442315	0.394875486	0.300773842	-0.7490877	-1.318010897	0.882109877	1.226239142	-0.140092436	0.998710851	1.351202935	2.468001988	2.998020796	-1.441453795	-1.422465003	-1.117953259	-0.126347925	0.704730028	2.104600628	-0.523619123	-0.394875486	-0.023842473	0.670220259	-1.056453949	0.492617885	-1.403975696	-0.767246816	-0.35105981	1.669043821	0.105775004	-0.595318735	-0.43197323	-0.619896262	-0.862182757	-0.439462999	0.181496015	-0.003405752	1.368372038	0.804348643	0.51582268	-0.976525035	0.202310601	-2.998020796	-1.545263217	-0.713488578	0.571095686	-0.105775004	0.469675385	0.387522319
GRMZM2G017426	0.293654744	-1.825439172	0.976525035	1.009990169	-0.098927729	-0.776421761	-2.171527717	-0.023842473	-0.343824517	-0.336607179	-0.547203211	1.726602201	0.804348643	-1.501786817	-0.758136008	-0.119484771	1.422465003	0.343824517	0.023842473	-0.500322766	-1.092857156	0.74010031	0.678771572	-0.731172307	1.170380633	-0.329407333	-0.636490883	-1.211918765	-0.492617885	-0.037471962	-0.307908216	0.329407333	0.539308633	-0.7490877	0.044289159	0.439462999	0.202310601	1.105318189	-0.265322712	0.965610478	-1.286210621	-0.017029548	0.244213829	0.195363108	0.417065588	-0.160759774	-0.322224522	-1.993601218	0.160759774
GRMZM2G110922	-1.902810954	0.892205847	0.188425032	-0.209267873	-0.636490883	0.265322712	1.825439172	0.603470624	-2.998020796	-1.211918765	-1.591873889	-1.862731867	-0.358313528	-0.126347925	-0.7490877	-0.372878156	0.044289159	1.270787244	0.343824517	1.197842699	-0.998710851	-0.628171949	-0.140092436	-0.51582268	0.037471962	-0.279460686	-0.017029548	0.35105981	0.251237576	0.954809756	0.813797671	0.555132042	-0.010217413	-0.307908216	-0.944119285	0.051108415	0.209267873	0.078412413	1.726602201	0.336607179	-0.571095686	0.523619123	1.523165155	0.571095686	0.085246759	0.862182757	-0.258273739	0.329407333	-0.794970891
GRMZM2G472671	-0.085246759	0.7490877	1.021399468	-2.998020796	0.216235289	-2.645701413	-0.010217413	1.318010897	2.645701413	-2.249880663	-2.171527717	-0.174575701	0.813797671	-2.104600628	1.080563549	0.119484771	-2.045954276	0.258273739	-1.993601218	1.170380633	-0.315058297	-1.902810954	-0.272384894	-0.244213829	-0.051108415	-0.119484771	-1.862731867	0.140092436	0.358313528	0.188425032	0.670220259	-0.153863466	0.555132042	0.265322712	-0.064754379	1.568142731	-1.726602201	2.249880663	-0.402250065	0.044289159	0.954809756	-1.669043821	-1.642224543	-0.35105981	0.469675385	1.33442315	-1.616536998	1.270787244	1.368372038
GRMZM2G081285	-2.998020796	1.021399468	0.767246816	-0.315058297	1.318010897	-2.645701413	0.336607179	-2.468001988	1.226239142	0.862182757	-0.563095926	-0.696025208	1.460977052	-2.171527717	-2.104600628	-0.776421761	-2.045954276	-0.603470624	-0.017029548	-0.704730028	-1.993601218	-1.946202375	1.697120332	-0.758136008	-1.902810954	0.500322766	-1.825439172	2.468001988	0.965610478	0.119484771	0.661717677	0.365586148	0.91267586	-1.757666049	0.439462999	-1.726602201	0.45451733	0.469675385	-0.329407333	0.892205847	-1.697120332	-0.571095686	0.146974467	-0.195363108	0.272384894	0.563095926	0.023842473	-1.669043821	-1.642224543
GRMZM2G177445	1.946202375	0.044289159	0.402250065	-0.653262666	0.547203211	1.170380633	1.117953259	-0.030656506	-1.642224543	-0.579132162	0.579132162	0.91267586	0.785662535	0.965610478	-0.539308633	-2.249880663	-0.037471962	0.153863466	-0.51582268	1.669043821	-0.882109877	-0.696025208	-0.704730028	0.704730028	0.823319923	-0.965610478	0.628171949	-1.351202935	0.105775004	-0.713488578	0.539308633	-0.998710851	0.424507616	-1.286210621	1.105318189	1.092857156	-0.216235289	-0.064754379	-0.195363108	0.181496015	-1.825439172	-0.923055543	1.044626445	-1.301946185	-0.237202109	0.882109877	0.223213218	0.603470624	0.933535639
GRMZM2G062683	1.790524917	1.130769373	1.669043821	-0.307908216	-0.923055543	-0.126347925	0.402250065	-0.181496015	-1.825439172	-1.669043821	0.140092436	1.616536998	-0.044289159	0.653262666	0.372878156	0.174575701	0.071581727	-0.140092436	1.105318189	1.33442315	-1.351202935	-0.892205847	0.51582268	-1.170380633	1.197842699	0.477294855	0.804348643	0.484942137	-0.439462999	0.167663737	0.83291742	0.767246816	-1.092857156	-0.51582268	-0.902393588	-0.687372812	-0.272384894	-0.603470624	-0.188425032	-0.696025208	-0.119484771	-0.571095686	-0.424507616	-0.823319923	-0.230202032	0.43197323	-0.965610478	-1.568142731	0.417065588
GRMZM2G129482	-1.385954264	-0.872103029	-0.462083086	0.402250065	2.249880663	0.628171949	1.568142731	-1.143773961	-2.998020796	1.545263217	0.003405752	-0.209267873	-1.240815502	-0.181496015	-1.825439172	-1.184000049	1.301946185	0.35105981	-1.757666049	-1.545263217	-1.697120332	-1.130769373	-0.372878156	0.987557182	-1.726602201	-0.852346618	-0.195363108	-1.523165155	-0.133217035	-0.965610478	-0.446977502	-0.804348643	-0.279460686	-0.892205847	1.170380633	-1.568142731	-1.368372038	-0.492617885	1.044626445	0.230202032	-0.167663737	0.91267586	2.045954276	1.130769373	0.439462999	-0.010217413	0.174575701	0.085246759	-0.794970891
GRMZM2G071307	-0.223213218	0.842592259	0.462083086	-0.09208509	1.403975696	-2.998020796	-0.343824517	-0.636490883	2.645701413	-2.645701413	0.394875486	0.35105981	-0.579132162	-0.933535639	0.307908216	0.555132042	-0.017029548	-0.037471962	1.105318189	-1.591873889	-1.568142731	-0.300773842	-1.403975696	0.237202109	-0.272384894	0.500322766	-0.998710851	0.653262666	-0.7490877	0.785662535	-0.902393588	0.085246759	0.731172307	-0.322224522	1.255660378	-0.003405752	-1.862731867	0.563095926	-0.140092436	0.010217413	-1.255660378	0.611662814	-0.230202032	1.092857156	0.126347925	1.211918765	-2.468001988	0.098927729	0.872103029
GRMZM2G125784	-0.944119285	-0.244213829	0.023842473	-0.071581727	-1.044626445	-0.767246816	0.704730028	-0.484942137	-0.329407333	-0.003405752	-0.300773842	-0.563095926	0.394875486	-0.051108415	-0.279460686	0.071581727	-0.35105981	-0.571095686	0.862182757	-0.044289159	-1.080563549	-0.439462999	1.545263217	-0.758136008	0.547203211	-1.068431117	-0.933535639	1.368372038	-0.09208509	1.726602201	0.823319923	0.74010031	1.092857156	1.790524917	-1.726602201	0.315058297	0.603470624	0.976525035	-0.611662814	0.767246816	-0.587206217	-0.965610478	0.402250065	-0.181496015	-1.032943298	1.032943298	0.678771572	1.170380633	0.336607179
GRMZM2G097340	0.037471962	-2.998020796	1.105318189	-0.244213829	0.670220259	-0.417065588	0.223213218	-2.645701413	2.998020796	-2.468001988	-2.345104662	-0.251237576	-2.249880663	0.998710851	-0.017029548	-0.35105981	1.197842699	-0.003405752	-2.104600628	0.424507616	-0.023842473	-2.045954276	-0.508057465	0.160759774	-1.993601218	-0.394875486	0.508057465	1.33442315	1.422465003	0.098927729	0.619896262	2.645701413	0.6448541	0.133217035	0.713488578	0.126347925	-1.902810954	-1.825439172	-1.790524917	2.171527717	-0.098927729	-1.757666049	-0.409646587	1.156974916	0.315058297	0.976525035	-1.726602201	-1.697120332	-1.669043821
GRMZM2G469224	0.387522319	0.882109877	0.785662535	0.758136008	0.329407333	0.195363108	0.722302208	-2.998020796	1.056453949	-0.09208509	-2.645701413	0.051108415	-0.010217413	-2.345104662	-0.758136008	-2.249880663	-0.417065588	1.009990169	-2.171527717	1.117953259	-0.251237576	-2.104600628	0.322224522	-2.045954276	-0.462083086	-0.678771572	0.336607179	1.642224543	-0.731172307	2.998020796	0.776421761	1.501786817	0.713488578	-0.628171949	0.251237576	-0.83291742	-0.587206217	0.45451733	-0.402250065	0.394875486	-1.902810954	0.6448541	1.044626445	0.628171949	0.944119285	2.645701413	0.372878156	0.492617885	0.265322712
GRMZM2G075513	-0.462083086	0.571095686	1.032943298	-0.402250065	0.010217413	-0.387522319	1.170380633	-1.156974916	2.249880663	-0.372878156	-0.785662535	-1.170380633	2.998020796	-0.74010031	-0.105775004	0.315058297	-1.197842699	-0.279460686	0.704730028	-0.531447525	-1.825439172	-1.642224543	0.492617885	-1.523165155	0.776421761	0.023842473	-0.174575701	1.255660378	0.661717677	0.862182757	-1.48107362	0.146974467	0.696025208	-1.669043821	0.882109877	-1.460977052	-0.160759774	0.258273739	1.197842699	1.021399468	0.105775004	1.501786817	-0.251237576	-0.767246816	1.422465003	0.933535639	-0.45451733	-0.230202032	0.424507616
GRMZM2G057136	-0.300773842	-0.603470624	0.272384894	-0.030656506	-1.226239142	0.140092436	0.902393588	0.064754379	2.045954276	0.944119285	-0.91267586	-0.776421761	-0.923055543	0.91267586	-0.882109877	-0.35105981	1.403975696	0.892205847	1.318010897	1.240815502	0.579132162	-2.998020796	-0.394875486	-2.645701413	-0.424507616	0.402250065	-0.336607179	0.209267873	-1.068431117	2.468001988	1.009990169	-0.265322712	-2.468001988	-0.153863466	-0.823319923	0.998710851	-2.249880663	-0.484942137	0.315058297	1.902810954	-0.174575701	-0.944119285	-2.171527717	-0.372878156	-0.209267873	0.258273739	-0.933535639	0.523619123	-2.104600628
GRMZM5G868868	2.171527717	0.188425032	-0.965610478	-0.804348643	0.531447525	1.056453949	0.6448541	1.184000049	-0.484942137	0.872103029	0.251237576	-2.998020796	0.387522319	-0.882109877	-0.307908216	0.402250065	0.365586148	0.619896262	1.068431117	1.105318189	0.500322766	-0.017029548	0.265322712	-1.105318189	-2.645701413	0.813797671	-0.112627241	-0.944119285	1.697120332	-0.140092436	-1.33442315	-0.852346618	0.098927729	-0.91267586	1.032943298	0.394875486	-0.146974467	1.226239142	-2.468001988	0.343824517	-0.813797671	-0.587206217	-2.345104662	-2.249880663	-1.143773961	0.595318735	-0.119484771	-0.794970891	-0.010217413
GRMZM2G317330	-1.117953259	-0.872103029	-0.329407333	-0.223213218	-0.6448541	-0.704730028	-0.628171949	0.619896262	0.51582268	-0.439462999	-0.343824517	-1.545263217	-0.842592259	-0.258273739	1.255660378	-1.255660378	0.587206217	-0.83291742	0.902393588	0.611662814	-2.249880663	-0.064754379	1.211918765	-1.044626445	1.080563549	-0.595318735	1.669043821	0.160759774	0.731172307	1.757666049	1.825439172	-0.003405752	1.270787244	0.74010031	-1.757666049	1.697120332	-0.469675385	1.117953259	-0.492617885	0.500322766	-0.852346618	-0.508057465	2.171527717	0.085246759	1.403975696	0.661717677	-1.184000049	0.804348643	-0.722302208
GRMZM5G897546	-0.722302208	0.195363108	0.508057465	0.307908216	-0.91267586	-0.237202109	1.021399468	0.704730028	-2.998020796	0.085246759	-1.946202375	0.539308633	2.104600628	-0.713488578	-1.211918765	-0.555132042	-1.044626445	0.776421761	-0.508057465	0.731172307	-0.315058297	-0.731172307	-1.021399468	-0.944119285	0.91267586	-1.726602201	-0.372878156	-0.265322712	0.315058297	1.156974916	1.105318189	-1.170380633	-0.051108415	-0.923055543	-0.078412413	1.044626445	0.071581727	-0.003405752	-0.417065588	-0.057930049	-1.422465003	0.852346618	-0.813797671	-0.696025208	1.301946185	1.068431117	0.017029548	0.051108415	0.758136008
GRMZM2G018885	-0.244213829	1.441453795	-0.678771572	0.83291742	-0.230202032	-0.595318735	-0.044289159	-0.365586148	-2.998020796	1.33442315	-0.140092436	1.616536998	1.351202935	-0.112627241	0.307908216	-0.424507616	-0.293654744	-0.767246816	2.171527717	-0.343824517	-0.842592259	-1.318010897	0.767246816	-0.153863466	-0.216235289	-1.545263217	-0.188425032	0.174575701	0.380190046	1.591873889	1.501786817	0.628171949	1.946202375	0.571095686	0.944119285	0.409646587	0.424507616	0.923055543	1.790524917	-0.010217413	-0.484942137	-0.372878156	-1.441453795	-1.946202375	-1.726602201	-0.91267586	0.469675385	-0.160759774	1.697120332
GRMZM2G319603	-2.998020796	-0.365586148	-0.500322766	0.998710851	0.892205847	-2.645701413	-0.181496015	1.184000049	-2.249880663	1.48107362	0.174575701	0.670220259	0.167663737	-0.293654744	1.422465003	-0.794970891	-0.402250065	0.216235289	-0.74010031	0.661717677	-2.104600628	-0.477294855	-2.045954276	-1.993601218	0.35105981	-0.037471962	2.645701413	2.045954276	0.722302208	0.424507616	-0.078412413	-0.43197323	-0.126347925	-1.862731867	-0.687372812	1.591873889	2.171527717	0.017029548	0.767246816	0.603470624	-0.696025208	-0.272384894	0.43197323	-1.825439172	0.823319923	0.91267586	1.270787244	0.696025208	-1.790524917
GRMZM2G449817	0.628171949	0.119484771	0.882109877	-0.244213829	-0.237202109	0.6448541	0.579132162	-0.902393588	1.726602201	0.105775004	-0.439462999	0.484942137	1.368372038	0.45451733	-0.7490877	-0.794970891	0.402250065	0.037471962	-0.484942137	-0.195363108	-1.669043821	0.272384894	0.872103029	0.030656506	-0.167663737	-0.731172307	-1.286210621	1.697120332	0.244213829	-0.579132162	-1.825439172	-0.823319923	-1.184000049	-1.143773961	1.460977052	0.057930049	1.105318189	-0.758136008	-0.329407333	0.944119285	-0.358313528	1.184000049	-2.249880663	0.492617885	0.91267586	1.351202935	-1.105318189	-0.696025208	-0.037471962
GRMZM2G135909	1.568142731	-0.343824517	1.993601218	0.307908216	-0.279460686	0.603470624	-1.044626445	0.523619123	-2.998020796	-1.156974916	-0.547203211	0.976525035	-0.823319923	0.272384894	0.105775004	0.051108415	1.092857156	-0.051108415	0.6448541	1.368372038	-0.119484771	1.757666049	-0.923055543	1.33442315	1.545263217	-0.322224522	0.670220259	-1.726602201	0.023842473	-0.954809756	0.322224522	0.003405752	0.51582268	-1.080563549	0.767246816	1.726602201	0.265322712	-0.670220259	-1.568142731	-0.023842473	-1.130769373	0.057930049	-1.422465003	-1.946202375	-0.439462999	-0.500322766	-0.74010031	-0.417065588	-1.48107362
GRMZM2G154496	-0.329407333	0.105775004	0.160759774	-2.998020796	-0.492617885	-0.45451733	0.223213218	-0.91267586	1.825439172	-1.117953259	-1.385954264	-0.944119285	-0.469675385	-0.112627241	-1.351202935	-1.211918765	1.523165155	0.424507616	-0.758136008	-0.954809756	-2.345104662	0.244213829	0.174575701	-1.697120332	-2.249880663	-0.998710851	-0.722302208	1.117953259	2.468001988	0.7490877	0.307908216	-0.477294855	-0.064754379	-1.009990169	0.358313528	0.300773842	-0.852346618	-0.539308633	0.704730028	0.071581727	-0.394875486	0.286550499	0.216235289	-0.767246816	0.579132162	0.611662814	0.653262666	-0.057930049	-0.188425032
GRMZM5G803419	-1.301946185	0.030656506	1.946202375	0.74010031	-0.119484771	-2.998020796	-1.286210621	0.842592259	-2.645701413	-1.092857156	-0.286550499	1.422465003	-0.030656506	-1.255660378	0.804348643	0.661717677	-2.345104662	-2.249880663	-2.171527717	0.619896262	-0.882109877	0.085246759	1.044626445	-0.265322712	1.568142731	-0.687372812	0.279460686	-0.872103029	-0.409646587	-0.216235289	0.044289159	-0.767246816	-0.823319923	1.591873889	0.195363108	2.998020796	0.365586148	1.197842699	0.017029548	0.315058297	0.696025208	-0.954809756	-0.153863466	-0.579132162	-0.003405752	0.336607179	-1.184000049	-2.104600628	0.387522319
GRMZM2G040209	1.301946185	-0.098927729	1.568142731	-0.862182757	0.469675385	0.6448541	0.209267873	0.492617885	-2.468001988	-0.358313528	-0.365586148	-0.523619123	1.009990169	-0.244213829	-0.09208509	0.064754379	-0.794970891	-1.642224543	0.293654744	-1.33442315	-1.301946185	0.300773842	1.240815502	0.872103029	0.611662814	-1.117953259	0.174575701	0.223213218	0.923055543	-0.044289159	2.045954276	1.270787244	0.704730028	-1.757666049	0.776421761	0.731172307	-0.492617885	-0.852346618	-0.587206217	0.500322766	-1.211918765	-0.636490883	-1.726602201	-1.351202935	-0.954809756	0.628171949	0.167663737	0.153863466	-1.226239142
GRMZM2G088980	0.372878156	1.726602201	1.523165155	0.030656506	-0.140092436	2.171527717	-0.477294855	-0.174575701	-0.322224522	-0.237202109	-0.358313528	0.174575701	1.669043821	1.825439172	0.010217413	-0.133217035	2.998020796	1.993601218	-2.998020796	-0.279460686	-2.468001988	-0.492617885	-2.345104662	2.045954276	-2.249880663	-0.167663737	-2.171527717	1.080563549	1.105318189	0.300773842	0.417065588	-2.104600628	0.237202109	-2.045954276	-1.993601218	-1.946202375	0.852346618	-1.902810954	0.45451733	0.636490883	0.987557182	1.130769373	-1.862731867	0.329407333	0.933535639	0.365586148	0.804348643	-0.09208509	-1.825439172
GRMZM2G365185	-0.133217035	-0.619896262	-0.286550499	0.017029548	0.336607179	0.258273739	-0.146974467	-0.417065588	-2.468001988	0.731172307	-0.477294855	0.687372812	1.197842699	-0.628171949	-0.523619123	-0.343824517	0.722302208	1.184000049	-1.568142731	0.409646587	0.216235289	1.080563549	-1.616536998	-0.402250065	-0.223213218	-0.023842473	-0.160759774	-1.697120332	-0.661717677	-0.394875486	0.813797671	0.804348643	-0.500322766	-0.51582268	0.140092436	2.345104662	1.902810954	-1.117953259	-0.167663737	0.35105981	0.003405752	0.188425032	-2.998020796	-1.255660378	0.531447525	-0.251237576	-0.91267586	-0.230202032	-0.704730028
GRMZM2G450939	0.872103029	0.687372812	-0.555132042	0.500322766	0.230202032	0.037471962	-2.998020796	-0.329407333	-2.468001988	0.944119285	-0.547203211	0.174575701	-0.704730028	-0.078412413	-0.387522319	0.794970891	-0.140092436	0.044289159	0.010217413	1.545263217	2.104600628	1.441453795	-0.687372812	-0.09208509	-0.477294855	1.197842699	-2.249880663	0.119484771	-0.300773842	0.417065588	0.446977502	0.555132042	-0.628171949	0.492617885	0.265322712	1.523165155	0.098927729	0.713488578	-0.35105981	-0.563095926	-0.852346618	-0.862182757	-0.45451733	-0.872103029	-0.286550499	-2.171527717	-0.258273739	0.74010031	0.322224522
GRMZM2G105192	0.322224522	0.051108415	-1.757666049	-0.160759774	-0.83291742	0.603470624	0.237202109	0.446977502	-2.249880663	0.071581727	-0.776421761	1.009990169	-0.09208509	0.547203211	-0.174575701	1.044626445	2.468001988	0.987557182	1.993601218	0.343824517	-1.368372038	-1.669043821	-1.068431117	-0.181496015	-1.105318189	-1.422465003	-0.678771572	-1.591873889	0.293654744	0.823319923	0.902393588	0.085246759	0.272384894	-0.794970891	-0.539308633	0.112627241	-0.43197323	-1.48107362	-0.064754379	-0.336607179	-0.842592259	0.571095686	-1.993601218	-1.902810954	0.882109877	0.45451733	-0.563095926	-0.216235289	-0.882109877
GRMZM2G341404	-0.794970891	0.424507616	1.032943298	0.882109877	0.653262666	-0.933535639	0.030656506	-0.767246816	-2.998020796	0.044289159	-0.619896262	1.255660378	1.902810954	-0.265322712	0.661717677	0.933535639	-1.068431117	-0.954809756	-0.91267586	0.45451733	1.080563549	0.628171949	-2.171527717	-0.923055543	-0.547203211	-1.255660378	1.545263217	1.156974916	-0.862182757	1.143773961	2.104600628	-0.272384894	0.902393588	-0.776421761	0.43197323	-0.300773842	0.687372812	0.678771572	0.579132162	0.892205847	0.244213829	1.184000049	0.923055543	-0.174575701	-1.009990169	0.619896262	0.195363108	0.603470624	0.174575701
GRMZM2G034868	0.571095686	-1.032943298	-1.270787244	0.944119285	0.492617885	0.547203211	-0.731172307	-0.417065588	-2.998020796	0.823319923	0.6448541	0.902393588	-1.044626445	-0.409646587	-0.653262666	-0.315058297	2.998020796	2.645701413	-1.642224543	1.902810954	1.368372038	0.133217035	-2.249880663	0.785662535	-0.923055543	1.301946185	-1.056453949	-1.993601218	-1.318010897	-0.892205847	0.244213829	0.424507616	-0.439462999	0.469675385	0.45451733	2.045954276	1.862731867	-0.057930049	-0.872103029	0.976525035	-0.500322766	-0.424507616	0.563095926	0.539308633	-0.678771572	-0.037471962	0.933535639	-0.223213218	-1.009990169
GRMZM2G047104	-0.636490883	-1.33442315	-0.492617885	1.545263217	1.616536998	-0.813797671	-0.251237576	0.636490883	-2.171527717	-1.669043821	0.181496015	0.153863466	-1.993601218	0.343824517	0.6448541	1.757666049	-0.365586148	-0.417065588	0.037471962	0.329407333	-0.307908216	0.216235289	-2.104600628	-0.181496015	-1.351202935	-0.469675385	-0.6448541	-1.130769373	-0.531447525	-0.237202109	0.7490877	0.823319923	-0.037471962	2.998020796	0.336607179	0.713488578	0.619896262	-1.068431117	-0.74010031	-1.211918765	1.441453795	-0.500322766	0.923055543	-0.823319923	-0.998710851	1.286210621	0.628171949	-0.279460686	0.251237576
GRMZM2G015703	1.545263217	0.112627241	1.143773961	0.998710851	-0.030656506	1.105318189	-0.704730028	-0.387522319	0.35105981	0.037471962	-0.492617885	1.184000049	0.547203211	-1.156974916	-0.160759774	-0.372878156	0.209267873	-0.09208509	0.010217413	0.954809756	-1.368372038	-0.439462999	1.616536998	1.068431117	0.119484771	-0.279460686	0.91267586	0.409646587	1.697120332	-1.441453795	-0.140092436	0.492617885	-0.174575701	-1.902810954	0.862182757	0.776421761	-0.202310601	-1.351202935	-0.003405752	1.368372038	-1.318010897	0.484942137	-2.468001988	-1.669043821	1.460977052	0.057930049	-1.616536998	-0.794970891	-0.477294855
GRMZM2G006080	0.933535639	0.251237576	0.987557182	-0.365586148	0.064754379	0.336607179	0.133217035	-0.010217413	0.611662814	0.776421761	0.202310601	0.944119285	2.171527717	-0.003405752	-0.402250065	0.365586148	0.758136008	-0.258273739	1.422465003	-0.785662535	-0.387522319	1.669043821	0.628171949	-0.758136008	0.387522319	-1.403975696	-1.48107362	-0.272384894	-0.119484771	-0.202310601	1.032943298	-0.852346618	-0.343824517	-0.380190046	0.842592259	0.160759774	-0.329407333	-0.446977502	0.329407333	0.322224522	-0.653262666	0.140092436	-2.045954276	-1.757666049	2.345104662	0.358313528	-2.998020796	0.112627241	-1.422465003
GRMZM2G072729	0.492617885	-0.188425032	0.216235289	-0.023842473	-0.343824517	-0.804348643	0.181496015	-0.492617885	2.998020796	-0.322224522	0.91267586	0.265322712	0.619896262	-0.064754379	0.661717677	-0.286550499	0.563095926	-0.611662814	-0.003405752	-0.653262666	-2.998020796	-0.195363108	1.902810954	0.044289159	-0.09208509	-0.402250065	-0.954809756	1.092857156	0.462083086	1.255660378	0.09208509	0.133217035	0.365586148	-0.244213829	-0.944119285	-0.140092436	-0.202310601	0.003405752	-0.83291742	0.279460686	-1.697120332	0.343824517	1.270787244	1.143773961	-0.105775004	0.892205847	0.758136008	1.009990169	0.051108415
GRMZM2G149587	-1.48107362	0.380190046	-0.547203211	-0.508057465	-1.790524917	-0.209267873	0.987557182	-1.697120332	-2.645701413	1.009990169	0.244213829	1.105318189	0.923055543	0.555132042	-0.258273739	-1.460977052	-0.030656506	0.7490877	0.167663737	0.547203211	-0.439462999	-0.83291742	-0.146974467	-0.603470624	-0.105775004	0.030656506	0.611662814	-0.6448541	0.45451733	0.74010031	-0.579132162	-0.636490883	0.272384894	-0.265322712	-0.064754379	0.678771572	2.171527717	0.017029548	-0.998710851	0.160759774	0.230202032	-0.696025208	0.696025208	1.726602201	1.422465003	0.998710851	-1.044626445	2.645701413	0.852346618
GRMZM2G033228	0.358313528	1.170380633	1.068431117	2.171527717	-0.776421761	-2.998020796	-0.209267873	-2.645701413	0.279460686	0.133217035	0.417065588	0.462083086	-0.6448541	0.003405752	-2.345104662	-2.249880663	-0.998710851	1.993601218	-2.171527717	0.195363108	-2.104600628	0.923055543	-0.484942137	-0.272384894	0.085246759	-0.057930049	-1.993601218	0.758136008	-0.531447525	0.965610478	0.987557182	-0.112627241	-0.010217413	-1.946202375	0.862182757	-0.492617885	0.230202032	0.336607179	-1.902810954	0.365586148	-1.862731867	0.998710851	0.704730028	0.064754379	0.293654744	1.184000049	-0.653262666	0.439462999	-0.704730028
GRMZM2G084717	-1.130769373	0.6448541	-0.146974467	-0.188425032	0.329407333	-1.993601218	0.112627241	-1.032943298	1.902810954	0.372878156	-0.603470624	1.105318189	2.171527717	-1.403975696	-0.933535639	0.017029548	0.085246759	0.731172307	0.882109877	-0.307908216	0.336607179	-0.439462999	-0.704730028	-0.882109877	0.587206217	-0.057930049	-0.343824517	1.48107362	0.307908216	2.345104662	0.43197323	-0.209267873	1.211918765	-2.468001988	-0.776421761	-0.477294855	-0.696025208	1.591873889	1.009990169	0.687372812	-0.43197323	0.446977502	0.804348643	0.91267586	1.032943298	1.368372038	-1.092857156	0.619896262	0.293654744
GRMZM2G154169	-1.946202375	-0.417065588	-0.322224522	-0.987557182	-0.595318735	0.563095926	0.508057465	-0.216235289	-1.33442315	-1.255660378	-2.045954276	-0.023842473	0.409646587	0.105775004	-1.105318189	-1.568142731	-0.195363108	-0.343824517	1.902810954	-0.776421761	0.595318735	-0.902393588	-0.010217413	-1.044626445	0.315058297	-0.842592259	-0.555132042	0.776421761	-0.424507616	0.174575701	0.731172307	-0.146974467	-1.286210621	-0.7490877	-1.757666049	-0.09208509	0.209267873	-0.003405752	0.244213829	-0.017029548	0.998710851	0.785662535	0.439462999	0.477294855	-0.030656506	0.119484771	-0.862182757	-0.230202032	0.417065588
GRMZM2G098800	1.422465003	0.882109877	1.021399468	-0.195363108	0.484942137	-0.329407333	-0.279460686	-1.117953259	1.993601218	-0.661717677	-0.112627241	0.244213829	1.032943298	0.133217035	-1.568142731	-1.211918765	-0.322224522	-0.954809756	-0.119484771	-0.35105981	-0.823319923	-0.492617885	1.825439172	0.653262666	1.270787244	-0.394875486	-0.017029548	2.645701413	0.722302208	0.329407333	0.579132162	0.126347925	0.078412413	-1.757666049	-0.181496015	0.43197323	0.336607179	0.315058297	-0.343824517	1.568142731	-2.045954276	0.085246759	-0.987557182	0.862182757	2.468001988	0.380190046	-0.43197323	0.45451733	-1.33442315
GRMZM2G126175	0.998710851	-0.030656506	-0.628171949	0.409646587	-0.500322766	-2.998020796	-0.492617885	0.43197323	-2.468001988	1.351202935	-0.153863466	1.697120332	0.251237576	-2.345104662	-0.365586148	-0.279460686	0.539308633	-2.249880663	-2.171527717	-2.104600628	-0.6448541	-0.023842473	-0.300773842	1.184000049	0.758136008	-0.555132042	0.823319923	-2.045954276	-0.057930049	0.286550499	-1.993601218	-0.892205847	0.653262666	0.336607179	-1.902810954	0.619896262	1.056453949	-0.51582268	-1.862731867	-1.825439172	-1.790524917	-0.722302208	-1.757666049	-0.133217035	-0.670220259	1.790524917	-0.244213829	0.661717677	-0.74010031
GRMZM2G141202	-1.156974916	-0.216235289	0.713488578	-1.523165155	-0.010217413	-1.286210621	0.579132162	0.030656506	-2.045954276	0.188425032	-1.211918765	1.184000049	-0.265322712	-1.422465003	-0.539308633	-1.130769373	0.500322766	0.003405752	-0.064754379	0.823319923	-1.902810954	-1.460977052	0.523619123	-1.056453949	-0.09208509	-1.143773961	-2.645701413	0.140092436	-0.126347925	0.628171949	0.343824517	-0.794970891	-0.336607179	-1.255660378	-0.343824517	-0.017029548	0.071581727	0.661717677	-0.223213218	1.726602201	-0.563095926	1.270787244	-0.892205847	0.687372812	0.105775004	2.104600628	0.43197323	-0.902393588	0.446977502
GRMZM2G016668	-0.417065588	0.272384894	0.892205847	0.595318735	-0.188425032	-0.862182757	0.794970891	0.174575701	0.044289159	-0.085246759	-1.351202935	0.051108415	2.998020796	-0.7490877	-1.092857156	1.056453949	0.611662814	1.211918765	1.669043821	0.322224522	0.017029548	0.387522319	-0.017029548	-0.83291742	-0.477294855	-0.636490883	-2.104600628	-0.446977502	1.403975696	0.209267873	-0.661717677	-0.492617885	0.776421761	-0.987557182	-0.776421761	0.74010031	-0.944119285	0.933535639	1.523165155	0.7490877	-0.678771572	0.279460686	0.372878156	-1.902810954	0.462083086	0.628171949	-0.563095926	-0.579132162	-0.365586148
GRMZM2G073628	0.492617885	-0.628171949	-0.944119285	0.402250065	0.91267586	0.286550499	0.722302208	0.181496015	2.468001988	-0.146974467	1.156974916	0.051108415	0.237202109	0.767246816	-0.307908216	1.591873889	-0.085246759	-0.91267586	2.645701413	0.380190046	0.265322712	0.611662814	0.105775004	0.661717677	0.933535639	0.064754379	-0.251237576	0.758136008	-1.825439172	1.790524917	1.021399468	0.7490877	-0.965610478	1.130769373	-1.422465003	0.272384894	-0.202310601	1.056453949	-1.270787244	1.240815502	0.446977502	-0.209267873	0.462083086	0.372878156	-0.300773842	1.117953259	-0.804348643	-0.555132042	-0.74010031
GRMZM2G395983	0.133217035	-0.661717677	0.998710851	1.946202375	-0.293654744	-1.697120332	0.43197323	-0.731172307	0.678771572	-1.032943298	-0.098927729	0.555132042	0.45451733	-1.156974916	0.500322766	0.258273739	-1.068431117	-1.790524917	0.785662535	0.202310601	-0.023842473	-0.279460686	1.226239142	0.293654744	1.726602201	1.044626445	0.902393588	1.825439172	0.336607179	1.48107362	-0.500322766	-0.307908216	1.211918765	0.492617885	-0.636490883	0.105775004	0.882109877	0.804348643	0.409646587	0.628171949	-0.09208509	-1.105318189	0.181496015	-0.064754379	-0.112627241	0.794970891	-0.794970891	0.424507616	1.523165155
GRMZM2G123410	-0.195363108	0.237202109	-0.628171949	-0.492617885	-0.372878156	-1.092857156	0.852346618	0.722302208	2.104600628	-0.484942137	0.933535639	-0.531447525	1.902810954	-0.286550499	1.092857156	1.184000049	1.068431117	-0.872103029	0.195363108	0.126347925	-1.211918765	-0.852346618	0.758136008	0.251237576	-1.568142731	0.767246816	-1.105318189	1.460977052	0.776421761	1.568142731	-1.616536998	-0.216235289	0.492617885	0.146974467	-0.603470624	-0.653262666	-0.45451733	2.645701413	-0.767246816	1.48107362	-0.785662535	-0.696025208	-0.300773842	0.322224522	0.619896262	-0.998710851	-0.687372812	-0.244213829	0.579132162
GRMZM2G078756	0.563095926	0.704730028	-1.523165155	0.954809756	0.343824517	-0.023842473	-0.181496015	-0.794970891	-2.998020796	0.619896262	-0.6448541	1.255660378	-0.315058297	0.424507616	-0.462083086	-0.713488578	0.469675385	-0.508057465	-0.670220259	0.202310601	-1.790524917	-0.078412413	-1.501786817	-0.09208509	0.842592259	-0.119484771	0.336607179	-1.460977052	-0.365586148	-0.105775004	0.902393588	0.813797671	1.697120332	0.579132162	0.286550499	0.776421761	0.365586148	0.767246816	-0.209267873	-0.195363108	-0.813797671	0.003405752	0.678771572	0.017029548	-0.051108415	1.902810954	0.794970891	-0.424507616	0.439462999
GRMZM2G420743	0.6448541	0.251237576	-1.946202375	1.009990169	-0.251237576	0.195363108	0.477294855	-0.687372812	2.998020796	0.923055543	-1.669043821	1.368372038	1.460977052	0.023842473	-1.286210621	1.669043821	0.078412413	0.037471962	1.545263217	0.731172307	0.098927729	0.153863466	-0.358313528	-1.757666049	-0.424507616	0.258273739	-0.146974467	1.143773961	1.211918765	0.678771572	-0.43197323	0.051108415	-1.545263217	-0.044289159	-0.417065588	-0.160759774	-0.508057465	-1.211918765	-0.547203211	0.823319923	-1.825439172	-1.270787244	-0.188425032	-0.776421761	-0.409646587	-0.713488578	-0.976525035	-0.678771572	0.119484771
GRMZM5G877647	-0.017029548	-1.032943298	-0.202310601	-0.563095926	0.010217413	-0.329407333	0.051108415	-0.933535639	2.645701413	-0.619896262	-0.852346618	-0.446977502	0.140092436	-1.642224543	-0.539308633	-1.368372038	-0.653262666	-0.45451733	-1.092857156	-0.272384894	-0.842592259	-0.251237576	0.105775004	-1.044626445	0.813797671	0.636490883	0.322224522	1.403975696	0.394875486	0.402250065	-1.591873889	-1.255660378	-0.09208509	0.954809756	-0.785662535	0.343824517	0.547203211	0.462083086	-1.318010897	-0.160759774	-2.045954276	-1.441453795	-0.731172307	-0.758136008	-0.037471962	-0.523619123	-1.117953259	-0.944119285	0.713488578
GRMZM2G071675	0.636490883	-0.74010031	-0.767246816	-0.595318735	-1.032943298	-0.35105981	-0.722302208	0.409646587	-2.998020796	0.670220259	0.030656506	0.279460686	-0.140092436	-0.872103029	-1.946202375	0.146974467	1.697120332	-0.523619123	-2.045954276	-0.446977502	-1.642224543	-0.687372812	-0.944119285	0.230202032	-0.555132042	0.078412413	-0.462083086	-1.301946185	0.09208509	-0.417065588	-0.044289159	0.181496015	-0.078412413	-1.460977052	0.704730028	-0.661717677	1.068431117	-0.933535639	-1.368372038	-0.071581727	-0.731172307	0.45451733	-0.030656506	0.010217413	0.017029548	-0.064754379	-1.318010897	-0.902393588	-0.230202032
GRMZM2G055437	0.064754379	-1.591873889	-0.315058297	0.300773842	0.439462999	1.33442315	-0.587206217	-0.439462999	-1.568142731	-0.223213218	-0.35105981	1.501786817	0.307908216	-0.944119285	0.469675385	-0.882109877	0.409646587	1.080563549	-2.345104662	1.460977052	-0.91267586	-0.713488578	-1.009990169	-0.140092436	-0.293654744	-0.085246759	1.993601218	-0.064754379	1.184000049	0.653262666	1.790524917	0.010217413	-0.195363108	-0.272384894	-0.017029548	2.998020796	0.251237576	-1.351202935	-0.611662814	0.286550499	-0.595318735	-1.130769373	-2.045954276	-2.998020796	-0.539308633	-0.547203211	-0.146974467	-0.336607179	0.508057465
GRMZM2G173700	1.351202935	-0.731172307	-1.255660378	0.167663737	0.776421761	0.804348643	-0.030656506	-0.209267873	-2.998020796	-0.105775004	-0.202310601	-0.003405752	-0.539308633	-0.571095686	-0.45451733	-0.35105981	1.726602201	1.226239142	-1.48107362	0.758136008	-0.365586148	0.852346618	-1.862731867	-0.140092436	-0.343824517	-0.272384894	1.568142731	-1.568142731	0.446977502	-0.133217035	-0.071581727	1.591873889	0.902393588	-0.315058297	0.611662814	0.998710851	1.301946185	-0.954809756	-0.43197323	-0.336607179	0.678771572	-0.372878156	0.244213829	0.6448541	0.078412413	-0.394875486	0.293654744	0.315058297	-0.010217413
GRMZM2G151811	0.842592259	0.146974467	-0.307908216	0.539308633	0.044289159	0.678771572	0.704730028	-1.255660378	1.545263217	0.051108415	-2.998020796	-0.35105981	2.998020796	0.882109877	0.508057465	0.078412413	-0.017029548	0.387522319	0.923055543	-0.704730028	1.130769373	-0.174575701	-0.126347925	-0.653262666	0.258273739	-0.842592259	-0.862182757	-0.286550499	0.813797671	0.343824517	-0.892205847	0.394875486	1.697120332	-1.105318189	-0.402250065	-0.329407333	-1.33442315	1.092857156	-0.462083086	0.628171949	-1.286210621	0.758136008	0.216235289	-0.387522319	-0.272384894	-1.368372038	-1.092857156	-1.130769373	-0.555132042
GRMZM2G168355	-1.460977052	-0.017029548	1.080563549	-0.678771572	-0.45451733	0.35105981	-0.030656506	-0.174575701	1.441453795	0.153863466	1.642224543	0.265322712	-0.387522319	-0.758136008	-1.790524917	-0.587206217	-0.944119285	-0.492617885	0.794970891	-0.343824517	-1.286210621	-1.422465003	-1.197842699	-0.595318735	-0.611662814	-1.33442315	-0.140092436	-1.403975696	-1.211918765	-0.687372812	-1.130769373	-1.616536998	-1.021399468	-1.862731867	0.044289159	-0.223213218	-1.946202375	-0.500322766	1.993601218	0.933535639	-0.044289159	1.902810954	0.804348643	-1.825439172	0.587206217	0.023842473	-0.105775004	-1.591873889	-1.056453949
GRMZM2G462417	1.240815502	-1.523165155	0.358313528	1.211918765	0.098927729	2.998020796	0.7490877	-0.670220259	-1.48107362	0.153863466	0.112627241	0.892205847	-0.508057465	-0.987557182	-0.188425032	0.409646587	0.965610478	0.265322712	-2.645701413	1.197842699	-1.669043821	1.226239142	-1.255660378	0.731172307	0.492617885	-0.611662814	1.080563549	-1.044626445	0.402250065	1.056453949	1.032943298	0.872103029	1.441453795	-0.804348643	0.051108415	0.387522319	-0.017029548	-0.365586148	-1.318010897	1.156974916	-1.184000049	-0.307908216	0.804348643	-1.351202935	-0.477294855	0.83291742	-1.757666049	-0.085246759	0.167663737
GRMZM2G053574	-0.500322766	1.460977052	-0.188425032	0.424507616	0.402250065	-0.003405752	0.579132162	-1.021399468	-2.998020796	0.813797671	-0.6448541	1.825439172	2.468001988	0.484942137	0.223213218	0.508057465	-1.318010897	-0.153863466	0.852346618	1.143773961	1.726602201	0.146974467	-1.993601218	0.119484771	-0.83291742	-1.422465003	-1.117953259	0.181496015	-0.202310601	0.872103029	1.501786817	-0.678771572	0.933535639	0.174575701	0.823319923	0.140092436	-0.687372812	0.307908216	1.441453795	0.842592259	0.417065588	-0.531447525	-0.037471962	-0.794970891	-0.044289159	1.130769373	1.642224543	0.202310601	0.098927729
AC203752.5_FG002	1.403975696	-0.595318735	-0.462083086	0.105775004	-0.293654744	0.051108415	-0.43197323	-0.7490877	-2.998020796	0.09208509	-0.167663737	-0.140092436	0.286550499	-0.500322766	-0.030656506	0.417065588	-0.35105981	0.35105981	-0.547203211	0.372878156	0.329407333	-0.587206217	-1.286210621	0.933535639	0.51582268	0.315058297	0.872103029	-1.33442315	-0.555132042	0.358313528	1.068431117	0.547203211	0.477294855	-1.032943298	0.678771572	2.249880663	1.156974916	0.174575701	0.078412413	0.244213829	0.230202032	0.83291742	-1.790524917	-1.092857156	1.441453795	0.731172307	-0.862182757	-1.143773961	-0.804348643
GRMZM2G132936	0.35105981	-0.181496015	0.258273739	1.092857156	-0.531447525	0.882109877	-0.500322766	-0.279460686	-2.998020796	2.104600628	-0.678771572	1.669043821	0.09208509	-0.998710851	-0.571095686	-0.804348643	0.315058297	0.998710851	-0.872103029	0.140092436	1.790524917	0.023842473	-2.171527717	-0.387522319	-1.032943298	-0.394875486	-0.7490877	-1.441453795	-0.555132042	-1.056453949	0.933535639	-0.078412413	-1.117953259	-0.017029548	0.209267873	1.056453949	0.965610478	-1.385954264	-0.085246759	-0.112627241	0.785662535	-0.105775004	-1.591873889	-0.965610478	-0.119484771	-0.547203211	-1.501786817	-0.776421761	-0.842592259
GRMZM2G080816	1.301946185	-0.336607179	0.258273739	0.209267873	0.539308633	0.794970891	0.35105981	-0.842592259	-1.056453949	-0.133217035	-0.174575701	-0.7490877	-0.6448541	-0.882109877	-0.976525035	-0.555132042	0.078412413	-0.547203211	0.286550499	0.758136008	-1.130769373	-0.954809756	2.998020796	0.181496015	1.697120332	0.010217413	0.872103029	0.563095926	0.965610478	0.439462999	0.555132042	0.387522319	1.669043821	-0.030656506	-0.057930049	1.068431117	-0.153863466	0.300773842	-1.032943298	1.318010897	-0.43197323	-1.460977052	-1.616536998	-2.171527717	-1.568142731	2.171527717	-1.170380633	1.056453949	1.403975696
GRMZM2G334660	0.037471962	1.48107362	-0.636490883	1.591873889	-0.017029548	0.704730028	0.83291742	-0.45451733	1.697120332	1.301946185	1.642224543	1.351202935	2.998020796	-0.078412413	0.933535639	-0.174575701	-0.071581727	0.653262666	0.587206217	-0.244213829	-0.279460686	-0.446977502	1.255660378	0.078412413	-0.365586148	-0.372878156	-1.211918765	0.813797671	-0.265322712	0.09208509	0.322224522	-1.184000049	-0.230202032	-0.852346618	1.032943298	-0.43197323	-1.197842699	1.757666049	-0.272384894	-0.188425032	-0.933535639	-1.021399468	-1.044626445	-0.603470624	-1.441453795	0.579132162	-0.758136008	-0.133217035	-0.670220259
GRMZM5G853305	-0.003405752	-0.195363108	-0.105775004	0.329407333	1.825439172	-0.209267873	0.358313528	0.7490877	-2.998020796	2.998020796	1.080563549	2.249880663	-0.343824517	0.216235289	0.315058297	0.933535639	-0.563095926	0.202310601	-0.722302208	0.823319923	0.731172307	-0.653262666	-2.345104662	-0.380190046	1.301946185	0.195363108	-0.237202109	-0.731172307	0.804348643	0.469675385	-1.156974916	-0.409646587	0.555132042	-0.181496015	0.51582268	0.300773842	1.068431117	0.279460686	-0.6448541	-0.133217035	1.117953259	-1.993601218	0.661717677	0.619896262	0.477294855	-0.322224522	-0.446977502	0.174575701	-0.661717677
GRMZM2G097078	1.092857156	-2.998020796	-2.645701413	-2.468001988	-0.372878156	-0.188425032	0.492617885	0.126347925	1.385954264	0.704730028	-0.085246759	-0.030656506	1.211918765	-0.329407333	-2.171527717	-2.104600628	-0.160759774	1.056453949	-2.045954276	0.417065588	1.143773961	0.387522319	0.563095926	-1.993601218	0.098927729	-0.146974467	0.167663737	0.003405752	0.74010031	-0.09208509	-0.322224522	0.804348643	0.202310601	2.171527717	0.539308633	-0.387522319	0.619896262	-1.825439172	-1.790524917	0.402250065	0.216235289	1.184000049	-1.757666049	0.508057465	1.422465003	-0.258273739	-0.293654744	-0.098927729	1.270787244
GRMZM5G856598	0.329407333	0.539308633	0.160759774	-0.030656506	1.240815502	0.965610478	-0.74010031	1.591873889	-2.998020796	1.642224543	-1.226239142	2.998020796	0.315058297	-1.009990169	-1.501786817	-0.402250065	0.387522319	-0.051108415	1.092857156	1.286210621	-0.508057465	0.153863466	-1.156974916	-0.322224522	-0.563095926	-1.591873889	-0.439462999	-0.611662814	0.09208509	0.258273739	1.301946185	0.595318735	0.758136008	-0.902393588	-0.555132042	1.790524917	-0.933535639	-0.965610478	-0.071581727	1.385954264	-1.726602201	0.037471962	-2.104600628	-0.944119285	-0.531447525	1.068431117	-1.255660378	-1.117953259	-0.603470624
GRMZM2G031628	-0.813797671	-1.044626445	0.687372812	1.255660378	-0.804348643	-1.021399468	-2.998020796	-0.424507616	-0.531447525	1.068431117	1.226239142	1.143773961	-0.902393588	-1.009990169	0.195363108	-0.794970891	1.523165155	1.616536998	0.965610478	-0.508057465	-0.696025208	-0.112627241	-1.032943298	0.462083086	-0.571095686	-0.704730028	-2.645701413	1.197842699	-1.240815502	-0.998710851	0.731172307	0.477294855	0.933535639	0.523619123	-0.823319923	-0.51582268	0.181496015	-0.83291742	-1.368372038	0.044289159	0.126347925	1.545263217	-1.226239142	-0.417065588	-0.181496015	-1.301946185	0.202310601	-0.687372812	0.078412413
GRMZM2G102000	1.270787244	-0.023842473	0.469675385	-0.167663737	0.402250065	1.143773961	-0.35105981	-0.244213829	-2.468001988	1.021399468	0.223213218	0.336607179	0.704730028	-0.477294855	0.6448541	0.823319923	0.51582268	-0.387522319	-0.611662814	0.439462999	-0.823319923	1.117953259	-2.171527717	0.944119285	0.322224522	-0.653262666	0.140092436	-1.318010897	0.188425032	-0.500322766	0.862182757	0.7490877	-0.322224522	-0.446977502	1.092857156	1.591873889	0.523619123	0.017029548	-0.160759774	0.112627241	-0.372878156	0.484942137	-1.697120332	-1.825439172	0.446977502	1.170380633	-1.33442315	-0.45451733	-1.184000049
GRMZM2G010494	2.345104662	0.687372812	-0.933535639	1.351202935	-1.184000049	-0.484942137	-1.33442315	1.48107362	-2.998020796	-0.91267586	1.240815502	2.104600628	0.976525035	-1.226239142	1.226239142	0.595318735	-0.439462999	-0.611662814	-1.642224543	-0.167663737	0.636490883	1.946202375	-2.104600628	2.468001988	-0.6448541	-1.255660378	-0.653262666	0.933535639	1.591873889	-0.010217413	0.119484771	0.767246816	0.329407333	-0.892205847	-0.713488578	-0.704730028	0.944119285	0.531447525	-1.156974916	0.619896262	-1.946202375	0.105775004	-0.09208509	-0.7490877	0.153863466	0.365586148	-0.112627241	0.954809756	1.056453949
GRMZM2G345667	-0.140092436	0.133217035	-0.696025208	0.365586148	-0.030656506	-1.501786817	-0.804348643	-0.51582268	-1.902810954	0.329407333	1.48107362	1.545263217	-0.300773842	-1.255660378	-1.080563549	0.258273739	-0.555132042	-0.595318735	1.697120332	0.126347925	-1.403975696	-1.669043821	-0.223213218	-0.126347925	-0.307908216	-0.7490877	-1.591873889	0.293654744	-0.174575701	1.862731867	2.345104662	0.687372812	-0.83291742	-2.345104662	-1.568142731	0.424507616	-0.010217413	0.51582268	0.098927729	0.670220259	-0.636490883	-0.713488578	2.645701413	0.998710851	0.484942137	0.446977502	-0.523619123	-0.293654744	-0.098927729
GRMZM2G383790	-0.7490877	-0.508057465	0.492617885	0.146974467	0.508057465	0.933535639	-0.057930049	-2.998020796	2.645701413	-2.645701413	-0.35105981	0.258273739	0.862182757	0.307908216	-2.468001988	-0.45451733	0.402250065	0.563095926	-2.345104662	1.156974916	0.293654744	-2.249880663	0.365586148	0.181496015	-0.523619123	-0.785662535	0.279460686	-0.579132162	2.345104662	0.500322766	-2.171527717	1.642224543	0.892205847	-0.365586148	0.776421761	-0.484942137	-0.307908216	-0.758136008	-2.045954276	1.460977052	-0.555132042	-0.402250065	-1.993601218	1.184000049	1.825439172	0.098927729	-1.946202375	-1.902810954	0.731172307
GRMZM2G134889	1.726602201	-1.441453795	0.555132042	-0.307908216	1.523165155	2.249880663	-0.380190046	-0.43197323	-2.998020796	2.645701413	0.804348643	-0.105775004	-0.051108415	0.394875486	1.184000049	0.923055543	1.301946185	-0.153863466	-0.010217413	-0.003405752	-0.387522319	1.33442315	-1.993601218	0.003405752	-0.35105981	-0.365586148	-0.057930049	-1.862731867	0.758136008	-1.591873889	-1.117953259	0.7490877	-0.74010031	-0.258273739	1.48107362	1.403975696	0.258273739	-1.105318189	-0.852346618	-0.044289159	0.933535639	-0.500322766	-1.790524917	-1.545263217	0.987557182	-0.469675385	0.619896262	-1.501786817	0.272384894
GRMZM2G044882	-0.230202032	-1.211918765	0.611662814	-0.998710851	-2.998020796	-0.424507616	0.146974467	-2.645701413	1.351202935	0.731172307	-0.500322766	-0.202310601	0.251237576	-2.468001988	0.293654744	-0.547203211	-0.636490883	-0.813797671	1.825439172	0.387522319	1.591873889	0.272384894	0.258273739	-0.017029548	-1.143773961	0.064754379	-0.279460686	0.933535639	1.056453949	-1.240815502	-0.661717677	0.409646587	0.09208509	-0.174575701	1.902810954	-1.044626445	-1.009990169	-1.130769373	-1.301946185	1.460977052	-0.098927729	-0.767246816	-2.171527717	-2.104600628	0.417065588	-0.35105981	-1.056453949	0.380190046	-0.785662535
GRMZM2G320827	-0.74010031	0.523619123	-0.678771572	0.023842473	-1.197842699	-1.616536998	0.195363108	-2.345104662	1.545263217	-1.318010897	-1.211918765	1.211918765	0.051108415	-0.804348643	-1.056453949	-0.653262666	-0.923055543	-1.642224543	-0.174575701	-0.987557182	-0.7490877	-2.045954276	-0.258273739	-0.882109877	0.35105981	-0.484942137	-1.044626445	1.790524917	1.092857156	0.237202109	0.358313528	0.462083086	1.523165155	-0.358313528	-0.587206217	0.112627241	-0.300773842	0.272384894	0.587206217	0.758136008	-1.184000049	-0.202310601	0.987557182	1.117953259	0.813797671	0.394875486	0.209267873	1.286210621	0.767246816
GRMZM2G047262	0.209267873	1.460977052	0.862182757	0.842592259	0.508057465	-2.998020796	1.197842699	-2.645701413	-2.468001988	-2.345104662	-2.249880663	0.776421761	-2.171527717	0.010217413	1.669043821	-1.993601218	-0.017029548	0.823319923	-1.946202375	1.591873889	-1.862731867	-1.825439172	0.603470624	0.023842473	-1.790524917	-1.757666049	-1.697120332	0.619896262	-1.669043821	1.642224543	2.345104662	0.661717677	-0.010217413	-1.568142731	0.126347925	1.184000049	-1.545263217	-1.501786817	1.441453795	0.954809756	1.351202935	-1.48107362	-1.460977052	-1.441453795	1.105318189	-1.422465003	0.372878156	0.300773842	1.757666049
GRMZM2G125544	-1.105318189	0.531447525	0.653262666	-0.539308633	0.098927729	-0.051108415	1.368372038	0.251237576	-2.645701413	0.35105981	-0.555132042	0.611662814	-0.767246816	0.469675385	-0.852346618	0.244213829	-0.202310601	0.965610478	1.501786817	-0.954809756	0.358313528	0.976525035	0.174575701	-0.722302208	-0.064754379	-0.531447525	-0.842592259	-0.237202109	0.071581727	1.301946185	1.211918765	-0.160759774	-0.300773842	-0.484942137	-0.687372812	0.279460686	0.794970891	1.143773961	0.45451733	-0.188425032	0.767246816	-0.74010031	-1.501786817	-1.697120332	-0.813797671	0.484942137	-1.226239142	-1.757666049	-0.902393588
[truncated: 248 more columns]
