# Supplementary material for: Verification of Three-Phase Dependency Analysis Bayesian Network Learning Method for Maize Carotenoid Gene Mining
Source: Biomed Res Int. 2017 Jul 30;2017:1813494. doi: 10.1155/2017/1813494 (PMC5554554; doi:10.1155/2017/1813494)
Supplement: Supplementary file 1 — The experiment data 1 of 109 nodes, the experiment data 2 of 109 nodes, and so on are shown here. [file 1813494.f1.zip › Supplementary material/TPDA-Interval.csv]

Thresholds	Discretization methods	Discretization value	Input	All the edge number	Time(s)	Number of edges about 5 component traits	Number of edges between 4 genes and 5 component traits	Ratio of other 100 genes	Ratio of 4 genes	Edges between 4 genes and 5 component
0.01 0.01 0.01	interval	8	D:\RST\Gene100_1.csv	611	54.78973333	34	6	p`= 0.28	P = 1.5	[ZEA,GRMZM2G152135] [LUT,GRMZM2G300348] [LUT,GRMZM2G012966] [Bcry,GRMZM2G152135] [BC,GRMZM2G012966] [BC,GRMZM2G152135]
0.01 0.01 0.01	interval	8	D:\RST\Gene100_2.csv	677	48.72768333	27	8	p`= 0.19	P = 2	[ZEA,GRMZM2G152135] [LUT,GRMZM2G300348] [LUT,GRMZM2G012966] [Bcry,GRMZM2G152135] [Bcry,GRMZM2G108457] [BC,GRMZM2G012966] [BC,GRMZM2G152135] [AC,GRMZM2G152135]
0.01 0.01 0.01	interval	8	D:\RST\Gene100_3.csv	647	42.93995	27	7	p`= 0.2	P = 1.75	[ZEA,GRMZM2G152135] [LUT,GRMZM2G300348] [LUT,GRMZM2G012966] [Bcry,GRMZM2G152135] [BC,GRMZM2G012966] [BC,GRMZM2G152135] [AC,GRMZM2G152135]
0.01 0.01 0.01	interval	8	D:\RST\Gene100_4.csv	774	50.6174	23	6	p`= 0.17	P = 1.5	[ZEA,GRMZM2G152135] [LUT,GRMZM2G300348] [GRMZM2G012966,LUT] [BC,GRMZM2G012966] [AC,GRMZM2G300348] [AC,GRMZM2G152135]
0.01 0.01 0.01	interval	8	D:\RST\Gene100_5.csv	685	47.22231667	25	7	p`= 0.18	P = 1.75	[ZEA,GRMZM2G152135] [LUT,GRMZM2G300348] [LUT,GRMZM2G012966] [Bcry,GRMZM2G152135] [BC,GRMZM2G012966] [BC,GRMZM2G152135] [AC,GRMZM2G152135]
0.01 0.01 0.01	interval	8	D:\RST\Gene100_6.csv	682	18.53861461	20	5	p`= 0.15	P = 1.25	[ZEA,GRMZM2G152135] [LUT,GRMZM2G300348] [LUT,GRMZM2G012966] [BC,GRMZM2G012966] [AC,GRMZM2G152135]
0.01 0.01 0.01	interval	8	D:\RST\Gene100_7.csv	753	22.1235079	27	7	p`= 0.2	P = 1.75	[ZEA,GRMZM2G152135] [LUT,GRMZM2G012966] [LUT,GRMZM2G300348] [Bcry,GRMZM2G152135] [Bcry,GRMZM2G108457] [BC,GRMZM2G012966] [BC,GRMZM2G152135]
0.01 0.01 0.01	interval	8	D:\RST\Gene100_8.csv	741	20.78410852	33	8	p`= 0.25	P = 2	[ZEA,GRMZM2G152135] [LUT,GRMZM2G012966] [LUT,GRMZM2G300348] [Bcry,GRMZM2G152135] [Bcry,GRMZM2G108457] [BC,GRMZM2G012966] [BC,GRMZM2G152135] [AC,GRMZM2G152135]
0.01 0.01 0.01	interval	8	D:\RST\Gene100_9.csv	647	21.41721038	19	4	p`= 0.15	P = 1	[ZEA,GRMZM2G152135] [LUT,GRMZM2G012966] [LUT,GRMZM2G300348] [BC,GRMZM2G012966]
0.01 0.01 0.01	interval	8	D:\RST\Gene100_10.csv	666	21.37799045	25	8	p`= 0.17	P = 2	[ZEA,GRMZM2G152135] [LUT,GRMZM2G012966] [LUT,GRMZM2G300348] [Bcry,GRMZM2G152135] [BC,GRMZM2G012966] [BC,GRMZM2G152135] [AC,GRMZM2G152135] [AC,GRMZM2G300348]
0.015 0.015 0.015	interval	8	D:\RST\Gene100_1.csv	404	31.6748	20	6	p`= 0.14	P = 1.5	[ZEA,GRMZM2G152135] [LUT,GRMZM2G300348] [LUT,GRMZM2G012966] [Bcry,GRMZM2G152135] [BC,GRMZM2G012966] [BC,GRMZM2G152135]
0.015 0.015 0.015	interval	8	D:\RST\Gene100_2.csv	451	33.48601667	19	7	p`= 0.12	P = 1.75	[ZEA,GRMZM2G152135] [LUT,GRMZM2G300348] [LUT,GRMZM2G012966] [Bcry,GRMZM2G152135] [BC,GRMZM2G012966] [BC,GRMZM2G152135] [AC,GRMZM2G152135]
0.015 0.015 0.015	interval	8	D:\RST\Gene100_3.csv	393	27.81646667	17	4	p`= 0.13	P = 1	[ZEA,GRMZM2G152135] [LUT,GRMZM2G300348] [LUT,GRMZM2G012966] [BC,GRMZM2G012966]
0.015 0.015 0.015	interval	8	D:\RST\Gene100_4.csv	498	33.21568333	14	4	p`= 0.1	P = 1	[ZEA,GRMZM2G152135] [LUT,GRMZM2G300348] [GRMZM2G012966,LUT] [BC,GRMZM2G012966]
0.015 0.015 0.015	interval	8	D:\RST\Gene100_5.csv	446	30.70838333	14	4	p`= 0.1	P = 1	[ZEA,GRMZM2G152135] [LUT,GRMZM2G300348] [LUT,GRMZM2G012966] [BC,GRMZM2G012966]
0.015 0.015 0.015	interval	8	D:\RST\Gene100_6.csv	459	12.75553832	13	4	p`= 0.09	P = 1	[ZEA,GRMZM2G152135] [LUT,GRMZM2G300348] [LUT,GRMZM2G012966] [BC,GRMZM2G012966]
0.015 0.015 0.015	interval	8	D:\RST\Gene100_7.csv	472	14.90134498	18	4	p`= 0.14	P = 1	[ZEA,GRMZM2G152135] [LUT,GRMZM2G012966] [LUT,GRMZM2G300348] [BC,GRMZM2G012966]
0.015 0.015 0.015	interval	8	D:\RST\Gene100_8.csv	476	13.96056928	17	7	p`= 0.1	P = 1.75	[ZEA,GRMZM2G152135] [LUT,GRMZM2G012966] [LUT,GRMZM2G300348] [Bcry,GRMZM2G152135] [BC,GRMZM2G012966] [BC,GRMZM2G152135] [AC,GRMZM2G152135]
0.015 0.015 0.015	interval	8	D:\RST\Gene100_9.csv	407	13.8030615	14	4	p`= 0.1	P = 1	[ZEA,GRMZM2G152135] [LUT,GRMZM2G012966] [LUT,GRMZM2G300348] [BC,GRMZM2G012966]
0.015 0.015 0.015	interval	8	D:\RST\Gene100_10.csv	440	13.85380243	13	4	p`= 0.09	P = 1	[ZEA,GRMZM2G152135] [LUT,GRMZM2G012966] [LUT,GRMZM2G300348] [BC,GRMZM2G012966]
0.02 0.02 0.02	interval	8	D:\RST\Gene100_1.csv	291	22.26676667	14	4	p`= 0.1	P = 1	[ZEA,GRMZM2G152135] [LUT,GRMZM2G300348] [LUT,GRMZM2G012966] [BC,GRMZM2G012966]
0.02 0.02 0.02	interval	8	D:\RST\Gene100_2.csv	315	23.98815	9	4	p`= 0.05	P = 1	[LUT,GRMZM2G300348] [LUT,GRMZM2G012966] [BC,GRMZM2G012966] [BC,GRMZM2G152135]
0.02 0.02 0.02	interval	8	D:\RST\Gene100_3.csv	284	19.30606666	12	4	p`= 0.08	P = 1	[LUT,GRMZM2G300348] [LUT,GRMZM2G012966] [Bcry,GRMZM2G152135] [BC,GRMZM2G012966]
0.02 0.02 0.02	interval	8	D:\RST\Gene100_4.csv	347	24.07686667	6	3	p`= 0.03	P = 0.75	[LUT,GRMZM2G300348] [GRMZM2G012966,LUT] [BC,GRMZM2G012966]
0.02 0.02 0.02	interval	8	D:\RST\Gene100_5.csv	316	21.03898333	8	2	p`= 0.06	P = 0.5	[LUT,GRMZM2G300348] [LUT,GRMZM2G012966]
0.02 0.02 0.02	interval	8	D:\RST\Gene100_6.csv	322	9.327915716	9	3	p`= 0.06	P = 0.75	[LUT,GRMZM2G300348] [LUT,GRMZM2G012966] [BC,GRMZM2G012966]
0.02 0.02 0.02	interval	8	D:\RST\Gene100_7.csv	339	9.948676749	12	3	p`= 0.09	P = 0.75	[LUT,GRMZM2G012966] [LUT,GRMZM2G300348] [BC,GRMZM2G012966]
0.02 0.02 0.02	interval	8	D:\RST\Gene100_8.csv	319	9.729448001	9	4	p`= 0.05	P = 1	[ZEA,GRMZM2G152135] [LUT,GRMZM2G012966] [LUT,GRMZM2G300348] [BC,GRMZM2G012966]
0.02 0.02 0.02	interval	8	D:\RST\Gene100_9.csv	279	10.31630677	9	4	p`= 0.05	P = 1	[LUT,GRMZM2G012966] [LUT,GRMZM2G300348] [Bcry,GRMZM2G152135] [BC,GRMZM2G012966]
0.02 0.02 0.02	interval	8	D:\RST\Gene100_10.csv	318	10.22553277	11	4	p`= 0.07	P = 1	[LUT,GRMZM2G012966] [LUT,GRMZM2G300348] [Bcry,GRMZM2G152135] [BC,GRMZM2G012966]
0.025 0.025 0.025	interval	8	D:\RST\Gene100_1.csv	221	16.15738333	9	3	p`= 0.06	P = 0.75	[LUT,GRMZM2G300348] [LUT,GRMZM2G012966] [BC,GRMZM2G012966]
0.025 0.025 0.025	interval	8	D:\RST\Gene100_2.csv	231	19.27926667	6	3	p`= 0.03	P = 0.75	[LUT,GRMZM2G300348] [LUT,GRMZM2G012966] [BC,GRMZM2G012966]
0.025 0.025 0.025	interval	8	D:\RST\Gene100_3.csv	206	14.46768334	8	3	p`= 0.05	P = 0.75	[LUT,GRMZM2G300348] [LUT,GRMZM2G012966] [BC,GRMZM2G012966]
0.025 0.025 0.025	interval	8	D:\RST\Gene100_4.csv	263	17.39795	7	3	p`= 0.04	P = 0.75	[LUT,GRMZM2G300348] [GRMZM2G012966,LUT] [BC,GRMZM2G012966]
0.025 0.025 0.025	interval	8	D:\RST\Gene100_5.csv	237	16.07858333	9	3	p`= 0.06	P = 0.75	[LUT,GRMZM2G300348] [LUT,GRMZM2G012966] [BC,GRMZM2G012966]
0.025 0.025 0.025	interval	8	D:\RST\Gene100_6.csv	235	6.7650623	8	3	p`= 0.05	P = 0.75	[LUT,GRMZM2G300348] [LUT,GRMZM2G012966] [BC,GRMZM2G012966]
0.025 0.025 0.025	interval	8	D:\RST\Gene100_7.csv	246	7.492228119	8	4	p`= 0.04	P = 1	[LUT,GRMZM2G012966] [LUT,GRMZM2G300348] [Bcry,GRMZM2G152135] [BC,GRMZM2G012966]
0.025 0.025 0.025	interval	8	D:\RST\Gene100_8.csv	232	7.375272985	7	3	p`= 0.04	P = 0.75	[LUT,GRMZM2G012966] [LUT,GRMZM2G300348] [BC,GRMZM2G012966]
0.025 0.025 0.025	interval	8	D:\RST\Gene100_9.csv	222	7.958479349	9	4	p`= 0.05	P = 1	[LUT,GRMZM2G012966] [LUT,GRMZM2G300348] [Bcry,GRMZM2G152135] [BC,GRMZM2G012966]
0.025 0.025 0.025	interval	8	D:\RST\Gene100_10.csv	244	7.443191099	10	4	p`= 0.06	P = 1	[LUT,GRMZM2G012966] [LUT,GRMZM2G300348] [Bcry,GRMZM2G152135] [BC,GRMZM2G012966]
0.02 0.01 0.01	interval	8	D:\RST\Gene100_1.csv	484	26.74733334	22	4	p`= 0.18	P = 1	[ZEA,GRMZM2G152135] [LUT,GRMZM2G300348] [LUT,GRMZM2G012966] [BC,GRMZM2G012966]
0.02 0.01 0.01	interval	8	D:\RST\Gene100_2.csv	533	29.83406667	15	5	p`= 0.1	P = 1.25	[ZEA,GRMZM2G152135] [LUT,GRMZM2G300348] [LUT,GRMZM2G012966] [BC,GRMZM2G012966] [BC,GRMZM2G152135]
0.02 0.01 0.01	interval	8	D:\RST\Gene100_3.csv	474	24.79015	20	4	p`= 0.16	P = 1	[ZEA,GRMZM2G152135] [LUT,GRMZM2G300348] [LUT,GRMZM2G012966] [BC,GRMZM2G012966]
0.02 0.01 0.01	interval	8	D:\RST\Gene100_4.csv	618	33.34681667	16	4	p`= 0.12	P = 1	[ZEA,GRMZM2G152135] [LUT,GRMZM2G300348] [GRMZM2G012966,LUT] [BC,GRMZM2G012966]
0.02 0.01 0.01	interval	8	D:\RST\Gene100_5.csv	499	27.03315	15	4	p`= 0.11	P = 1	[ZEA,GRMZM2G152135] [LUT,GRMZM2G300348] [LUT,GRMZM2G012966] [BC,GRMZM2G012966]
0.02 0.01 0.01	interval	8	D:\RST\Gene100_6.csv	537	10.35714018	12	4	p`= 0.08	P = 1	[ZEA,GRMZM2G152135] [LUT,GRMZM2G300348] [LUT,GRMZM2G012966] [BC,GRMZM2G012966]
0.02 0.01 0.01	interval	8	D:\RST\Gene100_7.csv	560	11.57603477	17	4	p`= 0.13	P = 1	[ZEA,GRMZM2G152135] [LUT,GRMZM2G012966] [LUT,GRMZM2G300348] [BC,GRMZM2G012966]
0.02 0.01 0.01	interval	8	D:\RST\Gene100_8.csv	578	10.97393172	18	5	p`= 0.13	P = 1.25	[ZEA,GRMZM2G152135] [LUT,GRMZM2G012966] [LUT,GRMZM2G300348] [BC,GRMZM2G012966] [AC,GRMZM2G152135]
0.02 0.01 0.01	interval	8	D:\RST\Gene100_9.csv	528	11.94333332	14	4	p`= 0.1	P = 1	[ZEA,GRMZM2G152135] [LUT,GRMZM2G012966] [LUT,GRMZM2G300348] [BC,GRMZM2G012966]
0.02 0.01 0.01	interval	8	D:\RST\Gene100_10.csv	533	11.50243293	15	5	p`= 0.1	P = 1.25	[ZEA,GRMZM2G152135] [LUT,GRMZM2G012966] [LUT,GRMZM2G300348] [BC,GRMZM2G012966] [AC,GRMZM2G152135]
0.01 0.01 0.01	interval	7	D:\RST\Gene100_1.csv	618	49.59591667	33	7	p`= 0.26	P = 1.75	[ZEA,GRMZM2G152135] [LUT,GRMZM2G300348] [LUT,GRMZM2G012966] [Bcry,GRMZM2G152135] [BC,GRMZM2G012966] [BC,GRMZM2G152135] [AC,GRMZM2G152135]
0.01 0.01 0.01	interval	7	D:\RST\Gene100_2.csv	709	50.9588	27	8	p`= 0.19	P = 2	[ZEA,GRMZM2G152135] [LUT,GRMZM2G300348] [LUT,GRMZM2G012966] [Bcry,GRMZM2G152135] [Bcry,GRMZM2G108457] [BC,GRMZM2G012966] [BC,GRMZM2G152135] [AC,GRMZM2G152135]
0.01 0.01 0.01	interval	7	D:\RST\Gene100_3.csv	654	46.27846667	25	5	p`= 0.2	P = 1.25	[ZEA,GRMZM2G152135] [LUT,GRMZM2G300348] [LUT,GRMZM2G012966] [BC,GRMZM2G012966] [AC,GRMZM2G152135]
0.01 0.01 0.01	interval	7	D:\RST\Gene100_4.csv	764	53.55031667	26	7	p`= 0.19	P = 1.75	[ZEA,GRMZM2G152135] [LUT,GRMZM2G300348] [GRMZM2G012966,LUT] [Bcry,GRMZM2G152135] [BC,GRMZM2G012966] [BC,GRMZM2G152135] [AC,GRMZM2G152135]
0.01 0.01 0.01	interval	7	D:\RST\Gene100_5.csv	699	50.04545	23	7	p`= 0.16	P = 1.75	[ZEA,GRMZM2G152135] [LUT,GRMZM2G300348] [LUT,GRMZM2G012966] [Bcry,GRMZM2G152135] [Bcry,GRMZM2G108457] [BC,GRMZM2G012966] [BC,GRMZM2G152135]
0.01 0.01 0.01	interval	7	D:\RST\Gene100_6.csv	713	19.39246787	23	7	p`= 0.16	P = 1.75	[ZEA,GRMZM2G152135] [LUT,GRMZM2G012966] [LUT,GRMZM2G300348] [Bcry,GRMZM2G152135] [BC,GRMZM2G012966] [BC,GRMZM2G152135] [AC,GRMZM2G152135]
0.01 0.01 0.01	interval	7	D:\RST\Gene100_7.csv	728	21.24068347	28	6	p`= 0.22	P = 1.5	[ZEA,GRMZM2G152135] [LUT,GRMZM2G300348] [LUT,GRMZM2G012966] [Bcry,GRMZM2G152135] [BC,GRMZM2G012966] [BC,GRMZM2G152135]
0.01 0.01 0.01	interval	7	D:\RST\Gene100_8.csv	753	21.38657581	31	8	p`= 0.23	P = 2	[ZEA,GRMZM2G152135] [LUT,GRMZM2G012966] [LUT,GRMZM2G300348] [Bcry,GRMZM2G152135] [Bcry,GRMZM2G108457] [BC,GRMZM2G012966] [BC,GRMZM2G152135] [AC,GRMZM2G152135]
0.01 0.01 0.01	interval	7	D:\RST\Gene100_9.csv	652	20.6001352	21	4	p`= 0.17	P = 1	[ZEA,GRMZM2G152135] [LUT,GRMZM2G012966] [LUT,GRMZM2G300348] [BC,GRMZM2G012966]
0.01 0.01 0.01	interval	7	D:\RST\Gene100_10.csv	674	20.31560198	23	8	p`= 0.15	P = 2	[ZEA,GRMZM2G152135] [LUT,GRMZM2G300348] [LUT,GRMZM2G012966] [Bcry,GRMZM2G152135] [BC,GRMZM2G012966] [BC,GRMZM2G152135] [AC,GRMZM2G152135] [AC,GRMZM2G300348]
0.015 0.015 0.015	interval	7	D:\RST\Gene100_1.csv	405	33.94035	17	6	p`= 0.11	P = 1.5	[ZEA,GRMZM2G152135] [LUT,GRMZM2G300348] [LUT,GRMZM2G012966] [Bcry,GRMZM2G152135] [BC,GRMZM2G012966] [BC,GRMZM2G152135]
0.015 0.015 0.015	interval	7	D:\RST\Gene100_2.csv	465	34.8832	19	7	p`= 0.12	P = 1.75	[ZEA,GRMZM2G152135] [LUT,GRMZM2G300348] [LUT,GRMZM2G012966] [Bcry,GRMZM2G152135] [BC,GRMZM2G012966] [BC,GRMZM2G152135] [AC,GRMZM2G152135]
0.015 0.015 0.015	interval	7	D:\RST\Gene100_3.csv	408	26.72035	18	4	p`= 0.14	P = 1	[ZEA,GRMZM2G152135] [LUT,GRMZM2G300348] [LUT,GRMZM2G012966] [BC,GRMZM2G012966]
0.015 0.015 0.015	interval	7	D:\RST\Gene100_4.csv	496	37.59375	17	5	p`= 0.12	P = 1.25	[ZEA,GRMZM2G152135] [LUT,GRMZM2G300348] [GRMZM2G012966,LUT] [BC,GRMZM2G012966] [AC,GRMZM2G152135]
0.015 0.015 0.015	interval	7	D:\RST\Gene100_5.csv	440	34.69163333	15	4	p`= 0.11	P = 1	[ZEA,GRMZM2G152135] [LUT,GRMZM2G300348] [LUT,GRMZM2G012966] [BC,GRMZM2G012966]
0.015 0.015 0.015	interval	7	D:\RST\Gene100_6.csv	462	12.9951446	11	4	p`= 0.07	P = 1	[ZEA,GRMZM2G152135] [LUT,GRMZM2G012966] [LUT,GRMZM2G300348] [BC,GRMZM2G012966]
0.015 0.015 0.015	interval	7	D:\RST\Gene100_7.csv	457	13.55636037	17	4	p`= 0.13	P = 1	[ZEA,GRMZM2G152135] [LUT,GRMZM2G300348] [LUT,GRMZM2G012966] [BC,GRMZM2G012966]
0.015 0.015 0.015	interval	7	D:\RST\Gene100_8.csv	476	13.92621155	18	7	p`= 0.11	P = 1.75	[ZEA,GRMZM2G152135] [LUT,GRMZM2G012966] [LUT,GRMZM2G300348] [Bcry,GRMZM2G152135] [BC,GRMZM2G012966] [BC,GRMZM2G152135] [AC,GRMZM2G152135]
0.015 0.015 0.015	interval	7	D:\RST\Gene100_9.csv	391	13.7036048	16	4	p`= 0.12	P = 1	[ZEA,GRMZM2G152135] [LUT,GRMZM2G012966] [LUT,GRMZM2G300348] [BC,GRMZM2G012966]
0.015 0.015 0.015	interval	7	D:\RST\Gene100_10.csv	452	13.56165268	13	5	p`= 0.08	P = 1.25	[ZEA,GRMZM2G152135] [LUT,GRMZM2G300348] [LUT,GRMZM2G012966] [BC,GRMZM2G012966] [AC,GRMZM2G152135]
0.02 0.02 0.02	interval	7	D:\RST\Gene100_1.csv	277	8.586933335	12	5	p`= 0.07	P = 1.25	[LUT,GRMZM2G300348] [LUT,GRMZM2G012966] [Bcry,GRMZM2G152135] [BC,GRMZM2G012966] [BC,GRMZM2G152135]
0.02 0.02 0.02	interval	7	D:\RST\Gene100_2.csv	326	9.457083337	11	5	p`= 0.06	P = 1.25	[LUT,GRMZM2G300348] [LUT,GRMZM2G012966] [Bcry,GRMZM2G152135] [BC,GRMZM2G012966] [BC,GRMZM2G152135]
0.02 0.02 0.02	interval	7	D:\RST\Gene100_3.csv	275	21.96555	11	2	p`= 0.09	P = 0.5	[LUT,GRMZM2G300348] [Bcry,GRMZM2G152135]
0.02 0.02 0.02	interval	7	D:\RST\Gene100_4.csv	344	32.53016667	8	4	p`= 0.04	P = 1	[LUT,GRMZM2G300348] [GRMZM2G012966,LUT] [Bcry,GRMZM2G152135] [BC,GRMZM2G012966]
0.02 0.02 0.02	interval	7	D:\RST\Gene100_5.csv	314	24.6927	12	3	p`= 0.09	P = 0.75	[LUT,GRMZM2G300348] [LUT,GRMZM2G012966] [BC,GRMZM2G012966]
0.02 0.02 0.02	interval	7	D:\RST\Gene100_6.csv	321	9.277172867	9	4	p`= 0.05	P = 1	[LUT,GRMZM2G012966] [LUT,GRMZM2G300348] [Bcry,GRMZM2G152135] [BC,GRMZM2G012966]
0.02 0.02 0.02	interval	7	D:\RST\Gene100_7.csv	333	9.880662219	13	3	p`= 0.1	P = 0.75	[LUT,GRMZM2G300348] [LUT,GRMZM2G012966] [BC,GRMZM2G012966]
0.02 0.02 0.02	interval	7	D:\RST\Gene100_8.csv	326	9.921863933	9	4	p`= 0.05	P = 1	[LUT,GRMZM2G012966] [LUT,GRMZM2G300348] [Bcry,GRMZM2G152135] [BC,GRMZM2G012966]
0.02 0.02 0.02	interval	7	D:\RST\Gene100_9.csv	276	9.894776416	9	3	p`= 0.06	P = 0.75	[LUT,GRMZM2G012966] [LUT,GRMZM2G300348] [BC,GRMZM2G012966]
0.02 0.02 0.02	interval	7	D:\RST\Gene100_10.csv	330	9.734622816	10	4	p`= 0.06	P = 1	[LUT,GRMZM2G300348] [LUT,GRMZM2G012966] [Bcry,GRMZM2G152135] [BC,GRMZM2G012966]
0.025 0.025 0.025	interval	7	D:\RST\Gene100_1.csv	208	15.43094167	10	3	p`= 0.07	P = 0.75	[LUT,GRMZM2G300348] [LUT,GRMZM2G012966] [BC,GRMZM2G012966]
0.025 0.025 0.025	interval	7	D:\RST\Gene100_2.csv	233	12.57603333	6	3	p`= 0.03	P = 0.75	[ZEA,GRMZM2G152135] [LUT,GRMZM2G300348] [LUT,GRMZM2G012966]
0.025 0.025 0.025	interval	7	D:\RST\Gene100_3.csv	205	7.946366668	7	3	p`= 0.04	P = 0.75	[LUT,GRMZM2G300348] [LUT,GRMZM2G012966] [BC,GRMZM2G012966]
0.025 0.025 0.025	interval	7	D:\RST\Gene100_4.csv	271	7.39495	8	4	p`= 0.04	P = 1	[LUT,GRMZM2G300348] [GRMZM2G012966,LUT] [Bcry,GRMZM2G152135] [BC,GRMZM2G012966]
0.025 0.025 0.025	interval	7	D:\RST\Gene100_5.csv	246	6.002683334	10	3	p`= 0.07	P = 0.75	[LUT,GRMZM2G300348] [LUT,GRMZM2G012966] [BC,GRMZM2G012966]
0.025 0.025 0.025	interval	7	D:\RST\Gene100_6.csv	231	6.899097868	7	3	p`= 0.04	P = 0.75	[LUT,GRMZM2G012966] [LUT,GRMZM2G300348] [Bcry,GRMZM2G152135]
0.025 0.025 0.025	interval	7	D:\RST\Gene100_7.csv	245	7.305592382	10	4	p`= 0.06	P = 1	[LUT,GRMZM2G300348] [LUT,GRMZM2G012966] [Bcry,GRMZM2G152135] [BC,GRMZM2G012966]
0.025 0.025 0.025	interval	7	D:\RST\Gene100_8.csv	238	7.505214417	7	3	p`= 0.04	P = 0.75	[LUT,GRMZM2G012966] [LUT,GRMZM2G300348] [BC,GRMZM2G012966]
0.025 0.025 0.025	interval	7	D:\RST\Gene100_9.csv	210	7.55041043	7	3	p`= 0.04	P = 0.75	[LUT,GRMZM2G012966] [LUT,GRMZM2G300348] [Bcry,GRMZM2G152135]
0.025 0.025 0.025	interval	7	D:\RST\Gene100_10.csv	249	7.305711699	6	3	p`= 0.03	P = 0.75	[LUT,GRMZM2G300348] [LUT,GRMZM2G012966] [BC,GRMZM2G012966]
0.02 0.01 0.01	interval	7	D:\RST\Gene100_1.csv	469	9.345833333	22	6	p`= 0.16	P = 1.5	[ZEA,GRMZM2G152135] [LUT,GRMZM2G300348] [LUT,GRMZM2G012966] [Bcry,GRMZM2G152135] [BC,GRMZM2G012966] [BC,GRMZM2G152135]
0.02 0.01 0.01	interval	7	D:\RST\Gene100_2.csv	543	10.21358333	18	6	p`= 0.12	P = 1.5	[ZEA,GRMZM2G152135] [LUT,GRMZM2G300348] [LUT,GRMZM2G012966] [Bcry,GRMZM2G152135] [BC,GRMZM2G012966] [BC,GRMZM2G152135]
0.02 0.01 0.01	interval	7	D:\RST\Gene100_3.csv	464	7.724000001	20	4	p`= 0.16	P = 1	[ZEA,GRMZM2G152135] [LUT,GRMZM2G300348] [LUT,GRMZM2G012966] [BC,GRMZM2G012966]
0.02 0.01 0.01	interval	7	D:\RST\Gene100_4.csv	622	10.43951666	16	4	p`= 0.12	P = 1	[ZEA,GRMZM2G152135] [LUT,GRMZM2G300348] [GRMZM2G012966,LUT] [BC,GRMZM2G012966]
0.02 0.01 0.01	interval	7	D:\RST\Gene100_5.csv	507	8.869733334	17	4	p`= 0.13	P = 1	[ZEA,GRMZM2G152135] [LUT,GRMZM2G300348] [LUT,GRMZM2G012966] [BC,GRMZM2G012966]
0.02 0.01 0.01	interval	7	D:\RST\Gene100_6.csv	548	10.91490262	14	4	p`= 0.1	P = 1	[ZEA,GRMZM2G152135] [LUT,GRMZM2G012966] [LUT,GRMZM2G300348] [BC,GRMZM2G012966]
0.02 0.01 0.01	interval	7	D:\RST\Gene100_7.csv	560	11.11327099	19	4	p`= 0.15	P = 1	[ZEA,GRMZM2G152135] [LUT,GRMZM2G300348] [LUT,GRMZM2G012966] [BC,GRMZM2G012966]
0.02 0.01 0.01	interval	7	D:\RST\Gene100_8.csv	577	11.59920552	16	4	p`= 0.12	P = 1	[ZEA,GRMZM2G152135] [LUT,GRMZM2G012966] [LUT,GRMZM2G300348] [BC,GRMZM2G012966]
0.02 0.01 0.01	interval	7	D:\RST\Gene100_9.csv	519	11.69549241	13	4	p`= 0.09	P = 1	[ZEA,GRMZM2G152135] [LUT,GRMZM2G012966] [LUT,GRMZM2G300348] [BC,GRMZM2G012966]
0.02 0.01 0.01	interval	7	D:\RST\Gene100_10.csv	553	11.38387402	15	4	p`= 0.11	P = 1	[ZEA,GRMZM2G152135] [LUT,GRMZM2G300348] [LUT,GRMZM2G012966] [BC,GRMZM2G012966]
0.01 0.01 0.01	interval	6	D:\RST\Gene100_1.csv	630	18.23515833	29	6	p`= 0.23	P = 1.5	[ZEA,GRMZM2G152135] [LUT,GRMZM2G300348] [LUT,GRMZM2G012966] [Bcry,GRMZM2G152135] [BC,GRMZM2G012966] [BC,GRMZM2G152135]
0.01 0.01 0.01	interval	6	D:\RST\Gene100_2.csv	682	18.05939167	26	8	p`= 0.18	P = 2	[ZEA,GRMZM2G152135] [LUT,GRMZM2G300348] [LUT,GRMZM2G012966] [Bcry,GRMZM2G152135] [Bcry,GRMZM2G108457] [BC,GRMZM2G012966] [BC,GRMZM2G152135] [AC,GRMZM2G152135]
0.01 0.01 0.01	interval	6	D:\RST\Gene100_3.csv	629	15.8273	26	6	p`= 0.2	P = 1.5	[ZEA,GRMZM2G152135] [LUT,GRMZM2G300348] [LUT,GRMZM2G012966] [BC,GRMZM2G012966] [AC,GRMZM2G300348] [AC,GRMZM2G152135]
0.01 0.01 0.01	interval	6	D:\RST\Gene100_4.csv	740	18.7873	23	6	p`= 0.17	P = 1.5	[ZEA,GRMZM2G152135] [LUT,GRMZM2G300348] [GRMZM2G012966,LUT] [Bcry,GRMZM2G152135] [BC,GRMZM2G012966] [BC,GRMZM2G152135]
0.01 0.01 0.01	interval	6	D:\RST\Gene100_5.csv	682	17.46121667	23	7	p`= 0.16	P = 1.75	[ZEA,GRMZM2G152135] [LUT,GRMZM2G012966] [LUT,GRMZM2G300348] [Bcry,GRMZM2G152135] [BC,GRMZM2G012966] [BC,GRMZM2G152135] [AC,GRMZM2G152135]
0.01 0.01 0.01	interval	6	D:\RST\Gene100_6.csv	696	18.8749118	24	5	p`= 0.19	P = 1.25	[ZEA,GRMZM2G152135] [LUT,GRMZM2G300348] [LUT,GRMZM2G012966] [BC,GRMZM2G012966] [AC,GRMZM2G152135]
0.01 0.01 0.01	interval	6	D:\RST\Gene100_7.csv	708	20.57618467	23	6	p`= 0.17	P = 1.5	[ZEA,GRMZM2G152135] [LUT,GRMZM2G012966] [LUT,GRMZM2G300348] [Bcry,GRMZM2G152135] [BC,GRMZM2G012966] [BC,GRMZM2G152135]
0.01 0.01 0.01	interval	6	D:\RST\Gene100_8.csv	750	20.68164062	32	7	p`= 0.25	P = 1.75	[ZEA,GRMZM2G152135] [LUT,GRMZM2G300348] [LUT,GRMZM2G012966] [Bcry,GRMZM2G152135] [BC,GRMZM2G012966] [BC,GRMZM2G152135] [AC,GRMZM2G152135]
0.01 0.01 0.01	interval	6	D:\RST\Gene100_9.csv	651	20.42785983	20	6	p`= 0.14	P = 1.5	[ZEA,GRMZM2G152135] [LUT,GRMZM2G012966] [LUT,GRMZM2G300348] [Bcry,GRMZM2G152135] [BC,GRMZM2G012966] [BC,GRMZM2G152135]
0.01 0.01 0.01	interval	6	D:\RST\Gene100_10.csv	656	19.6813731	23	7	p`= 0.16	P = 1.75	[ZEA,GRMZM2G152135] [LUT,GRMZM2G300348] [LUT,GRMZM2G012966] [Bcry,GRMZM2G152135] [BC,GRMZM2G012966] [BC,GRMZM2G152135] [AC,GRMZM2G152135]
0.015 0.015 0.015	interval	6	D:\RST\Gene100_1.csv	402	11.69208333	17	4	p`= 0.13	P = 1	[ZEA,GRMZM2G152135] [LUT,GRMZM2G300348] [LUT,GRMZM2G012966] [BC,GRMZM2G012966]
0.015 0.015 0.015	interval	6	D:\RST\Gene100_2.csv	449	12.26918333	15	6	p`= 0.09	P = 1.5	[ZEA,GRMZM2G152135] [LUT,GRMZM2G300348] [LUT,GRMZM2G012966] [Bcry,GRMZM2G152135] [BC,GRMZM2G012966] [BC,GRMZM2G152135]
0.015 0.015 0.015	interval	6	D:\RST\Gene100_3.csv	419	10.093225	19	4	p`= 0.15	P = 1	[ZEA,GRMZM2G152135] [LUT,GRMZM2G300348] [LUT,GRMZM2G012966] [BC,GRMZM2G012966]
0.015 0.015 0.015	interval	6	D:\RST\Gene100_4.csv	481	12.3172	11	4	p`= 0.07	P = 1	[ZEA,GRMZM2G152135] [LUT,GRMZM2G300348] [GRMZM2G012966,LUT] [BC,GRMZM2G012966]
0.015 0.015 0.015	interval	6	D:\RST\Gene100_5.csv	450	11.39658333	16	6	p`= 0.1	P = 1.5	[ZEA,GRMZM2G152135] [LUT,GRMZM2G012966] [LUT,GRMZM2G300348] [Bcry,GRMZM2G152135] [BC,GRMZM2G012966] [BC,GRMZM2G152135]
0.015 0.015 0.015	interval	6	D:\RST\Gene100_6.csv	465	13.13264707	12	4	p`= 0.08	P = 1	[ZEA,GRMZM2G152135] [LUT,GRMZM2G300348] [LUT,GRMZM2G012966] [BC,GRMZM2G012966]
0.015 0.015 0.015	interval	6	D:\RST\Gene100_7.csv	449	14.300446	14	4	p`= 0.1	P = 1	[ZEA,GRMZM2G152135] [LUT,GRMZM2G012966] [LUT,GRMZM2G300348] [BC,GRMZM2G012966]
0.015 0.015 0.015	interval	6	D:\RST\Gene100_8.csv	479	14.62583415	17	5	p`= 0.12	P = 1.25	[LUT,GRMZM2G300348] [LUT,GRMZM2G012966] [BC,GRMZM2G012966] [BC,GRMZM2G152135] [AC,GRMZM2G152135]
0.015 0.015 0.015	interval	6	D:\RST\Gene100_9.csv	389	14.07796995	13	4	p`= 0.09	P = 1	[ZEA,GRMZM2G152135] [LUT,GRMZM2G012966] [LUT,GRMZM2G300348] [BC,GRMZM2G012966]
0.015 0.015 0.015	interval	6	D:\RST\Gene100_10.csv	454	14.00946572	13	5	p`= 0.08	P = 1.25	[ZEA,GRMZM2G152135] [LUT,GRMZM2G300348] [LUT,GRMZM2G012966] [BC,GRMZM2G012966] [AC,GRMZM2G152135]
0.02 0.02 0.02	interval	6	D:\RST\Gene100_1.csv	283	8.076800001	11	3	p`= 0.08	P = 0.75	[LUT,GRMZM2G300348] [LUT,GRMZM2G012966] [BC,GRMZM2G012966]
0.02 0.02 0.02	interval	6	D:\RST\Gene100_2.csv	321	8.873216669	8	3	p`= 0.05	P = 0.75	[LUT,GRMZM2G300348] [LUT,GRMZM2G012966] [BC,GRMZM2G012966]
0.02 0.02 0.02	interval	6	D:\RST\Gene100_3.csv	279	6.908333333	12	4	p`= 0.08	P = 1	[LUT,GRMZM2G300348] [LUT,GRMZM2G012966] [Bcry,GRMZM2G152135] [BC,GRMZM2G012966]
0.02 0.02 0.02	interval	6	D:\RST\Gene100_4.csv	338	9.111616667	6	3	p`= 0.03	P = 0.75	[LUT,GRMZM2G300348] [GRMZM2G012966,LUT] [BC,GRMZM2G012966]
0.02 0.02 0.02	interval	6	D:\RST\Gene100_5.csv	327	7.575349998	11	3	p`= 0.08	P = 0.75	[LUT,GRMZM2G012966] [LUT,GRMZM2G300348] [BC,GRMZM2G012966]
0.02 0.02 0.02	interval	6	D:\RST\Gene100_6.csv	322	9.184575033	7	3	p`= 0.04	P = 0.75	[LUT,GRMZM2G300348] [LUT,GRMZM2G012966] [Bcry,GRMZM2G152135]
0.02 0.02 0.02	interval	6	D:\RST\Gene100_7.csv	340	9.493033218	12	3	p`= 0.09	P = 0.75	[LUT,GRMZM2G012966] [LUT,GRMZM2G300348] [BC,GRMZM2G012966]
0.02 0.02 0.02	interval	6	D:\RST\Gene100_8.csv	325	10.14968323	9	4	p`= 0.05	P = 1	[LUT,GRMZM2G300348] [LUT,GRMZM2G012966] [BC,GRMZM2G012966] [BC,GRMZM2G152135]
0.02 0.02 0.02	interval	6	D:\RST\Gene100_9.csv	278	9.782471899	8	3	p`= 0.05	P = 0.75	[LUT,GRMZM2G012966] [LUT,GRMZM2G300348] [BC,GRMZM2G012966]
0.02 0.02 0.02	interval	6	D:\RST\Gene100_10.csv	328	9.884850868	11	5	p`= 0.06	P = 1.25	[LUT,GRMZM2G300348] [LUT,GRMZM2G012966] [Bcry,GRMZM2G152135] [BC,GRMZM2G012966] [AC,GRMZM2G152135]
0.025 0.025 0.025	interval	6	D:\RST\Gene100_1.csv	213	5.97845	9	3	p`= 0.06	P = 0.75	[LUT,GRMZM2G300348] [LUT,GRMZM2G012966] [BC,GRMZM2G012966]
0.025 0.025 0.025	interval	6	D:\RST\Gene100_2.csv	239	6.86535	7	3	p`= 0.04	P = 0.75	[LUT,GRMZM2G300348] [LUT,GRMZM2G012966] [BC,GRMZM2G012966]
0.025 0.025 0.025	interval	6	D:\RST\Gene100_3.csv	198	4.882650002	7	3	p`= 0.04	P = 0.75	[LUT,GRMZM2G300348] [LUT,GRMZM2G012966] [BC,GRMZM2G012966]
0.025 0.025 0.025	interval	6	D:\RST\Gene100_4.csv	262	7.026216666	7	3	p`= 0.04	P = 0.75	[LUT,GRMZM2G300348] [GRMZM2G012966,LUT] [BC,GRMZM2G012966]
0.025 0.025 0.025	interval	6	D:\RST\Gene100_5.csv	237	5.609858334	7	3	p`= 0.04	P = 0.75	[LUT,GRMZM2G012966] [LUT,GRMZM2G300348] [BC,GRMZM2G012966]
0.025 0.025 0.025	interval	6	D:\RST\Gene100_6.csv	238	6.649917034	8	4	p`= 0.04	P = 1	[LUT,GRMZM2G300348] [LUT,GRMZM2G012966] [Bcry,GRMZM2G152135] [BC,GRMZM2G012966]
0.025 0.025 0.025	interval	6	D:\RST\Gene100_7.csv	246	6.797354551	7	3	p`= 0.04	P = 0.75	[LUT,GRMZM2G012966] [LUT,GRMZM2G300348] [BC,GRMZM2G012966]
0.025 0.025 0.025	interval	6	D:\RST\Gene100_8.csv	241	7.408582966	7	3	p`= 0.04	P = 0.75	[LUT,GRMZM2G300348] [LUT,GRMZM2G012966] [BC,GRMZM2G012966]
0.025 0.025 0.025	interval	6	D:\RST\Gene100_9.csv	218	7.497325051	9	4	p`= 0.05	P = 1	[ZEA,GRMZM2G152135] [LUT,GRMZM2G012966] [LUT,GRMZM2G300348] [BC,GRMZM2G012966]
0.025 0.025 0.025	interval	6	D:\RST\Gene100_10.csv	253	7.472506833	9	3	p`= 0.06	P = 0.75	[LUT,GRMZM2G300348] [LUT,GRMZM2G012966] [BC,GRMZM2G012966]
0.02 0.01 0.01	interval	6	D:\RST\Gene100_1.csv	476	9.219050002	17	4	p`= 0.13	P = 1	[ZEA,GRMZM2G152135] [LUT,GRMZM2G300348] [LUT,GRMZM2G012966] [BC,GRMZM2G012966]
0.02 0.01 0.01	interval	6	D:\RST\Gene100_2.csv	538	10.29606667	17	4	p`= 0.13	P = 1	[ZEA,GRMZM2G152135] [LUT,GRMZM2G300348] [LUT,GRMZM2G012966] [BC,GRMZM2G012966]
0.02 0.01 0.01	interval	6	D:\RST\Gene100_3.csv	451	7.767975001	19	4	p`= 0.15	P = 1	[ZEA,GRMZM2G152135] [LUT,GRMZM2G300348] [LUT,GRMZM2G012966] [BC,GRMZM2G012966]
0.02 0.01 0.01	interval	6	D:\RST\Gene100_4.csv	615	10.59228333	18	4	p`= 0.14	P = 1	[ZEA,GRMZM2G152135] [LUT,GRMZM2G300348] [GRMZM2G012966,LUT] [BC,GRMZM2G012966]
0.02 0.01 0.01	interval	6	D:\RST\Gene100_5.csv	506	8.562633332	16	4	p`= 0.12	P = 1	[ZEA,GRMZM2G152135] [LUT,GRMZM2G012966] [LUT,GRMZM2G300348] [BC,GRMZM2G012966]
0.02 0.01 0.01	interval	6	D:\RST\Gene100_6.csv	523	10.20869818	12	4	p`= 0.08	P = 1	[ZEA,GRMZM2G152135] [LUT,GRMZM2G300348] [LUT,GRMZM2G012966] [BC,GRMZM2G012966]
0.02 0.01 0.01	interval	6	D:\RST\Gene100_7.csv	543	11.33348248	17	4	p`= 0.13	P = 1	[ZEA,GRMZM2G152135] [LUT,GRMZM2G012966] [LUT,GRMZM2G300348] [BC,GRMZM2G012966]
0.02 0.01 0.01	interval	6	D:\RST\Gene100_8.csv	583	11.39764758	20	6	p`= 0.14	P = 1.5	[ZEA,GRMZM2G152135] [LUT,GRMZM2G300348] [LUT,GRMZM2G012966] [BC,GRMZM2G012966] [BC,GRMZM2G152135] [AC,GRMZM2G152135]
0.02 0.01 0.01	interval	6	D:\RST\Gene100_9.csv	527	11.7293057	15	4	p`= 0.11	P = 1	[ZEA,GRMZM2G152135] [LUT,GRMZM2G012966] [LUT,GRMZM2G300348] [BC,GRMZM2G012966]
0.02 0.01 0.01	interval	6	D:\RST\Gene100_10.csv	529	10.59682807	13	5	p`= 0.08	P = 1.25	[ZEA,GRMZM2G152135] [LUT,GRMZM2G300348] [LUT,GRMZM2G012966] [BC,GRMZM2G012966] [AC,GRMZM2G152135]
0.01 0.01 0.01	interval	5	D:\RST\Gene100_1.csv	590	19.14256455	29	5	p`= 0.24	P = 1.25	[ZEA,GRMZM2G152135] [LUT,GRMZM2G300348] [LUT,GRMZM2G012966] [BC,GRMZM2G012966] [BC,GRMZM2G152135]
0.01 0.01 0.01	interval	5	D:\RST\Gene100_2.csv	683	20.07530708	27	8	p`= 0.19	P = 2	[ZEA,GRMZM2G152135] [LUT,GRMZM2G300348] [LUT,GRMZM2G012966] [Bcry,GRMZM2G152135] [Bcry,GRMZM2G108457] [BC,GRMZM2G012966] [BC,GRMZM2G152135] [AC,GRMZM2G152135]
0.01 0.01 0.01	interval	5	D:\RST\Gene100_3.csv	619	17.10573552	27	5	p`= 0.22	P = 1.25	[ZEA,GRMZM2G152135] [LUT,GRMZM2G300348] [LUT,GRMZM2G012966] [BC,GRMZM2G012966] [AC,GRMZM2G152135]
0.01 0.01 0.01	interval	5	D:\RST\Gene100_4.csv	782	20.09277347	22	5	p`= 0.17	P = 1.25	[ZEA,GRMZM2G152135] [LUT,GRMZM2G012966] [LUT,GRMZM2G300348] [BC,GRMZM2G012966] [AC,GRMZM2G152135]
0.01 0.01 0.01	interval	5	D:\RST\Gene100_5.csv	698	18.99932652	22	5	p`= 0.17	P = 1.25	[ZEA,GRMZM2G152135] [LUT,GRMZM2G300348] [LUT,GRMZM2G012966] [BC,GRMZM2G012966] [AC,GRMZM2G152135]
0.01 0.01 0.01	interval	5	D:\RST\Gene100_6.csv	686	18.47899115	22	5	p`= 0.17	P = 1.25	[ZEA,GRMZM2G152135] [LUT,GRMZM2G300348] [LUT,GRMZM2G012966] [BC,GRMZM2G012966] [AC,GRMZM2G152135]
0.01 0.01 0.01	interval	5	D:\RST\Gene100_7.csv	703	20.70460507	22	4	p`= 0.18	P = 1	[ZEA,GRMZM2G152135] [LUT,GRMZM2G012966] [LUT,GRMZM2G300348] [BC,GRMZM2G012966]
0.01 0.01 0.01	interval	5	D:\RST\Gene100_8.csv	758	21.53579715	32	7	p`= 0.25	P = 1.75	[ZEA,GRMZM2G152135] [LUT,GRMZM2G300348] [LUT,GRMZM2G012966] [Bcry,GRMZM2G152135] [BC,GRMZM2G012966] [BC,GRMZM2G152135] [AC,GRMZM2G152135]
0.01 0.01 0.01	interval	5	D:\RST\Gene100_9.csv	647	20.21056844	18	4	p`= 0.14	P = 1	[ZEA,GRMZM2G152135] [LUT,GRMZM2G300348] [LUT,GRMZM2G012966] [BC,GRMZM2G012966]
0.01 0.01 0.01	interval	5	D:\RST\Gene100_10.csv	678	20.09561023	24	6	p`= 0.18	P = 1.5	[ZEA,GRMZM2G152135] [LUT,GRMZM2G300348] [LUT,GRMZM2G012966] [Bcry,GRMZM2G152135] [BC,GRMZM2G012966] [AC,GRMZM2G152135]
0.015 0.015 0.015	interval	5	D:\RST\Gene100_1.csv	380	12.51120962	16	4	p`= 0.12	P = 1	[ZEA,GRMZM2G152135] [LUT,GRMZM2G300348] [LUT,GRMZM2G012966] [BC,GRMZM2G012966]
0.015 0.015 0.015	interval	5	D:\RST\Gene100_2.csv	448	13.60414145	17	6	p`= 0.11	P = 1.5	[ZEA,GRMZM2G152135] [LUT,GRMZM2G300348] [LUT,GRMZM2G012966] [Bcry,GRMZM2G152135] [BC,GRMZM2G012966] [BC,GRMZM2G152135]
0.015 0.015 0.015	interval	5	D:\RST\Gene100_3.csv	390	11.0094158	18	4	p`= 0.14	P = 1	[ZEA,GRMZM2G152135] [LUT,GRMZM2G300348] [LUT,GRMZM2G012966] [BC,GRMZM2G012966]
0.015 0.015 0.015	interval	5	D:\RST\Gene100_4.csv	510	13.2536112	13	4	p`= 0.09	P = 1	[ZEA,GRMZM2G152135] [LUT,GRMZM2G012966] [LUT,GRMZM2G300348] [BC,GRMZM2G012966]
0.015 0.015 0.015	interval	5	D:\RST\Gene100_5.csv	437	12.21371845	15	4	p`= 0.11	P = 1	[ZEA,GRMZM2G152135] [LUT,GRMZM2G300348] [LUT,GRMZM2G012966] [BC,GRMZM2G012966]
0.015 0.015 0.015	interval	5	D:\RST\Gene100_6.csv	460	12.51871522	13	4	p`= 0.09	P = 1	[ZEA,GRMZM2G152135] [LUT,GRMZM2G300348] [LUT,GRMZM2G012966] [BC,GRMZM2G012966]
0.015 0.015 0.015	interval	5	D:\RST\Gene100_7.csv	451	14.1319483	14	4	p`= 0.1	P = 1	[ZEA,GRMZM2G152135] [LUT,GRMZM2G012966] [LUT,GRMZM2G300348] [BC,GRMZM2G012966]
0.015 0.015 0.015	interval	5	D:\RST\Gene100_8.csv	485	13.42844113	20	7	p`= 0.13	P = 1.75	[ZEA,GRMZM2G152135] [LUT,GRMZM2G300348] [LUT,GRMZM2G012966] [Bcry,GRMZM2G152135] [BC,GRMZM2G012966] [BC,GRMZM2G152135] [AC,GRMZM2G152135]
0.015 0.015 0.015	interval	5	D:\RST\Gene100_9.csv	379	13.48645691	12	4	p`= 0.08	P = 1	[ZEA,GRMZM2G152135] [LUT,GRMZM2G300348] [LUT,GRMZM2G012966] [BC,GRMZM2G012966]
0.015 0.015 0.015	interval	5	D:\RST\Gene100_10.csv	461	14.01261212	14	5	p`= 0.09	P = 1.25	[ZEA,GRMZM2G152135] [LUT,GRMZM2G300348] [LUT,GRMZM2G012966] [BC,GRMZM2G012966] [AC,GRMZM2G152135]
0.02 0.02 0.02	interval	5	D:\RST\Gene100_1.csv	265	8.548987385	11	3	p`= 0.08	P = 0.75	[LUT,GRMZM2G300348] [LUT,GRMZM2G012966] [BC,GRMZM2G012966]
0.02 0.02 0.02	interval	5	D:\RST\Gene100_2.csv	324	9.626414565	9	4	p`= 0.05	P = 1	[LUT,GRMZM2G300348] [LUT,GRMZM2G012966] [Bcry,GRMZM2G152135] [BC,GRMZM2G012966]
0.02 0.02 0.02	interval	5	D:\RST\Gene100_3.csv	267	7.590054186	14	3	p`= 0.11	P = 0.75	[LUT,GRMZM2G300348] [LUT,GRMZM2G012966] [BC,GRMZM2G012966]
0.02 0.02 0.02	interval	5	D:\RST\Gene100_4.csv	347	9.708157702	6	2	p`= 0.04	P = 0.5	[LUT,GRMZM2G012966] [LUT,GRMZM2G300348]
0.02 0.02 0.02	interval	5	D:\RST\Gene100_5.csv	314	8.164950601	10	3	p`= 0.07	P = 0.75	[LUT,GRMZM2G300348] [LUT,GRMZM2G012966] [BC,GRMZM2G012966]
0.02 0.02 0.02	interval	5	D:\RST\Gene100_6.csv	319	9.225041719	9	3	p`= 0.06	P = 0.75	[LUT,GRMZM2G300348] [LUT,GRMZM2G012966] [BC,GRMZM2G012966]
0.02 0.02 0.02	interval	5	D:\RST\Gene100_7.csv	317	9.251858918	10	3	p`= 0.07	P = 0.75	[LUT,GRMZM2G012966] [LUT,GRMZM2G300348] [BC,GRMZM2G012966]
0.02 0.02 0.02	interval	5	D:\RST\Gene100_8.csv	327	9.762694466	9	4	p`= 0.05	P = 1	[LUT,GRMZM2G300348] [LUT,GRMZM2G012966] [BC,GRMZM2G012966] [AC,GRMZM2G152135]
0.02 0.02 0.02	interval	5	D:\RST\Gene100_9.csv	273	9.616468581	11	3	p`= 0.08	P = 0.75	[LUT,GRMZM2G300348] [LUT,GRMZM2G012966] [BC,GRMZM2G012966]
0.02 0.02 0.02	interval	5	D:\RST\Gene100_10.csv	329	10.10705357	9	3	p`= 0.06	P = 0.75	[LUT,GRMZM2G300348] [LUT,GRMZM2G012966] [BC,GRMZM2G012966]
0.025 0.025 0.025	interval	5	D:\RST\Gene100_1.csv	200	6.359495596	8	3	p`= 0.05	P = 0.75	[LUT,GRMZM2G300348] [LUT,GRMZM2G012966] [BC,GRMZM2G012966]
0.025 0.025 0.025	interval	5	D:\RST\Gene100_2.csv	244	7.173597248	7	3	p`= 0.04	P = 0.75	[LUT,GRMZM2G300348] [LUT,GRMZM2G012966] [BC,GRMZM2G012966]
0.025 0.025 0.025	interval	5	D:\RST\Gene100_3.csv	204	5.651563648	9	2	p`= 0.07	P = 0.5	[LUT,GRMZM2G300348] [LUT,GRMZM2G012966]
0.025 0.025 0.025	interval	5	D:\RST\Gene100_4.csv	261	7.178930068	6	2	p`= 0.04	P = 0.5	[LUT,GRMZM2G012966] [LUT,GRMZM2G300348]
0.025 0.025 0.025	interval	5	D:\RST\Gene100_5.csv	244	6.178193967	7	3	p`= 0.04	P = 0.75	[LUT,GRMZM2G300348] [LUT,GRMZM2G012966] [BC,GRMZM2G012966]
0.025 0.025 0.025	interval	5	D:\RST\Gene100_6.csv	229	6.480812784	7	3	p`= 0.04	P = 0.75	[LUT,GRMZM2G300348] [LUT,GRMZM2G012966] [Bcry,GRMZM2G152135]
0.025 0.025 0.025	interval	5	D:\RST\Gene100_7.csv	237	6.638631499	8	2	p`= 0.06	P = 0.5	[LUT,GRMZM2G012966] [LUT,GRMZM2G300348]
0.025 0.025 0.025	interval	5	D:\RST\Gene100_8.csv	239	7.006521666	7	3	p`= 0.04	P = 0.75	[LUT,GRMZM2G300348] [LUT,GRMZM2G012966] [BC,GRMZM2G012966]
0.025 0.025 0.025	interval	5	D:\RST\Gene100_9.csv	214	7.093458565	7	2	p`= 0.05	P = 0.5	[LUT,GRMZM2G300348] [Bcry,GRMZM2G152135]
0.025 0.025 0.025	interval	5	D:\RST\Gene100_10.csv	253	7.412775183	7	4	p`= 0.03	P = 1	[LUT,GRMZM2G300348] [LUT,GRMZM2G012966] [Bcry,GRMZM2G152135] [BC,GRMZM2G012966]
0.02 0.01 0.01	interval	5	D:\RST\Gene100_1.csv	456	9.725035199	17	4	p`= 0.13	P = 1	[ZEA,GRMZM2G152135] [LUT,GRMZM2G300348] [LUT,GRMZM2G012966] [BC,GRMZM2G012966]
0.02 0.01 0.01	interval	5	D:\RST\Gene100_2.csv	512	11.06061887	13	4	p`= 0.09	P = 1	[ZEA,GRMZM2G152135] [LUT,GRMZM2G300348] [LUT,GRMZM2G012966] [BC,GRMZM2G012966]
0.02 0.01 0.01	interval	5	D:\RST\Gene100_3.csv	447	8.680278985	22	4	p`= 0.18	P = 1	[ZEA,GRMZM2G152135] [LUT,GRMZM2G300348] [LUT,GRMZM2G012966] [BC,GRMZM2G012966]
0.02 0.01 0.01	interval	5	D:\RST\Gene100_4.csv	620	11.1553761	12	3	p`= 0.09	P = 0.75	[LUT,GRMZM2G012966] [LUT,GRMZM2G300348] [BC,GRMZM2G012966]
0.02 0.01 0.01	interval	5	D:\RST\Gene100_5.csv	494	9.681765286	17	3	p`= 0.14	P = 0.75	[LUT,GRMZM2G300348] [LUT,GRMZM2G012966] [BC,GRMZM2G012966]
0.02 0.01 0.01	interval	5	D:\RST\Gene100_6.csv	511	10.3178224	13	4	p`= 0.09	P = 1	[ZEA,GRMZM2G152135] [LUT,GRMZM2G300348] [LUT,GRMZM2G012966] [BC,GRMZM2G012966]
0.02 0.01 0.01	interval	5	D:\RST\Gene100_7.csv	536	10.83265825	18	4	p`= 0.14	P = 1	[ZEA,GRMZM2G152135] [LUT,GRMZM2G012966] [LUT,GRMZM2G300348] [BC,GRMZM2G012966]
0.02 0.01 0.01	interval	5	D:\RST\Gene100_8.csv	571	11.6055798	18	4	p`= 0.14	P = 1	[LUT,GRMZM2G300348] [LUT,GRMZM2G012966] [BC,GRMZM2G012966] [AC,GRMZM2G152135]
0.02 0.01 0.01	interval	5	D:\RST\Gene100_9.csv	508	11.21368335	16	4	p`= 0.12	P = 1	[ZEA,GRMZM2G152135] [LUT,GRMZM2G300348] [LUT,GRMZM2G012966] [BC,GRMZM2G012966]
0.02 0.01 0.01	interval	5	D:\RST\Gene100_10.csv	529	11.36711085	13	4	p`= 0.09	P = 1	[ZEA,GRMZM2G152135] [LUT,GRMZM2G300348] [LUT,GRMZM2G012966] [BC,GRMZM2G012966]
0.01 0.01 0.01	interval	4	D:\RST\Gene100_1.csv	605	20.58901667	26	6	p`= 0.2	P = 1.5	[ZEA,GRMZM2G152135] [LUT,GRMZM2G012966] [LUT,GRMZM2G300348] [Bcry,GRMZM2G152135] [BC,GRMZM2G012966] [BC,GRMZM2G152135]
0.01 0.01 0.01	interval	4	D:\RST\Gene100_2.csv	668	17.7606	23	6	p`= 0.17	P = 1.5	[ZEA,GRMZM2G152135] [LUT,GRMZM2G012966] [LUT,GRMZM2G300348] [Bcry,GRMZM2G152135] [BC,GRMZM2G012966] [BC,GRMZM2G152135]
0.01 0.01 0.01	interval	4	D:\RST\Gene100_3.csv	620	15.14966667	24	4	p`= 0.2	P = 1	[ZEA,GRMZM2G152135] [LUT,GRMZM2G300348] [LUT,GRMZM2G012966] [BC,GRMZM2G012966]
0.01 0.01 0.01	interval	4	D:\RST\Gene100_4.csv	737	18.76745	21	4	p`= 0.17	P = 1	[ZEA,GRMZM2G152135] [LUT,GRMZM2G300348] [GRMZM2G012966,LUT] [BC,GRMZM2G012966]
0.01 0.01 0.01	interval	4	D:\RST\Gene100_5.csv	679	19.16981667	25	6	p`= 0.19	P = 1.5	[ZEA,GRMZM2G152135] [LUT,GRMZM2G012966] [LUT,GRMZM2G300348] [Bcry,GRMZM2G152135] [BC,GRMZM2G012966] [BC,GRMZM2G152135]
0.01 0.01 0.01	interval	4	D:\RST\Gene100_6.csv	666	17.85655411	18	4	p`= 0.14	P = 1	[ZEA,GRMZM2G152135] [LUT,GRMZM2G012966] [LUT,GRMZM2G300348] [BC,GRMZM2G012966]
0.01 0.01 0.01	interval	4	D:\RST\Gene100_7.csv	714	19.88623052	19	4	p`= 0.15	P = 1	[ZEA,GRMZM2G152135] [LUT,GRMZM2G012966] [LUT,GRMZM2G300348] [BC,GRMZM2G012966]
0.01 0.01 0.01	interval	4	D:\RST\Gene100_8.csv	692	19.05658977	26	7	p`= 0.19	P = 1.75	[ZEA,GRMZM2G152135] [LUT,GRMZM2G012966] [LUT,GRMZM2G300348] [Bcry,GRMZM2G152135] [BC,GRMZM2G012966] [BC,GRMZM2G152135] [AC,GRMZM2G152135]
0.01 0.01 0.01	interval	4	D:\RST\Gene100_9.csv	650	20.10498105	20	5	p`= 0.15	P = 1.25	[ZEA,GRMZM2G152135] [LUT,GRMZM2G012966] [LUT,GRMZM2G300348] [Bcry,GRMZM2G152135] [BC,GRMZM2G012966]
0.01 0.01 0.01	interval	4	D:\RST\Gene100_10.csv	640	19.15892804	24	6	p`= 0.18	P = 1.5	[ZEA,GRMZM2G152135] [LUT,GRMZM2G012966] [LUT,GRMZM2G300348] [Bcry,GRMZM2G152135] [BC,GRMZM2G012966] [AC,GRMZM2G152135]
0.015 0.015 0.015	interval	4	D:\RST\Gene100_1.csv	388	11.47773333	16	4	p`= 0.12	P = 1	[ZEA,GRMZM2G152135] [LUT,GRMZM2G012966] [LUT,GRMZM2G300348] [BC,GRMZM2G012966]
0.015 0.015 0.015	interval	4	D:\RST\Gene100_2.csv	428	12.00233334	15	6	p`= 0.09	P = 1.5	[ZEA,GRMZM2G152135] [LUT,GRMZM2G012966] [LUT,GRMZM2G300348] [Bcry,GRMZM2G152135] [BC,GRMZM2G012966] [BC,GRMZM2G152135]
0.015 0.015 0.015	interval	4	D:\RST\Gene100_3.csv	403	10.06901667	18	4	p`= 0.14	P = 1	[ZEA,GRMZM2G152135] [LUT,GRMZM2G300348] [LUT,GRMZM2G012966] [BC,GRMZM2G012966]
0.015 0.015 0.015	interval	4	D:\RST\Gene100_4.csv	471	12.65411667	14	4	p`= 0.1	P = 1	[ZEA,GRMZM2G152135] [LUT,GRMZM2G300348] [GRMZM2G012966,LUT] [BC,GRMZM2G012966]
0.015 0.015 0.015	interval	4	D:\RST\Gene100_5.csv	428	11.83773333	14	4	p`= 0.1	P = 1	[ZEA,GRMZM2G152135] [LUT,GRMZM2G012966] [LUT,GRMZM2G300348] [BC,GRMZM2G012966]
0.015 0.015 0.015	interval	4	D:\RST\Gene100_6.csv	442	12.4327056	8	3	p`= 0.05	P = 0.75	[ZEA,GRMZM2G152135] [LUT,GRMZM2G012966] [LUT,GRMZM2G300348]
0.015 0.015 0.015	interval	4	D:\RST\Gene100_7.csv	441	12.44205332	12	4	p`= 0.08	P = 1	[ZEA,GRMZM2G152135] [LUT,GRMZM2G012966] [LUT,GRMZM2G300348] [BC,GRMZM2G012966]
0.015 0.015 0.015	interval	4	D:\RST\Gene100_8.csv	450	12.92113472	14	4	p`= 0.1	P = 1	[ZEA,GRMZM2G152135] [LUT,GRMZM2G012966] [LUT,GRMZM2G300348] [BC,GRMZM2G012966]
0.015 0.015 0.015	interval	4	D:\RST\Gene100_9.csv	391	13.06507365	12	4	p`= 0.08	P = 1	[ZEA,GRMZM2G152135] [LUT,GRMZM2G012966] [LUT,GRMZM2G300348] [BC,GRMZM2G012966]
0.015 0.015 0.015	interval	4	D:\RST\Gene100_10.csv	441	12.82071258	14	4	p`= 0.1	P = 1	[ZEA,GRMZM2G152135] [LUT,GRMZM2G012966] [LUT,GRMZM2G300348] [BC,GRMZM2G012966]
0.02 0.02 0.02	interval	4	D:\RST\Gene100_1.csv	278	10.89806666	12	3	p`= 0.09	P = 0.75	[LUT,GRMZM2G012966] [LUT,GRMZM2G300348] [BC,GRMZM2G012966]
0.02 0.02 0.02	interval	4	D:\RST\Gene100_2.csv	309	8.478833334	11	4	p`= 0.07	P = 1	[LUT,GRMZM2G012966] [LUT,GRMZM2G300348] [Bcry,GRMZM2G152135] [BC,GRMZM2G012966]
0.02 0.02 0.02	interval	4	D:\RST\Gene100_3.csv	262	6.556033333	11	3	p`= 0.08	P = 0.75	[LUT,GRMZM2G300348] [LUT,GRMZM2G012966] [Bcry,GRMZM2G152135]
0.02 0.02 0.02	interval	4	D:\RST\Gene100_4.csv	327	8.010049999	7	2	p`= 0.05	P = 0.5	[LUT,GRMZM2G300348] [GRMZM2G012966,LUT]
0.02 0.02 0.02	interval	4	D:\RST\Gene100_5.csv	306	7.443933332	9	3	p`= 0.06	P = 0.75	[LUT,GRMZM2G012966] [LUT,GRMZM2G300348] [Bcry,GRMZM2G152135]
0.02 0.02 0.02	interval	4	D:\RST\Gene100_6.csv	299	8.348116867	7	3	p`= 0.04	P = 0.75	[LUT,GRMZM2G012966] [LUT,GRMZM2G300348] [BC,GRMZM2G012966]
0.02 0.02 0.02	interval	4	D:\RST\Gene100_7.csv	314	8.548414934	9	3	p`= 0.06	P = 0.75	[LUT,GRMZM2G012966] [LUT,GRMZM2G300348] [BC,GRMZM2G012966]
0.02 0.02 0.02	interval	4	D:\RST\Gene100_8.csv	308	9.063311402	11	2	p`= 0.09	P = 0.5	[LUT,GRMZM2G300348] [BC,GRMZM2G012966]
0.02 0.02 0.02	interval	4	D:\RST\Gene100_9.csv	280	9.329016566	8	3	p`= 0.05	P = 0.75	[LUT,GRMZM2G012966] [LUT,GRMZM2G300348] [BC,GRMZM2G012966]
0.02 0.02 0.02	interval	4	D:\RST\Gene100_10.csv	313	8.965715953	10	4	p`= 0.06	P = 1	[LUT,GRMZM2G012966] [LUT,GRMZM2G300348] [Bcry,GRMZM2G152135] [BC,GRMZM2G012966]
0.025 0.025 0.025	interval	4	D:\RST\Gene100_1.csv	213	6.263983333	8	3	p`= 0.05	P = 0.75	[LUT,GRMZM2G012966] [LUT,GRMZM2G300348] [BC,GRMZM2G012966]
0.025 0.025 0.025	interval	4	D:\RST\Gene100_2.csv	219	6.927749999	6	3	p`= 0.03	P = 0.75	[LUT,GRMZM2G012966] [LUT,GRMZM2G300348] [BC,GRMZM2G012966]
0.025 0.025 0.025	interval	4	D:\RST\Gene100_3.csv	204	4.885133334	8	2	p`= 0.06	P = 0.5	[LUT,GRMZM2G300348] [LUT,GRMZM2G012966]
0.025 0.025 0.025	interval	4	D:\RST\Gene100_4.csv	251	8.119333335	8	3	p`= 0.05	P = 0.75	[LUT,GRMZM2G300348] [GRMZM2G012966,LUT] [BC,GRMZM2G012966]
0.025 0.025 0.025	interval	4	D:\RST\Gene100_5.csv	230	11.10176667	9	2	p`= 0.07	P = 0.5	[LUT,GRMZM2G012966] [LUT,GRMZM2G300348]
0.025 0.025 0.025	interval	4	D:\RST\Gene100_6.csv	223	6.249592932	7	3	p`= 0.04	P = 0.75	[LUT,GRMZM2G012966] [LUT,GRMZM2G300348] [BC,GRMZM2G012966]
0.025 0.025 0.025	interval	4	D:\RST\Gene100_7.csv	230	5.849734151	8	4	p`= 0.04	P = 1	[LUT,GRMZM2G012966] [LUT,GRMZM2G300348] [Bcry,GRMZM2G152135] [BC,GRMZM2G012966]
0.025 0.025 0.025	interval	4	D:\RST\Gene100_8.csv	222	7.232178267	10	3	p`= 0.07	P = 0.75	[LUT,GRMZM2G012966] [LUT,GRMZM2G300348] [BC,GRMZM2G012966]
0.025 0.025 0.025	interval	4	D:\RST\Gene100_9.csv	206	6.606349301	6	3	p`= 0.03	P = 0.75	[LUT,GRMZM2G012966] [LUT,GRMZM2G300348] [BC,GRMZM2G012966]
0.025 0.025 0.025	interval	4	D:\RST\Gene100_10.csv	227	6.415541816	7	3	p`= 0.04	P = 0.75	[LUT,GRMZM2G012966] [LUT,GRMZM2G300348] [BC,GRMZM2G012966]
0.02 0.01 0.01	interval	4	D:\RST\Gene100_1.csv	442	20.00768333	17	3	p`= 0.14	P = 0.75	[LUT,GRMZM2G012966] [LUT,GRMZM2G300348] [BC,GRMZM2G012966]
0.02 0.01 0.01	interval	4	D:\RST\Gene100_2.csv	481	19.36298333	16	4	p`= 0.12	P = 1	[ZEA,GRMZM2G152135] [LUT,GRMZM2G012966] [LUT,GRMZM2G300348] [BC,GRMZM2G012966]
0.02 0.01 0.01	interval	4	D:\RST\Gene100_3.csv	428	18.7369	19	4	p`= 0.15	P = 1	[LUT,GRMZM2G300348] [LUT,GRMZM2G012966] [Bcry,GRMZM2G152135] [BC,GRMZM2G012966]
0.02 0.01 0.01	interval	4	D:\RST\Gene100_4.csv	563	27.5831	13	4	p`= 0.09	P = 1	[LUT,GRMZM2G300348] [GRMZM2G012966,LUT] [Bcry,GRMZM2G152135] [BC,GRMZM2G012966]
0.02 0.01 0.01	interval	4	D:\RST\Gene100_5.csv	458	22.14308333	16	4	p`= 0.12	P = 1	[ZEA,GRMZM2G152135] [LUT,GRMZM2G012966] [LUT,GRMZM2G300348] [BC,GRMZM2G012966]
0.02 0.01 0.01	interval	4	D:\RST\Gene100_6.csv	488	9.600039049	11	3	p`= 0.08	P = 0.75	[LUT,GRMZM2G012966] [LUT,GRMZM2G300348] [BC,GRMZM2G012966]
0.02 0.01 0.01	interval	4	D:\RST\Gene100_7.csv	506	9.725957215	11	4	p`= 0.07	P = 1	[ZEA,GRMZM2G152135] [LUT,GRMZM2G012966] [LUT,GRMZM2G300348] [BC,GRMZM2G012966]
0.02 0.01 0.01	interval	4	D:\RST\Gene100_8.csv	525	10.0848813	18	4	p`= 0.14	P = 1	[LUT,GRMZM2G012966] [LUT,GRMZM2G300348] [BC,GRMZM2G012966] [AC,GRMZM2G152135]
0.02 0.01 0.01	interval	4	D:\RST\Gene100_9.csv	481	10.24284725	11	4	p`= 0.07	P = 1	[ZEA,GRMZM2G152135] [LUT,GRMZM2G012966] [LUT,GRMZM2G300348] [BC,GRMZM2G012966]
0.02 0.01 0.01	interval	4	D:\RST\Gene100_10.csv	500	9.492173115	12	5	p`= 0.07	P = 1.25	[ZEA,GRMZM2G152135] [LUT,GRMZM2G012966] [LUT,GRMZM2G300348] [Bcry,GRMZM2G152135] [BC,GRMZM2G012966]
0.01 0.01 0.01	interval	3	D:\RST\Gene100_1.csv	551	39.24726667	23	5	p`= 0.18	P = 1.25	[ZEA,GRMZM2G152135] [LUT,GRMZM2G300348] [LUT,GRMZM2G012966] [Bcry,GRMZM2G152135] [BC,GRMZM2G012966]
0.01 0.01 0.01	interval	3	D:\RST\Gene100_2.csv	643	43.1447	18	5	p`= 0.13	P = 1.25	[ZEA,GRMZM2G152135] [LUT,GRMZM2G300348] [LUT,GRMZM2G012966] [BC,GRMZM2G012966] [BC,GRMZM2G152135]
0.01 0.01 0.01	interval	3	D:\RST\Gene100_3.csv	571	36.64603333	27	7	p`= 0.2	P = 1.75	[ZEA,GRMZM2G152135] [LUT,GRMZM2G300348] [LUT,GRMZM2G012966] [BC,GRMZM2G012966] [BC,GRMZM2G152135] [AC,GRMZM2G300348] [AC,GRMZM2G152135]
0.01 0.01 0.01	interval	3	D:\RST\Gene100_4.csv	696	44.68683333	21	5	p`= 0.16	P = 1.25	[ZEA,GRMZM2G152135] [LUT,GRMZM2G012966] [LUT,GRMZM2G300348] [BC,GRMZM2G012966] [BC,GRMZM2G152135]
0.01 0.01 0.01	interval	3	D:\RST\Gene100_5.csv	620	40.81583333	24	6	p`= 0.18	P = 1.5	[ZEA,GRMZM2G152135] [LUT,GRMZM2G012966] [LUT,GRMZM2G300348] [BC,GRMZM2G012966] [BC,GRMZM2G152135] [AC,GRMZM2G152135]
0.01 0.01 0.01	interval	3	D:\RST\Gene100_6.csv	643	16.74968483	21	5	p`= 0.16	P = 1.25	[ZEA,GRMZM2G152135] [LUT,GRMZM2G300348] [LUT,GRMZM2G012966] [BC,GRMZM2G012966] [AC,GRMZM2G152135]
0.01 0.01 0.01	interval	3	D:\RST\Gene100_7.csv	683	17.78729572	23	5	p`= 0.18	P = 1.25	[ZEA,GRMZM2G152135] [LUT,GRMZM2G012966] [LUT,GRMZM2G300348] [BC,GRMZM2G012966] [BC,GRMZM2G152135]
0.01 0.01 0.01	interval	3	D:\RST\Gene100_8.csv	698	18.22440325	25	6	p`= 0.19	P = 1.5	[ZEA,GRMZM2G152135] [LUT,GRMZM2G012966] [LUT,GRMZM2G300348] [BC,GRMZM2G012966] [BC,GRMZM2G152135] [AC,GRMZM2G152135]
0.01 0.01 0.01	interval	3	D:\RST\Gene100_9.csv	599	17.3020907	20	5	p`= 0.15	P = 1.25	[ZEA,GRMZM2G152135] [LUT,GRMZM2G300348] [LUT,GRMZM2G012966] [BC,GRMZM2G012966] [AC,GRMZM2G152135]
0.01 0.01 0.01	interval	3	D:\RST\Gene100_10.csv	628	16.63775217	18	6	p`= 0.12	P = 1.5	[ZEA,GRMZM2G152135] [LUT,GRMZM2G300348] [LUT,GRMZM2G012966] [BC,GRMZM2G012966] [BC,GRMZM2G152135] [AC,GRMZM2G152135]
0.015 0.015 0.015	interval	3	D:\RST\Gene100_1.csv	342	24.93213333	15	3	p`= 0.12	P = 0.75	[LUT,GRMZM2G300348] [LUT,GRMZM2G012966] [BC,GRMZM2G012966]
0.015 0.015 0.015	interval	3	D:\RST\Gene100_2.csv	415	27.42115	12	4	p`= 0.08	P = 1	[LUT,GRMZM2G300348] [LUT,GRMZM2G012966] [BC,GRMZM2G012966] [BC,GRMZM2G152135]
0.015 0.015 0.015	interval	3	D:\RST\Gene100_3.csv	355	21.52399998	14	4	p`= 0.1	P = 1	[ZEA,GRMZM2G152135] [LUT,GRMZM2G300348] [LUT,GRMZM2G012966] [BC,GRMZM2G012966]
0.015 0.015 0.015	interval	3	D:\RST\Gene100_4.csv	472	29.45568333	15	4	p`= 0.11	P = 1	[ZEA,GRMZM2G152135] [LUT,GRMZM2G012966] [LUT,GRMZM2G300348] [BC,GRMZM2G012966]
0.015 0.015 0.015	interval	3	D:\RST\Gene100_5.csv	398	28.13741667	12	4	p`= 0.08	P = 1	[ZEA,GRMZM2G152135] [LUT,GRMZM2G012966] [LUT,GRMZM2G300348] [BC,GRMZM2G012966]
0.015 0.015 0.015	interval	3	D:\RST\Gene100_6.csv	426	10.22348503	14	5	p`= 0.09	P = 1.25	[ZEA,GRMZM2G152135] [LUT,GRMZM2G300348] [LUT,GRMZM2G012966] [BC,GRMZM2G012966] [AC,GRMZM2G152135]
0.015 0.015 0.015	interval	3	D:\RST\Gene100_7.csv	420	10.7154644	12	4	p`= 0.08	P = 1	[ZEA,GRMZM2G152135] [LUT,GRMZM2G012966] [LUT,GRMZM2G300348] [BC,GRMZM2G012966]
0.015 0.015 0.015	interval	3	D:\RST\Gene100_8.csv	416	11.18793662	11	5	p`= 0.06	P = 1.25	[ZEA,GRMZM2G152135] [LUT,GRMZM2G012966] [LUT,GRMZM2G300348] [BC,GRMZM2G012966] [AC,GRMZM2G152135]
0.015 0.015 0.015	interval	3	D:\RST\Gene100_9.csv	364	11.25730526	10	4	p`= 0.06	P = 1	[ZEA,GRMZM2G152135] [LUT,GRMZM2G300348] [LUT,GRMZM2G012966] [BC,GRMZM2G012966]
0.015 0.015 0.015	interval	3	D:\RST\Gene100_10.csv	404	10.34403765	11	5	p`= 0.06	P = 1.25	[ZEA,GRMZM2G152135] [LUT,GRMZM2G300348] [LUT,GRMZM2G012966] [BC,GRMZM2G012966] [AC,GRMZM2G152135]
0.02 0.02 0.02	interval	3	D:\RST\Gene100_1.csv	244	16.91145	10	3	p`= 0.07	P = 0.75	[LUT,GRMZM2G300348] [LUT,GRMZM2G012966] [BC,GRMZM2G012966]
0.02 0.02 0.02	interval	3	D:\RST\Gene100_2.csv	300	18.82816667	8	4	p`= 0.04	P = 1	[LUT,GRMZM2G300348] [LUT,GRMZM2G012966] [BC,GRMZM2G012966] [BC,GRMZM2G152135]
0.02 0.02 0.02	interval	3	D:\RST\Gene100_3.csv	237	11.89483333	9	4	p`= 0.05	P = 1	[ZEA,GRMZM2G152135] [LUT,GRMZM2G300348] [LUT,GRMZM2G012966] [BC,GRMZM2G012966]
0.02 0.02 0.02	interval	3	D:\RST\Gene100_4.csv	328	12.05085	9	4	p`= 0.05	P = 1	[ZEA,GRMZM2G152135] [LUT,GRMZM2G012966] [LUT,GRMZM2G300348] [BC,GRMZM2G012966]
0.02 0.02 0.02	interval	3	D:\RST\Gene100_5.csv	282	16.40273333	10	3	p`= 0.07	P = 0.75	[LUT,GRMZM2G012966] [LUT,GRMZM2G300348] [BC,GRMZM2G012966]
0.02 0.02 0.02	interval	3	D:\RST\Gene100_6.csv	296	6.839699399	9	3	p`= 0.06	P = 0.75	[LUT,GRMZM2G300348] [LUT,GRMZM2G012966] [BC,GRMZM2G012966]
0.02 0.02 0.02	interval	3	D:\RST\Gene100_7.csv	293	6.9091072	9	4	p`= 0.05	P = 1	[ZEA,GRMZM2G152135] [LUT,GRMZM2G012966] [LUT,GRMZM2G300348] [BC,GRMZM2G012966]
0.02 0.02 0.02	interval	3	D:\RST\Gene100_8.csv	296	7.338359964	6	2	p`= 0.04	P = 0.5	[LUT,GRMZM2G012966] [LUT,GRMZM2G300348]
0.02 0.02 0.02	interval	3	D:\RST\Gene100_9.csv	267	7.300726569	9	3	p`= 0.06	P = 0.75	[LUT,GRMZM2G300348] [LUT,GRMZM2G012966] [BC,GRMZM2G012966]
0.02 0.02 0.02	interval	3	D:\RST\Gene100_10.csv	289	6.801963731	11	5	p`= 0.06	P = 1.25	[ZEA,GRMZM2G152135] [LUT,GRMZM2G300348] [LUT,GRMZM2G012966] [BC,GRMZM2G012966] [AC,GRMZM2G152135]
0.025 0.025 0.025	interval	3	D:\RST\Gene100_1.csv	184	11.21073333	9	3	p`= 0.06	P = 0.75	[LUT,GRMZM2G300348] [BC,GRMZM2G012966] [AC,GRMZM2G012966]
0.025 0.025 0.025	interval	3	D:\RST\Gene100_2.csv	230	12.94648333	7	3	p`= 0.04	P = 0.75	[LUT,GRMZM2G300348] [LUT,GRMZM2G012966] [BC,GRMZM2G012966]
0.025 0.025 0.025	interval	3	D:\RST\Gene100_3.csv	179	9.373333331	6	2	p`= 0.04	P = 0.5	[LUT,GRMZM2G300348] [BC,GRMZM2G012966]
0.025 0.025 0.025	interval	3	D:\RST\Gene100_4.csv	244	14.29358333	5	2	p`= 0.03	P = 0.5	[LUT,GRMZM2G012966] [BC,GRMZM2G012966]
0.025 0.025 0.025	interval	3	D:\RST\Gene100_5.csv	213	11.26188333	7	1	p`= 0.06	P = 0.25	[LUT,GRMZM2G012966]
0.025 0.025 0.025	interval	3	D:\RST\Gene100_6.csv	204	4.658050668	6	2	p`= 0.04	P = 0.5	[LUT,GRMZM2G300348] [BC,GRMZM2G012966]
0.025 0.025 0.025	interval	3	D:\RST\Gene100_7.csv	226	4.905863186	7	3	p`= 0.04	P = 0.75	[LUT,GRMZM2G012966] [LUT,GRMZM2G300348] [BC,GRMZM2G012966]
0.025 0.025 0.025	interval	3	D:\RST\Gene100_8.csv	208	4.939822419	7	2	p`= 0.05	P = 0.5	[LUT,GRMZM2G012966] [LUT,GRMZM2G300348]
0.025 0.025 0.025	interval	3	D:\RST\Gene100_9.csv	209	5.255652134	9	3	p`= 0.06	P = 0.75	[ZEA,GRMZM2G152135] [LUT,GRMZM2G300348] [LUT,GRMZM2G012966]
0.025 0.025 0.025	interval	3	D:\RST\Gene100_10.csv	209	4.704310966	6	2	p`= 0.04	P = 0.5	[LUT,GRMZM2G300348] [BC,GRMZM2G012966]
0.02 0.01 0.01	interval	3	D:\RST\Gene100_1.csv	371	17.70988333	14	4	p`= 0.1	P = 1	[ZEA,GRMZM2G152135] [LUT,GRMZM2G300348] [LUT,GRMZM2G012966] [BC,GRMZM2G012966]
0.02 0.01 0.01	interval	3	D:\RST\Gene100_2.csv	434	21.2387	9	4	p`= 0.05	P = 1	[LUT,GRMZM2G300348] [LUT,GRMZM2G012966] [BC,GRMZM2G012966] [BC,GRMZM2G152135]
0.02 0.01 0.01	interval	3	D:\RST\Gene100_3.csv	374	16.04616667	13	4	p`= 0.09	P = 1	[ZEA,GRMZM2G152135] [LUT,GRMZM2G300348] [LUT,GRMZM2G012966] [BC,GRMZM2G012966]
0.02 0.01 0.01	interval	3	D:\RST\Gene100_4.csv	515	21.05923334	15	4	p`= 0.11	P = 1	[ZEA,GRMZM2G152135] [LUT,GRMZM2G012966] [LUT,GRMZM2G300348] [BC,GRMZM2G012966]
0.02 0.01 0.01	interval	3	D:\RST\Gene100_5.csv	414	17.67648333	13	3	p`= 0.1	P = 0.75	[LUT,GRMZM2G012966] [LUT,GRMZM2G300348] [BC,GRMZM2G012966]
0.02 0.01 0.01	interval	3	D:\RST\Gene100_6.csv	431	7.492967697	12	4	p`= 0.08	P = 1	[ZEA,GRMZM2G152135] [LUT,GRMZM2G300348] [LUT,GRMZM2G012966] [BC,GRMZM2G012966]
0.02 0.01 0.01	interval	3	D:\RST\Gene100_7.csv	454	7.766642181	15	4	p`= 0.11	P = 1	[ZEA,GRMZM2G152135] [LUT,GRMZM2G012966] [LUT,GRMZM2G300348] [BC,GRMZM2G012966]
0.02 0.01 0.01	interval	3	D:\RST\Gene100_8.csv	463	8.563556564	11	3	p`= 0.08	P = 0.75	[LUT,GRMZM2G012966] [LUT,GRMZM2G300348] [BC,GRMZM2G012966]
0.02 0.01 0.01	interval	3	D:\RST\Gene100_9.csv	417	8.214318001	14	4	p`= 0.1	P = 1	[ZEA,GRMZM2G152135] [LUT,GRMZM2G300348] [LUT,GRMZM2G012966] [BC,GRMZM2G012966]
0.02 0.01 0.01	interval	3	D:\RST\Gene100_10.csv	431	7.499940769	11	5	p`= 0.06	P = 1.25	[ZEA,GRMZM2G152135] [LUT,GRMZM2G300348] [LUT,GRMZM2G012966] [BC,GRMZM2G012966] [AC,GRMZM2G152135]
0.01 0.01 0.01	interval	2	D:\RST\Gene100_1.csv	495	13.205827	15	5	p`= 0.1	P = 1.25	[ZEA,GRMZM2G152135] [LUT,GRMZM2G012966] [BC,GRMZM2G012966] [AC,GRMZM2G108457] [AC,GRMZM2G300348]
0.01 0.01 0.01	interval	2	D:\RST\Gene100_2.csv	556	14.73516722	17	4	p`= 0.13	P = 1	[ZEA,GRMZM2G152135] [LUT,GRMZM2G012966] [LUT,GRMZM2G300348] [BC,GRMZM2G012966]
0.01 0.01 0.01	interval	2	D:\RST\Gene100_3.csv	470	11.77942738	23	4	p`= 0.19	P = 1	[LUT,GRMZM2G012966] [LUT,GRMZM2G300348] [Bcry,GRMZM2G152135] [BC,GRMZM2G012966]
0.01 0.01 0.01	interval	2	D:\RST\Gene100_4.csv	638	14.96614652	14	4	p`= 0.1	P = 1	[ZEA,GRMZM2G152135] [LUT,GRMZM2G300348] [GRMZM2G012966,LUT] [BC,GRMZM2G012966]
0.01 0.01 0.01	interval	2	D:\RST\Gene100_5.csv	523	13.29916282	19	6	p`= 0.13	P = 1.5	[ZEA,GRMZM2G152135] [LUT,GRMZM2G012966] [LUT,GRMZM2G300348] [Bcry,GRMZM2G152135] [BC,GRMZM2G012966] [BC,GRMZM2G152135]
0.01 0.01 0.01	interval	2	D:\RST\Gene100_6.csv	561	13.38810342	12	4	p`= 0.08	P = 1	[ZEA,GRMZM2G152135] [LUT,GRMZM2G012966] [LUT,GRMZM2G300348] [BC,GRMZM2G012966]
0.01 0.01 0.01	interval	2	D:\RST\Gene100_7.csv	555	13.161177	15	3	p`= 0.12	P = 0.75	[LUT,GRMZM2G012966] [LUT,GRMZM2G300348] [BC,GRMZM2G012966]
0.01 0.01 0.01	interval	2	D:\RST\Gene100_8.csv	592	14.47421297	19	4	p`= 0.15	P = 1	[GRMZM2G300348,LUT] [GRMZM2G152135,AC] [GRMZM2G012966,LUT] [BC,GRMZM2G012966]
0.01 0.01 0.01	interval	2	D:\RST\Gene100_9.csv	542	14.13831528	14	3	p`= 0.11	P = 0.75	[ZEA,GRMZM2G152135] [LUT,GRMZM2G012966] [BC,GRMZM2G012966]
0.01 0.01 0.01	interval	2	D:\RST\Gene100_10.csv	553	13.0885496	17	5	p`= 0.12	P = 1.25	[ZEA,GRMZM2G152135] [LUT,GRMZM2G012966] [LUT,GRMZM2G300348] [BC,GRMZM2G012966] [AC,GRMZM2G152135]
0.015 0.015 0.015	interval	2	D:\RST\Gene100_1.csv	309	7.519702733	9	2	p`= 0.07	P = 0.5	[LUT,GRMZM2G012966] [BC,GRMZM2G012966]
0.015 0.015 0.015	interval	2	D:\RST\Gene100_2.csv	360	8.859586132	10	3	p`= 0.07	P = 0.75	[ZEA,GRMZM2G152135] [LUT,GRMZM2G012966] [BC,GRMZM2G012966]
0.015 0.015 0.015	interval	2	D:\RST\Gene100_3.csv	290	6.272942082	14	3	p`= 0.11	P = 0.75	[LUT,GRMZM2G012966] [LUT,GRMZM2G300348] [BC,GRMZM2G012966]
0.015 0.015 0.015	interval	2	D:\RST\Gene100_4.csv	399	8.916037067	7	2	p`= 0.05	P = 0.5	[GRMZM2G012966,LUT] [BC,GRMZM2G012966]
0.015 0.015 0.015	interval	2	D:\RST\Gene100_5.csv	334	7.434973081	12	3	p`= 0.09	P = 0.75	[LUT,GRMZM2G012966] [LUT,GRMZM2G300348] [BC,GRMZM2G012966]
0.015 0.015 0.015	interval	2	D:\RST\Gene100_6.csv	355	8.187824353	9	3	p`= 0.06	P = 0.75	[LUT,GRMZM2G012966] [LUT,GRMZM2G300348] [BC,GRMZM2G012966]
0.015 0.015 0.015	interval	2	D:\RST\Gene100_7.csv	343	7.364146217	9	3	p`= 0.06	P = 0.75	[LUT,GRMZM2G012966] [LUT,GRMZM2G300348] [BC,GRMZM2G012966]
0.015 0.015 0.015	interval	2	D:\RST\Gene100_8.csv	365	8.421295067	12	3	p`= 0.09	P = 0.75	[GRMZM2G300348,LUT] [GRMZM2G012966,LUT] [BC,GRMZM2G012966]
0.015 0.015 0.015	interval	2	D:\RST\Gene100_9.csv	332	8.305714285	9	2	p`= 0.07	P = 0.5	[LUT,GRMZM2G012966] [BC,GRMZM2G012966]
0.015 0.015 0.015	interval	2	D:\RST\Gene100_10.csv	357	7.815770833	8	2	p`= 0.06	P = 0.5	[LUT,GRMZM2G012966] [BC,GRMZM2G012966]
0.02 0.02 0.02	interval	2	D:\RST\Gene100_1.csv	222	4.724830584	8	3	p`= 0.05	P = 0.75	[ZEA,GRMZM2G300348] [LUT,GRMZM2G012966] [BC,GRMZM2G012966]
0.02 0.02 0.02	interval	2	D:\RST\Gene100_2.csv	251	5.48687288	6	2	p`= 0.04	P = 0.5	[LUT,GRMZM2G012966] [BC,GRMZM2G012966]
0.02 0.02 0.02	interval	2	D:\RST\Gene100_3.csv	198	4.00629065	11	3	p`= 0.08	P = 0.75	[LUT,GRMZM2G012966] [LUT,GRMZM2G300348] [BC,GRMZM2G012966]
0.02 0.02 0.02	interval	2	D:\RST\Gene100_4.csv	265	5.884184285	6	3	p`= 0.03	P = 0.75	[GRMZM2G012966,LUT] [Bcry,GRMZM2G152135] [BC,GRMZM2G012966]
0.02 0.02 0.02	interval	2	D:\RST\Gene100_5.csv	232	5.007920333	9	2	p`= 0.07	P = 0.5	[LUT,GRMZM2G012966] [LUT,GRMZM2G300348]
0.02 0.02 0.02	interval	2	D:\RST\Gene100_6.csv	252	5.494003431	9	3	p`= 0.06	P = 0.75	[LUT,GRMZM2G012966] [LUT,GRMZM2G300348] [BC,GRMZM2G012966]
0.02 0.02 0.02	interval	2	D:\RST\Gene100_7.csv	248	5.138232219	8	3	p`= 0.05	P = 0.75	[LUT,GRMZM2G012966] [LUT,GRMZM2G300348] [BC,GRMZM2G012966]
0.02 0.02 0.02	interval	2	D:\RST\Gene100_8.csv	253	5.378602334	8	3	p`= 0.05	P = 0.75	[GRMZM2G300348,LUT] [GRMZM2G012966,LUT] [BC,GRMZM2G012966]
0.02 0.02 0.02	interval	2	D:\RST\Gene100_9.csv	233	5.143991617	6	2	p`= 0.04	P = 0.5	[LUT,GRMZM2G012966] [BC,GRMZM2G012966]
0.02 0.02 0.02	interval	2	D:\RST\Gene100_10.csv	244	5.067271451	8	2	p`= 0.06	P = 0.5	[LUT,GRMZM2G012966] [BC,GRMZM2G012966]
0.025 0.025 0.025	interval	2	D:\RST\Gene100_1.csv	161	3.217683283	9	2	p`= 0.07	P = 0.5	[LUT,GRMZM2G012966] [BC,GRMZM2G012966]
0.025 0.025 0.025	interval	2	D:\RST\Gene100_2.csv	184	3.791572467	6	1	p`= 0.05	P = 0.25	[BC,GRMZM2G012966]
0.025 0.025 0.025	interval	2	D:\RST\Gene100_3.csv	136	2.450775599	7	1	p`= 0.06	P = 0.25	[LUT,GRMZM2G012966]
0.025 0.025 0.025	interval	2	D:\RST\Gene100_4.csv	184	3.393950133	5	2	p`= 0.03	P = 0.5	[GRMZM2G012966,LUT] [BC,GRMZM2G012966]
0.025 0.025 0.025	interval	2	D:\RST\Gene100_5.csv	163	2.904591036	5	1	p`= 0.04	P = 0.25	[LUT,GRMZM2G012966]
0.025 0.025 0.025	interval	2	D:\RST\Gene100_6.csv	170	3.387508833	7	3	p`= 0.04	P = 0.75	[LUT,GRMZM2G012966] [LUT,GRMZM2G300348] [BC,GRMZM2G012966]
0.025 0.025 0.025	interval	2	D:\RST\Gene100_7.csv	180	2.926068199	7	2	p`= 0.05	P = 0.5	[LUT,GRMZM2G012966] [BC,GRMZM2G012966]
0.025 0.025 0.025	interval	2	D:\RST\Gene100_8.csv	177	3.708658715	7	2	p`= 0.05	P = 0.5	[GRMZM2G012966,LUT] [BC,GRMZM2G012966]
0.025 0.025 0.025	interval	2	D:\RST\Gene100_9.csv	162	3.357942001	5	1	p`= 0.04	P = 0.25	[LUT,GRMZM2G012966]
0.025 0.025 0.025	interval	2	D:\RST\Gene100_10.csv	177	3.13136605	7	2	p`= 0.05	P = 0.5	[LUT,GRMZM2G012966] [BC,GRMZM2G012966]
0.02 0.01 0.01	interval	2	D:\RST\Gene100_1.csv	316	5.444396818	8	2	p`= 0.06	P = 0.5	[LUT,GRMZM2G012966] [BC,GRMZM2G012966]
0.02 0.01 0.01	interval	2	D:\RST\Gene100_2.csv	337	5.9222513	10	2	p`= 0.08	P = 0.5	[LUT,GRMZM2G012966] [BC,GRMZM2G012966]
0.02 0.01 0.01	interval	2	D:\RST\Gene100_3.csv	265	4.222504783	12	3	p`= 0.09	P = 0.75	[LUT,GRMZM2G012966] [LUT,GRMZM2G300348] [BC,GRMZM2G012966]
0.02 0.01 0.01	interval	2	D:\RST\Gene100_4.csv	395	6.204003119	9	3	p`= 0.06	P = 0.75	[GRMZM2G012966,LUT] [Bcry,GRMZM2G152135] [BC,GRMZM2G012966]
0.02 0.01 0.01	interval	2	D:\RST\Gene100_5.csv	316	5.301205969	10	2	p`= 0.08	P = 0.5	[LUT,GRMZM2G012966] [LUT,GRMZM2G300348]
0.02 0.01 0.01	interval	2	D:\RST\Gene100_6.csv	356	5.882734235	9	3	p`= 0.06	P = 0.75	[LUT,GRMZM2G012966] [LUT,GRMZM2G300348] [BC,GRMZM2G012966]
0.02 0.01 0.01	interval	2	D:\RST\Gene100_7.csv	339	5.507428535	10	3	p`= 0.07	P = 0.75	[LUT,GRMZM2G012966] [LUT,GRMZM2G300348] [BC,GRMZM2G012966]
0.02 0.01 0.01	interval	2	D:\RST\Gene100_8.csv	368	6.085121632	10	3	p`= 0.07	P = 0.75	[GRMZM2G300348,LUT] [GRMZM2G012966,LUT] [BC,GRMZM2G012966]
0.02 0.01 0.01	interval	2	D:\RST\Gene100_9.csv	330	5.7360309	8	2	p`= 0.06	P = 0.5	[LUT,GRMZM2G012966] [BC,GRMZM2G012966]
0.02 0.01 0.01	interval	2	D:\RST\Gene100_10.csv	340	5.463270183	10	3	p`= 0.07	P = 0.75	[ZEA,GRMZM2G152135] [LUT,GRMZM2G012966] [BC,GRMZM2G012966]
