# Supplementary material for: Verification of Three-Phase Dependency Analysis Bayesian Network Learning Method for Maize Carotenoid Gene Mining
Source: Biomed Res Int. 2017 Jul 30;2017:1813494. doi: 10.1155/2017/1813494 (PMC5554554; doi:10.1155/2017/1813494)
Supplement: Supplementary file 1 — The experiment data 1 of 109 nodes, the experiment data 2 of 109 nodes, and so on are shown here. [file 1813494.f1.zip › Supplementary material/TPDA-Quantile.csv]

Thresholds	Discretization methods	Discretization value	Input	All the edge number	Time(s)	Number of edges about 5 component traits	Number of edges between 4 genes and 5 component traits	Ratio of other 100 genes	Ratio of 4 genes	Edges between 4 genes and 5 component
0.01 0.01 0.01	quantile	8	D:\RST\Gene100_1.csv	529	16.81276712	28	5	p`= 0.23	P = 1.25	[ZEA,GRMZM2G152135] [LUT,GRMZM2G012966] [LUT,GRMZM2G300348] [BC,GRMZM2G012966] [AC,GRMZM2G152135]
0.01 0.01 0.01	quantile	8	D:\RST\Gene100_2.csv	593	18.67517529	25	6	p`= 0.19	P = 1.5	[ZEA,GRMZM2G152135] [LUT,GRMZM2G012966] [LUT,GRMZM2G300348] [Bcry,GRMZM2G152135] [BC,GRMZM2G012966] [BC,GRMZM2G152135]
0.01 0.01 0.01	quantile	8	D:\RST\Gene100_3.csv	474	14.78960743	30	5	p`= 0.25	P = 1.25	[ZEA,GRMZM2G152135] [LUT,GRMZM2G012966] [LUT,GRMZM2G300348] [BC,GRMZM2G012966] [AC,GRMZM2G152135]
0.01 0.01 0.01	quantile	8	D:\RST\Gene100_4.csv	638	18.39375242	26	5	p`= 0.21	P = 1.25	[ZEA,GRMZM2G152135] [LUT,GRMZM2G012966] [LUT,GRMZM2G300348] [BC,GRMZM2G012966] [AC,GRMZM2G152135]
0.01 0.01 0.01	quantile	8	D:\RST\Gene100_5.csv	549	17.38083902	22	6	p`= 0.16	P = 1.5	[ZEA,GRMZM2G152135] [LUT,GRMZM2G012966] [LUT,GRMZM2G300348] [BC,GRMZM2G012966] [BC,GRMZM2G152135] [AC,GRMZM2G152135]
0.01 0.01 0.01	quantile	8	D:\RST\Gene100_6.csv	568	17.09505442	28	7	p`= 0.21	P = 1.75	[ZEA,GRMZM2G152135] [LUT,GRMZM2G012966] [LUT,GRMZM2G300348] [Bcry,GRMZM2G152135] [BC,GRMZM2G012966] [BC,GRMZM2G152135] [AC,GRMZM2G152135]
0.01 0.01 0.01	quantile	8	D:\RST\Gene100_7.csv
0.01 0.01 0.01	quantile	8	D:\RST\Gene100_8.csv	558	17.3825464	29	7	p`= 0.22	P = 1.75	[ZEA,GRMZM2G152135] [LUT,GRMZM2G012966] [LUT,GRMZM2G300348] [Bcry,GRMZM2G152135] [Bcry,GRMZM2G108457] [BC,GRMZM2G012966] [BC,GRMZM2G152135]
0.01 0.01 0.01	quantile	8	D:\RST\Gene100_9.csv	591	18.05879278	19	5	p`= 0.14	P = 1.25	[ZEA,GRMZM2G152135] [LUT,GRMZM2G012966] [LUT,GRMZM2G300348] [BC,GRMZM2G012966] [AC,GRMZM2G152135]
0.015 0.015 0.015	quantile	8	D:\RST\Gene100_1.csv	346	11.18508904	17	4	p`= 0.13	P = 1	[ZEA,GRMZM2G152135] [LUT,GRMZM2G012966] [LUT,GRMZM2G300348] [BC,GRMZM2G012966]
0.015 0.015 0.015	quantile	8	D:\RST\Gene100_2.csv	364	12.59330305	18	4	p`= 0.14	P = 1	[ZEA,GRMZM2G152135] [LUT,GRMZM2G012966] [LUT,GRMZM2G300348] [BC,GRMZM2G012966]
0.015 0.015 0.015	quantile	8	D:\RST\Gene100_3.csv	312	9.244467799	16	4	p`= 0.12	P = 1	[ZEA,GRMZM2G152135] [LUT,GRMZM2G012966] [LUT,GRMZM2G300348] [BC,GRMZM2G012966]
0.015 0.015 0.015	quantile	8	D:\RST\Gene100_4.csv	398	12.02798111	14	4	p`= 0.1	P = 1	[ZEA,GRMZM2G152135] [LUT,GRMZM2G012966] [LUT,GRMZM2G300348] [BC,GRMZM2G012966]
0.015 0.015 0.015	quantile	8	D:\RST\Gene100_5.csv	354	11.76293998	18	5	p`= 0.13	P = 1.25	[LUT,GRMZM2G012966] [LUT,GRMZM2G300348] [BC,GRMZM2G012966] [BC,GRMZM2G152135] [AC,GRMZM2G152135]
0.015 0.015 0.015	quantile	8	D:\RST\Gene100_6.csv	363	11.18957565	16	5	p`= 0.11	P = 1.25	[ZEA,GRMZM2G152135] [LUT,GRMZM2G012966] [LUT,GRMZM2G300348] [BC,GRMZM2G012966] [AC,GRMZM2G152135]
0.015 0.015 0.015	quantile	8	D:\RST\Gene100_7.csv
0.015 0.015 0.015	quantile	8	D:\RST\Gene100_8.csv	343	10.82725735	17	4	p`= 0.13	P = 1	[ZEA,GRMZM2G152135] [LUT,GRMZM2G012966] [LUT,GRMZM2G300348] [BC,GRMZM2G012966]
0.015 0.015 0.015	quantile	8	D:\RST\Gene100_9.csv	371	11.89589881	13	4	p`= 0.09	P = 1	[ZEA,GRMZM2G152135] [LUT,GRMZM2G012966] [LUT,GRMZM2G300348] [BC,GRMZM2G012966]
0.02 0.02 0.02	quantile	8	D:\RST\Gene100_1.csv	233	8.128705466	13	3	p`= 0.1	P = 0.75	[LUT,GRMZM2G012966] [LUT,GRMZM2G300348] [BC,GRMZM2G012966]
0.02 0.02 0.02	quantile	8	D:\RST\Gene100_2.csv	266	8.531596518	11	3	p`= 0.08	P = 0.75	[LUT,GRMZM2G012966] [LUT,GRMZM2G300348] [BC,GRMZM2G012966]
0.02 0.02 0.02	quantile	8	D:\RST\Gene100_3.csv	215	6.174560551	13	4	p`= 0.09	P = 1	[LUT,GRMZM2G012966] [LUT,GRMZM2G300348] [Bcry,GRMZM2G152135] [BC,GRMZM2G012966]
0.02 0.02 0.02	quantile	8	D:\RST\Gene100_4.csv	255	7.4999753	10	4	p`= 0.06	P = 1	[ZEA,GRMZM2G152135] [LUT,GRMZM2G012966] [LUT,GRMZM2G300348] [BC,GRMZM2G012966]
0.02 0.02 0.02	quantile	8	D:\RST\Gene100_5.csv	256	7.708533335	15	5	p`= 0.1	P = 1.25	[LUT,GRMZM2G012966] [LUT,GRMZM2G300348] [BC,GRMZM2G012966] [BC,GRMZM2G152135] [AC,GRMZM2G152135]
0.02 0.02 0.02	quantile	8	D:\RST\Gene100_6.csv	259	7.389879266	10	3	p`= 0.07	P = 0.75	[LUT,GRMZM2G012966] [LUT,GRMZM2G300348] [BC,GRMZM2G012966]
0.02 0.02 0.02	quantile	8	D:\RST\Gene100_7.csv
0.02 0.02 0.02	quantile	8	D:\RST\Gene100_8.csv	234	7.438482531	10	4	p`= 0.06	P = 1	[ZEA,GRMZM2G152135] [LUT,GRMZM2G012966] [LUT,GRMZM2G300348] [BC,GRMZM2G012966]
0.02 0.02 0.02	quantile	8	D:\RST\Gene100_9.csv	264	8.177204935	10	3	p`= 0.07	P = 0.75	[LUT,GRMZM2G012966] [LUT,GRMZM2G300348] [BC,GRMZM2G012966]
0.025 0.025 0.025	quantile	8	D:\RST\Gene100_1.csv	181	5.919227616	9	3	p`= 0.06	P = 0.75	[LUT,GRMZM2G012966] [LUT,GRMZM2G300348] [BC,GRMZM2G012966]
0.025 0.025 0.025	quantile	8	D:\RST\Gene100_2.csv	196	5.9559419	6	1	p`= 0.05	P = 0.25	[BC,GRMZM2G012966]
0.025 0.025 0.025	quantile	8	D:\RST\Gene100_3.csv	167	4.555917966	9	3	p`= 0.06	P = 0.75	[LUT,GRMZM2G012966] [LUT,GRMZM2G300348] [BC,GRMZM2G012966]
0.025 0.025 0.025	quantile	8	D:\RST\Gene100_4.csv	191	5.225247232	8	3	p`= 0.05	P = 0.75	[LUT,GRMZM2G012966] [LUT,GRMZM2G300348] [BC,GRMZM2G012966]
0.025 0.025 0.025	quantile	8	D:\RST\Gene100_5.csv	198	6.025158652	11	2	p`= 0.09	P = 0.5	[LUT,GRMZM2G012966] [BC,GRMZM2G012966]
0.025 0.025 0.025	quantile	8	D:\RST\Gene100_6.csv	196	5.515333283	7	3	p`= 0.04	P = 0.75	[LUT,GRMZM2G012966] [LUT,GRMZM2G300348] [BC,GRMZM2G012966]
0.025 0.025 0.025	quantile	8	D:\RST\Gene100_7.csv
0.025 0.025 0.025	quantile	8	D:\RST\Gene100_8.csv	165	5.130888132	9	3	p`= 0.06	P = 0.75	[LUT,GRMZM2G012966] [LUT,GRMZM2G300348] [BC,GRMZM2G012966]
0.025 0.025 0.025	quantile	8	D:\RST\Gene100_9.csv	173	5.920932337	8	3	p`= 0.05	P = 0.75	[LUT,GRMZM2G012966] [LUT,GRMZM2G300348] [BC,GRMZM2G012966]
0.02 0.01 0.01	quantile	8	D:\RST\Gene100_1.csv	335	8.619481901	19	3	p`= 0.16	P = 0.75	[LUT,GRMZM2G012966] [LUT,GRMZM2G300348] [BC,GRMZM2G012966]
0.02 0.01 0.01	quantile	8	D:\RST\Gene100_2.csv	381	9.016117783	18	4	p`= 0.14	P = 1	[ZEA,GRMZM2G152135] [LUT,GRMZM2G012966] [LUT,GRMZM2G300348] [BC,GRMZM2G012966]
0.02 0.01 0.01	quantile	8	D:\RST\Gene100_3.csv	311	6.657510253	22	4	p`= 0.18	P = 1	[LUT,GRMZM2G012966] [LUT,GRMZM2G300348] [Bcry,GRMZM2G152135] [BC,GRMZM2G012966]
0.02 0.01 0.01	quantile	8	D:\RST\Gene100_4.csv	377	8.485346186	20	4	p`= 0.16	P = 1	[ZEA,GRMZM2G152135] [LUT,GRMZM2G012966] [LUT,GRMZM2G300348] [BC,GRMZM2G012966]
0.02 0.01 0.01	quantile	8	D:\RST\Gene100_5.csv	368	8.734576833	19	5	p`= 0.14	P = 1.25	[LUT,GRMZM2G012966] [LUT,GRMZM2G300348] [BC,GRMZM2G012966] [BC,GRMZM2G152135] [AC,GRMZM2G152135]
0.02 0.01 0.01	quantile	8	D:\RST\Gene100_6.csv	361	7.948621917	19	3	p`= 0.16	P = 0.75	[LUT,GRMZM2G012966] [LUT,GRMZM2G300348] [BC,GRMZM2G012966]
0.02 0.01 0.01	quantile	8	D:\RST\Gene100_7.csv
0.02 0.01 0.01	quantile	8	D:\RST\Gene100_8.csv	342	7.93758138	17	4	p`= 0.13	P = 1	[ZEA,GRMZM2G152135] [LUT,GRMZM2G012966] [LUT,GRMZM2G300348] [BC,GRMZM2G012966]
0.02 0.01 0.01	quantile	8	D:\RST\Gene100_9.csv	385	8.726346985	15	3	p`= 0.12	P = 0.75	[LUT,GRMZM2G012966] [LUT,GRMZM2G300348] [BC,GRMZM2G012966]
0.01 0.01 0.01	quantile	7	D:\RST\Gene100_1.csv	541	17.93490208	24	7	p`= 0.17	P = 1.75	[ZEA,GRMZM2G152135] [LUT,GRMZM2G012966] [LUT,GRMZM2G300348] [Bcry,GRMZM2G152135] [BC,GRMZM2G012966] [BC,GRMZM2G152135] [AC,GRMZM2G152135]
0.01 0.01 0.01	quantile	7	D:\RST\Gene100_2.csv	590	19.08793966	27	7	p`= 0.2	P = 1.75	[ZEA,GRMZM2G152135] [LUT,GRMZM2G012966] [LUT,GRMZM2G300348] [Bcry,GRMZM2G152135] [BC,GRMZM2G012966] [BC,GRMZM2G152135] [AC,GRMZM2G152135]
0.01 0.01 0.01	quantile	7	D:\RST\Gene100_3.csv	488	15.60370827	30	8	p`= 0.22	P = 2	[ZEA,GRMZM2G152135] [LUT,GRMZM2G012966] [LUT,GRMZM2G300348] [Bcry,GRMZM2G152135] [Bcry,GRMZM2G108457] [BC,GRMZM2G012966] [BC,GRMZM2G152135] [AC,GRMZM2G152135]
0.01 0.01 0.01	quantile	7	D:\RST\Gene100_4.csv	631	18.9243019	21	5	p`= 0.16	P = 1.25	[ZEA,GRMZM2G152135] [LUT,GRMZM2G012966] [LUT,GRMZM2G300348] [BC,GRMZM2G012966] [AC,GRMZM2G152135]
0.01 0.01 0.01	quantile	7	D:\RST\Gene100_5.csv	567	18.64474943	27	8	p`= 0.19	P = 2	[ZEA,GRMZM2G152135] [LUT,GRMZM2G012966] [LUT,GRMZM2G300348] [Bcry,GRMZM2G108457] [Bcry,GRMZM2G152135] [BC,GRMZM2G012966] [BC,GRMZM2G152135] [AC,GRMZM2G152135]
0.01 0.01 0.01	quantile	7	D:\RST\Gene100_6.csv	557	17.06770845	28	7	p`= 0.21	P = 1.75	[ZEA,GRMZM2G152135] [LUT,GRMZM2G012966] [LUT,GRMZM2G300348] [Bcry,GRMZM2G152135] [BC,GRMZM2G012966] [BC,GRMZM2G152135] [AC,GRMZM2G152135]
0.01 0.01 0.01	quantile	7	D:\RST\Gene100_7.csv	561	17.6559833	28	7	p`= 0.21	P = 1.75	[ZEA,GRMZM2G152135] [LUT,GRMZM2G012966] [LUT,GRMZM2G300348] [Bcry,GRMZM2G152135] [BC,GRMZM2G012966] [BC,GRMZM2G152135] [AC,GRMZM2G152135]
0.01 0.01 0.01	quantile	7	D:\RST\Gene100_8.csv	566	16.9596411	30	8	p`= 0.22	P = 2	[ZEA,GRMZM2G152135] [LUT,GRMZM2G012966] [LUT,GRMZM2G300348] [Bcry,GRMZM2G152135] [Bcry,GRMZM2G108457] [BC,GRMZM2G012966] [BC,GRMZM2G152135] [AC,GRMZM2G152135]
0.01 0.01 0.01	quantile	7	D:\RST\Gene100_9.csv	590	18.14140753	22	7	p`= 0.15	P = 1.75	[ZEA,GRMZM2G152135] [LUT,GRMZM2G012966] [LUT,GRMZM2G300348] [Bcry,GRMZM2G152135] [BC,GRMZM2G012966] [BC,GRMZM2G152135] [AC,GRMZM2G152135]
0.015 0.015 0.015	quantile	7	D:\RST\Gene100_1.csv	349	11.70258569	18	4	p`= 0.14	P = 1	[ZEA,GRMZM2G152135] [LUT,GRMZM2G012966] [LUT,GRMZM2G300348] [BC,GRMZM2G012966]
0.015 0.015 0.015	quantile	7	D:\RST\Gene100_2.csv	382	12.4772663	18	4	p`= 0.14	P = 1	[ZEA,GRMZM2G152135] [LUT,GRMZM2G012966] [LUT,GRMZM2G300348] [BC,GRMZM2G012966]
0.015 0.015 0.015	quantile	7	D:\RST\Gene100_3.csv	316	9.451158484	19	5	p`= 0.14	P = 1.25	[ZEA,GRMZM2G152135] [LUT,GRMZM2G012966] [LUT,GRMZM2G300348] [BC,GRMZM2G012966] [AC,GRMZM2G152135]
0.015 0.015 0.015	quantile	7	D:\RST\Gene100_4.csv	396	12.23101335	14	4	p`= 0.1	P = 1	[ZEA,GRMZM2G152135] [LUT,GRMZM2G012966] [LUT,GRMZM2G300348] [BC,GRMZM2G012966]
0.015 0.015 0.015	quantile	7	D:\RST\Gene100_5.csv	351	11.59243565	16	5	p`= 0.11	P = 1.25	[LUT,GRMZM2G012966] [LUT,GRMZM2G300348] [BC,GRMZM2G012966] [BC,GRMZM2G152135] [AC,GRMZM2G152135]
0.015 0.015 0.015	quantile	7	D:\RST\Gene100_6.csv	366	11.19982202	14	3	p`= 0.11	P = 0.75	[LUT,GRMZM2G012966] [LUT,GRMZM2G300348] [BC,GRMZM2G012966]
0.015 0.015 0.015	quantile	7	D:\RST\Gene100_7.csv	354	11.48819652	19	6	p`= 0.13	P = 1.5	[ZEA,GRMZM2G152135] [LUT,GRMZM2G012966] [LUT,GRMZM2G300348] [BC,GRMZM2G012966] [BC,GRMZM2G152135] [AC,GRMZM2G152135]
0.015 0.015 0.015	quantile	7	D:\RST\Gene100_8.csv	348	10.46551112	17	4	p`= 0.13	P = 1	[ZEA,GRMZM2G152135] [LUT,GRMZM2G012966] [LUT,GRMZM2G300348] [BC,GRMZM2G012966]
0.015 0.015 0.015	quantile	7	D:\RST\Gene100_9.csv	367	11.54777087	15	5	p`= 0.1	P = 1.25	[ZEA,GRMZM2G152135] [LUT,GRMZM2G012966] [LUT,GRMZM2G300348] [BC,GRMZM2G012966] [AC,GRMZM2G152135]
0.02 0.02 0.02	quantile	7	D:\RST\Gene100_1.csv	241	7.563202016	11	3	p`= 0.08	P = 0.75	[LUT,GRMZM2G012966] [LUT,GRMZM2G300348] [BC,GRMZM2G012966]
0.02 0.02 0.02	quantile	7	D:\RST\Gene100_2.csv	272	8.271648602	8	3	p`= 0.05	P = 0.75	[LUT,GRMZM2G012966] [LUT,GRMZM2G300348] [BC,GRMZM2G012966]
0.02 0.02 0.02	quantile	7	D:\RST\Gene100_3.csv	215	6.051435467	11	3	p`= 0.08	P = 0.75	[LUT,GRMZM2G012966] [LUT,GRMZM2G300348] [BC,GRMZM2G012966]
0.02 0.02 0.02	quantile	7	D:\RST\Gene100_4.csv	266	7.596275616	7	3	p`= 0.04	P = 0.75	[LUT,GRMZM2G012966] [LUT,GRMZM2G300348] [BC,GRMZM2G012966]
0.02 0.02 0.02	quantile	7	D:\RST\Gene100_5.csv	259	7.824802101	14	4	p`= 0.1	P = 1	[LUT,GRMZM2G012966] [LUT,GRMZM2G300348] [BC,GRMZM2G012966] [BC,GRMZM2G152135]
0.02 0.02 0.02	quantile	7	D:\RST\Gene100_6.csv	252	7.533400551	8	3	p`= 0.05	P = 0.75	[LUT,GRMZM2G012966] [LUT,GRMZM2G300348] [BC,GRMZM2G012966]
0.02 0.02 0.02	quantile	7	D:\RST\Gene100_7.csv	262	7.569373699	12	3	p`= 0.09	P = 0.75	[LUT,GRMZM2G012966] [LUT,GRMZM2G300348] [BC,GRMZM2G012966]
0.02 0.02 0.02	quantile	7	D:\RST\Gene100_8.csv	232	7.129960247	10	4	p`= 0.06	P = 1	[ZEA,GRMZM2G152135] [LUT,GRMZM2G012966] [LUT,GRMZM2G300348] [BC,GRMZM2G012966]
0.02 0.02 0.02	quantile	7	D:\RST\Gene100_9.csv	255	8.030791887	11	3	p`= 0.08	P = 0.75	[LUT,GRMZM2G012966] [LUT,GRMZM2G300348] [BC,GRMZM2G012966]
0.025 0.025 0.025	quantile	7	D:\RST\Gene100_1.csv	193	5.335459669	11	3	p`= 0.08	P = 0.75	[LUT,GRMZM2G012966] [LUT,GRMZM2G300348] [BC,GRMZM2G012966]
0.025 0.025 0.025	quantile	7	D:\RST\Gene100_2.csv	196	5.793084852	7	1	p`= 0.06	P = 0.25	[BC,GRMZM2G012966]
0.025 0.025 0.025	quantile	7	D:\RST\Gene100_3.csv	160	4.4451153	10	3	p`= 0.07	P = 0.75	[LUT,GRMZM2G012966] [LUT,GRMZM2G300348] [BC,GRMZM2G012966]
0.025 0.025 0.025	quantile	7	D:\RST\Gene100_4.csv	190	5.252357451	8	3	p`= 0.05	P = 0.75	[LUT,GRMZM2G012966] [LUT,GRMZM2G300348] [BC,GRMZM2G012966]
0.025 0.025 0.025	quantile	7	D:\RST\Gene100_5.csv	198	6.075057467	11	2	p`= 0.09	P = 0.5	[LUT,GRMZM2G012966] [BC,GRMZM2G012966]
0.025 0.025 0.025	quantile	7	D:\RST\Gene100_6.csv	189	5.132956084	10	3	p`= 0.07	P = 0.75	[LUT,GRMZM2G012966] [LUT,GRMZM2G300348] [BC,GRMZM2G012966]
0.025 0.025 0.025	quantile	7	D:\RST\Gene100_7.csv	193	5.33044335	9	3	p`= 0.06	P = 0.75	[LUT,GRMZM2G012966] [LUT,GRMZM2G300348] [BC,GRMZM2G012966]
0.025 0.025 0.025	quantile	7	D:\RST\Gene100_8.csv	168	4.981169983	8	2	p`= 0.06	P = 0.5	[LUT,GRMZM2G012966] [BC,GRMZM2G012966]
0.025 0.025 0.025	quantile	7	D:\RST\Gene100_9.csv	174	5.716197781	6	2	p`= 0.04	P = 0.5	[LUT,GRMZM2G300348] [BC,GRMZM2G012966]
0.02 0.01 0.01	quantile	7	D:\RST\Gene100_1.csv	341	8.516336751	18	3	p`= 0.15	P = 0.75	[LUT,GRMZM2G012966] [LUT,GRMZM2G300348] [BC,GRMZM2G012966]
0.02 0.01 0.01	quantile	7	D:\RST\Gene100_2.csv	384	9.563202767	18	4	p`= 0.14	P = 1	[ZEA,GRMZM2G152135] [LUT,GRMZM2G012966] [LUT,GRMZM2G300348] [BC,GRMZM2G012966]
0.02 0.01 0.01	quantile	7	D:\RST\Gene100_3.csv	315	6.476602952	23	3	p`= 0.2	P = 0.75	[LUT,GRMZM2G012966] [LUT,GRMZM2G300348] [BC,GRMZM2G012966]
0.02 0.01 0.01	quantile	7	D:\RST\Gene100_4.csv	387	8.254869517	17	4	p`= 0.13	P = 1	[ZEA,GRMZM2G152135] [LUT,GRMZM2G012966] [LUT,GRMZM2G300348] [BC,GRMZM2G012966]
0.02 0.01 0.01	quantile	7	D:\RST\Gene100_5.csv	358	8.405697616	21	5	p`= 0.16	P = 1.25	[ZEA,GRMZM2G152135] [LUT,GRMZM2G012966] [LUT,GRMZM2G300348] [BC,GRMZM2G012966] [BC,GRMZM2G152135]
0.02 0.01 0.01	quantile	7	D:\RST\Gene100_6.csv	361	7.760247616	16	3	p`= 0.13	P = 0.75	[LUT,GRMZM2G012966] [LUT,GRMZM2G300348] [BC,GRMZM2G012966]
0.02 0.01 0.01	quantile	7	D:\RST\Gene100_7.csv	369	8.139063835	17	3	p`= 0.14	P = 0.75	[LUT,GRMZM2G012966] [LUT,GRMZM2G300348] [BC,GRMZM2G012966]
0.02 0.01 0.01	quantile	7	D:\RST\Gene100_8.csv	329	7.441926281	20	4	p`= 0.16	P = 1	[ZEA,GRMZM2G152135] [LUT,GRMZM2G012966] [LUT,GRMZM2G300348] [BC,GRMZM2G012966]
0.02 0.01 0.01	quantile	7	D:\RST\Gene100_9.csv	380	8.561482732	17	3	p`= 0.14	P = 0.75	[LUT,GRMZM2G012966] [LUT,GRMZM2G300348] [BC,GRMZM2G012966]
0.01 0.01 0.01	quantile	6	D:\RST\Gene100_1.csv	526	16.57898988	30	7	p`= 0.23	P = 1.75	[ZEA,GRMZM2G152135] [LUT,GRMZM2G012966] [LUT,GRMZM2G300348] [Bcry,GRMZM2G152135] [BC,GRMZM2G012966] [BC,GRMZM2G152135] [AC,GRMZM2G152135]
0.01 0.01 0.01	quantile	6	D:\RST\Gene100_2.csv	568	17.74276636	26	7	p`= 0.19	P = 1.75	[ZEA,GRMZM2G152135] [LUT,GRMZM2G012966] [LUT,GRMZM2G300348] [Bcry,GRMZM2G152135] [BC,GRMZM2G012966] [BC,GRMZM2G152135] [AC,GRMZM2G152135]
0.01 0.01 0.01	quantile	6	D:\RST\Gene100_3.csv	464	14.47389167	27	5	p`= 0.22	P = 1.25	[ZEA,GRMZM2G152135] [LUT,GRMZM2G012966] [LUT,GRMZM2G300348] [BC,GRMZM2G012966] [AC,GRMZM2G152135]
0.01 0.01 0.01	quantile	6	D:\RST\Gene100_4.csv	622	17.7930265	22	5	p`= 0.17	P = 1.25	[ZEA,GRMZM2G152135] [LUT,GRMZM2G012966] [LUT,GRMZM2G300348] [BC,GRMZM2G012966] [AC,GRMZM2G152135]
0.01 0.01 0.01	quantile	6	D:\RST\Gene100_5.csv	547	17.93718206	24	7	p`= 0.17	P = 1.75	[ZEA,GRMZM2G152135] [LUT,GRMZM2G012966] [LUT,GRMZM2G300348] [Bcry,GRMZM2G108457] [BC,GRMZM2G012966] [BC,GRMZM2G152135] [AC,GRMZM2G152135]
0.01 0.01 0.01	quantile	6	D:\RST\Gene100_6.csv	546	16.97119273	27	5	p`= 0.22	P = 1.25	[ZEA,GRMZM2G152135] [LUT,GRMZM2G012966] [LUT,GRMZM2G300348] [BC,GRMZM2G012966] [AC,GRMZM2G152135]
0.01 0.01 0.01	quantile	6	D:\RST\Gene100_7.csv	567	18.04590997	28	7	p`= 0.21	P = 1.75	[ZEA,GRMZM2G152135] [LUT,GRMZM2G012966] [LUT,GRMZM2G300348] [Bcry,GRMZM2G152135] [BC,GRMZM2G012966] [BC,GRMZM2G152135] [AC,GRMZM2G152135]
0.01 0.01 0.01	quantile	6	D:\RST\Gene100_8.csv	555	16.51796927	29	6	p`= 0.23	P = 1.5	[ZEA,GRMZM2G152135] [LUT,GRMZM2G012966] [LUT,GRMZM2G300348] [Bcry,GRMZM2G108457] [BC,GRMZM2G012966] [AC,GRMZM2G152135]
0.01 0.01 0.01	quantile	6	D:\RST\Gene100_9.csv	587	18.1196116	22	7	p`= 0.15	P = 1.75	[ZEA,GRMZM2G152135] [LUT,GRMZM2G012966] [LUT,GRMZM2G300348] [Bcry,GRMZM2G152135] [BC,GRMZM2G012966] [BC,GRMZM2G152135] [AC,GRMZM2G152135]
0.015 0.015 0.015	quantile	6	D:\RST\Gene100_1.csv	336	11.10965621	18	4	p`= 0.14	P = 1	[LUT,GRMZM2G012966] [LUT,GRMZM2G300348] [Bcry,GRMZM2G152135] [BC,GRMZM2G012966]
0.015 0.015 0.015	quantile	6	D:\RST\Gene100_2.csv	369	11.94906317	14	4	p`= 0.1	P = 1	[ZEA,GRMZM2G152135] [LUT,GRMZM2G012966] [LUT,GRMZM2G300348] [BC,GRMZM2G012966]
0.015 0.015 0.015	quantile	6	D:\RST\Gene100_3.csv	304	9.172248884	16	4	p`= 0.12	P = 1	[LUT,GRMZM2G012966] [LUT,GRMZM2G300348] [BC,GRMZM2G012966] [AC,GRMZM2G152135]
0.015 0.015 0.015	quantile	6	D:\RST\Gene100_4.csv	394	11.30158658	12	5	p`= 0.07	P = 1.25	[ZEA,GRMZM2G152135] [LUT,GRMZM2G012966] [LUT,GRMZM2G300348] [BC,GRMZM2G012966] [AC,GRMZM2G152135]
0.015 0.015 0.015	quantile	6	D:\RST\Gene100_5.csv	342	11.16713712	17	5	p`= 0.12	P = 1.25	[LUT,GRMZM2G012966] [LUT,GRMZM2G300348] [BC,GRMZM2G012966] [BC,GRMZM2G152135] [AC,GRMZM2G152135]
0.015 0.015 0.015	quantile	6	D:\RST\Gene100_6.csv	349	10.67760265	14	4	p`= 0.1	P = 1	[ZEA,GRMZM2G152135] [LUT,GRMZM2G012966] [LUT,GRMZM2G300348] [BC,GRMZM2G012966]
0.015 0.015 0.015	quantile	6	D:\RST\Gene100_7.csv	347	11.44422388	17	5	p`= 0.12	P = 1.25	[ZEA,GRMZM2G152135] [LUT,GRMZM2G012966] [LUT,GRMZM2G300348] [BC,GRMZM2G012966] [AC,GRMZM2G152135]
0.015 0.015 0.015	quantile	6	D:\RST\Gene100_8.csv	335	10.40875003	18	5	p`= 0.13	P = 1.25	[ZEA,GRMZM2G152135] [LUT,GRMZM2G012966] [LUT,GRMZM2G300348] [Bcry,GRMZM2G108457] [BC,GRMZM2G012966]
0.015 0.015 0.015	quantile	6	D:\RST\Gene100_9.csv	352	11.58477825	14	4	p`= 0.1	P = 1	[ZEA,GRMZM2G152135] [LUT,GRMZM2G012966] [LUT,GRMZM2G300348] [BC,GRMZM2G012966]
0.02 0.02 0.02	quantile	6	D:\RST\Gene100_1.csv	230	7.884772881	12	3	p`= 0.09	P = 0.75	[LUT,GRMZM2G012966] [LUT,GRMZM2G300348] [BC,GRMZM2G012966]
0.02 0.02 0.02	quantile	6	D:\RST\Gene100_2.csv	262	8.133231767	8	3	p`= 0.05	P = 0.75	[LUT,GRMZM2G012966] [LUT,GRMZM2G300348] [BC,GRMZM2G012966]
0.02 0.02 0.02	quantile	6	D:\RST\Gene100_3.csv	219	6.240623486	12	4	p`= 0.08	P = 1	[LUT,GRMZM2G012966] [LUT,GRMZM2G300348] [Bcry,GRMZM2G152135] [BC,GRMZM2G012966]
0.02 0.02 0.02	quantile	6	D:\RST\Gene100_4.csv	263	7.647771835	9	3	p`= 0.06	P = 0.75	[LUT,GRMZM2G012966] [LUT,GRMZM2G300348] [BC,GRMZM2G012966]
0.02 0.02 0.02	quantile	6	D:\RST\Gene100_5.csv	247	7.835433964	15	4	p`= 0.11	P = 1	[LUT,GRMZM2G012966] [LUT,GRMZM2G300348] [BC,GRMZM2G012966] [BC,GRMZM2G152135]
0.02 0.02 0.02	quantile	6	D:\RST\Gene100_6.csv	254	7.479187616	11	3	p`= 0.08	P = 0.75	[LUT,GRMZM2G012966] [LUT,GRMZM2G300348] [BC,GRMZM2G012966]
0.02 0.02 0.02	quantile	6	D:\RST\Gene100_7.csv	269	7.331946099	11	3	p`= 0.08	P = 0.75	[LUT,GRMZM2G012966] [LUT,GRMZM2G300348] [BC,GRMZM2G012966]
0.02 0.02 0.02	quantile	6	D:\RST\Gene100_8.csv	239	7.167122332	10	4	p`= 0.06	P = 1	[ZEA,GRMZM2G152135] [LUT,GRMZM2G012966] [LUT,GRMZM2G300348] [BC,GRMZM2G012966]
0.02 0.02 0.02	quantile	6	D:\RST\Gene100_9.csv	261	8.254714282	11	3	p`= 0.08	P = 0.75	[LUT,GRMZM2G012966] [LUT,GRMZM2G300348] [BC,GRMZM2G012966]
0.025 0.025 0.025	quantile	6	D:\RST\Gene100_1.csv	182	5.436134219	9	3	p`= 0.06	P = 0.75	[LUT,GRMZM2G012966] [LUT,GRMZM2G300348] [BC,GRMZM2G012966]
0.025 0.025 0.025	quantile	6	D:\RST\Gene100_2.csv	191	5.391504351	7	3	p`= 0.04	P = 0.75	[LUT,GRMZM2G012966] [LUT,GRMZM2G300348] [BC,GRMZM2G012966]
0.025 0.025 0.025	quantile	6	D:\RST\Gene100_3.csv	166	4.325252183	10	4	p`= 0.06	P = 1	[LUT,GRMZM2G012966] [LUT,GRMZM2G300348] [Bcry,GRMZM2G152135] [BC,GRMZM2G012966]
0.025 0.025 0.025	quantile	6	D:\RST\Gene100_4.csv	188	4.945658831	9	3	p`= 0.06	P = 0.75	[LUT,GRMZM2G012966] [LUT,GRMZM2G300348] [BC,GRMZM2G012966]
0.025 0.025 0.025	quantile	6	D:\RST\Gene100_5.csv	192	5.747073817	12	2	p`= 0.1	P = 0.5	[LUT,GRMZM2G012966] [BC,GRMZM2G012966]
0.025 0.025 0.025	quantile	6	D:\RST\Gene100_6.csv	189	5.134502419	7	3	p`= 0.04	P = 0.75	[LUT,GRMZM2G012966] [LUT,GRMZM2G300348] [BC,GRMZM2G012966]
0.025 0.025 0.025	quantile	6	D:\RST\Gene100_7.csv	195	5.357683734	11	3	p`= 0.08	P = 0.75	[LUT,GRMZM2G012966] [LUT,GRMZM2G300348] [BC,GRMZM2G012966]
0.025 0.025 0.025	quantile	6	D:\RST\Gene100_8.csv	155	4.583437936	8	3	p`= 0.05	P = 0.75	[LUT,GRMZM2G012966] [LUT,GRMZM2G300348] [BC,GRMZM2G012966]
0.025 0.025 0.025	quantile	6	D:\RST\Gene100_9.csv	179	5.825567647	9	3	p`= 0.06	P = 0.75	[LUT,GRMZM2G012966] [LUT,GRMZM2G300348] [BC,GRMZM2G012966]
0.02 0.01 0.01	quantile	6	D:\RST\Gene100_1.csv	328	8.400325549	19	3	p`= 0.16	P = 0.75	[LUT,GRMZM2G012966] [LUT,GRMZM2G300348] [BC,GRMZM2G012966]
0.02 0.01 0.01	quantile	6	D:\RST\Gene100_2.csv	373	8.953321636	17	3	p`= 0.14	P = 0.75	[LUT,GRMZM2G012966] [LUT,GRMZM2G300348] [BC,GRMZM2G012966]
0.02 0.01 0.01	quantile	6	D:\RST\Gene100_3.csv	308	6.786269085	22	4	p`= 0.18	P = 1	[ZEA,GRMZM2G152135] [LUT,GRMZM2G012966] [LUT,GRMZM2G300348] [BC,GRMZM2G012966]
0.02 0.01 0.01	quantile	6	D:\RST\Gene100_4.csv	377	8.102114534	18	4	p`= 0.14	P = 1	[ZEA,GRMZM2G152135] [LUT,GRMZM2G012966] [LUT,GRMZM2G300348] [BC,GRMZM2G012966]
0.02 0.01 0.01	quantile	6	D:\RST\Gene100_5.csv	344	8.008602897	21	4	p`= 0.17	P = 1	[LUT,GRMZM2G012966] [LUT,GRMZM2G300348] [BC,GRMZM2G012966] [BC,GRMZM2G152135]
0.02 0.01 0.01	quantile	6	D:\RST\Gene100_6.csv	352	7.855223131	16	4	p`= 0.12	P = 1	[LUT,GRMZM2G012966] [LUT,GRMZM2G300348] [Bcry,GRMZM2G152135] [BC,GRMZM2G012966]
0.02 0.01 0.01	quantile	6	D:\RST\Gene100_7.csv	361	8.213637519	14	3	p`= 0.11	P = 0.75	[LUT,GRMZM2G012966] [LUT,GRMZM2G300348] [BC,GRMZM2G012966]
0.02 0.01 0.01	quantile	6	D:\RST\Gene100_8.csv	334	7.524032803	16	4	p`= 0.12	P = 1	[ZEA,GRMZM2G152135] [LUT,GRMZM2G012966] [LUT,GRMZM2G300348] [BC,GRMZM2G012966]
0.02 0.01 0.01	quantile	6	D:\RST\Gene100_9.csv	378	8.521801333	15	3	p`= 0.12	P = 0.75	[LUT,GRMZM2G012966] [LUT,GRMZM2G300348] [BC,GRMZM2G012966]
0.01 0.01 0.01	quantile	5	D:\RST\Gene100_1.csv	519	16.79324848	27	4	p`= 0.23	P = 1	[ZEA,GRMZM2G152135] [LUT,GRMZM2G012966] [LUT,GRMZM2G300348] [BC,GRMZM2G012966]
0.01 0.01 0.01	quantile	5	D:\RST\Gene100_2.csv	575	18.06419293	24	5	p`= 0.19	P = 1.25	[ZEA,GRMZM2G152135] [LUT,GRMZM2G012966] [LUT,GRMZM2G300348] [BC,GRMZM2G012966] [AC,GRMZM2G152135]
0.01 0.01 0.01	quantile	5	D:\RST\Gene100_3.csv	456	13.94416159	28	5	p`= 0.23	P = 1.25	[ZEA,GRMZM2G152135] [LUT,GRMZM2G012966] [LUT,GRMZM2G300348] [BC,GRMZM2G012966] [AC,GRMZM2G152135]
0.01 0.01 0.01	quantile	5	D:\RST\Gene100_4.csv	624	17.83964628	23	6	p`= 0.17	P = 1.5	[ZEA,GRMZM2G152135] [LUT,GRMZM2G012966] [LUT,GRMZM2G300348] [Bcry,GRMZM2G108457] [BC,GRMZM2G012966] [AC,GRMZM2G152135]
0.01 0.01 0.01	quantile	5	D:\RST\Gene100_5.csv	545	17.6618676	23	7	p`= 0.16	P = 1.75	[ZEA,GRMZM2G152135] [LUT,GRMZM2G300348] [LUT,GRMZM2G012966] [BC,GRMZM2G012966] [BC,GRMZM2G152135] [BC,GRMZM2G108457] [AC,GRMZM2G152135]
0.01 0.01 0.01	quantile	5	D:\RST\Gene100_6.csv	541	16.51058198	24	5	p`= 0.19	P = 1.25	[ZEA,GRMZM2G152135] [LUT,GRMZM2G012966] [LUT,GRMZM2G300348] [BC,GRMZM2G012966] [AC,GRMZM2G152135]
0.01 0.01 0.01	quantile	5	D:\RST\Gene100_7.csv	539	16.93214863	27	7	p`= 0.2	P = 1.75	[ZEA,GRMZM2G152135] [LUT,GRMZM2G012966] [LUT,GRMZM2G300348] [Bcry,GRMZM2G152135] [BC,GRMZM2G012966] [BC,GRMZM2G152135] [AC,GRMZM2G152135]
0.01 0.01 0.01	quantile	5	D:\RST\Gene100_8.csv	557	16.45409115	31	8	p`= 0.23	P = 2	[ZEA,GRMZM2G152135] [LUT,GRMZM2G012966] [LUT,GRMZM2G300348] [Bcry,GRMZM2G108457] [Bcry,GRMZM2G152135] [BC,GRMZM2G012966] [BC,GRMZM2G152135] [AC,GRMZM2G152135]
0.01 0.01 0.01	quantile	5	D:\RST\Gene100_9.csv	583	17.763669	21	7	p`= 0.14	P = 1.75	[ZEA,GRMZM2G152135] [LUT,GRMZM2G012966] [LUT,GRMZM2G300348] [Bcry,GRMZM2G152135] [BC,GRMZM2G012966] [BC,GRMZM2G152135] [AC,GRMZM2G152135]
0.01 0.01 0.01	quantile	5	D:\RST\Gene100_10.csv	569	17.27556585	25	8	p`= 0.17	P = 2	[ZEA,GRMZM2G152135] [LUT,GRMZM2G012966] [LUT,GRMZM2G300348] [Bcry,GRMZM2G152135] [BC,GRMZM2G012966] [BC,GRMZM2G152135] [AC,GRMZM2G300348] [AC,GRMZM2G152135]
0.015 0.015 0.015	quantile	5	D:\RST\Gene100_1.csv	328	11.06707733	15	3	p`= 0.12	P = 0.75	[LUT,GRMZM2G012966] [LUT,GRMZM2G300348] [BC,GRMZM2G012966]
0.015 0.015 0.015	quantile	5	D:\RST\Gene100_2.csv	356	12.29016065	15	4	p`= 0.11	P = 1	[ZEA,GRMZM2G152135] [LUT,GRMZM2G012966] [LUT,GRMZM2G300348] [BC,GRMZM2G012966]
0.015 0.015 0.015	quantile	5	D:\RST\Gene100_3.csv	310	8.868880681	19	4	p`= 0.15	P = 1	[LUT,GRMZM2G012966] [LUT,GRMZM2G300348] [BC,GRMZM2G012966] [AC,GRMZM2G152135]
0.015 0.015 0.015	quantile	5	D:\RST\Gene100_4.csv	381	11.49002535	13	4	p`= 0.09	P = 1	[ZEA,GRMZM2G152135] [LUT,GRMZM2G012966] [LUT,GRMZM2G300348] [BC,GRMZM2G012966]
0.015 0.015 0.015	quantile	5	D:\RST\Gene100_5.csv	344	11.30141538	17	5	p`= 0.12	P = 1.25	[LUT,GRMZM2G300348] [LUT,GRMZM2G012966] [BC,GRMZM2G012966] [BC,GRMZM2G152135] [AC,GRMZM2G152135]
0.015 0.015 0.015	quantile	5	D:\RST\Gene100_6.csv	338	10.39487058	13	4	p`= 0.09	P = 1	[ZEA,GRMZM2G152135] [LUT,GRMZM2G012966] [LUT,GRMZM2G300348] [BC,GRMZM2G012966]
0.015 0.015 0.015	quantile	5	D:\RST\Gene100_7.csv	337	10.84514838	18	6	p`= 0.12	P = 1.5	[LUT,GRMZM2G012966] [LUT,GRMZM2G300348] [Bcry,GRMZM2G152135] [BC,GRMZM2G012966] [BC,GRMZM2G152135] [AC,GRMZM2G152135]
0.015 0.015 0.015	quantile	5	D:\RST\Gene100_8.csv	328	10.09687183	15	4	p`= 0.11	P = 1	[ZEA,GRMZM2G152135] [LUT,GRMZM2G012966] [LUT,GRMZM2G300348] [BC,GRMZM2G012966]
0.015 0.015 0.015	quantile	5	D:\RST\Gene100_9.csv	350	11.10551795	13	4	p`= 0.09	P = 1	[ZEA,GRMZM2G152135] [LUT,GRMZM2G012966] [LUT,GRMZM2G300348] [BC,GRMZM2G012966]
0.015 0.015 0.015	quantile	5	D:\RST\Gene100_10.csv	379	11.38827018	13	4	p`= 0.09	P = 1	[ZEA,GRMZM2G152135] [LUT,GRMZM2G012966] [LUT,GRMZM2G300348] [BC,GRMZM2G012966]
0.02 0.02 0.02	quantile	5	D:\RST\Gene100_1.csv	224	7.199469284	12	3	p`= 0.09	P = 0.75	[LUT,GRMZM2G012966] [LUT,GRMZM2G300348] [BC,GRMZM2G012966]
0.02 0.02 0.02	quantile	5	D:\RST\Gene100_2.csv	265	7.731902635	8	3	p`= 0.05	P = 0.75	[LUT,GRMZM2G012966] [LUT,GRMZM2G300348] [BC,GRMZM2G012966]
0.02 0.02 0.02	quantile	5	D:\RST\Gene100_3.csv	204	5.987545002	11	3	p`= 0.08	P = 0.75	[LUT,GRMZM2G012966] [LUT,GRMZM2G300348] [BC,GRMZM2G012966]
0.02 0.02 0.02	quantile	5	D:\RST\Gene100_4.csv	244	7.522444248	6	3	p`= 0.03	P = 0.75	[LUT,GRMZM2G012966] [LUT,GRMZM2G300348] [BC,GRMZM2G012966]
0.02 0.02 0.02	quantile	5	D:\RST\Gene100_5.csv	263	8.053326301	16	4	p`= 0.12	P = 1	[LUT,GRMZM2G300348] [LUT,GRMZM2G012966] [BC,GRMZM2G012966] [BC,GRMZM2G152135]
0.02 0.02 0.02	quantile	5	D:\RST\Gene100_6.csv	250	7.029081603	8	3	p`= 0.05	P = 0.75	[LUT,GRMZM2G012966] [LUT,GRMZM2G300348] [BC,GRMZM2G012966]
0.02 0.02 0.02	quantile	5	D:\RST\Gene100_7.csv	262	7.100593166	12	3	p`= 0.09	P = 0.75	[LUT,GRMZM2G012966] [LUT,GRMZM2G300348] [BC,GRMZM2G012966]
0.02 0.02 0.02	quantile	5	D:\RST\Gene100_8.csv	216	6.628171917	8	3	p`= 0.05	P = 0.75	[LUT,GRMZM2G012966] [LUT,GRMZM2G300348] [BC,GRMZM2G012966]
0.02 0.02 0.02	quantile	5	D:\RST\Gene100_9.csv	248	7.656705002	10	3	p`= 0.07	P = 0.75	[LUT,GRMZM2G012966] [LUT,GRMZM2G300348] [BC,GRMZM2G012966]
0.02 0.02 0.02	quantile	5	D:\RST\Gene100_10.csv	246	7.663153001	10	4	p`= 0.06	P = 1	[ZEA,GRMZM2G152135] [LUT,GRMZM2G012966] [LUT,GRMZM2G300348] [BC,GRMZM2G012966]
0.025 0.025 0.025	quantile	5	D:\RST\Gene100_1.csv	176	4.928252935	9	2	p`= 0.07	P = 0.5	[LUT,GRMZM2G012966] [BC,GRMZM2G012966]
0.025 0.025 0.025	quantile	5	D:\RST\Gene100_2.csv	179	5.62068462	7	3	p`= 0.04	P = 0.75	[LUT,GRMZM2G012966] [LUT,GRMZM2G300348] [BC,GRMZM2G012966]
0.025 0.025 0.025	quantile	5	D:\RST\Gene100_3.csv	157	4.262833818	9	3	p`= 0.06	P = 0.75	[LUT,GRMZM2G012966] [LUT,GRMZM2G300348] [BC,GRMZM2G012966]
0.025 0.025 0.025	quantile	5	D:\RST\Gene100_4.csv	192	5.064536365	7	3	p`= 0.04	P = 0.75	[LUT,GRMZM2G012966] [LUT,GRMZM2G300348] [BC,GRMZM2G012966]
0.025 0.025 0.025	quantile	5	D:\RST\Gene100_5.csv	186	5.784667234	12	3	p`= 0.09	P = 0.75	[LUT,GRMZM2G012966] [BC,GRMZM2G012966] [BC,GRMZM2G152135]
0.025 0.025 0.025	quantile	5	D:\RST\Gene100_6.csv	185	5.060405568	7	3	p`= 0.04	P = 0.75	[LUT,GRMZM2G012966] [LUT,GRMZM2G300348] [BC,GRMZM2G012966]
0.025 0.025 0.025	quantile	5	D:\RST\Gene100_7.csv	192	4.93198425	9	3	p`= 0.06	P = 0.75	[LUT,GRMZM2G012966] [LUT,GRMZM2G300348] [BC,GRMZM2G012966]
0.025 0.025 0.025	quantile	5	D:\RST\Gene100_8.csv	154	4.520165002	9	2	p`= 0.07	P = 0.5	[LUT,GRMZM2G300348] [BC,GRMZM2G012966]
0.025 0.025 0.025	quantile	5	D:\RST\Gene100_9.csv	173	5.304373781	8	3	p`= 0.05	P = 0.75	[LUT,GRMZM2G012966] [LUT,GRMZM2G300348] [BC,GRMZM2G012966]
0.025 0.025 0.025	quantile	5	D:\RST\Gene100_10.csv	178	5.180868181	8	3	p`= 0.05	P = 0.75	[LUT,GRMZM2G012966] [LUT,GRMZM2G300348] [BC,GRMZM2G012966]
0.02 0.01 0.01	quantile	5	D:\RST\Gene100_1.csv	323	8.312353698	18	3	p`= 0.15	P = 0.75	[LUT,GRMZM2G012966] [LUT,GRMZM2G300348] [BC,GRMZM2G012966]
0.02 0.01 0.01	quantile	5	D:\RST\Gene100_2.csv	366	9.195743235	16	4	p`= 0.12	P = 1	[ZEA,GRMZM2G152135] [LUT,GRMZM2G012966] [LUT,GRMZM2G300348] [BC,GRMZM2G012966]
0.02 0.01 0.01	quantile	5	D:\RST\Gene100_3.csv	304	6.148790252	22	3	p`= 0.19	P = 0.75	[LUT,GRMZM2G012966] [LUT,GRMZM2G300348] [BC,GRMZM2G012966]
0.02 0.01 0.01	quantile	5	D:\RST\Gene100_4.csv	357	8.133465417	17	4	p`= 0.13	P = 1	[ZEA,GRMZM2G152135] [LUT,GRMZM2G012966] [LUT,GRMZM2G300348] [BC,GRMZM2G012966]
0.02 0.01 0.01	quantile	5	D:\RST\Gene100_5.csv	357	8.405589302	20	4	p`= 0.16	P = 1	[LUT,GRMZM2G300348] [LUT,GRMZM2G012966] [BC,GRMZM2G012966] [BC,GRMZM2G152135]
0.02 0.01 0.01	quantile	5	D:\RST\Gene100_6.csv	348	7.503122115	14	3	p`= 0.11	P = 0.75	[LUT,GRMZM2G012966] [LUT,GRMZM2G300348] [BC,GRMZM2G012966]
0.02 0.01 0.01	quantile	5	D:\RST\Gene100_7.csv	351	7.731548182	16	4	p`= 0.12	P = 1	[LUT,GRMZM2G012966] [LUT,GRMZM2G300348] [Bcry,GRMZM2G152135] [BC,GRMZM2G012966]
0.02 0.01 0.01	quantile	5	D:\RST\Gene100_8.csv	318	7.164058868	16	3	p`= 0.13	P = 0.75	[LUT,GRMZM2G012966] [LUT,GRMZM2G300348] [BC,GRMZM2G012966]
0.02 0.01 0.01	quantile	5	D:\RST\Gene100_9.csv	366	8.027651751	15	3	p`= 0.12	P = 0.75	[LUT,GRMZM2G012966] [LUT,GRMZM2G300348] [BC,GRMZM2G012966]
0.02 0.01 0.01	quantile	5	D:\RST\Gene100_10.csv	358	8.090794766	12	4	p`= 0.08	P = 1	[ZEA,GRMZM2G152135] [LUT,GRMZM2G012966] [LUT,GRMZM2G300348] [BC,GRMZM2G012966]
0.01 0.01 0.01	quantile	4	D:\RST\Gene100_1.csv	516	16.03127815	31	5	p`= 0.26	P = 1.25	[ZEA,GRMZM2G152135] [LUT,GRMZM2G012966] [LUT,GRMZM2G300348] [BC,GRMZM2G012966] [AC,GRMZM2G152135]
0.01 0.01 0.01	quantile	4	D:\RST\Gene100_2.csv	551	17.63890337	25	6	p`= 0.19	P = 1.5	[ZEA,GRMZM2G152135] [LUT,GRMZM2G012966] [LUT,GRMZM2G300348] [Bcry,GRMZM2G108457] [BC,GRMZM2G012966] [AC,GRMZM2G152135]
0.01 0.01 0.01	quantile	4	D:\RST\Gene100_3.csv	442	14.35649278	26	5	p`= 0.21	P = 1.25	[ZEA,GRMZM2G152135] [LUT,GRMZM2G012966] [LUT,GRMZM2G300348] [BC,GRMZM2G012966] [AC,GRMZM2G152135]
0.01 0.01 0.01	quantile	4	D:\RST\Gene100_4.csv	584	16.97947858	22	5	p`= 0.17	P = 1.25	[ZEA,GRMZM2G152135] [LUT,GRMZM2G012966] [LUT,GRMZM2G300348] [BC,GRMZM2G012966] [AC,GRMZM2G152135]
0.01 0.01 0.01	quantile	4	D:\RST\Gene100_5.csv	520	17.09393278	22	6	p`= 0.16	P = 1.5	[ZEA,GRMZM2G152135] [LUT,GRMZM2G012966] [LUT,GRMZM2G300348] [GRMZM2G152135,AC] [BC,GRMZM2G012966] [BC,GRMZM2G152135]
0.01 0.01 0.01	quantile	4	D:\RST\Gene100_6.csv	509	15.32055917	22	6	p`= 0.16	P = 1.5	[ZEA,GRMZM2G012966] [ZEA,GRMZM2G152135] [LUT,GRMZM2G300348] [LUT,GRMZM2G012966] [BC,GRMZM2G012966] [AC,GRMZM2G152135]
0.01 0.01 0.01	quantile	4	D:\RST\Gene100_7.csv	540	16.87813617	26	8	p`= 0.18	P = 2	[ZEA,GRMZM2G152135] [LUT,GRMZM2G012966] [LUT,GRMZM2G300348] [Bcry,GRMZM2G152135] [BC,GRMZM2G012966] [BC,GRMZM2G152135] [BC,GRMZM2G108457] [AC,GRMZM2G152135]
0.01 0.01 0.01	quantile	4	D:\RST\Gene100_8.csv	522	15.59633025	25	5	p`= 0.2	P = 1.25	[ZEA,GRMZM2G152135] [LUT,GRMZM2G012966] [LUT,GRMZM2G300348] [Bcry,GRMZM2G108457] [BC,GRMZM2G012966]
0.01 0.01 0.01	quantile	4	D:\RST\Gene100_9.csv	566	16.54654485	20	5	p`= 0.15	P = 1.25	[ZEA,GRMZM2G152135] [LUT,GRMZM2G012966] [LUT,GRMZM2G300348] [BC,GRMZM2G012966] [AC,GRMZM2G152135]
0.01 0.01 0.01	quantile	4	D:\RST\Gene100_10.csv	537	16.38092953	18	4	p`= 0.14	P = 1	[ZEA,GRMZM2G152135] [LUT,GRMZM2G300348] [LUT,GRMZM2G012966] [BC,GRMZM2G012966]
0.015 0.015 0.015	quantile	4	D:\RST\Gene100_1.csv	313	10.57006145	15	3	p`= 0.12	P = 0.75	[LUT,GRMZM2G012966] [LUT,GRMZM2G300348] [BC,GRMZM2G012966]
0.015 0.015 0.015	quantile	4	D:\RST\Gene100_2.csv	338	11.43011938	15	5	p`= 0.1	P = 1.25	[ZEA,GRMZM2G152135] [LUT,GRMZM2G012966] [LUT,GRMZM2G300348] [Bcry,GRMZM2G108457] [BC,GRMZM2G012966]
0.015 0.015 0.015	quantile	4	D:\RST\Gene100_3.csv	293	8.239053734	18	4	p`= 0.14	P = 1	[ZEA,GRMZM2G152135] [LUT,GRMZM2G012966] [LUT,GRMZM2G300348] [BC,GRMZM2G012966]
0.015 0.015 0.015	quantile	4	D:\RST\Gene100_4.csv	367	10.2149106	14	4	p`= 0.1	P = 1	[ZEA,GRMZM2G152135] [LUT,GRMZM2G012966] [LUT,GRMZM2G300348] [BC,GRMZM2G012966]
0.015 0.015 0.015	quantile	4	D:\RST\Gene100_5.csv	337	10.27537047	17	5	p`= 0.12	P = 1.25	[LUT,GRMZM2G012966] [LUT,GRMZM2G300348] [GRMZM2G152135,AC] [BC,GRMZM2G012966] [BC,GRMZM2G152135]
0.015 0.015 0.015	quantile	4	D:\RST\Gene100_6.csv	333	9.606364016	12	3	p`= 0.09	P = 0.75	[LUT,GRMZM2G300348] [LUT,GRMZM2G012966] [BC,GRMZM2G012966]
0.015 0.015 0.015	quantile	4	D:\RST\Gene100_7.csv	326	10.02952268	15	4	p`= 0.11	P = 1	[LUT,GRMZM2G012966] [LUT,GRMZM2G300348] [BC,GRMZM2G012966] [AC,GRMZM2G152135]
0.015 0.015 0.015	quantile	4	D:\RST\Gene100_8.csv	310	9.363822949	15	4	p`= 0.11	P = 1	[ZEA,GRMZM2G152135] [LUT,GRMZM2G012966] [LUT,GRMZM2G300348] [BC,GRMZM2G012966]
0.015 0.015 0.015	quantile	4	D:\RST\Gene100_9.csv	355	10.44192957	13	4	p`= 0.09	P = 1	[ZEA,GRMZM2G152135] [LUT,GRMZM2G012966] [LUT,GRMZM2G300348] [BC,GRMZM2G012966]
0.015 0.015 0.015	quantile	4	D:\RST\Gene100_10.csv	352	10.58463482	14	4	p`= 0.1	P = 1	[ZEA,GRMZM2G152135] [LUT,GRMZM2G300348] [LUT,GRMZM2G012966] [BC,GRMZM2G012966]
0.02 0.02 0.02	quantile	4	D:\RST\Gene100_1.csv	230	7.175072467	9	3	p`= 0.06	P = 0.75	[LUT,GRMZM2G012966] [LUT,GRMZM2G300348] [BC,GRMZM2G012966]
0.02 0.02 0.02	quantile	4	D:\RST\Gene100_2.csv	250	7.258574299	10	3	p`= 0.07	P = 0.75	[LUT,GRMZM2G012966] [LUT,GRMZM2G300348] [BC,GRMZM2G012966]
0.02 0.02 0.02	quantile	4	D:\RST\Gene100_3.csv	192	5.363366318	10	3	p`= 0.07	P = 0.75	[LUT,GRMZM2G012966] [LUT,GRMZM2G300348] [BC,GRMZM2G012966]
0.02 0.02 0.02	quantile	4	D:\RST\Gene100_4.csv	222	6.307685868	8	3	p`= 0.05	P = 0.75	[LUT,GRMZM2G012966] [LUT,GRMZM2G300348] [BC,GRMZM2G012966]
0.02 0.02 0.02	quantile	4	D:\RST\Gene100_5.csv	241	7.054338682	12	3	p`= 0.09	P = 0.75	[LUT,GRMZM2G012966] [LUT,GRMZM2G300348] [BC,GRMZM2G012966]
0.02 0.02 0.02	quantile	4	D:\RST\Gene100_6.csv	235	6.485682082	8	3	p`= 0.05	P = 0.75	[LUT,GRMZM2G300348] [LUT,GRMZM2G012966] [BC,GRMZM2G012966]
0.02 0.02 0.02	quantile	4	D:\RST\Gene100_7.csv	249	6.685239987	10	3	p`= 0.07	P = 0.75	[LUT,GRMZM2G012966] [LUT,GRMZM2G300348] [BC,GRMZM2G012966]
0.02 0.02 0.02	quantile	4	D:\RST\Gene100_8.csv	210	6.141193751	10	4	p`= 0.06	P = 1	[ZEA,GRMZM2G152135] [LUT,GRMZM2G012966] [LUT,GRMZM2G300348] [BC,GRMZM2G012966]
0.02 0.02 0.02	quantile	4	D:\RST\Gene100_9.csv	238	7.003838734	8	3	p`= 0.05	P = 0.75	[LUT,GRMZM2G012966] [LUT,GRMZM2G300348] [BC,GRMZM2G012966]
0.02 0.02 0.02	quantile	4	D:\RST\Gene100_10.csv	237	7.029773486	10	3	p`= 0.07	P = 0.75	[LUT,GRMZM2G300348] [LUT,GRMZM2G012966] [BC,GRMZM2G012966]
0.025 0.025 0.025	quantile	4	D:\RST\Gene100_1.csv	173	5.003687485	10	3	p`= 0.07	P = 0.75	[LUT,GRMZM2G012966] [LUT,GRMZM2G300348] [BC,GRMZM2G012966]
0.025 0.025 0.025	quantile	4	D:\RST\Gene100_2.csv	179	5.186996949	7	3	p`= 0.04	P = 0.75	[LUT,GRMZM2G012966] [LUT,GRMZM2G300348] [BC,GRMZM2G012966]
0.025 0.025 0.025	quantile	4	D:\RST\Gene100_3.csv	158	3.572804614	12	3	p`= 0.09	P = 0.75	[LUT,GRMZM2G012966] [LUT,GRMZM2G300348] [BC,GRMZM2G012966]
0.025 0.025 0.025	quantile	4	D:\RST\Gene100_4.csv	175	4.850506397	7	3	p`= 0.04	P = 0.75	[LUT,GRMZM2G012966] [LUT,GRMZM2G300348] [BC,GRMZM2G012966]
0.025 0.025 0.025	quantile	4	D:\RST\Gene100_5.csv	192	5.138445234	11	2	p`= 0.09	P = 0.5	[LUT,GRMZM2G012966] [BC,GRMZM2G012966]
0.025 0.025 0.025	quantile	4	D:\RST\Gene100_6.csv	185	4.672918999	7	3	p`= 0.04	P = 0.75	[LUT,GRMZM2G300348] [LUT,GRMZM2G012966] [BC,GRMZM2G012966]
0.025 0.025 0.025	quantile	4	D:\RST\Gene100_7.csv	176	4.571598566	11	3	p`= 0.08	P = 0.75	[LUT,GRMZM2G012966] [LUT,GRMZM2G300348] [BC,GRMZM2G012966]
0.025 0.025 0.025	quantile	4	D:\RST\Gene100_8.csv	147	4.145576898	9	3	p`= 0.06	P = 0.75	[LUT,GRMZM2G012966] [LUT,GRMZM2G300348] [BC,GRMZM2G012966]
0.025 0.025 0.025	quantile	4	D:\RST\Gene100_9.csv	173	5.236072	7	2	p`= 0.05	P = 0.5	[LUT,GRMZM2G300348] [BC,GRMZM2G012966]
0.025 0.025 0.025	quantile	4	D:\RST\Gene100_10.csv	173	5.054690202	8	3	p`= 0.05	P = 0.75	[LUT,GRMZM2G300348] [LUT,GRMZM2G012966] [BC,GRMZM2G012966]
0.02 0.01 0.01	quantile	4	D:\RST\Gene100_1.csv	318	7.786470115	15	3	p`= 0.12	P = 0.75	[LUT,GRMZM2G012966] [LUT,GRMZM2G300348] [BC,GRMZM2G012966]
0.02 0.01 0.01	quantile	4	D:\RST\Gene100_2.csv	329	7.742472017	16	3	p`= 0.13	P = 0.75	[LUT,GRMZM2G012966] [LUT,GRMZM2G300348] [BC,GRMZM2G012966]
0.02 0.01 0.01	quantile	4	D:\RST\Gene100_3.csv	268	5.997812152	20	3	p`= 0.17	P = 0.75	[LUT,GRMZM2G012966] [LUT,GRMZM2G300348] [BC,GRMZM2G012966]
0.02 0.01 0.01	quantile	4	D:\RST\Gene100_4.csv	329	7.504172949	18	4	p`= 0.14	P = 1	[ZEA,GRMZM2G152135] [LUT,GRMZM2G012966] [LUT,GRMZM2G300348] [BC,GRMZM2G012966]
0.02 0.01 0.01	quantile	4	D:\RST\Gene100_5.csv	334	7.65352275	18	3	p`= 0.15	P = 0.75	[LUT,GRMZM2G012966] [LUT,GRMZM2G300348] [BC,GRMZM2G012966]
0.02 0.01 0.01	quantile	4	D:\RST\Gene100_6.csv	325	6.9479056	13	4	p`= 0.09	P = 1	[ZEA,GRMZM2G012966] [LUT,GRMZM2G300348] [LUT,GRMZM2G012966] [BC,GRMZM2G012966]
0.02 0.01 0.01	quantile	4	D:\RST\Gene100_7.csv	338	7.336849082	16	3	p`= 0.13	P = 0.75	[LUT,GRMZM2G012966] [LUT,GRMZM2G300348] [BC,GRMZM2G012966]
0.02 0.01 0.01	quantile	4	D:\RST\Gene100_8.csv	303	6.792116185	17	4	p`= 0.13	P = 1	[ZEA,GRMZM2G152135] [LUT,GRMZM2G012966] [LUT,GRMZM2G300348] [BC,GRMZM2G012966]
0.02 0.01 0.01	quantile	4	D:\RST\Gene100_9.csv	348	7.632703598	12	3	p`= 0.09	P = 0.75	[LUT,GRMZM2G012966] [LUT,GRMZM2G300348] [BC,GRMZM2G012966]
0.02 0.01 0.01	quantile	4	D:\RST\Gene100_10.csv	326	7.478269565	14	4	p`= 0.1	P = 1	[ZEA,GRMZM2G152135] [LUT,GRMZM2G300348] [LUT,GRMZM2G012966] [BC,GRMZM2G012966]
0.01 0.01 0.01	quantile	3	D:\RST\Gene100_1.csv	461	15.34413015	26	5	p`= 0.21	P = 1.25	[ZEA,GRMZM2G152135] [LUT,GRMZM2G012966] [LUT,GRMZM2G300348] [BC,GRMZM2G012966] [AC,GRMZM2G152135]
0.01 0.01 0.01	quantile	3	D:\RST\Gene100_2.csv	528	16.61011546	26	7	p`= 0.19	P = 1.75	[ZEA,GRMZM2G152135] [LUT,GRMZM2G012966] [LUT,GRMZM2G300348] [Bcry,GRMZM2G108457] [Bcry,GRMZM2G152135] [BC,GRMZM2G012966] [AC,GRMZM2G152135]
0.01 0.01 0.01	quantile	3	D:\RST\Gene100_3.csv	421	13.15253658	30	6	p`= 0.24	P = 1.5	[ZEA,GRMZM2G012966] [ZEA,GRMZM2G152135] [LUT,GRMZM2G012966] [LUT,GRMZM2G300348] [BC,GRMZM2G012966] [AC,GRMZM2G152135]
0.01 0.01 0.01	quantile	3	D:\RST\Gene100_4.csv	513	15.30043747	20	7	p`= 0.13	P = 1.75	[ZEA,GRMZM2G152135] [ZEA,GRMZM2G012966] [LUT,GRMZM2G012966] [LUT,GRMZM2G300348] [Bcry,GRMZM2G108457] [BC,GRMZM2G012966] [AC,GRMZM2G152135]
0.01 0.01 0.01	quantile	3	D:\RST\Gene100_5.csv	496	15.67318587	23	7	p`= 0.16	P = 1.75	[ZEA,GRMZM2G152135] [LUT,GRMZM2G012966] [LUT,GRMZM2G300348] [BC,GRMZM2G012966] [BC,GRMZM2G152135] [BC,GRMZM2G108457] [AC,GRMZM2G152135]
0.01 0.01 0.01	quantile	3	D:\RST\Gene100_6.csv	469	14.2971605	25	6	p`= 0.19	P = 1.5	[ZEA,GRMZM2G152135] [LUT,GRMZM2G012966] [LUT,GRMZM2G300348] [Bcry,GRMZM2G108457] [BC,GRMZM2G012966] [AC,GRMZM2G152135]
0.01 0.01 0.01	quantile	3	D:\RST\Gene100_7.csv	490	14.83776356	22	5	p`= 0.17	P = 1.25	[ZEA,GRMZM2G152135] [LUT,GRMZM2G012966] [LUT,GRMZM2G300348] [BC,GRMZM2G012966] [AC,GRMZM2G152135]
0.01 0.01 0.01	quantile	3	D:\RST\Gene100_8.csv	480	14.3587828	24	7	p`= 0.17	P = 1.75	[ZEA,GRMZM2G152135] [ZEA,GRMZM2G012966] [LUT,GRMZM2G012966] [LUT,GRMZM2G300348] [Bcry,GRMZM2G108457] [BC,GRMZM2G012966] [AC,GRMZM2G152135]
0.01 0.01 0.01	quantile	3	D:\RST\Gene100_9.csv	506	15.69693594	18	5	p`= 0.13	P = 1.25	[ZEA,GRMZM2G152135] [LUT,GRMZM2G012966] [LUT,GRMZM2G300348] [BC,GRMZM2G012966] [AC,GRMZM2G152135]
0.01 0.01 0.01	quantile	3	D:\RST\Gene100_10.csv	512	15.55664512	19	6	p`= 0.13	P = 1.5	[ZEA,GRMZM2G152135] [ZEA,GRMZM2G012966] [LUT,GRMZM2G012966] [LUT,GRMZM2G300348] [BC,GRMZM2G012966] [BC,GRMZM2G152135]
0.015 0.015 0.015	quantile	3	D:\RST\Gene100_1.csv	300	9.457733333	13	3	p`= 0.1	P = 0.75	[LUT,GRMZM2G012966] [LUT,GRMZM2G300348] [BC,GRMZM2G012966]
0.015 0.015 0.015	quantile	3	D:\RST\Gene100_2.csv	321	10.0220279	13	4	p`= 0.09	P = 1	[ZEA,GRMZM2G152135] [LUT,GRMZM2G012966] [LUT,GRMZM2G300348] [BC,GRMZM2G012966]
0.015 0.015 0.015	quantile	3	D:\RST\Gene100_3.csv	269	7.583059486	16	4	p`= 0.12	P = 1	[LUT,GRMZM2G012966] [LUT,GRMZM2G300348] [BC,GRMZM2G012966] [AC,GRMZM2G152135]
0.015 0.015 0.015	quantile	3	D:\RST\Gene100_4.csv	325	9.468155166	13	5	p`= 0.08	P = 1.25	[LUT,GRMZM2G012966] [LUT,GRMZM2G300348] [Bcry,GRMZM2G108457] [BC,GRMZM2G012966] [AC,GRMZM2G152135]
0.015 0.015 0.015	quantile	3	D:\RST\Gene100_5.csv	320	9.546061818	18	4	p`= 0.14	P = 1	[LUT,GRMZM2G012966] [LUT,GRMZM2G300348] [BC,GRMZM2G012966] [AC,GRMZM2G152135]
0.015 0.015 0.015	quantile	3	D:\RST\Gene100_6.csv	315	8.778037214	13	4	p`= 0.09	P = 1	[LUT,GRMZM2G012966] [LUT,GRMZM2G300348] [BC,GRMZM2G012966] [AC,GRMZM2G152135]
0.015 0.015 0.015	quantile	3	D:\RST\Gene100_7.csv	294	8.728749251	13	5	p`= 0.08	P = 1.25	[ZEA,GRMZM2G152135] [LUT,GRMZM2G012966] [LUT,GRMZM2G300348] [BC,GRMZM2G012966] [AC,GRMZM2G152135]
0.015 0.015 0.015	quantile	3	D:\RST\Gene100_8.csv	289	8.510847334	16	4	p`= 0.12	P = 1	[ZEA,GRMZM2G152135] [LUT,GRMZM2G012966] [LUT,GRMZM2G300348] [BC,GRMZM2G012966]
0.015 0.015 0.015	quantile	3	D:\RST\Gene100_9.csv	314	9.947709548	15	5	p`= 0.1	P = 1.25	[ZEA,GRMZM2G152135] [LUT,GRMZM2G012966] [LUT,GRMZM2G300348] [BC,GRMZM2G012966] [AC,GRMZM2G152135]
0.015 0.015 0.015	quantile	3	D:\RST\Gene100_10.csv	332	9.292212447	11	3	p`= 0.08	P = 0.75	[LUT,GRMZM2G012966] [LUT,GRMZM2G300348] [BC,GRMZM2G012966]
0.02 0.02 0.02	quantile	3	D:\RST\Gene100_1.csv	197	6.006155352	11	3	p`= 0.08	P = 0.75	[LUT,GRMZM2G012966] [LUT,GRMZM2G300348] [BC,GRMZM2G012966]
0.02 0.02 0.02	quantile	3	D:\RST\Gene100_2.csv	239	6.755695303	9	3	p`= 0.06	P = 0.75	[LUT,GRMZM2G012966] [LUT,GRMZM2G300348] [BC,GRMZM2G012966]
0.02 0.02 0.02	quantile	3	D:\RST\Gene100_3.csv	190	4.975081964	11	3	p`= 0.08	P = 0.75	[LUT,GRMZM2G012966] [LUT,GRMZM2G300348] [BC,GRMZM2G012966]
0.02 0.02 0.02	quantile	3	D:\RST\Gene100_4.csv	219	5.925783869	7	3	p`= 0.04	P = 0.75	[LUT,GRMZM2G012966] [LUT,GRMZM2G300348] [BC,GRMZM2G012966]
0.02 0.02 0.02	quantile	3	D:\RST\Gene100_5.csv	220	6.599313116	13	4	p`= 0.09	P = 1	[LUT,GRMZM2G012966] [LUT,GRMZM2G300348] [BC,GRMZM2G012966] [AC,GRMZM2G152135]
0.02 0.02 0.02	quantile	3	D:\RST\Gene100_6.csv	214	5.770354648	7	4	p`= 0.03	P = 1	[LUT,GRMZM2G012966] [LUT,GRMZM2G300348] [BC,GRMZM2G012966] [AC,GRMZM2G152135]
0.02 0.02 0.02	quantile	3	D:\RST\Gene100_7.csv	216	5.841943483	9	3	p`= 0.06	P = 0.75	[LUT,GRMZM2G012966] [LUT,GRMZM2G300348] [BC,GRMZM2G012966]
0.02 0.02 0.02	quantile	3	D:\RST\Gene100_8.csv	182	5.376832048	9	4	p`= 0.05	P = 1	[ZEA,GRMZM2G152135] [LUT,GRMZM2G012966] [LUT,GRMZM2G300348] [BC,GRMZM2G012966]
0.02 0.02 0.02	quantile	3	D:\RST\Gene100_9.csv	213	6.848542885	10	4	p`= 0.06	P = 1	[LUT,GRMZM2G012966] [LUT,GRMZM2G300348] [BC,GRMZM2G012966] [AC,GRMZM2G152135]
0.02 0.02 0.02	quantile	3	D:\RST\Gene100_10.csv	225	6.115954483	9	3	p`= 0.06	P = 0.75	[LUT,GRMZM2G012966] [LUT,GRMZM2G300348] [BC,GRMZM2G012966]
0.025 0.025 0.025	quantile	3	D:\RST\Gene100_1.csv	167	4.435423382	9	3	p`= 0.06	P = 0.75	[LUT,GRMZM2G012966] [LUT,GRMZM2G300348] [BC,GRMZM2G012966]
0.025 0.025 0.025	quantile	3	D:\RST\Gene100_2.csv	176	4.473788786	7	3	p`= 0.04	P = 0.75	[LUT,GRMZM2G012966] [LUT,GRMZM2G300348] [BC,GRMZM2G012966]
0.025 0.025 0.025	quantile	3	D:\RST\Gene100_3.csv	141	3.1871587	12	3	p`= 0.09	P = 0.75	[LUT,GRMZM2G012966] [LUT,GRMZM2G300348] [BC,GRMZM2G012966]
0.025 0.025 0.025	quantile	3	D:\RST\Gene100_4.csv	160	3.637397548	7	3	p`= 0.04	P = 0.75	[LUT,GRMZM2G012966] [LUT,GRMZM2G300348] [BC,GRMZM2G012966]
0.025 0.025 0.025	quantile	3	D:\RST\Gene100_5.csv	169	4.578301966	8	3	p`= 0.05	P = 0.75	[LUT,GRMZM2G012966] [LUT,GRMZM2G300348] [BC,GRMZM2G012966]
0.025 0.025 0.025	quantile	3	D:\RST\Gene100_6.csv	160	3.872607152	6	2	p`= 0.04	P = 0.5	[LUT,GRMZM2G012966] [BC,GRMZM2G012966]
0.025 0.025 0.025	quantile	3	D:\RST\Gene100_7.csv	163	4.044394135	9	3	p`= 0.06	P = 0.75	[LUT,GRMZM2G012966] [LUT,GRMZM2G300348] [BC,GRMZM2G012966]
0.025 0.025 0.025	quantile	3	D:\RST\Gene100_8.csv	136	3.601818101	9	3	p`= 0.06	P = 0.75	[LUT,GRMZM2G012966] [LUT,GRMZM2G300348] [BC,GRMZM2G012966]
0.025 0.025 0.025	quantile	3	D:\RST\Gene100_9.csv	155	4.575483199	7	3	p`= 0.04	P = 0.75	[LUT,GRMZM2G012966] [LUT,GRMZM2G300348] [BC,GRMZM2G012966]
0.025 0.025 0.025	quantile	3	D:\RST\Gene100_10.csv	152	3.90312417	9	3	p`= 0.06	P = 0.75	[LUT,GRMZM2G012966] [LUT,GRMZM2G300348] [BC,GRMZM2G012966]
0.02 0.01 0.01	quantile	3	D:\RST\Gene100_1.csv	269	6.451634669	16	3	p`= 0.13	P = 0.75	[LUT,GRMZM2G012966] [LUT,GRMZM2G300348] [BC,GRMZM2G012966]
0.02 0.01 0.01	quantile	3	D:\RST\Gene100_2.csv	309	6.852815648	14	3	p`= 0.11	P = 0.75	[LUT,GRMZM2G012966] [LUT,GRMZM2G300348] [BC,GRMZM2G012966]
0.02 0.01 0.01	quantile	3	D:\RST\Gene100_3.csv	253	5.393547483	22	6	p`= 0.16	P = 1.5	[ZEA,GRMZM2G012966] [ZEA,GRMZM2G152135] [LUT,GRMZM2G012966] [LUT,GRMZM2G300348] [BC,GRMZM2G012966] [AC,GRMZM2G152135]
0.02 0.01 0.01	quantile	3	D:\RST\Gene100_4.csv	302	6.222421567	14	5	p`= 0.09	P = 1.25	[ZEA,GRMZM2G152135] [LUT,GRMZM2G012966] [LUT,GRMZM2G300348] [Bcry,GRMZM2G108457] [BC,GRMZM2G012966]
0.02 0.01 0.01	quantile	3	D:\RST\Gene100_5.csv	297	7.107050316	19	4	p`= 0.15	P = 1	[LUT,GRMZM2G012966] [LUT,GRMZM2G300348] [BC,GRMZM2G012966] [AC,GRMZM2G152135]
0.02 0.01 0.01	quantile	3	D:\RST\Gene100_6.csv	288	6.096608849	13	4	p`= 0.09	P = 1	[LUT,GRMZM2G012966] [LUT,GRMZM2G300348] [BC,GRMZM2G012966] [AC,GRMZM2G152135]
0.02 0.01 0.01	quantile	3	D:\RST\Gene100_7.csv	287	6.019603884	13	3	p`= 0.1	P = 0.75	[LUT,GRMZM2G012966] [LUT,GRMZM2G300348] [BC,GRMZM2G012966]
0.02 0.01 0.01	quantile	3	D:\RST\Gene100_8.csv	251	5.691369716	13	4	p`= 0.09	P = 1	[ZEA,GRMZM2G152135] [LUT,GRMZM2G012966] [LUT,GRMZM2G300348] [BC,GRMZM2G012966]
0.02 0.01 0.01	quantile	3	D:\RST\Gene100_9.csv	308	7.070305216	15	4	p`= 0.11	P = 1	[LUT,GRMZM2G012966] [LUT,GRMZM2G300348] [BC,GRMZM2G012966] [AC,GRMZM2G152135]
0.02 0.01 0.01	quantile	3	D:\RST\Gene100_10.csv	296	6.337499368	13	3	p`= 0.1	P = 0.75	[LUT,GRMZM2G012966] [LUT,GRMZM2G300348] [BC,GRMZM2G012966]
0.01 0.01 0.01	quantile	2	D:\RST\Gene100_1.csv	392	12.19574645	21	3	p`= 0.18	P = 0.75	[LUT,GRMZM2G300348] [LUT,GRMZM2G012966] [BC,GRMZM2G012966]
0.01 0.01 0.01	quantile	2	D:\RST\Gene100_2.csv	421	12.1095945	16	3	p`= 0.13	P = 0.75	[LUT,GRMZM2G012966] [LUT,GRMZM2G300348] [BC,GRMZM2G012966]
0.01 0.01 0.01	quantile	2	D:\RST\Gene100_3.csv	329	8.88323185	25	5	p`= 0.2	P = 1.25	[ZEA,GRMZM2G012966] [LUT,GRMZM2G300348] [GRMZM2G012966,LUT] [Bcry,GRMZM2G152135] [BC,GRMZM2G012966]
0.01 0.01 0.01	quantile	2	D:\RST\Gene100_4.csv	405	10.9835105	15	3	p`= 0.12	P = 0.75	[LUT,GRMZM2G300348] [GRMZM2G012966,LUT] [BC,GRMZM2G012966]
0.01 0.01 0.01	quantile	2	D:\RST\Gene100_5.csv	386	11.34707818	17	3	p`= 0.14	P = 0.75	[LUT,GRMZM2G012966] [LUT,GRMZM2G300348] [BC,GRMZM2G012966]
0.01 0.01 0.01	quantile	2	D:\RST\Gene100_6.csv	400	10.86280423	17	3	p`= 0.14	P = 0.75	[LUT,GRMZM2G300348] [GRMZM2G012966,LUT] [BC,GRMZM2G012966]
0.01 0.01 0.01	quantile	2	D:\RST\Gene100_7.csv	402	10.92911428	18	4	p`= 0.14	P = 1	[LUT,GRMZM2G012966] [LUT,GRMZM2G300348] [Bcry,GRMZM2G152135] [BC,GRMZM2G012966]
0.01 0.01 0.01	quantile	2	D:\RST\Gene100_8.csv	403	10.58153585	23	3	p`= 0.2	P = 0.75	[LUT,GRMZM2G012966] [LUT,GRMZM2G300348] [BC,GRMZM2G012966]
0.01 0.01 0.01	quantile	2	D:\RST\Gene100_9.csv	417	11.88770755	16	4	p`= 0.12	P = 1	[LUT,GRMZM2G300348] [GRMZM2G012966,LUT] [Bcry,GRMZM2G152135] [BC,GRMZM2G012966]
0.01 0.01 0.01	quantile	2	D:\RST\Gene100_10.csv	414	11.31458128	17	4	p`= 0.13	P = 1	[ZEA,GRMZM2G152135] [LUT,GRMZM2G300348] [LUT,GRMZM2G012966] [BC,GRMZM2G012966]
0.015 0.015 0.015	quantile	2	D:\RST\Gene100_1.csv	234	6.466763683	12	2	p`= 0.1	P = 0.5	[LUT,GRMZM2G012966] [BC,GRMZM2G012966]
0.015 0.015 0.015	quantile	2	D:\RST\Gene100_2.csv	250	6.663949533	11	2	p`= 0.09	P = 0.5	[LUT,GRMZM2G012966] [BC,GRMZM2G012966]
0.015 0.015 0.015	quantile	2	D:\RST\Gene100_3.csv	197	4.413756768	11	2	p`= 0.09	P = 0.5	[GRMZM2G012966,LUT] [BC,GRMZM2G012966]
0.015 0.015 0.015	quantile	2	D:\RST\Gene100_4.csv	232	5.813933484	6	2	p`= 0.04	P = 0.5	[GRMZM2G012966,LUT] [BC,GRMZM2G012966]
0.015 0.015 0.015	quantile	2	D:\RST\Gene100_5.csv	239	6.341484833	12	3	p`= 0.09	P = 0.75	[LUT,GRMZM2G012966] [LUT,GRMZM2G300348] [BC,GRMZM2G012966]
0.015 0.015 0.015	quantile	2	D:\RST\Gene100_6.csv	234	5.898942701	9	2	p`= 0.07	P = 0.5	[GRMZM2G012966,LUT] [BC,GRMZM2G012966]
0.015 0.015 0.015	quantile	2	D:\RST\Gene100_7.csv	226	5.74877975	12	2	p`= 0.1	P = 0.5	[LUT,GRMZM2G012966] [BC,GRMZM2G012966]
0.015 0.015 0.015	quantile	2	D:\RST\Gene100_8.csv	209	5.496604967	11	3	p`= 0.08	P = 0.75	[LUT,GRMZM2G012966] [LUT,GRMZM2G300348] [BC,GRMZM2G012966]
0.015 0.015 0.015	quantile	2	D:\RST\Gene100_9.csv	250	6.511547518	10	2	p`= 0.08	P = 0.5	[GRMZM2G012966,LUT] [BC,GRMZM2G012966]
0.015 0.015 0.015	quantile	2	D:\RST\Gene100_10.csv	249	6.152027933	10	3	p`= 0.07	P = 0.75	[LUT,GRMZM2G300348] [LUT,GRMZM2G012966] [BC,GRMZM2G012966]
0.02 0.02 0.02	quantile	2	D:\RST\Gene100_1.csv	177	4.583702485	14	2	p`= 0.12	P = 0.5	[LUT,GRMZM2G012966] [BC,GRMZM2G012966]
0.02 0.02 0.02	quantile	2	D:\RST\Gene100_2.csv	177	4.185112365	7	2	p`= 0.05	P = 0.5	[LUT,GRMZM2G012966] [BC,GRMZM2G012966]
0.02 0.02 0.02	quantile	2	D:\RST\Gene100_3.csv	142	2.6756248	8	2	p`= 0.06	P = 0.5	[GRMZM2G012966,LUT] [BC,GRMZM2G012966]
0.02 0.02 0.02	quantile	2	D:\RST\Gene100_4.csv	161	3.335021734	5	2	p`= 0.03	P = 0.5	[GRMZM2G012966,LUT] [BC,GRMZM2G012966]
0.02 0.02 0.02	quantile	2	D:\RST\Gene100_5.csv	166	4.16180495	12	3	p`= 0.09	P = 0.75	[LUT,GRMZM2G012966] [LUT,GRMZM2G300348] [BC,GRMZM2G012966]
0.02 0.02 0.02	quantile	2	D:\RST\Gene100_6.csv	167	3.653651734	7	2	p`= 0.05	P = 0.5	[GRMZM2G012966,LUT] [BC,GRMZM2G012966]
0.02 0.02 0.02	quantile	2	D:\RST\Gene100_7.csv	160	3.416331999	8	2	p`= 0.06	P = 0.5	[LUT,GRMZM2G012966] [BC,GRMZM2G012966]
0.02 0.02 0.02	quantile	2	D:\RST\Gene100_8.csv	141	3.360105352	7	2	p`= 0.05	P = 0.5	[LUT,GRMZM2G012966] [BC,GRMZM2G012966]
0.02 0.02 0.02	quantile	2	D:\RST\Gene100_9.csv	178	4.424478316	6	2	p`= 0.04	P = 0.5	[GRMZM2G012966,LUT] [BC,GRMZM2G012966]
0.02 0.02 0.02	quantile	2	D:\RST\Gene100_10.csv	160	3.553334113	10	3	p`= 0.07	P = 0.75	[LUT,GRMZM2G300348] [LUT,GRMZM2G012966] [BC,GRMZM2G012966]
0.025 0.025 0.025	quantile	2	D:\RST\Gene100_1.csv	121	2.367880833	8	2	p`= 0.06	P = 0.5	[LUT,GRMZM2G012966] [BC,GRMZM2G012966]
0.025 0.025 0.025	quantile	2	D:\RST\Gene100_2.csv	126	2.137879368	6	2	p`= 0.04	P = 0.5	[LUT,GRMZM2G012966] [BC,GRMZM2G012966]
0.025 0.025 0.025	quantile	2	D:\RST\Gene100_3.csv	95	1.614500034	8	2	p`= 0.06	P = 0.5	[GRMZM2G012966,LUT] [BC,GRMZM2G012966]
0.025 0.025 0.025	quantile	2	D:\RST\Gene100_4.csv	109	1.876536433	6	2	p`= 0.04	P = 0.5	[GRMZM2G012966,LUT] [BC,GRMZM2G012966]
0.025 0.025 0.025	quantile	2	D:\RST\Gene100_5.csv	117	2.616816382	8	1	p`= 0.07	P = 0.25	[LUT,GRMZM2G300348]
0.025 0.025 0.025	quantile	2	D:\RST\Gene100_6.csv	121	2.16588492	7	1	p`= 0.06	P = 0.25	[BC,GRMZM2G012966]
0.025 0.025 0.025	quantile	2	D:\RST\Gene100_7.csv	108	2.016338817	8	2	p`= 0.06	P = 0.5	[LUT,GRMZM2G012966] [BC,GRMZM2G012966]
0.025 0.025 0.025	quantile	2	D:\RST\Gene100_8.csv	99	1.674681767	9	1	p`= 0.08	P = 0.25	[LUT,GRMZM2G012966]
0.025 0.025 0.025	quantile	2	D:\RST\Gene100_9.csv	112	2.814014431	6	2	p`= 0.04	P = 0.5	[GRMZM2G012966,LUT] [BC,GRMZM2G012966]
0.025 0.025 0.025	quantile	2	D:\RST\Gene100_10.csv	124	1.968282318	7	1	p`= 0.06	P = 0.25	[BC,GRMZM2G012966]
0.02 0.01 0.01	quantile	2	D:\RST\Gene100_1.csv	222	5.045649298	15	2	p`= 0.13	P = 0.5	[LUT,GRMZM2G012966] [BC,GRMZM2G012966]
0.02 0.01 0.01	quantile	2	D:\RST\Gene100_2.csv	214	4.057305853	10	2	p`= 0.08	P = 0.5	[LUT,GRMZM2G012966] [BC,GRMZM2G012966]
0.02 0.01 0.01	quantile	2	D:\RST\Gene100_3.csv	171	2.735777732	10	2	p`= 0.08	P = 0.5	[GRMZM2G012966,LUT] [BC,GRMZM2G012966]
0.02 0.01 0.01	quantile	2	D:\RST\Gene100_4.csv	202	3.539692434	10	2	p`= 0.08	P = 0.5	[GRMZM2G012966,LUT] [BC,GRMZM2G012966]
0.02 0.01 0.01	quantile	2	D:\RST\Gene100_5.csv	224	4.428121416	15	3	p`= 0.12	P = 0.75	[LUT,GRMZM2G012966] [LUT,GRMZM2G300348] [BC,GRMZM2G012966]
0.02 0.01 0.01	quantile	2	D:\RST\Gene100_6.csv	211	3.875836098	9	2	p`= 0.07	P = 0.5	[GRMZM2G012966,LUT] [BC,GRMZM2G012966]
0.02 0.01 0.01	quantile	2	D:\RST\Gene100_7.csv	196	3.543979486	10	2	p`= 0.08	P = 0.5	[LUT,GRMZM2G012966] [BC,GRMZM2G012966]
0.02 0.01 0.01	quantile	2	D:\RST\Gene100_8.csv	193	3.561352098	11	2	p`= 0.09	P = 0.5	[LUT,GRMZM2G012966] [BC,GRMZM2G012966]
0.02 0.01 0.01	quantile	2	D:\RST\Gene100_9.csv	230	4.613585333	10	2	p`= 0.08	P = 0.5	[GRMZM2G012966,LUT] [BC,GRMZM2G012966]
0.02 0.01 0.01	quantile	2	D:\RST\Gene100_10.csv	208	3.816932015	11	3	p`= 0.08	P = 0.75	[LUT,GRMZM2G300348] [LUT,GRMZM2G012966] [BC,GRMZM2G012966]
